# Supplementary material for: PTEN and DNA-PK determine sensitivity and recovery in response to WEE1 inhibition in human breast cancer
Source: eLife. 2020 Jul 6;9:e57894. doi: 10.7554/eLife.57894 (PMC7338058; doi:10.7554/eLife.57894)
Supplement: Figure 1—source data 1. — (A) High content image-based drug screening of AZD1775 and AZD6738 in breast cancer cell lines. (C) Acute response to AZD1775, AZD6738 or the combination relative to DMSO-treated control in different BC cell lines. Cell numbers relative to DMSO as analysed by crystal violet staining and quantified by colorimetry after 72 hr treatment. (Figure supplement 1C) Viability matrix based on alamarBlue staining to assess synergy between AZD1775 and AZD6738 in MDA-MB-231 cells. (Figure supplement 1D) Quantification of recovery of proliferation following removal of AZD1775 in different BC cell lines. Cells were treated for three days and allowed to recover for an additional four days without the drugs. Regrowth was calculated by crystal violet stainings (Regrowth index; RI = OD after 4 days recovery minus OD after 3 days treatment, divided by OD 3 days treatment). [file elife-57894-fig1-data1.xlsx]

## Sheet: A
High content image-based drug screening of AZD1775 and AZD6738 in breast cancer cell lines
Data presented as raw cell counts from imaging cytometry
*DMSO 0.1%
Compound	Concentration (nM)	BT20	BT549	CAL51	HCC38	HCC70	HCC1143	HCC1187	HCC1419	HCC1428	HCC1569	HCC1937	HCC1954	MCF7	SKBR3	SUM149PT	T47D
DMSO	0.001	854	1520	2421	567	920	2308	618	648	650	762	1453	1493	1046	1008	1086	2158
DMSO	0.001	863	1641	2869	561	749	2429	732	709	709	702	1246	1276	910	1293	1006	1953
AZD6738	40	829	1479	2100	577	797	2321	672	792	733	553	1409	1584	1068	974	1356	2061
AZD6738	40	667	1441	2199	449	788	2171	618	676	729	712	1400	1580	868	939	1110	2052
AZD6738	40	907	1041	2148	493	851	2076	642	720	649	750	1260	1656	848	1324	951	1757
AZD1775	1000	202	78	69	73	112	867	84	400	596	270	345	505	230	232	71	921
DMSO	0.001	842	1516	2638	442	757	2533	614	609	775	774	1289	1662	1094	1059	1308	1942
AZD1775	1000	205	134	100	62	120	1058	76	353	667	230	308	422	248	318	96	986
AZD1775	1000	187	119	77	73	68	1094	100	401	639	236	360	499	230	231	76	832
DMSO	0.001	802	1277	2812	613	846	2510	624	596	794	655	1310	1358	860	1124	983	1879
AZD1775	8	748	1310	2402	561	891	2280	800	706	759	682	1172	1539	1162	1184	922	1946
DMSO	0.001	881	1430	2770	608	965	2804	632	762	834	626	1346	1691	1286	1139	1268	1957
AZD1775	8	828	1400	2175	462	880	2208	628	706	814	766	1304	1429	902	925	1228	1993
AZD1775	8	728	1321	2482	452	815	2275	506	614	681	769	1528	1523	900	1276	1171	1662
DMSO	0.001	689	1405	3105	593	857	2585	1064	583	740	586	1296	1675	1200	1054	1253	1777
DMSO	0.001	754	1536	2798	454	591	2836	850	609	668	678	1390	1725	998	1266	1093	1595
DMSO	0.001	848	1469	2997	576	722	2735	690	674	834	727	1303	1397	1098	1133	1315	1739
AZD1775	200	783	926	2091	334	560	2190	522	586	711	311	1050	1474	930	1002	638	1835
AZD1775	200	814	1196	2180	241	381	2427	698	687	652	275	938	1550	956	826	652	1616
AZD1775	200	792	910	2080	275	290	2332	426	487	752	371	807	1588	928	1064	586	1964
DMSO	0.001	779	1406	2642	547	889	2381	784	635	810	766	1329	1537	1104	1201	1331	2017
DMSO	0.001	769	1512	2470	575	1033	2516	654	638	725	631	1302	1700	822	1290	932	1888
DMSO	0.001	708	1569	2825	548	709	2876	654	594	786	794	1375	1420	842	1131	1023	1740
DMSO	0.001	830	1176	2510	445	935	2323	646	622	559	824	1341	1477	908	1170	977	1952
AZD1775	5000	78	0	56	70	43	290	16	144	382	199	133	126	186	51	0	360
AZD1775	5000	95	30	56	59	56	264	26	169	367	209	171	135	168	53	5	387
DMSO	0.001	833	1378	2717	491	1070	2637	722	537	785	860	1197	1645	796	1105	991	913
AZD1775	5000	77	18	53	72	18	302	10	224	349	209	149	122	184	64	1	370
AZD6738	1000	545	820	563	175	424	2596	204	656	807	461	1142	1360	732	1023	241	1977
AZD1775	40	752	1253	2151	507	627	2197	784	631	801	642	1186	1363	1068	1080	937	2083
AZD1775	40	723	1371	2205	463	733	2139	674	650	681	774	1212	1563	1018	1096	887	1766
AZD1775	40	698	1249	2569	484	566	2112	832	645	729	589	1251	1285	706	1045	1052	1509
DMSO	0.001	839	1450	2536	650	847	2382	896	702	852	616	1305	1642	958	1132	1438	1744
AZD6738	8	723	1256	2175	490	696	2373	642	631	778	699	1244	1372	1142	1203	708	2010
AZD6738	8	764	873	2171	477	992	2215	890	702	644	707	1521	1594	1056	1214	966	1577
AZD6738	8	766	1786	2528	531	747	2325	718	661	773	645	1409	1599	1038	1071	1329	1790
AZD6738	1000	545	818	607	216	314	2558	272	621	659	437	1006	1484	708	969	247	2366
AZD6738	1000	604	765	599	220	628	2314	306	774	796	370	1129	1330	712	906	189	1800
DMSO	0.001	880	1233	2448	385	876	2633	532	649	765	794	1244	1561	1026	1023	1198	2092
DMSO	0.001	896	1446	2870	574	947	2852	540	852	772	645	1234	1230	1074	1221	1088	1638
AZD6738	5000	414	204	108	93	129	1079	342	426	630	217	505	588	384	637	114	1209
AZD6738	5000	378	172	124	80	194	1012	244	442	560	214	412	540	358	529	75	1276
AZD6738	5000	360	153	112	61	153	985	272	458	562	258	505	675	326	506	65	1377
DMSO	0.001	817	1700	2792	532	1013	2848	786	579	811	811	1379	1666	1060	1104	1108	1887
DMSO	0.001	901	1665	2691	513	775	2472	544	628	700	733	1272	1585	1084	1230	960	1594
AZD6738	200	770	1433	2029	536	648	2421	910	660	838	784	1206	1675	910	888	779	1884
AZD6738	200	631	1304	1899	482	469	2495	320	530	642	691	1189	1711	930	933	711	1948
AZD6738	200	658	1450	1956	373	667	2372	552	682	664	793	1248	1747	888	945	849	2076
DMSO	0.001	789	1291	2511	570	822	2435	448	575	771	632	1215	1698	880	1020	856	2235
DMSO	0.001	849	1300	2477	628	855	2346	630	669	652	925	1124	1518	1140	1080	917	1885

## Sheet: C
	AZD6738 (2X)		AZD1775		AZD1775 - 6738 (1:2)
HCC1954	94.9591	95.3001	62.5665	54.9441	31.3249	24.6918
HCC1143	76.3843	74.4904	65.4512	61.6651	31.3993	31.2653
BT20	85.867	83.8775	59.7798	63.7802	35.8569	38.4296
SUM159PT	73.4882	81.8128	30.099	55.5195	14.435	10.9725
HCC38	88.073	71.6949	25.7937	30.27	18.5919	25.2787
HCC70	94.8877	95.5149	31.2029	34.4962	26.8502	30.9303
HCC1937	74.9632	73.2239	34.7943	32.593	24.5659	25.9316

## Sheet: S1C
Plate 1
0h		AZD6738
		0	50	100	250	500	1000	2000	2500	5000	10000
AZD1775	0	693.379	726.789	732.494	706.513	726.665	705.958	682.023	646.86	631.667	513.645
	50	720.38	746.891	738.69	716.591	728.71	658.49	597.649	580.345	576.803	503.182
	250	658.124	682.635	656.34	617.597	596.367	565.315	554.612	547.381	551.176	491.235
	500	590.648	599.677	601.48	578.73	578.529	557.342	559.761	549.529	545.67	527.978
	1000	586.488	571.78	578.352	567.06	557.638	550.462	534.433	544.721	526.036	509.552
	2000	530.437	534.161	542.934	525.778	538.994	539.857	535.53	543.883	519.052	520.876
Plate 1
3h		AZD6738
		0	50	100	250	500	1000	2000	2500	5000	10000
AZD1775	0	8134.87	8077.14	7808.73	7904.09	7976.43	7668.44	7310.47	6605.55	6682.47	5176.96
	50	7608.61	7370	7262.07	7287.69	6926.11	6150.33	4917.63	4568.78	3932.2	3803.86
	250	7037.4	6422.57	6004.74	5432.9	4792.33	3737.16	3261.46	3305.19	3282.96	3262.59
	500	5259.77	4898.75	4824.35	4156.2	3744.11	3281.41	3150.66	3105.25	3137.03	3159.26
	1000	4389.68	4116.65	4073.88	3812.45	3513.26	2983.23	2735.15	2793.97	2787.02	2968.36
	2000	3478.01	3287.51	3491.64	3043.45	3071.65	2634.79	2476.75	2621.46	2361.03	2569.73
Plate 1
Background subtraction		AZD6738
		0	50	100	250	500	1000	2000	2500	5000	10000
AZD1775	0	7441.49	7350.35	7076.24	7197.57	7249.77	6962.48	6628.45	5958.69	6050.81	4663.32
	50	6888.23	6623.11	6523.38	6571.1	6197.4	5491.84	4319.98	3988.44	3355.39	3300.67
	250	6379.28	5739.93	5348.4	4815.3	4195.96	3171.85	2706.84	2757.81	2731.79	2771.35
	500	4669.12	4299.07	4222.87	3577.47	3165.58	2724.07	2590.9	2555.72	2591.36	2631.28
	1000	3803.19	3544.87	3495.52	3245.39	2955.62	2432.77	2200.71	2249.25	2260.99	2458.81
	2000	2947.57	2753.34	2948.7	2517.67	2532.66	2094.93	1941.22	2077.57	1841.98	2048.86
Plate 1
Cell viability		AZD6738
		0	50	100	250	500	1000	2000	2500	5000	10000
AZD1775	0	100	98.7752	95.0917	96.7221	97.4235	93.5629	89.0742	80.0739	81.3117	62.6664
	50	92.5651	89.0024	87.6622	88.3035	83.2817	73.8002	58.0526	53.5973	45.0903	44.355
	250	85.7258	77.1341	71.8727	64.7088	56.386	42.6238	36.375	37.0599	36.7102	37.2419
	500	62.7444	57.7716	56.7476	48.0747	42.5396	36.6065	34.8169	34.3442	34.8231	35.3596
	1000	51.1079	47.6365	46.9734	43.6121	39.7181	32.6919	29.5735	30.2258	30.3835	33.0419
	2000	39.61	36.9999	39.6251	33.8329	34.0343	28.152	26.0864	27.9188	24.7528	27.5328
Plate 2
0h		AZD6738
		0	50	100	250	500	1000	2000	2500	5000	10000
AZD1775	0	788.115	822.132	765.262	798.268	812.712	595.055	762.223	740.335	655.655	553.602
	50	794.099	817.383	833.22	803.77	616.06	615.935	602.45	581.061	560.731	554.342
	250	714.927	722.521	699.055	706.206	644.555	565.316	583.11	584.457	540.925	519.724
	500	636.393	655.553	663.246	635.913	605.097	562.093	586.424	586.987	557.838	537.03
	1000	623.248	612.741	616.777	610.944	583.553	563.65	542.034	541.453	538.456	520.511
	2000	602.865	594.032	599.019	577.289	580.413	538.615	567.874	571.547	554.702	549.113
Plate 2
3h		AZD6738
		0	50	100	250	500	1000	2000	2500	5000	10000
AZD1775	0	8114.24	8205.74	7835.05	7810.84	7873.85	7586.48	7290.13	6735.03	6273.71	5122.47
	50	7582.87	7276.22	7111.61	6998.71	6402.93	5591.16	4710.62	4275.69	3651.31	3669.13
	250	6870.12	6238.03	5739.44	4819.27	3927.22	2606.69	2935.3	3149.14	3463.26	3171.93
	500	5295.79	4986.87	4633.88	3647.38	2604.41	2303.38	2814.99	2963.59	2963.75	2958.61
	1000	4434.44	4269.68	3910.51	3565.54	3076.51	2846.82	2689.27	2652.71	2698.41	2740.13
	2000	3882.55	3741.74	3675.07	3136.2	2920.1	2664.07	2549.64	2414.98	2403.49	2301.68
Plate 2
Background subtraction		AZD6738
		0	50	100	250	500	1000	2000	2500	5000	10000
AZD1775	0	7326.13	7383.61	7069.78	7012.57	7061.14	6991.43	6527.9	5994.7	5618.06	4568.87
	50	6788.77	6458.84	6278.39	6194.94	5786.87	4975.23	4108.17	3694.63	3090.58	3114.79
	250	6155.19	5515.51	5040.38	4113.06	3282.66	2041.38	2352.19	2564.68	2922.34	2652.21
	500	4659.4	4331.32	3970.64	3011.46	1999.31	1741.29	2228.56	2376.6	2405.91	2421.58
	1000	3811.19	3656.94	3293.74	2954.59	2492.96	2283.17	2147.24	2111.26	2159.95	2219.62
	2000	3279.68	3147.71	3076.05	2558.91	2339.68	2125.45	1981.77	1843.43	1848.79	1752.56
Plate 2
Cell viability		AZD6738
		0	50	100	250	500	1000	2000	2500	5000	10000
AZD1775	0	100	100.785	96.5009	95.72	96.383	95.4314	89.1044	81.8263	76.6852	62.364
	50	92.6651	88.1616	85.6987	84.5595	78.9894	67.9107	56.0756	50.4308	42.1857	42.5161
	250	84.017	75.2855	68.8001	56.1424	44.8076	27.8643	32.1068	35.0073	39.8892	36.202
	500	63.5998	59.1215	54.1983	41.1058	27.2901	23.7681	30.4194	32.44	32.8402	33.0541
	1000	52.0218	49.9164	44.9587	40.3295	34.0283	31.1648	29.3093	28.8182	29.4829	30.2973
	2000	44.7669	42.9655	41.9874	34.9286	31.9361	29.0119	27.0507	25.1624	25.2355	23.9221
Average		AZD6738
		0	50	100	250	500	1000	2000	2500	5000	10000
AZD1775	0	100	99.7799	95.7963	96.2211	96.9033	94.4972	89.0893	80.9501	78.9985	62.5152
	50	92.6151	88.582	86.6804	86.4315	81.1356	70.8554	57.0641	52.0141	43.638	43.4356
	250	84.8714	76.2098	70.3364	60.4256	50.5968	35.2441	34.2409	36.0336	38.2997	36.722
	500	63.1721	58.4466	55.473	44.5902	34.9148	30.1873	32.6181	33.3921	33.8316	34.2068
	1000	51.5649	48.7765	45.9661	41.9708	36.8732	31.9283	29.4414	29.522	29.9332	31.6696
	2000	42.1884	39.9827	40.8062	34.3807	32.9852	28.582	26.5686	26.5406	24.9942	25.7275

## Sheet: S1D
	Folds of re-growth after AZD1775 wash-out
Cell line	Exp #1	Exp #2	Exp #3	Exp #4	Mean	SD
Cal51	4.54963	8.99222	4.62272	4.17258	5.58429	2.2805
SUM159PT	2.18165	1.44154	2.42624		2.01648	0.512711
MDA-MB-468	1.26574	1.98092			1.62333	0.505704
MDA-MB-231	0.921223	1.20225			1.06174	0.198719
HCC1143	0.751014	1.14981	0.618582		0.839801	0.276518
BT20	0.374373	0.545316	1.20529		0.708325	0.438787
HCC1954	0.574183	0.288069			0.431126	0.202314
SUM149PT	0.105141	0.442621	0.339332		0.295698	0.172919
BT549	-0.0257526	-0.1165	-0.254822		-0.132358	0.115355
HCC1569	-0.142689	-0.317738	-0.250623		-0.237017	0.0883137
HCC1937	0.0486704	-0.0706694	-0.881785		-0.301261	0.506277
HCC38	-0.216435	-0.529749	-0.212426	-0.641886	-0.400124	0.219259
MDA-MB-157	-0.54489	-0.319535	-0.413415		-0.425947	0.113199
HCC70	-0.612427	-0.299707	-0.615719		-0.509284	0.181507
