# Supplementary material for: PTEN and DNA-PK determine sensitivity and recovery in response to WEE1 inhibition in human breast cancer
Source: eLife. 2020 Jul 6;9:e57894. doi: 10.7554/eLife.57894 (PMC7338058; doi:10.7554/eLife.57894)
Supplement: Figure 2—source data 1. — (C) Correlation analysis of WEE1 RNAi gene dependency (combined RNAi, DEMETER2 model, depmap portal [McFarland et al., 2018; Tsherniak et al., 2017]) and PTEN protein levels (ratio to mean) in 13 breast cancer cell lines. (E) Quantification of recovery of proliferation after 72 hr treatment with 500 nM AZD1775 in isogenic MDA-MB-231 gScrambled and PTEN-KO cell lines. (F) Quantification of DNA damage by HCI analysis of γH2AX-positive cells in the replicating, EdU+ fraction. PTEN-proficient (MDA-MB-231 scrambled control), PTEN-deficient (PTEN-KO #2.3) and PTEN-deleted HCC1937 cells were treated with AZD1775 (500 nM) or DMSO for 24 hr. Proportions of EdU/γH2AX double-positive cells are shown. (G) Quantification of AZD1775 response in HCC1937 (EV, PTEN-negative) cells and HCC1937 cells with reconstituted PTEN (PTEN-positive). Cell viability was analysed by alarmarBlue assay. (H) Recovery of proliferation (10 days) of EV and PTEN restored HCC1937 cells following 72 hr treatment with AZD1775 (100 nM) quantified by crystal violet staining. (Supplement 2E) Quantification of response to WEE1 inhibitor PD0166285 in HCC1937 (EV, PTEN-negative) cells and HCC1937 cells with reconstituted PTEN expression. Cell viability was analysed by alamarBlue assay. (Supplement 3) WEE1 was silenced by siRNA transfection in PTEN-proficient and PTEN-deficient cells (MDA-MD-231) and HCC1937 and cell viability analysed by alamarBlue assay. [file elife-57894-fig2-data1.xlsx]

## Sheet: C
	Mean PTEN prot	WEE1 gene effect
BT20	0.66285	-0.585131
HCC1937	0.47155	-0.395408
HCC70	0.49017	-0.639574
HCC1569	0.53003	-0.609596
CAL51	0.58082	-0.521619
BT549	0.42252	-0.3862
HCC38	0.50012	-1.05515
HCC1143	1.2667	-0.386195
HCC1187	1.14167	-0.316262
T47D	2.07894	-0.218311
MCF7	1.87836	-0.141848
HCC1954	0.97352	-0.0925652
MDAMB157	1.74808	0.219261

## Sheet: E
	gScrambled			PTEN-KO #1.4			PTEN-KO #2.3
	Mean	SD	Replicates	Mean	SD	Replicates	Mean	SD	Replicates
DMSO	100	0	5	100	0	5	100	0	5
AZD1775	53.11	6.6	5	27.43	6.4	5	36.89	5.8	5

## Sheet: F
proportion EdU-γH2AX-positive
	DMSO						AZD1775
Replicate	1	2	3	4	5	6	1	2	3	4	5	6
MDA-MB-231 gSCR	0.03	0.04	0.03	n/a	n/a	n/a	0.1	0.05	0.08	n/a	n/a	n/a
MDA-MB-231PTEN-KO #2.3	0.06	0.07	0.07	n/a	n/a	n/a	0.19	0.18	0.24	n/a	n/a	n/a
HCC1937	0	0.01	0.04	0	0.01	0	0.42	0.19	0.4	0.4	0.3	0.4

## Sheet: G
0h		EV					PTEN
	AZD1775
	0	563.333	564.805	571.544	666.225	639.439	684.852	686.641	680.848	682.905	654.737
	25	578.52	620.749	594.167	667.571	642.725	717.753	741.245	715.563	679.552	656.393
	50	513.127	494.474	501.629	547.64	555.041	680.98	673.363	669.598	658.12	630.942
	100	484.355	536.693	533.007	526.403	511.884	648.903	660.447	669.968	639.965	610.31
	200	500.66	499.153	500.756	511.349	489.924	626.905	617.116	610.351	607.099	568.13
	400	495.587	493.23	489.915	470.895	485.015	586.288	613.788	585.711	591.587	542.682
4h		EV					PTEN
	AZD1775
	0	7970.85	8090.04	8055.91	8379.42	8254.87	8290.31	8141.65	8000.59	7399.45	8138.94
	25	5766.77	5338.43	7358.84	7115.13	7384.43	6827.3	8028.05	5616.11	7895.1	7005.92
	50	6398.61	3970.29	3926.68	5588.87	5228.43	6039.73	5497.58	5266.49	5396.94	7301.71
	100	3959.51	3856.38	3820.19	3771.1	3541.5	5800.94	4558.38	5089.75	6077.52	6877.49
	200	3272.67	3410.32	2915.69	2844.94	2706.94	5075.91	4742.76	5095.1	6045.87	6197.08
	400	2551.23	2676.58	2903.96	2618.13	2846.47	4718.94	5198.15	4906.54	4922.48	5397.2
Background subtraction		EV					PTEN					Mean of 0 AZD1775
	AZD1775											EV	PTEN
	0	7407.52	7525.23	7484.36	7713.2	7615.43	7605.45	7455.01	7319.74	6716.54	7484.2	7549.15	7316.19
	25	5188.25	4717.68	6764.67	6447.56	6741.7	6109.55	7286.81	4900.54	7215.54	6349.52
	50	5885.48	3475.81	3425.05	5041.23	4673.39	5358.75	4824.22	4596.89	4738.82	6670.77
	100	3475.16	3319.69	3287.18	3244.69	3029.62	5152.04	3897.93	4419.78	5437.56	6267.18
	200	2772.01	2911.16	2414.93	2333.59	2217.02	4449.01	4125.64	4484.75	5438.77	5628.95
	400	2055.64	2183.35	2414.04	2147.23	2361.45	4132.65	4584.36	4320.83	4330.9	4854.52
Cell viability		EV					PTEN
	AZD1775
	0	100					100
	25	68.7263	62.4929	89.6084	85.4078	89.3042	83.5073	99.5984	66.9822	98.6243	86.7873
	50	77.9622	46.0425	45.37	66.7787	61.9061	73.2451	65.9389	62.8318	64.7716	91.1782
	100	46.0337	43.9743	43.5437	42.9809	40.1319	70.4197	53.2782	60.411	74.3222	85.6618
	200	36.7195	38.5628	31.9895	30.9119	29.3678	60.8104	56.3906	61.299	74.3389	76.9383
	400	27.2301	28.9218	31.9777	28.4434	31.2811	56.4864	62.6606	59.0584	59.1961	66.3531

## Sheet: H
Experiment #1
Raw data	EV DMSO	EV AZD1775	PTEN DMSO	PTEN AZD1775	Background
	0.3138	0.0759	0.3088	0.08	0.0553833
	0.3504	0.0766	0.3707	0.1208
	0.3873	0.0677	0.3266	0.0905
Background removal
	EV DMSO	EV AZD1775	PTEN DMSO	PTEN AZD1775
	0.258417	0.0205167	0.253417	0.0246167
	0.295017	0.0212167	0.315317	0.0654167
	0.331917	0.0123167	0.271217	0.0351167
Average	0.295117		0.279983
Fold change (realtive to DMSO)	EV	PTEN
	0.0695205	0.0879219
	0.0718925	0.233645
	0.0417349	0.125424
Fold change relative to EV	EV	PTEN
	1	1.26469
	1	3.24992
	1	3.00526
Experiment #2
Raw data	EV DMSO	EV AZD1775	PTEN DMSO	PTEN AZD1775	Background
	0.7254	0.2735	0.4244	0.2363	0.0553833
	0.428	0.2958	0.3143	0.31
	0.8499	0.2804	0.3985	0.2579
Background removal
	EV DMSO	EV AZD1775	PTEN DMSO	PTEN AZD1775
	0.670017	0.218117	0.369017	0.180917
	0.372617	0.240417	0.258917	0.254617
	0.794517	0.225017	0.343117	0.202517
Average	0.612383		0.323683
Fold change (Relative to DMSO)	EV	PTEN
	0.657143	0.667056
	0.724328	0.938794
	0.677931	0.746697
Fold change realative to EV	PTEN
	1.01509
	1.29609
	1.10143

## Sheet: S2E
	Mean PTEN prot	WEE1 gene effect
MCF7	0.633066	-0.141848
KPL1	-0.0903307	-0.223108
HCC1187	0.569139	-0.316262
EFM192A	0.133458	0.124486
T47D	1.75057	-0.218311
CAL120	0.554956	-0.0522929
AU565	0.0675785	-0.251518
BT549	-0.559414	-0.3862
EFM19	-0.294447	-0.132034
HCC1500	1.32227	-0.300124
HCC1143	0.242608	-0.386195
BT20	-0.687356	-0.585131
MDAMB436	-1.09216	-0.568845
MDAMB157	0.431025	0.219261
HCC1806	-0.508858	-0.460194
HCC70	-2.77744	-0.639574
HCC1395	-3.64352	-0.530284
JIMT1	-0.289294	-1.17703
HCC2218	1.66391	-0.033538
MDAMB231	0.61273	-0.67286
CAMA1	0.181158	0.336778
MDAMB468	-0.578219	-0.202853
CAL51	-0.437839	-0.521619
CAL851	-0.390076	-0.260444
HCC1954	0.104369	-0.0925652
MDAMB453	-0.170656	-0.256197

## Sheet: S3
Cell viability	MDA-MB-231
	siSCR			siWEE1
	Mean	SD	Replicates	Mean	SD	Replicates
WT	1	0.210825	4	0.47779	0.061081	4
PTEN-KO #1.1	1	0.115785	4	0.254828	0.052029	4
PTEN-KO #1.4	1	0.088024	4	0.251294	0.081096	4
	HCC1937
	siSCR			siWEE1
	Mean	SD	Replicates	Mean	SD	Replicates
EV	1	0.082557	6	0.36711	0.014284	6
PTEN	1	0.038129	6	0.51	0.024512	6
