# Supplementary material for: PTEN and DNA-PK determine sensitivity and recovery in response to WEE1 inhibition in human breast cancer
Source: eLife. 2020 Jul 6;9:e57894. doi: 10.7554/eLife.57894 (PMC7338058; doi:10.7554/eLife.57894)
Supplement: Figure 3—source data 1. — (E) Quantification of ssDNA foci numbers per nucleus in response to different treatments and durations as indicated. (F) Quantification of γH2AC, RAD51 and 53BP1 (the latter not shown in histograms) positive MDA-MB-231 cells treated with AZD1775 (500 nM), AZD6738 (1 µM) or their combination. (Supplement 1C) Quantification of percentage of cell population in active S-phase (EdU+) from two independent experiments in MDA-MB-231 and BT20 cells. (Supplement 1D) Proportion of senescence associated-β-Galactosidase-positive cells after 72 hr of AZD1775-AZD6738 combination or DMSO control treatment (500 nM AZD1775 and 1 μM AZD6738) and 5 days drug wash-out. [file elife-57894-fig3-data1.xlsx]

## Sheet: E
# ssDNA foci/nucleus
Time [h]	DMSO					AZD1775					AZD6738					AZD1775-6738
2	3.27273	4.07143	4.46154	1.63636	3.5	2.66391	1.10193				7.09091	8.33333	2.71429	3.55556	2.25	15	27.9	16.25	21.7	5.54545
4						10.6154	10.5	9.61905	11.1667	11.1579	10.8889	28.2143	17.2727	7.93333	8.64706	11.1579	18.6471	25.8462	29.15	26.4375
6						7.23529	10.1429	21.8889	16.75	13.7143	14.5714	2.90909	6.52941	10	7.69231	22.5333	25.25	27.1111	21.1538	13.5333
8	7.45455	0.4	7	3.35	6.26667	14.7857	27.0667	7.95833	15.5714	14.1765	8.35714	3.5	6.56522	6	8.64706	17.6364	19.8182	11.75	5.625	13.8461
Series image	1	2	3	4	5	1	2	3	4	5	1	2	3	4	5	1	2	3	4	5

## Sheet: F
				CELL NUMBER PER POPULATION								POPULATION -%
Name / Description	ID1	ID2	Ab (568)	All cells		Double pos		yH2AX pos. Cells		RAD51/53BP1 pos cells		Double pos -%		yH2AX pos-%		RAD51/53BP1 pos-%
				Exp #1	Exp #2	Exp #1	Exp #2	Exp #1	Exp #2	Exp #1	Exp #2	Exp #1	Exp #2	Exp #1	Exp #2	Exp #1	Exp #2
MDA-231_1	24h	DMSO	RAD51	4734	2559	1	0	3	4	1422	820	0.000211238	0	0.000633714	0.00156311	0.30038	0.320438
MDA-231_1	24h	AZD1775	RAD51	3334	3192	256	355	778	1437	1114	993	0.0767846	0.111216	0.233353	0.450188	0.334133	0.31109
MDA-231_1	24h	AZD6738	RAD51	4749	3141	176	49	693	262	1556	1440	0.0370604	0.0156001	0.145925	0.0834129	0.327648	0.458453
MDA-231_1	24h	AZD1775/-6738	RAD51	1946	860	188	67	1390	623	353	109	0.0966084	0.077907	0.714286	0.724419	0.181398	0.126744
MDA-231_1	16h washout	AZD1775	RAD51	6453	3251	528	1033	1445	2635	2951	1287	0.0818224	0.317748	0.223927	0.81052	0.457307	0.395878
MDA-231_1	24h washout	AZD1775	RAD51	6401	3420	280	511	780	1162	2859	1786	0.0437432	0.149415	0.121856	0.339766	0.446649	0.522222
MDA-231_1	16h washout	AZD6738	RAD51	5193	4207	130	114	537	379	3231	2607	0.0250337	0.0270977	0.103408	0.0900879	0.622184	0.619681
MDA-231_1	24h washout	AZD6738	RAD51	5572	4833	85	95	417	231	2775	2910	0.0152548	0.0196565	0.0748385	0.0477964	0.498026	0.60211
MDA-231_1	16h washout	AZD1775/-6738	RAD51	1602	1531	139	116	1128	1141	350	210	0.0867665	0.0757675	0.70412	0.745265	0.218477	0.137165
MDA-231_1	24h washout	AZD1775/-6738	RAD51	2369	747	196	74	1372	520	718	180	0.0827353	0.0990629	0.579147	0.696118	0.303081	0.240964
MDA-231_1	16h washout	AZD1775	53BP1	5729	3465	376	351	1202	1492	3055	1291	0.065631	0.101299	0.20981	0.430592	0.533252	0.372583
MDA-231_1	24h washout	AZD1775	53BP1	5875	2842	389	529	910	1346	3097	1482	0.0662128	0.186137	0.154894	0.47361	0.527149	0.521464
MDA-231_1	16h washout	AZD6738	53BP1	5891	3730	59	52	490	315	3734	2620	0.0100153	0.013941	0.0831777	0.0844504	0.633848	0.702413
MDA-231_1	24h washout	AZD6738	53BP1	5915	4214	65	78	338	345	4223	3150	0.010989	0.0185097	0.0571429	0.08187	0.713948	0.747508
MDA-231_1	16h washout	AZD1775/-6738	53BP1	1985	1782	109	100	1352	1337	482	299	0.0549118	0.0561167	0.681108	0.750281	0.242821	0.167789
MDA-231_1	24h washout	AZD1775/-6738	53BP1	2010	588	128	46	1216	440	631	136	0.0636816	0.0782313	0.604975	0.748299	0.31393	0.231293
				POPULATION -%										POPULATION -%
				Double pos -%			yH2AX pos-%			RAD51/53BP1 pos-%				Double pos -%			yH2AX pos-%			RAD51/53BP1 pos-%
				Exp #1	Exp #2	Exp #3	Exp #1	Exp #2	Exp #3	Exp #1	Exp #2	Exp #3		Exp #1	Exp #2	Exp #3	Exp #1	Exp #2	Exp #3	Exp #1	Exp #2	Exp #3
MDA-231_1	24h	DMSO	RAD51	0.000211238	0	0.0208933	0.000633714	0.00156311	0.0531715	0.30038	0.320438	0.2003		0.000211238	0	0.0208933	0.000422476	0.00156311	0.0322782	0.300169	0.320438	0.179407
MDA-231_1	24h	AZD6738	RAD51	0.0370604	0.0156001	0.0226764	0.145925	0.0834129	0.164194	0.327648	0.458453	0.303331		0.0767846	0.111216	0.157528	0.108865	0.0678128	0.141517	0.290587	0.442853	0.280655
MDA-231_1	16h washout	AZD6738	RAD51	0.0250337	0.0270977	0.0305798	0.103408	0.0900879	0.149993	0.622184	0.619681	0.531756		0.0818224	0.317748	0.195489	0.0783747	0.0629903	0.119413	0.59715	0.592584	0.501176
MDA-231_1	24h washout	AZD6738	RAD51	0.0152548	0.0196565	0.0689455	0.0748385	0.0477964	0.160776	0.498026	0.60211	0.614571		0.0437432	0.149415	0.204574	0.0595836	0.0281399	0.0918308	0.482771	0.582454	0.545626
MDA-231_1	24h	AZD1775	RAD51	0.0767846	0.111216	0.157528	0.233353	0.450188	0.631351	0.334133	0.31109	0.268432		0.0370604	0.0156001	0.0226764	0.156569	0.338972	0.473823	0.257349	0.199875	0.110905
MDA-231_1	16h washout	AZD1775	RAD51	0.0818224	0.317748	0.195489	0.223927	0.81052	0.568103	0.457307	0.395878	0.375072		0.0250337	0.0270977	0.0305798	0.142104	0.492771	0.372614	0.375484	0.0781298	0.179584
MDA-231_1	24h washout	AZD1775	RAD51	0.0437432	0.149415	0.204574	0.121856	0.339766	0.538988	0.446649	0.522222	0.397983		0.0152548	0.0196565	0.0689455	0.0781128	0.190351	0.334414	0.402906	0.372807	0.193409
MDA-231_1	24h	AZD1775/-6738	RAD51	0.0966084	0.077907	0.0678164	0.714286	0.724419	0.813797	0.181398	0.126744	0.0947091		0.0966084	0.077907	0.0678164	0.617677	0.646512	0.745981	0.0847893	0.0488372	0.0268927
MDA-231_1	16h washout	AZD1775/-6738	RAD51	0.0867665	0.0757675	0.0572242	0.70412	0.745265	0.811238	0.218477	0.137165	0.103573		0.0867665	0.0757675	0.0572242	0.617353	0.669497	0.754013	0.13171	0.0613978	0.046349
MDA-231_1	24h washout	AZD1775/-6738	RAD51	0.0827353	0.0990629	0.147523	0.579147	0.696118	0.813063	0.303081	0.240964	0.227477		0.0827353	0.0990629	0.147523	0.496412	0.597055	0.665541	0.220346	0.141901	0.079955
MDA-231_1	16h washout	AZD6738	53BP1	0.0100153	0.013941	0.0463829	0.0831777	0.0844504	0.135459	0.633848	0.702413	0.799051		0.065631	0.101299	0.264605	0.0731625	0.0705094	0.0890763	0.623833	0.688472	0.752668
MDA-231_1	24h washout	AZD6738	53BP1	0.010989	0.0185097	0.0821329	0.0571429	0.08187	0.161486	0.713948	0.747508	0.725929		0.0662128	0.186137	0.302092	0.0461538	0.0633602	0.079353	0.702959	0.728999	0.643796
MDA-231_1	16h washout	AZD1775	53BP1	0.065631	0.101299	0.264605	0.20981	0.430592	0.642639	0.533252	0.372583	0.499011		0.0100153	0.013941	0.0463829	0.144179	0.329293	0.378033	0.467621	0.271284	0.234406
MDA-231_1	24h washout	AZD1775	53BP1	0.0662128	0.186137	0.302092	0.154894	0.47361	0.595188	0.527149	0.521464	0.605649		0.010989	0.0185097	0.0821329	0.0886809	0.287474	0.293096	0.460936	0.335327	0.303556
MDA-231_1	16h washout	AZD1775/-6738	53BP1	0.0549118	0.0561167	0.125331	0.681108	0.750281	0.838697	0.242821	0.167789	0.231352		0.0549118	0.0561167	0.125331	0.626196	0.694164	0.713366	0.187909	0.111672	0.10602
MDA-231_1	24h washout	AZD1775/-6738	53BP1	0.0636816	0.0782313	0.108705	0.604975	0.748299	0.802436	0.31393	0.231293	0.236355		0.0636816	0.0782313	0.108705	0.541294	0.670068	0.69373	0.250249	0.153061	0.12765
																	yH2AX+ only		yH2AX+ /RAD51 (53BP1)		RAD51/53BP1+ only
																	Mean	SD	Mean	SD	Mean	SD
														DMSO	RAD51	24h	0.0114213	0.0180717	0.00703484	0.0120022	0.266671	0.0762495
														AZD6738	RAD51	24h	0.106065	0.036932	0.115176	0.0405171	0.338032	0.0909133
														AZD6738	RAD51	16h washout	0.0869261	0.0291674	0.198353	0.117989	0.563637	0.0541405
														AZD6738	RAD51	24h washout	0.0598514	0.0318463	0.132577	0.0817269	0.53695	0.0504046
														AZD1775	RAD51	24h	0.323121	0.15922	0.0251123	0.0109356	0.189376	0.0737843
														AZD1775	RAD51	16h washout	0.33583	0.178204	0.0275704	0.00280309	0.211066	0.151156
														AZD1775	RAD51	24h washout	0.200959	0.128479	0.034619	0.029809	0.323041	0.113268
														AZD1775/-6738	RAD51	24h	0.670057	0.0673143	0.0807773	0.014609	0.0535064	0.0292293
														AZD1775/-6738	RAD51	16h washout	0.680288	0.0689662	0.0732528	0.0149308	0.0798191	0.0455648
														AZD1775/-6738	RAD51	24h washout	0.586336	0.0850723	0.109774	0.0336955	0.147401	0.070357
														AZD6738	53BP1	16h washout	0.0775827	0.0100417	0.143845	0.106091	0.688324	0.0644178
														AZD6738	53BP1	24h washout	0.0629557	0.0166033	0.184814	0.117945	0.691918	0.0436612
														AZD1775	53BP1	16h washout	0.283835	0.123377	0.0234464	0.0199604	0.324437	0.125364
														AZD1775	53BP1	24h washout	0.223084	0.11643	0.0372106	0.0390852	0.366607	0.0832219
														AZD1775/-6738	53BP1	16h washout	0.677909	0.0458018	0.0787866	0.0403134	0.135201	0.0457344
														AZD1775/-6738	53BP1	24h washout	0.635031	0.0820363	0.0835394	0.0229765	0.176987	0.0647065

## Sheet: S1C
BT20_ 40 hours treatment & washout
EdU	0		24		48		72			0		24		48		72
	Exp #1	Exp #2	Exp #1	Exp #2	Exp #1	Exp #2	Exp #1	Exp #2		Mean	SD	Mean	SD	Mean	SD	Mean	SD
DMSO	30.4	32.1	33.6	32.2	21.7	24.7	30.4	26.1		31.25	1.20208	32.9	0.989949	23.2	2.12132	28.25	3.04056
AZD1775	24.4	22	25.8	20.8	22.8	18.7	34.3	26.4		23.2	1.69706	23.3	3.53553	20.75	2.89914	30.35	5.58614
AZD6738	24.5	25.1	33.2	35.1	22	23.1	31.4	24.5		24.8	0.424264	34.15	1.3435	22.55	0.777817	27.95	4.87904
AZD1775-6738	12.7	18.5	8.9	4.37	11.4	5.32	16.4	4.02		15.6	4.10122	6.635	3.20319	8.36	4.29921	10.21	8.75398
MDA231_ 40 hours treatment & washout
EdU	0	24		48		72				24		48
	Exp #1	Exp #1	Exp #2	Exp #1	Exp #2	Exp #1				Mean	SD	Mean	SD
DMSO	46.8	47.2	44.7	40	44.8	32.2				45.95	1.76777	42.4	3.39411
AZD1775	17.3	25.7	20.8	30.8	29.3	42.4				23.25	3.46482	30.05	1.06066
AZD6738	37.5	25.6	36.7	29.2	29.3	33.1				31.15	7.84889	29.25	0.0707107
AZD1775-6738	8.06	2.79	12.5	3.29	3.85	7.18				7.645	6.86601	3.57	0.39598

## Sheet: S1D
	proportion βGal-positive cells
Replicate	DMSO	AZD1775-6738
1	0.01105	1
2	0.002252	0.6
3	0.043269	1
4	0.026316	0.5
