# Supplementary material for: PTEN and DNA-PK determine sensitivity and recovery in response to WEE1 inhibition in human breast cancer
Source: eLife. 2020 Jul 6;9:e57894. doi: 10.7554/eLife.57894 (PMC7338058; doi:10.7554/eLife.57894)
Supplement: Figure 4—source data 1. — (B) Grouping of different DNA repair pathway-associated genes from high-content siRNA screen based on gene ontologies. (C) Viability matrix based on alamarBlue staining to assess synergy between AZD1775 and NU7441 in MDA-MB-231, HCC1143, HCC1954, BT20 and Cal51 cells. (H) MDA-MB-231 cells were treated with the indicated drugs for 24 or 48 hr and phosphorylation of DNA-PK (pT2609) analysed by high-content immunofluorescence microscopy. The proportions of pT2609-DNAPK-labelled cells are shown. [file elife-57894-fig4-data1.xlsx]

## Sheet: B
GO:0036297 Interstrand crosslink repair	GO:0006303 NHEJ	GO:0006289 Nucleotide excision repair	GO:0000724 HR	GO:0006298 Mismatch repair	GO:0006284 BER
ATR	ABRAXAS1	BRCA2	ACTR2	ABL1	APEX1
ATRIP	ACTR2	CETN2	AP5S1	AXIN2	APEX2
CENPS	ATM	ERCC1	AP5Z1	ERCC1	DNA2
CENPX	ATP23	ERCC2	AUNIP	EXO1	ERCC6
DCLRE1A	AUNIP	ERCC3	BRCA1	HDAC10	FAM168A
DCLRE1B	BABAM1	ERCC4	BRCA2	HMGB1	FEN1
DCLRE1C	BABAM2	ERCC5	CGAS	LIG1	HMGA1
EME1	BLM	ERCC6	CHEK1	MCM9	HMGA2
ERCC1	BRCC3	ERCC8	ERCC4	MLH1	HUWE1
ERCC4	DCLRE1B	FAN1	EXD2	MLH3	LIG1
ERCC6L2	DCLRE1C	GTF2H5	FBH1	MSH2	LIG3
EXO5	DEK	LIG4	FIGNL1	MSH3	M0R2N6
FAAP100	DNTT	NTHL1	FUS	MSH4	MBD4
FAAP20	DTX3L	OGG1	GEN1	MSH5	MPG
FAAP24	ERCC1	POLA1	HELQ	MSH6	MUTYH
FAN1	ERCC4	POLB	INO80	MUTYH	NEIL1
FANCA	H2AFX	POLD1	KDM1A	PCNA	NEIL2
FANCB	HERC2	POLD3	KDM4D	PMS1	NEIL3
FANCC	HIST1H4A	POLE	KLHL15	PMS2	NTHL1
FANCD2	HIST3H3	POLK	MAD2L2	PMS2P1	OGG1
FANCE	HMGA2	POLL	MAGEF1	PMS2P11	PARP2
FANCF	HSF1	RAD23A	MCM8	PMS2P2	POLB
FANCG	KAT5	RAD23B	MCM9	PMS2P3	POLD1
FANCI	KDM4D	RAD52	MMS19	PMS2P5	POLE
FANCL	KU70	RBBP8	MMS22L	POLD1	POLG
FANCM	LIG4	RPA1	MMS22L	POLD2	POLL
MCM8	MAD2L2	RPA2	MORF4L1	POLD3	POLQ
MCM9	MRE11	RPA3	MRE11	POLD4	PRMT6
MSH6	MRNIP	RPA4	MRNIP	PRKCG	RECQL4
MUS81	NBN	SIRT1	NABP2	RNASEH2A	RPA1
NUCKS1	NSD2	SLX4	NSMCE2	RPA1	RPA2
POLN	NSMCE2	TP53	NUCKS1	RPA2	RPA3
RAD51	NUDT16L1	USP7	PALB2	RPA3	RPA4
RAD51AP1	PARP3	UVSSA	PALB2	RPA4	RPS3
RAD51D	PARP9	XAB2	PARP1	SETD2	SIRT6
RFWD3	PAXIP1	XPA	PARPBP	TDG	SMUG1
RNF168	PAXX	XPC	POLN	TP73	TDG
RNF8	PIAS4		POLQ	TREX1	TP53
RPA1	POLA1		PPP4R2	XPC	UNG
RPA2	POLB		PSMD14		USP47
RPA3	POLQ		RAD51AP1		WRN
RPS27A	PRKDC		RAD51B		XPA
SLX1A	PRPF19		RAD51D		XRCC1
SLX4	PSMD14		RAD54B
UBA52	RAD50		RADX
UBB	RIF1		RBBP8
UBC	RNF168		RFWD3
UBE2T	RNF8		RFWD3
USP1	SHLD1		RFWD3
WDR48	SHLD2		RIF1
XPA	SHLD3		RNF138
XRCC3	SMC5		RPA1
	SMCHD1		RPA2
	SUMO1		RPA3
	TFIP11		RTEL1
	TP53BP1		SAMHD1
	UBE2V2		SETD2
	UIMC1		SFPQ
	USP51		SFR1
	UVRAG		SHLD1
	WAS		SHLD2
	XRCC1		SHLD3
	XRCC4		SIRT6
	XRCC5		SLX4
	XRCC6		SMC5
	ZBTB7A		SMCHD1
			SPIDR
			SWI5
			SWSAP1
			TIMELESS
			TP53BP1
			UBE2N
			USP51
			WAS
			WRAP53
			XRCC1
			XRCC2
			XRCC3
			YY1
			ZFYVE26
			ZNF365
			ZSWIM7

## Sheet: C
Plate 1	MDA-MB-231
0h		NU7441
		0	50	100	250	500	1000	2000	2500	5000	10000
AZD 1775	0	786.883	799.989	742.578	792.77	760.648	757.53	629.656	705.229	507.564	439.197
	50	785.414	785.998	824.703	780.802	787.342	716.894	622.731	672.101	521.449	457.425
	250	701.38	733.69	700.113	720.039	717.295	681.892	606.829	598.412	505.504	440.869
	500	641.727	688.294	909.703	668.485	667.27	666.048	631.058	612.693	543.125	442.115
	1000	611.458	618.859	628.186	631.492	606.379	620.494	613.19	574.679	512.485	441.157
	2000	584.939	584.549	612.058	595.486	604.74	609.968	580.241	578.245	556.613	456.385
Plate 1
3h		NU7441
		0	50	100	250	500	1000	2000	2500	5000	10000
AZD 1775	0	8082.08	7844.94	7439.45	7296.32	7080.57	6759.95	6063.79	6679.38	5131.7	3549.22
	50	7599.79	7253.48	7674.57	6581.59	6628.53	6423.56	5627.18	5301.62	4768.28	3342.71
	250	6580.91	6253.33	4596.16	4617.92	5095.45	4085.75	3734.22	4649.52	4029.79	3200.08
	500	5460.56	5257.82	8355.49	4300.99	4697.23	3734.06	3349.46	3970.97	3633.12	2735.58
	1000	4555.55	4264.64	4361.18	4145.25	4210.75	4258.77	3505.48	3496.59	3269.1	2707.86
	2000	4170.42	3930.88	3929.22	3846.54	3934.91	3863.7	3665.45	3650.01	3398.89	2568.49
Plate 1
Background subtraction		NU7441
		0	50	100	250	500	1000	2000	2500	5000	10000
AZD 1775	0	7295.2	7044.95	6696.87	6503.55	6319.92	6002.42	5434.14	5974.15	4624.14	3110.02
	50	6814.37	6467.48	6849.87	5800.79	5841.19	5706.67	5004.45	4629.52	4246.84	2885.29
	250	5879.53	5519.64	3896.05	3897.88	4378.16	3403.85	3127.4	4051.1	3524.29	2759.21
	500	4818.83	4569.52	7445.78	3632.51	4029.96	3068.01	2718.41	3358.27	3089.99	2293.47
	1000	3944.09	3645.78	3733	3513.76	3604.37	3638.28	2892.29	2921.91	2756.62	2266.71
	2000	3585.48	3346.33	3317.16	3251.05	3330.17	3253.73	3085.2	3071.76	2842.28	2112.11
Plate 1
Cell viability		NU7441
		0	50	100	250	500	1000	2000	2500	5000	10000
AZD 1775	0	100	96.5697	91.7984	89.1484	86.6313	82.279	74.4892	81.8915	63.386	42.6311
	50	93.409	88.6539	93.8956	79.5152	80.069	78.225	68.5992	63.4598	58.2141	39.5505
	250	80.5946	75.6613	53.4056	53.4308	60.0143	46.6588	42.8692	55.5311	48.3097	37.8223
	500	66.0548	62.6374	102.064	49.7931	55.2413	42.0552	37.2629	46.034	42.3565	31.4381
	1000	54.0643	49.9751	51.1706	48.1653	49.4075	49.8722	39.6465	40.0525	37.7867	31.0712
	2000	49.1485	45.8703	45.4705	44.5643	45.6489	44.601	42.2909	42.1066	38.9609	28.952
Plate 2
0h		NU7441
		0	50	100	250	500	1000	2000	2500	5000	10000
AZD 1775	0	812.884	670.178	758.919	759.928	683.217	770.658	676.186	676.814	602.7	525.747
	50	749.619	660.513	588.805	823.873	699.079	753.249	703.395	668.376	623.847	519.485
	250	712.032	601.341	639.934	700.359	649.153	677.553	646.351	636.947	605.044	481.451
	500	649.75	619.919	635.997	664.006	666.145	670.743	643.314	611.625	583.385	482.602
	1000	618.38	571.181	613.665	631.094	602.312	620.733	621.761	589.979	558.397	486.929
	2000	592.812	578.859	625.776	616.827	629.827	601.384	605.674	581.293	548.419	461.344
Plate 2
3h		NU7441
		0	50	100	250	500	1000	2000	2500	5000	10000
AZD 1775	0	7659.96	6791.3	6811.2	6716.76	6522.5	6846.12	6448.28	6406.98	4737.62	3896.65
	50	6521.2	5686.96	4718.78	5857.31	4919.25	6437.27	5928.73	5742.11	4804.47	3557.72
	250	6330.98	4374.73	4368.85	3921.28	3957.4	4098.54	3991.08	4938.3	4141.26	3217.02
	500	5051.71	4930.84	4844.71	4259.59	3645.69	4345.51	4368.12	3370.46	3752.72	3047.73
	1000	4053.89	4251.6	4182.51	3844.67	3447.92	3897.18	4269.86	3926.61	3664.29	2911.49
	2000	3804.91	3601.86	3875.25	3896.93	3910.82	3828.08	3926.82	3777.73	3378.82	2789.7
Plate 2
Background subtraction		NU7441
		0	50	100	250	500	1000	2000	2500	5000	10000
AZD 1775	0	6847.08	6121.13	6052.28	5956.83	5839.28	6075.47	5772.1	5730.16	4134.92	3370.9
	50	5771.59	5026.45	4129.97	5033.44	4220.17	5684.03	5225.33	5073.74	4180.62	3038.23
	250	5618.95	3773.39	3728.92	3220.92	3308.24	3420.99	3344.73	4301.35	3536.22	2735.57
	500	4401.96	4310.92	4208.71	3595.59	2979.55	3674.77	3724.8	2758.83	3169.34	2565.13
	1000	3435.51	3680.42	3568.85	3213.57	2845.61	3276.44	3648.1	3336.63	3105.89	2424.56
	2000	3212.1	3023	3249.47	3280.1	3280.99	3226.7	3321.14	3196.44	2830.4	2328.35
Plate 2
Cell viability		NU7441
		0	50	100	250	500	1000	2000	2500	5000	10000
AZD 1775	0	100	89.3976	88.3922	86.9981	85.2813	88.7308	84.3001	83.6877	60.3895	49.2312
	50	84.2927	73.4101	60.3173	73.5122	61.6346	83.0139	76.3147	74.1008	61.057	44.3727
	250	82.0635	55.1095	54.4599	47.0408	48.3161	49.9628	48.849	62.8202	51.6457	39.9524
	500	64.2896	62.96	61.4673	52.5127	43.5156	53.6692	54.3999	40.2921	46.2875	37.4631
	1000	50.1748	53.7516	52.1222	46.9335	41.5595	47.8517	53.2797	48.7307	45.3608	35.4101
	2000	46.9119	44.1502	47.4578	47.9052	47.9181	47.1251	48.5045	46.6833	41.3373	34.005
Plate 2
Average		NU7441
		0	50	100	250	500	1000	2000	2500	5000	10000
AZD 1775	0	100	92.9836	90.0953	88.0732	85.9563	85.5049	79.3947	82.7896	61.8878	45.9311
	50	88.8508	81.032	77.1065	76.5137	70.8518	80.6194	72.457	68.7803	59.6356	41.9616
	250	81.329	65.3854	53.9328	50.2358	54.1652	48.3108	45.8591	59.1757	49.9777	38.8873
	500	65.1722	62.7987	61.4673	51.1529	49.3784	47.8622	45.8314	43.1631	44.322	34.4506
	1000	52.1195	51.8633	51.6464	47.5494	45.4835	48.862	46.4631	44.3916	41.5738	33.2407
	2000	48.0302	45.0102	46.4641	46.2347	46.7835	45.863	45.3977	44.395	40.1491	31.4785
Plate 1	HCC1143
0h		NU7441
		0	50	100	250	500	1000	2000	2500	5000	10000
AZD 1775	0	575.217	549.657	523.664	619.224	544.556	519.217	504.42	533.714	447.837	396.512
	50	538.346	537.15	612.783	562.607	514.237	529.393	488.462	595.14	476.04	403.735
	250	519.658	503.824	566.866	535.698	508.477	519.161	507.308	522.028	462.172	382.632
	500	561.73	527.83	568.66	548.448	497.211	512.28	499.154	525.322	431.803	404.624
	1000	532.97	515.644	532.425	539.524	498.708	490.219	477.45	484.238	405.239	386.717
	2000	503.195	510.824	517.017	504.081	481.511	480.653	481.805	463.011	385.398	396.867
Plate 1
4h		NU7441
		0	50	100	250	500	1000	2000	2500	5000	10000
AZD 1775	0	5057.31	4696.08	4657.71	4762.73	4481.65	4376.45	3946.51	3821.41	3115.88	2376.39
	50	4805.99	4585.9	4474.91	4439.84	4223.02	3936.42	3674.7	3700.86	2981.68	2153.95
	250	4190.68	4083.26	3888.77	3780.14	3514.54	3230.58	3101.51	2988.65	2496.36	1728.94
	500	4082.04	3784.49	3760.64	3628.27	3329.33	2667.32	3022.75	2954.14	2286.48	1636.09
	1000	3585.79	3379.89	3336.34	3261.14	3180.98	2963.26	2876.7	2683.36	1914.74	1470.63
	2000	2560.57	2416.35	2421.77	2430.53	2272.15	2544.9	2231.03	2037.08	1591.41	1328.5
Plate 1
Background subtraction		NU7441
		0	50	100	250	500	1000	2000	2500	5000	10000
AZD 1775	0	4482.1	4146.43	4134.05	4143.51	3937.09	3857.24	3442.09	3287.7	2668.05	1979.88
	50	4267.64	4048.75	3862.12	3877.23	3708.79	3407.03	3186.24	3105.72	2505.64	1750.22
	250	3671.02	3579.43	3321.9	3244.45	3006.07	2711.42	2594.2	2466.62	2034.18	1346.31
	500	3520.31	3256.66	3191.98	3079.82	2832.12	2155.04	2523.59	2428.82	1854.68	1231.46
	1000	3052.82	2864.25	2803.92	2721.61	2682.27	2473.04	2399.25	2199.12	1509.5	1083.91
	2000	2057.38	1905.52	1904.75	1926.45	1790.64	2064.25	1749.22	1574.07	1206.01	931.631
Plate 1
Cell viability		NU7441
		0	50	100	250	500	1000	2000	2500	5000	10000
AZD 1775	0	61.439	56.8378	56.6681	56.7978	53.9683	52.8736	47.1829	45.0666	36.5726	27.1394
	50	58.4993	55.4988	52.9406	53.1477	50.8387	46.7023	43.6759	42.5721	34.3465	23.9914
	250	50.3211	49.0656	45.5355	44.4737	41.2061	37.1672	35.5604	33.8116	27.8839	18.4548
	500	48.2551	44.6411	43.7545	42.2171	38.8217	29.5405	34.5925	33.2934	25.4232	16.8805
	1000	41.847	39.2621	38.4351	37.3069	36.7677	33.8996	32.8881	30.1448	20.6917	14.8579
	2000	28.2018	26.1202	26.1097	26.4071	24.5455	28.296	23.9777	21.5767	16.5316	12.7705
Plate 2
0h		NU7441
		0	50	100	250	500	1000	2000	2500	5000	10000
AZD 1775	0	585.583	665.026	751.668	627.49	630.311	605.112	620.516	561.569	507.101	451.278
	50	654.604	702.111	674.274	588.378	662.768	664.074	628.787	642.07	558.155	452.872
	250	629.289	672.333	635.002	623.349	620.811	627.603	630.227	562.511	530.289	430.034
	500	627.262	629.451	579.008	568.501	614.804	617.092	571.908	527.715	491.901	420.832
	1000	588.576	611.471	604.214	572.507	595.265	611.131	572.244	495.121	468.448	415.449
	2000	515.664	545.987	535.386	533.749	528.626	524.107	511.872	472.831	452.944	401.148
Plate 2
4h		NU7441
		0	50	100	250	500	1000	2000	2500	5000	10000
AZD 1775	0	4720.63	4747.65	4657.03	4416.01	4403.88	4204.01	3867.71	3269.99	2709.57	2325.1
	50	4612.89	4640.67	4342.1	3831.35	3724.69	4068.34	3241.4	3284.93	2772.69	1924.9
	250	3920.22	3954.15	3637.12	3590.77	2776.9	3020.76	2739.63	2280.85	2183.91	1448.97
	500	3616.3	3572.95	3279.55	3196.5	2976.82	2445.89	2285.12	2314.36	2085.36	1365.43
	1000	3251.87	3151.13	3031.4	2900.76	2879.24	2900.05	2400.17	2093.97	1753.38	1405.48
	2000	2415.34	2411.46	2233.8	2217.56	2223.78	2125.77	1987.02	1829.81	1479.12	1057.92
Plate 2
Background subtraction		NU7441
		0	50	100	250	500	1000	2000	2500	5000	10000
AZD 1775	0	4135.05	4082.62	3905.36	3788.52	3773.57	3598.9	3247.19	2708.42	2202.47	1873.82
	50	3958.29	3938.56	3667.82	3242.97	3061.92	3404.26	2612.62	2642.86	2214.54	1472.03
	250	3290.93	3281.82	3002.12	2967.42	2156.09	2393.16	2109.4	1718.34	1653.62	1018.94
	500	2989.04	2943.49	2700.54	2628	2362.01	1828.8	1713.22	1786.65	1593.46	944.603
	1000	2663.29	2539.66	2427.19	2328.25	2283.98	2288.92	1827.93	1598.85	1284.93	990.036
	2000	1899.67	1865.47	1698.41	1683.81	1695.15	1601.66	1475.15	1356.98	1026.18	656.773
Plate 2
Cell viability		NU7441
		0	50	100	250	500	1000	2000	2500	5000	10000
AZD 1775	0	60.3915	59.6258	57.0368	55.3305	55.1121	52.561	47.4245	39.5559	32.1666	27.3667
	50	57.8099	57.5217	53.5677	47.3628	44.7187	49.7185	38.1567	38.5984	32.3428	21.4987
	250	48.0632	47.9302	43.8453	43.3384	31.4892	34.9515	30.8073	25.0959	24.1507	14.8814
	500	43.6542	42.9891	39.4408	38.3813	34.4967	26.7091	25.0211	26.0936	23.2721	13.7957
	1000	38.8968	37.0912	35.4485	34.0036	33.357	33.4291	26.6964	23.3509	18.7661	14.4592
	2000	27.7443	27.2448	24.805	24.5917	24.7573	23.3919	21.5442	19.8184	14.9871	9.59202
Plate 2
Average		NU7441
		0	50	100	250	500	1000	2000	2500	5000	10000
AZD 1775	0	60.9152	58.2318	56.8525	56.0641	54.5402	52.7173	47.3037	42.3113	34.3696	27.2531
	50	58.1546	56.5102	53.2542	50.2553	47.7787	48.2104	40.9163	40.5852	33.3446	22.745
	250	49.1922	48.4979	44.6904	43.9061	36.3476	36.0594	33.1839	29.4537	26.0173	16.6681
	500	45.9546	43.8151	41.5977	40.2992	36.6592	28.1248	29.8068	29.6935	24.3477	15.3381
	1000	40.3719	38.1766	36.9418	35.6552	35.0623	33.6643	29.7922	26.7479	19.7289	14.6586
	2000	27.973	26.6825	25.4573	25.4994	24.6514	25.8439	22.761	20.6975	15.7594	11.1812
Plate 1	HCC1954
0h		NU7441
		0	50	100	250	500	1000	2000	2500	5000	10000
AZD 1775	0	559.21	664.063	623.903	579.083	571.461	669.334	688.537	739.498	624.591	470.335
	50	597.872	731.658	693.32	578.656	610.806	692.026	664.073	677.946	614.873	462.599
	250	602.088	631.134	588.67	545.871	573.491	689.965	622.023	616.437	582.068	442.944
	500	633.644	614.13	595.86	584.456	559.424	608.915	622.37	628.28	548.369	450.918
	1000	582.565	591.683	609.248	556.807	576.171	566.499	582.646	569.926	501.233	446.114
	2000	564.363	524.662	510.403	510.946	532.889	510.609	525.727	524.069	479.661	445.942
Plate 1
4h		NU7441
		0	50	100	250	500	1000	2000	2500	5000	10000
AZD 1775	0	5344.64	5300.94	5280.08	5184.23	4762.65	4766.49	4311.22	4451.79	3800.18	2286.6
	50	5169.54	5114.9	5125	4325.66	4935	3237.9	3054.39	3631.39	3542.38	2117.45
	250	4462.51	4209.21	4242.99	3398.15	3193.44	3142.47	2253.92	2523.24	2395	1759.6
	500	4603.5	4067.13	4067.78	2313.51	2502	2628.93	2819.26	2916.54	2916.4	1686.96
	1000	3884.34	3569.94	3619.1	3564.01	3531.22	3222.62	3180.16	2813.06	2228.29	1486.32
	2000	2937.89	2626.64	2735.84	2597.46	2525.59	2539.17	2303.39	2213.75	1780.54	1336.13
Plate 1
Background subtraction		NU7441
		0	50	100	250	500	1000	2000	2500	5000	10000
AZD 1775	0	4785.43	4636.87	4656.18	4605.15	4191.19	4097.15	3622.69	3712.3	3175.59	1816.27
	50	4571.67	4383.25	4431.68	3747.01	4324.19	2545.88	2390.32	2953.45	2927.51	1654.86
	250	3860.42	3578.08	3654.32	2852.28	2619.95	2452.5	1631.9	1906.8	1812.94	1316.65
	500	3969.86	3453	3471.92	1729.06	1942.57	2020.02	2196.89	2288.26	2368.03	1236.04
	1000	3301.78	2978.26	3009.85	3007.2	2955.05	2656.12	2597.51	2243.13	1727.06	1040.2
	2000	2373.53	2101.98	2225.44	2086.52	1992.7	2028.56	1777.67	1689.68	1300.88	890.191
Plate 1
Cell viability		NU7441
		0	50	100	250	500	1000	2000	2500	5000	10000
AZD 1775	0	65.5969	63.5606	63.8253	63.1257	57.4514	56.1623	49.6585	50.8868	43.5298	24.8968
	50	62.6668	60.084	60.7479	51.3627	59.2745	34.898	32.7657	40.4848	40.1292	22.6842
	250	52.9173	49.047	50.0922	39.098	35.9133	33.6181	22.3695	26.1378	24.8511	18.0482
	500	54.4174	47.3325	47.5918	23.7013	26.6281	27.6897	30.1141	31.3666	32.4602	16.9432
	1000	45.2596	40.8249	41.258	41.2216	40.5068	36.4092	35.6058	30.748	23.6739	14.2587
	2000	32.5355	28.8132	30.5055	28.6013	27.3152	27.8068	24.3676	23.1616	17.832	12.2024
Plate 2
0h		NU7441
		0	50	100	250	500	1000	2000	2500	5000	10000
AZD 1775	0	642.113	678.928	683.695	715.656	899.929	570.895	602.635	711.558	586.235	490.44
	50	582.214	695.309	680.527	661.802	802.739	593.454	614.098	667.385	569.136	487.43
	250	590.531	567.02	625.405	649.29	720.367	558.124	598.548	633.461	537.067	491.765
	500	592.262	577.6	576.029	670.919	732.165	607.336	573.36	604.809	543.811	460.839
	1000	553.76	550.216	597.971	624.636	635.484	536.452	561.837	564.474	493.883	483.899
	2000	516.327	515.492	569.621	548.473	572.863	520.547	487.309	468.54	441.319	441.858
Plate 2
4h		NU7441
		0	50	100	250	500	1000	2000	2500	5000	10000
AZD 1775	0	5475.68	5382.2	5222.08	5333.47	5535.92	4967.92	4551.74	4232.02	3095.9	2807.74
	50	5375.04	5144.58	5089.96	5004.35	5122.88	4516.86	4115.97	3767.68	3130.18	2572.07
	250	4784.25	4424.86	4433.05	3864.87	4078.25	2702.87	3129.62	2939.62	2483.77	2158.65
	500	4524.61	4126.69	3761.02	3458.77	3504.12	2708.94	2482.36	3017.69	2402.95	2070.83
	1000	3653.09	3485.59	3707.94	3604.07	3458.47	2589.02	2622.73	2375.21	1759.01	1943.03
	2000	2701.42	2515.89	2855.3	2633.62	2441.33	2387.79	1843.28	1843.68	1430.03	1611.3
Plate 2
Background subtraction		NU7441
		0	50	100	250	500	1000	2000	2500	5000	10000
AZD 1775	0	4833.56	4703.27	4538.39	4617.82	4635.99	4397.02	3949.11	3520.46	2509.66	2317.3
	50	4792.82	4449.27	4409.43	4342.55	4320.14	3923.41	3501.88	3100.29	2561.05	2084.64
	250	4193.72	3857.84	3807.64	3215.58	3357.88	2144.74	2531.07	2306.16	1946.7	1666.88
	500	3932.35	3549.09	3184.99	2787.85	2771.95	2101.6	1908.99	2412.89	1859.14	1609.99
	1000	3099.33	2935.38	3109.97	2979.44	2822.98	2052.57	2060.89	1810.74	1265.13	1459.13
	2000	2185.09	2000.4	2285.67	2085.14	1868.46	1867.24	1355.97	1375.14	988.706	1169.44
Plate 2
Cell viability		NU7441
		0	50	100	250	500	1000	2000	2500	5000	10000
AZD 1775	0	70.5931	68.6902	66.2821	67.4421	67.7075	64.2175	57.6758	51.4155	36.6531	33.8436
	50	69.998	64.9806	64.3987	63.4219	63.0947	57.3005	51.1441	45.2791	37.4035	30.4457
	250	61.2483	56.3429	55.6097	46.9628	49.0411	31.3235	36.9657	33.6809	28.4311	24.3444
	500	57.4311	51.8337	46.516	40.7159	40.4838	30.6934	27.8804	35.2396	27.1523	23.5135
	1000	45.265	42.8705	45.4204	43.514	41.229	29.9773	30.0989	26.4454	18.4769	21.3102
	2000	31.9128	29.2153	33.3817	30.453	27.2885	27.2706	19.8036	20.0836	14.4398	17.0795
Plate 2
Average		NU7441
		0	50	100	250	500	1000	2000	2500	5000	10000
AZD 1775	0	68.095	66.1254	65.0537	65.2839	62.5795	60.1899	53.6671	51.1512	40.0914	29.3702
	50	66.3324	62.5323	62.5733	57.3923	61.1846	46.0992	41.9549	42.8819	38.7664	26.5649
	250	57.0828	52.695	52.8509	43.0304	42.4772	32.4708	29.6676	29.9094	26.6411	21.1963
	500	55.9243	49.5831	47.0539	32.2086	33.5559	29.1915	28.9973	33.3031	29.8062	20.2283
	1000	45.2623	41.8477	43.3392	42.3678	40.8679	33.1933	32.8523	28.5967	21.0754	17.7845
	2000	32.2241	29.0143	31.9436	29.5271	27.3019	27.5387	22.0856	21.6226	16.1359	14.6409
Plate 1	BT20
0h		NU7441
		0	50	100	250	500	1000	2000	2500	5000	10000
AZD 1775	0	713.881	718.5	1098.51	991.592	909.968	834.98	821.184	929.644	699.996	507.495
	50	844.761	856.45	994.859	945.898	857.394	802.304	758.365	782.397	736.884	528.483
	250	799.142	968.579	940.517	919.49	848.219	767.451	714.255	808.41	733.754	515.962
	500	817.502	912.577	864.542	835.893	746.739	728.864	687.497	735.201	698.268	503.331
	1000	679.361	701.063	692.978	655.119	658.446	608.301	587.715	616.324	622.976	466.069
	2000	528.915	581.407	553.058	528.783	550.037	533.676	486.94	499.607	518.17	428.162
Plate 1
4h		NU7441
		0	50	100	250	500	1000	2000	2500	5000	10000
AZD 1775	0	8172.5	8172.59	8608.8	8636.33	8620.8	7889.65	7836.35	7968.53	7320.83	4440.39
	50	8287.56	8266.41	8349.75	8092.6	8272.78	7449.11	7387.67	7513.52	7068.77	4287.61
	250	8078.1	7870.56	7843.26	5755.99	7195.51	6244.88	6090.21	6850.13	5987.76	4066.53
	500	7466.44	7471.3	6934.76	4860.22	6170.68	4380.46	4647.69	5994.83	5527.18	3486.66
	1000	5514.35	5724.62	5197.66	4664.56	5301.32	4560.38	4493.76	4330.83	4541.54	3132.18
	2000	2899.76	4149.15	3014.73	2953.5	3522.6	3147.87	3466.2	3467.42	3601.6	2802.25
Plate 1
Background subtraction		NU7441
		0	50	100	250	500	1000	2000	2500	5000	10000
AZD 1775	0	7458.62	7454.09	7510.29	7644.74	7710.83	7054.67	7015.17	7038.89	6620.83	3932.89
	50	7442.8	7409.96	7354.89	7146.7	7415.39	6646.8	6629.3	6731.12	6331.89	3759.13
	250	7278.96	6901.98	6902.74	4836.5	6347.29	5477.43	5375.96	6041.72	5254.01	3550.57
	500	6648.94	6558.72	6070.21	4024.33	5423.94	3651.6	3960.2	5259.63	4828.91	2983.33
	1000	4834.98	5023.56	4504.68	4009.44	4642.87	3952.08	3906.05	3714.5	3918.56	2666.11
	2000	2370.85	3567.74	2461.67	2424.72	2972.57	2614.2	2979.26	2967.81	3083.43	2374.09
Plate 1
Cell viability		NU7441
		0	50	100	250	500	1000	2000	2500	5000	10000
AZD 1775	0	102.24	102.178	102.948	104.791	105.697	96.7029	96.1614	96.4866	90.756	53.9107
	50	102.023	101.573	100.818	97.9645	101.648	91.112	90.8722	92.2678	86.7953	51.5288
	250	99.7775	94.6099	94.6203	66.297	87.0065	75.0827	73.6917	82.8177	72.0201	48.67
	500	91.1413	89.9047	83.2083	55.1641	74.3494	50.0548	54.285	72.0972	66.193	40.8945
	1000	66.2763	68.8611	61.7485	54.96	63.6428	54.1738	53.5427	50.9171	53.7142	36.5461
	2000	32.4987	48.9053	33.7437	33.2372	40.7469	35.8345	40.8387	40.6817	42.2666	32.5432
Plate 2
0h		NU7441
		0	50	100	250	500	1000	2000	2500	5000	10000
AZD 1775	0	841.442	957.798	905.54	912.376	1035.61	755.621	768.745	791.98	640.308	515.666
	50	905.651	867.101	925.097	825.385	964.128	879.189	800.92	778.588	626.291	536.419
	250	894.703	747.877	981.733	790.222	824.836	906.377	827.411	743.504	627.579	546.73
	500	904.147	707.923	831.596	776.956	844.836	745.506	752.681	697.56	671.265	530.472
	1000	773.163	622.371	718.683	630.683	685.864	610.179	637.719	564.944	593.469	505.289
	2000	566.814	631.388	585.195	573.84	562.088	532.131	565.534	560.728	511.063	428.204
Plate 2
4h		NU7441
		0	50	100	250	500	1000	2000	2500	5000	10000
AZD 1775	0	8777.35	8792.19	8648.02	8518.99	8491.95	8101.06	7758.1	7615.73	6936.04	4513.92
	50	8604.83	8310.62	8176.84	6999.35	7534.84	7246.6	6335.6	6498.35	6462.81	4527.26
	250	8081.28	7752.21	7484.36	4654.03	4596.04	5205.65	5543.57	4770.92	5840.94	4160.14
	500	7603.38	7008.15	5906.28	4555.46	4418.84	3926.66	4377.18	4260.79	5550.65	3912.78
	1000	6400.52	5794.15	5708.96	4477.59	5133.72	4425.17	4281.29	4022.95	4651.43	3470.68
	2000	4627.05	4515.5	4603.84	4220.73	4239.16	3697.55	3800.72	3585.51	3653.56	2885.88
Plate 2
Background subtraction		NU7441
		0	50	100	250	500	1000	2000	2500	5000	10000
AZD 1775	0	7935.91	7834.39	7742.48	7606.62	7456.33	7345.44	6989.36	6823.75	6295.73	3998.25
	50	7699.18	7443.52	7251.74	6173.96	6570.72	6367.41	5534.68	5719.76	5836.52	3990.84
	250	7186.57	7004.33	6502.63	3863.81	3771.2	4299.28	4716.16	4027.41	5213.36	3613.41
	500	6699.23	6300.23	5074.68	3778.51	3574.01	3181.15	3624.5	3563.23	4879.38	3382.31
	1000	5627.36	5171.78	4990.28	3846.91	4447.85	3814.99	3643.57	3458	4057.96	2965.4
	2000	4060.24	3884.11	4018.65	3646.89	3677.07	3165.42	3235.19	3024.78	3142.5	2457.68
Plate 2
Cell viability		NU7441
		0	50	100	250	500	1000	2000	2500	5000	10000
AZD 1775	0	115.902	114.419	113.077	111.093	108.898	107.278	102.078	99.6592	91.9477	58.3935
	50	112.445	108.711	105.91	90.1693	95.9638	92.9945	80.8328	83.5358	85.241	58.2853
	250	104.958	102.297	94.9694	56.4301	55.0776	62.7899	68.8784	58.8195	76.14	52.773
	500	97.8407	92.0134	74.1146	55.1842	52.1975	46.46	52.935	52.0401	71.2622	49.3978
	1000	82.1863	75.5326	72.8819	56.1832	64.9599	55.7171	53.2135	50.5033	59.2656	43.3089
	2000	59.2988	56.7266	58.6914	53.262	53.7028	46.2302	47.2492	44.1762	45.8955	35.8938
Plate 2
Average		NU7441
		0	50	100	250	500	1000	2000	2500	5000	10000
AZD 1775	0	109.071	108.299	108.013	107.942	107.298	101.991	99.1197	98.0729	91.3519	56.1521
	50	107.234	105.142	103.364	94.0669	98.8057	92.0533	85.8525	87.9018	86.0182	54.9071
	250	102.368	98.4533	94.7949	61.3635	71.042	68.9363	71.2851	70.8186	74.08	50.7215
	500	94.491	90.959	78.6615	55.1742	63.2735	48.2574	53.61	62.0686	68.7276	45.1461
	1000	74.2313	72.1969	67.3152	55.5716	64.3013	54.9454	53.3781	50.7102	56.4899	39.9275
	2000	45.8988	52.8159	46.2176	43.2496	47.2248	41.0324	44.0439	42.4289	44.081	34.2185
Plate 1	CAL51
0h		NU7441
		0	50	100	250	500	1000	2000	2500	5000	10000
AZD 1775	0	664.848	647.107	676.53	605.492	660.825	657.664	641.172	533.364	570.127	484.249
	50	670.292	699.262	626.127	657.312	649.256	661.237	660.624	528.059	571.672	502.536
	250	633.848	618.278	662.931	579.979	635.751	611.567	600.965	522.144	547.252	478.622
	500	621.062	646.807	658.068	575.258	575.383	593.444	580.121	524.445	552.326	483.181
	1000	568.146	550.569	579.437	520.107	509.108	535.622	532.355	498.603	527.056	463.422
	2000	514.447	531.883	515.755	496.407	527.74	510.087	523.9	500.152	498.015	442.797
Plate 1
4h		NU7441
		0	50	100	250	500	1000	2000	2500	5000	10000
AZD 1775	0	6419.23	6103.41	5951.55	6005.42	5771.31	5628.9	4936.22	4827.42	4503.97	3481.22
	50	6209.65	5746.23	5598.37	5956.78	5536.55	5692.8	4860.24	4738.79	4443.07	3575.05
	250	6002.67	5294.08	5221.08	3945.05	3732.08	3452.32	3323.52	3657.23	3237.39	2716.25
	500	5389.08	5151.52	4937.69	4294.35	3397.12	3251.51	3212.68	2966.29	3122.86	2383.45
	1000	3569.05	3240.55	3347.2	3003.96	2866.44	2494.24	2642.86	2412.97	2597.97	2060.38
	2000	2503.61	2533.16	2440.66	2508.11	2422.1	2315.09	2289.49	2248.86	2210.47	1787.37
Plate 1
Background subtraction		NU7441
		0	50	100	250	500	1000	2000	2500	5000	10000
AZD 1775	0	5754.38	5456.31	5275.02	5399.93	5110.49	4971.23	4295.05	4294.06	3933.85	2996.98
	50	5539.36	5046.96	4972.24	5299.47	4887.29	5031.56	4199.61	4210.73	3871.39	3072.51
	250	5368.82	4675.8	4558.15	3365.07	3096.33	2840.76	2722.56	3135.09	2690.14	2237.63
	500	4768.02	4504.71	4279.62	3719.09	2821.74	2658.07	2632.56	2441.85	2570.54	1900.27
	1000	3000.91	2689.99	2767.76	2483.86	2357.33	1958.62	2110.51	1914.37	2070.91	1596.96
	2000	1989.16	2001.28	1924.9	2011.71	1894.36	1805	1765.59	1748.71	1712.45	1344.58
Plate 1
Cell viability		NU7441
		0	50	100	250	500	1000	2000	2500	5000	10000
AZD 1775	0	78.879	74.7931	72.3081	74.0203	70.0527	68.1439	58.875	58.8614	53.9238	41.0815
	50	75.9316	69.182	68.1578	72.6432	66.9933	68.9709	57.5668	57.7193	53.0677	42.1169
	250	73.5939	64.0943	62.4815	46.1272	42.4434	38.9401	37.3198	42.9747	36.8754	30.6726
	500	65.3583	61.749	58.6635	50.9799	38.6794	36.4359	36.0862	33.472	35.236	26.0483
	1000	41.1354	36.8734	37.9395	34.0478	32.3135	26.848	28.9301	26.2415	28.3874	21.8905
	2000	27.2667	27.4329	26.3859	27.5758	25.9673	24.7423	24.2021	23.9707	23.4737	18.431
Plate 2
0h		NU7441
		0	50	100	250	500	1000	2000	2500	5000	10000
AZD 1775	0	529.78	621.973	568.425	576.836	547.38	543.719	605.995	600.973	560.645	445.08
	50	585.664	603.58	567.935	688.197	594.374	558.095	598.899	580.504	557.983	433.089
	250	537.667	627.792	550.527	627.024	581.427	538.367	554.62	536.695	514.676	421.232
	500	580.172	614.721	620.569	604.594	574.403	532.867	580.338	546.353	517.33	425.528
	1000	512.197	558.295	531.717	555.159	517.018	515.139	530.442	518.621	504.354	435.161
	2000	482.75	513.89	495.183	498.768	479.075	468.012	495.784	462.154	455.24	402.376
Plate 2
4h		NU7441
		0	50	100	250	500	1000	2000	2500	5000	10000
AZD 1775	0	5374.25	5329.1	5427.86	5335.32	5488.71	5297.84	4822.55	4671.3	4196.65	3184.24
	50	4627.17	5050.2	4166.53	5300.72	5070.66	5310.96	4959.15	4549.38	4359.29	3298.78
	250	5214.59	5193.86	4570.55	4086.64	4330.79	3203.87	3241.92	3012.82	3216.7	2309.27
	500	4930.49	4796.84	5003.13	4576.6	3641.51	3111.68	3069.29	3032.77	2982.4	2174.36
	1000	3279.22	3244.71	3201.25	3234.66	2844.64	2409.08	2508.27	2444.66	2323.19	1946.47
	2000	2577.16	2539.61	2481.07	2436.04	2358.27	2226.01	2193	2116.79	1983.6	1647.59
Plate 2
Background subtraction		NU7441
		0	50	100	250	500	1000	2000	2500	5000	10000
AZD 1775	0	4844.47	4707.13	4859.43	4758.48	4941.33	4754.12	4216.55	4070.33	3636	2739.16
	50	4041.51	4446.62	3598.59	4612.52	4476.28	4752.87	4360.25	3968.87	3801.3	2865.7
	250	4676.92	4566.07	4020.02	3459.61	3749.37	2665.51	2687.3	2476.12	2702.02	1888.04
	500	4350.32	4182.12	4382.56	3972	3067.11	2578.81	2488.95	2486.41	2465.07	1748.84
	1000	2767.02	2686.41	2669.53	2679.5	2327.62	1893.94	1977.82	1926.04	1818.84	1511.31
	2000	2094.41	2025.72	1985.89	1937.27	1879.2	1758	1697.22	1654.64	1528.36	1245.22
Plate 2
Cell viability		NU7441
		0	50	100	250	500	1000	2000	2500	5000	10000
AZD 1775	0	70.7523	68.7465	70.9709	69.4966	72.167	69.4328	61.5817	59.4462	53.1029	40.0048
	50	59.0252	64.9419	52.5566	67.3648	65.3751	69.4145	63.6805	57.9645	55.5172	41.8528
	250	68.3054	66.6863	58.7114	50.5269	54.7586	38.9291	39.2474	36.1632	39.4624	27.5744
	500	63.5354	61.0789	64.0063	58.0101	44.7945	37.6629	36.3505	36.3135	36.0018	25.5414
	1000	40.4117	39.2344	38.9879	39.1335	33.9943	27.6606	28.8857	28.1293	26.5637	22.0723
	2000	30.5884	29.5851	29.0035	28.2934	27.4452	25.6751	24.7875	24.1656	22.3214	18.1861
Plate 2
Average		NU7441
		0	50	100	250	500	1000	2000	2500	5000	10000
AZD 1775	0	74.8157	71.7698	71.6395	71.7584	71.1099	68.7884	60.2284	59.1538	53.5134	40.5431
	50	67.4784	67.0619	60.3572	70.004	66.1842	69.1927	60.6237	57.8419	54.2924	41.9849
	250	70.9497	65.3903	60.5965	48.327	48.601	38.9346	38.2836	39.5689	38.1689	29.1235
	500	64.4468	61.414	61.3349	54.495	41.7369	37.0494	36.2184	34.8927	35.6189	25.7948
	1000	40.7735	38.0539	38.4637	36.5907	33.1539	27.2543	28.9079	27.1854	27.4755	21.9814
	2000	28.9276	28.509	27.6947	27.9346	26.7063	25.2087	24.4948	24.0682	22.8975	18.3086

## Sheet: H
pT2609-DNA-PK positive cells
Replicates	DMSO	AZD1775	AZD1775-6738	AZD1775	AZD1775-6738
1	0.000929	0.058763	0.222676	0.043094	0.09568
2	0.004655	0.04188	0.160342	0.055715	0.141966
3	0	0.082586	0.209909	0.010417	0.088084
