# Supplementary material for: PTEN and DNA-PK determine sensitivity and recovery in response to WEE1 inhibition in human breast cancer
Source: eLife. 2020 Jul 6;9:e57894. doi: 10.7554/eLife.57894 (PMC7338058; doi:10.7554/eLife.57894)
Supplement: Figure 5—source data 1. — (C) Imaging-based quantification of pS345-CHK1-positive cells in DNA-PK-deficient (clone #2) and DNA-PK-proficient (control) MDA-MB-231 cells treated as indicated, as well as quantification of pT2609-DNA-PK and pS2056-DNA-PK in control cells. (E) Imaging-based quantification of γH2AX-positive cells in the replicating (EdU+) fraction. MDA-MB-231 cells were treated with the indicated inhibitors for 24 hr and proportions of EdU/γH2AX double-positive cells measured. (Supplement 2B) Quantification of HCI-based analysis of CHK1 and DNA-PK in DNA-PK-deficient (clone #2) and DNA-PK-proficient (control) MDA-MB-231 cells treated with 500 nM AZD1775 or the AZD1775 (500 nM)-AZD6738 (1 μM) combination for 24 hr. (Supplement 2C) Cell viability assessment by crystal violet staining assay in response to 72 hr treatment with increasing concentrations of etoposide comparing MDA-MB-231 parental and DNA-PK-deficient cells (clone #2). [file elife-57894-fig5-data1.xlsx]

## Sheet: C
AZD1775
	gScrambled			DNA-PK-KO #2.7
	Mean	SD	replicates	Mean	SD	replicates
pS345-CHK1	1	0.062811	3	0.641171	0.124997	3
AZD1775-6738
	gScrambled			DNA-PK-KO #2.7
	Mean	SD	replicates	Mean	SD	replicates
pS345-CHK1	1	0.048073	3	0.33692	0.174392	3
	AZD1775			AZD1775-AZD6738
	Mean	SD	replicates	Mean	SD	replicates
pS2056-DNA-PK	1	0.088522	3	1.99019	0	3
pT2609-DNA-PK	1	0.136268	3	4.45906	0.470447	3

## Sheet: E
γH2AX-EdU-double-positive cells
DMSO			AZD1775			NU7441			AZD1775-NU7441
Mean	SD	replicates	Mean	SD	replicates	Mean	SD	replicates	Mean	SD	replicates
0.03	0.005592	3	0.07	0.013853	3	0.04	0.003032	3	0.14	0.005531	3

## Sheet: S2B
	gScrambled			DNA-PK-KO #2			gScrambled			DNA-PK-KO #2
	Mean	SD	replicates	Mean	SD	replicates	Mean	SD	replicates	Mean	SD	replicates
total CHK1	1	0.057184	3	0.907673	0.159865	3	0.85731	0.11694	3	0.767661	0.106432	3
total DNA-PK	1	0.125814	3	0.002341	0	3	1.0088	0.05404	3	0	0	3

## Sheet: S2C
Cell survival [%] relative to DMSO
Etoposide [μM]	SCRAMBLED			DNA-PK-KO (#2)
	Mean	SD	replicates	Mean	SD	replicates
1	41.4581	1.08114	5	38	2.28254	5
2	34.8362	1.42481	5	17	1.40358	5
5	21.4164	0.778698	5	11	0.828523	5
10	14.028	0.506592	5	10	0.675341	5
20	12.5393	0.94503	5	10	0.992339	5
