# Supplementary material for: PTEN and DNA-PK determine sensitivity and recovery in response to WEE1 inhibition in human breast cancer
Source: eLife. 2020 Jul 6;9:e57894. doi: 10.7554/eLife.57894 (PMC7338058; doi:10.7554/eLife.57894)
Supplement: Figure 6—source data 1. — (A) Quantification of the proportion of pT2609-DNA-PK-positive HCC38 cells after 24 or 48 hr treatment with the indicated drugs. (Supplement 1G) HCI cell-cycle analysis of BC cell lines based on integrated nuclear DAPI intensity (nuclear area/DAPI mean intensity). [file elife-57894-fig6-data1.xlsx]

## Sheet: A
HCC38
				24h treatment						48h treatment
	DMSO			AZD1775			AZD1775-6738			AZD1775			AZD1775-6738
Replicates	1	2	3	1	2	3	1	2	3	1	2	3	1	2	3
pT2609-DNA-PK-positive	0.016667	0.01087	0.135714	0.562533	0.17402	0.32619	0.363636	0.114286	0.132206	0.125	0.32619	0.158333	0.142857	0.5	0.3625

## Sheet: S1G
Cell line	Subtype (Neve 2006 Cancer cell)	G1-S %	G2 %	M %	Polyploid %
SUM149PT	BaB	72.1	23.4	1.2	3.1
JIMT1		66.875	23.65	2.415	4.465
HCC70	BaA	71.2	25.4	1.7	2.1
HCC1569	BaA	86.6538	5.58462	12.9846	1.06154
HCC38	BaB	63.765	25.41	5.13	2.555
BT549	BaB	57.79	27.995	4.195	5.93
CAL51	BaB	62.625	25.785	5.24	3.325
HCC1937	BaA	71.15	18.8667	4	5.06667
HCC1187	BaA	47.66	28.45	7.99	14.125
MDAMB157	BaB	71.2	18.4	7.8	3.225
SKBR3	Lu	78.16	15.92	0.535	1.63
HS578T	BaB	62.525	25.125	3.2	9.6
MCF7	Lu	65.325	16.13	14.535	3.755
BT20	BaA	48.2	40.425	2.565	5.965
HCC1954	BaA	53.145	37.005	1.665	6.965
HCC1143	BaA	54.24	39.915	2.23	2.54
T47D	Lu	78.5632	18.3158	2.9	0.289474
HCC1419	Lu
HCC1428	Lu	73.25	18.02	2.9	3.68
