# Supplementary material for: PTEN and DNA-PK determine sensitivity and recovery in response to WEE1 inhibition in human breast cancer
Source: eLife. 2020 Jul 6;9:e57894. doi: 10.7554/eLife.57894 (PMC7338058; doi:10.7554/eLife.57894)
Supplement: Supplementary file 1. [file elife-57894-supp1.xlsx]

## Sheet: Sheet1
Cell line	Subtype (Neve 2006 Cancer cell)	Activity area	EC50 (nM)	IC50 (nM)	Clonogenic assay
BT20	BaA	1.93	832	854.53	AZD1775-recurrent
BT549	BaB	2.40	330	329.13	AZD1775-sensitive
CAL51	BaB	2.44	346	348.09	AZD1775-recurrent
HCC1143	BaA	1.83	932	966.64	AZD1775-recurrent
HCC1187	BaA	1.86	502	467.63
HCC1419	Lu	1.18	1084	1374.61	AZD1775-recurrent
HCC1428	Lu	0.86	19771	4821.00
HCC1569	BaA	2.03	97	154.15	AZD1775-sensitive
HCC1937	BaA	1.98	341	384.86	AZD1775-sensitive
HCC1954	BaA	1.79	878	895.54	AZD1775-recurrent
HCC38	BaB	2.52	203	226.96	AZD1775-sensitive
HCC70	BaA	2.61	124	148.4	AZD1775-sensitive
HS578T	BaB	1.64	462	549.7
JIMT1		2.04	103	131.74
MCF7	Lu	1.84	511	566.92	AZD1775-recurrent
MDAMB157	BaB	1.74	363	477.28	AZD1775-sensitive
SKBR3	Lu	1.92	506	516.23	AZD1775-recurrent
SUM149PT	BaB	2.87	65	85.73	AZD1775-sensitive
T47D	Lu	1.42	838	979.72	AZD1775-recurrent
