# Supplementary material for: PTEN and DNA-PK determine sensitivity and recovery in response to WEE1 inhibition in human breast cancer
Source: eLife. 2020 Jul 6;9:e57894. doi: 10.7554/eLife.57894 (PMC7338058; doi:10.7554/eLife.57894)
Supplement: Supplementary file 2. [file elife-57894-supp2.xlsx]

## Sheet: Proteome Data-ratio quant only
Analysis name	Nr of samples with quant ratio	129C_S4_BT20_R1	129C_S5_BT20_R2	129C_S6_BT20_R3	130C_S1_BT549_R1	130C_S2_BT549_R2	130C_S3_BT549_R3	128N_S4_CAL51_R1	128N_S5_CAL51_R2	128N_S6_CAL51_R3	129N_S4_HCC1143_R1	129N_S5_HCC1143_R2	129N_S6_HCC1143_R3	130N_S1_HCC1187_R1	129C_S2_HCC1187_R2	130N_S3_HCC1187_R3	130C_S4_HCC1419_R1	130C_S5_HCC1419_R2	130C_S6_HCC1419_R3	129C_S1_HCC1569_R1	130N_S2_HCC1569_R2	129C_S3_HCC1569_R3	129N_S1_HCC1937_R1	129N_S2_HCC1937_R2	129N_S3_HCC1937_R3	128C_S1_HCC1954_R1	128C_S2_HCC1954_R2	128C_S3_HCC1954_R3	130N_S4_HCC38_R1	130N_S5_HCC38_R2	130N_S6_HCC38_R3	128N_S1_HCC70_R1	128N_S2_HCC70_R2	128N_S3_HCC70_R3	127C_S1_LCC2_R1	127C_S2_LCC2_R2	127C_S3_LCC2_R3	127N_S1_MCF7_HJ_R1	127N_S2_MCF7_HJ_R2	127N_S3_MCF7_HJ_R3	127N_S4_MCF7_R1	127N_S5_MCF7_R2	127N_S6_MCF7_R3	127C_S4_MDAMB157_R1	127C_S5_MDAMB157_R2	127C_S6_MDAMB157_R3	126_S1_SKBR3_R1	126_S2_SKBR3_R2	126_S3_SKBR3_R3
Cell line		BT20	BT20	BT20	BT549	BT549	BT549	CAL51	CAL51	CAL51	HCC1143	HCC1143	HCC1143	HCC1187	HCC1187	HCC1187	HCC1419	HCC1419	HCC1419	HCC1569	HCC1569	HCC1569	HCC1937	HCC1937	HCC1937	HCC1954	HCC1954	HCC1954	HCC38	HCC38	HCC38	HCC70	HCC70	HCC70	LCC2	LCC2	LCC2	MCF7_HJ	MCF7_HJ	MCF7_HJ	MCF7	MCF7	MCF7	MDAMB157	MDAMB157	MDAMB157	SKBR3	SKBR3	SKBR3
Replicate		R1	R2	R3	R1	R2	R3	R1	R2	R3	R1	R2	R3	R1	R2	R3	R1	R2	R3	R1	R2	R3	R1	R2	R3	R1	R2	R3	R1	R2	R3	R1	R2	R3	R1	R2	R3	R1	R2	R3	R1	R2	R3	R1	R2	R3	R1	R2	R3
Subtype (Neve 2006 Cancer cell)		BaA	BaA	BaA	BaB	BaB	BaB	BaB	BaB	BaB	BaA	BaA	BaA	BaA	BaA	BaA	Lu	Lu	Lu	BaA	BaA	BaA	BaA	BaA	BaA	BaA	BaA	BaA	BaB	BaB	BaB	BaA	BaA	BaA	Lu	Lu	Lu	Lu	Lu	Lu	Lu	Lu	Lu	BaB	BaB	BaB	Lu	Lu	Lu
TMT tag		129C	129C	129C	130C	130C	130C	128N	128N	128N	129N	129N	129N	130N	129C	130N	130C	130C	130C	129C	130N	129C	129N	129N	129N	128C	128C	128C	130N	130N	130N	128N	128N	128N	127C	127C	127C	127N	127N	127N	127N	127N	127N	127C	127C	127C	126	126	126
TMT set		S4	S5	S6	S1	S2	S3	S4	S5	S6	S4	S5	S6	S1	S2	S3	S4	S5	S6	S1	S2	S3	S1	S2	S3	S1	S2	S3	S4	S5	S6	S1	S2	S3	S1	S2	S3	S1	S2	S3	S4	S5	S6	S4	S5	S6	S1	S2	S3
A2M	54	0.996279	0.763892	0.787172	1.03291	0.691874	0.911527	0.552035	0.362175	0.584997	0.428909	0.315189	0.402904	0.599725	0.514913	0.615222	0.685425	0.519153	0.605736	7.39551	5.46941	7.87334	0.711584	0.575204	0.614234	0.656955	0.510947	0.652119	0.683359	0.448792	0.616828	0.508389	0.458343	0.541319	0.578338	0.50806	0.575368	0.563556	0.492818	0.541941	0.451877	0.376415	0.475118	0.706506	0.416834	0.559311	0.472879	0.532902	0.485595
A2ML1	54	0.810453	0.94817	0.913976	0.640158	0.536698	0.492937	0.515952	0.56491	0.48297	1.3845	1.33088	1.27664	0.573018	0.521859	0.574086	0.501133	0.600116	0.570029	0.535962	0.540809	0.57557	0.941279	0.812425	0.819493	0.575112	0.493755	0.572557	0.520227	0.585249	0.528267	3.81411	4.55854	4.09024	0.570239	0.441204	0.513687	0.575589	0.471944	0.544781	0.384916	0.390534	0.441947	0.42677	0.426625	0.470015	1.11118	1.16329	1.14648
A4GALT	18	0.730571		0.680942				0.772319		0.858114	1.78198		1.86577				0.95344		1.12499										0.799195		0.830239										1.061		1.2332	0.822236		0.915278
AAAS	54	0.892663	0.948267	0.968398	1.10643	1.04044	1.08959	1.27762	1.26044	1.23503	0.830412	0.873093	0.815935	1.13491	1.22096	1.08276	0.788515	0.808	0.831895	0.978512	0.957901	0.996527	0.966458	0.917929	0.962627	1.07231	1.17883	1.16091	0.877715	0.887475	0.891378	0.996145	0.999007	1.02564	0.883874	0.908208	0.865585	0.840489	0.798961	0.801283	0.895155	0.801235	0.763853	0.74713	0.893217	0.797676	1.10451	1.18514	1.08876
AACS	54	1.28814	1.30329	1.27054	0.596206	0.557531	0.484157	0.648359	0.609243	0.599481	1.09452	1.1394	1.12642	0.870267	0.892365	0.872992	1.35715	1.38946	1.39504	0.811142	0.805722	0.763965	0.944586	0.925132	0.930478	0.831105	0.850845	0.812395	1.35099	1.39159	1.41787	1.39951	1.45535	1.51516	0.936923	0.920984	0.946791	1.02076	1.005	1.08529	1.07573	1.14753	1.09678	0.858497	0.783393	0.843173	1.19305	1.26913	1.25734
AADAT	18			0.390376		0.595138				1.31854			1.00697		2.13081				1.17899		1.32453			1.05119			0.60149				0.970713		0.46088			1.36189			0.615374				0.717812			0.689356		0.507539
AAED1	54	1.23501	0.98684	1.17597	2.74575	1.75758	2.1762	0.966644	0.952713	1.05083	1.18192	1.66511	1.57601	0.681575	0.822132	0.751811	0.731729	0.65603	0.72077	0.827447	0.991151	1.15911	1.37828	1.33328	1.38276	1.22801	1.05059	1.28917	0.995197	1.19018	1.26806	0.771914	0.904355	0.931662	0.672837	0.748648	0.951036	0.734505	0.776373	0.778173	0.704131	0.589825	0.747914	1.16592	1.31427	1.30278	0.774822	0.830179	0.90702
AAGAB	54	1.45253	1.27628	1.85538	0.816672	0.824529	0.429209	0.937536	1.05526	1.09101	0.884081	0.757314	0.82164	0.617429	0.707136	0.74569	1.00817	0.975505	0.933766	0.758922	0.707531	0.81045	0.95269	0.877851	1.15791	0.959578	0.888055	1.22394	0.966723	1.04801	1.00021	0.780911	0.846403	0.889843	1.28197	1.28417	0.456594	1.11054	1.06829	0.875454	1.25346	1.09985	1.29212	0.900035	0.807717	0.920627	0.692256	0.796242	0.712645
AAK1	54	2.49316	2.41475	2.16892	0.993559	0.970053	1.0591	0.684962	0.637515	0.710183	0.989182	0.918459	0.977035	0.740727	0.716619	0.707511	1.13997	1.16237	1.13444	0.973963	0.921556	0.942491	1.27539	1.27308	1.31102	1.3987	1.38595	1.46067	1.09187	1.03911	1.05208	1.1703	1.18408	1.18519	0.744796	0.632729	0.696041	0.857041	0.837169	0.788441	0.788449	0.80607	0.818485	1.71334	1.77862	1.5935	1.01719	0.930579	0.950371
AAMDC	54	0.816349	0.890355	0.768432	0.895397	0.929957	0.994986	0.776751	0.848188	0.773501	1.02601	1.11929	1.09141	1.15162	1.20282	1.24393	1.57371	1.37387	1.26132	1.32489	1.42187	1.53173	0.842999	0.806965	0.841129	0.885035	0.777033	0.796165	0.912957	0.948179	0.894111	1.02382	0.960537	0.998906	1.04604	0.961595	1.03727	1.34294	1.25664	1.22143	1.05977	1.11672	1.12352	1.11127	1.24397	1.23718	0.863559	0.920193	0.936624
AAMP	54	1.0076	1.01003	0.973225	0.746053	0.655511	0.689652	1.34245	1.40132	1.44327	0.896655	0.910654	0.95601	0.797893	0.710701	0.78542	0.935188	0.857481	0.924229	0.843127	0.841859	0.734969	0.825366	0.814728	0.783728	0.812166	0.775373	0.731759	1.60792	1.56498	1.53398	0.766429	0.626535	0.627763	1.44825	1.60144	1.62607	0.950894	0.968839	1.0115	1.05198	1.07361	1.03216	1.24143	1.22067	1.24914	0.897327	0.800905	0.82881
AAR2	54	1.14259	1.16262	1.16313	1.08274	1.12668	1.13933	0.955393	0.893539	1.05483	0.913536	0.870058	0.890622	0.868292	0.884322	0.864577	1.17768	1.13911	1.22663	0.958484	1.0237	1.03637	0.878021	0.893713	0.947542	0.824681	0.853396	0.82034	1.07339	1.08633	1.09414	0.699962	0.672667	0.617683	1.098	1.08073	1.02668	0.898961	0.987404	0.888276	0.874034	0.822382	0.884968	1.10032	1.13548	1.17884	1.37658	1.34514	1.25886
AARD	27		0.77497	0.673216		0.708211			0.723309	0.610954		1.44786	2.74184		1.0063			0.443731	0.485809		2.10056			0.827536			0.630518			1.13398	1.74368		0.646802			0.595562			0.639351			0.654297	0.425093		0.976503	0.829233		0.77791
AARS	54	1.33105	1.3677	1.31712	0.844184	0.883509	0.876688	0.794488	0.805331	0.779444	0.907034	0.913731	0.91388	0.92952	0.943828	0.946988	1.12508	1.14571	1.13038	0.763889	0.78372	0.771729	1.02864	1.00012	1.03584	0.909532	0.917775	0.896159	1.10243	1.10604	1.10279	1.4003	1.38981	1.42633	1.10965	1.11713	1.11402	1.23591	1.26815	1.28696	1.37375	1.41226	1.40098	0.80753	0.798493	0.800954	0.615771	0.63176	0.608947
AARS2	54	1.07951	1.09475	1.12339	1.02731	0.846915	0.873347	1.10901	1.15783	1.16464	1.08344	1.19038	1.19862	1.06468	1.10873	1.04582	1.1476	1.14638	1.22968	1.59158	1.67559	1.5647	1.03096	1.01758	1.11098	0.977178	0.92182	0.990843	0.787151	0.778184	0.781959	0.950287	0.899351	0.941854	1.0549	1.08873	1.03534	0.849983	0.887226	0.842151	0.899457	0.852521	0.88564	0.863635	0.859	0.865221	0.880552	0.84119	0.82808
AARSD1	54	0.747727	0.737549	0.872915	0.517129	0.563662	0.583151	1.30237	1.21159	1.21209	0.698573	0.620217	0.717376	0.781219	0.842914	0.908804	0.912408	0.852304	0.775509	0.862074	0.986589	0.783445	1.14011	1.58798	1.0454	1.34442	1.24379	1.24766	1.27938	1.15625	1.58687	0.966893	1.14494	0.91068	0.87515	0.807886	0.725539	0.721097	0.908304	0.780527	0.803446	0.743219	0.831708	1.07697	1.15343	1.45112	1.06273	1.16222	1.01264
AASDH	54	1.05014	0.932443	1.1699	1.06197	0.96723	1.05162	1.03654	1.22883	1.05104	1.38681	1.17522	1.19844	0.798407	0.77216	0.936716	1.5376	1.54333	1.5042	1.00376	0.977971	1.08257	1.18046	1.11235	1.01846	1.12233	1.11576	1.08834	1.02451	0.929157	0.924637	0.760273	0.641189	0.681881	1.27053	1.40133	1.35443	0.857656	0.996111	0.922838	0.79497	0.754438	0.775164	0.778889	0.621706	0.673409	1.3491	1.54408	1.33655
AASDHPPT	54	1.27831	1.4528	1.34281	1.06755	1.22422	1.0671	1.67864	1.71638	1.84198	0.879565	0.917865	0.938401	1.29677	1.43254	1.29059	0.692152	0.664288	0.691875	1.219	1.28605	1.10645	0.898858	1.01245	0.846174	0.838198	0.919567	0.792085	1.18555	1.28717	1.30263	0.686125	0.63836	0.657989	0.753479	0.781334	0.776282	0.649443	0.594413	0.640737	0.6707	0.571956	0.696602	1.06664	1.0311	1.09453	1.00226	1.03783	0.983622
AASS	54	0.735854	0.787274	0.890293	0.726419	0.876681	0.690412	3.38775	3.30967	3.11397	0.70551	0.663298	0.849569	3.43889	3.92519	3.51124	0.488254	0.437544	0.613783	0.763643	0.825945	0.792451	0.586772	0.565938	0.55499	0.434527	0.68208	0.505954	0.458999	0.511402	0.592396	0.444335	0.493812	0.460882	0.522858	0.561362	0.556576	0.378319	0.480165	0.399662	0.529258	0.53568	0.55953	1.51576	1.55875	1.44604	0.397381	0.472939	0.428011
AATF	54	1.07316	1.18246	1.12709	0.991224	0.938583	0.999585	1.06833	1.12919	1.20872	0.899182	0.94003	0.894689	0.977976	0.91518	0.99949	0.829782	0.862967	0.880423	0.979083	0.983349	0.964797	1.05941	1.17114	1.13465	1.18416	1.16921	1.20622	0.903311	0.899766	0.905147	0.875273	0.860263	0.869439	1.05616	1.09195	1.06767	0.982404	0.963522	0.956283	1.00072	1.02104	0.946572	1.01802	1.04523	1.07022	1.27142	1.18095	1.2449
ABAT	54	1.09382	1.04221	1.15729	0.458533	0.510536	0.510073	0.799113	0.830911	0.735632	0.67928	0.653391	0.668841	0.499625	0.520322	0.565641	1.07508	1.04997	1.11279	0.666134	0.875715	0.699639	0.996807	1.02224	0.984586	0.6451	0.677811	0.625542	0.579815	0.550312	0.554805	0.755718	0.754462	0.640975	1.83801	1.70779	1.78413	2.48697	2.30998	2.2434	3.32483	3.24893	3.75424	0.683684	0.627922	0.72405	0.535088	0.471762	0.485287
ABCA12	54	0.8738	0.93284	1.38024	0.951935	0.584391	0.898367	0.711927	0.748395	0.695265	0.750406	0.83572	0.863433	0.917283	0.664453	0.881939	1.53361	1.51233	0.963321	1.024	0.788402	0.909889	1.13981	0.818275	0.65502	1.05873	1.20981	1.23161	0.733977	0.601625	1.12672	1.141	1.44482	0.989369	1.15598	1.64078	1.37847	1.04079	1.13815	1.10407	1.6754	0.883661	1.2497	0.768512	0.898508	0.768497	1.21884	1.39474	1.12579
ABCA13	9		0.877687						0.794022			0.863173						0.891868												1.09397												0.874232			1.02368
ABCA2	54	0.910352	0.815359	0.875041	0.641551	0.811767	0.610774	0.7676	0.721911	0.765697	0.762642	0.723301	0.753883	0.980436	0.973298	1.03731	0.927574	0.848905	0.924042	0.842492	0.885786	0.815419	0.805777	0.809189	0.775743	0.700589	0.773976	0.737293	0.654721	0.505838	0.612524	0.809761	0.907522	0.878374	1.12038	1.15537	1.15822	1.68086	1.75037	2.12269	1.51114	1.59533	1.45669	0.817291	0.810494	0.84142	0.997882	1.08691	0.988751
ABCA3	54	0.547331	0.468652	0.66133	1.92387	2.24011	2.06924	0.561567	0.562903	0.648314	0.883302	0.830728	0.856679	0.755502	0.633326	0.642399	1.61049	1.65899	1.42046	0.619968	0.564609	0.569275	0.658212	0.649011	0.544415	0.637721	0.741961	0.58808	0.606756	0.541621	0.670215	0.55489	0.6475	0.503649	1.78271	1.84021	1.9956	1.12441	0.993597	1.0063	1.19057	1.1843	1.13619	0.839488	0.790473	0.811286	0.715419	0.791691	0.741145
ABCA5	54	0.54667	0.844748	0.683173	1.43791	2.20929	2.01965	0.348814	0.293286	0.589914	0.572157	0.621465	0.696713	0.853863	0.990854	0.779122	0.992738	1.11061	0.988634	0.733179	0.771528	0.71727	0.708776	0.979772	0.883456	0.72166	0.627292	0.578839	1.05842	1.34451	1.20025	0.631161	0.53187	0.413266	0.578011	0.613879	0.52657	1.00418	1.22736	1.12176	1.12267	1.0706	1.15894	2.05133	2.22697	2.36816	0.992406	1.18223	1.1803
ABCA7	18				0.806908	1.22803								0.868096	1.16271					0.81967	0.911481		1.15799	0.97724		1.1134	0.957548					1.24509	1.07971		0.787293	0.897875		0.975482	0.927665								1.10054	0.943765
ABCB1	27	0.69878	0.537413	0.638859				5.31041	7.07715	6.6668	1.05709	1.01393	1.67685				0.882268	0.647685	1.09404										0.889673	0.718554	0.706031										0.685877	0.623575	0.783227	0.746233	0.629936	0.827771
ABCB10	54	0.852266	0.853445	0.881553	1.1232	0.939737	1.02387	1.18223	1.23444	1.31333	0.761431	0.696078	0.743444	1.08001	1.03174	1.03535	0.899403	0.997544	0.943821	1.84021	1.6444	1.66641	0.87011	0.827879	0.887469	1.13568	1.0958	1.11499	0.727577	0.791638	0.739017	0.876529	0.792931	0.875166	0.799091	0.803006	0.757631	0.76367	0.710566	0.733477	0.78102	0.674188	0.742608	1.03808	1.09373	1.09235	1.26502	1.21487	1.09795
ABCB11	9					0.598504									0.474177						1.51161			2.30138			2.24574						2.45702			0.626795			0.678739									0.853124
ABCB6	54	1.2186	1.25764	1.12029	0.836124	0.724687	0.785465	1.30238	1.39346	1.38276	0.750814	0.735471	0.781496	0.772757	0.761028	0.753056	1.356	1.40635	1.42835	0.868686	0.900778	0.845403	0.617877	0.581387	0.615274	0.617735	0.67568	0.554623	0.788469	0.678363	0.742353	0.80418	0.784606	0.806803	1.16649	1.20727	1.12931	0.90378	0.91428	0.859677	1.14259	1.06335	1.07492	1.616	1.92662	1.60662	0.898001	0.915721	0.860129
ABCB7	54	0.754986	0.73647	0.764778	1.03197	0.963852	0.93164	0.839548	0.821027	0.808932	1.17861	1.26679	1.17869	1.4876	1.53117	1.48227	0.906469	0.879448	0.906639	1.16395	1.04868	1.13494	0.899364	0.84963	0.802836	0.951073	0.942676	0.908958	1.27876	1.28242	1.27426	1.06257	1.07665	1.10311	0.835397	0.860348	0.82572	0.806351	0.794018	0.800172	0.772817	0.729831	0.764824	0.735062	0.715086	0.790088	1.38803	1.43256	1.46673
ABCB8	54	1.12573	1.13464	1.25199	1.00768	0.940853	0.903215	0.833767	0.963546	0.966109	0.963476	0.955403	1.02343	0.752611	0.738426	0.74379	1.11736	1.28817	1.41801	1.57856	1.51395	1.56258	0.716105	0.761499	0.741551	1.00363	0.927238	0.95898	0.69555	0.850673	0.56631	0.915152	0.881874	0.843518	0.935343	0.821728	0.795973	1.03075	0.982469	0.978622	0.949996	0.972687	1.00243	0.717082	0.723075	0.731565	1.93114	1.80656	2.14522
ABCB9	54	1.00056	0.962816	0.909628	0.971165	1.07118	0.856308	0.78502	0.739989	0.571592	1.00309	1.07439	0.886487	0.831597	1.16253	0.721644	2.69831	3.8656	4.34799	0.800837	1.34233	1.25201	0.692541	0.974462	0.74711	0.708511	0.71083	0.786061	0.815919	0.840489	0.686301	0.943412	1.02597	0.896922	1.21589	0.894368	0.883355	1.2078	0.886583	0.865351	1.20379	1.32757	1.28964	1.01801	1.28132	1.07523	1.11264	1.01211	0.852494
ABCC1	54	0.712555	0.736188	0.739745	1.18974	1.17468	1.07303	0.779161	0.841621	0.782152	0.679787	0.700923	0.672435	1.65438	1.71764	1.65196	0.636142	0.67362	0.670573	1.341	1.35037	1.32879	0.928264	1.01118	0.965208	0.799606	0.82205	0.787867	1.29068	1.35039	1.27737	0.776205	0.794283	0.776402	0.746869	0.801334	0.781573	0.751616	0.774079	0.77669	0.809001	0.778381	0.764188	1.16718	1.21576	1.13456	0.892993	0.907867	0.903222
ABCC10	54	1.03933	1.12801	1.20199	0.953731	0.917627	0.885936	1.12169	1.04274	1.03577	0.756404	0.821495	0.835753	0.809617	0.835436	0.87644	1.27203	1.18347	1.30391	0.697145	0.813678	0.738362	1.5975	1.63616	1.29581	1.15164	1.13887	1.10667	0.619637	0.684208	0.672832	1.0358	1.0673	1.06201	1.05481	1.05075	0.955751	0.930429	0.899255	0.953958	1.20324	1.18121	1.22189	1.32733	1.19066	1.20431	0.943445	0.987625	0.981553
ABCC11	27	0.621625	0.543753	0.869528				0.938727	0.633628	0.740346	0.724941	0.541171	0.583646				1.41124	1.63799	1.64799										0.609162	0.516698	0.594457										0.785655	0.598309	0.71783	0.971637	1.19185	0.903714
ABCC2	27	6.75466	7.05985	6.50789				0.566614	0.805313	0.533216	0.774824	0.852025	0.710051				1.09274	1.15094	1.1271										0.5907	0.64604	0.501386										0.77364	0.715664	0.709639	0.774419	0.757847	0.661857
ABCC3	54	0.988724	1.02408	1.02832	0.953039	0.911597	0.957714	0.569067	0.500768	0.573588	0.871984	0.857236	0.883405	0.636036	0.586546	0.653909	0.579688	0.516499	0.604089	0.596353	0.711869	0.613575	2.05446	1.92231	1.95654	0.569754	0.586198	0.653117	2.07433	2.12222	1.99319	1.58495	1.42044	1.45225	0.951002	0.942769	0.91863	0.87634	0.850029	0.856065	0.767104	0.764965	0.82151	0.928728	0.994804	0.930594	0.88836	1.00721	0.941152
ABCC4	54	0.606174	0.632929	0.643767	2.28948	1.78838	2.21729	1.4771	1.62621	1.65338	1.20341	1.30686	1.31653	0.389194	0.450378	0.405457	0.7094	0.54112	0.525441	1.85989	1.54214	1.56668	0.659399	0.605235	0.623699	0.584216	0.586974	0.607468	1.08896	1.11063	1.09026	0.367712	0.44999	0.449344	0.51083	0.529919	0.527539	0.587789	0.65432	0.638841	0.725564	0.592437	0.586929	1.92886	2.17412	2.32651	0.35591	0.39876	0.410515
ABCC5	54	0.99054	0.970668	0.984388	0.825298	0.87042	0.876238	0.685387	0.587721	0.675047	0.79338	0.701853	0.750747	0.601064	0.652305	0.685853	1.97769	1.91613	2.06391	1.03224	1.03211	0.947442	1.24003	1.26451	1.23021	0.97893	0.993678	1.00371	0.874648	0.884843	0.877407	1.06981	1.11103	1.05389	1.44334	1.48536	1.44692	0.827547	0.846326	0.879372	0.918589	0.86565	0.87946	0.759011	0.717236	0.732126	1.5474	1.44446	1.44779
ABCD1	54	1.22662	1.22371	1.19238	0.924864	0.857816	0.832063	0.537775	0.557894	0.532386	0.817843	0.852084	0.809139	0.718565	0.814878	0.681233	0.927728	0.855441	0.904094	1.38519	1.2966	1.33393	0.717346	0.728073	0.622942	0.7912	0.812484	0.730093	0.673646	0.695085	0.694647	1.28887	1.29283	1.17684	0.882326	0.966944	0.909204	0.677645	0.638888	0.616011	0.590181	0.672725	0.64596	1.45305	1.75779	1.53838	2.01145	2.20207	2.41024
ABCD3	54	1.15088	1.16448	1.16549	0.895704	0.799605	0.843002	1.10301	1.10717	1.07121	0.706672	0.683405	0.736603	0.940756	0.933973	0.964848	1.59633	1.62002	1.52042	0.925234	0.93202	0.882684	1.38042	1.38215	1.35348	0.924014	0.969447	0.935636	1.18031	1.17864	1.19099	1.80541	1.80281	1.76859	0.785396	0.808971	0.762148	0.744773	0.774423	0.746889	0.751454	0.770542	0.809231	0.979252	0.986866	0.996027	1.23463	1.25726	1.20182
ABCD4	54	0.718546	0.775991	0.702661	0.962405	0.98879	0.919176	0.871672	0.907596	0.683975	1.05575	1.0816	0.885917	0.9274	0.889997	0.921379	0.981843	1.06664	0.974237	0.657398	0.453882	0.820029	0.847025	0.80409	1.0355	1.0565	0.726476	0.659186	1.10654	1.10041	0.954123	0.803699	0.605359	0.716824	0.790091	0.820363	0.718553	0.840775	0.815687	0.934991	0.972199	0.923451	0.791809	2.62586	2.13258	2.36497	0.986663	0.738625	1.14901
ABCE1	54	0.984102	0.996076	0.96671	0.988985	1.04436	1.02497	1.30215	1.29262	1.26404	0.889312	0.871699	0.867342	1.02793	1.03233	1.03685	0.846276	0.834692	0.849341	0.923162	0.974994	0.90193	1.48523	1.50707	1.54703	0.980752	0.963185	0.946649	1.2052	1.24306	1.21564	0.862096	0.872637	0.865544	1.12505	1.12077	1.10418	0.943992	0.962827	0.949857	0.945624	0.956875	0.922639	0.981718	0.981274	0.955733	1.11409	1.10562	1.10572
ABCF1	54	1.1974	1.23966	1.1891	1.05965	1.16467	1.17228	1.0511	1.08644	1.07961	1.07944	1.08426	1.03322	1.22508	1.28402	1.28644	1.04512	1.05545	1.04932	0.774355	0.740287	0.770328	0.942542	0.927436	0.951958	1.09127	1.13362	1.13922	1.06642	1.06019	1.04145	0.794049	0.79184	0.788815	1.0537	1.10925	1.1222	0.962781	0.97012	1.01539	0.982919	0.945947	0.957667	1.2044	1.22764	1.22813	0.819635	0.866285	0.814991
ABCF2	54	1.42918	1.42242	1.40697	1.20745	1.23344	1.22859	1.20795	1.19303	1.23418	1.06285	1.01355	0.987652	0.943447	0.941922	0.968269	0.757096	0.808906	0.769485	1.52378	1.41135	1.47897	0.910052	0.926378	0.928249	1.24242	1.24248	1.28458	0.978913	0.939526	0.956797	0.872969	0.862148	0.874888	0.995685	0.978302	1.01187	0.887005	0.840508	0.905821	0.95267	0.929669	0.953641	0.952022	0.919789	0.934567	1.06176	1.02664	1.05233
ABCF3	54	0.972631	0.994583	0.938738	0.801949	0.746347	0.740889	0.845485	0.847728	0.830994	0.898919	0.93239	0.902692	0.872088	0.846231	0.877396	1.20535	1.21887	1.19385	0.833626	0.870591	0.827805	1.26981	1.24203	1.29522	1.19521	1.14316	1.20025	0.979619	0.956851	0.970067	1.03392	1.00611	1.05155	1.07748	1.03426	1.01771	0.820134	0.783282	0.799089	0.892886	0.915119	0.861023	0.978641	1.02791	0.991398	1.30614	1.26874	1.29285
ABCG2	54	3.06689	2.8032	2.7691	1.86258	2.21866	1.82543	1.83248	1.63605	1.78778	0.657715	0.681174	0.758674	0.40122	0.502151	0.614489	0.658594	0.8324	0.709902	0.51052	0.536387	0.564997	1.62586	1.84723	1.51342	1.08077	0.967583	0.947188	0.567855	0.505082	0.578184	0.445144	0.542888	0.483158	0.522911	0.427202	0.585717	1.13426	0.981902	0.99193	2.88034	2.89998	2.3925	1.06305	0.96632	1.10189	0.452981	0.447013	0.702647
ABHD10	54	1.28944	1.47623	1.4665	0.986018	0.875946	0.918946	0.936055	0.808013	0.827336	0.95799	0.90226	0.933207	0.733963	0.691508	0.672095	1.54964	1.62708	1.5511	1.56634	1.50453	1.67082	1.20279	1.17051	1.2057	0.880632	0.842588	0.875478	0.825723	0.791649	0.782805	1.30105	1.2906	1.4739	0.947705	0.923406	0.889829	0.8297	0.750495	0.723486	0.824089	0.777552	0.777248	0.873159	0.819337	0.931987	1.05804	1.01863	0.954257
ABHD11	54	0.754186	0.604644	0.627297	0.829249	0.726717	0.742442	0.789492	0.62506	0.713271	0.84955	0.803726	0.782332	0.781709	0.838886	0.739179	0.924232	0.930202	0.91297	1.05674	1.0793	1.06469	0.823617	0.909962	0.884657	1.07273	1.02684	1.09927	0.786405	0.695002	0.693119	1.08596	1.05937	1.03802	1.1924	1.20813	1.26241	1.26248	1.26516	1.27057	1.29237	1.32355	1.20736	0.745007	0.756217	0.74246	1.6465	1.66875	1.59558
ABHD12	54	0.761461	0.597049	0.749261	1.07227	1.01334	1.02352	0.80819	0.900483	0.8981	0.962766	0.988636	0.968722	0.866783	0.735878	0.813984	1.3196	1.15245	1.2637	1.59992	1.6169	1.64371	0.968736	0.913466	0.83795	0.735094	0.652546	0.638817	0.872181	0.867723	0.936183	1.10796	1.03162	1.10767	0.90684	0.895851	0.861916	1.16957	1.16641	1.1589	1.24495	1.18238	1.32495	1.00317	0.901267	0.987409	1.52992	1.51876	1.54246
ABHD13	54	1.09502	1.34569	1.15723	0.995749	0.986506	0.936316	1.03589	1.53717	1.14031	1.38584	1.95802	2.09412	0.879739	1.5101	0.780089	1.04422	0.561728	1.20681	0.784937	0.427376	1.15964	0.747418	1.16874	0.926187	0.767388	0.593958	0.491941	0.908758	0.932705	1.06866	0.654879	0.682942	0.909925	0.972061	0.846568	0.820378	0.619773	0.910233	0.564675	0.928687	0.90347	0.960368	1.35832	1.61609	1.22398	0.887958	1.01781	0.557537
ABHD14A	26	0.995835	NA	1.301				1.1134	0.511507	1.60805	1.34693	0.238239	1.11505				1.04747	0.598498	1.19294										1.14461	1.04924	1.72104										1.34861	0.395364	1.04911	0.880671	0.470509	1.28671
ABHD14B	54	0.673289	0.603435	0.731246	0.594836	0.689106	0.686806	0.60885	0.552422	0.668639	0.878326	0.853951	0.928633	0.607345	0.602047	0.641659	1.56661	1.63774	1.60526	0.632877	0.717379	0.719014	1.05945	1.03511	1.18976	0.79537	0.839642	0.80423	0.827774	0.751181	0.833769	0.98751	0.878627	0.931502	0.889243	0.937005	0.86917	0.772682	0.756053	0.760451	0.68237	0.64476	0.728384	1.12791	1.06953	1.17502	1.78293	1.55135	1.57439
ABHD15	36		0.784674	0.791901	0.933645		0.998921		1.19837	1.52285		0.755876	0.94189	0.900612		0.721875		0.519021	0.890835	1.0347		0.904821	0.98603		1.16396	0.664393		0.87348		1.04438	1.03375	0.648677		0.837512	1.13809		0.849042	1.5735		2.08381		2.08474	2.34073		0.896348	0.625295	0.765717		0.554586
ABHD16A	54	0.876184	0.857126	0.868676	1.06242	0.99258	1.11884	0.837246	0.83876	0.857089	0.855776	0.825938	0.88528	1.43143	1.37844	1.45488	1.08739	1.02225	0.994473	0.869327	0.930494	0.905168	0.963759	0.903256	0.994167	0.943886	0.905079	0.983858	1.15578	1.03722	1.0478	0.950428	1.00493	0.974249	0.903501	0.821045	0.897402	1.06911	1.09211	1.00094	1.07374	1.10666	1.09159	1.23293	1.13397	1.0946	0.793347	0.796763	0.825909
ABHD17A	54	0.999734	0.634435	1.31017	1.26388	1.12218	1.08097	0.888724	0.635157	1.11293	1.32442	1.0445	1.37626	1.05369	0.960864	1.24007	1.41675	1.1502	1.01467	0.83504	1.05685	0.640122	0.879395	1.33579	0.838783	0.759762	0.929254	0.934366	0.738963	0.934793	1.02454	0.860417	1.02612	0.870733	1.09773	1.11855	0.968524	0.774005	0.925648	0.802514	0.900286	0.719301	0.883923	1.11187	0.626101	0.866984	0.835637	1.10703	0.715698
ABHD17B	54	1.01728	0.96462	1.02357	1.68922	1.63312	1.77448	1.10054	1.10806	1.08866	0.873742	0.859326	0.657676	0.999947	0.987955	1.13545	1.11193	1.3838	1.18887	0.838985	0.844074	1.04074	0.807383	0.918224	1.04456	0.899171	0.915396	0.934235	0.878777	0.761239	0.764107	0.712567	0.829897	0.855342	0.779508	0.724798	0.836625	0.750028	0.873839	0.770676	0.914574	0.799789	0.893168	0.955704	0.809325	0.915349	0.817905	0.940873	0.959738
ABHD17C	54	0.915506	0.728464	0.769165	0.864188	0.774216	0.708961	0.755148	0.777046	0.95457	1.14033	0.689742	1.03338	0.880541	0.791877	0.76907	1.12069	1.21405	1.09685	0.838119	0.705944	0.772743	0.884144	0.874938	0.899443	1.14541	0.904622	1.26034	0.76032	0.918169	0.834409	0.847288	0.827847	1.12573	1.62262	1.5289	2.07085	0.974134	1.03657	1.20113	1.24352	2.04669	1.6348	0.950966	0.564503	0.874304	1.15736	1.06739	1.1328
ABHD2	45	1.41342	1.41545	1.74078		1.03414	0.919952	1.1891	0.967174	1.09354	0.938403	0.696471	0.665908		0.894491	0.847801	1.20389	1.1154	1.51319		0.97243	0.876435		0.884737	1.09457		0.725781	0.874037	1.25409	1.23759	1.89664		0.74785	0.812544		0.916724	0.868947		1.57877	1.389	1.78956	1.70523	2.19156	0.959535	1.06785	1.03406		1.07021	0.845732
ABHD3	54	0.70071	0.81036	0.776283	0.747374	0.782251	0.906168	0.776554	0.841666	0.900582	0.994864	0.942652	0.874026	0.975384	0.941982	1.16133	1.2096	1.53885	1.59069	0.877254	0.874166	1.01963	1.04851	1.16152	0.999925	1.29347	1.21425	1.48797	0.860818	0.747864	0.799243	1.33122	1.18348	1.49179	0.669113	0.811133	0.58152	0.600762	0.785561	0.574505	0.794884	0.752986	0.840083	1.23845	1.03861	1.11928	1.39238	1.29484	1.4251
ABHD4	54	1.1989	1.74475	1.20782	1.13323	0.628423	0.65772	1.33021	1.05422	1.00177	0.914711	0.770123	0.78764	0.866887	1.23575	1.21444	1.40166	2.3528	1.38995	0.997462	0.841911	1.02846	0.687093	0.936789	0.926496	1.04534	1.35726	1.68603	0.915612	0.562055	0.941365	1.16151	1.09488	0.923965	1.1882	1.08194	1.13162	0.897184	1.11789	1.10167	1.04591	0.740271	1.20312	1.0223	0.731476	0.965192	1.43122	1.54747	2.08667
ABHD5	54	1.13866	1.15332	1.01078	0.84559	0.911824	0.974747	1.00947	1.1722	1.01713	0.462153	0.673039	0.535576	1.50222	1.44235	1.33899	1.68771	1.65406	1.41572	1.02093	1.10448	0.960162	0.930369	0.946749	0.829603	1.06074	1.15114	1.05689	0.804166	0.880326	0.786145	0.713588	0.834027	0.699986	1.04494	0.988564	0.938879	0.807409	0.917849	0.827803	1.23502	1.11547	1.13504	0.823267	0.953748	0.972506	0.84772	0.859913	0.949509
ABHD6	54	0.947076	0.976116	1.07801	1.36405	1.39991	1.39213	0.857427	0.893462	0.93027	1.0246	1.13383	1.14688	0.955462	1.01384	1.07745	1.23966	1.5751	1.31789	1.01605	0.90282	0.92213	1.23701	1.46993	1.28165	1.0118	1.09548	1.1818	0.84328	0.879763	0.889888	1.07311	1.1118	1.23543	0.731174	0.778155	0.771226	0.673786	0.795405	0.833238	0.584586	0.681554	0.613711	1.11227	1.10275	1.01977	0.942996	0.984004	1.02293
ABHD8	18			1.60236	1.68127					1.07856			0.994637	0.910275					1.26544	0.464726			1.41777			1.0122					1.05564	0.800522			0.68527			0.505717					1.07137			0.610646	0.612857
ABI1	54	1.3136	1.30675	1.20572	0.855858	0.922728	0.869361	0.863437	0.837512	0.851778	1.38958	1.47175	1.32467	1.05639	1.02704	1.08228	1.16613	1.15316	1.07554	0.91225	0.959794	0.953163	1.04968	1.1055	1.07907	0.990598	1.01729	1.01607	1.17863	1.17475	1.11608	1.32388	1.31171	1.3098	0.92197	0.930173	0.932968	0.957097	0.932903	0.972475	0.879969	0.898726	0.902407	0.74792	0.726109	0.726633	0.902843	0.927112	0.896394
ABI2	54	0.986284	1.03014	0.989559	0.827638	0.833144	0.736815	1.64844	1.68009	1.61834	0.816017	0.866242	0.920968	1.0522	0.903216	1.00072	0.902055	0.894489	0.981715	0.833271	0.93505	0.807628	1.01107	0.946814	0.969326	0.720732	0.765466	0.693165	0.978076	1.02528	0.996945	0.675955	0.679247	0.512323	1.31234	1.37873	1.49379	1.28117	1.25043	1.3004	1.26485	1.26587	1.14709	1.67738	1.67777	1.50562	1.00923	0.985301	0.974846
ABI3BP	27				4.31552	4.63112	4.32381							0.720401	0.522225	0.674877				0.814432	0.631273	0.913376	0.729392	0.856626	0.656627	0.652783	0.606212	0.684677				0.59744	0.475343	0.5493	0.96763	0.673293	0.72348	0.775187	0.66566	0.589854							0.839831	0.755463	0.855561
ABL1	54	1.22344	1.36664	1.21166	1.29364	1.25464	1.21417	1.00642	1.08585	1.01252	0.997253	1.0543	1.00489	1.36984	1.42846	1.32721	1.0144	1.03287	1.03319	0.935599	0.918969	0.962181	0.962124	0.950242	0.949346	0.997473	1.03155	0.968	0.884014	0.881329	0.849233	0.97734	0.986018	0.934063	0.933574	0.989233	0.965657	1.21189	1.24518	1.24174	1.1357	1.21199	1.08929	1.19062	1.22918	1.24913	0.927678	0.927699	0.920781
ABL2	54	1.02985	1.11638	1.02323	1.48057	1.50741	1.58042	0.902121	0.934294	0.94518	0.902398	0.781722	0.881683	1.2679	1.29372	1.31394	0.939651	0.807743	0.895394	1.23156	1.11385	1.22308	0.940591	0.938434	1.01437	1.10859	1.13909	1.17004	0.991288	0.878438	0.953325	0.83201	0.79469	0.813378	1.09492	1.06988	1.15806	0.805152	0.764634	0.922849	0.778293	0.776949	0.786082	1.03755	1.05741	1.01735	0.9811	0.966549	1.01651
ABLIM1	54	0.598743	0.503802	0.550753	0.715054	0.923727	0.668135	1.55999	1.71364	1.7744	0.988913	0.945704	1.00693	2.38429	2.71047	2.23355	1.44512	1.30383	1.35035	0.737489	0.732956	0.598461	1.13499	1.04607	1.06697	0.875928	0.954062	0.783985	0.695212	0.678313	0.649749	1.26579	1.30269	1.2257	0.626824	0.669543	0.591821	0.4721	0.555075	0.492847	0.573458	0.432456	0.508289	0.581481	0.533664	0.603026	1.26523	1.41458	1.39184
ABLIM2	54	0.409965	0.723325	0.214437	0.705176	0.755526	0.789597	0.512942	0.753827	0.374459	1.63231	1.75846	3.54926	1.56886	1.69274	1.6157	0.481799	0.580089	0.251782	0.82844	1.06218	0.769719	0.990434	0.980234	0.938573	0.898289	0.854712	0.831749	0.416878	0.927336	0.29212	1.70034	1.63802	1.5351	1.06601	1.07983	1.05839	1.60035	1.50592	1.52428	1.79757	1.38741	2.40626	0.425306	0.652996	0.201802	0.692238	0.522506	0.622427
ABLIM3	54	1.15656	1.45745	1.61666	0.362876	0.574995	0.593962	0.771876	0.435607	0.513923	0.984326	0.99031	0.871467	0.565812	0.542618	0.658951	0.789714	0.44548	0.534301	0.483353	0.696085	0.744076	2.53485	2.10532	1.44375	1.31169	1.26042	1.10676	0.975927	1.53167	1.5609	1.37538	1.08553	1.37646	1.48509	1.49233	1.10038	1.24431	1.1259	1.02603	0.715247	0.626304	0.636719	1.1277	1.17845	1.36719	0.472058	0.578877	0.723077
ABO	18	0.298221		0.527372				0.365229		0.496817	2.45294		1.77318				0.350053		0.562166										6.26872		4.89807										0.31587		0.514591	0.308922		0.596261
ABR	54	1.16672	1.26668	1.19713	0.898373	0.928842	0.910049	0.770914	0.750335	0.747685	1.51326	1.56338	1.48251	0.678956	0.700187	0.805291	1.049	1.03076	1.01635	0.699333	0.718904	0.717442	0.856637	0.947923	0.955837	0.730066	0.734159	0.691009	1.03253	1.10199	1.07142	0.736508	0.707198	0.741302	1.07148	1.04454	1.07229	1.65401	1.61204	1.60126	1.33059	1.44174	1.36005	1.17536	1.19809	1.13951	0.595021	0.549747	0.527258
ABRACL	54	1.0335	1.02214	1.28279	1.14493	1.49376	1.35324	0.702763	0.657532	0.697952	2.0115	1.58285	1.69165	2.10825	1.93837	1.99715	1.32932	1.45368	1.36843	0.500141	0.769205	0.612624	1.19126	1.26953	1.23591	0.928044	1.3393	0.889629	1.62376	1.25667	1.2552	1.5786	1.66846	1.69028	1.46941	1.54026	1.36547	1.34696	1.46512	1.37529	1.40319	1.27907	1.23506	0.496703	0.520039	0.507348	1.44148	1.723	1.35253
ABT1	54	1.09421	1.03407	1.07611	1.24305	1.0957	1.09911	1.31279	1.42114	1.54792	0.826898	0.649018	0.711309	1.11013	1.04654	1.04954	0.90043	0.997041	0.921023	1.19653	1.14251	1.23511	1.17152	1.01384	1.04312	1.18443	1.0859	1.13015	1.12383	1.0526	1.03145	0.9624	0.862599	0.897118	1.11078	1.00508	1.09791	1.0858	1.05682	1.13301	1.15947	1.23886	1.18691	0.749766	0.953855	0.83343	1.05842	0.962818	1.12112
ABTB1	54	1.21748	1.13127	1.2922	0.727583	0.817617	1.11291	0.884089	0.896575	0.854775	1.87229	2.18502	2.17117	0.569758	0.585309	0.909049	0.770329	0.83723	0.820169	1.13849	1.1545	1.1114	1.00506	0.856437	0.999125	0.569295	0.513357	0.768951	0.791708	0.827944	0.72719	1.15548	1.44663	1.1183	1.03188	0.808338	0.930374	1.08915	1.10985	1.10121	1.06131	0.956282	0.901658	1.20122	1.24069	1.4476	0.845804	1.00185	0.824962
ABTB2	54	1.19739	1.21806	1.34879	1.1144	1.14348	1.01703	0.948253	0.96253	0.986375	1.6185	1.61321	1.38542	1.08417	1.25119	1.13018	0.721974	0.806813	0.760444	0.927266	1.0136	1.01214	0.787792	0.568583	0.742091	0.955633	0.991935	0.99373	0.855783	0.852698	0.880785	0.681386	0.477765	0.76311	0.780837	0.862592	0.855693	0.606671	0.589322	0.734757	0.671543	0.602049	0.690443	0.634236	0.639678	0.624069	1.25028	1.37119	1.12414
ACAA1	54	0.52575	0.514272	0.521677	0.635954	0.636363	0.637178	0.494008	0.504381	0.51414	0.791104	0.790617	0.838678	0.676436	0.712523	0.68721	1.01923	1.03743	1.03241	0.785807	0.783712	0.738945	0.693494	0.694645	0.687204	0.80828	0.803315	0.787384	0.703951	0.695545	0.712232	0.948027	0.914887	0.894154	0.994448	0.997068	0.923162	0.809941	0.817454	0.770128	0.751799	0.755351	0.748089	0.6859	0.649235	0.671354	4.87299	4.39059	4.80314
ACAA2	54	0.805416	0.807236	0.847656	1.16424	1.09674	1.06848	1.40566	1.44776	1.44582	0.630529	0.655007	0.687186	2.14979	2.20231	2.27456	0.379929	0.342069	0.359296	1.45304	1.35984	1.44825	0.897858	0.836922	0.870345	0.484533	0.533804	0.481439	0.908924	0.873179	0.895618	0.991702	1.02835	1.0206	1.16986	1.21615	1.20922	0.698755	0.710349	0.723878	0.667613	0.667232	0.652463	0.96247	0.946595	0.946565	0.932838	1.01886	0.958873
ACACA	54	0.624688	0.58884	0.648553	1.08572	1.12461	1.11139	1.20735	1.24912	1.16974	0.715087	0.632964	0.735382	1.27414	1.29887	1.30917	1.04294	1.04643	1.02686	1.10319	1.14376	1.12341	1.15373	1.16454	1.19269	1.00035	1.01122	1.0133	1.08488	1.12466	1.10616	0.954057	0.957511	0.972334	0.84519	0.858332	0.864499	0.79728	0.794932	0.80383	0.752603	0.750154	0.752044	0.823853	0.821934	0.822994	0.806281	0.840887	0.842274
ACACB	45	0.926535	0.72873	1.09775	0.991244	0.750489		0.906997	0.647071	0.983974	0.872201	0.595869	0.933151	1.12632	0.782056		3.06508	3.08327	2.36508	1.62543	0.94383		0.987549	0.799114		0.678933	0.698532		1.07675	0.874095	1.02051	1.01486	0.693553		0.831178	1.44418		0.692979	1.04047		1.09881	1.25667	1.13986	0.886502	0.507397	0.772798	0.843098	0.948753
ACAD10	54	0.743926	0.634906	0.751001	0.95088	0.780495	0.864647	0.906922	0.81353	0.887959	0.654115	0.71501	0.745607	0.757652	0.615193	0.705531	0.976848	0.8878	1.01882	1.35686	1.41513	1.35498	1.04692	1.00486	1.02066	0.726761	0.604905	0.587362	0.62573	0.577322	0.652313	1.33543	1.27044	1.33723	1.18517	1.0949	1.27931	1.24402	1.15621	1.21605	0.906616	0.94703	0.977741	0.894063	0.935897	0.940192	0.935906	0.925932	1.05062
ACAD11	54	0.814476	0.737105	0.701972	2.15367	1.8444	1.96857	1.04321	1.13149	1.02034	0.790189	0.681655	0.766527	0.574181	0.599744	0.657803	1.17213	1.07245	1.13695	1.04466	1.04278	1.02845	0.939012	1.00573	1.0083	0.582183	0.530965	0.666955	1.19457	1.36863	1.21456	0.806416	0.748082	0.812061	0.782349	0.734505	0.79085	1.48745	1.60373	1.31855	1.07803	1.07006	0.98937	1.07371	1.13673	1.06518	0.867025	0.890323	0.986137
ACAD8	54	1.33761	1.34386	1.33647	0.83715	0.790948	0.655955	0.876156	0.932009	0.88071	0.573262	0.626941	0.68174	1.52942	1.46208	1.44798	0.73445	0.901493	0.840099	1.39855	1.408	1.32288	1.34565	1.31469	1.29776	0.705603	0.711508	0.626796	0.575014	0.645579	0.686901	0.979573	0.973971	0.939678	0.904533	0.850886	0.822219	0.857477	0.878756	0.825582	0.983073	0.994223	0.987752	0.891311	0.89214	0.865744	1.16758	1.05015	1.11796
ACAD9	54	1.08323	1.032	1.04858	1.0741	0.907602	0.967595	0.805062	0.845043	0.838091	0.970209	0.944444	0.948567	0.850861	0.74397	0.825059	1.27279	1.28047	1.27622	1.31259	1.26402	1.31086	1.30559	1.28935	1.32362	0.845428	0.810846	0.840344	0.853809	0.825011	0.858356	1.35041	1.30991	1.38806	1.02853	0.991544	1.02145	1.0924	1.10005	1.07251	1.07502	1.1001	1.09264	0.801706	0.816253	0.858949	1.02917	1.04854	1.03086
ACADM	54	0.752958	0.702227	0.734302	1.11723	1.02894	1.05678	1.27601	1.33054	1.28897	0.791508	0.768831	0.798439	1.23832	1.28995	1.28002	0.97693	1.00737	1.03303	0.806133	0.840497	0.846546	1.16113	1.05493	1.09562	0.832279	0.86548	0.820311	1.17475	1.24814	1.20956	2.59145	2.54989	2.8772	0.793415	0.798867	0.763717	0.60947	0.626183	0.577528	0.611102	0.530799	0.580536	0.873169	0.942072	0.921851	1.23906	1.22075	1.29402
ACADS	54	0.457025	0.437362	0.397503	0.691933	0.54718	0.548256	1.48057	1.47518	1.43218	1.74241	1.60803	1.62508	0.669059	0.459451	0.498984	0.484503	0.529441	0.542262	1.46135	1.46431	1.364	1.52036	1.64818	1.62991	0.511484	0.502739	0.403102	0.751236	0.771684	0.756394	1.418	1.26406	1.31462	0.744544	0.710099	0.741497	1.49265	1.42815	1.39877	1.46179	1.38161	1.45614	1.68479	1.56488	1.56257	0.50459	0.404663	0.408733
ACADSB	54	0.69948	0.618594	0.715935	0.541287	0.4105	0.42816	1.01603	1.0053	1.0247	0.677008	0.631448	0.694303	0.466218	0.438206	0.499605	4.60979	4.55793	4.43749	1.07705	1.09776	1.09268	1.10453	1.09116	1.09047	0.627565	0.608319	0.622315	0.714234	0.661733	0.738806	0.616948	0.621789	0.581565	1.42265	1.37907	1.48385	1.05362	1.03861	1.09205	1.04217	1.0522	0.997183	0.723549	0.731636	0.761458	0.485442	0.494251	0.410512
ACADVL	54	1.12989	1.15059	1.13897	1.06936	0.944274	0.964524	0.636026	0.581965	0.625959	1.02331	1.04911	1.01464	0.629813	0.614749	0.629895	1.41515	1.47565	1.42542	0.955024	0.959383	0.949321	1.20133	1.2237	1.17401	0.941258	0.942953	0.943136	1.12851	1.17001	1.16575	0.969211	0.932381	0.948155	0.833399	0.820841	0.809104	1.03105	1.03922	0.988625	0.956558	0.930759	0.949663	1.19638	1.23071	1.1994	1.52683	1.53508	1.50045
ACAP2	54	1.12919	1.11615	1.14185	0.708416	0.743531	0.659258	0.951339	0.948	0.959297	1.11024	1.17735	1.13214	0.767563	0.759068	0.782342	1.05488	1.01764	1.05735	0.765987	0.822985	0.745155	1.49118	1.39262	1.49896	0.947192	0.97106	0.961618	0.838173	0.855471	0.843735	0.989692	0.97501	0.983883	1.11588	1.16569	1.15918	0.920369	0.909677	0.955338	0.83561	0.770336	0.787098	0.838257	0.832329	0.842328	1.17215	1.22644	1.20244
ACAP3	54	1.05202	0.632105	0.777746	1.0798	0.857303	0.982589	0.896735	0.659771	0.685315	0.993561	0.944941	0.930305	1.29511	1.44329	1.37312	1.46527	1.65283	1.72082	0.886266	0.79419	0.703298	0.870069	0.724114	0.788965	0.801068	0.77464	0.839813	0.86582	0.900217	0.7594	1.45226	1.52722	1.58229	0.704493	0.759597	0.698865	1.01551	0.907733	1.0133	0.902112	1.01547	0.929816	1.4133	1.37571	1.33168	0.754513	0.864961	0.88956
ACAT1	54	0.995487	1.0253	1.02492	1.67914	1.36188	1.42329	1.0141	0.986338	1.02167	0.710699	0.731888	0.759935	0.515754	0.525283	0.531888	0.874619	0.889175	0.915936	1.9608	1.75269	1.81648	0.898289	0.900433	0.856037	0.76335	0.699723	0.762782	0.844377	0.859912	0.874446	0.868101	0.817286	0.844801	0.825423	0.79313	0.806376	0.636482	0.614752	0.624404	0.581437	0.574888	0.616768	1.18613	1.17039	1.17059	2.04796	1.81334	1.96675
ACAT2	54	1.12636	1.12501	1.16717	1.00519	1.1773	1.13025	0.849612	0.860608	0.857325	1.12557	1.14402	1.17102	1.16384	1.23849	1.21069	0.977104	1.00581	0.963406	1.09802	1.11467	1.08637	0.915209	0.914613	0.953248	0.838607	0.773812	0.833307	0.835823	0.815211	0.856601	1.51408	1.41897	1.45528	0.723429	0.677861	0.719416	0.913741	0.949195	0.955753	0.886186	0.866958	0.88537	0.934034	0.898494	0.931647	0.759968	0.737314	0.739525
ACBD3	54	0.858508	0.777945	0.81023	0.854028	0.87433	0.924414	0.796961	0.715438	0.793158	0.94193	0.944738	0.897467	1.10635	1.09895	1.08079	1.37538	1.49589	1.44061	1.16125	1.11899	1.14381	0.994478	0.963273	0.993279	1.0059	1.01116	1.01365	1.15833	1.19905	1.17134	1.05743	1.02697	1.05652	0.858324	0.886566	0.873957	0.873312	0.845227	0.873629	0.914615	0.879218	0.903994	1.31545	1.39343	1.27155	0.991179	1.01375	0.994288
ACBD4	27	0.848102	0.68296	0.976405				0.920112	0.80079	0.850924	1.7347	1.38615	1.36388				1.33341	1.34612	1.57041										1.15588	1.10687	0.892331										0.772562	0.517523	0.931346	1.05838	0.906649	1.00402
ACBD5	54	1.24014	1.33251	1.23838	0.827206	0.756518	0.798713	0.682406	0.665522	0.705749	1.04739	1.07266	1.02041	0.703548	0.695106	0.716041	1.26246	1.25531	1.31447	1.30633	1.26159	1.35338	0.933856	0.895791	0.936144	0.949287	0.939623	0.96478	1.2755	1.35526	1.32205	1.42842	1.43685	1.4885	1.07047	1.08499	1.04345	1.2243	1.2564	1.24887	1.12709	1.15051	1.10706	0.631233	0.583393	0.695198	1.02672	1.02134	1.00707
ACBD6	54	1.23079	1.21571	1.17683	1.06321	1.10998	0.937443	1.15207	1.19329	1.1845	0.859411	0.773472	0.755839	0.845895	0.740309	0.767114	0.845015	0.675086	0.735969	1.17721	1.18807	1.1295	0.943023	1.02952	0.896437	0.892229	0.981679	0.960486	1.10448	1.15042	1.14771	0.800691	0.729204	0.740104	1.11349	1.1777	1.0792	0.989239	0.86921	0.889002	0.927241	0.936135	0.946468	1.4423	1.6225	1.41508	0.912559	0.974185	0.851533
ACBD7	54	0.837763	0.842529	0.908224	0.423267	0.506234	0.525284	0.676573	0.567663	0.693833	0.985491	1.00279	0.847593	1.96166	2.1773	1.86827	1.05481	0.912232	0.933979	0.396386	0.408756	0.414785	0.731096	0.676506	0.712788	0.62787	0.639845	0.553615	1.14339	1.11536	1.18626	0.723591	0.546455	0.605911	1.46212	1.65506	1.53454	1.57181	1.64458	1.66131	1.62538	1.84653	1.69033	0.910553	0.890737	0.879198	0.770979	0.791105	0.863523
ACCS	36	0.804613		1.03397		0.963444	0.900664	1.01661		1.26165	1.06005		0.936018		1.01073	1.02991	1.17845		0.939825		1.0333	0.885268		1.03108	0.983095		0.958779	0.851704	0.772046		0.898465		0.917124	0.978384		1.15591	0.979984		1.2221	0.929665	1.10043		1.14798	1.42671		1.37843		1.4684	1.16377
ACD	54	1.40984	1.53353	1.4917	1.11878	1.12893	1.22283	1.11473	1.22198	1.20785	1.00747	0.952079	0.903791	0.955885	0.956697	0.888883	0.861409	0.91859	0.698478	0.892058	0.944918	0.913575	1.24253	1.34137	1.18128	1.08008	1.38102	1.12737	1.13642	1.18661	1.19366	0.960704	1.16229	0.98923	0.966894	1.06909	1.05853	0.962204	1.06564	0.998463	1.04876	1.23546	1.15557	1.02583	0.903569	1.00967	0.727265	1.04063	0.911151
ACE	54	0.450938	0.365971	0.418966	0.85478	0.580467	0.576815	0.497846	0.388723	0.445591	2.012	2.99483	2.37249	0.791414	0.364407	0.636191	0.629508	0.451986	0.674499	0.77265	0.78295	0.764149	0.925579	0.898403	0.94196	0.736726	0.368342	0.395564	2.56266	3.09998	2.81168	2.62449	2.46973	2.33615	0.671341	0.531473	0.61279	0.664323	0.366185	0.388639	0.526487	0.314323	0.525057	0.519465	0.316806	0.495033	0.585018	0.312207	0.387378
ACE2	45	1.10047		1.11488	0.571565	0.467743	0.55123	3.5884		2.34699	0.621605		0.778848	0.857804	0.59625	1.08168	0.522524		0.639385	0.624309	0.950071	0.750594	5.6827	4.49495	3.64235	1.9728	2.10264	1.6871	0.528323		0.734454	0.726529	0.649902	0.85579	0.637779	0.35033	0.712971	0.732648	0.685933	0.757001	0.656276		0.762514	0.440306		0.536405	0.661267	0.533182	1.09732
ACHE	9		1.03737						0.844407			0.979862						0.994322												0.847461												0.703456			2.66517
ACIN1	54	0.971154	0.953462	0.962641	1.22918	1.14233	1.16143	1.12194	1.1468	1.1477	0.984669	0.990655	0.982385	1.17475	1.12541	1.17575	1.02461	1.00923	1.03963	1.11985	1.07235	1.1159	1.04735	1.02667	1.04258	1.05416	1.07325	1.0775	0.881763	0.886007	0.888267	1.10503	1.10658	1.12279	1.18639	1.17678	1.23212	1.15339	1.14633	1.16119	1.20811	1.21745	1.18027	1.04506	1.08439	1.06379	0.976598	0.959353	0.985695
ACKR2	54	1.6182	2.59083	4.29852	0.701986	1.04074	0.955183	0.885504	0.913819	0.997548	0.988207	0.816169	0.857017	1.11377	1.15152	1.1345	0.921661	0.674971	0.924521	0.831292	0.922907	1.1557	1.6349	1.25017	1.12434	3.27834	1.55235	2.81806	0.697109	0.457674	0.680949	1.82186	1.16344	1.40101	0.593584	0.542903	0.858606	0.520151	0.803462	0.758533	0.837903	0.586663	0.635312	0.645351	0.722086	0.618183	0.744713	1.57027	0.902004
ACKR3	45	0.713915	0.619091	0.676494	2.73168		2.69444	0.934255	0.75837	0.692956	0.594617	0.250928	0.347573	0.546804		0.185872	1.72183	2.26753	1.88974	0.592248		0.200833	0.432119		0.11978	0.562678		0.220685	0.654586	0.18704	0.332182	0.560138		0.231839	1.45742		1.32927	2.28946		2.29434	4.23803	6.92831	4.98399	1.17066	1.63323	1.42136	0.44998		0.143336
ACLY	54	0.832255	0.816357	0.829522	1.04026	1.0513	1.05331	0.807823	0.804829	0.833308	0.729992	0.709129	0.752865	0.938212	0.968881	0.953224	0.926831	0.92732	0.931142	0.940475	0.933063	0.920276	0.886682	0.904826	0.875904	0.957271	0.96744	0.952344	1.09402	1.11203	1.09508	0.795567	0.809596	0.791974	1.32498	1.31154	1.32381	0.835101	0.831365	0.821634	0.847794	0.828685	0.858508	1.0931	1.08566	1.07683	1.86624	1.84559	1.9036
ACN9	45	0.754582	0.796921		1.32093	1.47913	1.35375	1.30986	1.22971		0.764742	0.660929		1.17219	1.65347	1.42275	0.474366	0.36553		1.00683	0.922807	1.00115	1.20999	1.30851	1.4055	1.33794	1.81633	1.44858	1.4595	1.35031		1.0376	1.20209	1.0937	0.686635	0.762445	0.486557	0.616986	0.464269	0.525164	0.344606	0.41224		1.00794	1.01094		1.63286	2.60496	1.97505
ACO1	54	1.07787	1.02666	1.03688	1.132	1.21484	1.19322	0.907015	0.842754	0.860159	1.18905	1.17537	1.15014	0.823821	0.822773	0.791679	1.28172	1.27923	1.24327	1.48841	1.51931	1.47863	0.952805	0.909406	0.948535	0.906678	0.854838	0.901838	0.795671	0.797444	0.743593	1.63429	1.66558	1.70851	0.583979	0.491401	0.495091	1.07953	1.0506	1.0768	0.957873	0.90671	0.952103	0.915213	0.909147	0.908132	0.568248	0.528885	0.447447
ACO2	54	0.7108	0.697798	0.71649	1.04418	0.874505	0.949402	0.859974	0.8467	0.850328	0.951341	0.950243	0.967282	0.848955	0.819179	0.852671	1.27874	1.24646	1.24636	1.7351	1.58971	1.74699	1.10114	1.03549	1.0875	0.796244	0.764084	0.780691	0.715026	0.717268	0.726522	1.15588	1.09082	1.16431	1.07344	1.05085	1.11982	1.12418	1.09214	1.12647	0.979432	0.959349	0.984865	1.15342	1.16832	1.13586	1.3571	1.32532	1.45161
ACOT1	54	0.909622	0.78148	0.791875	1.80726	1.53434	1.337	0.754622	0.810581	0.540664	0.91251	0.708941	0.805272	0.692056	0.776155	0.921837	1.58656	1.4222	2.50667	1.06751	0.875017	1.08267	0.845293	0.894638	0.770023	0.797017	0.642856	0.711454	0.661316	0.573045	0.705674	0.800833	0.681963	0.842745	1.07015	0.943344	1.02888	1.60211	1.01625	1.07011	1.07586	1.3	0.732471	1.82779	1.65106	1.11881	1.69808	2.16962	1.25776
ACOT11	54	1.07251	0.981511	0.974519	0.627951	0.67923	0.826741	0.483245	0.396712	0.640541	0.524977	0.441144	0.570877	0.669943	0.674733	0.83701	0.780504	0.694166	0.759732	0.717439	0.854984	0.82985	2.17115	1.68681	1.80569	0.877483	0.834803	0.944929	0.803827	0.654946	0.804752	3.38946	3.02742	2.46196	0.727286	0.618445	0.730244	0.794847	0.745423	0.926014	0.622505	0.467965	0.545636	0.635682	0.440063	0.51622	0.879935	0.738515	0.895558
ACOT13	54	0.608336	0.511235	0.645278	1.42214	1.18065	1.2607	1.17429	1.04121	1.10441	0.680904	0.563877	0.65977	1.19622	1.12725	1.19446	1.50955	1.51756	1.63492	1.25929	1.15192	1.24871	0.962242	0.981087	0.931781	1.04833	0.979696	1.0552	0.914696	0.821728	0.861215	0.958374	0.879672	1.02533	0.954682	0.976944	0.924218	1.03341	1.03128	1.03772	0.991309	1.0049	1.02488	0.935732	0.873808	0.916942	1.25311	1.25243	1.22339
ACOT2	54	0.83239	0.755918	0.959371	1.88538	1.59611	1.68963	0.821008	0.535839	0.696354	0.618695	0.665293	0.746975	0.613436	0.739001	0.643403	0.946767	1.12351	1.19442	0.954318	0.907196	0.91398	0.61996	0.881691	0.704026	0.729022	0.712336	0.436043	0.722215	0.706424	0.692559	0.734645	0.834902	0.852106	0.677412	1.07476	0.739449	1.18885	1.24909	1.03171	0.848073	0.866522	0.987685	1.08735	1.52518	1.4674	1.18279	1.31869	1.23047
ACOT4	54	1.30582	1.30825	1.62573	0.874885	0.43562	0.510553	0.670707	0.84837	0.806946	1.21773	0.729309	0.989619	1.01251	0.874034	0.809379	1.82794	2.4021	2.71833	0.781066	0.550094	0.530333	1.60394	1.09006	1.47683	0.646379	0.290365	0.329169	1.13048	0.804245	1.02891	0.753844	0.593459	0.474505	0.858427	0.424242	0.405875	0.8012	0.220583	0.352886	0.319087	0.857872	0.525299	1.07771	0.92753	1.20397	1.31475	1.05216	0.907174
ACOT7	54	0.824687	0.81766	0.834525	1.10131	1.15949	1.15418	0.936619	0.881726	0.88087	1.3962	1.39097	1.36159	0.90619	0.911245	0.901209	0.969808	0.969214	0.915625	0.638533	0.621139	0.56876	1.11202	1.179	1.18385	1.1822	1.24363	1.207	1.24953	1.20414	1.18133	1.15647	1.18157	1.12314	0.831225	0.841805	0.809036	1.0684	1.09255	1.0578	0.948145	0.953032	0.926404	1.09877	1.02008	1.06911	1.15885	1.23344	1.2597
ACOT8	54	1.18994	1.23447	1.16893	0.998123	0.915995	0.944989	0.516159	0.536748	0.549181	0.829282	0.886153	0.802277	0.635046	0.660367	0.640429	2.18447	2.35376	2.19279	1.19046	1.08579	0.9943	0.99449	1.05237	1.07475	0.756719	0.761985	0.83532	0.848629	0.882925	0.843332	1.01292	0.971143	1.01509	0.818814	0.845346	0.734019	0.862543	0.854313	0.814259	0.874977	0.813962	0.806223	1.05278	1.02839	1.08804	1.66787	1.73945	1.6787
ACOT9	54	1.09076	1.12782	1.11859	1.58607	1.54079	1.43263	0.89159	0.784405	0.856308	0.781065	0.68768	0.772048	0.671414	0.800942	0.729777	0.706613	0.693516	0.747759	0.590791	0.598281	0.530692	1.07875	1.06526	1.03038	1.61599	1.49467	1.50069	0.774957	0.755026	0.794816	1.04049	1.01486	1.03807	0.852751	0.851265	0.830629	0.879012	0.852521	0.852444	0.748819	0.732837	0.803861	2.34328	2.6541	2.29949	0.775314	0.778447	0.770853
ACOX1	54	1.1328	1.14633	1.14263	0.743762	0.652477	0.658459	0.653936	0.641306	0.614083	0.86768	0.877312	0.812255	0.942399	0.954985	0.94157	1.68715	1.59033	1.60246	0.909697	0.886136	0.878745	0.885345	0.835268	0.86071	1.14046	1.10367	1.13223	0.428602	0.399908	0.354914	1.08229	1.07828	1.06813	1.03263	1.02582	1.00381	0.809029	0.826333	0.821961	0.816958	0.833765	0.813656	1.53465	1.55773	1.51056	1.79214	1.77977	1.79874
ACOX2	27	0.490984	0.763261	0.595314				7.57971	2.04634	3.38018	1	0.932835	1.28647				0.877967	1.46599	2.3638										0.546161	0.645464	0.885782										0.630711	0.790022	0.653752	1.16181	0.850967	1.10144
ACOX3	54	0.826414	0.771455	0.774118	0.837711	0.776673	0.786361	0.716827	0.734474	0.705923	0.471503	0.504561	0.559336	1.1972	1.19455	1.24136	2.97433	3.41051	3.28057	0.787249	0.738087	0.68248	0.763455	0.734165	0.750248	0.847915	0.84366	0.856241	0.753507	0.752919	0.780795	1.1811	1.18828	1.18668	1.1292	1.19694	1.20952	1.32603	1.43161	1.33476	1.29828	1.32381	1.28028	0.808374	0.915208	0.879583	0.647924	0.623602	0.662145
ACP1	54	1.22037	1.16179	1.28624	0.688652	0.749674	0.768323	0.929679	0.869752	0.95174	1.11064	1.03553	1.16738	0.87689	0.873176	0.927732	0.557969	0.75082	0.687669	0.90372	0.949871	0.967322	0.838237	0.907826	0.981732	1.01305	0.991234	0.969466	1.20072	1.18018	1.19333	0.887113	0.902039	0.9014	1.24484	1.30691	1.11332	1.28839	1.17953	1.15716	1.13263	1.10836	1.10839	1.02067	0.964282	1.0249	1.10863	1.12348	0.979157
ACP2	54	0.868051	0.804924	0.855352	1.11055	1.1901	1.094	0.851371	0.856561	0.843426	0.617634	0.59381	0.689891	1.70326	1.69349	1.60583	1.7604	1.61504	1.63325	0.756889	0.782432	0.798217	0.735146	0.829713	0.703316	0.695616	0.881729	0.749471	1.07032	1.07224	1.06908	0.877937	0.804078	0.793267	0.845736	0.825715	0.913972	0.829291	0.850658	0.844215	0.941275	0.953038	0.914865	0.992716	1.01138	1.02203	1.33008	1.33441	1.28476
ACP6	9						0.626062									0.597275						0.564473			1.05608			0.427134						7.39531			0.547934			0.641479									0.991413
ACPL2	36	0.54505	0.643789	0.822908	0.743152			1.47338	0.681062	1.44805	0.938473	0.903761	0.950518	1.42195			0.462569	0.705124	0.601192	0.932373			0.920943			0.809318			0.78536	0.765051	0.722224	1.04441			0.816401			0.830037			0.769371	0.804302	0.739402	0.79156	0.877451	0.587983	0.631006
ACPP	54	1.37157	0.944862	1.43954	0.53718	0.6038	0.510623	0.828629	0.862606	0.654661	0.75328	0.479618	0.561138	0.566886	0.621752	0.683197	2.93785	2.94274	2.68141	0.86181	0.997243	0.86369	0.805338	0.801509	1.01286	1.15435	1.07269	1.02066	0.639702	0.56599	0.552486	2.22295	1.80684	1.73575	1.54083	1.42771	1.39047	1.32379	1.31208	1.1512	0.78718	1.0417	0.683973	0.565853	0.792007	0.493663	0.685909	0.873997	0.739536
ACSF2	54	1.06043	1.05256	1.04901	0.644023	0.535865	0.5954	0.562231	0.536637	0.587248	1.2709	1.29321	1.22882	0.950817	0.896222	0.964128	1.1712	1.08545	1.12609	2.04363	2.03752	2.14798	1.06441	1.00323	1.07785	0.795755	0.742923	0.761974	0.752262	0.726161	0.754692	1.09039	0.963759	1.08462	0.985093	0.959891	0.953585	1.00478	0.96775	0.988913	1.04415	1.03959	1.00881	1.11767	1.12459	1.07767	1.29522	1.22069	1.32213
ACSF3	54	1.06887	1.06159	1.12897	1.06326	0.857415	0.909467	0.992394	1.00298	0.98146	0.943584	0.878699	0.872917	0.707706	0.647456	0.684347	1.15081	1.19491	1.17878	0.810195	0.808013	0.834308	1.09586	1.09833	1.10671	0.91446	0.921474	0.865983	0.75987	0.788874	0.796496	1.07312	1.27737	1.13364	1.42586	1.60576	1.51523	1.40161	1.5798	1.48953	1.41899	1.63361	1.59315	0.695852	0.747823	0.701584	0.57925	0.550098	0.522417
ACSL1	54	0.996493	1.02739	1.05696	0.843198	0.699396	0.749258	0.566135	0.502648	0.611892	0.801372	0.754698	0.79155	0.638275	0.551449	0.650526	2.7015	2.86864	2.52002	1.62188	1.56842	1.61226	1.06875	0.99473	1.04711	0.891672	0.794557	0.892937	0.954638	0.954571	0.97141	1.62656	1.5459	1.6849	0.539552	0.486751	0.519602	0.591936	0.503699	0.555323	0.601047	0.562293	0.654347	0.583806	0.58683	0.654043	1.27228	1.23759	1.20989
ACSL3	54	0.792826	0.764722	0.792049	0.949776	0.882671	0.859377	0.747638	0.731972	0.749474	1.29477	1.36202	1.29288	1.17026	1.14245	1.16561	2.35086	2.40954	2.31833	1.16333	1.09842	1.13709	0.957145	0.944393	0.963186	0.9699	0.939602	0.938344	1.20777	1.31187	1.22905	0.990898	0.976973	1.0304	0.637771	0.634291	0.610643	0.502496	0.550484	0.481107	0.588778	0.564114	0.604378	0.707368	0.721103	0.752405	1.3836	1.32598	1.37217
ACSL4	54	1.59347	1.69242	1.70892	4.32533	4.56603	4.30508	0.471416	0.472704	0.452166	0.621386	0.617003	0.638612	0.61466	0.710855	0.626822	0.364555	0.434709	0.369113	1.38231	1.2161	1.2829	0.899342	0.918375	0.901299	1.02646	0.990446	0.992106	1.07315	1.10248	1.10438	0.955129	0.928591	0.965197	0.484338	0.457222	0.475572	0.33391	0.363812	0.361821	0.289845	0.283047	0.28246	1.13672	1.14841	1.21124	0.386803	0.362284	0.365525
ACSL5	45	0.356681		0.445916	0.820806	0.761928	0.7322	0.16927		0.171417	0.135701		0.260154	1.8526	1.93592	2.03556	0.192708		0.258985	0.606987	0.594601	0.53275	1.96502	2.20151	1.96674	0.896801	1.04664	0.933861	0.373412		0.439432	3.16735	3.37946	3.13593	0.663424	0.582799	0.52915	0.566705	0.509776	0.453403	0.171405		0.178847	0.186193		0.355665	1.962	2.28897	1.84859
ACSL6	45	0.722667	0.799817	0.814329	0.58612	0.592679		0.602806	0.686491	0.673293	0.777558	1.1497	1.31414	1.13318	1.24661		0.679965	1.61946	1.45414	2.10215	2.20284		0.818055	0.92154		0.759242	0.680301		0.840898	0.935065	0.963565	0.697432	0.604975		1.58414	0.455505		1.52496	0.745224		0.413158	0.747262	0.721527	1.1138	1.0028	0.94857	1.16882	0.902451
ACSM3	45	0.582777	0.636373	0.712835	1.43573	0.607539		2.34286	1.87354	2.18795	0.719279	0.735191	0.697938	1.44106	1.85825		1.67133	1.58606	1.82961	1.3632	1.45426		0.958957	0.702752		0.825396	0.616749		0.694606	0.7038	0.790845	1.33411	0.526546		0.56227	0.661061		0.596018	0.612431		0.49698	0.50847	0.600885	1.01237	0.923621	1.12062	0.888834	0.953544
ACSS1	54	0.564808	0.40361	0.504924	0.676848	0.416856	0.515766	0.523993	0.470345	0.460107	0.755564	0.654801	0.650906	0.591172	0.400525	0.419044	3.98662	4.02403	3.9177	3.16496	3.08119	3.55512	0.557735	0.453123	0.395922	0.514335	0.349448	0.448859	0.656533	0.59179	0.666764	0.518022	0.414349	0.4024	0.928794	0.826894	0.939178	0.778107	0.619738	0.644962	0.692255	0.612358	0.678154	1.13459	1.13855	1.09493	0.508168	0.375295	0.339799
ACSS2	54	0.928337	0.852612	0.86041	0.763146	0.718489	0.711635	0.755241	0.686908	0.73625	1.56524	1.59978	1.45947	1.03937	1.02376	1.05823	1.41479	1.35977	1.38722	1.03515	1.07897	1.07321	1.19061	1.0996	1.23046	0.744973	0.718287	0.748074	0.85845	0.833635	0.859712	1.53556	1.43408	1.67439	0.776695	0.749537	0.738677	0.618347	0.627126	0.652696	0.552747	0.491376	0.560194	1.20782	1.12264	1.14275	1.59129	1.57637	1.63914
ACSS3	54	0.380926	0.337996	0.409126	0.614419	0.652584	0.473868	0.491698	0.609805	0.513911	0.481299	0.615635	0.54672	0.707478	0.595619	0.58297	0.488531	0.520798	0.507846	0.550538	0.549166	0.445146	0.655663	0.696309	0.468944	0.689151	0.65851	0.604809	0.490427	0.46512	0.49726	0.6375	0.735087	0.622573	2.19426	2.20415	2.94256	1.73875	1.82024	2.01798	2.25492	2.32961	2.0019	0.568806	0.550643	0.555208	2.23287	2.16842	2.79217
ACTB	54	2.71055	2.6834	2.6144	0.732451	0.559076	0.837152	1.51574	1.2019	1.50359	0.812479	0.716478	0.749798	1.32248	1.19049	1.36059	0.841953	0.775903	0.891147	0.840733	0.55743	0.776591	0.960347	0.889527	0.972848	1.42118	1.60568	1.48762	1.40738	1.37736	1.2121	0.653492	0.776772	0.834597	0.522378	0.484714	0.561199	0.658723	0.573456	0.68058	0.881862	0.800903	0.558246	1.71636	1.50857	1.5553	0.498167	0.616083	0.6584
ACTBL2	54	0.99144	1.15889	1.33282	1.07754	1.10193	1.07954	1.00526	0.937357	1.1338	1.25598	1.09713	1.23344	1.22852	1.46729	0.786236	1.00875	1.01883	0.941649	1.03115	1.02567	0.967001	1.07057	0.992541	0.936376	1.16121	1.19237	0.987094	0.97703	0.892481	0.957809	1.25221	1.86034	0.76698	1.11287	0.858544	0.798238	1.12405	1.27384	0.930328	0.900802	0.92461	1.04481	1.03524	1.07046	1.47973	1.03499	1.14345	0.722886
ACTG1	54	1.27491	1.1871	1.11306	0.597954	0.822205	0.797058	0.991061	1.15982	1.22558	1.13422	1.24538	1.02654	1.55693	1.44126	1.47324	0.732179	0.650189	0.667928	0.605224	0.462469	0.641451	0.683629	0.618693	0.668822	1.75532	1.63403	1.79992	1.70584	1.91499	1.95755	0.359516	0.490886	0.492944	0.575784	0.411511	0.437527	0.665988	0.57798	0.809555	0.787247	0.896665	0.875892	1.70878	1.8379	1.99746	0.453501	0.310791	0.405876
ACTL6A	54	1.00033	1.06625	1.03531	0.909294	0.863618	0.86928	0.844102	0.827679	0.872424	0.930623	0.937181	0.923681	1.00914	0.964926	0.961766	0.749219	0.752629	0.819537	1.1883	1.14849	1.17667	1.1083	1.05782	1.08392	1.07951	1.03041	1.05079	1.00954	1.01468	1.0191	1.18342	1.19601	1.15484	1.05392	1.02856	0.996769	1.05932	1.05763	0.980213	1.03041	1.05086	1.03674	0.815956	0.806535	0.823084	0.919939	0.934299	0.889052
ACTL8	54	0.179137	0.19314	0.337159	0.94948	0.592386	0.73849	0.137341	0.137057	0.253117	0.158187	0.125036	0.251487	0.633752	0.486046	0.598026	0.187559	0.155567	0.258136	5.71918	5.18114	6.79932	0.68109	0.615746	0.595399	0.664641	0.509191	0.595272	0.17652	0.157151	0.236498	0.803674	0.576479	0.798797	0.857478	0.665773	0.791888	0.604593	0.479613	0.473973	0.128224	0.163037	0.223362	0.104945	0.125486	0.222924	0.60404	0.45028	0.459947
ACTN1	54	1.78002	1.69762	1.63358	1.09135	1.1579	1.14627	0.95736	0.943773	0.933969	1.9447	2.07461	1.97747	0.917374	0.945739	0.893054	0.656652	0.704666	0.686196	0.827554	0.845429	0.821956	1.20962	1.19081	1.19974	1.40424	1.36571	1.41716	1.26124	1.29997	1.24467	1.1033	1.11113	1.08935	0.638996	0.627218	0.63817	0.827451	0.845321	0.807889	0.818832	0.800173	0.794736	1.1007	1.0967	1.10634	0.587503	0.611709	0.588599
ACTN2	36	0.887187	1.24528	1.25091			0.969226	1.76249	0.882959	1.0626	2.03112	1.97891	1.86067			0.826514	0.643131	1.08573	0.877301			0.698055			1.04287			0.857381	1.2283	1.08689	1.07243			1.15654			0.72208			1.11582	0.975311	0.968514	1.1556	0.91122	1.08021	0.829389			0.914746
ACTN3	54	1.52012	1.2877	1.93563	0.903572	1.10588	1.10147	0.846775	0.816583	0.956229	1.73321	1.52953	1.9532	0.903872	0.980256	0.853515	0.754315	0.844889	0.760067	0.574403	0.885986	0.77314	1.06425	1.25193	1.07478	0.832443	1.09833	1.03024	1.14183	1.08415	1.25258	0.964866	1.02646	0.964566	0.471533	0.698938	0.819358	0.659348	0.861438	0.776176	0.801567	0.852446	0.746103	1.02058	0.825271	1.04517	0.544028	0.698984	0.776335
ACTN4	54	1.51887	1.52799	1.44912	0.96181	0.991441	1.01055	1.09153	1.10698	1.08865	1.7734	1.83955	1.75856	0.817567	0.833476	0.832264	1.05393	1.07644	1.05377	0.786141	0.788244	0.803906	1.03204	1.0052	1.0038	1.10615	1.10584	1.10498	1.13448	1.17682	1.11635	1.19993	1.19805	1.18521	0.718328	0.721684	0.722638	1.04109	1.03658	1.05018	0.987154	0.964853	0.975636	1.12569	1.12087	1.09367	0.862817	0.89551	0.864835
ACTR10	54	0.912123	0.943108	0.862041	1.08278	1.24743	1.21644	0.890729	0.909942	0.862084	0.969636	1.01859	1.00347	1.13756	1.1248	1.0859	1.00783	1.06892	1.04273	0.979204	0.93881	0.971015	0.904658	0.876518	0.852387	0.930596	0.955234	0.95342	0.950021	0.953867	0.901343	0.882214	0.908199	0.922179	1.01136	1.02428	1.04214	1.11393	1.11928	1.05933	0.960344	1.0249	0.937123	1.46631	1.51222	1.33521	0.869725	0.853823	0.894233
ACTR1A	54	0.913596	0.912449	0.857816	1.23382	1.39356	1.38554	1.1046	1.03317	0.992408	1.03002	1.09776	1.07036	1.15424	1.19484	1.07905	0.880428	0.845143	0.85742	0.824743	0.825172	0.853422	0.888367	0.881079	0.848865	0.900832	0.917147	0.894463	0.905054	0.870715	0.893503	1.03429	0.958565	0.958941	0.832437	0.858532	0.88779	1.05531	0.986636	1.04844	1.008	0.945421	1.00129	1.52826	1.6136	1.50357	0.812931	0.812531	0.775355
ACTR1B	54	1.40197	1.36157	1.11321	0.729716	0.792059	0.75265	0.783314	0.852932	0.930501	0.936345	0.882747	0.974026	0.937574	0.963067	0.890217	1.14884	1.10893	1.19846	1.32406	1.2793	1.47589	0.876413	0.873532	0.950174	1.01462	0.993891	1.01373	0.804188	0.804213	0.917352	0.889841	0.92639	0.9296	0.999266	0.903339	1.0261	1.18924	1.0815	1.1596	1.06038	1.01677	0.98133	0.909785	0.865594	0.923524	1.07364	0.923831	0.979327
ACTR2	54	1.27592	1.24806	1.22299	0.959128	0.984334	0.987638	0.947469	0.929952	0.920002	1.22653	1.26237	1.19401	1.04255	1.06948	1.06079	0.869758	0.866062	0.865229	0.927043	0.911724	0.936342	0.99329	0.980218	0.993293	1.12136	1.11151	1.12909	1.15655	1.15842	1.14512	1.12883	1.09483	1.09369	0.912392	0.914067	0.92971	1.00407	0.991703	1.02434	0.980085	0.979682	0.963339	1.34977	1.34261	1.29872	1.00485	1.01757	1.02604
ACTR3	54	1.19683	1.24867	1.21834	0.938727	0.942872	0.936078	0.904379	0.885853	0.881684	1.19	1.20578	1.17309	1.04194	1.03547	1.01137	0.858127	0.826979	0.810532	0.924805	0.882494	0.905689	0.985373	0.955246	0.944103	1.12291	1.11432	1.10442	1.20519	1.203	1.1777	1.20045	1.19042	1.16582	0.900584	0.888441	0.891037	0.992817	1.03396	0.993475	0.911427	0.947078	0.954719	1.22151	1.21517	1.1975	1.0607	1.06948	1.05336
ACTR3B	54	0.892916	0.812543	0.754171	1.00005	1.07892	1.05618	0.948283	0.846173	0.85852	0.981405	0.86834	0.809239	1.14706	1.4057	1.33197	0.969918	0.873109	0.818831	1.40763	1.2928	1.17804	0.835793	0.965722	0.882894	0.991994	1.23408	1.00804	0.857258	0.909316	0.859545	0.982187	1.19498	1.03777	1.05277	1.12619	0.936713	1.1325	1.03446	0.926216	1.09656	0.924674	1.00587	0.866792	1.01869	0.944129	1.19013	0.717294	0.739154
ACTR5	54	1.15446	1.15467	1.04138	0.869376	0.797248	0.719366	0.89234	0.899906	0.858612	1.03509	1.10168	1.04214	0.908963	0.804419	0.774926	1.35015	1.41613	1.27266	1.44418	1.43278	1.37313	0.959333	0.926129	0.891015	0.855926	0.86115	0.882441	1.13075	1.19256	1.20229	0.860867	0.864138	0.893486	0.955586	0.910876	0.908105	0.883391	0.81562	0.970878	0.855596	0.826839	0.87568	0.84844	0.879614	0.819851	1.40811	1.44956	1.29164
ACTR6	54	0.849249	0.8466	0.860897	0.938648	0.932931	0.911161	0.856616	0.882592	0.853927	0.981404	1.02201	0.985197	1.07779	1.1148	1.16149	0.982117	0.95627	1.08131	1.11872	1.16535	1.21411	1.15713	1.07609	1.07369	0.854409	0.898954	0.881048	0.866842	0.946982	0.95179	1.01553	1.06591	1.02233	1.08691	1.21707	1.16551	0.888055	1.02115	0.93366	0.93907	0.932763	0.93879	0.793095	0.81919	0.787059	1.03919	1.06426	1.0033
ACTR8	54	1.02436	0.999065	0.94581	1.0677	1.06771	1.06734	1.43645	1.35354	1.34096	0.99808	1.09966	0.990636	1.22252	1.12837	1.12302	1.09737	1.14734	1.0619	0.977905	0.958575	1.0952	1.10785	1.13862	1.09815	1.08884	1.05778	1.11855	0.89055	0.901997	0.899589	0.952479	0.939121	0.905442	1.04378	1.06118	1.01638	0.881202	0.864198	0.897722	0.965762	0.997684	0.938624	0.903029	0.826564	0.798168	1.15165	1.13286	1.1725
ACVR1	54	1.16448	0.928457	0.839946	1.68766	1.67374	1.95552	0.667764	0.709802	0.722492	1.09218	1.00893	0.848826	0.753317	0.865216	1.01016	0.745622	0.677619	0.708848	0.82573	0.830312	0.901115	0.655273	0.785145	0.753112	1.27058	1.23616	1.3592	1.44913	1.22288	1.17623	0.827453	0.933494	0.930081	0.747702	0.62461	0.851243	0.829268	0.779759	1.01481	0.828952	0.704016	0.641763	1.1938	0.901291	0.838845	0.64669	0.676299	0.776044
ACVR1B	36		0.862892	0.901432	1.1219		0.995652		1.35878	0.919557		1.06239	1.44325	1.00322		1.08825		1.08596	0.883778	0.874435		0.983093	0.865387		1.01913	0.939289		0.684858		1.14089	0.799895	0.951528		0.937875	1.19663		0.775194	1.09342		0.887699		0.939404	1.0523		0.946947	0.614435	1.37065		0.759909
ACVR2A	45	1.07799	1.23199	1.14828	2.55683	2.03372		0.901466	0.951179	0.925693	0.515735	0.527505	0.505763	0.907122	0.722843		1.59478	2.35685	1.85845	1.03258	1.03208		1.05921	0.880331		0.870423	0.995065		0.725959	0.536227	0.871369	0.927887	0.599053		0.773218	1.07215		1.20519	0.973149		0.864583	0.840642	0.654223	0.882366	1.01437	0.82811	0.409903	0.572497
ACY1	54	0.80996	0.990921	0.873702	0.762829	0.314787	0.471731	0.717112	0.731415	0.825128	0.836733	0.810311	0.908435	0.720331	0.45528	0.565471	1.88387	2.1208	1.83348	1.01817	0.942494	0.923169	1.04336	1.14268	1.11656	0.912905	0.758407	0.80907	1.0929	1.12783	1.10594	0.96707	0.938515	1.00194	1.04256	1.05951	1.04849	0.720194	0.621854	0.580353	0.761858	0.550226	0.833426	0.758656	0.799312	0.843295	1.50113	1.511	1.64574
ACY3	45	0.380283	0.428789		1.09195	0.525538	0.848531	0.364338	0.90964		0.317916	0.799095		0.759698	0.678513	0.75888	0.321198	0.271688		5.55838	5.73126	5.64858	0.565601	0.536431	0.659965	0.619773	0.499135	0.678473	0.39493	0.51423		0.659623	0.49022	0.749548	0.571022	0.512013	0.569666	0.525329	0.423613	0.586824	0.26842	0.584018		0.361011	0.533566		0.651361	0.559256	0.672293
ACYP1	54	0.964965	0.85033	0.881345	1.78337	2.01751	2.01063	1.04425	0.895273	0.978118	0.586423	0.530289	0.651053	1.23102	1.28716	1.24949	0.685247	0.528041	0.630844	0.685886	0.785641	0.810906	1.0152	0.965716	1.02559	0.931968	0.943285	0.9478	0.95127	0.889868	0.890114	1.57087	1.57265	1.88378	1.06965	1.05032	1.15613	1.34974	1.26053	1.38658	0.930083	0.880402	0.846251	1.64053	1.57006	1.37159	0.738258	0.683575	0.736819
ACYP2	54	2.12257	1.98753	2.04865	0.647927	0.603464	0.728072	0.690764	0.448828	0.619498	0.788453	0.576892	0.669534	0.590405	0.692114	0.657029	2.3693	2.41899	2.39078	1.04995	1.09232	1.01854	1.36419	1.15043	1.2978	0.747223	0.714892	0.699295	0.821876	0.722706	0.794146	1.15716	1.10216	1.14163	0.549952	0.605064	0.573996	0.796888	0.787706	0.751719	0.970042	0.979979	1.00386	1.76639	2.18042	2.23829	0.804137	0.817399	0.942302
ADA	54	0.878311	0.821493	0.804136	0.465601	0.546616	0.441735	0.652978	0.576054	0.621532	1.07806	1.09581	1.11296	1.30593	1.22793	1.22533	0.53162	0.532144	0.505757	0.977983	0.903992	0.897835	0.871469	0.883072	0.876994	0.649204	0.614659	0.630504	3.10496	3.36873	2.99968	1.30409	1.24068	1.28897	0.523306	0.504994	0.468312	0.506912	0.484031	0.391936	0.530691	0.496636	0.488051	1.81168	1.90623	1.73898	0.429233	0.41721	0.377608
ADAL	54	1.30934	1.36767	1.42278	0.684344	0.72641	0.713302	0.815897	0.797284	0.695069	1.12331	1.11036	1.09245	0.990043	0.995452	0.903592	1.36112	1.36653	1.21738	0.981858	1.04614	0.958756	1.02118	0.992153	0.98627	0.478402	0.362467	0.453887	0.794108	0.759032	0.749067	0.908216	0.94369	0.976962	0.841015	0.81132	0.79768	0.776186	0.760292	0.691998	0.810875	0.726164	0.788018	1.26553	1.40022	1.24412	1.25463	1.41768	1.42384
ADAM10	54	1.38568	1.40425	1.35158	1.03902	0.969423	0.938529	1.55916	1.55104	1.55669	1.41591	1.43611	1.42822	0.776876	0.736444	0.771872	0.948243	0.890308	0.920382	0.926696	0.89987	0.912057	1.1789	1.12373	1.16833	1.31233	1.2356	1.28745	1.00461	0.999201	0.943467	1.53613	1.44363	1.54448	0.662238	0.632055	0.674931	0.86578	0.849167	0.88708	0.932239	0.9155	0.915284	0.893202	0.855033	0.917976	0.951084	0.926399	0.938977
ADAM11	9				0.757577									1.31338						1.00843			0.612363			0.564243						1.17734			1.13526			1.42283									1.277
ADAM12	27			0.696142	3.25774	2.68471				0.633501			0.954209	0.705265	0.72502				0.64748	0.82922	1.06676		0.821956	0.902074		0.944533	0.764168				1.02019	1.10449	0.823152		0.607384	0.803755		0.7473	0.722987				0.686986			1.00494	0.723152	0.754758
ADAM15	54	1.0087	1.05519	0.943572	0.863238	0.746729	0.771203	0.731201	0.691341	0.644843	0.996695	0.95251	0.950447	0.760295	0.762794	0.69342	0.616969	0.585522	0.58631	1.00521	0.899088	0.952428	0.802305	0.728742	0.727593	1.7186	1.94755	1.81262	0.819028	0.861894	0.896745	1.72704	1.85858	1.91222	1.09144	1.06746	1.11574	1.01033	1.0179	1.02196	1.04842	0.975366	1.01668	0.751778	0.761254	0.806406	0.814028	0.785186	0.841007
ADAM17	54	1.29131	1.26685	1.24574	0.993584	0.908102	0.925565	0.972001	0.937048	0.959798	1.05384	1.09016	1.04049	1.26182	1.24062	1.32331	0.803264	0.748988	0.802303	1.49199	1.47432	1.76635	0.933183	0.910974	0.915948	1.05263	1.03929	1.16064	0.92029	0.856996	0.893407	0.919435	0.861249	0.887515	0.945863	0.869227	0.989623	0.930844	0.937284	0.94267	0.945663	0.876577	0.870646	1.11852	1.07427	1.11223	0.921772	0.863915	0.883329
ADAM19	9						1.60594									0.827365						1.13483			1.18652			1.24661						0.809924			0.956073			0.886396									1.03659
ADAM22	36	1.08986	0.990857	1.07682	2.30583			1.5706	1.96549	2.59803	1.37227	1.09312	1.23307	1.17178			0.980488	0.717185	0.812487	1.24447			1.38734			0.914113			0.938402	1.1589	1.50039	1.0937			0.794986			0.933728			1.11608	1.02034	1.63271	0.793586	0.934562	0.953015	0.74857
ADAM8	27	1.1046	1.22267	0.819552				0.590482	0.607018	0.88545	0.783098	0.687759	1.5611				0.569626	1.05227	0.858941										0.97073	0.647641	0.844794										0.688919	0.547927	1.13853	0.830924	0.620238	0.863324
ADAM9	54	1.49098	1.45164	1.38407	3.71347	3.49104	3.24813	0.949609	0.927181	0.96392	1.05251	1.07908	1.0768	0.590741	0.639687	0.610537	0.757931	0.835718	0.774274	1.24784	1.05823	1.23556	0.929175	0.884042	0.917764	1.09615	1.04974	1.12906	1.27383	1.25988	1.29471	0.605633	0.591175	0.619159	0.584237	0.565914	0.600169	0.53987	0.540911	0.600842	0.51663	0.57361	0.555411	1.05861	1.02777	1.00508	0.562886	0.5716	0.559984
ADAMTS1	54	0.474267	0.456959	1.00941	2.91819	2.86556	3.13363	2.0005	2.16937	2.23192	0.67522	0.636289	0.616746	1.40295	1.67498	1.53915	1.02562	0.517231	0.42821	2.14471	2.40598	2.50245	0.865944	0.562204	0.445689	0.58071	0.519727	0.594399	1.08598	0.942153	0.909316	0.529205	0.415583	0.700334	0.545948	0.406531	0.382394	0.554087	0.502743	0.398339	0.596146	0.359114	0.332804	1.27554	1.16598	1.26171	0.490209	0.392056	0.465316
ADAMTS12	27				2.15449	2.39898	2.43397							1.60521	1.69497	1.26691				1.06595	1.10188	0.914416	2.05775	2.456	2.51937	0.592465	0.630184	0.821528				0.629334	0.679306	0.785756	0.602297	0.600732	0.718043	0.723063	0.683083	0.727304							0.548409	0.658664	0.725984
ADAMTS15	27	1.0804	1.01809	1.00964				2.50849	4.10115	2.56935	1.22678	1.4059	1.47907				1.08901	1.00425	1.11408										0.819651	0.784409	1.19543										0.780193	0.603405	0.776964	1.35817	2.00366	1.56267
ADAMTS19	18			0.609751		0.745467				0.853794			0.804025		0.601362				0.841338		0.675082			0.765602			0.584054				0.767952		0.839405			1.39124			3.76503				2.31412			0.7981		0.781013
ADAMTS2	36	1.55725	1.33851	1.26421	0.959959			1.07834	0.973758	0.918459	1.6874	1.67133	1.63583	0.814792			1.14318	1.06873	0.903345	0.738815			1.01229			1.10818			1.16813	1.03695	1.03828	0.99804			0.744602			0.967105			0.936985	0.85185	0.904304	1.27113	1.17531	1.09602	0.743732
ADAMTS3	9					1.01487									0.441333						0.504394			0.432056			0.497833						0.367615			0.809875			0.345714									0.831641
ADAMTS4	27				4.5091	3.04422	2.77984							0.778194	0.709404	0.43457				2.91695	2.44687	2.05936	0.755683	0.680788	0.594188	0.612373	0.547945	0.536744				0.766311	0.738769	0.847963	0.517301	0.539495	0.434228	0.510655	0.701802	0.573779							0.570078	0.399223	0.417818
ADAMTS5	9			1.10781		NA				0.618742			0.82735		NA				0.742739		NA			NA			NA				1.45835		NA			NA			NA				0.465362			2.46605		NA
ADAMTS7	9				0.651528									1.85316						0.890628			1.29573			0.627325						0.870336			0.827785			0.915718									0.889125
ADAMTSL4	18		2.76406	2.46306					0.702548	1.23435		1.4202	1.1265					0.568667	0.359815											0.860067	0.571954											1.61721	0.890914		1.07718	1.2257
ADAP1	54	1.44413	1.61751	1.52893	0.603401	0.885993	0.583178	0.768755	0.710875	0.811772	0.773752	0.648495	0.771529	1.10544	1.22655	1.30218	0.769473	0.938292	0.810193	0.484427	0.76416	0.534663	1.75841	1.39389	1.83029	1.09261	1.15744	1.12387	0.927964	1.02554	0.829128	1.05824	1.02092	1.23069	0.621213	0.752779	0.673393	1.93809	1.63536	2.08413	1.77112	1.85162	1.9305	0.831558	0.654868	0.841003	0.535402	0.848951	0.545345
ADAR	54	0.912364	0.902618	0.883948	1.1035	1.06787	1.04431	0.831504	0.806214	0.8203	1.06644	1.10157	1.04938	1.49773	1.50888	1.46113	0.895183	0.843745	0.885563	1.07429	1.05957	1.10078	0.8262	0.821958	0.797708	1.18259	1.19808	1.18824	1.01339	1.01935	1.00618	1.09567	1.09285	1.07477	1.14921	1.16361	1.12757	0.918514	0.952184	0.926848	0.95526	0.95695	0.945537	0.796718	0.768089	0.796258	1.37645	1.39386	1.34843
ADARB1	54	0.865504	0.838584	0.724109	0.744046	0.701491	0.589428	0.741326	0.767064	0.710605	1.65813	1.61325	1.57231	1.16861	1.24761	1.31789	1.02901	0.980444	1.03076	1.64	1.6514	1.91362	0.744452	0.906615	0.709761	0.878875	0.824884	0.854068	0.667149	0.77334	0.758825	0.646143	0.582076	0.559887	0.846007	0.789492	0.777389	1.15829	1.25994	1.38466	1.49811	1.54423	1.67172	1.15628	1.12156	1.13412	0.612855	0.534425	0.573677
ADAT1	54	2.10364	2.18068	1.81118	0.820167	0.743846	0.748322	0.710058	0.741639	0.759219	0.776916	0.80435	0.836553	0.77501	0.719498	0.723707	0.711631	0.894214	0.775659	0.734643	0.745554	0.652991	1.29912	1.34065	1.45244	1.37123	1.24768	1.25569	1.28519	1.15384	1.11865	1.23869	1.28514	1.36244	1.18999	1.09147	1.1042	1.32131	1.25441	1.29228	1.22738	1.21751	1.09886	0.838051	0.816484	0.864575	0.656176	0.674731	0.588857
ADAT2	54	0.855383	0.76732	0.679942	1.16513	1.3373	1.11263	1.77509	1.9353	1.56353	1.19538	1.22647	1.01123	0.832692	0.907948	0.894016	0.817511	0.659721	0.719349	1.05457	1.16127	1.22904	1.13651	0.90613	1.33869	1.06379	1.08322	1.27723	1.23584	1.39894	1.06243	0.963669	0.879599	0.979533	1.04049	1.34111	1.06273	0.887982	0.850958	0.71727	0.964152	1.03343	0.819366	1.2524	1.45641	1.0069	1.40854	1.44556	1.5015
ADAT3	54	0.74215	0.710948	0.857351	1.24451	1.62956	1.33677	1.25519	0.988311	1.17864	0.742379	0.745755	0.838179	1.06703	1.11603	1.07406	0.994602	0.963631	0.906093	0.652947	0.79735	1.067	0.805563	0.835305	0.751842	1.01232	1.02485	1.20364	0.924463	0.846098	0.938252	0.807924	0.926956	0.977207	0.987827	1.04655	1.15218	0.786946	0.825372	0.922043	0.75842	0.776559	0.833031	1.05031	1.02968	1.1067	1.18253	1.19806	1.11661
ADCK1	54	0.712127	0.539603	0.702184	0.77338	0.964697	0.786784	0.719076	0.786295	0.740353	0.655382	0.551722	0.679156	0.945575	0.63787	0.726566	1.59666	1.62653	1.49809	0.979818	0.859601	0.865224	1.03091	0.970919	1.06772	0.882152	0.746648	0.7701	0.574502	0.570954	0.615235	0.984701	0.924163	0.939617	1.35642	1.37066	1.44966	1.37435	1.37443	1.32176	1.12795	1.37786	1.23628	0.89514	1.01068	0.818127	0.958689	0.975961	0.9706
ADCK2	45	0.904766	0.940483	0.910418	0.671452	0.626315		1.04528	1.20864	1.11893	0.842859	0.89821	0.849455	0.759715	0.763346		1.5189	1.00589	1.33362	1.29266	1.1033		0.898888	0.730825		0.866281	0.80817		0.766742	0.718539	0.748405	0.889935	1.05935		0.940948	0.70326		1.19683	1.03919		1.18989	0.931059	1.13642	0.834162	0.827059	0.894132	1.05769	0.919627
ADCK3	54	0.717713	0.679923	0.711877	0.987592	0.881574	0.925956	0.691286	0.698576	0.68657	0.720022	0.737615	0.769782	1.10985	1.09117	1.08299	1.1337	1.1414	1.2072	1.81624	1.52163	1.51516	0.673911	0.761668	0.726192	0.927844	0.891863	0.898911	0.92595	0.899088	0.949684	0.85461	0.805816	0.831648	0.865822	0.824801	0.816256	0.806894	0.797155	0.812592	0.758934	0.823284	0.804497	0.696782	0.700762	0.714836	1.29491	1.19266	1.29944
ADCK4	54	0.958796	0.958105	0.929454	0.787924	0.768203	0.733229	1.42822	1.46962	1.35489	0.843673	0.841354	0.839688	0.761708	0.83945	0.844147	1.26515	1.3122	1.23947	0.901112	0.848878	0.875883	0.746549	0.778959	0.771043	0.868061	0.913232	0.912398	0.82401	0.802909	0.792254	1.44884	1.55624	1.58601	1.10633	1.08469	1.05784	1.28317	1.25608	1.28135	1.21128	1.28078	1.16845	0.705803	0.684085	0.72364	1.32268	1.32104	1.34433
ADCK5	54	0.868807	0.69864	0.719069	0.6228	0.615851	0.824187	0.704169	0.578938	0.680371	1.48538	1.41382	1.33985	0.788101	0.747036	0.843804	1.55466	1.81402	1.52044	1.16491	1.30718	1.13929	1.71578	1.77479	1.46247	0.535344	0.664099	0.753076	0.807675	0.518185	0.667355	0.86168	0.858934	0.954119	0.969546	0.921074	1.0356	1.14313	1.12659	1.17141	0.995566	1.33579	1.21571	0.713438	0.523454	0.872234	0.741703	0.67933	0.87247
ADCY1	27			1.23031	0.863209	1.0554				1.12379			1.43824	0.877098	1.02706				1.20531	0.70255	1.42536		0.743805	1.13047		0.84832	1.05006				1.08556	1.11949	1.2588		0.764441	1.19239		2.1151	2.03984				0.991759			0.710517	0.746321	1.02269
ADCY3	54	1.11877	1.19986	1.2288	1.10625	0.94227	0.902489	0.931575	1.00659	1.16333	0.86085	0.718104	0.845292	0.688199	0.639081	0.679896	0.702292	0.587717	0.839838	1.4029	1.39205	1.44973	1.21819	1.20759	1.18002	0.813776	0.823728	0.760516	0.99426	0.900037	0.884142	2.09078	2.18403	2.11041	1.04937	0.950619	1.05534	0.906256	0.749303	0.820725	0.8006	0.90227	0.838663	1.10672	1.26541	1.12871	0.658677	0.469928	0.541042
ADCY5	18	0.98501			0.387454			1.14514			0.758781			0.486767			0.969774			0.481156			0.384528			0.256411			0.69426			0.554328			0.38806			3.50281			1.00767			0.917357			0.533328
ADCY6	54	0.854611	1.0243	1.01363	0.852861	0.909826	0.980094	1.14565	1.34016	1.22709	0.703135	0.77463	0.78048	0.837562	0.875631	0.913312	1.58883	1.54144	1.64618	0.864755	0.972273	0.891525	0.835636	0.83092	0.887688	0.739543	0.783401	0.827568	0.730792	0.79009	0.80017	0.898648	1.02378	1.01164	1.05843	1.13885	1.01654	0.690801	0.828652	0.868223	0.756053	0.878586	0.741045	0.709505	0.957183	0.935392	1.48634	1.43972	1.6777
ADCY7	45	1.4779		1.07136	0.579467	0.758583	0.924036	1.36493		0.990753	1.344		1.42795	1.46961	1.1547	1.38055	1.17621		0.634114	1.31878	1.2949	1.10207	1.38655	1.51897	1.29822	1.01068	0.819478	1.21112	1.49418		1.26616	1.62221	1.42293	1.43044	0.589544	0.776572	0.799167	0.537898	0.646152	1.20787	0.584313		0.774982	0.806126		1.10379	0.559117	0.679036	1.09672
ADCY9	54	0.667297	0.650591	0.691053	1.08161	1.01724	1.04211	0.942198	0.951612	0.89129	0.925939	0.847379	0.847039	0.492626	0.378118	0.514957	0.855701	0.78391	0.801054	0.921908	0.800704	0.841712	0.906916	0.799487	0.803892	0.728388	0.642413	0.660654	0.996484	1.02433	1.06165	1.26917	1.29625	1.1711	1.32114	1.37902	1.35781	1.49278	1.64203	1.5698	1.60363	1.63057	1.674	2.32414	2.4745	2.38044	0.933729	0.84897	0.887874
ADD1	54	0.817231	0.796694	0.757138	0.541489	0.673093	0.558625	1.13933	1.16549	1.17597	0.982697	1.07709	0.999747	1.77213	1.62158	1.75076	0.768065	0.674386	0.678665	1.2166	1.20903	1.17295	0.791979	0.805367	0.765766	0.724748	0.814133	0.728567	1.12681	1.13295	1.1556	1.30975	1.28329	1.36096	0.984191	1.00754	1.02409	0.860727	0.872302	0.901426	0.764781	0.675451	0.714241	1.32166	1.50517	1.33089	0.575927	0.620146	0.551805
ADD2	54	0.767018	0.781711	0.769262	0.546994	0.641078	0.355262	0.405451	0.355096	0.414983	1.44798	1.49232	1.29815	4.43902	4.82436	4.41035	0.42454	0.424886	0.41126	0.472668	0.552778	0.409737	0.725166	0.824551	0.735696	0.438953	0.616201	0.386833	2.39778	2.38094	2.43352	0.320754	0.495686	0.368114	0.366771	0.393825	0.32576	0.293817	0.411861	0.35724	0.358588	0.283096	0.376193	0.400635	0.360615	0.352988	0.32724	0.436613	0.311112
ADD3	54	0.686211	0.653281	0.697057	0.640131	0.490668	0.510359	1.37887	1.33567	1.38501	1.01289	0.972067	1.00365	0.845575	0.806635	0.907418	0.543585	0.599342	0.668832	1.6008	1.56916	1.69927	0.92902	0.860923	0.897258	0.767543	0.709017	0.791953	0.963508	0.870076	0.938365	1.87854	1.6886	1.89926	1.2109	1.14066	1.20407	1.05273	0.94964	1.00799	0.701812	0.648736	0.640556	1.74065	1.74286	1.71899	0.779321	0.667969	0.745989
ADH1C	27				0.81765	0.424493	0.807274							0.753152	0.382251	0.51252				0.816165	0.641686	0.712495	1.0699	0.963711	0.808146	0.705865	0.509318	0.784174				5.18943	10.5079	3.33858	0.7345	0.366375	0.513811	0.881582	0.499322	1.68034							0.910373	0.574614	0.758908
ADH5	54	0.591963	0.58678	0.621956	1.16896	1.19815	1.24343	1.19392	1.19776	1.16039	0.898501	0.854566	0.922382	1.24349	1.24515	1.25594	0.984886	0.937692	0.966945	1.16621	1.0991	1.15624	0.828611	0.823669	0.826697	0.98935	0.976349	0.971498	1.11231	1.11628	1.08498	0.747636	0.769218	0.778272	1.17945	1.14902	1.13657	1.02394	1.01875	1.02242	0.930452	0.963496	0.958937	1.22513	1.23281	1.22864	0.961907	0.948266	0.974119
ADI1	54	1.12067	1.21574	1.10032	0.782792	0.791085	0.789163	0.977807	1.03173	1.06013	1.00573	0.94946	0.966542	0.927811	0.878438	0.914576	1.07081	1.19226	1.06405	0.906598	0.850242	0.919216	1.06827	1.0636	1.07932	0.854888	0.81272	0.836269	0.83977	0.890055	0.872506	0.89816	0.884295	0.854561	1.38432	1.45676	1.41648	1.36336	1.32255	1.31226	1.27257	1.29684	1.32421	0.930633	0.906279	0.938408	0.975143	0.949477	0.922964
ADIPOR1	54	0.801453	0.768306	1.02578	0.789366	0.761475	1.00618	0.66292	0.664104	0.751051	0.727281	0.824395	0.767206	0.73964	0.754607	0.716293	2.67354	3.51907	2.81501	1.13224	0.870996	1.12747	0.814601	0.791806	0.81808	0.92301	0.894782	1.0197	0.635703	0.823529	0.740751	0.672734	0.644671	0.537169	1.06205	1.10164	1.1468	0.907216	0.870212	0.842356	1.05652	1.03489	1.0482	0.841352	0.989996	0.829337	1.81912	1.48613	2.05558
ADIPOR2	45	0.932997		1.04854	0.685226	0.533626	0.782384	1.02974		0.793224	1.20957		1.02337	1.0869	0.83651	0.891404	2.16362		1.99399	0.689094	0.545157	0.77065	0.728887	0.751996	0.964805	1.09282	1.17447	0.959139	0.871141		0.700092	0.661706	0.665965	0.634769	1.16473	1.19899	1.32031	1.08719	1.13773	1.11386	1.42558		1.84012	0.922794		0.794665	2.9131	3.10321	2.38289
ADIRF	54	0.444925	0.341947	0.473606	0.315392	0.413424	0.331633	0.327449	0.262354	0.261102	0.717586	0.665391	0.694088	0.189106	0.216319	0.251711	5.66134	6.07994	5.97174	0.167669	0.25956	0.210654	0.206739	0.241541	0.257378	0.25628	0.346531	0.293107	0.604208	0.568301	0.69042	0.414738	0.478643	0.450336	1.38989	1.30257	1.34515	0.286761	0.302663	0.262134	0.434503	0.317859	0.345129	0.463347	0.365271	0.393632	1.88962	1.94591	1.87825
ADK	54	1.1534	1.18968	1.16856	0.788527	0.865333	0.780783	0.632562	0.651031	0.672327	0.994956	0.983379	0.992866	0.980109	1.01004	0.967252	0.717579	0.738003	0.716653	0.77364	0.844142	0.75814	0.885969	0.935202	0.893055	0.83453	0.88903	0.828012	1.09414	1.07008	1.07616	1.07766	1.10168	1.06369	0.956021	0.938851	0.900695	1.17993	1.16904	1.22341	1.17669	1.17342	1.11496	0.805337	0.830097	0.842913	1.79849	1.69869	1.77659
ADM	9		1.14703						0.989891			0.962918						1.1752												1.26758												0.80642			1.13944
ADNP	54	0.865224	0.90213	0.895618	0.84961	0.768057	0.794669	0.904037	0.917531	0.904666	0.890288	0.834936	0.82684	1.08508	1.01112	1.10156	1.53936	1.42292	1.44839	1.38108	1.32086	1.45509	0.811032	0.7624	0.771805	0.875683	0.870172	0.92376	0.780442	0.744164	0.779641	0.918583	0.900649	0.956164	1.08171	1.06171	1.08214	1.43017	1.37699	1.43485	1.54756	1.595	1.50679	1.31025	1.34249	1.2982	1.30973	1.2391	1.30554
ADNP2	54	0.76742	0.859879	0.863297	1.0324	0.981796	1.021	1.35946	1.27416	1.28809	1.19767	1.31285	1.38093	1.10335	1.22962	1.28515	0.871438	0.783915	0.845364	1.10932	1.02473	1.27863	0.830311	0.972647	0.855175	1.02014	0.925952	0.940501	1.17676	1.20991	1.1864	1.01781	1.0415	1.04626	1.11902	1.18259	1.25435	1.09045	1.1119	1.18673	1.14132	1.20859	1.0747	0.998163	0.852022	0.992543	0.963704	0.91905	0.916991
ADO	54	1.19419	1.25293	1.17236	0.763011	1.13106	0.94254	1.00683	0.880015	0.943599	0.998649	0.988507	0.944798	1.47808	1.90614	1.80945	1.0183	1.1076	1.01055	0.898008	0.95058	1.04566	0.870656	0.753531	0.788528	0.858554	0.872795	0.978396	1.08287	1.01307	1.12343	0.8615	0.812879	0.829951	1.18377	1.20161	1.20242	0.971743	0.89393	0.893858	0.89524	0.866092	0.961544	0.931188	0.916166	0.964067	0.934438	0.980405	1.02466
ADORA1	9						0.704284									1.32217						0.910857			1.21341			1.50188						1.1332			1.71633			0.667106									1.42403
ADPGK	54	1.19248	1.26234	1.17641	1.30606	1.0388	1.17819	1.09721	1.20837	1.11676	0.988145	0.999096	0.962717	1.0356	0.950163	1.06534	0.964993	0.717994	0.801445	1.83579	1.91601	2.13488	0.942474	0.871886	0.866923	0.865932	0.868625	0.905328	1.25924	1.17323	1.1587	0.802701	0.814304	0.801868	0.934358	0.842611	0.854612	1.21698	1.11474	1.21615	1.28599	1.25323	1.24599	0.831467	0.799195	0.751861	0.696685	0.697427	0.648275
ADPRH	45		0.968859	0.959171	0.812339	0.709282	0.90663		0.610899	0.838326		1.14962	1.21394	1.0507	1.15933	1.1349		0.648153	0.917507	0.957113	0.991902	0.894229	1.93538	2.43497	2.79163	0.997631	1.02016	0.770037		1.8197	1.79998	0.949259	0.761291	1.02015	0.858091	0.666602	0.815731	0.78819	0.644036	0.719265		0.61164	0.767998		0.618564	0.711854	0.892067	0.703266	0.57585
ADPRHL2	54	0.826246	0.793616	0.895831	1.27602	1.28834	1.21283	0.944423	0.954644	0.990767	0.996763	0.975335	1.06692	1.48417	1.48199	1.41849	1.1118	1.11383	1.16839	1.04646	1.04923	1.05457	0.902567	0.863893	0.858842	0.898698	0.938528	0.868169	0.862814	0.806219	0.886533	1.11655	1.17116	1.05964	0.753411	0.83031	0.812658	0.848864	0.89233	0.837657	0.836571	0.865808	0.848911	1.03249	1.09821	1.05558	0.821929	0.840351	0.878527
ADPRM	45	0.818201	0.735492	0.902367	1.22894	0.840764		0.992999	0.723954	0.808093	1.09388	0.756135	0.808427	1.40147	0.891207		0.850314	0.970906	0.789368	0.569315	0.60927		0.902007	1.86471		0.85007	0.524798		0.944147	0.837102	0.957785	0.671138	0.571258		0.819457	0.499308		0.781062	0.631516		0.897474	0.794363	0.841869	1.61549	1.10487	1.52543	0.900265	0.568526
ADRB2	18	0.87161		1.49435				0.891505		1.00083	1.09835		1.24642				1.34598		1.37597										1.271		1.08731										1.08426		0.989422	1.61832		1.19527
ADRBK1	54	0.736863	0.682861	0.78884	0.822329	0.809869	0.790393	0.78449	0.867419	0.81462	0.851548	0.829895	0.812691	1.14771	1.12943	1.1045	1.64526	1.58996	1.58122	1.20984	1.20591	1.23168	0.813595	0.857178	0.879121	0.998092	0.965068	0.986841	0.966263	1.00274	0.974583	1.08764	1.07631	1.09881	1.14291	1.16413	1.15249	1.19598	1.1918	1.24868	1.30163	1.36102	1.22037	0.939285	0.953356	0.949239	1.02143	1.03978	1.03054
ADRBK2	45	0.598565	0.818821	0.730937		0.636346	1.06197	0.839054	0.916142	1.09491	0.79654	1.04924	0.977278		0.764159	0.973392	0.708016	0.826388	0.957867		1.34126	1.89117		0.830756	0.922323		0.760695	0.68938	0.934586	1.22151	1.35156		0.701852	0.656863		1.29933	1.39608		1.08612	0.930175	0.986951	0.760445	0.768662	1.29776	1.29805	1.63167		0.83617	0.763268
ADRM1	54	1.10897	1.1584	1.20963	0.969101	1.0232	0.973475	0.980152	1.03589	1.00287	0.814003	0.785237	0.805458	0.886791	0.863817	0.826603	1.48346	1.57226	1.58301	0.924521	0.891151	0.863604	1.03215	1.04442	1.00748	1.10001	1.0771	1.05211	1.10185	1.08501	1.09187	0.891599	0.915463	0.879983	0.994305	0.953742	0.954224	1.32387	1.23679	1.32123	1.36434	1.31246	1.33678	1.14759	1.09641	1.08511	0.944856	0.928483	0.923053
ADSL	54	0.953222	0.918949	0.84509	1.01622	1.0565	1.07079	1.83525	1.80227	1.79941	1.30518	1.3569	1.30351	0.800064	0.843157	0.802162	0.820848	0.845349	0.859331	1.09867	1.09294	1.08395	1.01365	0.990391	1.05104	0.803707	0.738483	0.750018	1.00282	1.00826	1.01008	0.909224	0.889683	0.888705	0.96625	0.949572	0.872997	0.704703	0.667037	0.695659	0.703606	0.68222	0.727956	1.48292	1.50438	1.47622	0.744658	0.762852	0.729984
ADSS	54	1.23514	1.27769	1.27227	0.691226	0.666264	0.687607	1.1994	1.18489	1.15754	1.06253	1.03861	1.06182	0.859983	0.815696	0.877555	0.976945	0.94482	0.958757	1.10651	1.08655	1.13229	1.00792	0.995921	1.02003	1.14202	1.16711	1.14586	1.56009	1.50919	1.57697	1.04876	1.00558	1.02953	0.743758	0.730146	0.780507	0.748062	0.721465	0.713885	0.774585	0.749558	0.749214	1.157	1.21847	1.21266	0.948848	0.961248	0.926802
ADSSL1	54	0.381595	0.381592	0.376764	0.496507	0.654582	0.423081	0.472142	0.39673	0.438162	1.44737	1.29909	1.4196	2.78402	3.45439	3.41364	0.489946	0.478155	0.412232	0.490501	0.531412	0.373699	0.793071	0.948284	0.840693	0.507514	0.605371	0.336851	0.847816	0.734931	0.824358	0.659862	0.751005	0.601797	0.889251	0.969435	0.923067	1.10843	1.26994	1.32909	1.22738	1.06905	1.22763	0.917713	0.864836	0.925654	0.586885	0.719941	0.412936
AEBP2	54	0.726175	0.871214	0.804372	0.79838	0.71431	0.869525	1.90323	1.82542	1.93633	0.856825	0.884378	0.772759	1.07978	1.11921	1.21932	0.784808	0.646787	0.861399	1.0786	0.984243	1.03923	1.37434	0.950761	1.46944	0.860048	0.657391	0.743658	1.28327	1.29684	1.12288	0.736826	0.804286	0.655171	0.941835	1.11858	0.993791	0.769035	1.11674	0.805283	0.965063	0.915532	1.14217	0.503354	0.517796	0.552681	0.651952	0.849344	0.717359
AEN	36	1.04391		0.891503	1.20116	1.11984		1.3597		1.42209	0.832067		0.706409	0.962875	0.830191		0.811066		0.789545	1.17576	1.25746		0.813186	0.83838		1.23563	0.886378		1.12622		1.02957	0.720904	0.694998		1.03594	1.07529		0.831672	0.856898		1.33009		1.29214	1.07738		0.931911	1.0984	0.886224
AES	54	0.768605	0.753946	0.808627	0.78073	0.674974	0.852162	0.638947	0.571234	0.530257	0.670247	0.697758	0.631741	1.41502	1.32502	1.19188	1.66116	1.27757	1.4941	1.50407	1.39015	1.47361	0.605655	0.719092	0.765801	0.810397	0.645063	0.76443	0.696698	0.556712	0.676472	0.942261	1.0562	0.923323	1.2483	1.21021	1.22767	1.10071	0.949205	1.11524	0.962864	0.964375	1.02026	0.853245	0.945734	0.965071	1.58413	1.66982	1.37436
AFAP1	54	1.13009	1.20494	1.14333	1.92603	1.85559	2.11463	0.68132	0.638177	0.676945	1.09664	1.17531	1.04182	0.972139	1.0292	0.93	0.830867	0.716175	0.820513	1.11546	1.01924	1.06592	1.45497	1.48835	1.38926	1.44239	1.44899	1.41574	1.10154	1.12814	1.05638	0.629535	0.580536	0.645761	0.788583	0.742492	0.742889	0.754981	0.775267	0.767708	0.742896	0.657362	0.703297	1.68017	1.7167	1.54999	0.711897	0.672049	0.653218
AFAP1L1	54	0.781827	0.772443	0.876988	1.042	0.943426	0.942943	0.742339	0.467402	0.479196	2.15656	2.25811	2.34508	0.788838	0.800371	0.946619	0.574256	0.613043	0.351161	0.56073	1.08302	0.673338	3.17808	2.07272	2.98632	0.548559	0.664868	0.643648	0.786319	0.826967	0.663846	0.573903	0.74895	0.724304	0.368338	0.915219	0.451109	0.409297	0.641329	0.450828	0.678483	0.678813	0.2593	1.19028	1.08563	1.22371	0.537689	0.885557	0.645104
AFAP1L2	54	0.501608	0.392215	0.584226	0.671181	0.817799	0.660371	2.56935	2.79977	2.40949	0.959929	0.926592	1.00443	2.98726	3.7016	3.09996	0.484457	0.492837	0.536433	0.464437	0.427501	0.409108	1.00495	0.967834	0.996277	0.479055	0.558325	0.498769	0.638555	0.597484	0.630609	1.44848	1.6892	1.47641	0.477604	0.469129	0.465813	0.470687	0.368108	0.435409	0.522823	0.464545	0.468571	1.42625	1.59143	1.40156	0.486806	0.402462	0.411632
AFF1	54	1.1113	1.18874	1.11018	1.00995	0.916141	0.923142	1.2524	1.34146	1.30575	0.845981	0.761238	0.763466	0.778749	0.848777	0.863829	1.05603	0.953382	1.09507	1.33014	1.26126	1.32933	1.23527	1.1174	1.12446	1.29337	1.18437	1.169	0.943001	0.908409	0.952015	1.32615	1.27816	1.23474	1.03481	0.998722	0.925539	0.752732	0.848066	0.783707	0.824166	0.77403	0.693656	0.811248	0.723333	0.810461	1.24598	1.22637	1.26694
AFF3	45	0.927272	0.448063	0.69442	1.50303	1.10443		0.823426	0.404604	0.730986	0.894647	0.556332	0.879451	0.744372	0.871839		0.920417	0.779107	0.990971	0.693783	0.816583		0.657218	0.881934		0.776748	1.28621		0.662049	0.463756	0.549915	0.629209	0.9626		2.00469	1.0145		0.758066	0.687665		0.761987	0.716373	0.679974	1.16393	0.581605	0.961169	0.55021	0.731347
AFF4	54	1.04078	1.03796	1.0418	1.14516	1.18765	1.09372	1.20375	1.18132	1.22349	0.835088	0.859406	0.839534	1.14634	1.18375	1.19634	0.977515	0.925121	0.873995	0.99319	1.06264	1.0058	1.28044	1.2259	1.23871	1.25318	1.24919	1.24148	0.950041	0.960993	0.986005	0.886027	0.921631	0.916782	0.882242	0.955333	0.917122	1.0875	1.10604	1.08773	1.17302	1.11147	1.12936	1.24139	1.18036	1.16874	0.8833	0.918391	0.850966
AFG3L2	54	0.880302	0.871375	0.860857	1.00426	0.958903	0.896164	0.938705	0.95337	0.94555	0.778586	0.719932	0.755317	1.46495	1.48436	1.45006	1.11387	1.1179	1.09119	1.04483	1.01976	1.00751	1.0874	1.03755	1.03205	1.02414	1.05278	1.00132	1.10505	1.1128	1.09518	0.900756	0.865243	0.857626	1.06381	1.07682	1.05301	0.83163	0.826343	0.81577	0.808865	0.772554	0.770943	1.23796	1.31283	1.23514	1.26748	1.2657	1.28274
AFMID	45	0.902013	0.942045	0.795647	0.815808	0.770583		1.12309	0.630097	0.739609	0.784807	0.865548	1.11883	0.878161	0.660995		2.05433	1.84296	1.30589	1.20798	0.859397		0.891091	0.991927		0.911408	1.15603		0.519399	0.88703	0.775971	0.977571	0.881385		1.0448	0.948504		1.01753	0.907716		0.793054	0.982559	0.677758	0.944698	0.764976	0.737243	2.22619	2.07935
AFP	54	4.52969	7.15634	6.23346	1.42217	1.2148	1.68512	0.638156	0.54001	0.650929	0.73028	0.778051	0.785051	0.536908	0.457883	0.486974	1.38777	2.06389	1.42922	1.06793	1.03071	0.972353	0.474237	0.619993	0.692711	0.810623	0.809224	0.848597	0.749346	0.754467	0.670135	0.576216	0.607693	0.429235	1.04007	0.792148	1.24766	1.66669	1.52525	1.612	0.783917	0.725504	0.738105	0.826269	0.828849	0.842793	0.468508	0.362356	0.25088
AFTPH	54	1.28852	1.26102	1.27384	0.716664	0.691084	0.589058	0.831676	0.891611	0.928107	0.94927	1.001	0.931071	0.891428	0.879943	0.839946	1.27909	1.22414	1.33988	0.889982	0.890088	0.85175	1.06992	1.04726	1.12282	1.0536	1.09436	1.10017	1.07295	1.05006	1.12535	1.12471	1.07943	1.12033	1.19001	1.25593	1.38347	1.04755	1.07146	1.16855	1.00637	1.03421	1.07364	0.864758	0.900989	0.907842	1.05588	1.07259	1.06416
AGA	54	0.818398	0.621288	0.718276	0.714838	0.585194	0.558507	0.700687	0.674852	0.720588	0.809494	0.788992	0.667863	0.836445	0.771035	0.969308	2.24218	1.83219	2.22494	1.10741	0.99783	1.04228	1.05768	1.01258	1.08933	0.843119	0.87503	0.894068	1.11715	1.11712	1.10808	1.05925	0.926651	1.0187	1.38744	1.44636	1.43685	0.938951	0.931176	0.8182	1.13095	1.0873	1.17426	0.787968	0.7354	0.806016	0.7686	0.676409	0.790646
AGAP1	54	1.00188	1.05227	1.06668	0.730952	0.809984	0.851531	0.903538	0.985897	0.973591	1.06777	1.03933	1.08176	0.975803	1.03607	0.89762	1.14877	1.27782	1.2874	1.15021	0.959408	1.08307	0.564316	0.652785	0.400242	0.846214	0.877497	0.837914	0.953744	0.972318	0.912066	0.984202	1.0369	1.06037	0.991008	1.05507	0.925113	1.10152	0.988404	1.02843	0.986218	1.09133	1.11547	1.54186	1.5184	1.38033	1.05704	1.00358	1.02964
AGAP2	54	2.31535	1.78813	2.21561	0.522672	0.656578	0.383688	0.843585	0.853855	0.942047	0.853196	0.927961	1.08747	0.699663	0.738923	0.620832	0.753391	0.781866	1.08241	0.645187	0.7628	0.367037	0.683636	0.660822	0.37399	0.776521	0.824837	0.614385	0.634965	0.706415	0.597575	0.590192	0.760703	0.373724	3.70939	2.69263	3.57045	0.894774	0.897663	0.792605	1.06149	1.00589	1.02142	0.588221	0.609742	0.753104	0.92477	0.918131	0.822168
AGAP3	54	0.904219	0.904367	0.98604	1.01616	0.94021	1.00268	1.05695	1.05337	1.18176	0.920352	0.835072	0.944732	0.869503	0.98211	0.838381	0.721106	0.69982	0.78965	2.0309	2.00027	2.32615	0.7563	0.610964	0.76236	0.951949	0.838611	0.834228	0.62569	0.525459	0.667091	1.03026	0.994645	1.01801	0.938089	0.879595	0.802421	1.25709	1.16978	1.2186	1.24077	1.32845	1.34005	0.992647	1.28327	1.15518	0.780279	0.664524	0.77574
AGBL5	18		1.15484		0.749126				1.29662			0.991999		0.903612				1.35952		1.31606			0.962886			0.914574				1.00595		0.834057			0.911928			0.874113				0.993294			1.32986		0.830507
AGFG1	54	1.42358	1.46574	1.35257	1.01278	1.08049	1.09121	0.990296	1.00669	0.96886	1.12729	1.19857	1.17774	1.1391	1.21955	1.11602	1.05061	0.962801	0.961233	0.922113	0.956468	0.907923	0.958262	0.916041	0.887015	1.18356	1.17527	1.18008	1.32845	1.3461	1.27551	1.12504	1.1246	1.14645	0.985449	1.0268	0.960677	0.997959	0.977811	0.999349	0.941503	0.923324	0.958548	1.03278	1.03862	0.980304	0.986251	1.01863	0.971056
AGFG2	54	1.33906	1.2501	0.994804	0.843358	0.9008	0.892952	0.681217	0.673434	0.692005	0.604378	0.713647	0.708139	0.91237	0.893088	0.933968	1.1487	1.10618	1.03952	0.940352	0.916748	0.885472	1.73412	1.46269	1.70401	1.9275	1.72013	1.86452	1.03311	0.98071	0.999284	1.83273	1.69482	1.77503	0.949764	0.830072	0.855998	1.09016	1.0374	1.11837	1.23903	1.26022	1.18599	1.18603	1.1818	1.05984	1.23622	1.09881	1.15822
AGGF1	54	1.03056	0.95957	1.01727	1.13679	1.02648	1.07436	1.32194	1.27486	1.42046	0.802963	0.838849	0.794085	1.10211	0.920035	1.04704	0.930354	0.846694	0.872918	0.884831	0.854429	0.869436	0.931395	0.9124	0.9572	0.930167	0.98134	0.991995	0.849541	0.853711	0.72294	0.875754	0.794133	0.864361	1.44243	1.41727	1.41079	1.30433	1.46352	1.4163	1.50566	1.43569	1.57257	1.07038	1.04259	1.06902	0.757506	0.73405	0.790509
AGK	54	0.975581	0.955996	0.89115	1.49238	1.24951	1.38706	1.01957	1.02483	1.01194	1.05725	1.06422	1.12569	0.966359	1.00687	0.995462	0.98329	0.972718	0.960175	1.55279	1.54374	1.66308	0.779112	0.810778	0.742188	1.02732	0.99634	1.02108	0.744379	0.768491	0.733769	1.07552	1.07066	1.08639	0.914317	0.870725	0.898195	1.05095	1.03626	1.07577	0.995983	0.999705	0.971582	1.08593	1.09854	1.07241	1.27743	1.24915	1.36485
AGL	54	1.03041	1.00026	1.02469	0.706859	0.661746	0.679834	0.80137	0.754638	0.824642	0.909777	0.820277	0.879947	0.70679	0.684327	0.713386	1.4666	1.49652	1.39214	1.0268	1.07683	0.993626	1.29488	1.28379	1.36323	0.825134	0.782004	0.800991	1.59512	1.65253	1.59375	1.45644	1.46136	1.42651	0.886988	0.90235	0.885062	0.72907	0.687987	0.705801	0.713715	0.670264	0.672766	0.739817	0.675933	0.770757	1.21996	1.21749	1.18584
AGMAT	54	0.401104	0.402513	0.50034	0.930899	0.533743	0.840272	0.708394	0.758564	0.777932	0.437991	0.450797	0.530472	0.776666	0.475253	0.617401	0.686692	0.740339	0.654931	2.01146	1.74264	2.26504	1.11381	1.24204	1.24192	0.61285	0.616229	0.611795	1.92025	2.02512	2.15441	0.796498	0.861015	0.891189	1.54617	1.38464	1.44099	1.73578	1.49151	1.8696	2.08478	2.28305	1.87296	0.372774	0.380361	0.495587	0.449731	0.536293	0.425387
AGO1	54	1.00151	1.05412	0.984706	0.770465	0.75824	0.717238	0.838655	0.891083	0.846385	1.00308	0.931926	0.924096	1.02228	0.99663	0.980883	1.25671	1.14947	1.14667	1.24556	1.1615	1.21048	0.820666	0.901146	0.755208	1.08223	0.984728	0.999605	0.653825	0.617452	0.74133	1.27349	1.30444	1.4607	0.709213	0.73529	0.686068	1.09906	1.08891	1.03841	1.01476	1.08199	0.989345	1.60392	1.52138	1.50477	0.739262	0.719979	0.725247
AGO2	54	1.05796	1.02009	1.05161	1.0306	1.04516	1.06818	0.859044	0.851601	0.876234	1.08727	1.15832	1.12962	1.01351	0.9571	1.03305	1.50594	1.54928	1.62242	0.99794	1.00583	0.994418	1.26124	1.29104	1.3888	1.03529	0.99384	1.07758	0.782896	0.772595	0.781644	1.04199	1.04168	1.09119	0.947929	0.940837	0.966778	1.14355	1.11853	1.231	1.19312	1.19944	1.23632	0.709703	0.678527	0.699124	0.715235	0.686157	0.7814
AGO3	54	0.909875	0.907687	0.953411	1.01797	1.00792	1.10902	0.834972	0.740467	0.793724	0.997654	1.04915	1.06456	1.37775	1.43184	1.6754	0.852323	0.748981	0.900161	1.13214	1.1476	1.14756	0.956568	0.934463	1.04414	0.916417	0.9517	0.958047	1.03192	0.98026	1.03603	1.24948	1.24913	1.38878	0.770485	0.667542	0.687119	0.838144	0.755085	0.798274	0.840735	0.744737	0.818423	1.4899	1.42088	1.4182	0.870982	0.707674	0.766555
AGO4	45	0.570922		0.818612	1.08257	0.996569	0.96251	0.546379		0.689248	0.630542		0.842897	1.19494	1.53242	1.95658	1.17497		1.10737	1.14313	1.05759	1.35899	1.10404	1.60976	0.995113	1.09097	0.82808	1.14564	0.595517		0.919178	1.00864	0.85568	1.05369	0.818782	0.578579	1.11762	0.896241	0.839091	1.10121	0.716067		0.806281	0.894444		0.914472	0.931538	0.718694	1.20002
AGPAT1	54	1.02793	0.88014	1.09553	1.24702	1.39041	1.37761	0.720048	0.761719	0.81761	1.4695	1.42436	1.24628	1.56675	1.74102	1.64851	0.861559	0.675273	0.857577	0.997457	0.947339	0.9355	1.17413	1.01248	1.1148	0.846251	1.03881	0.894133	0.78872	0.743688	0.886255	0.833867	1.09725	0.923515	0.80436	0.847872	0.790912	0.773284	0.820061	0.821898	0.710701	0.673515	0.739323	1.58948	1.25776	1.33136	0.505246	0.623219	0.571487
AGPAT2	54	1.27957	1.46094	1.25897	0.961465	0.901302	0.848853	0.550549	0.664855	0.528353	0.77666	0.90441	0.927816	1.28487	1.18515	1.40759	0.879952	0.920291	0.913756	0.974253	1.05656	1.00065	1.3229	1.10555	1.31497	0.999052	0.959216	1.00496	0.814163	0.899473	0.85351	1.09408	1.0456	1.22327	0.723323	1.02505	0.86739	1.22994	1.26337	1.16197	1.06177	1.12909	1.11106	0.970828	0.928976	0.890946	0.818181	0.792457	0.894199
AGPAT3	54	0.831528	0.791755	0.774603	0.81413	1.00297	0.792904	0.712576	0.78287	0.694835	0.957642	1.08979	1.02263	1.962	2.27769	2.05343	1.44684	1.46175	1.45665	0.643766	0.603997	0.596308	0.895929	0.76742	0.806528	0.830145	0.857364	0.781168	0.716872	0.706627	0.676356	0.991878	1.02018	0.959556	0.804469	0.853496	0.798377	1.16386	1.15978	1.11946	1.37665	1.43665	1.40082	1.10767	1.23096	1.15017	0.929859	0.923039	0.889948
AGPAT4	54	0.538341	0.49067	0.590289	3.60837	2.3109	2.309	1.30186	1.38145	1.31451	0.931611	0.919036	1.10199	1.65819	1.38101	1.6893	0.671585	0.791049	0.764919	1.27066	1.2324	1.43395	0.756711	0.652306	0.966255	0.71793	0.649557	0.993832	0.901754	0.830863	0.704065	0.500744	0.597403	0.918611	0.566754	0.607714	0.760093	0.565127	0.526557	0.788275	0.620994	0.789624	0.412259	1.68091	1.41391	1.49999	0.763058	0.790976	0.969636
AGPAT5	54	0.784467	0.724506	0.812337	1.92192	1.44547	1.45422	1.0656	1.15902	1.06304	0.757853	0.746262	0.79332	1.06453	1.07648	1.0426	0.704081	0.705658	0.705109	0.896437	0.940471	0.911084	0.929207	0.965168	0.979572	0.945559	0.883663	0.888199	1.62678	1.64646	1.72642	0.607171	0.740234	0.60029	0.989783	0.940687	0.847936	0.945966	1.03133	0.878011	0.810898	0.730246	0.806191	0.797068	0.875556	0.804284	1.18035	1.10117	1.0332
AGPAT6	54	0.857455	0.81519	0.909501	2.16186	1.72811	1.97035	0.824073	0.782934	0.785578	0.929805	0.886684	0.849623	0.788658	0.753361	0.747061	1.15942	1.15299	1.13112	1.90596	1.91588	2.06806	1.09317	0.939028	1.07331	0.959743	0.866956	0.966674	0.803114	0.804776	0.807402	0.648307	0.558117	0.432474	0.771315	0.715221	0.77431	0.668433	0.594308	0.719234	0.828429	0.714345	0.764839	1.35784	1.31836	1.32541	0.712159	0.657689	0.637824
AGPAT9	54	1.31994	1.38835	1.23167	0.675198	0.558104	0.566895	0.967509	0.824258	0.888809	2.27534	2.01514	1.94065	0.422906	0.600439	0.411739	0.467655	0.603176	0.557646	1.13559	1.24307	1.51451	1.30933	1.2697	1.53785	1.76129	1.32133	1.82539	2.8609	1.90268	2.12871	0.440978	0.548579	0.41697	0.513426	0.530575	0.392087	0.638557	0.642425	0.471919	0.727012	0.724259	0.664855	0.549398	0.559982	0.522858	0.478622	0.525919	0.412551
AGPS	54	2.00573	2.17067	1.95305	0.69253	0.623655	0.673034	1.09487	1.11599	1.12146	1.76312	1.9719	1.74086	0.856714	0.7704	0.831163	0.900896	0.865704	0.879305	0.624748	0.690044	0.638702	1.50715	1.60554	1.49225	0.660358	0.64648	0.65373	1.62772	1.70859	1.60489	1.10555	1.14669	1.12435	0.315439	0.350481	0.355484	0.300154	0.34126	0.332069	0.506663	0.434732	0.501111	1.28245	1.29829	1.26907	0.321886	0.326945	0.369825
AGR2	54	0.431097	0.425799	0.473168	0.402524	0.475737	0.386309	1.32987	1.35941	1.26214	0.558408	0.548806	0.551975	0.395153	0.464054	0.39982	2.27525	2.15536	2.17081	0.419497	0.507382	0.354452	0.587819	0.642758	0.571002	0.57533	0.589157	0.513788	0.460459	0.410824	0.506966	1.80237	1.69334	1.7173	0.595799	0.629539	0.524626	3.46495	3.20674	3.31074	2.80452	2.78405	2.70315	0.559792	0.597761	0.585849	0.778903	0.808757	0.726183
AGR3	54	0.634275	0.432723	0.715937	0.52026	0.543591	0.543762	0.646365	0.58011	0.594833	0.571516	0.457585	0.635257	0.373421	0.60033	0.358113	3.58898	4.47291	3.82711	0.560745	0.527657	0.414812	0.497722	0.60725	0.457853	0.406683	0.553463	0.405266	0.605241	0.477199	0.665387	1.05483	1.12902	1.00587	0.572781	0.537106	0.472924	3.95392	3.89677	3.55262	1.51411	1.83434	1.48751	0.613839	0.514852	0.631661	0.371868	0.502232	0.315364
AGRN	54	1.08353	1.10642	1.04898	0.943599	0.801893	0.847126	1.6031	1.66075	1.59903	0.852555	0.798678	0.842204	1.05083	1.03219	1.02037	0.588999	0.507231	0.584976	1.67975	1.54538	1.57423	1.13459	1.08653	1.1466	1.00877	0.960151	0.99735	0.843174	0.840184	0.800033	1.70953	1.72918	1.72613	0.655626	0.652648	0.722801	0.769621	0.752027	0.769234	0.815703	0.763408	0.78637	1.10058	1.172	1.09994	0.847044	0.847392	0.87175
AGT	18				1.03798	0.751639								0.826843	1.21479					2.64415	3.7566		0.74268	0.513172		0.87318	0.580409					1.27386	1.51592		0.752679	1.17961		0.834576	0.546104								0.760689	0.73907
AGTPBP1	54	0.971865	0.956983	1.02168	1.17345	1.44916	1.37653	1.53554	1.59452	1.56001	1.04256	0.945249	1.05239	1.04195	1.06293	1.00144	1.21222	1.10243	1.26829	0.900292	0.902048	0.886115	0.816931	0.78453	0.781042	0.821261	0.7897	0.714594	0.936393	0.847616	0.843572	0.861082	0.87357	0.872706	0.970281	0.86686	0.866048	0.829234	0.820345	0.862611	0.757238	0.773168	0.767091	0.74675	0.726628	0.772721	1.40775	1.4361	1.34829
AGTRAP	54	0.871922	0.971504	0.894509	1.30047	1.25777	1.25303	1.04636	0.853736	1.07462	0.948614	0.970077	0.969788	0.818349	0.836639	0.887608	1.27347	1.2412	1.28683	1.19669	1.16208	1.09874	1.19606	1.00756	1.09249	1.02835	0.870261	1.07946	0.927547	0.921126	0.879856	1.43146	1.37053	1.52081	0.775469	0.704761	0.753655	0.825489	0.745006	0.80034	0.831881	0.821962	0.832246	1.06503	0.987269	1.21087	0.789733	0.728965	0.727084
AHCTF1	54	1.16223	1.13793	1.12992	1.26618	1.10091	1.14057	1.25965	1.28734	1.32157	0.987174	0.983057	1.01624	1.1389	1.11833	1.0843	0.979537	0.964178	0.975492	1.2357	1.18874	1.21389	1.02188	0.990845	0.997549	1.18575	1.19446	1.23284	1.02184	1.02525	1.0341	0.957122	0.909306	0.913636	0.952761	0.956109	0.961602	0.757565	0.774499	0.762294	0.916198	0.89889	0.924932	1.0498	1.06445	1.09281	0.978449	1.01068	1.01396
AHCY	54	1.35474	1.43814	1.38385	0.801863	0.799818	0.78825	0.998414	0.979023	0.985756	1.28527	1.33303	1.24766	0.763305	0.755376	0.785123	1.45972	1.48773	1.44922	1.04772	1.04304	1.00558	0.94783	1.01668	0.981403	0.703565	0.69671	0.68822	1.22847	1.22611	1.20978	0.639861	0.664211	0.65005	1.05806	1.03994	1.02742	0.766801	0.76449	0.771796	0.804137	0.764965	0.783564	0.91036	0.875328	0.895793	0.925676	0.943619	0.922568
AHCYL1	54	1.26429	1.31515	1.30842	0.977265	0.966713	0.995445	1.20657	1.17276	1.22882	0.84821	0.850977	0.944343	0.741046	0.819678	0.792875	1.18255	1.23666	1.23419	0.619268	0.652693	0.672571	1.00079	1.04646	1.02546	0.894633	0.974101	0.918357	1.4789	1.44423	1.45016	0.840536	0.878273	0.937504	1.03871	1.09344	1.07326	0.883628	0.892144	0.925892	0.78745	0.814046	0.827288	1.02954	1.02167	1.07269	0.963909	1.09201	0.967341
AHCYL2	54	1.07741	1.25028	1.17114	0.907508	0.972172	0.957284	0.935205	0.995573	1.02052	1.16742	1.30376	1.15048	0.853332	0.850024	0.94583	1.81142	1.95735	2.13993	0.792355	0.750732	0.842091	0.970331	1.01811	1.03176	1.10201	1.02403	1.03581	0.973466	1.0204	1.02355	0.947587	0.901426	0.956585	0.942363	0.991264	1.04022	1.07209	0.962066	1.11063	1.02802	0.934036	0.95642	0.896139	0.934918	0.932091	0.917807	0.916083	0.981231
AHDC1	54	0.771069	0.767262	0.852288	0.93393	0.939986	0.869309	0.866522	0.906544	0.859464	1.03765	1.06436	1.05843	1.61088	1.51805	1.42538	0.700176	0.769399	0.746603	1.04284	1.11631	1.05308	0.860036	0.920392	0.838382	0.958318	0.934581	0.906545	0.670233	0.660422	0.771777	2.02084	1.8043	1.64108	0.665304	0.7764	0.756648	1.14346	1.0761	1.15962	0.944143	1.02777	1.01903	1.34123	1.27809	1.34486	1.14836	1.17449	1.1166
AHI1	54	0.668747	0.900176	0.915404	1.47245	2.44253	1.75022	1.00662	0.964662	1.2894	0.765159	0.828782	0.80885	1.02511	1.01399	1.05836	1.14683	1.0889	1.11384	0.860897	0.972517	0.941721	0.968453	1.03362	1.02814	0.976338	0.960414	0.838153	0.963635	1.42065	1.1117	0.98336	0.951719	1.07895	1.11193	1.09176	1.01966	1.06616	1.00192	1.02221	0.996602	0.827689	1.12071	1.20964	0.971791	1.12506	0.768928	0.633526	0.864504
AHNAK	54	1.08475	1.1054	1.0981	0.684608	0.667742	0.654241	1.42374	1.43372	1.43378	1.45567	1.49076	1.45293	0.635042	0.600101	0.627645	0.709969	0.730691	0.728122	0.510808	0.545788	0.491038	1.13817	1.12714	1.1169	0.90337	0.914056	0.903649	1.18994	1.21422	1.18893	0.959506	0.96769	0.966979	0.829798	0.838702	0.832251	0.991663	0.987024	0.980417	0.838586	0.831781	0.846086	1.38041	1.41686	1.37708	1.20877	1.21734	1.21507
AHNAK2	54	0.599982	0.606019	0.589411	1.36714	1.25211	1.30605	0.600976	0.583491	0.539248	4.44909	4.76344	4.84873	0.364304	0.325904	0.341713	0.554834	0.557433	0.506035	0.31096	0.340563	0.289651	0.606936	0.545499	0.525991	0.331168	0.31937	0.301786	1.26967	1.35156	1.2498	0.989244	0.956826	0.976289	0.275943	0.258072	0.236327	0.27409	0.27446	0.260162	0.524486	0.48593	0.463435	1.30575	1.30155	1.37045	0.274569	0.243765	0.226322
AHR	54	0.662397	0.687206	0.663903	0.941668	1.24851	1.06891	1.11601	1.07216	1.07033	1.25795	1.18789	1.26489	1.01768	1.06523	0.947965	0.598428	0.624485	0.562912	0.518022	0.542279	0.516659	0.982659	1.01934	0.99718	1.41609	1.38265	1.4277	0.788752	0.83952	0.787811	2.50246	2.59996	2.50805	0.59396	0.518141	0.555979	0.872354	0.796321	0.800098	0.654129	0.714154	0.716918	1.35735	1.28181	1.28763	1.11129	1.29807	1.11539
AHSA1	54	0.866679	0.874598	0.902833	0.863284	0.936874	0.932325	1.09022	1.09061	1.10376	0.871616	0.882698	0.908073	0.945619	0.93718	0.930687	1.03016	1.02908	1.02656	0.864495	0.89326	0.880482	0.966138	1.04388	1.01723	1.04089	1.04914	1.04232	0.97263	0.984041	0.976366	0.854815	0.853335	0.852588	1.29395	1.30389	1.28863	1.19634	1.20505	1.1949	1.12915	1.14718	1.1431	1.16793	1.16762	1.15329	1.13804	1.14946	1.13223
AHSG	54	4.78071	6.65832	5.92595	1.38318	1.03128	1.08342	0.654635	0.623274	0.649945	0.654071	0.77385	0.691262	0.477512	0.625019	0.460228	1.40501	1.81794	1.46869	1.07642	1.00273	0.862907	0.464301	0.576043	0.429151	0.88917	0.916321	0.82532	0.717679	0.757345	0.781586	0.54657	0.661531	0.51363	1.1069	1.10582	1.30268	1.67461	1.52314	1.56002	0.82767	0.791908	0.773178	0.815244	0.810426	0.768938	0.43557	0.578864	0.415249
AIDA	54	1.04106	1.1322	1.09612	1.02682	1.03009	1.03912	0.765469	0.805848	0.832009	1.61875	1.6692	1.64457	1.08167	1.06887	1.04417	0.82651	0.886883	0.844271	1.27109	1.28964	1.34794	0.8215	0.812386	0.797409	1.08795	1.06183	1.07839	1.34476	1.3343	1.33967	0.848116	0.795316	0.83736	0.73206	0.716212	0.798077	0.845492	0.691037	0.731474	0.717101	0.666244	0.699811	1.38645	1.35839	1.45905	0.929003	0.902965	0.843231
AIF1L	54	1.31522	1.38371	1.33562	0.616331	0.588875	0.569505	0.777039	0.729948	0.705984	0.765032	0.812819	0.806946	1.376	1.29219	1.43041	0.634952	0.734957	0.603793	1.64183	1.71893	1.80567	0.858485	0.876018	0.901286	1.09447	1.06755	1.06184	0.746332	0.749377	0.72122	0.842731	0.86606	0.867754	1.24441	1.21196	1.28149	1.59415	1.68394	1.6597	1.41686	1.44639	1.36955	0.463564	0.508571	0.44493	0.754364	0.796896	0.747497
AIFM1	54	1.25901	1.27394	1.26302	1.86307	1.624	1.65484	0.798882	0.813752	0.802229	0.767885	0.756338	0.770486	0.859634	0.907228	0.878591	1.25469	1.2418	1.20249	0.846685	0.854709	0.864885	1.09677	1.06104	1.05056	1.05834	1.06884	1.05197	0.816537	0.804248	0.840234	0.88113	0.894874	0.859904	1.43586	1.41362	1.46905	1.10815	1.1054	1.08191	1.0785	1.06064	1.08115	1.07093	1.06503	1.01901	1.34565	1.33398	1.35336
AIFM2	54	1.19611	1.44117	1.26864	1.76261	1.59097	1.58347	0.673842	0.604649	0.605166	1.01188	0.922295	0.924921	0.687912	0.868587	0.783904	0.728179	0.708174	0.78552	0.487763	0.656102	0.524648	0.696684	0.814282	0.772884	0.639688	0.708755	0.637517	1.58007	1.90135	1.69815	1.12403	1.16142	1.1673	1.2607	1.32154	1.21649	0.930781	0.805494	0.880233	1.09762	1.25179	1.09435	0.916584	0.836225	0.869074	0.861087	0.945316	0.754119
AIM1	54	1.39843	1.36256	1.33388	0.608559	0.57626	0.544484	0.491431	0.453786	0.484931	1.06976	1.04623	1.05647	0.594679	0.537072	0.541235	1.1753	1.17783	1.17406	0.973009	0.94496	0.948651	1.48211	1.60628	1.57146	1.74815	1.73472	1.9206	1.54313	1.57202	1.54639	1.32324	1.34661	1.3666	0.753292	0.736554	0.703452	0.862051	0.834585	0.858659	0.840406	0.828318	0.84606	0.722761	0.691349	0.736062	1.2713	1.29374	1.31219
AIM1L	54	1.77238	1.84729	1.39336	0.726708	0.673484	0.809228	1.06398	1.17596	1.08822	0.655059	0.633867	0.733192	0.778177	0.663983	0.772788	1.01785	0.717483	0.817712	0.747387	0.759568	0.848692	1.59969	1.8185	1.80505	0.990709	0.920159	1.01941	0.651089	0.61619	0.767085	2.53575	3.3099	2.85205	0.82322	0.636844	0.724755	0.725214	0.679584	0.67084	0.629528	0.549652	0.691225	0.676064	0.584451	0.78324	0.935995	0.807914	0.926041
AIMP1	54	1.07268	1.06532	1.05677	0.877046	0.933237	0.933413	1.07286	1.07339	1.07052	0.881029	0.925848	0.898546	0.943221	0.922953	0.904068	0.943155	0.925514	0.963541	0.896927	0.919982	0.939041	1.48153	1.4402	1.43364	1.15523	1.11188	1.12563	0.897077	0.920169	0.896884	1.09387	1.07397	1.08067	1.07966	1.07967	1.09867	0.974895	1.01788	0.988115	1.01407	1.01387	1.0242	1.1634	1.189	1.13453	1.24713	1.22436	1.28495
AIMP2	54	1.29552	1.28744	1.26246	0.95877	0.973303	1.00896	1.07689	1.06722	1.06116	0.943881	0.931201	0.949592	1.01314	1.00472	1.01471	0.920543	0.924996	0.918993	0.886159	0.974041	0.911589	1.36672	1.27623	1.35993	1.10839	1.08725	1.10249	0.879257	0.898462	0.888017	1.21876	1.18292	1.17829	1.09337	1.06982	1.02783	1.00612	1.01851	1.01046	0.997737	0.968211	0.940941	1.16452	1.14058	1.10577	1.18398	1.1874	1.1878
AIP	54	0.795881	0.761615	0.826193	0.892326	0.859675	0.939453	0.801659	0.819401	0.838506	1.02478	1.04271	1.00193	0.944038	0.949317	0.969581	1.26319	1.27439	1.26765	1.21488	1.18117	1.2564	0.873683	0.903569	0.905187	0.786404	0.737915	0.73568	0.950377	0.988727	1.00178	1.03492	1.03855	1.04518	1.30836	1.29094	1.26263	1.18433	1.14166	1.19018	1.05426	1.10483	1.1245	1.13691	1.19715	1.11798	0.7441	0.732168	0.786535
AJUBA	54	0.980684	1.01783	0.951767	1.08787	0.987917	1.06331	1.39844	1.33097	1.41027	1.01609	0.986653	1.06002	0.875225	0.744787	0.785748	0.607089	0.719946	0.662072	1.37228	1.54478	1.43021	1.68773	1.92074	1.70328	1.57855	1.978	1.61697	0.988854	1.06039	1.01428	0.844208	0.766737	0.792559	0.803855	0.703625	0.667893	0.835202	0.7602	0.721589	0.841766	0.934751	0.88936	1.48642	1.38628	1.39396	0.840256	0.84427	0.759038
AK1	54	0.817708	0.786679	0.817892	0.735814	0.775647	0.749689	0.887796	0.924539	0.883661	1.3663	1.39416	1.42386	0.95853	0.978549	0.946176	0.86022	0.892894	0.866107	1.05675	1.08682	1.0362	1.23896	1.36728	1.31575	1.02406	1.06396	1.00084	1.03573	1.12227	1.1295	1.29717	1.31885	1.3281	0.865539	0.893011	0.792379	0.859322	0.836506	0.822151	0.782072	0.837812	0.805881	0.870205	0.889588	0.886221	1.28557	1.34615	1.256
AK2	54	0.991512	0.988761	0.977491	1.54574	1.36302	1.37856	0.842327	0.79672	0.82147	0.755273	0.766196	0.760515	1.13369	1.14723	1.16283	1.07001	1.07585	1.05382	1.50689	1.42339	1.53273	1.11897	1.1118	1.08694	0.973067	0.940618	0.970142	1.08155	1.08868	1.1151	0.924114	0.924786	0.944065	0.912377	0.901572	0.949287	0.888628	0.885023	0.902036	0.829037	0.799036	0.790741	0.963605	0.947323	0.969595	1.04192	0.997154	1.05413
AK3	54	0.958497	0.944809	0.919111	1.4931	1.38541	1.36357	0.843708	0.846124	0.813051	0.765612	0.685797	0.72756	0.676478	0.686676	0.681777	0.771177	0.772872	0.728647	0.905094	0.813648	0.871949	0.81111	0.796074	0.786957	1.04595	1.06212	1.01641	1.79888	1.78071	1.79657	1.25501	1.27991	1.30633	1.06586	1.13603	1.08196	1.33004	1.39767	1.3344	1.21896	1.20867	1.12644	0.912371	0.933513	0.93232	0.852965	0.9079	0.86376
AK4	54	0.606881	0.554709	0.632737	0.962726	0.980153	0.944721	0.478735	0.49503	0.529914	0.832782	0.833652	0.796728	1.09622	1.15938	1.18296	2.03242	2.06976	1.99671	0.668117	0.633335	0.611901	1.1537	1.18624	1.1971	1.23689	1.31613	1.304	0.604305	0.652103	0.642379	1.95185	1.87786	2.09664	1.17905	1.31849	1.31004	0.87403	0.899859	0.860781	0.964551	0.917889	0.963361	0.98302	0.966306	1.00181	0.618919	0.616281	0.550185
AK5	45	0.58954	0.44769		3.87663	3.49919	1.84027	0.716058	0.683337		1.244	0.961578		0.44112	0.538239	0.762526	0.76957	0.598816		0.434048	0.43849	1.37552	0.578891	0.589826	0.953148	0.430249	0.431465	1.00885	1.20459	1.55307		2.53174	2.47026	1.15437	0.401406	0.416098	1.13574	0.377825	0.355684	1.01788	0.798203	0.711263		1.77361	2.60385		0.390447	0.468269	0.96413
AKAP1	54	0.715352	0.709987	0.730522	0.878223	0.778393	0.865962	0.938343	0.936033	0.917452	0.966858	0.988287	1.00752	0.930922	0.863046	0.872543	0.644965	0.624571	0.644401	1.23607	1.19093	1.28924	1.07725	1.0018	1.02325	1.18681	1.15734	1.19093	1.03549	1.00959	1.09047	1.11777	1.13758	1.15791	1.27097	1.28742	1.38412	1.21908	1.17468	1.27231	1.91111	1.83774	1.82536	0.650574	0.668137	0.680139	1.11766	1.10552	1.11388
AKAP10	54	1.22606	1.31525	1.34985	1.03125	1.03903	1.16765	0.932641	0.835344	0.959683	1.03943	1.09185	1.06459	0.706289	0.683328	0.756914	1.82169	2.2339	2.00592	0.805769	0.834206	0.906132	0.986872	0.919463	1.04853	0.976078	0.929433	0.945186	0.883651	0.882934	0.892157	0.752241	0.746696	0.817712	0.923361	0.844426	0.850715	0.989063	1.00189	0.92881	1.09519	1.1295	1.18687	0.996186	1.07319	1.08878	0.780604	0.733305	0.766738
AKAP11	54	1.12222	1.07073	1.05488	1.4413	1.41895	1.39148	0.725255	0.756523	0.724146	0.786005	0.771094	0.783073	1.28409	1.25549	1.23078	0.767082	0.744709	0.759518	0.83049	0.853451	0.85342	1.09478	1.06159	1.05489	0.999106	1.02855	1.0051	1.89313	1.62071	1.67879	0.785685	0.785785	0.797958	1.25047	1.34729	1.31156	1.08471	1.17296	1.18381	1.16751	1.11636	1.12501	0.988916	0.973932	1.03192	0.857742	0.830316	0.870412
AKAP12	54	0.901591	0.919323	0.909194	0.53663	0.543085	0.56524	3.15119	3.39416	3.48825	1.97214	2.19398	2.05238	0.315694	0.219852	0.29191	0.555282	0.613177	0.557994	0.273411	0.269118	0.207731	0.990306	0.948418	0.993473	0.27499	0.257365	0.231271	1.44602	1.47857	1.43451	0.215012	0.203033	0.163593	0.18742	0.188121	0.169701	0.242158	0.225806	0.214005	0.554527	0.520446	0.526637	1.43491	1.54302	1.58648	0.209923	0.192996	0.158172
AKAP13	54	1.46283	1.50605	1.46281	1.19037	1.19198	1.20184	0.945184	0.912207	0.899874	0.954736	0.934816	0.913438	0.870734	0.88817	0.856967	0.838357	0.853159	0.815636	0.889481	0.820583	0.887369	0.766174	0.706732	0.724972	1.28682	1.34999	1.23844	1.13999	1.13716	1.12341	1.37753	1.34524	1.30893	0.960709	0.961546	0.946754	1.02604	1.03579	1.06158	1.22189	1.15812	1.18043	1.55934	1.59518	1.45551	0.867249	0.860374	0.861667
AKAP17A	54	0.809165	0.823828	0.851217	1.43105	1.37563	1.29927	1.23521	1.21958	1.29597	0.80742	0.751406	0.770753	1.19748	1.13753	1.0731	1.04163	0.926943	0.931769	1.20743	1.15979	1.18585	1.04975	1.01539	0.988259	1.1444	1.21185	1.27091	0.54315	0.505489	0.501296	0.671598	0.743549	0.69891	0.952188	0.965113	1.03502	1.13367	1.13492	1.15171	1.22053	1.19931	1.09827	1.53579	1.57882	1.57299	1.12967	1.18107	1.13544
AKAP5	54	0.596	0.51754	0.487452	0.874253	1.13354	0.964622	3.79063	3.9579	3.43571	1.09514	0.919566	1.06893	0.955661	1.0281	0.902821	2.06348	1.95018	1.86021	0.30259	0.583124	0.755747	0.54334	0.662768	0.824532	0.433509	0.613634	0.741515	1.01634	0.925955	0.802873	1.10144	1.13989	1.02097	1.31675	1.15835	1.20022	1.03863	1.08754	1.04786	1.09873	1.37945	1.07074	0.746319	0.732818	0.721159	0.237285	0.420612	0.59614
AKAP7	27	0.816297	0.792664	0.740301				1.72566	2.67525	2.1445	1.02873	0.827438	0.861219				1.03631	0.897136	1.36558										1.72509	1.95909	1.69097										0.739149	0.49997	0.697009	1.03023	1.06451	0.820373
AKAP8	54	0.885605	0.919396	0.888399	0.975698	0.916178	0.936257	1.03541	1.08768	1.05206	1.94958	2.08954	2.01515	1.19373	1.0825	1.12304	1.03171	1.07589	1.01265	0.928346	0.994092	0.920608	1.30768	1.19594	1.29043	0.947034	1.00933	0.977986	1.05277	1.14623	1.05545	0.946566	1.01469	0.945056	1.07806	1.08746	1.10621	1.00789	1.02821	1.02739	1.00776	1.01991	0.992989	0.878931	0.90652	0.930687	0.84238	0.869698	0.840169
AKAP8L	54	0.825052	0.851449	0.870383	1.03103	0.990266	0.990233	0.901815	0.897016	0.871811	1.42086	1.67503	1.5401	1.51197	1.35618	1.34279	1.00501	0.949275	0.954632	1.07471	1.0931	1.13082	1.35777	1.26693	1.23589	0.91932	0.974998	0.914897	0.907969	0.943916	0.898106	1.0265	1.09295	1.05658	0.949937	0.979959	0.967556	0.933322	1.03421	0.971365	0.938003	0.913323	0.947288	0.952296	0.991948	0.95672	0.866133	0.933378	0.938225
AKAP9	54	0.828962	0.831272	0.798267	0.853851	0.813184	0.810602	0.835583	0.851387	0.808422	0.916866	0.891957	0.918088	1.02853	1.00641	0.989321	1.28601	1.28453	1.28384	0.894515	0.84832	0.874454	0.773138	0.768187	0.753566	0.981019	0.98767	0.979424	0.967828	0.979969	0.964685	1.13914	1.15769	1.1622	1.06151	1.11568	1.0975	1.44109	1.52404	1.50137	1.48979	1.50502	1.49083	0.941098	0.950569	0.953093	1.38202	1.49876	1.44147
AKIP1	45	1.10293	1.08459	1.14044	1.69785	2.23199		0.858995	1.21417	1.09799	1.30979	1.35319	1.4016	1.13662	1.40273		1.37404	1.06247	1.09065	0.747028	0.716469		1.08073	1.36127		0.969497	1.21799		0.70816	0.897646	0.930197	0.804918	1.30194		0.633645	0.858849		1.27562	0.882312		1.01614	1.04935	1.13642	1.41723	1.28649	0.96434	0.985919	0.933217
AKIRIN1	54	1.0728	1.32429	1.49883	1.16328	1.28063	1.44778	1.17132	1.48595	1.30767	0.531595	0.797807	0.810588	1.23758	1.15796	1.06315	0.945036	0.761784	1.2444	0.837399	0.959207	1.02274	1.08454	1.14446	1.05191	1.24104	1.09514	1.18644	0.910376	1.61619	1.27033	1.04256	0.960984	1.2619	1.01123	1.14744	1.17129	0.95076	0.920683	0.862923	1.23183	1.12568	1.17354	0.569062	1.10036	0.933355	1.03535	1.11684	1.18457
AKIRIN2	54	1.19266	1.27996	1.19038	1.31194	1.32447	2.14865	0.996121	1.05686	1.02293	0.905458	1.0252	0.807129	1.13526	1.14286	1.02825	1.00796	1.02661	0.862009	0.79031	0.757213	0.723337	1.26473	1.03202	1.2392	1.04369	1.10645	1.15425	0.939635	0.937805	0.94695	0.913175	0.95962	0.964827	1.08158	1.2146	1.17212	1.04242	1.097	1.10133	1.11982	1.08313	1.17481	0.852454	0.879052	0.885506	0.994821	1.04835	1.08625
AKNA	54	1.08956	1.20438	1.05353	1.02402	1.07346	1.05602	0.844641	1.02323	1.05321	1.19401	1.2862	1.23569	0.991793	0.976595	0.962012	0.923737	0.972755	1.10202	0.801728	0.938627	0.734312	1.21297	1.22441	1.01154	0.980656	1.03223	0.938037	0.87337	1.1335	0.99389	1.14337	1.01635	1.23166	0.915264	0.860747	0.922689	1.12588	0.924563	1.13803	0.960903	1.14947	1.05275	0.819246	1.13858	0.852023	0.91555	0.947134	0.864712
AKR1A1	54	0.662716	0.588418	0.67705	0.81287	0.919746	0.818376	0.830588	0.790433	0.821148	0.833668	0.758349	0.840451	1.62978	1.82135	1.66865	2.16645	2.20538	2.13101	0.654706	0.704291	0.67659	0.811886	0.839335	0.830333	0.896313	0.981112	0.924987	0.66029	0.581356	0.649453	1.34381	1.34935	1.36521	0.805333	0.847443	0.815471	0.872116	0.8584	0.850082	0.758583	0.719286	0.793517	0.893771	0.899872	0.893845	1.64699	1.66737	1.63404
AKR1B1	54	4.05368	4.46969	4.54811	0.966543	1.00375	0.993346	0.683403	0.644625	0.657155	0.650033	0.623712	0.655505	0.436109	0.386721	0.450778	0.724963	0.888554	0.778252	0.46668	0.61964	0.438625	1.71349	1.71341	1.80259	0.316669	0.322777	0.259082	1.21867	1.20309	1.18634	1.28378	1.26368	1.28012	0.313042	0.331906	0.281504	0.339279	0.330705	0.275751	0.535091	0.533146	0.448964	1.05185	1.09316	1.03689	0.327394	0.356762	0.283478
AKR1B10	54	5.40763	5.36664	5.23095	0.557776	0.562505	0.570895	0.605659	0.503398	0.631441	0.781672	0.688144	0.787622	0.664915	0.7569	0.663446	0.959822	1.22561	1.06932	0.672459	0.558021	0.602508	1.1519	1.08497	1.18371	2.36278	2.68541	2.44709	0.978056	0.968958	1.03226	1.80639	1.79591	1.65847	0.624752	0.413621	0.521534	0.655379	0.523706	0.528404	0.589198	0.504185	0.648183	0.649927	0.549888	0.605295	0.51848	0.44485	0.538334
AKR1C1	36			0.671243	0.693427	0.720602	0.749162			1.05284			0.927371	0.65803	0.767998	0.707721			0.721109	0.768513	0.788038	0.737629	0.851373	1.09428	0.904497	1.20062	0.870541	0.9368			3.94509	1.08187	2.44211	2.43159	0.679873	0.758516	0.704772	0.596577	1.25242	0.995921			0.656482			0.743948	0.609908	0.847443	0.791316
AKR1C2	54	0.745874	0.540338	0.617879	0.730369	0.685177	0.265497	0.943734	0.531982	0.866474	0.705121	0.475852	0.830731	0.872796	0.822865	0.727193	0.390125	0.369499	0.646563	0.681876	0.783608	0.318684	1.32418	1.24475	1.06562	0.785504	0.881824	1.07769	2.2558	2.63479	1.98669	1.20723	1.10829	1.17729	0.624466	0.759905	0.368383	2.36038	1.86432	1.49341	1.19107	2.95169	0.965931	0.424314	0.184727	0.331046	0.571133	0.732013	0.398766
AKR1C3	54	0.791231	0.811981	0.839751	0.619992	0.564623	0.644255	0.400939	0.398926	0.442431	0.549352	0.520863	0.598814	0.624261	0.556819	0.673455	0.54748	0.577026	0.642134	0.52556	0.606054	0.579267	1.24089	1.19141	1.29586	0.720807	0.622779	0.70484	1.44003	1.44679	1.3577	4.81754	5.01418	4.04464	0.491363	0.559766	0.510197	1.33813	1.36539	1.26378	0.475199	0.497743	0.486966	0.487962	0.465779	0.55446	0.606958	0.589218	0.554786
AKR1D1	9						0.69665									1.03779						0.942069			1.14126			1.03046						1.8891			0.8508			1.19634									0.831889
AKR1E2	9	1.84232						0.823522			1.33871						1.39128												1.05845												1.29251			0.707238
AKR7A2	54	1.12552	1.0901	1.0641	0.818673	0.732545	0.829421	0.827289	0.76263	0.756441	0.758777	0.688787	0.814949	0.767581	0.759975	0.797277	1.77046	1.86328	1.81304	0.756496	0.738883	0.773266	0.945567	0.962762	0.955207	0.93677	0.889972	0.916372	0.876727	0.837775	0.884788	1.23962	1.23315	1.2365	0.884486	0.873809	0.942625	1.18659	1.18533	1.19662	1.0545	1.00915	1.02974	1.07844	1.08038	1.07321	0.892923	0.894052	0.933332
AKR7A3	54	0.798287	0.650655	0.789752	0.947661	0.6469	0.439391	0.767205	0.700665	0.745203	0.734078	0.665856	0.80354	0.86183	0.384419	0.380905	3.68934	6.52354	4.85815	0.826963	0.544322	0.396958	0.739044	0.445774	0.341961	0.769602	0.263757	0.445619	0.911614	0.653513	0.777156	0.651924	0.391263	0.414482	0.757913	0.27787	0.355024	0.75302	0.318692	0.405353	0.721078	0.873823	0.506487	0.666105	0.705241	0.601346	1.1337	0.872023	0.856723
AKT1	54	0.66774	0.685172	0.716789	0.750029	0.764073	0.733414	0.708948	0.649339	0.69142	1.39047	1.3304	1.31547	1.09388	1.09966	1.0331	1.14872	1.14149	1.14702	0.689496	0.671685	0.663448	0.590032	0.634291	0.63197	0.681147	0.749748	0.680664	0.700751	0.692609	0.707553	0.80933	0.83982	0.787356	1.56874	1.60943	1.47511	1.75924	1.69924	1.57314	1.46008	1.55193	1.41026	1.30243	1.27169	1.22535	0.902885	0.906575	0.870732
AKT1S1	54	1.22789	1.27216	1.06783	1.06127	1.09868	1.00391	1.03824	1.06049	1.13312	0.959766	1.02218	1.05249	1.04692	1.01615	1.00473	0.893691	0.967208	1.0034	0.934867	0.914	0.855879	0.975159	0.927985	0.956302	1.014	1.04441	0.949076	1.02243	1.04661	1.2318	1.41518	1.29753	1.42577	1.09727	1.09371	1.10292	1.07536	1.0841	1.10449	0.994374	1.15411	1.20746	0.838574	0.980969	0.854435	1.14814	1.20144	1.20782
AKT2	54	0.860057	0.845013	0.88147	0.820133	0.920404	0.875053	0.855306	0.880578	0.849261	0.99439	1.02819	0.966116	0.991768	0.967745	1.02463	1.33693	1.31144	1.32686	0.819773	0.797908	0.831224	0.855948	0.900383	0.814314	1.04891	1.05918	0.978057	1.05412	1.09692	1.12947	0.84933	0.848047	0.934524	1.20227	1.08581	1.10257	1.25525	1.16895	1.19222	1.10893	1.10825	1.10251	0.665066	0.577881	0.554585	1.38965	1.44009	1.29204
AKT3	54	1.28554	1.36973	1.42945	1.37086	1.22046	1.40135	0.604809	0.562826	0.665825	1.76356	1.74744	1.54199	0.495213	0.486992	0.63956	0.662122	0.639165	0.58431	3.16519	2.96322	2.14136	0.852241	0.898262	0.96339	0.454243	0.445082	0.534848	0.660857	0.58166	0.619208	0.450623	0.492294	0.622804	0.36507	0.455234	0.536418	0.397399	0.392709	0.424488	0.524559	0.469285	0.625674	2.07083	1.89775	2.09798	0.483084	0.413309	0.500989
AKTIP	54	1.12013	1.01121	1.11431	0.687861	0.693947	0.755015	1.03084	1.10956	1.14157	0.975732	0.941777	0.960035	0.910693	0.96351	0.980004	1.13722	1.14754	1.29647	0.692739	0.700045	0.715109	1.3243	1.30582	1.32479	1.23463	1.35481	1.2875	1.19885	1.27753	1.25756	1.00981	1.12971	1.15431	0.914608	1.08535	0.966391	0.916891	1.03466	0.971368	0.90711	0.948079	1.0284	0.641399	0.503984	0.553156	1.51816	1.62298	1.33168
ALAD	54	1.01157	1.05811	0.983126	0.744934	0.837966	0.791556	0.859109	0.840143	0.837847	0.823344	0.876783	0.867402	0.676847	0.633059	0.791147	0.887839	0.853317	0.8493	0.910188	0.946726	1.03354	0.859773	0.893917	0.858138	0.745965	0.77214	0.782015	0.805062	0.865328	0.892191	1.0148	0.991961	1.02358	1.0173	1.01244	0.975925	1.26665	1.18549	1.26316	1.16463	1.14413	1.05692	0.871055	0.876023	0.785655	2.04156	2.01497	1.83484
ALAS1	54	1.59091	1.57678	1.50677	2.35518	1.91666	1.85591	0.8413	0.774224	0.756487	0.784323	0.706082	0.797804	0.948957	0.894363	0.962951	1.78803	1.92603	1.79936	0.94485	0.908254	0.991818	1.38724	1.36288	1.37029	0.834635	0.795324	0.82679	1.13389	1.11167	1.08219	0.644732	0.685467	0.753892	1.00231	0.938369	0.888851	0.783477	0.785931	0.754251	0.720147	0.728838	0.804723	1.12816	1.04958	1.04704	0.833521	0.779387	0.883334
ALAS2	9			0.591712						1.03205			0.896162						1.13449												0.91986												1.00034			0.829647
ALB	54	5.82956	6.5384	6.71907	1.48277	1.23283	1.32003	0.62575	0.646004	0.658317	0.747906	0.691325	0.70336	0.671677	0.710652	0.649644	1.74671	2.03127	1.85374	1.48326	1.15189	1.01283	0.521089	0.475463	0.484138	0.878511	0.865931	0.862834	0.67535	0.661724	0.673442	0.678458	0.641176	0.617561	1.08811	1.03593	1.32906	1.58273	1.58406	1.42044	0.728993	0.696305	0.715114	0.773135	0.772323	0.72849	0.436823	0.389107	0.404386
ALCAM	54	0.533822	0.446453	0.50532	2.9405	2.99651	3.00699	1.12135	1.07341	1.09694	1.31479	1.34685	1.27642	1.28948	1.4163	1.27177	2.10985	1.96862	1.9523	0.522297	0.555687	0.535974	0.540647	0.532636	0.537929	1.02947	1.0675	1.07606	0.460762	0.430257	0.481545	1.28443	1.27179	1.28992	0.666913	0.665934	0.658733	0.78003	0.797943	0.734881	0.576006	0.530242	0.54175	1.08189	1.08024	1.10971	0.544316	0.594904	0.560308
ALDH16A1	54	1.52706	1.52429	1.4225	0.730595	0.731068	0.744668	0.857119	0.84005	0.892526	0.992406	1.05961	1.07769	1.04324	1.02014	1.00281	1.62925	1.59916	1.54585	0.670611	0.727159	0.707504	0.986456	0.987185	0.986107	1.08394	1.0848	1.02354	0.845285	0.841925	0.87217	0.934785	0.912392	0.92437	0.927667	0.94497	0.926707	1.21902	1.15583	1.15193	1.1163	1.19653	1.1085	0.880653	0.842878	0.886652	1.19633	1.13203	1.08953
ALDH18A1	54	0.686576	0.671558	0.644556	1.54814	1.43707	1.44882	1.22385	1.23932	1.24295	0.776513	0.709155	0.788459	1.23144	1.29668	1.21001	1.30867	1.30761	1.30788	0.951039	0.958361	0.954351	0.815451	0.799905	0.756768	0.821964	0.843972	0.821497	0.87188	0.887492	0.856307	0.862761	0.894484	0.856426	1.20985	1.22888	1.19978	1.0895	1.07657	1.076	1.13773	1.12307	1.09114	1.04617	1.08773	1.04844	0.807097	0.823384	0.795522
ALDH1A1	54	0.420837	0.355439	0.472747	0.235244	0.228068	0.227644	7.3165	7.84369	6.90351	0.955723	0.921239	1.14668	0.262199	0.247943	0.275069	0.90272	0.822085	0.882828	0.251071	0.304328	0.220221	0.542648	0.442067	0.446318	0.284953	0.276473	0.252397	0.418066	0.313973	0.477002	2.75192	2.58068	2.77597	0.274249	0.21749	0.263304	0.262205	0.201744	0.254383	0.444994	0.337345	0.507527	0.428325	0.323055	0.463526	0.584193	0.541225	0.556221
ALDH1A3	54	1.87703	1.90614	1.76852	0.400113	0.451887	0.449129	0.35603	0.365735	0.360223	1.35742	1.34034	1.30534	0.981952	1.08563	0.955656	0.863323	0.917482	0.874732	0.51792	0.459144	0.527343	1.40464	1.50664	1.49266	3.36203	3.17432	3.2849	2.96719	3.05257	2.92013	0.412612	0.412221	0.40765	0.306535	0.317923	0.288706	0.292227	0.32055	0.291832	0.371861	0.335251	0.396451	0.360014	0.327865	0.375271	0.31019	0.308008	0.308538
ALDH1B1	54	1.44139	1.4807	1.57456	1.41362	1.28023	1.23004	0.918345	0.925931	0.919827	1.28298	1.25667	1.23871	1.03909	1.00203	1.03646	0.575797	0.566828	0.509266	1.38261	1.31634	1.41619	1.24371	1.27238	1.2415	0.923284	0.936499	0.905472	1.43755	1.37525	1.39107	1.44288	1.35345	1.39944	0.914634	0.897564	0.853681	0.855033	0.872216	0.855217	0.909649	0.892449	0.898949	0.842966	0.847853	0.86993	0.722456	0.673288	0.695625
ALDH1L1	54	6.00829	6.27216	6.75353	0.653709	0.572119	0.493785	0.504088	0.522739	0.469804	0.67104	0.795572	0.778388	0.604626	0.818469	0.51715	0.957892	1.25471	0.983744	1.32631	1.53935	1.40214	0.951233	0.978422	1.10012	0.550914	0.372931	0.40726	0.807256	0.847391	0.821819	0.885539	0.920761	0.840302	0.608546	0.41398	0.392966	0.583738	0.312141	0.394644	0.465924	0.573536	0.518327	0.488403	0.512971	0.452264	1.31974	1.25457	1.47703
ALDH1L2	54	0.351012	0.35481	0.344006	1.13004	1.05356	0.935596	0.408452	0.412483	0.412013	0.986561	0.990359	0.9789	2.56239	2.70923	2.67482	0.298033	0.332847	0.304688	1.86409	1.83772	1.90106	1.09501	1.02632	1.06806	0.523443	0.57731	0.493874	0.469748	0.48676	0.456413	2.09395	2.06169	2.32417	0.459544	0.480711	0.409477	0.522647	0.552783	0.410745	0.241047	0.284021	0.243425	1.24187	1.19254	1.18682	0.579241	0.559587	0.527071
ALDH2	54	0.5081	0.403517	0.548647	0.672477	0.47313	0.510742	0.788908	0.750993	0.75387	0.487277	0.332427	0.483355	0.518522	0.448366	0.440849	3.2034	3.61638	3.52541	1.39726	1.31783	1.34996	0.579044	0.419141	0.432344	0.513025	0.363316	0.386743	0.640237	0.565181	0.648068	1.15972	1.051	1.18044	0.747264	0.679775	0.628331	0.530125	0.408072	0.383022	0.392818	0.260323	0.342429	0.842257	0.811351	0.832983	3.91625	4.39402	4.69708
ALDH3A1	45		0.710144	0.576276	1.44182	1.4389	1.29089		0.806163	0.627542		1.01348	0.444327	0.739191	0.723127	1.03026		1.12739	0.500057	0.605928	1.10581	0.676525	4.41964	5.91665	4.2601	0.772293	0.806409	0.900028		0.957855	0.261501	0.735593	0.859266	0.856885	0.683495	0.784453	0.775587	0.873418	0.815544	0.861727		1.04942	0.60303		1.19889	0.291885	0.606571	0.630863	0.697134
ALDH3A2	54	2.09404	2.00959	1.77139	0.843836	0.802854	0.761102	0.675993	0.615188	0.671159	0.880426	0.890377	0.863258	1.28357	1.29481	1.25493	2.04776	2.0107	1.9521	0.701072	0.709795	0.604095	1.3878	1.39079	1.36623	1.27158	1.32718	1.29112	0.746527	0.686589	0.733486	0.93659	0.934872	0.919575	0.982275	0.978047	0.937395	0.70937	0.718242	0.667248	0.898442	0.874762	0.928706	0.790132	0.74286	0.798591	0.92349	0.998063	0.957065
ALDH3B1	54	0.543572	0.644948	0.577086	0.650535	0.634198	0.611244	0.681882	0.866921	0.770925	0.892334	0.898783	0.73503	0.563409	0.668293	0.669604	0.456798	0.495432	0.465845	0.883152	0.913508	0.888925	1.97363	2.39112	2.20623	0.969431	0.776386	0.834531	1.57605	1.70165	1.50102	0.72937	0.73259	0.732406	0.414614	0.493189	0.486591	0.810117	0.748205	0.789444	0.735599	0.64943	0.651614	1.45267	1.63927	1.4127	0.663395	0.804139	0.754007
ALDH4A1	54	1.00963	0.937657	0.984422	0.628516	0.669678	0.568638	0.566845	0.49919	0.577978	0.706174	0.6741	0.750324	0.838151	0.864429	0.811067	2.68637	2.90577	2.74791	0.726793	0.806341	0.682213	0.884126	0.877591	0.838922	0.722521	0.781716	0.723544	0.661217	0.56316	0.680598	1.16796	1.15781	1.21557	0.988141	0.979266	0.956498	1.19852	1.20924	1.21949	1.01039	1.01111	0.996821	0.732765	0.692559	0.747346	2.17691	2.009	2.21309
ALDH5A1	54	0.868412	0.855898	0.853047	0.532724	0.531296	0.541289	1.15466	1.1265	1.16808	0.68166	0.680731	0.714815	1.32568	1.29412	1.26272	0.968666	0.990661	0.960374	0.835083	0.795207	0.784222	1.02107	1.00408	1.02922	0.891927	0.955941	0.880065	0.699372	0.664509	0.685725	1.20853	1.15638	1.17413	1.15808	1.12839	1.14646	2.04302	2.03609	1.97987	2.02433	2.05589	1.88255	0.709412	0.691424	0.734032	0.537382	0.582917	0.540805
ALDH6A1	54	0.486285	0.42398	0.463937	0.540454	0.544976	0.56647	0.738564	0.775684	0.737236	0.709694	0.713967	0.711363	1.11004	1.13005	1.10834	1.33396	1.27533	1.3265	0.663516	0.668495	0.620249	0.794816	0.78289	0.768458	0.596489	0.645811	0.60884	0.537334	0.524526	0.534366	1.16189	1.12777	1.16096	1.55078	1.48736	1.40087	1.65159	1.60395	1.4489	1.43034	1.41581	1.42163	0.946064	0.945807	0.939123	1.22439	1.17524	1.11972
ALDH7A1	54	0.364911	0.332237	0.396461	0.9586	0.941372	0.919179	1.03754	1.08852	1.06917	0.774014	0.762993	0.812465	1.45532	1.4734	1.40731	0.601507	0.567725	0.598165	1.46252	1.44932	1.43361	1.26251	1.24341	1.25952	0.987647	0.967069	0.997467	1.41758	1.47733	1.46889	0.874025	0.869705	0.899907	0.894412	0.879047	0.885712	0.771556	0.786274	0.760419	0.877769	0.864058	0.88339	1.12485	1.17941	1.14532	0.808995	0.814119	0.794677
ALDH9A1	54	1.05786	1.16357	1.13572	0.781119	0.73908	0.766524	0.744405	0.756659	0.731902	1.04507	1.01876	0.985368	0.865891	0.86316	0.893134	0.993308	1.02944	0.989458	1.4014	1.33939	1.31818	1.21428	1.23934	1.27676	1.02761	0.969406	1.01887	0.96612	0.943287	0.977053	0.916438	0.886259	0.906247	1.17885	1.18425	1.14703	0.872962	0.842588	0.880591	0.786227	0.766321	0.778227	0.860798	0.818035	0.858921	1.01187	0.997735	0.970949
ALDOA	54	0.810781	0.773079	0.778442	0.818803	0.857105	0.848475	0.81228	0.824619	0.784971	0.824911	0.843464	0.837794	0.653873	0.644363	0.683268	1.72335	1.5823	1.62212	0.771625	0.7928	0.786765	1.08355	1.06343	1.10308	0.908209	0.909593	0.904296	0.855873	0.845239	0.860172	1.14184	1.15361	1.15316	1.44464	1.44231	1.41818	1.71697	1.66867	1.74137	1.30006	1.29449	1.24252	0.791119	0.761412	0.766932	1.31581	1.32395	1.34834
ALDOC	54	0.565955	0.648655	0.637915	0.986788	0.913122	0.979477	0.682751	0.628272	0.67416	1.13294	1.14149	1.13385	0.640616	0.535454	0.638844	0.800821	0.951101	0.918564	2.19192	1.77735	1.49733	0.877032	0.770708	0.933517	0.790969	0.742477	0.743267	0.61772	0.660174	0.646777	0.860063	0.704601	0.814298	1.51323	1.45624	1.43816	1.08495	0.956225	1.21775	1.28929	1.28894	1.29574	0.706974	0.687968	0.68328	1.41208	1.2236	1.31328
ALG1	54	0.823634	0.771374	0.839065	1.12979	1.19587	1.24614	0.846882	0.709588	0.83183	0.712309	0.748708	0.749783	0.79805	0.911515	0.830618	0.956712	0.974113	1.10074	0.907175	0.997754	0.902794	1.00366	1.10944	1.0622	0.859883	0.955723	0.893071	0.989392	1.09689	1.15986	1.32775	1.29672	1.1411	1.09161	0.991334	1.02081	0.867762	0.86537	0.828011	0.924969	0.896111	0.923903	1.37061	1.46137	1.44581	1.51017	1.26992	1.20168
ALG11	54	1.65686	1.61587	1.64684	1.22688	1.11331	1.09002	1.2328	1.17362	1.20449	0.984066	0.916698	0.993915	1.25241	1.18982	1.28448	0.97385	0.979499	0.925004	0.938563	0.865855	0.923174	0.648826	0.727406	0.573347	0.986169	0.953103	0.862119	1.13657	1.09252	1.20233	0.972931	1.11265	0.932843	0.704805	0.789729	0.718135	0.7007	0.764616	0.728768	0.731381	0.73684	0.818397	0.665585	0.645864	0.699141	1.05785	1.19647	1.28269
ALG12	54	0.649172	0.672784	0.60155	1.081	0.907952	0.657212	0.806318	0.90381	0.771671	0.927402	0.978955	0.854524	0.9527	0.992226	0.868073	1.69366	1.11524	1.30224	1.66662	1.60951	2.11513	1.15799	0.895478	1.00994	0.739439	0.604349	0.701431	0.853538	0.962864	0.904041	1.69312	1.59605	2.05629	0.660925	0.795751	0.933452	0.73444	0.86703	0.856733	0.722343	0.777776	0.742006	0.64767	0.55351	0.752829	0.840213	1.10051	1.14558
ALG13	54	1.0843	1.08043	1.07289	0.927451	0.954981	0.869933	0.996968	0.903974	1.04185	0.715468	0.576685	0.659013	0.663396	0.768356	0.722	1.07113	0.955816	1.08065	0.871334	0.821094	0.859926	0.772239	0.758252	0.779788	0.969571	0.838385	0.866166	0.913376	0.910197	0.929511	0.88378	0.910463	0.909641	1.8136	1.61726	1.3348	1.80097	1.57748	1.16433	1.47747	1.63399	1.45349	1.04633	0.977741	1.11733	1.19091	1.07169	1.02604
ALG14	54	0.80296	0.900069	0.796385	1.26832	1.09687	1.16966	0.907492	0.942085	0.857495	0.637442	0.899089	0.802069	1.05238	1.08592	0.956629	1.15393	1.20764	1.25579	0.967169	1.05625	0.961732	1.18964	0.980279	1.03183	0.987781	0.841476	0.997337	1.18454	1.38103	1.40263	1.07292	1.05381	1.06613	0.990536	1.01923	1.01936	0.8065	0.738383	0.828602	0.835473	0.806185	0.636537	0.993266	1.18585	1.23222	1.41827	1.48175	1.29003
ALG2	54	1.36478	1.34386	1.27985	1.10002	1.09271	1.0649	0.779674	0.733438	0.746686	0.727104	0.779697	0.709085	1.11917	1.07349	1.17367	0.913111	0.962599	0.868185	0.734186	0.790438	0.698224	1.08686	1.20867	1.13466	0.991668	0.920373	0.987894	0.938118	0.940508	0.986149	0.896989	0.748059	0.90574	0.841499	0.793769	0.847982	0.879377	0.974805	0.989476	0.952957	0.98657	0.900802	1.53674	1.51191	1.34801	0.894244	0.882417	0.885722
ALG3	54	1.0621	0.870904	0.950943	1.41131	1.19033	1.19662	1.55051	1.23544	1.40903	0.684501	0.706498	0.726787	0.654803	0.680376	0.612636	1.22143	1.04345	1.19354	1.62062	1.80805	1.42813	1.27402	1.04219	1.18947	0.664749	0.755816	0.821074	0.518547	0.62796	0.551661	1.59122	1.65143	1.44709	0.901356	0.840487	0.861423	0.755017	0.793431	0.800738	0.859938	1.026	0.998399	0.829245	0.721378	0.71606	1.59965	1.23395	1.47215
ALG5	54	0.964219	0.885798	0.940106	1.80332	1.54758	1.538	0.787131	0.781999	0.790439	0.715433	0.693505	0.718791	0.979658	1.07025	1.00751	1.028	0.929233	0.928968	0.854369	0.827818	0.839725	1.1383	1.16641	1.15686	0.914977	0.963464	0.9692	0.964249	0.989391	0.99283	0.922276	0.887847	0.835604	1.11265	1.22826	1.16109	0.969055	1.05164	1.03091	0.978176	0.989663	1.08323	0.709737	0.637422	0.673318	1.21014	1.27007	1.2166
ALG6	54	0.754894	0.74787	0.823369	1.32645	1.23912	1.08929	1.1877	1.23759	1.16277	0.851908	0.852528	0.804975	1.56116	1.70898	1.50682	1.00072	0.992489	1.02273	0.829369	0.736099	0.733854	0.830909	0.727962	0.785316	0.850758	0.775767	0.815772	0.806994	0.709382	0.709502	1.54129	1.45827	1.52126	0.999692	0.931863	1.03763	1.04355	1.02828	1.10034	1.14948	1.10199	1.03819	0.884985	0.852391	0.960153	1.28713	1.29844	1.23973
ALG8	54	0.810366	0.765411	0.855696	1.39537	1.41276	1.22881	0.99159	0.967236	1.05011	0.795102	0.728539	0.841782	1.20642	1.13644	1.23707	0.830138	0.833892	0.937086	1.14231	1.08079	1.14644	0.826705	0.984925	0.872281	1.00568	0.988418	1.10523	0.801081	0.69039	0.824331	1.06728	1.08726	1.28476	0.892418	0.891872	0.829332	0.982406	1.11681	0.968843	1.41103	1.27171	1.4345	1.00552	1.17956	1.04188	0.88804	1.12267	1.12618
ALKBH1	54	0.867265	0.97604	1.03909	0.975308	1.10146	1.04356	1.24685	1.50416	1.25933	0.800578	0.877307	0.836779	0.950744	0.924464	0.940627	1.00663	0.863586	1.18677	0.875043	0.96713	0.798067	1.12706	1.16232	1.08663	1.01267	0.974779	0.979766	0.947855	1.03213	0.996081	0.914197	0.914666	0.761192	1.40051	1.61859	1.60732	1.13952	1.17619	1.258	1.15881	1.09859	1.15521	1.2284	1.24675	1.24374	1.11059	1.04302	0.986104
ALKBH2	54	0.769715	0.655797	0.705318	1.04021	0.87185	1.00177	1.67069	1.77375	1.71046	1.08283	1.11881	1.18177	0.585818	0.716435	0.694137	0.880827	0.561881	0.68762	1.74346	1.3085	1.42863	0.799934	0.960607	0.837995	0.794317	0.844527	0.83917	1.02222	1.10814	1.03237	0.75687	0.810937	0.825807	1.70801	1.79351	1.57199	0.816869	0.960278	0.900343	1.02103	1.0717	0.916855	0.927745	0.811557	0.941007	0.993642	0.841103	1.03757
ALKBH3	54	1.13625	1.12831	1.16686	0.889189	0.853996	0.957392	0.467246	0.494841	0.774663	0.869352	0.980857	0.950553	1.38928	1.61313	1.33358	1.10864	1.15888	1.07812	0.709735	0.457714	0.441897	1.03841	1.07426	1.16512	1.01796	1.05755	0.95806	0.829286	1.07467	0.933808	0.967913	0.511396	0.665922	0.887725	0.898336	0.906613	0.886475	0.711662	0.929812	0.86206	0.762531	0.83301	1.3907	1.21635	1.23636	1.03365	1.05042	1.14224
ALKBH4	54	0.750886	0.789024	0.799781	1.03213	0.961273	0.887605	0.977036	1.03267	1.01529	0.817665	0.82508	0.835653	1.14865	1.39035	1.19718	0.963235	1.11011	0.960974	1.01617	1.09892	0.959436	0.853331	0.797126	0.762843	0.805974	0.896466	0.875269	0.827921	0.750985	0.806035	1.05286	1.06667	0.931003	1.40674	1.433	1.42274	1.22229	1.33632	1.28363	1.13417	1.14524	1.0769	1.12168	1.12598	1.10473	1.06349	1.21999	1.10828
ALKBH5	54	0.929582	0.947081	0.952721	1.09736	1.0778	1.0594	0.956915	0.923826	0.953496	0.980871	0.957959	0.888555	1.09955	1.01924	1.02516	1.64543	1.81606	1.60289	1.01882	1.02632	1.12397	0.948969	0.899498	0.865451	0.949676	0.96163	1.00917	0.746832	0.71315	0.773639	0.862455	0.795905	0.920234	1.14336	1.10375	1.24945	1.1434	1.07486	1.21742	1.26827	1.2888	1.26773	0.997301	1.01119	1.12634	1.06835	1.01559	1.06392
ALKBH6	54	0.936961	1.15361	1.09816	0.675751	0.71425	0.672438	1.02865	0.947253	0.866338	1.31079	1.48932	1.62241	0.926631	0.817899	0.932398	0.999982	1.08367	1.12572	0.721519	0.560729	0.71756	0.704583	1.01252	0.800634	0.993295	0.858708	1.05772	0.94472	0.990782	1.09052	0.878195	0.831631	0.93802	1.29515	1.12015	1.20383	1.01686	0.869995	0.952745	0.866295	0.818585	0.969643	1.27127	1.54846	1.29212	1.10361	1.00701	1.08075
ALKBH7	54	0.889306	0.82434	0.95446	1.01563	0.949264	0.977522	1.15482	1.23082	1.27167	0.72749	0.850688	0.799586	1.00913	1.07974	1.0342	1.26976	1.45419	1.65503	1.11337	0.949368	1.08276	1.26341	1.15721	1.31253	0.794805	0.900147	0.787986	0.729506	0.894719	0.896423	0.581616	0.787693	0.734037	0.871551	1.01386	1.01376	0.609119	0.810924	0.782925	0.831536	0.912777	0.751371	1.65562	2.02864	2.21809	0.700875	0.902033	0.795423
ALKBH8	54	1.11377	1.18513	1.20968	0.900439	1.11685	0.88176	1.16036	1.17345	1.24423	1.03389	0.948618	1.04413	1.00312	1.20045	1.10629	1.04247	0.895066	0.954395	1.09145	1.18487	0.988528	0.912141	0.965937	1.01618	0.962308	1.06081	0.938271	1.3168	1.43194	1.36405	0.836789	0.938453	0.913964	0.936934	1.01044	0.910992	0.720766	0.859317	0.711858	0.832227	0.730753	0.849728	0.916683	0.697003	0.759954	0.790263	0.854469	0.827817
ALMS1	54	1.24184	1.17711	1.17122	0.772377	0.804527	0.739558	0.975027	1.03226	0.967593	1.30233	1.25421	1.22972	0.89831	0.808975	0.923472	0.851608	0.825152	0.828367	0.885108	0.852194	0.862609	1.35033	1.36361	1.30805	0.883357	0.930084	0.873722	1.05319	1.06114	1.08453	0.888722	0.919299	0.908114	1.15912	1.15855	1.11036	1.10464	1.15094	1.1419	1.13405	1.1539	1.16458	1.09088	1.12729	1.08085	0.64284	0.644012	0.663161
ALOX15	36			2.68273	0.429417	0.506287	0.931095			0.609632			1.05054	0.766851	0.757004	1.10998			0.487699	0.606875	0.562204	0.776896	0.285726	0.546683	0.753296	2.12234	1.5997	0.983805			0.530112	0.597012	0.633779	0.928046	2.98202	2.03914	1.30379	1.32427	1.16162	0.904583			2.18456			0.61536	0.599236	0.586844	0.693552
ALOX5	45		3.18322	2.98497	0.389502	0.764346	0.584538		0.0752244	0.220933		0.120458	0.256682	1.62466	2.22777	2.8123		0.335427	0.309161	0.556856	0.758173	0.437551	2.19759	2.95915	3.99867	0.920638	0.989432	0.899365		0.0574066	0.220089	1.08175	1.47959	1.61307	0.624107	0.531195	0.48111	0.871238	0.883451	0.916836		0.226424	0.292007		0.0646945	0.179217	0.513638	0.473859	0.319464
ALOXE3	9	1.37121						0.249128			0.287356						0.646699												0.789734												0.951392			0.737884
ALPK1	54	0.825338	0.914145	0.771355	0.767544	0.777324	0.778473	0.728865	0.697399	0.690772	1.02711	0.932437	0.935817	1.11027	1.10491	0.803007	0.722963	1.05777	0.716349	1.7202	1.38943	1.53497	1.17283	1.15359	1.15026	0.885672	1.02926	0.911052	0.933735	0.783806	0.818501	1.31489	1.30313	1.23979	0.757395	0.981041	0.832753	1.03004	1.1061	0.87059	0.871319	1.14239	1.07597	1.11215	1.0304	0.988661	1.08476	1.30091	1.05155
ALPK2	9					2.28442									1.12335						0.863977			0.665409			0.71397						1.02362			0.891567			1.09033									0.59772
ALPK3	27				0.671779	1.30904	0.923619							3.76286	4.80829	3.32631				0.687953	0.725444	1.2463	1.12262	0.777599	1.08752	1.05406	0.742785	0.706261				0.909657	0.467658	1.15591	0.791302	0.487827	0.59184	0.814803	0.406681	0.67073							1.31525	0.721009	0.945907
ALPL	54	0.562904	0.350852	0.319615	0.588693	0.399243	0.710966	2.03644	2.45939	2.50341	2.72273	2.93805	2.75157	0.698005	0.671305	0.642051	0.652728	0.479027	0.272987	0.626869	0.746507	0.608556	1.13608	0.970977	1.00308	0.648834	0.414031	0.72104	0.574774	0.484816	0.404213	3.90914	4.34382	4.79258	0.607757	0.48788	0.508139	0.664608	0.523441	0.627833	0.413708	0.343741	0.346592	0.446887	0.470249	0.36989	0.720468	0.446652	0.662283
ALPP	54	5.48322	6.00656	6.91611	0.354115	0.364628	0.346519	0.584096	0.586361	0.54775	0.926613	0.857145	0.822876	0.43625	0.398412	0.499712	0.897898	1.23383	0.879015	0.302794	0.475552	0.254256	2.05644	1.93765	2.33392	0.620774	0.722423	0.570164	0.668984	0.583916	0.515255	0.451995	0.513675	0.47137	0.296283	0.391279	0.244059	0.271763	0.384601	0.283845	0.580724	0.525161	0.514867	0.623627	0.533007	0.447815	0.503086	0.521917	0.491698
ALPPL2	18					0.742955	1.15122								0.641915	0.937671					1.02022	0.968749		3.79746	3.8598		0.814458	0.645858					1.00672	0.934595		0.662272	0.44052		0.702629	0.581196								0.863951	0.585281
ALS2	54	1.26311	1.21193	1.20072	1.18761	1.35613	1.28731	1.20336	1.23254	1.24635	1.29168	1.28642	1.27128	0.873787	0.802888	0.871946	1.11632	1.16959	1.13933	0.709596	0.815635	0.733439	0.943867	1.00854	0.981247	0.636468	0.636754	0.677938	1.33972	1.36702	1.40689	0.770592	0.736526	0.722275	0.990517	1.01516	1.07106	0.883188	0.895376	0.872672	0.867911	0.828533	0.846671	1.17329	1.08066	1.11623	0.905608	0.957985	0.959
ALS2CL	45		1.20562	1.03281	0.676228	0.689966	0.855928		1.08431	1.05703		1.41885	1.28611	0.824447	0.836409	1.04776		0.673541	0.914476	0.889959	0.949738	0.827792	1.26734	2.91575	2.71083	1.18916	1.26557	1.4835		0.871166	0.842878	0.951463	1.16325	1.0178	0.741497	0.651188	0.761206	0.810144	0.650378	0.822456		0.891604	0.720706		0.597813	0.704934	1.10224	1.43587	1.32745
ALX1	9			1.15717						0.873712			0.964897						0.996032												0.950432												0.906163			3.08645
ALX4	45	0.831873	0.929171	0.800106	0.5476	0.774222		0.774837	0.563373	0.578824	0.756406	0.656915	0.602448	3.19678	3.51743		0.700994	0.776809	0.722602	0.827898	0.680189		0.80794	0.69917		0.534505	0.740173		0.976854	1.07579	1.18575	1.54225	1.85246		0.507888	0.706243		0.485984	0.58729		0.559631	0.423245	0.503071	1.36095	1.34098	1.52562	0.606944	0.695535
ALYREF	54	0.943325	0.95435	0.928795	0.829444	0.819204	0.780644	1.0858	1.09241	1.08176	1.00815	1.07391	1.03797	0.94861	0.889052	0.931692	0.913289	0.925304	0.912642	0.966316	0.929554	0.950612	0.942813	0.946293	0.911466	0.95798	0.934329	0.981684	1.01956	1.01317	1.04075	0.852795	0.825271	0.848434	1.18994	1.1747	1.21416	1.11526	1.12308	1.13091	1.05914	1.07597	1.04815	1.22374	1.21775	1.22436	0.94633	0.93491	0.940304
AMACR	54	1.09048	0.918064	1.05499	0.566968	0.593924	0.551576	0.561205	0.446619	0.584501	0.573296	0.554501	0.457465	0.643124	0.581644	0.603032	4.61204	5.1939	4.2933	0.849442	0.792499	0.765944	1.17455	1.24516	1.15476	0.629878	0.611208	0.669584	0.635885	0.506244	0.550386	1.72209	1.75121	1.81272	0.546045	0.563183	0.470121	0.675961	0.733845	0.664284	0.708711	0.62824	0.722909	0.928235	1.06241	0.975743	1.14406	1.11536	1.13868
AMBP	9	2.60391						0.966168			0.765642						1.35806												0.974997												1.14141			1.03274
AMBRA1	54	0.740765	0.628503	0.651408	1.0091	0.954943	0.946858	0.962393	1.05443	0.994015	0.774543	0.731494	0.766778	1.27172	1.27236	1.19248	0.803755	0.725908	0.815816	1.077	0.984043	1.01825	1.03793	1.00983	1.00333	0.856237	0.726453	0.859948	1.27619	1.14831	1.24834	0.910367	0.889721	0.887923	1.06386	1.16954	1.22687	0.877968	0.818164	0.909947	0.99822	0.939535	1.00066	0.871126	0.841603	0.784393	1.075	1.034	1.04333
AMD1	54	0.696996	0.8035	0.802828	1.09052	1.21277	1.25384	1.67936	1.81632	1.76818	0.723804	0.869955	0.905517	1.40774	1.34777	1.51336	0.539271	0.452998	0.499473	1.44902	1.47087	1.42716	0.900641	0.867804	0.856136	1.07161	1.10974	1.15991	1.09418	1.09658	1.01119	0.648829	0.580244	0.699661	0.979794	0.780922	0.841004	0.54391	0.587773	0.58767	0.740492	0.770437	0.673056	0.859271	0.849638	0.836663	0.709096	0.57812	0.768745
AMDHD1	9				1.07503									0.827931						0.939851			2.04501			0.901216						0.849315			0.93097			0.749267									0.570185
AMDHD2	54	0.854734	0.879459	0.857374	1.04334	1.19537	1.04414	0.907417	0.750655	0.979183	0.487764	0.771243	0.784633	0.596923	0.632472	0.585447	2.26122	1.97611	2.01881	0.743163	0.795221	0.786724	0.918769	0.977093	1.002	0.797477	0.766507	0.793574	0.732097	0.69933	0.906188	0.931649	0.905202	0.98048	0.886587	0.856439	0.928738	0.809272	0.79269	0.831373	0.878126	0.847595	0.891697	1.12842	1.07996	1.22567	1.32142	1.47254	1.54086
AMER1	45		0.811885	0.890521	0.743717	1.06827	0.842656		1.34705	1.17581		0.715281	0.905489	3.01165	2.95208	3.79742		0.687772	0.637276	0.88286	1.15416	1.05484	1.08287	1.20778	1.27031	0.812731	0.892419	0.792287		0.766027	0.911685	0.626244	0.67535	0.580206	0.770676	0.909778	0.750445	0.564407	0.737425	0.467764		0.651843	0.776059		0.926926	0.948402	0.722298	0.87459	0.548993
AMFR	54	0.976655	0.919137	0.981842	1.05336	0.984361	1.0947	1.0309	1.03047	1.00078	1.04569	1.01769	1.00711	1.02721	0.927283	0.942941	1.12537	1.36427	1.12653	0.957074	0.959676	1.00624	1.11336	1.07017	1.18125	1.34242	1.4208	1.48027	1.16556	1.27163	1.23637	1.40146	1.34593	1.4522	0.929997	1.00409	0.950365	0.922696	0.975445	0.990438	1.14925	1.17688	1.09891	0.882227	0.924482	0.905316	0.761177	0.853394	0.803015
AMH	9				1.15688									1.21298						1.09368			0.776561			0.886171						0.954077			0.902167			1.35387									0.837757
AMIGO1	36	1.16504	1.13255	1.22197			1.53755	1.00878	0.953559	1.13452	0.55099	0.63066	0.506535			0.510023	0.777319	0.526938	0.776723			1.66459			1.01814			0.841085	0.782644	0.845083	0.939585			0.765626			1.18307			1.34428	1.42519	1.36907	1.24677	1.41285	1.11524	1.3165			1.45034
AMIGO2	54	0.755299	0.595674	0.751706	1.87118	1.31413	1.83359	1.07295	1.15201	1.05646	0.715381	0.532149	0.642797	0.554987	0.596488	0.563042	0.709364	0.725779	0.727866	0.312493	0.421423	0.397749	0.776164	0.937769	0.739948	0.712371	0.59134	0.668878	1.05806	1.0041	1.07903	0.526089	0.566342	0.566715	0.509288	0.478716	0.440033	1.67623	1.35618	1.4253	3.12627	3.02671	3.49803	1.0786	1.00103	1.01777	0.704043	0.721367	0.697095
AMIGO3	22		0.696469	NA	NA				0.315868	0.944024		0.475616	0.507184	2.75678				NA	NA	0.290304			0.88797			NA				0.578202	0.437458	1.4221			0.256571			1.6992				6.51801	4.1929		0.730191	0.704836	0.945479
AMMECR1	54	1.12797	1.14772	1.14724	1.51993	1.49248	1.59863	1.26268	1.14185	0.827255	1.08312	0.871791	0.611519	0.731773	0.883435	1.0913	0.918692	0.933781	0.911269	0.592309	1.06034	0.826795	0.993137	1.3556	1.07319	0.918864	1.05984	1.03202	1.04891	1.22428	1.12738	0.880943	0.92655	1.0333	0.847034	1.04058	1.03654	1.19368	1.15067	1.09758	0.998564	1.25349	1.00864	0.88072	0.631544	0.847879	1.29169	1.00165	1.06402
AMMECR1L	54	1.23662	1.27928	1.22824	1.06504	0.927879	1.01938	1.22547	1.44094	1.32886	0.869188	0.896747	0.889261	1.11486	1.26139	1.41046	0.781395	0.788857	0.702733	1.11068	1.0398	1.0685	1.02998	1.00494	1.21434	1.27472	1.33131	1.28999	0.981006	0.981818	1.035	0.66273	0.763652	0.894978	0.969591	0.956767	1.0325	0.790846	0.881472	0.877771	0.833345	0.882667	0.886944	1.02098	1.00188	0.892065	0.888246	0.974585	0.962932
AMN1	45	0.94666	0.747583	1.21412	0.490933	0.67414		1.41048	1.42132	1.17053	0.889249	1.07451	1.05165	0.667068	0.59076		1.33375	1.12178	1.10034	1.48618	0.89055		0.764213	1.00772		0.730078	0.680812		0.958353	0.966851	1.02954	0.599581	0.938531		1.15926	0.943719		1.26318	0.938878		0.956649	0.937116	1.02424	0.925332	0.904674	1.06292	0.726395	0.729745
AMOT	54	0.943094	0.938588	1.39839	0.755976	0.703994	0.762452	0.842805	0.744824	0.958672	1.24635	1.34626	1.40657	1.70341	1.80048	1.33071	0.950678	1.3012	0.947443	1.34299	1.22071	1.50283	0.827814	0.835146	0.898828	1.11416	1.22766	1.11291	0.766556	0.725411	0.962213	1.8109	2.08525	1.48118	0.869537	0.9659	0.937524	0.876292	0.924219	0.874035	0.97201	0.726388	0.824876	1.17501	0.833277	1.19378	0.636498	0.711128	0.623595
AMOTL1	54	1.44416	1.49825	1.51907	1.05956	1.06794	1.00804	0.677096	0.699991	0.570177	0.700512	0.733394	0.65231	1.67294	1.75839	1.58339	0.929779	0.908207	0.820152	0.79562	0.826092	0.8307	1.74243	1.64476	1.7206	1.96127	2.0539	1.97494	0.843217	0.777723	0.719411	0.83575	0.852856	0.831634	0.967264	0.913178	0.857444	0.855224	0.664291	0.647355	0.662543	0.770872	0.591417	0.854787	0.855479	0.768159	1.5678	1.53803	1.51007
AMOTL2	54	1.17572	1.26888	1.11794	1.2058	1.14607	1.19835	1.05103	1.1838	1.10277	0.884657	0.895064	0.853335	0.874726	0.890537	0.846408	0.774374	0.770898	0.784901	1.68208	1.40326	1.53324	0.996155	1.00746	1.02069	1.17979	1.09847	1.24964	1.31255	1.4598	1.3317	0.847988	0.923334	0.898517	0.64906	0.688115	0.669984	0.73304	0.769343	0.775647	0.766659	0.78808	0.772697	0.992685	1.02112	1.0077	0.885217	0.874843	0.905893
AMPD2	54	2.15133	2.3906	2.13175	1.23163	1.15777	1.22624	1.00769	0.93664	0.989362	0.835754	0.804745	0.868302	0.49966	0.560436	0.525064	0.721485	0.799773	0.745424	1.09163	0.993837	1.02743	0.91223	0.852867	0.883112	0.863715	0.859343	0.815851	1.34025	1.40022	1.36737	1.26182	1.25584	1.33059	1.05514	0.989301	1.0444	0.900436	0.852547	0.894516	0.744463	0.743966	0.735183	1.44148	1.42824	1.36439	0.973175	0.955803	0.96262
AMPD3	54	1.54783	1.20174	1.79979	0.961081	0.836839	0.898096	0.980911	0.759882	0.672207	1.19099	0.921627	1.20342	1.0751	0.947734	0.969139	1.50763	1.20827	1.44825	0.858977	1.14109	0.65706	1.38956	1.8246	1.78668	1.20678	1.1102	1.13474	1.14701	1.18845	1.1874	1.2192	1.1599	0.967163	0.876727	0.630278	0.633258	0.933432	1.02426	0.843365	0.730204	0.891662	0.816998	0.563565	0.595584	0.657302	1.04273	0.693691	0.585782
AMPH	27	0.802389	0.716086	0.575507				0.750386	0.571075	0.780825	0.852425	0.770489	0.657986				0.722054	0.650106	0.633033										0.711164	0.615287	0.687319										0.788897	0.710929	0.611098	5.7629	6.27418	6.26195
AMZ1	36	0.445492	0.939922	0.48808	0.820418			0.391375	1.03936	0.505504	0.521828	1.16891	0.707419	0.811643			0.924826	0.726278	0.786535	0.888908			1.06183			0.593676			0.443799	1.07501	0.844163	0.733373			0.873131			1.31012			1.06881	1.02946	1.54177	0.294064	1.16679	0.857608	0.80658
AMZ2	54	0.839568	0.737485	0.851948	0.762855	0.855374	0.778318	0.920731	0.998229	1.09807	0.964866	1.02354	0.964265	0.720659	0.72204	0.715175	0.866894	0.880752	0.707721	1.04034	1.0809	0.97429	1.44995	1.33608	1.10398	1.04412	1.02332	0.937778	0.728849	0.725804	0.853401	0.881194	0.905778	1.00058	1.21498	1.10695	1.17774	1.32265	1.43899	1.21506	1.21916	1.3239	1.30276	1.19704	1.3966	1.13803	0.892712	0.908235	0.843965
ANAPC1	54	0.973148	0.938777	0.981342	0.911872	0.929669	0.8873	1.30042	1.33913	1.38391	0.956887	0.90594	0.879374	1.06398	1.06449	1.03027	0.852936	0.857239	0.864789	0.892808	0.945971	0.894706	1.06156	1.05394	1.04465	0.928029	0.961279	0.954677	1.01025	0.985782	0.999674	0.949867	0.921492	0.896607	1.13203	1.15502	1.1479	1.04873	0.994644	0.998148	1.0709	1.06931	1.07976	0.904149	0.8594	0.864383	0.900526	0.896973	0.893307
ANAPC10	54	1.28828	1.32923	1.19104	0.973797	0.964638	0.992597	1.47569	1.66343	1.39713	1.21702	1.11769	1.03636	0.933275	0.969006	0.941088	0.820991	0.781588	0.791116	1.16519	0.987878	1.07309	1.11726	1.03619	1.04963	1.07881	0.975958	0.975108	1.21081	1.18072	1.22289	0.884362	1.13447	0.904752	1.06482	0.935391	0.981851	1.00412	0.849302	0.929198	0.932364	1.02498	0.902493	0.927474	1.06469	0.991778	0.853968	0.663778	0.696217
ANAPC11	54	1.65899	1.60753	1.631	1.3546	1.27266	1.13994	2.64011	2.84935	2.88528	1.77431	1.69149	1.62806	1.70851	1.68113	1.97298	1.65187	1.48187	1.42977	1.2585	1.10883	1.34952	0.87366	0.903156	0.77823	1.18503	0.936083	1.24073	1.20539	0.995239	1.12867	1.39323	1.53396	1.55391	1.17573	1.04885	1.08781	1.72699	1.92313	2.0326	1.78038	2.00116	1.86982	1.89235	1.63507	1.78997	1.20491	1.27424	1.18147
ANAPC13	54	0.913679	1.11163	0.949527	1.03035	1.20536	1.18658	1.71858	1.39707	1.56183	1.22375	1.17109	1.04732	0.948954	0.897917	0.976069	0.934329	0.958701	0.988801	0.680894	0.689802	0.844038	1.17858	0.994797	1.08757	0.886364	0.774404	0.944011	1.0486	1.12674	1.05577	0.752942	0.753332	0.863754	1.11826	1.19239	1.38651	1.16853	1.13521	1.05146	1.3837	1.22931	1.13791	0.973193	0.929703	0.924245	0.967628	0.781102	0.81421
ANAPC15	18	1.17271			1.06505			1.61684			0.713215			1.10052			0.816713			0.876808			1.22659			1.27471			1.01535			1.00962			1.46423			1.07085			1.30807			1.19847			0.942384
ANAPC16	54	0.696161	0.759568	0.860407	0.780665	0.98709	1.14648	1.27024	1.30765	1.44319	1.19519	1.10588	1.12076	1.06055	1.02671	0.952583	0.805021	0.625571	0.770169	0.839471	1.00366	1.01205	0.843505	0.957347	0.930887	0.956607	1.05893	0.959531	0.89558	0.952976	0.971692	0.857579	0.92166	0.897291	1.16395	1.09741	1.04131	1.13133	1.03845	1.04594	0.952571	0.895312	1.04262	0.898954	0.786638	0.811889	0.728611	0.692391	0.68507
ANAPC2	54	1.01823	1.03004	1.03349	0.941622	0.926595	0.913201	1.31171	1.38164	1.2374	0.940879	0.931682	0.924273	1.1475	1.09406	1.12668	0.970334	0.956061	0.93898	0.833467	0.807309	0.809105	1.02977	1.01375	1.0042	0.982088	1.01856	0.965798	0.974448	1.02226	0.989072	0.964993	0.979203	0.942052	1.15068	1.1916	1.19514	1.11234	1.19348	1.12509	1.13714	1.22019	1.13805	0.93571	0.971873	0.969471	0.836614	0.886879	0.893005
ANAPC4	54	0.968276	1.00833	0.965705	0.945933	1.04018	1.02769	1.29508	1.20183	1.19262	0.934872	0.81079	0.85965	1.10101	1.03406	1.0673	0.888197	0.826263	0.818438	0.77866	0.883929	0.793826	0.974824	1.04886	1.04137	0.891107	0.831009	0.950165	0.92606	0.8606	0.955741	0.919269	0.903157	0.977564	1.137	1.13254	1.14982	1.00237	1.02985	0.975613	1.09195	1.03518	0.994069	0.968656	0.879547	0.882664	0.740328	0.80146	0.784362
ANAPC5	54	0.923418	0.931471	0.997446	0.909021	0.953679	0.901387	1.29306	1.28104	1.32904	1.05729	0.985491	0.99879	1.07833	1.06618	1.04133	0.892458	0.71874	0.937123	0.901211	0.906532	0.853284	1.01788	1.0495	1.01514	0.902363	0.924549	0.899526	0.955517	0.956579	1.01525	0.977862	0.891773	0.884679	1.18957	1.18214	1.13574	1.14169	1.10737	1.0449	1.11005	1.11714	1.13167	0.927813	0.933194	0.897484	0.879673	0.836723	0.862082
ANAPC7	54	0.95399	1.04041	1.01282	0.997828	0.972399	1.02876	1.34796	1.41055	1.26435	1.1427	1.16582	1.15864	0.7922	0.870626	0.877378	0.800757	0.744894	0.816556	0.973419	0.917184	0.974462	0.944733	0.928977	0.890496	0.962667	0.967041	0.905827	1.15619	1.14461	1.12554	0.813086	0.827685	0.821808	1.28327	1.31743	1.25673	0.976479	1.04536	1.01553	1.07186	1.04165	1.10847	0.799173	0.789129	0.785758	0.804893	0.795277	0.789074
ANG	9					1.16098									0.554465						1.97747			0.756188			0.899923						1.04475			0.69917			1.1508									0.915069
ANGEL1	54	0.642846	0.613506	0.692163	1.27785	0.938056	0.957461	1.00153	1.09711	1.03233	0.741871	0.812817	0.781997	0.773158	0.75094	0.716519	1.18826	1.0418	1.15737	1.11494	1.16102	1.00251	1.02552	1.02455	0.978111	0.891876	0.856504	0.835937	1.45952	1.58181	1.46134	0.919788	0.891756	0.889583	0.962106	1.09956	1.20749	1.32115	1.37762	1.45103	1.3115	1.2098	1.38011	0.879263	0.862301	0.880154	0.853406	0.827281	0.855544
ANGEL2	54	0.864383	0.922919	0.93903	1.01253	1.04067	1.06371	1.11217	0.921083	1.0597	1.39088	1.55874	1.39654	1.23183	1.32096	1.13253	0.814807	0.930112	0.89169	1.46309	1.34193	1.42173	0.771408	0.783269	0.840407	0.867371	0.910263	0.808675	0.992635	1.0636	0.9973	0.938651	0.950385	0.904628	1.00441	1.01276	0.81028	0.717847	0.772645	0.708754	0.604376	0.644677	0.696201	1.12316	1.15204	1.19905	1.35798	1.5367	1.1272
ANGPTL4	18	0.610462			2.73515			0.711925			0.798506			0.44154			0.770012			1.1701			0.770232			0.493918			2.31458			0.53511			0.675172			0.487496			0.560197			0.7684			1.63836
ANK1	54	0.570694	0.556958	0.592991	3.05752	3.15514	2.94643	3.31606	4.07099	3.57762	1.23402	1.24568	1.3503	0.585909	0.508906	0.600114	0.64805	0.6568	0.640003	0.547874	0.422408	0.579432	0.718961	0.664161	0.688026	0.474036	0.415466	0.437762	0.717404	0.653435	0.673793	0.573517	0.400043	0.492981	0.502605	0.37527	0.446504	0.577649	0.495316	0.574305	0.831524	0.791151	0.838561	1.4945	1.65978	1.66076	0.462104	0.373657	0.428496
ANK2	45	0.846818	0.711142	0.699943		0.52522	0.619725	1.03817	1.21901	1.19634	1.01789	1.03426	0.873709		0.591922	0.909349	0.774915	1.46871	0.867563		4.03134	1.3451		0.913283	0.812333		0.658082	0.782504	1.111	1.2398	0.999155		1.00014	1.01811		0.92925	1.07606		0.949078	1.15694	0.784183	1.29207	0.660349	1.3519	0.765561	1.99644		0.935235	1.49002
ANK3	54	0.697823	0.651015	0.700175	0.597186	0.534702	0.55058	0.657388	0.603723	0.589851	0.702639	0.622303	0.693049	1.06197	1.02754	1.00901	1.67029	1.61714	1.554	1.64799	1.57024	1.4995	0.776133	0.770674	0.771766	0.825045	0.809099	0.819408	1.31785	1.23764	1.25978	1.04386	1.0649	1.07545	1.22034	1.24824	1.2184	1.38121	1.36822	1.42078	1.22367	1.26481	1.22438	0.536934	0.466799	0.54639	1.14931	1.06426	1.15414
ANKEF1	36	1.44874		1.3012		0.81097	0.820337	0.788327		0.864711	1.09161		0.933103		0.963997	0.980372	0.767938		0.698832		1.16587	1.15064		0.835768	1.1956		1.0252	1.02276	0.96047		0.903979		0.737162	0.730014		1.19713	1.19722		1.34361	1.39245	1.47195		1.4156	1.0825		1.12024		0.867027	0.863988
ANKFY1	54	1.36618	1.42282	1.40991	1.29819	1.32747	1.37228	1.08607	1.07777	1.12594	0.854092	0.797623	0.845534	0.893479	0.955523	0.94013	1.08352	1.1418	1.0935	0.786582	0.825065	0.745529	0.937906	1.00989	0.961088	0.875676	0.826352	0.842466	0.949978	0.914504	0.950161	0.627668	0.6693	0.597943	0.968755	0.972913	0.921614	0.908528	0.917105	0.871692	0.93553	0.88416	0.909815	0.983364	0.963745	0.990715	1.0291	0.970012	0.961165
ANKH	54	1.00522	0.949694	1.13923	1.23423	1.46304	1.39096	0.437078	0.555922	0.672857	1.2554	1.23778	1.32243	2.84931	2.63499	3.5112	0.371922	0.64409	0.549034	0.942738	0.946025	1.14637	0.700479	0.687869	0.622899	0.744407	0.806514	0.587717	1.30095	1.24081	1.3493	0.663022	0.597864	0.618893	0.614702	0.771185	0.67829	0.651676	0.760636	0.472795	0.335862	0.401009	0.699763	1.01317	0.892461	0.974584	0.731131	0.735257	0.565737
ANKHD1	54	0.832574	1.05669	0.899041	1.14388	1.38157	1.02346	1.09152	1.28428	1.16964	0.747244	0.714448	0.766036	1.17089	0.959356	0.876207	0.727993	0.67451	0.659097	0.982639	1.01213	1.08467	1.11148	1.22907	1.14927	0.961153	1.08671	0.992781	1.0457	1.1773	1.16017	0.467897	0.783273	0.866981	1.07101	1.36805	1.19868	1.12973	1.36838	1.29644	1.23696	1.57109	1.26292	1.213	1.26993	1.26014	1.17838	0.558746	0.853493
ANKIB1	54	0.983722	0.915582	1.0048	0.984798	1.05274	1.05118	0.977899	0.955399	0.991381	0.800887	0.815147	0.732534	1.14616	1.15109	1.11968	1.21717	1.1614	1.28086	0.899789	0.858054	0.865789	1.04	0.885038	0.829459	0.933884	0.853872	0.78635	1.08265	1.04041	1.06079	0.959862	0.896025	0.918482	1.05419	1.06494	1.02319	1.07191	1.16987	1.10453	1.18161	1.09661	1.15399	1.07171	1.05282	1.08526	1.24335	1.19853	1.09387
ANKLE2	54	1.18251	1.19321	1.17753	1.01695	1.01727	0.974567	0.909234	0.929225	0.916425	1.1084	1.18584	1.14904	1.12282	1.07561	1.03872	1.05649	1.00888	1.03875	1.05749	1.05474	1.01227	1.04663	0.986007	1.00153	0.954301	0.944223	0.932653	1.011	0.996391	1.03824	0.841033	0.824787	0.826519	0.992786	1.0181	0.977437	0.983543	1.03631	0.998252	1.05366	1.09898	1.09729	1.18208	1.26654	1.28634	0.897736	0.906447	0.921575
ANKMY2	54	0.751098	0.71667	0.80227	1.00661	1.01458	1.01057	2.15207	2.14501	2.01517	0.573436	0.555785	0.678647	0.924341	0.92391	0.868918	1.32731	1.25622	1.28776	1.06297	1.11053	1.17685	0.974472	0.835934	0.901894	0.677745	0.686628	0.684369	0.629126	0.567439	0.677743	1.29724	1.27945	1.37285	0.686535	0.733722	0.745862	1.32736	1.39033	1.44838	1.39016	1.31434	1.26562	1.64742	1.6331	1.61029	0.82268	0.845302	0.856384
ANKRA2	27	0.71458			0.733451		1.27388	0.833138			0.844397			1.50708		0.929672	1.72436			0.652142		0.898417	0.765934		1.26403	0.927612		1.29144	0.579337			1.10995		1.03897	1.06669		1.10123	0.787696		1.19593	0.980684			0.838239			1.42334		0.78813
ANKRD10	54	0.835262	0.598647	1.02003	1.12472	1.48565	1.2925	0.792319	0.882609	1.02962	1.11364	0.85791	1.06034	1.47558	2.25107	1.50804	0.805194	1.21682	1.01438	0.642546	0.452698	0.870159	0.835389	0.832203	0.934938	1.35007	2.1764	1.40163	1.11024	0.72124	0.870602	0.960279	1.18331	1.13944	0.800818	0.875858	0.950491	0.725301	0.701262	0.746806	0.581097	0.655936	0.59554	1.50927	1.139	1.13061	0.812299	0.761071	0.68624
ANKRD11	54	1.01267	1.00473	1.00422	1.01245	0.989112	1.03009	1.31769	1.41233	1.33104	1.11442	1.10569	1.10706	1.08702	1.09732	1.06403	0.727206	0.751051	0.694468	1.09501	1.09263	1.10974	1.06918	1.06424	1.00808	1.16359	1.12408	1.10525	0.974849	1.01253	0.980426	1.02832	1.0322	1.07793	1.20043	1.18262	1.19118	1.1451	1.16547	1.10801	1.12452	1.22997	1.26512	0.830855	0.736997	0.742815	0.646761	0.73069	0.710182
ANKRD12	54	0.868713	0.841768	0.878495	0.98123	0.965607	0.919516	0.802102	0.761569	0.834659	1.60119	1.57049	1.46417	1.63791	1.60658	1.63239	0.986454	1.00754	0.968962	1.00968	0.990655	0.962692	0.775446	0.813185	0.836632	0.91357	0.984452	0.877407	1.02779	0.981298	1.04354	0.965201	0.932862	0.972044	1.03698	1.07631	1.11744	0.784061	0.917802	0.886077	0.849975	0.854799	0.852029	1.27546	1.33404	1.25328	0.828523	0.863705	0.786434
ANKRD13A	54	2.7497	3.12618	2.68343	0.771896	0.786865	0.707036	0.728694	0.648833	0.717783	0.928058	0.797195	0.868034	1.1327	1.09317	1.13252	1.01165	1.07708	1.03511	0.751476	0.756512	0.637771	1.34795	1.36845	1.3989	0.92268	0.91959	0.933799	1.29172	1.29492	1.2904	1.14723	1.16493	1.15302	0.761467	0.787324	0.700383	0.72151	0.764175	0.686893	0.746794	0.703415	0.730137	1.0818	1.16337	1.04919	0.998197	1.03845	1.06568
ANKRD13C	54	1.089	0.946418	1.13439	1.03108	1.1039	1.09528	1.25714	1.25855	1.15783	0.991395	0.938057	0.874057	0.961954	1.00886	0.887267	1.27342	1.33474	1.24744	0.803161	0.943638	0.8119	1.02127	0.976216	1.10718	1.19094	1.15246	1.23483	1.17387	1.0829	0.94216	0.916569	0.972977	1.0577	0.859445	0.898809	0.843598	0.840654	0.797777	0.923687	0.759475	0.90321	0.800834	1.12354	1.09025	0.83254	0.902688	0.916138	0.908758
ANKRD13D	54	0.902503	0.992464	0.972398	0.90304	0.966908	0.896542	0.656286	0.812882	0.735325	0.85487	0.981521	0.854982	1.29482	1.15808	1.28193	1.41996	1.47566	1.39143	0.931688	0.930741	0.767526	0.778567	0.844173	0.95847	0.954011	0.86137	0.889293	0.931094	1.09769	0.942097	0.824903	0.994449	0.739643	0.823275	0.892256	0.953782	1.03415	1.06907	1.12091	1.12424	1.21108	1.05964	1.13047	0.983263	0.963553	1.06002	0.964505	1.06598
ANKRD16	54	0.849852	0.863857	0.86005	0.834735	0.817758	0.818648	0.90206	0.857991	0.828743	0.952268	0.805033	0.931884	1.11083	1.23699	1.18132	0.91441	0.85267	0.933899	0.795718	0.958105	0.995327	0.731453	0.887863	0.768558	0.834576	0.841142	0.861211	0.956154	0.942017	0.873815	0.850582	1.01573	0.946557	1.21637	1.1814	1.24566	1.14757	1.42356	1.28858	1.03471	1.05028	1.00727	1.56577	1.71664	1.4958	0.780536	1.01321	0.946364
ANKRD17	54	1.04358	1.02828	1.0517	0.981751	1.06255	1.07765	1.14206	1.19566	1.18076	0.880899	0.854812	0.905667	1.07282	1.06128	1.04657	1.12431	1.07963	1.09762	1.0843	1.05467	1.06873	0.891251	0.848767	0.888682	1.25513	1.25887	1.31668	1.02094	1.06997	1.02387	0.890027	0.868612	0.90817	1.09881	1.14377	1.1257	0.8447	0.793936	0.818639	0.858941	0.862007	0.847416	0.974486	0.951278	0.983258	1.11008	1.06473	1.10664
ANKRD2	54	4.64963	4.60901	5.25084	0.462301	0.603841	0.593159	0.62957	0.635291	0.553025	0.767929	0.707124	0.6343	0.851127	0.837764	0.804073	0.898042	1.08227	0.749105	0.615168	0.786387	0.503466	2.51146	2.59072	2.80215	1.03245	0.932171	0.902467	0.828005	0.907648	0.979725	0.570315	0.833546	0.472652	0.535544	0.566789	0.574934	0.557361	0.618884	0.642147	0.629345	0.547608	0.518886	0.620101	0.542401	0.678394	1.0093	1.071	0.897845
ANKRD22	54	0.340848	0.348503	0.494089	0.545901	0.456197	0.492732	0.394062	0.310148	0.450791	0.701209	0.756278	0.785177	1.18054	1.22024	1.10926	1.532	1.62611	1.4795	0.596432	0.567325	0.492534	1.69003	1.70563	1.5091	1.47001	1.61284	1.49247	1.15115	1.22138	1.087	1.50488	1.5957	1.45493	0.687962	0.70605	0.766999	0.625093	0.531382	0.701313	0.543784	0.489087	0.593813	0.660755	0.61857	0.730926	0.748615	0.702495	0.827439
ANKRD26	54	0.959585	0.940272	1.00026	1.18295	1.07797	1.11016	1.24302	1.1877	1.22304	1.01497	1.01107	1.02323	1.01334	0.914114	0.943148	0.79317	0.745897	0.749571	0.788257	0.675312	0.677622	1.52949	1.42575	1.5582	0.965487	0.937656	0.954906	1.15158	1.26713	1.13675	1.198	1.26941	1.28459	0.888578	0.798406	0.850856	1.01211	0.912545	0.975908	0.968741	0.979246	0.975473	1.0588	0.994631	0.977127	0.613105	0.516212	0.627181
ANKRD27	54	1.08252	1.1406	1.15521	0.829843	0.875318	0.819521	0.812073	0.819365	0.781391	1.1033	1.17707	1.13158	1.32481	1.35719	1.31503	1.1918	1.24403	1.23337	0.833564	0.819844	0.843878	0.960061	0.933113	0.929835	1.12857	1.21019	1.18705	1.01807	1.03859	1.04111	0.969365	1.01642	1.02371	1.05536	1.14208	1.14081	1.05153	1.08965	1.11221	1.06711	1.02379	1.03734	1.27416	1.29929	1.25612	0.861729	0.888384	0.882598
ANKRD28	54	1.19945	1.2023	1.24101	1.03889	1.05794	1.03863	1.04924	1.03974	1.09953	1.37809	1.39334	1.38682	0.898102	0.945107	0.970875	0.85426	0.898246	0.866127	0.71259	0.761794	0.670532	1.22248	1.20808	1.31957	0.931867	0.918786	0.949867	1.08163	1.07395	1.1022	1.2376	1.24735	1.30529	1.03048	1.01046	1.00633	1.02494	1.08168	1.09995	1.03346	1.06399	1.03842	0.904834	0.895068	0.903736	0.830312	0.808242	0.810066
ANKRD32	54	0.825733	0.596174	0.690607	0.757562	0.90255	0.794132	1.2486	1.08379	1.1376	1.52017	0.957565	1.01803	1.12319	1.25043	1.24274	0.700846	0.744705	0.694479	0.879626	0.966469	0.899884	1.26203	1.3191	1.45178	1.00097	1.10783	0.918799	0.89154	0.957572	0.990358	0.806727	0.838312	0.884183	1.83711	1.56504	1.32095	1.33878	1.2463	1.32888	1.29017	1.24408	1.2706	0.956142	0.985866	0.869017	1.51341	1.26734	1.27037
ANKRD33B	9						2.48248									0.590957						0.576918			2.45023			0.293327						0.596757			0.233277			0.543231									0.2725
ANKRD36C	36		1.10886	1.18374		1.10127	0.858263		0.720231	0.65754		0.685162	0.677727		1.23833	1.05737		0.317221	0.486776		0.837419	1.05452		1.29715	0.885579		2.06195	4.88558		0.696583	0.803695		1.21687	1.43826		1.24541	1.4637		1.16069	1.62227		0.85537	0.800679		0.38729	0.520034		0.821231	0.832538
ANKRD39	54	0.983961	1.10549	0.85057	0.81072	0.823792	0.767934	1.22884	1.22062	1.34392	0.759766	0.955284	0.739178	0.912002	0.755336	0.869643	1.00342	1.02576	0.924917	0.953012	0.960343	0.970007	0.89376	0.846369	0.857258	0.894788	0.961621	0.890723	0.824366	0.84836	0.779131	0.802251	0.826284	0.625998	1.60443	1.68033	1.34975	1.6873	1.5208	1.45392	2.04843	1.82639	2.2738	0.708723	0.781074	0.688	0.891427	0.930361	0.935111
ANKRD40	54	1.06378	1.19263	1.20562	0.615903	0.891545	0.633629	1.18322	1.20182	1.44729	1.33565	1.42676	1.35628	0.442894	0.433589	0.487715	1.0101	0.99751	1.00751	1.0801	1.17502	1.06826	0.661685	0.784197	0.751224	0.917349	1.0217	0.843359	1.03004	1.11203	1.17627	0.406754	0.498926	0.452563	1.27324	1.18903	1.25187	1.13105	0.984386	1.10961	1.11998	1.05669	1.04582	0.908003	0.926191	0.905456	1.05927	1.03363	0.954998
ANKRD44	54	0.941071	1.04164	1.04746	1.00848	1.02458	1.03701	0.56506	0.595382	0.632202	1.14766	1.25561	1.1214	0.527432	0.618833	0.597431	0.987971	0.947243	0.94948	1.15748	1.20948	1.29694	0.880391	0.900742	0.804152	0.71263	0.666611	0.659658	1.11056	1.08678	1.05532	1.44254	1.49427	1.55723	1.01395	0.988017	1.0381	1.19086	1.29414	1.26583	1.23622	1.20256	1.25828	1.62465	1.48905	1.6415	0.865644	0.971492	0.921854
ANKRD46	54	0.627775	0.542023	0.687641	1.01072	1.1202	1.15714	1.88334	1.80592	1.9339	0.867654	0.74379	0.797286	1.07022	0.921361	1.04923	1.9033	1.6259	1.69142	1.13725	1.51076	1.42057	1.06032	0.831115	0.821546	1.09975	1.12998	1.10695	0.767003	0.747814	0.700169	0.947287	0.704689	0.660855	1.19934	1.15351	1.12798	0.852901	0.71092	0.700751	0.850973	0.790615	0.914375	0.771162	0.696676	0.775129	1.06203	0.953222	0.989391
ANKRD49	54	0.92499	1.12519	1.00927	1.0485	0.968495	1.15823	0.936144	0.997723	0.756645	0.834974	0.817756	0.913704	1.24393	0.97706	1.03853	0.929628	0.868583	0.828596	1.21411	0.953675	0.93898	1.00879	0.975062	1.01479	1.74953	1.28211	1.54187	0.772351	0.782078	0.675035	1.08186	0.813645	1.02334	0.884947	0.972746	0.774476	0.979566	0.846932	0.715609	0.82146	0.793179	0.730832	0.670184	0.857271	0.749093	0.930514	1.05265	0.836563
ANKRD50	54	0.753057	0.842715	0.815595	1.14306	1.20786	1.18965	0.880134	0.894114	0.869366	0.662406	0.702572	0.79117	0.819018	0.814984	0.803107	1.19674	1.21677	1.19069	0.923744	0.867964	0.878231	0.903673	0.874451	0.892795	1.02004	1.01751	1.00461	0.874402	0.934885	0.91042	1.02704	1.01895	1.01318	0.955516	0.898275	0.908884	1.87496	1.88304	2.0142	1.62769	1.66158	1.59208	1.29187	1.3397	1.2351	0.706018	0.69612	0.641896
ANKRD52	54	0.906712	0.932297	0.94177	0.731527	0.737884	0.824786	1.28519	1.31357	1.28098	0.877669	0.82793	0.941462	0.659594	0.737887	0.772214	1.04974	1.0376	1.05321	0.761719	0.670026	0.679262	1.06375	0.933267	0.978948	0.849293	0.79233	0.830818	1.04397	0.959097	0.992695	0.73754	0.749968	0.757343	1.32722	1.23027	1.15243	1.28517	1.29685	1.15469	1.37053	1.16132	1.27093	1.41563	1.37254	1.27434	1.18067	1.15857	1.17658
ANKRD54	54	0.980828	0.824186	0.874017	1.00137	1.12598	1.12773	1.20828	1.007	1.21582	1.14441	1.18831	1.22953	1.16205	1.10532	1.18703	1.29995	1.18773	1.16125	1.39158	1.23002	1.50451	0.949133	0.894699	0.956296	0.993256	0.995711	0.975401	0.882526	0.734738	0.861732	1.24157	1.04991	1.30359	0.85936	0.755777	0.776945	0.996053	0.877361	0.863567	0.900615	0.863736	0.889974	1.35567	1.42376	1.3013	0.988354	0.991025	1.07302
ANKRD9	27				0.727771	0.804811	0.681563							1.10641	1.27949	0.794705				0.543938	0.692974	0.574271	1.16056	1.19508	0.979659	0.929484	1.04131	0.855501				0.718232	0.619452	0.777341	1.54879	1.54637	1.21746	1.41402	1.32141	1.16134							1.52488	1.4062	1.64165
ANKS1A	54	1.18938	1.20637	1.14087	0.746733	0.867606	0.774084	0.919614	0.929545	0.904675	0.826894	0.837361	0.842461	1.58689	1.64468	1.82806	1.39052	1.37554	1.38602	0.93707	1.04483	0.870186	1.03733	1.05308	1.09675	0.873195	0.936655	0.842668	0.737752	0.705434	0.705573	0.98567	1.07044	1.01574	1.14135	1.22416	1.23951	0.95564	0.994771	0.955226	1.01206	1.03396	0.994458	0.895059	0.852343	0.868728	0.795958	0.829711	0.834042
ANKS3	54	0.716373	0.569336	0.591564	1.25487	1.41987	1.63733	1.35464	1.44372	1.43305	0.860094	0.619421	0.755867	0.635178	0.741878	0.767034	0.927914	0.813002	0.823169	0.864923	0.938383	1.10192	0.726664	0.902457	0.831202	0.822527	0.855832	0.791233	1.45037	2.34171	2.03659	0.72481	0.727525	0.69044	0.843585	0.831746	0.942971	0.613661	0.721805	0.513043	0.712352	0.549975	0.63399	1.38066	1.82478	1.5842	0.764123	0.684443	0.720519
ANKS6	54	0.752064	0.803991	1.04769	1.113	1.12801	1.05748	1.43689	1.36395	1.36149	0.540399	0.642806	0.987567	0.78927	0.805054	0.741332	1.15283	1.72368	1.15452	1.31833	1.15117	1.36019	1.12654	0.996131	0.94294	0.563951	0.681335	0.461818	0.854579	0.875943	0.870534	1.11819	0.904076	1.05117	0.947784	0.803867	0.894128	0.817526	0.797115	0.748078	0.519461	0.641858	0.879425	1.40593	1.96585	1.00739	1.03055	0.990738	0.984427
ANKZF1	54	1.02057	1.0227	0.995408	0.949804	0.849926	0.904614	0.986437	0.98815	0.929741	0.938551	0.866852	0.864936	1.18247	1.15078	1.05817	1.03165	0.99571	0.965777	1.17317	1.08527	1.19469	0.635535	0.639767	0.619325	1.13288	1.14092	1.19761	0.872388	0.835643	0.865453	0.873347	0.867288	0.860635	1.53237	1.78391	1.82629	1.05763	1.04869	1.04285	1.02553	1.01761	0.994517	0.855674	0.920069	0.910771	1.07901	1.13519	1.11285
ANLN	54	1.71126	1.7874	1.67885	1.36564	1.53039	1.55111	1.07126	1.09228	1.13627	1.45775	1.54454	1.41556	0.785052	0.785228	0.796494	0.67184	0.65238	0.659033	0.827464	0.822709	0.844008	1.60293	1.50886	1.5307	1.50222	1.45972	1.41005	0.981971	0.993211	0.977397	1.21648	1.2066	1.25805	0.670655	0.66159	0.675005	0.646522	0.663859	0.668581	0.662219	0.628771	0.682519	1.4097	1.45735	1.40117	0.886531	0.934277	0.876705
ANO1	54	0.665326	0.544974	0.64027	0.697186	0.661825	0.545879	0.539159	0.403518	0.487142	2.16663	2.6518	2.2081	1.15556	1.33296	1.2297	1.61123	1.76537	1.74965	0.891441	0.687017	0.805967	1.81434	1.83096	2.12132	3.33215	3.29355	4.09349	0.728405	0.692471	0.672271	0.80993	0.722586	0.704003	0.523056	0.625211	0.418228	0.522572	0.600451	0.42503	0.531724	0.392698	0.577173	0.594756	0.455329	0.594482	0.597308	0.538734	0.492556
ANO10	54	1.01272	1.0547	1.0221	1.25543	1.13083	1.20726	0.878475	0.811846	0.818788	0.97527	0.944603	0.951594	0.838067	0.850639	0.844538	1.77866	2.0877	1.88379	0.898637	0.83632	0.941204	0.874459	0.762325	0.807269	1.071	1.02458	1.04302	0.774985	0.722908	0.791708	1.05081	1.01886	1.07528	0.913628	0.87973	0.963898	0.868978	0.868256	0.936648	1.16346	1.17145	1.09894	0.777588	0.804415	0.802053	0.874526	0.817357	0.837145
ANO4	9				1.1115									0.99795						1.17509			0.99181			1.12872						0.895978			1.22394			1.00687									1.08408
ANO6	54	1.52963	1.45838	1.46051	1.02472	1.01536	1.04023	0.643091	0.548956	0.597619	1.43722	1.52022	1.46811	1.34349	1.35025	1.35809	0.678307	0.652001	0.681168	0.87051	0.863535	0.80534	1.1731	1.06268	1.14946	0.817225	0.857662	0.854663	0.86379	0.812688	0.827988	1.10996	1.10244	1.03342	0.739257	0.650813	0.733336	0.941726	0.957871	0.978343	0.932228	0.869296	0.951934	1.54361	1.58847	1.5793	0.480351	0.601289	0.452153
ANO8	54	0.763716	0.798823	0.788958	0.737229	0.912094	0.648336	0.61608	0.646242	0.643419	0.791949	1.10523	0.989175	2.84471	2.04469	2.55977	1.55747	1.53589	1.32302	0.638546	0.749938	0.632881	1.02545	0.871134	0.770818	1.02201	1.12522	0.923781	0.508386	0.658475	0.673885	1.73869	1.33504	1.5784	0.729492	0.86452	0.681408	0.752067	0.866578	0.696591	0.943599	0.799278	0.85972	1.81179	1.94325	1.87012	0.609406	0.730199	0.596512
ANO9	27		1.47704		0.761704		1.22517		1.06798			1.86155		1.09573		1.21298		0.803224		0.989253		1.06854	0.939267		1.07018	1.01513		1.07426		0.975118		1.31794		1.10916	1.22747		0.91766	1.26162		1.12025		1.87206			0.471579		1.18727		1.07673
ANP32A	54	1.27556	1.36503	1.27849	0.818224	0.768986	0.788135	1.15218	1.1529	1.12348	1.00685	0.994503	1.00515	1.20837	1.1446	1.18494	0.94114	0.998046	0.916121	1.41784	1.41564	1.462	1.07041	1.06353	1.08313	1.15323	1.14416	1.19112	0.911532	0.932587	0.873996	1.1228	1.16201	1.19163	1.15148	1.20238	1.26476	1.17134	1.22404	1.27139	1.5325	1.60125	1.47798	0.430319	0.39578	0.422456	0.90821	0.929976	0.953229
ANP32B	54	0.977029	0.923111	0.969002	0.981996	1.07281	1.07002	0.997976	0.973328	0.982425	0.979688	1.00454	0.970562	1.11377	1.11574	1.1447	0.776334	0.769196	0.762298	1.02254	1.04913	1.1401	1.09967	1.09478	1.11097	1.03824	1.03981	1.06226	0.968438	0.987031	0.977211	1.09585	1.08434	1.13601	1.33733	1.41259	1.40651	1.31388	1.39056	1.38962	1.28582	1.30922	1.24772	1.03298	1.0492	1.09936	0.936344	0.917972	1.04186
ANPEP	54	0.339166	0.291173	0.389235	4.83495	4.7982	5.3452	0.371247	0.29181	0.357825	0.451631	0.353698	0.45068	0.563193	0.655244	0.615789	0.450782	0.386885	0.449153	0.570691	0.613031	0.59643	1.43914	1.44287	1.47151	0.481623	0.523491	0.440576	2.32461	2.36336	2.29486	1.2712	1.21651	1.28513	0.475045	0.488659	0.45182	0.488186	0.473029	0.439869	0.327288	0.280805	0.359019	1.15967	1.18042	1.17053	0.47761	0.53652	0.44404
ANTXR1	54	1.1632	1.0784	1.18803	2.2048	2.27966	1.92413	1.08285	1.03232	1.01516	1.43708	1.4361	1.45637	0.800378	0.884907	0.81051	0.691577	0.460409	0.57587	0.693189	0.721878	0.797639	0.961904	0.862258	0.90147	0.746486	0.815359	0.942087	1.16247	1.20026	1.25436	1.11384	1.18089	1.15114	0.797465	0.890249	0.974208	0.635715	0.661916	0.542823	0.774518	0.590418	0.511882	2.2364	2.38494	2.52604	0.423894	0.491523	0.467375
ANTXR2	54	0.533462	0.443256	0.854388	3.7104	3.43313	2.73591	0.712711	0.482858	0.686295	1.02212	1.02641	1.30172	0.728468	0.95988	0.884686	0.626758	0.576079	0.66344	1.23525	1.13676	1.20526	0.842376	0.773468	0.805616	1.07963	1.23614	1.03747	0.899461	0.87119	0.827047	1.18436	1.22565	1.0895	0.602925	0.849015	0.676335	0.654533	0.865176	0.753786	0.379271	0.391187	0.37564	1.25895	1.19877	1.03551	0.483388	0.690285	0.718054
ANXA1	54	0.505849	0.489862	0.516159	1.8216	1.87818	2.06297	0.678345	0.61854	0.625896	1.92145	1.9544	1.88067	0.576778	0.64016	0.657983	0.402012	0.377891	0.425973	0.882314	0.915493	0.881597	2.08924	1.98158	2.19658	1.57508	1.48519	1.57436	1.54602	1.61819	1.58659	2.49048	2.35876	2.558	0.39804	0.429838	0.394378	0.460545	0.474745	0.423208	0.31803	0.313328	0.326184	1.0256	1.03775	1.02164	0.436734	0.46554	0.417378
ANXA10	27				0.803305	0.722718	0.7409							0.855344	0.740776	1.09336				0.567923	0.988167	0.785192	7.25471	4.01071	4.77525	0.84863	0.483286	0.609941				0.567859	0.745549	0.6281	0.39833	0.537463	0.464773	0.479729	0.687752	0.607382							0.540782	0.667482	0.426952
ANXA11	54	0.784948	0.756525	0.788927	1.32016	1.28751	1.2345	1.15164	1.20007	1.21539	1.06923	1.06681	1.10914	1.18967	1.21019	1.1901	0.745216	0.638463	0.662695	0.920978	1.00022	0.980961	1.02458	1.03604	1.02827	0.86487	0.900012	0.894767	1.0656	1.04204	1.07358	1.18862	1.23081	1.16589	0.816348	0.811845	0.829046	0.849668	0.900437	0.870657	0.829768	0.804083	0.802794	0.713682	0.698589	0.747185	1.38843	1.41361	1.4091
ANXA2	54	2.02081	2.13396	2.00984	0.913276	0.915847	0.901788	0.759956	0.725957	0.724325	1.84606	1.93412	1.78253	0.99876	1.01784	0.985229	0.61249	0.648208	0.622225	0.814174	0.8317	0.828274	1.25235	1.23742	1.24854	1.28479	1.28369	1.30202	1.25186	1.28073	1.21745	1.40521	1.37883	1.41782	0.464878	0.485611	0.457453	0.561001	0.587096	0.566629	0.587054	0.562497	0.586007	1.47591	1.51932	1.45592	0.505427	0.529459	0.509173
ANXA3	54	0.994349	0.981686	1.00177	0.357151	0.393459	0.396733	1.24633	1.23398	1.27132	2.56799	2.70959	2.58544	0.879753	0.897995	0.897021	0.547278	0.529844	0.537479	0.491257	0.530885	0.534547	1.51425	1.50678	1.4969	1.49268	1.48345	1.40218	1.10255	1.14648	1.07726	0.95133	0.95281	0.934212	0.426048	0.389249	0.440428	0.647599	0.633925	0.642193	0.647785	0.668509	0.665452	0.535155	0.522206	0.543237	0.535771	0.524085	0.538492
ANXA4	54	0.760464	0.782096	0.740736	0.731823	0.687677	0.720286	2.01433	1.974	1.94165	1.35517	1.45715	1.51388	0.644626	0.658674	0.671933	1.18994	1.19027	1.17862	0.882845	0.8284	0.890282	0.846403	0.836482	0.846707	0.891441	0.895811	0.901375	0.879991	0.916795	0.889043	1.21185	1.17963	1.22159	0.965262	1.00011	0.988271	1.12027	1.14414	1.13177	0.972919	0.966294	0.988334	0.910213	0.93011	0.899883	1.04479	1.04513	1.05441
ANXA5	54	1.30424	1.31681	1.28439	1.70918	1.63199	1.74537	0.8753	0.867076	0.859759	0.962699	0.966309	0.983895	0.66827	0.715838	0.701282	1.02733	1.03554	1.01761	1.36435	1.29751	1.36796	0.820887	0.851423	0.826991	0.829652	0.806062	0.826631	1.12536	1.17727	1.17607	0.871522	0.858923	0.861918	0.794124	0.796927	0.776779	0.771036	0.763325	0.742887	0.731765	0.729817	0.727161	1.5806	1.66642	1.55246	0.811521	0.814937	0.798053
ANXA6	54	0.470533	0.443971	0.507451	0.760907	0.816253	0.767586	0.768087	0.759706	0.801073	0.617172	0.610244	0.669221	1.30432	1.32644	1.32453	1.64129	1.62127	1.64101	1.02699	1.0586	1.0479	0.489665	0.511707	0.449552	0.456959	0.490515	0.413178	0.613986	0.570018	0.625962	0.421156	0.450227	0.391188	1.21868	1.21548	1.22075	0.497905	0.511597	0.433401	0.544708	0.498201	0.567744	1.9852	2.09828	1.93608	2.0519	2.03671	2.15565
ANXA7	54	1.04085	1.07676	1.06718	0.937171	0.961291	0.945897	0.794413	0.819531	0.837172	1.00724	1.05474	1.03895	1.19087	1.21771	1.12512	1.13357	1.22972	1.18117	0.729965	0.77583	0.702516	0.817571	0.844071	0.823767	0.840785	0.879484	0.839664	1.26284	1.33051	1.28605	1.08503	1.11721	1.11037	0.933872	0.995425	0.969198	0.911895	0.974287	0.94288	0.941287	0.975323	0.959432	0.809831	0.837081	0.847859	1.27884	1.26896	1.2831
ANXA9	54	1.39141	1.33631	1.36327	0.438415	0.427329	0.543595	0.650445	0.598601	0.570353	0.547129	0.519522	0.540994	0.509636	0.493863	0.543269	1.02141	1.08023	1.09157	0.541647	0.552317	0.478841	0.771287	0.743895	0.77775	0.637633	0.594231	0.555153	0.835498	0.760749	0.777361	1.70014	1.64466	1.7647	1.08604	1.20506	1.18657	1.62112	1.69971	1.78281	1.89039	1.8651	2.01754	0.688198	0.626715	0.614257	1.15763	1.30276	1.27754
AP1AR	54	0.891951	0.901607	0.947141	1.05594	1.17455	0.940182	0.729996	0.750744	0.816597	0.839105	1.01149	0.975248	1.05805	1.08559	1.06013	1.28378	1.30687	1.38261	1.30408	1.24535	1.29237	1.15388	1.10769	1.15906	0.907023	0.991577	1.00928	0.722638	0.778428	0.91949	1.04794	0.98193	0.99881	1.23782	1.34596	1.33952	1.02008	1.17903	1.00585	0.976244	1.02539	1.01844	0.886127	1.00738	1.03603	1.03248	1.06533	1.1962
AP1B1	54	1.04279	1.07327	1.09364	0.730287	0.783073	0.740248	0.800487	0.773602	0.804811	0.922946	0.904454	0.922653	0.786194	0.851839	0.78744	1.48606	1.58897	1.50668	0.831066	0.932874	0.84412	0.887979	0.889623	0.873347	0.957077	0.908905	0.900489	0.710211	0.678881	0.698981	1.49479	1.49027	1.42892	1.03497	1.06772	0.990444	1.37663	1.38111	1.32916	1.27575	1.32811	1.27083	0.804472	0.788326	0.81683	1.1616	1.19346	1.13648
AP1G1	54	1.29162	1.34845	1.34613	0.697566	0.724177	0.746631	0.860099	0.844509	0.847238	0.836013	0.81134	0.823988	0.807007	0.805213	0.809355	1.39836	1.4784	1.468	0.792291	0.811199	0.792997	0.90992	0.925193	0.936909	0.95291	0.941372	0.967679	0.905581	0.906823	0.945204	1.11299	1.08639	1.13907	1.15304	1.16367	1.1252	1.19584	1.20171	1.17193	1.24618	1.23033	1.22288	0.771789	0.754904	0.803973	0.837369	0.820992	0.845314
AP1G2	54	0.942833	0.905844	0.933757	0.699432	0.601963	0.495057	0.71267	0.73641	0.695426	1.38684	1.40121	1.42097	1.00213	0.912783	0.91501	0.88626	0.855958	0.986397	0.857107	0.814364	0.799963	1.05737	1.04547	1.02956	1.00585	0.988496	1.02774	0.739501	0.662396	0.728547	1.0305	1.00231	1.12288	1.39968	1.33371	1.27867	1.20783	1.24903	1.27678	1.02119	1.03156	1.06977	0.532129	0.49735	0.563815	1.4365	1.44277	1.29802
AP1M1	54	0.906169	0.879639	0.860058	1.04569	1.10368	1.10412	1.17216	1.13339	1.11292	1.03895	1.01532	1.03304	0.99647	0.999795	1.01894	1.20776	1.19564	1.20903	0.800779	0.886175	0.826519	0.81247	0.835661	0.775954	0.970818	0.909127	0.96596	1.09585	1.10184	1.07829	0.896797	0.909197	0.986366	0.954685	0.950529	0.928914	1.08885	1.07104	1.09413	1.03359	1.02171	1.00472	1.0851	1.06009	1.02409	0.840563	0.854371	0.797196
AP1M2	54	1.19595	1.16609	1.1831	0.424977	0.492236	0.500089	0.528015	0.53164	0.546428	0.882518	0.849489	0.816691	0.678865	0.687356	0.730656	1.82157	1.81911	1.75969	0.790146	0.839319	0.788103	1.0798	1.06786	1.07731	0.991372	0.978566	0.964997	0.474159	0.476817	0.460522	1.35972	1.38609	1.39719	1.26734	1.26019	1.23841	1.53963	1.49871	1.43001	1.54034	1.47597	1.53671	0.540221	0.5797	0.537096	1.10496	1.09157	1.06173
AP1S1	54	1.17154	1.52245	1.65349	0.948778	0.795682	0.839941	0.765484	0.763232	0.78283	0.901735	0.892462	0.948645	0.904256	0.882717	0.885268	1.23759	1.64282	1.54282	0.893929	0.869934	0.943224	0.954871	0.808676	0.858675	0.870583	0.872401	0.829126	0.74292	0.629164	0.549433	1.0877	1.12459	1.09893	1.0533	1.09952	1.14274	1.26667	1.33856	1.31052	1.28262	1.6806	1.66284	0.852733	0.691978	0.781576	0.823147	0.972149	0.868227
AP1S2	54	0.880472	0.80973	0.753822	1.08272	0.978383	0.991707	1.10375	1.13429	0.943033	1.15073	1.26129	1.12698	0.819313	0.714744	0.953331	1.12597	1.14198	1.06047	0.852117	0.841863	0.790097	1.1379	1.07605	0.920529	1.04254	1.06549	1.11533	0.906476	0.998172	0.904325	0.893285	0.83167	0.815485	1.21123	1.17269	1.1839	0.858464	0.938018	0.814977	0.846692	0.808524	0.748936	1.01031	1.03562	1.04356	0.64964	0.640306	0.695649
AP1S3	45		0.733218	0.821124	0.684221	0.446551	1.08195		0.464299	0.751963		1.31279	1.19059	0.59215	0.506553	1.06685		1.44406	1.3306	0.901484	0.53193	1.0048	0.972833	1.2894	0.993396	1.38796	1.54697	1.01835		1.71329	1.48905	0.77952	1.04015	1.00455	0.830649	0.676384	0.92927	0.986385	0.660357	1.04692		1.24032	1.05252		0.506462	0.839322	0.862845	0.821453	1.13004
AP2A1	54	1.11386	1.09797	1.10373	0.963825	0.965948	0.982247	0.779627	0.767173	0.785148	1.15163	1.16336	1.11955	0.956096	0.954381	0.957734	1.03555	1.02682	1.05052	0.801763	0.776446	0.80754	0.986237	0.986371	0.979165	1.14672	1.14248	1.1859	0.899671	0.905993	0.899412	1.27669	1.27015	1.26549	0.904536	0.91339	0.877834	1.17323	1.22451	1.13911	1.14053	1.12754	1.11923	0.912691	0.917181	0.908933	1.28278	1.27194	1.28086
AP2A2	54	1.61589	1.76387	1.67044	1.04937	1.07049	1.02214	1.24834	1.27948	1.26406	1.00845	1.06582	1.07126	0.9035	0.935081	0.862081	1.26032	1.32617	1.20155	1.09577	1.03064	1.04582	0.815248	0.80781	0.809919	1.04714	1.01664	1.00116	0.795148	0.777918	0.81426	0.776097	0.807703	0.803904	0.793758	0.811948	0.753085	0.921776	0.93551	0.878736	0.907735	0.946171	0.932978	1.39822	1.42921	1.40544	1.20376	1.15682	1.10047
AP2B1	54	1.18999	1.04663	1.06932	0.940293	1.08677	1.06805	0.99424	0.984067	0.993545	1.27132	1.19343	1.1897	0.946105	0.958194	0.953808	1.02241	0.974251	1.03468	0.883608	0.898489	0.847049	0.9793	0.941394	0.984388	1.19185	1.17358	1.12843	1.07924	1.0303	1.03299	0.691762	0.706375	0.68162	0.974287	0.984766	0.920591	1.03333	1.02462	0.972921	1.05472	1.02306	1.06332	1.19283	1.19223	1.20963	0.868261	0.882889	0.836691
AP2M1	54	1.28909	1.33663	1.2997	0.996255	1.03722	1.00878	0.859385	0.859736	0.861176	1.16047	1.14835	1.17823	0.935008	0.967483	0.9218	1.02849	1.07107	1.03854	0.902869	0.906908	0.859164	1.01426	0.983294	0.976767	1.12559	1.07575	1.11947	0.874555	0.865248	0.868123	1.18827	1.16596	1.14264	0.877243	0.885026	0.855891	1.08954	1.07806	1.02333	1.07698	1.08328	1.02384	1.07662	1.07237	1.0586	1.15649	1.1197	1.09221
AP2S1	54	1.16969	1.39072	1.42621	1.06119	0.995572	0.967896	0.936541	0.942889	0.902442	1.00726	1.09181	1.03155	0.92171	0.907617	0.857161	0.971672	1.10429	1.07889	0.927687	0.886517	0.855649	0.953658	0.951082	0.957473	1.09799	1.07238	1.06696	0.809421	0.834854	0.81612	1.06341	1.00695	1.01342	0.934148	0.903947	0.814011	1.02037	0.980624	0.914269	0.953607	0.844056	0.954693	0.90545	0.952435	0.989567	1.05186	1.00241	0.969876
AP3B1	54	1.11771	1.10515	1.10262	0.985262	1.02992	1.0295	1.05223	1.0563	1.07693	0.949048	0.9618	0.982886	0.890755	0.88004	0.898739	1.60323	1.50633	1.51824	1.10301	1.05342	1.13789	0.837827	0.841996	0.838194	1.0411	1.00038	1.0098	1.0028	0.99778	1.01318	0.988664	0.951548	1.00553	0.913885	0.905244	0.914593	1.03543	1.01055	1.02436	1.05765	1.03984	1.05914	0.95777	0.929137	0.905115	1.09738	1.14974	1.07287
AP3B2	54	1.37481	1.04371	1.56745	0.636488	0.703903	0.611118	0.523365	0.696973	0.527913	0.908116	1.21936	1.05372	1.96752	1.97642	2.18683	0.882039	1.11421	0.89284	2.15837	2.18617	2.33098	1.00284	0.791668	0.791043	0.477312	0.642854	0.685031	1.11493	1.01362	1.15958	0.661104	0.687184	0.680608	0.57195	0.605093	0.589555	0.588139	0.758494	0.642417	0.693525	0.78983	0.664599	0.77326	0.946214	0.934331	0.615024	0.636821	0.853017
AP3D1	54	1.08256	1.09285	1.09618	0.992075	1.00935	1.0001	1.14932	1.15217	1.16959	0.969482	0.956303	0.985113	0.925314	0.880072	0.884192	1.53027	1.63112	1.58266	1.18627	1.19785	1.19768	0.832514	0.789984	0.812633	1.1431	1.12211	1.12728	1.01128	0.992989	1.03297	0.946137	0.945384	0.924883	0.857845	0.787436	0.837234	0.986239	0.9679	0.983091	1.01629	0.984666	1.01673	0.936401	0.942142	0.952281	1.03033	1.02436	1.037
AP3M1	54	0.937267	1.07714	1.0128	0.945873	0.990401	0.970674	1.02469	0.979479	0.96743	0.904867	0.875724	0.895317	0.916009	0.906683	0.925757	1.27839	1.36124	1.27506	0.904378	0.912115	0.857478	0.721864	0.720045	0.652538	0.832322	0.729268	0.80538	0.891374	0.935709	0.933419	0.974363	0.967111	0.946772	0.919832	0.886779	0.784961	1.03979	0.987921	0.92091	0.945873	1.00593	0.911849	0.799229	0.836239	0.852169	1.14417	1.16671	1.03023
AP3M2	54	1.04319	1.12881	1.14847	1.06367	0.948277	1.02063	1.11451	1.04487	1.05226	0.952034	0.892467	0.910889	0.585718	0.613565	0.560702	1.84286	2.07854	1.97272	1.90166	1.93446	2.15466	0.973926	0.909092	0.848982	1.76588	1.93378	2.0032	1.20901	1.03735	1.14096	0.645542	0.497722	0.459066	0.874135	0.805922	0.824253	0.963099	0.786771	0.832047	0.780552	0.776391	0.753142	1.03806	1.03375	1.11289	0.598811	0.414423	0.370409
AP3S1	54	0.86439	0.812136	0.896325	1.07514	1.20522	1.1756	1.14766	1.30762	1.4268	0.88078	1.02036	1.16842	0.928291	0.952364	0.968035	1.22726	1.39897	1.35135	1.22126	1.21591	1.29076	0.918172	1.04564	0.83112	1.16655	1.113	1.10633	0.99672	0.942666	1.05912	1.08412	1.01565	1.06249	0.908069	0.805455	0.890117	1.02095	1.10981	1.02826	1.03727	0.991006	1.08156	0.884514	0.82836	1.04169	0.892877	0.823096	0.871833
AP3S2	54	1.53626	1.69177	1.73075	0.575913	0.529966	0.600949	1.1108	0.763909	0.83188	1.18401	1.07092	1.10191	0.687685	0.524881	0.776719	1.56534	2.18683	2.05221	0.761654	0.885797	0.792681	0.829481	0.869713	0.930308	0.826501	0.682137	0.904858	0.780529	0.73249	0.802006	0.587074	0.550761	0.616201	0.799511	0.825987	0.702586	0.946316	0.955814	0.837141	0.99699	0.838911	1.04611	0.933275	0.925874	0.969891	1.51377	1.62757	1.42439
AP4B1	54	1.096	1.13417	1.10512	0.959819	0.914084	0.972595	0.809406	0.866387	0.892072	0.874395	0.868942	0.753719	0.720403	0.73209	0.753198	0.819297	0.908425	0.922911	0.855664	0.822813	0.814009	0.904383	0.842845	0.829426	1.07236	1.00778	0.994953	0.86701	0.86391	0.829221	1.07818	1.02038	0.994259	1.45824	1.2409	1.26429	1.35131	1.35073	1.33873	1.33571	1.65823	1.53096	0.974466	1.07532	1.03531	1.10757	1.06181	1.00692
AP4E1	54	1.12187	1.12656	1.12735	0.884995	0.903065	0.91736	0.882908	0.843793	0.876376	0.83979	0.774262	0.804132	0.808985	0.762669	0.770169	0.880689	0.912796	0.897442	0.82898	0.796509	0.783674	0.925582	0.854217	0.929747	1.11743	1.12159	1.12915	0.840283	0.823303	0.762969	1.00202	0.970748	1.02869	1.28867	1.31989	1.3158	1.30474	1.30465	1.32908	1.37891	1.51881	1.5274	1.03858	1.06006	0.9973	1.0258	0.960262	0.975142
AP4M1	54	1.09964	0.882269	1.11852	0.866732	1.02562	0.887061	0.962158	0.848091	0.899751	0.888759	0.812042	0.714111	0.911937	1.03989	0.826903	0.943222	0.874764	0.76459	0.924286	0.731219	0.831097	0.84285	0.715936	0.822334	0.957258	1.032	0.896547	0.827159	0.731522	0.765078	1.10005	1.13429	1.02559	1.21507	1.33104	1.27136	1.25599	1.27021	1.40196	1.24393	1.44507	1.44316	1.09439	0.930434	0.932302	1.06982	1.10359	1.0819
AP4S1	54	0.856498	0.831285	0.873186	0.739417	0.736928	0.791673	0.930764	0.955456	0.924272	0.794173	0.829687	0.83237	0.842903	0.7355	0.86354	0.683415	0.776654	0.758191	0.742591	0.59487	0.743577	0.862433	0.886523	0.873669	1.18145	1.17921	1.18768	1.11326	1.12211	1.06961	0.943654	0.807278	0.951897	1.49655	1.43071	1.35334	1.48024	1.38823	1.3728	1.60167	1.49944	1.32354	0.830063	0.820186	0.831717	1.06698	1.10939	1.11063
AP5B1	54	0.919529	0.876067	0.95984	1.00933	1.16399	1.20398	0.973854	1.08939	1.13835	0.857882	0.810166	0.786706	1.02387	1.03474	1.02255	1.10867	0.926616	0.927901	0.903764	0.744316	0.786636	1.28576	1.20676	1.21443	0.911312	0.884072	0.883367	1.05408	0.853663	0.898289	1.00687	1.0182	0.956043	1.2779	1.08625	1.31425	0.997308	0.880395	0.930309	1.12838	1.20844	1.08416	0.711691	0.696824	0.723427	0.804256	0.815578	0.879916
AP5M1	54	0.807483	1.08725	0.993884	0.776785	0.726546	0.73159	0.945354	0.790683	0.87477	0.845072	0.842758	0.931555	1.0569	0.886824	0.894626	0.866358	0.916269	0.917503	0.828351	0.746353	0.785742	1.0645	1.23327	1.26641	0.966431	0.855955	0.88253	1.00617	1.04361	1.1269	0.990128	0.863785	0.953417	1.33594	1.60707	1.50425	0.952052	0.982669	0.913992	0.939762	0.982007	1.02334	0.658373	0.689891	0.740723	1.31833	1.40415	1.18792
AP5S1	54	1.18462	1.1672	1.03389	1.10008	1.1555	1.07032	0.760033	0.752432	0.920821	0.930002	0.944776	0.960563	1.10652	1.05458	1.0287	1.2206	1.20633	1.24391	1.02712	1.1883	1.02269	1.32015	1.2222	1.20604	0.985749	0.835453	1.09	1.02788	0.927891	0.921704	0.995606	1.06515	1.11537	1.19719	1.08987	1.05231	1.07495	1.01847	1.03135	1.13179	1.06269	1.02326	1.05288	1.02012	1.05598	0.966839	0.940219	0.984079
AP5Z1	54	1.15188	1.04657	1.12332	0.960506	1.11879	0.980246	0.846791	0.704039	0.916117	0.737566	0.735459	0.82685	1.06292	0.994412	0.997222	1.6259	1.60007	1.49183	0.842493	0.867359	0.854726	1.18382	1.17134	1.1928	1.004	0.948518	1.04978	0.727612	0.699112	0.873304	1.11644	1.16162	1.11206	1.16769	1.10594	1.16193	1.0578	1.0695	1.14357	1.19277	1.11959	1.16212	1.08026	1.04402	1.05593	0.917623	0.947505	0.998407
APAF1	54	1.23423	1.2348	1.22101	1.0823	1.14433	1.06692	1.36893	1.42327	1.33952	0.703008	0.69396	0.80386	1.30391	1.28727	1.22418	1.05101	0.943389	1.06057	0.84746	0.877309	0.875796	0.837673	0.820229	0.867334	0.824093	0.791626	0.759263	0.765456	0.744039	0.758299	1.15483	1.12632	1.14411	1.172	1.16077	1.12776	0.789559	0.819688	0.750332	0.732304	0.685227	0.737777	1.1309	1.08392	1.07586	0.750981	0.789707	0.756414
APBA1	45	0.914208	0.952737	0.820758	0.607412		0.977189	2.96691	4.27904	3.49807	1.10389	1.2409	1.20357	0.614372		0.948593	0.660028	0.549969	0.469038	1.16396		0.900229	0.783867		0.95463	0.856366		0.762078	0.725149	0.636401	0.894292	1.02421		1.05582	0.403519		0.788059	0.568729		0.880637	0.686679	0.628387	0.536474	0.540749	0.675992	0.639148	0.801855		0.847465
APBA2	54	0.878015	0.952254	1.06204	0.883736	0.934203	0.980464	0.751876	0.727169	0.79445	0.677653	0.734516	0.693076	1.6518	2.74568	1.31834	0.535082	0.736043	0.737774	1.28653	1.63631	1.12054	0.97157	0.802362	1.06957	0.879	0.592067	0.882933	0.780122	0.922764	1.05119	0.983232	0.607733	1.08597	0.98547	0.510374	1.0141	0.90778	0.544712	1.06849	0.630912	0.733775	0.743279	1.81369	1.56749	1.48643	0.862507	0.531531	0.864752
APBA3	54	1.10085	1.21886	0.942757	1.06911	1.07177	0.637541	0.974114	0.828259	0.905944	1.01363	1.00052	1.04919	1.08701	0.896941	0.772519	0.994982	1.23205	1.13267	0.885395	0.988836	0.75197	1.257	1.20467	0.580235	1.41191	0.957217	0.601919	0.970207	1.12894	1.08057	0.780501	0.759904	0.489441	0.781088	0.77005	0.466147	1.06447	0.931126	0.441495	0.82471	0.831636	0.776438	1.03247	1.11879	1.0417	0.797168	1.0494	0.787202
APBB1	54	0.511758	0.414513	0.486955	1.38213	2.31017	2.23175	0.43345	0.326513	0.426275	2.44437	1.97103	2.46563	0.841294	0.911802	0.865252	0.446282	0.593759	0.478845	1.44538	1.79223	1.81843	0.710475	0.664453	0.704981	0.510073	0.372386	0.378186	1.27446	1.17074	1.37308	0.554449	0.318596	0.365717	0.558328	0.502664	0.484507	0.403569	0.383124	0.381949	0.465211	0.332377	0.522242	2.68919	1.90641	2.20641	0.747245	0.537141	0.556576
APBB2	54	0.521018	0.45476	0.619889	1.19382	1.48457	1.43011	1.9838	1.8078	1.74467	0.980582	0.866207	0.96005	0.602768	0.549678	0.717093	0.972692	1.05984	0.923617	0.742408	0.77421	0.778857	1.72255	1.76483	1.84278	0.736576	0.701436	0.745394	0.615951	0.568814	0.61732	0.948841	1.11912	1.2126	0.51986	0.439275	0.585157	1.14572	1.03176	1.39314	2.11936	1.78686	1.68769	1.22036	1.11308	1.17206	0.630844	0.578643	0.641766
APC	54	0.858569	0.826451	0.856925	1.21555	1.23175	1.21055	1.25562	1.2266	1.17142	0.790835	0.791203	0.787623	0.950881	0.891269	0.878803	1.07293	0.983764	0.990978	1.10278	1.06934	1.09096	1.03783	1.01994	1.04172	1.26802	1.27772	1.2888	1.17855	1.23386	1.19032	0.859405	0.860453	0.837415	0.913768	0.945243	0.950844	0.983658	0.998838	1.06567	1.02828	1.00072	1.06176	1.03274	0.992137	0.980862	1.02004	1.04224	1.0238
APCDD1	17			NA	0.812464					0.117468			5.10658	2.95221					0.409852	0.80642			0.836125			0.752794					0.308475	0.88901			0.636788			0.462166					0.0839789			0.0323847	0.584413
APCDD1L	9				0.830756									2.58947						0.843123			0.890582			0.859969						0.642591			0.87428			0.908155									0.885911
APEH	54	1.39348	1.4052	1.40104	0.855647	0.838413	0.868781	1.0513	1.06332	1.04717	0.903034	0.928151	0.916456	0.654006	0.673933	0.707462	1.517	1.45806	1.5057	0.783328	0.751028	0.755178	1.11444	1.09713	1.12703	1.07686	1.09264	1.07173	0.876069	0.884016	0.876481	0.937396	0.945175	0.924696	1.06007	1.02742	1.05367	0.941959	0.913228	0.896109	0.996943	1.00462	1.02641	0.750819	0.786473	0.786117	1.78924	1.75598	1.76268
APEX1	54	0.979466	0.997474	0.981496	0.95087	1.04144	1.04644	1.0707	1.11565	1.11882	1.02734	1.04014	1.03895	1.11376	1.14654	1.13056	0.848984	0.88925	0.858914	0.936894	0.990421	0.997375	1.10806	1.17758	1.17348	1.15117	1.16628	1.16875	0.830656	0.836547	0.823564	1.22533	1.25294	1.23217	1.13906	1.13067	1.11893	1.21304	1.22325	1.17515	1.19377	1.2313	1.24031	0.963785	0.912045	0.942208	1.08433	1.09876	1.10537
APEX2	54	0.94336	1.01922	1.00458	1.38668	1.51926	1.49704	1.06463	1.14351	0.961493	0.84526	0.826825	0.714232	1.26393	1.14204	1.14352	0.55224	0.405587	0.647715	0.843308	0.655313	0.874246	1.0086	1.04733	0.983765	1.22933	1.14496	1.24855	0.835889	0.762806	0.782652	0.931247	0.96866	0.932319	1.11605	1.11851	1.03437	1.03732	1.05759	0.990919	1.13957	1.04227	0.974684	0.765646	0.624509	0.724725	1.0836	1.06833	1.10841
APH1A	54	1.11197	0.986468	1.42529	1.6817	1.38301	1.45233	1.12293	0.946469	1.08018	1.16254	1.0511	1.17317	1.26508	1.34579	1.24972	0.829366	1.03189	1.2612	1.18805	0.736994	1.08468	1.26656	1.16077	0.882393	1.01978	1.17637	1.18685	1.05895	1.01886	1.15504	1.18904	1.11894	1.31561	0.775518	0.662429	0.819603	0.872891	0.852337	0.872684	1.11862	0.993604	1.04505	1.00051	0.773562	1.07963	0.785054	0.618054	0.595868
API5	54	1.0246	1.00515	1.00333	0.834311	0.879504	0.819208	1.1718	1.19654	1.16961	0.864917	0.82556	0.868197	1.44046	1.48106	1.44538	1.07745	1.09224	1.04089	1.05086	1.02828	1.03092	0.839934	0.904956	0.890975	0.884044	0.867147	0.885468	0.888149	0.881824	0.901532	0.823544	0.875433	0.8605	0.774592	0.778491	0.822543	0.953722	0.979888	0.949502	0.971704	0.942169	0.973857	0.99448	0.983806	1.0107	1.01054	1.05744	1.07251
APIP	54	0.644536	0.604237	0.707931	1.15318	1.19427	1.11579	0.80146	0.825865	0.831913	1.68821	1.79148	1.56563	0.915492	0.970261	0.974954	1.00987	0.943139	0.977651	1.25268	1.18971	1.32553	0.780081	0.771871	0.852108	0.789714	0.818206	0.763416	0.831578	0.8297	0.858022	0.748348	0.724825	0.792549	1.17316	1.21148	1.21356	1.1077	0.949026	1.09794	0.920399	0.895844	0.927081	1.09798	1.1193	1.16787	1.03886	0.967135	1.09993
APLF	54	1.22866	1.33794	1.23915	1.15223	1.04427	1.7843	0.766895	0.728622	0.94745	2.98825	3.09661	2.68471	2.18461	1.89183	1.63107	0.602372	0.515712	0.766659	1.51587	1.41231	1.54875	0.565799	0.669759	0.831765	1.04838	0.923827	0.936568	0.659939	0.670442	0.777587	0.43332	0.428395	0.309071	0.283804	0.32966	0.341853	0.36356	0.507234	0.639126	0.428601	0.414335	0.675199	1.24721	1.53181	1.39607	0.202095	0.591248	0.222291
APLP1	45	0.489437	0.717202	0.664166	2.24542		1.66902	1.08632	0.844343	1.19804	0.953063	0.835035	0.776851	0.857809		0.933686	1.15776	1.19374	0.782018	1.02209		1.22004	0.839282		1.08953	1.0881		1.01894	0.851875	0.81811	0.735781	0.766001		0.99783	1.16124		0.90949	1.06684		0.919008	0.694725	0.449391	0.544286	0.964423	1.56376	2.67167	0.710782		0.803791
APLP2	54	0.92908	0.911706	0.91389	2.63541	2.26614	2.41001	1.37139	1.40433	1.51996	0.850904	0.947257	0.918657	0.891749	0.853163	0.862847	0.848403	0.781383	0.86894	1.92214	1.63286	1.7919	1.20242	1.05351	1.14942	0.843505	0.815829	0.84089	0.702496	0.683646	0.715499	0.873155	0.900825	0.905197	0.622471	0.575903	0.614057	0.612565	0.60032	0.597826	0.659211	0.62286	0.655981	0.577015	0.637859	0.634526	0.826139	0.740931	0.757163
APMAP	54	0.763136	0.721394	0.751486	1.42075	1.21286	1.25048	0.849764	0.844418	0.835564	0.802711	0.791811	0.81589	0.714666	0.718106	0.733059	1.13355	1.08661	1.07057	1.83803	1.69984	1.80329	0.804554	0.791815	0.738457	0.624214	0.612193	0.617866	1.20188	1.18405	1.18811	0.907939	0.935042	0.89541	0.965363	0.91313	0.93749	1.11253	1.08174	1.069	1.06819	1.08278	1.03948	0.834937	0.827815	0.795399	0.960048	0.956908	0.977237
APOA1	54	4.21857	2.32394	3.73725	1.50477	2.15228	1.82184	0.681934	1.18734	0.782426	0.398037	0.335989	0.368947	0.60799	0.443733	0.471172	1.27939	0.725888	1.23449	1.15534	1.03342	1.16345	0.631264	0.33883	0.507234	0.579204	0.508227	0.619798	0.408265	0.512949	0.431291	0.587507	0.383387	0.53607	1.16525	0.761532	0.749409	1.04238	0.83658	0.693819	0.458262	1.04157	0.661408	0.750982	0.799336	0.745773	1.10691	0.291125	0.542425
APOA1BP	54	0.924809	0.911745	0.912915	0.710017	0.727431	0.702999	0.68334	0.649534	0.626784	0.902322	0.872662	0.852011	1.0998	1.0324	1.03004	0.889965	0.829047	0.822815	1.05025	1.03909	1.02552	1.04198	1.1038	1.0787	1.00513	0.9882	0.9762	0.995382	0.954945	0.990602	0.769843	0.788088	0.750523	1.12321	1.13981	1.08374	0.873512	0.845894	0.824987	0.769608	0.770104	0.770157	0.967511	0.932952	0.92363	1.73861	1.77255	1.69607
APOA4	27	1.75757			1.64497	1.38405		0.935184			1.49062			2.48231	1.0783		1.12622			1.00978	0.99691		0.932943	1.06847		0.708399	0.876322		0.556537			1.21215	0.885165		0.674351	0.852745		0.858998	0.79137		0.615061			0.788027			0.727995	0.953216
APOB	54	0.591275	0.613444	0.599461	7.0962	6.82987	6.51743	1.25451	1.27149	1.52777	0.631109	0.548176	0.684037	0.634055	0.78474	0.758923	0.683278	0.638516	0.729077	0.858001	0.720867	0.788323	0.624292	0.637083	0.618406	0.74747	0.693762	0.707482	0.508451	0.44967	0.519289	0.530711	0.549045	0.53409	0.597388	0.628942	0.559815	0.565318	0.577726	0.491823	0.436012	0.403805	0.487401	0.558629	0.602039	0.557267	0.577315	0.595623	0.530104
APOBEC3B	54	0.816765	1.00042	1.02026	1.10069	0.931457	0.952649	0.765578	0.783849	0.831258	2.81133	3.58349	3.02675	0.725346	0.663395	0.945154	0.606461	0.641734	0.624161	1.11292	1.06985	1.04028	0.871264	0.890935	0.886571	1.06262	0.957919	0.991112	0.578788	0.759278	0.568334	0.561149	0.412436	0.489787	0.595275	0.392474	0.381241	0.622076	0.452275	0.476108	0.475878	0.50766	0.548782	0.70783	0.633486	0.679447	0.444101	0.342321	0.610579
APOBEC3C	36	1.68154	1.49955	1.88695		0.460527		0.921044	1.08693	1.03304	1.25132	1.31959	1.21229		0.878634		0.422853	0.728375	0.496127		0.657492			1.8653			0.686853		1.63374	1.7343	2.0049		0.664355			0.352161			0.344304		0.388557	0.536673	0.356236	1.68051	1.71546	1.73318		0.50134
APOBEC3D	9			1.19975						0.87222			1.23158						0.884597												0.809255												0.773949			1.7371
APOBEC3F	54	0.721067	0.747738	0.801418	0.284318	0.319222	0.265432	0.38849	0.561737	0.580943	3.99208	3.18015	3.35178	1.11752	1.05211	1.07998	0.514385	0.473331	0.5226	0.567213	0.590023	0.734369	1.38915	1.59246	1.20895	0.39165	0.314895	0.40369	1.43191	1.42925	1.36753	0.329285	0.327229	0.300993	0.393928	0.295752	0.369673	0.20777	0.104659	0.219945	0.356355	0.38216	0.509895	1.69973	1.62082	1.77469	0.208926	0.12423	0.183956
APOBEC3G	27	0.514112	0.377868	0.437601				0.638194	0.622813	0.611925	0.75537	0.632852	0.799226				1.46551	1.71177	1.7274										3.04346	4.23348	4.59926										0.745728	0.575172	0.552128	0.464225	0.437161	0.467027
APOBR	27	0.716895	1.06625	0.886196				0.96698	0.756853	0.653578	0.834104	0.944711	0.873371				1.11154	1.66405	1.52249										1.18178	0.746652	0.883542										0.983635	0.922758	0.730889	0.672787	1.05896	1.02065
APOC1	27	1.49687		1.09671		0.701695		5.57274		3.46885	2.75602		1.80725		0.707686		1.6594		1.55586		0.678917			0.733949			0.258116		1.5752		1.32181		0.619908			0.350196			0.299062		0.972809		0.837992	0.826591		0.742249		0.384631
APOC3	53	4.64022	4.42401	5.01164	7.10583	6.49631	5.77647	0.833315	0.812003	0.60975	0.532409	0.574964	0.626558	NA	0.404108	0.459651	0.85923	1.00179	0.534455	0.707626	0.59271	1.01356	0.204479	0.695983	0.391978	0.604067	0.617971	0.692395	0.498441	0.570553	0.539099	0.203847	0.139839	0.403435	0.699436	0.847703	0.839431	0.350906	0.399754	0.439705	0.795623	0.745037	0.5601	0.79812	0.877021	0.686346	0.135161	0.263214	0.339779
APOD	54	0.665438	0.460171	0.680083	0.990008	0.309486	0.206773	0.796284	0.652325	0.702212	0.678602	0.523241	0.624097	0.400181	0.200693	0.152296	0.670334	0.641808	0.689443	0.952589	0.76791	0.802094	0.396075	0.328213	0.204719	0.484538	0.303171	0.195302	0.523943	0.474667	0.63727	0.333599	0.30018	0.225841	0.499271	0.35098	0.238881	1.26778	1.13386	1.35235	1.58582	2.07208	1.67556	1.18726	1.17296	1.21594	0.666003	0.571719	0.60109
APOE	54	1.03496	0.762651	0.644396	1.47199	2.67539	2.8395	1.29709	1.35771	1.95324	0.932618	1.03393	1.03365	1.35798	1.06538	1.04054	0.735926	0.72931	0.629456	0.580899	1.02091	1.2702	0.660144	0.700975	0.547881	0.468057	0.731047	0.749074	1.00278	1.07581	1.13631	0.509359	0.614038	0.642731	0.402512	0.705826	0.533605	0.414775	0.692618	0.544253	0.712527	0.645485	0.755801	1.0252	1.01667	1.00372	0.417422	0.519842	0.562468
APOH	27			4.88668	6.94677	2.04795				0.698575			1.14971	0.435812	0.663777				1.13739	0.967978	0.717445		0.530547	0.435502		1.21165	1.2995				0.77941	0.554945	0.609847		0.751413	0.830166		1.4407	2.09994				1.89047			0.945489	0.315367	0.512963
APOL1	27	0.827615				0.799428	0.871021	1.61981			0.562494				0.685024	1.01593	0.547111				0.846471	1.28126		1.74963	2.39117		1.06462	0.715913	1.423				3.32314	5.25999		0.393926	0.405655		0.499281	0.745201	0.443079			1.69669				0.505905	0.52506
APOL2	54	1.24774	1.27792	1.17757	1.63982	1.71784	1.67034	0.753851	0.774224	0.777088	0.837328	0.768067	0.874917	0.634349	0.618698	0.70688	1.2622	1.31601	1.26257	1.02189	0.967039	1.02045	0.989362	0.989091	0.96531	0.83059	0.760594	0.865066	1.03991	1.04631	1.06255	1.57162	1.51802	1.48567	0.851057	0.836571	0.90095	0.444751	0.480775	0.61134	0.619973	0.605126	0.665289	1.82116	1.84679	1.72562	1.45107	1.43256	1.3714
APOL3	27				1.01759	1.22408	1.30165							1.32299	1.4921	1.59352				0.577621	0.667189	0.50986	2.17611	2.01249	2.00194	0.831916	0.94477	0.975183				4.14051	4.06311	3.83363	0.430621	0.683324	0.589328	0.434861	0.692812	0.454576							0.537768	0.573694	0.699479
APOL6	54	0.889799	0.843649	0.890585	1.75078	1.83624	1.55235	0.508631	0.672389	0.5956	0.696966	1.06073	0.842675	1.19968	1.23251	1.16383	0.604884	0.621327	0.533427	2.32715	1.64142	1.66727	1.76998	1.6892	1.69763	1.98001	1.84397	1.72505	0.699698	0.777435	0.865933	2.17864	1.72931	1.71099	0.647425	0.580282	0.648103	0.486826	0.600115	0.598676	0.476711	0.607155	0.494164	1.08511	1.1496	1.28279	0.65177	0.66835	0.539969
APOM	27	1.86439				2.86997	4.37669	1.06661			0.591627				1.44015	0.840153	1.07749				1.27717	1.99259		0.839867	0.851757		0.786638	0.837592	1.04365				0.884482	0.755089		0.803506	0.750637		0.658691	0.913576	1.039			1.14247				0.757625	0.738721
APOO	54	0.813914	0.768195	0.831562	1.23926	1.26173	1.24763	1.23736	1.18538	1.12958	0.870677	0.666794	0.837668	0.597559	0.743977	0.614348	1.37959	1.32456	1.34302	1.33431	1.22742	1.18121	0.726654	0.915243	0.760563	1.17769	1.05405	1.12633	0.610489	0.513174	0.609359	1.12312	1.17183	1.13326	1.00113	0.941378	0.921955	0.888703	1.03992	0.883247	0.870996	0.941807	0.928563	1.47151	1.41371	1.56175	1.40707	1.39773	1.25569
APOOL	54	0.867849	0.876995	0.85842	0.896858	0.991845	0.762982	0.711966	0.66827	0.852187	0.881608	1.00143	0.914378	1.31955	1.39958	1.2685	1.37646	1.27217	1.36209	0.970637	0.9827	0.926542	0.753242	0.822211	0.731382	0.927245	0.962164	0.940783	0.997451	0.952207	1.06091	1.04218	1.0472	1.04036	0.770772	0.79195	0.723535	1.18058	1.23705	1.06656	0.972237	0.965102	1.07219	0.841475	0.753173	0.813573	1.56788	1.53091	1.60854
APP	54	0.966538	1.04171	1.03469	2.02689	1.93239	1.99838	0.722583	0.669723	0.706814	0.966022	0.981199	0.963976	0.965373	0.918257	0.918924	1.05802	1.03801	1.07532	2.07131	1.82317	2.11994	0.953135	0.867347	0.886262	1.16556	1.13884	1.18075	1.02407	1.03972	0.99503	1.17911	1.17334	1.20783	0.501131	0.463449	0.479118	0.556374	0.455581	0.50123	0.542697	0.485439	0.514955	1.0417	1.08788	1.04686	0.723491	0.655593	0.704843
APPBP2	54	0.795037	0.754002	0.792892	0.788687	0.674571	0.710405	0.970732	0.957652	0.900782	0.838649	0.754243	0.679632	0.712183	0.7177	0.797077	0.83733	0.818912	0.678565	0.587495	0.631094	0.641967	0.767776	0.76913	0.732157	0.861666	0.957623	0.90773	0.897452	0.793256	0.774082	0.719675	0.735103	0.687169	1.72539	2.19434	2.40611	1.63779	1.91163	2.12655	2.1019	2.2257	2.38447	1.11305	1.04793	1.09704	0.626893	0.674723	0.725181
APPL1	54	1.07914	1.15305	1.17283	0.857694	0.957674	0.861388	0.949214	0.908808	0.894941	1.05013	1.11296	1.11662	0.974769	1.01804	0.98682	1.85846	1.78245	1.81277	1.12519	1.12582	1.13628	0.961112	0.97606	0.957763	1.02102	1.02895	1.03371	0.714992	0.722009	0.683648	0.811641	0.854606	0.857536	1.02777	1.00391	0.991291	0.850704	0.817343	0.812319	0.823577	0.814925	0.798795	0.737531	0.712338	0.763155	1.42519	1.38449	1.39746
APPL2	54	1.08367	1.08007	1.13578	0.584752	0.528328	0.57929	1.14137	1.14766	1.07103	0.867813	0.890847	0.882974	0.697558	0.588712	0.629548	1.50814	1.54883	1.57029	1.05861	1.01665	1.05806	0.873564	0.82012	0.842788	0.792112	0.73606	0.738275	0.829124	0.849012	0.820042	1.25012	1.13833	1.19011	1.17602	1.0786	1.10164	1.51955	1.34193	1.38892	1.23748	1.21353	1.24091	1.14715	1.08463	1.16273	1.00985	0.99037	0.949919
APRT	54	1.12261	1.21838	1.21851	0.628184	0.578577	0.648631	0.923079	0.958794	0.904934	0.983455	0.98617	1.00702	0.626631	0.578864	0.664545	0.720329	0.741914	0.735481	0.797852	0.815634	0.796972	1.01186	1.10966	1.07276	0.948266	0.845547	0.94584	1.20335	1.27984	1.23497	1.2289	1.24018	1.19396	1.06508	1.08258	1.08212	1.29321	1.30897	1.30559	1.26955	1.26264	1.26636	0.738063	0.684917	0.693837	0.856543	0.865439	0.871717
APTX	54	0.889896	0.875658	0.835676	1.27469	1.19094	1.24152	1.08879	1.09583	1.06191	1.15804	1.08863	1.10709	0.986261	0.981698	1.07068	0.816923	0.794258	0.802482	1.1654	1.07579	1.24082	1.11383	0.994343	1.11956	1.01291	0.917107	0.978182	0.816218	0.820289	0.83542	1.31179	1.21717	1.33819	0.96429	0.956027	1.04679	0.975811	1.01743	1.04565	1.0647	1.00702	0.997388	0.789454	0.80392	0.78951	1.18809	1.09855	1.16639
AQP11	18				0.683335	0.861809								0.861609	0.680015					2.51592	2.34831		0.871292	0.650057		0.756972	0.673795					0.687268	0.780475		1.19103	1.12743		2.59896	1.81782								0.721571	0.822311
AQP3	54	0.618879	0.540484	0.749593	0.939667	0.897068	0.973384	0.71344	0.708112	0.673609	0.814611	0.710677	0.821611	1.01691	0.86748	1.06798	0.710654	0.667878	0.54993	0.860126	0.919707	1.74115	1.32654	1.22885	1.49905	0.854582	0.766456	0.842823	0.561051	0.533849	0.834481	1.08299	1.21709	1.14311	1.03885	1.11472	0.587343	1.18065	0.894687	0.821671	1.03761	1.17467	0.997675	0.659869	0.500445	0.881575	2.62962	2.83683	2.31519
AQR	54	0.886513	0.943372	0.95067	0.913404	0.855245	0.859625	1.07473	1.08115	1.09119	0.94773	1.00918	0.962248	1.02427	1.01861	1.0439	0.823634	0.796976	0.843487	1.12397	1.10482	1.12439	0.9924	1.00832	1.01588	1.00419	0.933785	0.998762	0.993827	1.00129	1.03531	0.956494	0.889818	0.923701	1.01531	0.998785	0.969231	0.909937	0.914399	0.89911	0.923324	0.908777	0.9561	0.912289	0.903936	0.946157	0.855007	0.817065	0.83361
AR	54	0.86822	0.445715	0.594457	1.20586	1.30755	1.14107	0.467955	0.562443	0.52813	0.648519	0.636484	0.522351	1.19286	1.47054	1.44792	2.05584	1.97507	1.7701	0.81397	0.574878	0.433917	0.712032	0.483453	0.388802	1.04585	1.16208	1.26665	0.390619	0.607872	0.505617	0.82813	0.806704	0.79947	1.70335	2.2646	2.40492	0.996927	1.03915	1.05506	1.17839	1.0665	0.979871	0.564526	0.78041	0.65168	0.851704	0.892961	1.03095
ARAF	54	0.793705	0.721834	0.753236	0.935579	0.929106	0.951833	0.792361	0.757843	0.77291	0.820738	0.889258	0.79062	0.741615	0.734898	0.809292	1.21933	1.10881	1.24584	0.944086	0.937654	0.961496	0.801164	0.760878	0.731465	1.03798	0.996447	1.03778	0.802107	0.741089	0.785092	0.714434	0.645566	0.596808	1.12357	1.10739	1.12356	1.14113	1.09911	1.1511	0.992972	1.0193	1.04309	1.79548	1.75808	1.76858	0.881161	0.853921	0.830159
ARAP1	54	0.653399	0.749882	0.747713	0.869146	0.936101	0.931552	1.13298	1.25176	1.21543	0.864076	0.871823	0.885588	1.08233	1.04493	1.08572	0.693309	0.726359	0.705902	0.822757	0.928735	0.890747	1.15454	1.21381	1.16315	0.784007	0.866767	0.781285	0.970239	0.980649	0.959287	0.976178	0.995641	0.94912	1.20791	1.20222	1.17164	1.29429	1.25483	1.25186	1.22385	1.37263	1.35782	1.13869	1.21508	1.24365	0.877612	0.874861	0.89879
ARAP2	54	1.46267	1.80359	1.37868	0.48987	0.671767	0.639427	0.931704	0.726993	0.84951	1.15448	1.3007	1.21676	0.857626	0.9506	0.965009	1.41146	1.96216	1.56007	0.624446	0.67943	0.649936	1.03702	1.21945	1.19446	1.12755	1.21035	1.28523	1.05849	1.54214	1.36909	0.993529	1.03726	1.02061	1.04614	0.642142	0.788942	0.714691	0.763449	0.871057	0.90054	0.698754	0.845093	0.694719	0.63923	0.750272	0.862572	0.808967	0.890485
ARAP3	54	0.932348	1.11027	1.00725	0.546186	0.469626	0.520366	1.98209	2.1666	1.99286	0.836427	1.03156	1.02081	0.518725	0.549432	0.531068	0.663505	0.654006	0.670732	1.2333	1.05518	1.0612	1.41895	1.25268	1.26463	0.937127	0.91663	0.99923	1.38833	1.61892	1.54238	1.38145	1.23801	1.35754	0.622416	0.605571	0.483396	0.565471	0.632712	0.393601	0.562174	0.549372	0.599994	1.78412	1.77317	1.78359	0.583265	0.597011	0.37416
ARC	18				1.41749	0.78753								1.05504	0.760955					1.47846	1.01418		0.726608	0.688313		0.857563	0.806242					1.02115	0.995352		1.30619	0.879987		0.996312	0.990771								1.35876	1.0662
ARCN1	54	1.00101	1.02121	0.999366	0.91524	0.949915	0.952169	1.02631	1.04128	1.04266	0.874446	0.836144	0.870926	1.07104	1.04602	1.04964	1.15444	1.16148	1.15153	1.0805	1.08482	1.08554	0.915405	0.90674	0.919322	0.882374	0.871253	0.86779	1.05282	1.05551	1.07186	0.903108	0.931093	0.936102	0.973904	0.988037	0.977836	1.00849	0.996458	1.00672	1.09252	1.09848	1.08342	1.02881	1.00148	1.01232	1.22813	1.2209	1.25787
AREL1	54	0.57685	0.583032	0.637066	1.06148	1.05985	1.12618	0.961471	0.796922	0.770036	1.19012	1.13245	1.17325	1.11485	1.1736	1.18723	1.2336	0.995638	1.03274	0.983479	1.07919	1.57252	0.872681	1.06326	0.785151	0.930461	0.785754	0.780095	0.87098	0.813556	0.910705	0.880718	0.925295	0.745768	1.0898	0.977185	1.03157	1.05123	1.07781	0.963256	1.30523	1.19865	1.12003	1.40899	1.43786	1.19687	1.12542	0.90182	0.91165
ARF4	54	1.16377	0.983192	1.03828	1.20672	1.2781	1.30576	0.870113	0.844796	0.862809	0.823185	0.838642	0.81177	0.858409	0.852483	0.851276	1.42677	1.45205	1.4708	0.976101	0.89245	0.974446	0.87584	0.85778	0.926823	0.809743	0.706925	0.802902	0.82229	0.794489	0.747309	0.868358	0.833463	0.905575	0.70619	0.623857	0.641025	0.701865	0.607154	0.663795	0.746882	0.756948	0.673113	0.847891	0.808824	0.804663	0.881573	0.853357	0.887671
ARF5	54	1.0493	1.17885	1.1135	0.67769	0.644586	0.727908	0.831019	0.868363	0.860704	0.979238	1.03223	1.01884	1.24592	1.28931	1.22304	1.09197	1.07611	1.114	1.06132	1.06912	1.08164	0.87322	0.822112	0.870991	0.959732	0.972002	0.962611	0.879899	0.861605	0.865313	1.22102	1.24355	1.17732	0.855648	0.842958	0.839255	1.19466	1.16816	1.20434	1.19261	1.20802	1.21376	1.13405	1.13542	1.16955	1.46103	1.4921	1.44307
ARF6	54	0.813472	0.80634	0.805116	0.920313	1.07409	1.01819	0.77587	0.723396	0.742122	1.1239	1.005	1.09227	0.658918	0.727189	0.645042	1.00691	0.997	0.94431	0.698184	0.735897	0.684985	0.842637	0.945074	0.84053	1.04097	1.01643	1.018	1.03513	0.98625	1.01662	1.17893	1.17548	1.2292	1.24905	1.30707	1.43832	1.17033	1.22581	1.29145	1.19007	1.18562	1.10728	0.911462	0.833274	0.813957	1.08018	1.15842	1.25914
ARFGAP1	54	1.24596	1.18023	1.18334	0.853654	0.992767	0.948912	0.815474	0.877034	0.837376	0.871963	0.914929	0.89845	0.995013	0.946059	0.959506	1.03457	1.03011	0.999159	0.984691	1.02361	0.987715	0.990052	1.01364	1.04696	0.822327	0.782657	0.795908	0.943795	0.915959	0.945203	0.817527	0.807729	0.822437	0.88217	0.885899	0.865533	1.36428	1.27873	1.36498	1.44702	1.51414	1.48693	1.44947	1.49122	1.43812	1.33186	1.34274	1.37421
ARFGAP2	54	0.889314	0.872494	0.860316	0.711235	0.687639	0.702265	0.917231	0.900307	0.896168	0.754113	0.773741	0.808177	1.17638	1.15284	1.22898	1.41998	1.40176	1.37648	0.908652	0.944034	0.897628	0.951558	0.967756	0.98124	0.921569	0.913436	0.932397	1.01103	1.02065	0.988898	0.948276	0.92336	0.901512	1.12791	1.13191	1.16207	1.34651	1.31179	1.36409	1.36785	1.37747	1.36967	0.889417	0.92472	0.926135	1.14885	1.1709	1.19555
ARFGAP3	54	0.77026	0.80301	0.801818	1.02608	1.05211	1.15185	1.01726	1.05638	1.0678	1.50589	1.60574	1.56836	0.716185	0.81312	0.800539	1.37866	1.44604	1.44204	1.269	1.26679	1.35841	0.834964	0.776083	0.812151	1.05975	1.02823	1.10576	0.925295	0.942248	0.958105	1.26406	1.2229	1.27634	0.715214	0.712955	0.714223	0.683723	0.642794	0.722769	0.626176	0.628854	0.680082	1.44178	1.43945	1.44828	0.919262	0.923236	0.906877
ARFGEF1	54	0.922881	0.899829	0.893502	1.03686	1.02833	1.11298	1.01544	1.03544	1.03788	1.04596	1.04007	1.01182	0.949703	0.897242	0.91705	1.47165	1.50026	1.4488	1.43219	1.39718	1.47585	0.858115	0.840446	0.850662	1.16667	1.19508	1.23526	1.02054	1.00474	1.03896	1.02234	0.98392	1.02135	0.644376	0.653642	0.648486	0.861554	0.804803	0.791052	0.899239	0.873366	0.885075	0.90389	0.910384	0.91983	1.03697	1.02091	1.08051
ARFGEF2	54	1.06691	0.990529	0.986096	0.810451	0.739924	0.813288	0.77416	0.742362	0.786969	0.836618	0.785799	0.849635	0.568714	0.547143	0.61143	2.7315	2.5326	2.69754	1.49397	1.46375	1.50419	0.74237	0.639787	0.710088	0.800771	0.749399	0.759953	0.84371	0.840729	0.853182	0.834988	0.764858	0.839042	0.788308	0.779217	0.776645	0.866957	0.839855	0.860581	0.930337	0.904018	0.899646	0.754987	0.747761	0.770328	1.59883	1.6306	1.65485
ARFIP1	54	1.72285	1.67284	1.66705	0.812718	0.819572	0.849785	0.885129	0.934305	0.927675	0.904868	0.901359	0.903416	0.873347	0.896747	0.862563	1.52765	1.67695	1.63109	0.947078	1.00059	0.957419	1.10501	1.14061	1.13777	1.03805	1.03833	1.02689	1.07289	1.0702	1.09045	0.886931	0.925336	0.917075	1.06922	1.06401	1.08186	0.998833	1.07361	1.01845	0.937333	0.964165	1.01095	0.785182	0.807038	0.81127	0.9195	1.00195	0.97963
ARFIP2	54	0.778492	0.744772	0.807338	0.615242	0.712892	0.52868	0.669151	0.608629	0.633193	0.661281	0.597227	0.707322	1.31514	1.38697	1.4974	2.45298	2.48943	2.57604	0.675731	0.753203	0.528742	0.717105	0.686921	0.656808	0.725637	0.722633	0.568285	0.651669	0.650083	0.706182	0.707842	0.738744	0.502429	1.45186	1.35632	1.40232	0.74456	0.719066	0.652113	0.830156	0.693943	0.858493	0.773764	0.735786	0.710495	2.01483	1.94304	2.24858
ARFRP1	54	0.820555	0.866495	0.86013	1.10968	1.05565	0.836479	0.893123	0.90022	0.901393	0.75576	0.535421	0.706436	0.667398	0.708518	0.638577	2.83623	3.03949	2.82284	0.776716	0.711973	0.762967	0.980327	0.98241	0.969377	1.07787	1.13287	1.07978	0.751793	0.636303	0.705947	0.965462	1.00645	0.990318	0.6426	0.616709	0.584311	1.07533	1.11126	1.07734	1.1822	1.28148	1.28155	1.2868	1.24794	1.33892	1.28556	1.28309	1.12964
ARG2	54	0.784567	0.879527	0.71407	2.10761	1.83391	1.64816	0.596815	0.824489	0.540522	0.772917	0.821824	0.727265	1.52277	1.15885	1.28194	0.563299	0.740687	0.471507	0.752933	1.00225	0.868557	2.79441	2.31234	1.98734	0.745952	0.775303	0.701387	1.07685	1.28097	1.07486	1.30915	1.32837	1.28532	0.720213	0.563053	0.767121	0.66158	0.635671	0.723687	0.496411	0.578756	0.614397	0.637948	0.698843	0.781841	0.664424	0.715459	0.718781
ARGLU1	54	0.854356	0.860583	0.833249	1.12867	1.10502	1.12362	1.18297	1.28412	1.22797	1.02772	1.10129	1.0547	1.2895	1.28168	1.24844	1.06115	0.95207	0.985813	1.11145	1.10504	1.09042	1.19389	1.12351	1.12226	0.995989	0.988698	0.949344	1.17402	1.21464	1.21006	1.18396	1.07357	1.13507	0.937964	0.912342	0.910556	0.968526	0.962272	0.952095	1.01534	0.981974	0.997535	1.05908	1.21759	1.16412	1.18624	1.13445	1.16961
ARHGAP1	54	0.894003	0.89344	0.872794	0.762877	0.900527	0.885111	0.94494	0.89408	0.925043	0.820234	0.750533	0.816755	1.0291	1.01486	0.981735	1.38358	1.37985	1.39726	0.744791	0.81793	0.788319	0.810274	0.835498	0.816428	0.773238	0.800468	0.802915	1.0519	1.05316	1.07656	1.02387	1.04427	1.01917	0.906898	0.949369	0.908019	1.21356	1.25909	1.15271	1.16087	1.14446	1.16888	0.895931	0.903182	0.914201	1.13297	1.17488	1.08147
ARHGAP10	54	2.88994	3.6848	3.05743	0.815699	0.832312	0.823425	0.613853	0.484118	0.680052	0.773608	0.678419	0.734393	0.681412	0.645202	0.666019	1.63386	1.99736	1.60973	0.931151	0.969726	0.903886	1.02208	1.04021	1.03695	0.820386	0.819177	0.782701	0.878426	0.873002	0.924602	0.817205	0.788442	0.788502	1.02013	0.967414	0.978721	1.0485	0.965774	0.943169	0.929298	0.975391	0.919729	0.805237	0.839167	0.864348	1.23755	1.21176	1.24634
ARHGAP11A	54	1.07247	1.19717	1.08189	1.02515	1.07333	0.904985	1.16542	1.25502	1.22363	1.08361	1.25494	1.18403	0.872086	0.684414	0.870827	0.685845	0.632964	0.519476	0.947382	0.870351	1.00792	1.06889	1.03675	1.04577	1.2843	1.31581	1.36818	0.835864	0.867098	0.933679	0.880779	0.809601	0.91376	0.913247	0.92185	1.04977	0.712665	0.721934	0.8457	0.821846	0.763298	0.852273	0.923235	0.847089	0.911725	0.815018	0.869085	0.910832
ARHGAP12	54	1.2007	1.2804	1.25951	1.15923	1.33834	1.31687	0.963796	0.952201	1.01023	1.21446	1.29015	1.21654	1.00869	1.01774	1.05616	0.864324	0.841968	0.873976	0.902544	0.877913	0.965105	1.18959	1.13478	1.14147	1.12933	1.12344	1.09773	1.01758	1.0763	1.07587	1.41078	1.3071	1.42287	0.897551	0.853736	0.89803	1.26985	1.19394	1.30357	1.16572	1.18399	1.15089	0.880507	0.826753	0.850952	0.671617	0.629381	0.637958
ARHGAP17	54	1.08912	1.07474	1.01466	1.1434	1.35155	1.41277	0.964215	1.04777	1.01703	0.737858	0.733459	0.766554	1.40581	1.49839	1.4751	1.33315	1.32678	1.1628	1.01113	0.966533	1.10136	0.83327	0.826279	0.761015	0.765775	0.869981	0.707387	0.975913	1.01222	1.00595	1.10086	1.10388	1.1159	0.840694	0.932473	0.806051	0.967234	0.985859	0.969128	0.891365	0.91567	0.924589	1.17668	1.16946	1.1901	1.01171	1.04318	0.968715
ARHGAP18	54	0.549217	0.491221	0.509993	2.33968	2.20826	2.19943	1.09524	1.06779	1.09061	1.02935	1.06739	1.0964	0.605241	0.615791	0.63842	0.95242	0.926066	0.933432	1.2096	1.10397	1.14123	1.44842	1.38951	1.45694	0.937139	0.857503	0.91202	1.43841	1.51262	1.5262	1.18327	1.10012	1.17492	0.823986	0.785456	0.79777	0.796352	0.735211	0.748691	0.654701	0.662691	0.620968	0.905215	0.898552	0.843168	0.774672	0.76249	0.752903
ARHGAP21	54	1.32684	1.3481	1.27027	1.27862	1.24618	1.31352	0.88308	0.929188	0.940017	1.64618	1.67918	1.63827	1.19784	1.1641	1.24611	0.685573	0.674397	0.658654	1.20921	1.16887	1.24752	1.19691	1.16471	1.16574	0.94304	0.943113	0.920867	1.14796	1.28064	1.20313	1.49845	1.53598	1.58775	0.637197	0.60789	0.609884	0.669236	0.659977	0.681638	0.650598	0.648662	0.588745	0.972538	1.02214	1.02489	0.667073	0.575622	0.585329
ARHGAP22	18	0.78919			0.948618			0.818912			1.28678			4.70465			1.01831			0.306745			0.428955			0.265929			1.30358			0.786538			0.777377			0.647727			0.845582			1.20776			1.03424
ARHGAP23	54	0.790186	0.707491	0.754339	1.1462	1.46347	1.34715	3.15056	3.56078	3.23448	1.11428	1.07487	1.20309	1.32989	1.23454	1.34042	0.620256	0.51048	0.770366	0.669479	0.766421	0.747005	2.798	2.62801	2.31664	0.71412	0.618723	0.720967	1.08417	1.02147	0.948961	0.606303	0.714031	0.671264	0.490099	0.495208	0.492582	0.507828	0.44129	0.617757	0.674669	0.5354	0.523449	1.14072	1.15311	1.19409	0.443739	0.459137	0.495339
ARHGAP24	54	0.920561	0.673568	0.6326	1.18948	1.29887	1.0208	1.45877	1.75347	1.93975	1.11919	1.06956	0.961299	1.01383	1.02836	0.734841	1.09107	1.13678	1.15026	0.603824	0.80665	0.800956	0.600452	0.490506	0.751277	0.994526	0.949256	0.959502	0.964373	0.472229	0.59473	1.1959	1.09133	1.36082	0.63301	0.860559	0.798648	1.37316	1.50602	1.33542	1.04547	1.15036	1.09316	0.952683	1.0042	0.883357	0.878613	0.969295	1.16237
ARHGAP26	54	1.42226	1.35918	1.33208	1.24914	1.33125	1.30836	0.682298	0.429249	0.657242	0.941233	0.841693	0.854796	1.46876	1.79682	1.66863	0.850447	0.878373	0.896795	1.12427	1.31251	1.32015	1.48633	1.69409	1.69826	0.863129	0.870646	0.829083	1.17846	1.45867	1.38274	0.988353	1.01346	0.992454	0.598494	0.49447	0.57998	0.82934	0.787022	0.83362	0.563312	0.530403	0.529613	1.16484	1.26105	1.25598	0.703142	0.581002	0.610964
ARHGAP28	27	1.66153	4.15901	3.26091				0.706755	0.310405	0.868656	1.5371	2.23268	1.6486				1.044	0.603354	0.744733										1.22469	1.70578	1.34969										1.0111	0.215583	0.716787	0.998406	0.361106	1.01183
ARHGAP29	54	1.21607	1.22036	1.1624	0.653927	0.712711	0.66681	0.882297	0.839059	0.853157	1.26559	1.31985	1.24796	1.16586	1.12789	1.15564	0.89828	0.86305	0.837107	0.597334	0.713153	0.588348	2.21733	2.48339	2.36379	1.34538	1.38059	1.39536	2.48037	2.74877	2.56213	1.25328	1.23286	1.26037	0.501628	0.489242	0.39889	0.400994	0.410555	0.351788	0.414995	0.345454	0.452073	0.996801	0.997054	0.970934	0.618735	0.591024	0.558148
ARHGAP31	54	0.813644	0.771928	0.7097	0.809196	0.993881	1.04054	0.565878	0.579198	0.639242	1.1447	1.43705	1.52649	1.54054	1.8175	1.4731	0.696171	0.678661	0.655855	1.35506	1.43691	1.27453	1.60125	1.71733	1.16748	0.617011	0.64491	0.921282	0.812929	0.812974	0.912454	0.589164	0.69659	0.786105	0.640844	0.573517	0.854821	0.651392	0.5111	0.454998	0.64413	0.543521	0.605027	1.51532	1.9109	1.52969	0.581166	0.435527	0.786948
ARHGAP32	54	1.06679	1.04276	0.981311	0.724028	0.811965	0.732162	0.623635	0.629271	0.651982	0.769774	0.778671	0.827653	1.59499	1.48526	1.72908	1.20147	1.1878	1.1402	0.840922	0.897839	0.827972	0.968444	0.940809	0.949202	0.79608	0.89253	0.813441	0.710717	0.662488	0.661229	1.17182	1.14131	1.16759	0.79652	0.853503	0.850677	0.769926	0.814191	0.773667	0.824271	0.869009	0.836475	0.772729	0.761298	0.767557	1.34762	1.34996	1.37078
ARHGAP33	27	0.741659			1.04335		0.983907	1.1739			1.31757			1.72543		1.54759	1.03201			0.885402		1.09552	0.811127		0.922786	0.827466		0.96977	0.936235			0.748902		0.819248	0.826229		0.85658	1.55604		1.60761	1.34588			0.942404			0.622758		0.935208
ARHGAP35	54	1.11398	1.05713	1.07434	0.774696	0.819594	0.798079	1.23341	1.31584	1.2736	0.844055	0.799343	0.852818	1.00169	0.981093	0.970731	1.14429	1.09585	1.0923	0.848728	0.856033	0.890452	0.860015	0.828117	0.872461	0.973015	0.947096	0.970718	0.895997	0.876362	0.890139	1.06878	1.06049	1.08086	1.07584	1.07049	1.0827	0.953012	0.952814	0.964456	0.98242	0.925304	0.968242	0.783011	0.748158	0.776778	1.59002	1.47902	1.50987
ARHGAP36	5					NA									4.85779						NA			NA			1.19778						2.22244			1.49875			17.9644									NA
ARHGAP39	54	0.750276	0.700362	0.733128	1.2811	1.25305	1.3382	0.784352	0.736393	0.752232	0.9856	1.00637	0.95049	0.94086	0.917895	0.969134	3.30935	4.08571	3.79166	0.803083	0.799255	0.821355	0.909392	0.901076	0.959396	0.582951	0.618597	0.544491	0.712744	0.60621	0.615701	0.595971	0.556817	0.584342	0.871403	0.852121	0.877003	0.795839	0.798883	0.818811	0.86343	0.818203	0.926912	0.889521	0.867914	0.863143	0.589687	0.514954	0.560126
ARHGAP4	27	0.552867	1.37849	1.0642				0.746675	1.80237	0.807345	0.736834	1.25412	0.98441				0.923353	1.68985	1.25988										0.841174	1.28419	0.987316										0.504445	1.19753	0.868631	0.938796	1.3133	1.18481
ARHGAP42	54	1.15889	1.27839	1.1874	0.925161	1.34008	1.25849	0.858228	0.79655	0.792419	1.58818	1.5859	1.64982	1.05596	0.998772	1.05598	0.618337	0.919462	1.03454	1.07084	1.2543	1.16469	0.846453	0.749528	1.05443	0.831708	1.05822	1.25942	0.930376	1.04686	0.858753	0.852069	0.915946	1.03529	0.60063	0.634187	0.854054	0.75615	0.53897	0.801723	0.536072	0.703098	0.703278	1.97274	2.04215	1.68126	0.769121	0.476825	0.831751
ARHGAP44	54	0.481618	0.592081	0.470953	1.18961	1.57652	1.45285	0.479407	0.500716	0.480352	0.444887	0.469562	0.490899	1.47601	1.87488	1.54353	0.157893	0.279669	0.268747	0.835259	0.675018	0.763057	0.753469	0.798918	0.792785	0.621126	0.702632	0.723911	0.511843	0.455387	0.575196	0.788914	0.773906	0.879969	0.62744	0.625553	0.725595	1.79458	2.25014	2.06716	2.32292	1.9193	2.22857	0.451786	0.574343	0.547434	2.4331	3.03988	2.76714
ARHGAP5	54	1.22632	1.2709	1.29755	0.8248	0.833716	0.85473	1.02864	1.04612	1.05766	1.02805	1.03106	1.07122	0.890823	0.921915	0.910166	0.91018	0.91916	0.929562	0.887371	0.871095	0.909587	1.08689	1.10546	1.10828	1.38164	1.43685	1.38916	1.30717	1.33716	1.31111	1.26422	1.26229	1.23812	1.16657	1.24274	1.19388	0.806258	0.720891	0.727439	0.695086	0.638348	0.698109	0.865893	0.841061	0.912329	1.09697	1.14401	1.09934
ARHGAP6	27				1.43321	2.1345	1.61528							5.92545	7.54381	4.06482				0.35759	0.627552	0.709485	0.544534	0.56154	0.801407	0.424888	0.724425	0.729171				0.763983	1.00674	0.907804	0.330685	0.517131	0.679332	0.464845	0.603414	0.690459							0.346898	0.420308	0.537597
ARHGDIA	54	0.884445	0.924021	0.935096	0.839173	0.867661	0.878484	0.867454	0.844431	0.844604	1.03756	1.07125	1.09593	0.818385	0.827846	0.813602	0.92329	0.90987	0.932983	0.709071	0.693369	0.706279	0.736916	0.773723	0.711869	0.943551	0.974485	0.962909	0.990155	0.991482	1.00076	0.833286	0.830195	0.808001	1.08935	1.08651	1.09673	1.12866	1.08249	1.16749	1.10645	1.08629	1.10616	1.88863	1.86962	1.84711	1.4271	1.40145	1.48953
ARHGDIB	54	0.530348	0.433593	0.415747	0.569301	0.643187	0.540702	0.667594	0.576955	0.627655	0.826106	0.661023	0.656586	2.50508	2.57843	2.39465	2.2204	2.44435	2.44505	0.452128	0.558514	0.507317	2.02892	2.17381	2.13395	1.24489	1.43595	1.33008	0.424934	0.28775	0.300968	2.43201	2.81353	2.50396	0.454775	0.468954	0.451933	0.448045	0.420552	0.494669	0.339059	0.208109	0.215364	0.319393	0.243427	0.255149	0.776587	0.862468	0.824931
ARHGEF1	27	0.915137				1.10188	0.831607	0.456619			0.911227				1.08357	1.08031	0.554385				0.954401	1.72806		0.826797	0.891813		4.13363	4.72494	1.78502				0.763941	0.630189		0.679317	0.658175		0.567833	0.484424	0.750003			0.533167				1.07513	0.945919
ARHGEF10	54	0.933085	0.922247	0.840821	2.57313	2.74891	2.89093	1.70651	1.63179	1.59496	1.14007	1.07246	1.15892	0.913931	0.954451	0.896717	0.818264	0.849351	0.809488	0.826737	0.775208	0.84814	0.790415	0.791217	0.75693	0.737293	0.71827	0.725325	1.01804	0.963628	1.01305	0.58957	0.60029	0.546939	0.823279	0.891377	0.88446	0.953249	0.973797	0.943318	0.871441	0.771345	0.833118	0.955878	0.985764	0.95566	0.422067	0.498626	0.367627
ARHGEF10L	54	0.720751	0.601316	0.687569	0.5056	0.579934	0.451713	0.56025	0.447965	0.42862	0.924978	0.909166	0.934284	1.67707	1.76621	1.81112	0.670865	0.615318	0.615227	0.78519	0.820365	0.771621	0.945839	0.889815	0.851048	0.713883	0.792647	0.698924	0.794474	0.880308	0.837767	2.9801	2.81456	3.24194	0.768574	0.803523	0.728711	1.21352	1.14866	1.15897	1.00828	1.06143	1.02776	0.686728	0.648938	0.682195	0.625304	0.636231	0.486459
ARHGEF11	54	0.928641	0.978885	1.01303	0.980018	0.874315	0.90586	0.881254	0.932199	0.919965	0.753152	0.815178	0.782223	1.21162	1.13529	1.15877	1.09394	1.06788	1.11329	1.5634	1.6102	1.62334	1.04695	0.968839	0.987855	0.997797	0.957636	0.963247	0.912647	0.982225	0.929788	0.861568	0.850661	0.779197	0.910619	0.88733	0.854943	0.973599	0.918751	0.885867	0.827363	0.8939	0.902555	0.899803	1.00098	0.968514	1.03935	1.0859	1.01165
ARHGEF12	54	1.39824	1.33772	1.31744	0.844918	0.935995	0.966906	1.02514	0.999915	1.02303	0.793977	0.769274	0.787434	1.24429	1.28041	1.30949	1.15498	1.07966	1.1248	1.09255	1.01362	1.16296	1.00252	0.976654	0.999554	0.899592	0.895444	0.932419	0.734551	0.719039	0.730402	0.99109	0.976528	0.984483	0.916301	0.900515	0.940482	0.855598	0.858002	0.873361	0.900392	0.836705	0.862866	1.07848	1.09578	1.10141	1.49115	1.40597	1.42832
ARHGEF16	54	1.08612	1.0767	1.09641	0.595093	0.524088	0.518284	0.565459	0.594025	0.625452	0.864208	0.903846	0.894633	1.09884	1.0626	1.01878	1.09766	1.01551	1.05618	0.663326	0.613354	0.597221	0.976797	0.982559	0.968345	0.948548	0.983149	0.963923	0.85477	0.895292	0.931375	1.49584	1.79212	1.62384	1.13934	1.29001	1.20015	1.47095	1.56048	1.61028	1.4868	1.53075	1.39338	0.457007	0.482254	0.495372	1.49863	1.59814	1.48228
ARHGEF17	54	1.17104	1.04666	1.14423	0.901243	0.841247	0.771412	0.96837	0.975965	0.970025	0.824751	0.827104	0.924697	1.32437	1.29178	1.25688	0.665989	0.674159	0.653929	1.02601	0.991201	1.03689	1.06043	0.941664	0.959837	0.758666	0.766121	0.761716	0.979762	0.959407	1.00399	0.884926	0.789348	0.825373	0.762911	0.750722	0.815731	0.813796	0.770097	0.79764	0.905825	0.911259	0.932998	1.59362	1.685	1.63997	1.00067	0.936699	1.02095
ARHGEF18	54	0.737197	0.720931	0.777051	0.794367	0.731034	0.641462	0.986344	0.954894	0.991688	1.29791	1.24082	1.43403	1.64168	1.31074	1.38457	1.27253	1.58515	0.99547	1.01782	1.22532	0.982561	1.46499	1.76126	1.44304	0.998432	0.854042	0.809561	0.806093	0.755935	0.902588	0.574518	0.499867	0.534246	0.775398	0.680232	0.657737	0.552843	0.533696	0.557622	0.537506	0.388919	0.524085	2.15103	1.4354	2.04769	0.917563	0.74959	0.660578
ARHGEF19	54	0.486363	0.503205	0.657397	0.715491	0.753651	0.868212	0.588346	0.380665	0.662225	0.696582	0.629629	0.786146	1.51091	1.81013	1.68317	0.596242	0.468828	0.776925	1.35836	1.40187	1.51487	0.845737	0.81524	0.822455	0.843558	0.835139	0.750315	1.11772	1.18692	1.02303	1.45896	1.69927	1.70711	1.12915	1.39285	1.32751	1.08476	1.19285	1.15925	1.0713	1.03118	1.07896	0.487391	0.642262	0.729021	0.651256	0.707098	0.57909
ARHGEF2	54	0.966946	0.950921	0.971197	1.46818	1.43109	1.49703	0.659465	0.654171	0.656757	1.38907	1.42448	1.34794	1.15095	1.1225	1.11746	0.643963	0.610326	0.648672	1.22524	1.1847	1.23316	1.14148	1.14885	1.14462	1.13641	1.14609	1.18817	1.22138	1.24338	1.2324	1.15108	1.10581	1.14762	0.773193	0.781056	0.795942	0.630458	0.663081	0.601091	0.557921	0.507034	0.533404	1.00825	1.02117	1.02262	0.888453	0.861461	0.871442
ARHGEF26	54	0.74678	0.47981	0.590199	0.682597	0.625934	0.748871	1.10799	1.22095	1.00128	0.673098	0.620693	0.590887	0.888062	0.929502	0.909849	1.05647	0.849206	1.02253	2.13974	2.22123	2.15265	0.594935	0.627531	0.74077	0.742121	0.637116	0.830813	0.746906	0.588135	0.711827	0.878935	0.900249	0.877362	1.24035	1.18189	1.22789	1.08582	0.894812	1.09555	1.08501	1.20312	1.18333	0.713644	0.538211	0.721373	1.53382	1.48133	1.4713
ARHGEF28	54	1.23397	1.11215	1.09454	1.38632	2.06753	1.61619	0.969179	0.929046	0.976641	1.51649	1.59253	1.57573	0.673396	0.584158	0.68735	0.742244	0.590911	0.782497	0.846053	0.861322	0.877165	1.1589	1.17543	1.16558	1.03324	0.992196	1.05681	0.985495	1.05778	0.964813	1.27164	1.2576	1.27885	1.11436	1.18776	1.09559	0.978045	0.956812	1.01293	0.840246	0.816247	0.88238	0.907541	0.916892	0.928323	0.653308	0.587071	0.639135
ARHGEF3	54	1.15529	0.850844	1.21431	0.776712	0.611034	0.662997	0.754419	0.660671	0.754518	1.4078	1.67469	1.35141	0.630268	0.669081	0.752604	0.88977	0.861928	1.18132	1.2211	1.28455	1.15626	1.22327	1.01126	1.06228	1.37339	1.14253	1.17797	0.860758	0.757635	0.941835	1.81433	1.90223	1.75278	0.789685	0.918851	0.824286	0.901239	0.996973	0.852974	0.961693	0.95013	1.00493	0.736727	0.6924	0.976624	1.22888	1.16732	1.2329
ARHGEF35	54	1.33737	1.96842	1.62443	0.535536	0.721796	0.768652	0.663522	0.530599	0.75326	0.626828	0.773554	0.618535	1.47154	0.826361	1.22617	0.810837	1.09005	1.14583	1.46167	1.26241	1.4423	1.15082	1.25851	1.20459	1.24795	1.28142	1.25052	0.59845	0.810308	0.706968	1.12211	1.15468	1.0327	0.794526	0.863583	0.811996	0.930708	0.894025	1.04409	0.829485	1.25109	1.30624	0.86761	0.412949	0.753861	0.971969	0.893618	1.07748
ARHGEF37	54	0.605901	0.604687	0.793263	0.53985	0.640744	0.621974	0.437404	0.652862	0.496556	1.12338	1.25944	1.15344	1.14121	1.15637	1.22985	2.83634	3.1502	2.72905	0.7506	0.861652	0.729729	1.33104	1.51324	1.29774	0.73837	0.711222	0.755624	0.757331	0.802065	0.786931	0.956969	0.998709	1.05964	0.493757	0.469033	0.42716	0.707454	0.631439	0.797953	0.508903	0.602862	0.634922	0.598433	0.590941	0.6994	0.658096	0.611469	0.656245
ARHGEF38	54	0.726442	0.551616	0.659432	0.615005	0.514808	0.959147	0.721421	0.681267	0.626163	0.655025	0.731198	0.621785	0.600031	0.542125	0.829368	1.82678	1.75893	1.57335	0.881543	0.600379	0.909848	1.0126	0.908327	0.947482	1.02193	1.14579	1.01862	0.752603	0.658283	0.665383	1.37527	1.51235	1.26705	1.09215	1.24982	1.15565	0.620616	0.545992	0.56286	0.57707	0.581728	0.568253	0.737672	0.653009	0.722754	1.80664	2.46941	1.82094
ARHGEF39	54	0.791106	1.00117	0.844565	0.907591	1.07972	0.960798	1.55122	1.51161	1.51917	0.973458	1.04274	0.871745	0.860242	0.875929	0.690631	0.576833	0.554358	0.64269	0.897997	0.848774	0.784841	1.14174	1.09123	1.01297	0.727551	0.903653	0.818172	0.789503	0.869938	0.722592	2.50645	2.28366	2.6076	0.746889	0.8389	0.843768	0.792457	0.766898	0.741345	0.677625	0.698352	0.769658	0.611592	0.67098	0.614929	1.03976	1.1067	1.03053
ARHGEF4	54	0.976798	1.13555	0.914819	0.311363	0.729465	0.685356	0.62464	0.691961	0.573845	1.36788	1.23716	1.3207	0.924809	0.909092	0.967291	0.617422	0.753228	0.459665	0.952996	0.918083	0.993074	1.48488	1.22147	1.41326	2.01864	1.27785	1.58833	0.733989	0.848154	0.641665	2.13142	1.36258	1.75445	0.656019	0.755214	0.678476	0.59811	0.749513	0.768579	0.735365	0.773901	0.901715	1.38145	1.10335	1.36857	1.23574	1.18932	1.25161
ARHGEF40	54	0.979258	1.10432	0.994751	1.16639	1.04164	1.11403	0.860085	0.867607	0.929326	0.744256	0.90578	0.816206	1.27636	1.31866	1.21249	0.834516	0.910804	0.863249	2.02215	1.92668	1.75045	0.886577	0.850283	0.988877	1.38999	1.38	1.35592	0.57572	0.612085	0.511688	1.00254	0.970895	1.04181	0.621399	0.501929	0.673634	0.595444	0.645669	0.6592	0.636391	0.673915	0.537791	2.4259	2.55055	2.39815	0.536478	0.492568	0.631468
ARHGEF5	54	1.39441	1.39159	1.30119	0.647518	0.698436	0.641696	0.787163	0.654415	0.761166	1.07979	1.05593	1.03759	1.44999	1.59917	1.47612	1.11118	1.09204	1.07275	1.4095	1.55966	1.36522	1.03787	1.06172	1.08852	1.12476	1.18272	1.15355	0.781384	0.738938	0.767322	1.14908	1.35997	1.3049	0.797062	0.834638	0.85529	0.947763	0.968798	0.992383	1.01279	0.970916	1.06848	0.644066	0.59374	0.630601	1.08009	1.08337	1.04095
ARHGEF6	54	0.565203	0.423197	0.406571	0.586313	0.377869	0.546466	0.578569	0.386837	0.496802	0.601414	0.597131	0.571041	0.660599	0.556143	0.618785	0.93783	0.939301	0.968227	3.51471	3.69879	4.10504	0.479224	0.492936	0.392501	0.541389	0.36538	0.538237	0.706117	0.75482	0.710889	0.476079	0.468094	0.600744	1.06207	1.0245	1.129	0.283257	0.277562	0.279804	0.595104	0.503203	0.49783	1.31841	1.55147	1.5808	0.971129	0.906786	1.04206
ARHGEF7	54	0.895362	0.949663	0.916295	0.99519	1.17589	1.07233	0.888271	0.949361	0.961205	1.15698	1.25907	1.17377	1.45362	1.50935	1.42267	0.952471	0.971107	0.981013	0.804756	0.827204	0.758108	0.930703	0.98682	0.960924	0.925808	1.00974	0.951516	0.907721	0.939451	0.959792	0.920318	0.918918	0.90828	0.908418	0.917288	0.860485	0.949245	0.90403	0.887207	0.852196	0.821352	0.842202	1.39922	1.45315	1.40669	1.33135	1.34543	1.34408
ARHGEF9	9				0.9078									1.11585						1.18874			1.01446			1.10844						1.02926			0.880303			0.769413									1.22407
ARID1A	54	1.07782	1.06333	1.07674	1.30668	1.2844	1.20543	0.501278	0.443854	0.429564	0.830947	0.791666	0.819748	1.31805	1.38138	1.23709	0.68593	0.632998	0.639743	1.21701	1.14902	1.20462	0.906671	0.856734	0.865471	1.23503	1.28742	1.23671	0.748424	0.706033	0.721827	1.56397	1.59773	1.50559	1.12148	1.12194	1.10233	1.15379	1.16442	1.11808	1.23013	1.31102	1.20938	1.01253	1.01552	1.02129	1.1326	1.13977	1.1114
ARID1B	54	1.07655	1.09416	1.07059	1.15158	1.1094	1.0479	0.87162	0.868908	0.89092	1.03259	1.09676	1.08764	1.29962	1.34206	1.30893	1.41812	1.43499	1.48768	0.998678	0.911437	0.970338	0.799198	0.79589	0.74133	0.981811	0.995131	0.976174	0.803029	0.747886	0.748793	1.08222	1.03675	1.07606	0.932624	0.957935	0.964912	0.862375	0.859139	0.864452	0.84366	0.834584	0.869659	0.688819	0.707411	0.738588	1.22246	1.22504	1.25187
ARID2	54	0.833192	0.807226	0.803416	0.83397	0.743668	0.800257	1.39215	1.41848	1.40436	0.832875	0.808886	0.780625	0.900292	0.831426	0.874295	1.03787	0.984661	1.02916	0.974675	0.899958	0.946142	0.826507	0.780296	0.802367	0.854706	0.871476	0.853739	0.71301	0.673181	0.66313	0.882233	0.830322	0.82773	1.52351	1.52656	1.54785	1.57018	1.45784	1.52021	1.53179	1.45268	1.55192	0.86232	0.856899	0.849035	1.15692	1.13643	1.08995
ARID3A	54	0.970543	0.848582	0.943639	0.528702	0.55137	0.639939	4.39001	5.30466	4.8291	0.988022	0.955569	1.15355	0.312839	0.427474	0.415853	1.04361	1.19426	1.11834	0.401857	0.525938	0.610843	0.509721	0.359174	0.483471	0.318667	0.344128	0.367593	0.545063	0.529453	0.661721	0.407588	0.458695	0.381542	0.550627	0.613854	0.557818	1.394	1.21141	1.12583	1.22089	1.27205	1.22924	0.687909	0.652606	0.677509	0.550176	0.490837	0.599415
ARID3B	36	0.98146	1.04348	0.974801	0.790296			3.35102	3.81703	4.93113	1.22618	1.20452	1.20685	0.804012			0.771564	0.79	0.815028	0.734758			0.75595			1.08637			0.778014	0.886528	0.799663	0.736245			0.807367			1.11085			0.929619	0.974738	1.08739	0.65904	0.756607	0.579647	0.808501
ARID3C	16		2.54262	0.791976					1.84591	0.698215		0.817436	0.358791					1.20175	0.929438											NA	0.808592											3.65213	1.32411		1.21702	0.857166
ARID4A	54	0.804228	0.781239	0.850513	1.06202	0.907492	0.870304	0.838343	0.898668	0.91073	0.922248	0.960404	0.978101	0.89304	0.86918	0.959401	0.607736	0.664368	0.729992	1.07393	1.06592	1.12674	0.840587	0.791854	0.808294	0.770292	0.767851	0.763039	0.996537	1.02141	1.00157	1.1237	1.15133	1.15854	1.50139	1.64182	1.51131	1.79271	1.89226	1.67532	1.7014	1.77036	1.58098	0.677741	0.664629	0.736671	0.832104	0.835945	0.926905
ARID4B	54	1.00175	0.999906	0.996474	1.03986	0.901799	0.955331	0.986574	1.04085	1.00051	0.863384	0.881198	0.861996	1.34336	1.28873	1.33994	0.900791	0.832755	0.852746	1.41338	1.37958	1.36395	1.03833	0.972004	1.04361	1.16853	1.07705	1.14104	0.87167	0.898329	0.890864	1.06208	1.02381	1.04772	0.966576	0.982865	1.00573	0.956067	0.911776	0.972121	1.05762	1.07236	1.09167	1.06892	1.12049	1.11452	0.882956	0.875555	0.871948
ARID5B	54	0.701092	0.687472	0.625985	1.04823	0.998363	1.09393	1.39767	1.46198	1.53459	1.20728	1.14271	1.27418	0.661079	0.532267	0.504884	0.633079	0.779715	0.612105	2.11975	2.19832	2.52064	0.76675	0.646507	0.616036	0.96059	0.790885	0.960259	0.828754	0.778889	0.834519	1.14687	0.955333	1.01968	0.800054	0.61657	0.705317	1.15976	1.00381	1.11656	1.08601	1.13732	1.04318	0.759747	0.748336	0.801311	0.983532	0.776661	0.882057
ARIH1	54	1.38245	1.40037	1.39939	0.910596	0.841378	0.943305	1.05298	1.087	1.07664	0.923353	0.847374	0.899682	1.12409	1.06478	1.13558	1.0703	1.12078	1.02599	1.21208	1.19958	1.24061	0.913334	0.776612	0.840437	0.979992	0.951616	0.998164	0.942196	0.874605	0.966846	0.777562	0.773012	0.821647	1.07068	1.11565	1.07467	1.14792	1.13303	1.1166	1.29925	1.173	1.35133	1.0238	0.976724	1.04364	0.913928	0.946374	0.970371
ARIH2	54	1.22764	1.19018	1.17792	1.16555	1.20362	1.26423	1.10241	1.10088	1.11753	1.24804	1.22518	1.20293	1.12139	1.07472	1.05238	1.06008	1.00744	0.956882	1.05724	1.15349	1.0865	1.16371	1.1812	1.15013	1.00194	0.957227	0.99334	0.881993	0.87873	0.872372	0.909142	0.950518	0.966755	0.905893	0.909628	0.849298	0.950453	0.87565	0.843336	0.943153	0.90095	0.901173	0.86033	0.862684	0.924522	1.10651	1.1133	1.01679
ARL1	54	1.01039	1.06053	1.08005	0.921705	0.886157	0.897306	0.754028	0.730621	0.679732	0.770004	0.712361	0.711797	0.644448	0.678266	0.697779	1.327	1.41615	1.25592	0.753953	0.826831	0.75856	0.792166	0.861936	0.851718	0.791946	0.801785	0.768289	0.932149	0.941215	0.936902	0.867984	0.85926	0.841069	0.98109	0.951648	0.949857	0.93448	0.930028	0.916736	1.00894	0.958775	0.895052	0.8823	0.85984	0.820823	0.964627	0.977431	1.01866
ARL10	45	0.630338	0.54716	0.504303	4.04305		3.86554	1.02947	1.06256	1.04613	2.12285	2.00731	2.18037	0.919168		0.973985	1.2634	1.50795	1.04048	0.738674		0.573311	1.05405		0.947774	0.610225		0.469856	0.948295	0.808035	0.919999	0.701704		0.410959	0.470789		0.437932	0.485257		0.367029	0.43554	0.542543	0.493047	1.49739	1.31167	1.43379	0.517647		0.377026
ARL13B	54	0.672013	0.65749	0.691246	1.01349	0.952739	1.13369	1.5015	1.4414	1.29984	1.45363	1.45934	1.3673	0.828813	0.734484	0.84321	0.753778	0.871114	0.863342	1.08167	1.04739	1.0431	0.876462	0.991212	0.953647	1.11459	1.08253	1.15877	0.828379	0.894538	0.941398	0.894801	0.923626	1.0853	1.22234	1.23922	1.27209	1.00619	1.07558	1.15264	1.11989	1.19366	1.10842	0.976927	1.17507	1.06107	0.678535	0.509846	0.55221
ARL14	9				0.184203									0.983402						0.545964			5.22356			1.17145						1.02871			0.524651			0.732384									0.687469
ARL14EP	54	0.968859	1.09347	0.95137	0.880891	0.889738	0.807213	1.03478	1.0917	1.1229	0.917033	0.965006	0.934025	1.26879	1.41826	1.47012	0.850199	1.03898	0.907328	1.02082	1.00193	1.01215	0.756386	0.882706	0.827241	0.794661	0.898169	0.849416	0.853532	0.846092	0.949627	0.813521	0.889951	0.76063	1.10646	1.28085	1.35314	1.06586	1.26324	1.23692	1.15324	1.19572	1.1559	0.754721	0.872585	0.915774	0.952321	1.02287	1.08116
ARL15	54	0.545456	0.529351	0.393461	1.90821	1.53294	1.80871	1.02377	1.21463	0.980402	0.630155	0.687096	0.52031	0.865655	0.709848	0.828351	0.810291	0.72785	0.706837	0.971574	0.87811	0.894887	0.793487	0.737869	0.683676	0.979453	0.812051	1.05909	1.07489	1.19296	1.09341	0.524285	0.387215	0.385482	1.62601	1.40303	1.73796	1.44811	1.71803	1.34819	1.59927	1.75376	1.70412	1.15207	1.4587	1.30173	1.13881	1.07738	1.406
ARL16	27		0.868257	0.681771		1.14479			1.25273	1.10762		1.34485	1.03982		0.996438			1.07936	0.976826		1.09546			0.849045			0.714691			1.33025	1.0368		0.97665			0.982942			1.04314			0.848544	0.707979		1.56518	1.57245		0.691182
ARL2	54	0.884452	0.964329	0.861501	0.987202	0.85431	1.01681	1.06782	1.03225	1.11101	1.31999	1.22113	1.2136	1.05088	0.843533	0.92285	0.659777	0.749415	0.728166	0.944996	0.899654	1.01066	0.803273	0.804906	0.876485	1.09147	1.04332	1.01621	0.933618	1.02741	0.931871	1.00722	0.81575	0.971306	1.08548	1.04952	0.968227	0.926873	0.917051	0.874394	0.718929	0.763638	0.731796	1.55067	1.50334	1.49264	0.955275	0.951438	0.855261
ARL2BP	54	0.812034	0.900135	1.04596	1.17548	1.27177	1.11307	1.64163	1.53533	1.44399	0.894375	0.799885	0.910829	0.860585	0.732082	0.642648	0.642497	0.626996	0.741166	0.726426	0.679953	0.47878	1.13721	1.43769	1.21317	1.0768	1.13119	1.08635	1.28145	1.43863	1.29295	0.944749	1.0257	0.972822	0.80932	0.804306	0.708638	0.732233	0.724414	0.685551	0.746722	0.768007	0.677761	1.25501	1.27699	1.17249	0.7661	0.766549	0.760919
ARL3	54	0.649434	0.567219	0.589707	1.15978	1.23342	1.26993	1.43857	1.44456	1.45525	0.796221	0.683612	0.765854	0.733834	0.78345	0.753072	1.07943	0.950171	1.03345	0.897348	0.881266	0.941622	0.468367	0.523822	0.430209	0.606092	0.622359	0.531738	0.62548	0.604072	0.672916	0.759013	0.816544	0.786862	1.13795	1.13164	1.13627	1.97842	1.79335	2.00232	1.75228	1.77213	1.72948	1.17999	1.17099	1.139	0.474505	0.509236	0.427938
ARL4A	27	1.08804	1.26844	1.19924				1.77037	1.62712	1.04872	0.960602	0.953849	0.81808				0.914398	0.823392	0.849323										1.05103	0.982801	0.935938										1.44424	1.70243	1.28074	1.38746	1.7858	1.47742
ARL4C	54	1.58709	1.7173	1.60761	1.02385	1.26817	1.28201	1.38448	1.34007	1.2803	2.79979	2.44395	2.15917	0.357064	0.289156	0.297613	0.775455	0.786959	0.761665	0.413222	0.280713	0.240836	0.637142	0.665876	0.647857	0.777707	0.688508	0.646791	2.47147	2.29512	2.08105	0.847028	0.689936	0.700451	0.349444	0.365974	0.350145	0.464363	0.424401	0.371244	0.469683	0.450467	0.514754	1.48619	1.41412	1.37705	0.324676	0.28346	0.258666
ARL4D	18			0.909706		0.895746				2.48343			1.16328		0.775549				0.976828		0.909021			0.765906			0.930262				0.726516		0.992318			0.8549			0.92109				1.54115			0.747905		0.849316
ARL5A	36	1.10654	1.29487		1.00526		0.683611	1.06934	1.07643		0.730555	0.785301		0.911034		0.956245	0.947863	1.13784		1.11485		1.36444	0.844263		0.684886	0.97154		0.89236	1.03715	1.10172		0.82157		0.73618	0.811844		0.958404	0.915962		0.823284	0.851856	0.939778		0.729918	0.797979		0.917701		1.4207
ARL5B	54	1.06542	1.18868	1.18184	0.98968	1.16905	0.989984	1.23409	1.32877	0.930009	1.01359	1.09379	0.809198	1.87884	1.6431	1.80346	0.811789	0.711997	0.686657	0.809162	0.687199	0.663754	0.791147	0.76522	0.63717	0.974922	1.02047	0.897759	1.17135	1.45476	1.21978	1.23208	1.08397	1.06977	1.13664	0.968998	0.783122	0.950666	0.892164	0.723852	1.10449	1.0732	0.947337	1.23495	1.36739	1.07276	0.909012	0.831567	0.684764
ARL6	54	0.949833	0.974134	1.20162	1.27565	1.41617	1.13981	1.09939	0.870356	0.836727	1.05287	0.958017	1.15647	0.774645	0.847334	0.811253	0.755086	0.777204	0.861827	1.67243	1.30463	1.42429	0.58637	0.549353	0.701148	1.0036	0.950728	0.893999	0.980354	1.00303	1.01345	0.892365	0.804413	0.954241	0.993119	0.838267	0.827306	0.92892	0.748487	0.849788	0.942195	0.763526	0.788743	0.926724	1.0722	1.10252	0.948752	0.824718	0.785148
ARL6IP4	54	0.795132	0.772494	0.765563	1.11369	1.09213	1.02426	1.28178	1.35998	1.37007	1.01952	1.01165	1.01097	0.962179	0.966609	0.944757	1.06483	1.03522	1.25237	1.21696	1.14533	1.11421	1.13735	1.0126	1.03602	0.948774	1.01298	0.973103	0.922306	0.959388	0.869998	1.00703	0.959258	1.01133	1.16344	1.11502	1.25035	1.24589	1.22641	1.29542	1.26251	1.1117	1.26377	1.03568	1.07752	1.01255	1.12364	1.16629	1.15495
ARL6IP5	54	1.55387	1.65922	1.51876	1.28771	1.10013	1.12577	0.589399	0.615714	0.662121	0.871603	0.88239	0.844776	1.15983	1.10541	1.09599	1.8471	1.87474	1.93769	1.16247	1.11536	1.08489	1.18331	1.22029	1.1306	1.00864	1.01258	1.01937	0.806322	0.807236	0.826562	1.26631	1.26723	1.23468	0.846889	0.850682	0.734353	0.863596	0.854989	0.76032	0.816454	0.863269	0.87974	0.674335	0.694771	0.730397	1.05437	1.06687	1.01875
ARL6IP6	54	0.92978	0.913993	0.944414	1.26937	1.06058	1.02528	1.03962	1.16602	1.20348	1.35239	1.50258	1.19618	1.23734	1.2546	1.13499	0.841023	0.760692	0.740876	1.22062	1.13385	0.987707	1.01149	0.928666	0.982785	0.747083	0.763984	0.857963	0.993075	1.06934	1.07485	1.41649	1.35812	1.08508	1.03342	0.912208	0.852963	1.07595	1.03034	0.979212	1.00927	0.927293	0.908073	0.922305	0.91688	0.968679	0.632645	0.711012	0.658218
ARL8A	54	0.826642	0.933561	0.808504	1.08629	1.05665	1.01918	0.602936	0.770178	0.63139	0.842306	0.999583	0.865149	1.60582	1.49737	1.4443	1.19833	1.19955	1.11775	1.1102	0.950347	1.01045	0.762347	0.837534	0.738596	0.96295	0.911422	0.899048	0.763925	0.941527	0.77271	1.08072	1.1145	1.07131	1.2554	1.14436	1.08292	1.21095	1.1184	1.00693	1.07357	1.03351	0.882588	1.11234	1.14754	1.10593	0.966467	1.14413	0.956715
ARL8B	54	1.03865	1.1717	1.12692	1.50476	1.32619	1.35014	0.715863	0.664893	0.691983	1.48573	1.70245	1.59708	0.898824	0.88071	0.795548	1.39042	1.38869	1.36389	0.952613	0.976236	0.84172	0.880013	0.893369	0.806054	0.749947	0.809833	0.752213	1.23567	1.4477	1.36665	0.8108	0.785192	0.773331	1.23966	1.24275	1.21771	0.968108	0.960777	0.868753	0.943663	0.991078	0.940388	1.10161	1.18999	1.09127	1.33641	1.30278	1.25833
ARMC1	54	0.851334	0.810917	0.915296	1.15503	1.18173	1.26164	0.897402	0.835259	0.95102	1.08535	0.952441	1.03013	1.0673	1.13111	1.11149	1.16391	1.01023	1.1841	1.432	1.44621	1.54435	0.864509	0.915371	0.951963	0.869123	0.960114	0.997068	1.13391	1.01901	1.04779	0.954645	1.01346	1.07791	0.974911	0.990305	1.12019	1.00749	0.944773	1.01253	1.05057	0.971526	1.0284	1.16941	1.07384	1.13961	1.01129	1.01967	1.08681
ARMC10	54	0.721275	0.716559	0.852865	0.983944	0.817715	0.822817	0.864112	0.865858	0.87997	0.804783	0.821355	0.849451	1.06355	0.938376	0.93315	0.952748	0.92581	0.977872	1.11444	1.14291	1.00805	0.747902	0.751991	0.72429	0.900974	0.854681	0.797465	0.716963	0.674751	0.714261	1.13038	1.16317	1.17219	1.22189	1.1007	1.08124	1.51471	1.62778	1.33343	1.39931	1.45919	1.59288	0.812693	0.756043	0.789167	1.40351	1.4172	1.1845
ARMC5	54	0.794127	1.04311	1.04172	0.991021	0.934902	0.842529	1.15723	1.14621	0.998057	1.13244	1.27161	1.14017	0.909801	1.15352	0.753258	0.822752	0.793376	0.798911	0.982052	0.942077	0.755606	1.13365	1.2088	1.18643	1.02663	0.821679	0.866146	0.728752	1.08418	1.14153	0.909807	0.824629	0.820852	1.06786	1.20792	1.17022	1.02707	0.972679	0.995857	1.0452	1.17002	1.09866	0.952655	1.21254	0.87924	0.999102	1.03609	0.871768
ARMC6	54	1.2768	1.15623	1.20855	1.25361	1.4688	1.28688	1.23096	1.2544	1.27981	1.08566	1.01815	1.0354	1.31201	1.53885	1.30174	0.955487	0.941517	1.0018	0.86243	0.818704	0.780624	0.968847	1.05449	0.977778	0.976066	1.10662	0.995882	0.888232	0.89128	0.927445	0.82376	0.845278	0.800472	1.15819	1.19381	1.15054	0.996788	1.10712	0.966385	1.18384	1.08699	1.12067	1.69515	1.54306	1.73982	0.746985	0.819312	0.772107
ARMC7	54	1.01508	0.975519	1.06355	0.736907	0.99293	0.877978	1.96012	1.66945	1.63622	1.2468	1.08661	1.20708	1.21209	1.58191	1.49766	0.895387	0.856302	0.901449	1.05003	1.15332	1.17315	0.706169	0.740394	0.873903	0.912959	0.671673	0.818405	0.673356	0.637805	0.678501	0.905451	1.0548	0.922929	1.29271	1.54528	1.31531	0.916024	1.04335	0.970562	1.10298	0.925238	1.14468	1.15182	1.03567	1.1785	1.22071	1.46306	1.25271
ARMC8	54	1.08165	1.08626	1.12734	0.731462	0.714379	0.765866	1.06202	0.990934	1.00901	0.902291	0.875216	0.879669	0.9211	0.831748	0.859058	0.925328	0.887555	0.922177	1.0022	0.952211	0.958199	1.05204	1.03527	1.03695	1.01226	1.0068	1.04941	1.35708	1.27008	1.30312	1.20416	1.17188	1.17657	1.05841	1.09695	1.06405	1.02519	1.00553	0.997825	1.08777	1.00872	0.989357	0.943316	0.93291	0.957967	0.777564	0.733657	0.678167
ARMC9	54	0.779844	0.703563	0.670241	1.07056	1.22938	1.26833	1.66798	1.80535	1.63732	0.762616	0.857234	0.810705	0.56978	0.517655	0.698605	1.32969	1.29291	1.32107	0.766593	0.852736	0.965114	0.766127	0.668078	0.595307	0.640421	0.606381	0.713387	0.977938	0.972335	0.971909	0.673093	0.672114	0.764574	0.904498	0.811472	0.8802	1.4011	1.42609	1.32691	1.48007	1.56606	1.46097	1.67955	1.76054	1.7237	1.13498	1.11932	1.12253
ARMCX1	54	0.285697	0.456856	0.536682	2.41929	2.86326	2.52875	0.954243	0.922745	0.894976	0.325429	0.405451	0.500195	0.984391	0.917078	0.93006	0.304232	0.556223	0.625808	0.589188	0.441408	0.473613	0.526493	0.421929	0.537949	0.49705	0.337314	0.500045	2.64314	2.06699	2.03284	0.783658	0.633976	0.769402	0.464982	0.393322	0.431145	2.43183	3.41798	3.0804	2.41574	1.93217	1.88318	0.403078	0.492198	0.610309	0.633427	0.470184	0.356737
ARMCX2	54	0.738601	0.408962	0.709521	1.9335	1.57117	1.81992	0.920219	0.943605	1.00496	0.82614	0.460935	0.890538	0.721251	0.683762	0.660554	0.598874	0.595492	0.443921	1.34483	1.26135	1.1106	0.630214	0.602146	0.381707	0.538301	0.498235	0.442082	1.98979	2.02446	1.86507	0.667523	0.837782	0.544087	0.556256	0.680346	0.514641	2.27287	2.62898	1.85846	1.59516	1.86862	1.61991	0.513981	0.324396	0.653664	0.538466	0.46873	0.46952
ARMCX3	54	0.849658	0.750247	0.802391	1.07648	0.927551	1.01192	0.742795	0.699252	0.719381	1.02298	1.04417	1.04521	1.16829	1.11987	1.17772	1.96461	1.77923	2.02896	0.988747	0.910534	0.940947	0.874236	0.858963	0.846026	0.966245	0.955688	0.873947	1.06248	1.08639	1.11802	0.877977	0.837856	0.846924	0.967948	1.02695	1.00359	1.20332	1.25305	1.17247	1.16302	1.12231	1.22828	0.9083	0.868764	0.903116	0.374072	0.260683	0.266716
ARMCX4	27	0.931999	1.04402	0.745132				0.711295	1.0624	1.02791	0.979097	1.25838	1.03909				1.01096	1.21052	0.812313										1.39498	1.25319	1.09873										1.17159	0.938996	1.36275	0.959227	1.11193	0.806173
ARMCX5	54	0.891456	0.713942	0.870223	0.815254	0.791002	0.790878	1.13844	1.11434	1.07886	1.06128	1.00455	1.056	1.21623	1.15219	1.1811	0.954848	1.06815	0.951167	0.870426	0.853316	0.968341	0.889179	0.800483	0.924942	0.930467	0.964923	1.01135	1.17547	1.17185	1.06711	0.9806	0.956078	0.982566	0.950189	0.950428	1.09892	1.01167	0.992831	1.12538	1.11704	1.17137	1.23265	0.925155	0.738146	1.10303	0.975364	1.00041	0.975153
ARMCX6	27				1.8319	1.76427	1.44576							0.987272	1.56529	0.938986				1.53116	1.74282	1.14141	0.833505	1.06058	0.864774	0.738582	1.01082	0.579189				1.20552	1.35622	1.19935	0.939056	0.933074	0.97717	3.05623	2.60701	2.80949							0.666497	0.644988	0.518885
ARNT	54	0.781589	0.862938	0.757288	1.172	1.1555	1.12936	0.911749	0.956978	0.892023	0.984242	1.06856	0.941667	1.45869	1.66213	1.45438	0.63871	0.569891	0.555666	0.966085	0.901855	0.935804	0.667753	0.599131	0.637032	0.778714	0.849952	0.77849	0.960675	0.931677	0.938242	1.07998	1.13707	1.09484	1.24428	1.36369	1.27261	1.23723	1.30294	1.22153	1.31275	1.31578	1.224	0.890848	0.931665	0.858445	0.998657	1.00864	0.943429
ARNT2	45	0.943029	0.861831	1.07856	0.968468	0.662357		1.40804	1.87545	1.91086	1.29347	1.18336	0.994787	0.954486	0.796115		1.27794	0.994341	0.931544	1.66236	1.48587		0.831629	0.924055		0.744148	0.90458		0.854796	1.0878	1.0257	0.926867	1.09689		0.965282	0.885684		1.06239	1.54814		1.23639	1.01749	1.04838	0.859434	1.00772	0.897447	0.825187	0.935087
ARNTL	54	1.06443	1.0432	1.09058	0.97803	1.03972	1.19829	0.963755	0.760218	0.896286	1.0698	1.03083	1.31525	1.25267	1.18827	1.19792	1.42735	1.44805	1.47827	1.06843	1.19619	1.14008	0.711161	0.8713	0.896325	1.00909	0.832894	0.958351	0.912586	0.86742	0.902355	1.22358	1.21706	1.2868	1.0891	0.905473	0.955284	0.861124	0.839387	0.76574	0.928023	0.905741	1.08667	1.02607	0.869814	0.955436	0.93492	0.827986	0.945723
ARPC1A	54	1.0092	1.08233	1.03789	0.761788	0.850352	0.7849	0.949234	1.00441	0.985766	2.30375	2.30085	1.9746	1.00538	1.06887	1.04651	1.5594	1.49717	1.44338	0.636525	0.708422	0.602938	0.789217	0.844742	0.78336	0.762115	0.795584	0.707637	1.29524	1.28289	1.23023	0.817241	0.818313	0.788506	0.870212	0.89552	0.841433	1.01606	1.08362	0.968018	0.910852	0.934629	0.980276	0.940082	0.948118	0.995627	0.736414	0.752859	0.632958
ARPC1B	54	1.2584	1.29187	1.21237	1.03708	1.0372	1.00741	0.894233	0.911931	0.898434	0.667683	0.57681	0.701443	1.09526	1.03029	1.03096	0.630765	0.620329	0.637057	1.07762	1.03204	1.06108	1.08846	1.0518	1.07405	1.26628	1.201	1.2022	1.08694	1.01081	1.04166	1.3966	1.30682	1.34907	0.94499	0.956299	0.928145	1.02587	1.01476	1.0216	1.02476	1.03938	1.01173	1.36615	1.30949	1.2479	1.22709	1.20146	1.15519
ARPC2	54	1.19349	1.22948	1.21971	0.943834	1.02086	0.968059	0.879764	0.864403	0.868576	1.16984	1.14561	1.15406	0.981269	1.03333	0.963413	0.843625	0.870738	0.858069	0.912633	0.927729	0.881603	0.942945	0.958067	0.940629	1.07866	1.10448	1.081	1.17086	1.17548	1.15331	1.17122	1.1703	1.12611	0.896365	0.891864	0.874218	1.00294	1.01454	0.96156	0.933485	0.930367	0.912762	1.20171	1.20985	1.19173	1.06237	1.05466	1.05126
ARPC3	54	1.23162	1.3152	1.20846	0.916914	0.988705	1.00103	0.876925	0.873172	0.825677	1.17018	1.23263	1.14687	0.994589	0.99111	0.949096	0.857668	0.794672	0.801799	0.896113	0.942519	0.887048	0.890182	0.966244	0.924368	1.07428	1.08334	1.05305	1.18155	1.16195	1.16702	1.17205	1.1644	1.15387	0.840854	0.935907	0.838169	0.878049	0.958358	0.876842	0.899007	0.913496	0.849161	1.20209	1.26191	1.22694	0.971203	1.04336	0.96626
ARPC5	54	1.19456	1.21383	1.1731	1.02002	1.04403	1.05654	1.00378	0.934235	0.978217	1.21669	1.25622	1.19252	1.02699	1.02615	0.985144	0.726473	0.688306	0.718056	0.975715	0.970884	0.960365	0.982213	0.974864	0.938694	1.03228	1.06913	1.01189	1.14623	1.0875	1.07598	1.25169	1.20033	1.18512	0.988926	1.01166	0.951404	0.997016	0.96722	0.987534	0.995709	0.911694	0.966253	1.26265	1.27229	1.24384	1.10547	1.12567	1.09958
ARPC5L	54	1.17256	1.14967	1.07285	0.836454	0.899407	0.922835	0.907705	0.979291	0.978016	1.13792	1.14024	1.09662	1.19559	1.28526	1.28874	1.13243	1.22532	1.16476	0.911261	0.882507	0.848957	1.10542	1.08717	1.20079	1.31472	1.26305	1.24024	1.2281	1.3355	1.17862	1.09787	1.18196	0.990244	0.925741	0.931055	0.973294	1.1536	1.20233	1.19949	1.25416	1.17257	1.10589	0.949371	1.05517	0.935455	0.946658	1.00331	0.98366
ARPP19	54	0.905038	1.02557	0.894976	0.946302	1.03399	0.94071	1.26326	1.33465	1.18093	0.956107	1.06983	0.941851	1.07025	0.972353	0.87322	1.02587	1.11111	1.07568	1.05756	0.957022	0.856628	0.883759	0.882523	0.919241	1.06119	1.03763	0.968424	0.82661	0.759767	0.749503	1.0115	1.09587	0.918554	1.46357	1.40497	1.34341	1.43569	1.49283	1.38929	1.61067	1.62788	1.57651	0.900284	0.966929	0.981545	0.95497	0.943823	0.913403
ARR3	54	1.05413	0.568739	0.833058	0.462064	0.81796	0.404759	0.676784	0.649851	0.772104	1.02889	0.862824	0.791716	2.24966	2.21591	1.2031	1.25752	1.21378	1.21781	1.10105	1.18918	0.732467	1.65185	0.863978	0.473261	0.528233	0.707199	0.519198	1.03055	0.725835	0.579269	1.05397	1.34054	0.729649	0.426902	0.725145	0.559895	0.669892	0.762657	0.700987	1.14696	0.844166	0.728323	0.884447	0.820175	0.959146	1.21343	1.2744	1.27981
ARRB1	54	0.742866	0.695984	0.718257	0.477348	0.469894	0.329059	0.499498	0.415947	0.453339	0.784728	0.698156	0.741773	2.16811	2.27169	2.41691	1.67797	1.5471	1.69049	1.06194	1.18408	1.1367	0.794161	0.793748	0.816669	0.659045	0.680067	0.627226	0.565825	0.512884	0.53376	1.22181	1.24318	1.22571	0.701362	0.77418	0.654174	0.812956	0.900338	0.866843	0.90814	0.901613	0.873156	1.05204	1.06293	0.964124	1.2577	1.45451	1.45501
ARRB2	54	1.09742	1.17268	1.03126	1.24881	1.15815	1.38024	1.11732	1.2258	1.14905	1.11913	1.17223	1.0387	0.999806	1.14998	1.08334	1.09755	1.02051	0.95301	0.887261	0.860062	0.863868	0.812204	0.692376	0.778276	0.978675	1.07164	1.0421	0.861665	0.852347	0.791546	0.77929	0.769544	0.740511	0.958244	1.01121	0.918096	0.947137	0.937483	0.969933	0.87088	0.900023	0.901462	1.06636	1.18708	1.08817	1.18273	1.42095	1.3332
ARRDC1	54	1.17803	1.12352	1.48267	0.590112	0.607973	0.49767	0.738815	0.770155	0.716362	0.844178	0.90962	0.878215	0.619853	0.739898	0.690181	1.8965	1.6127	1.76709	0.4236	0.461726	0.498521	0.769368	0.826923	0.753688	0.913689	1.00107	0.916441	0.681511	0.71976	0.669728	0.728475	0.747694	0.677293	1.16933	1.18365	1.0818	1.36491	1.27691	1.36138	1.09861	1.16552	1.01573	0.589097	0.580951	0.56916	1.74911	1.63174	1.62237
ARRDC3	53	0.833597	0.187095	0.501296	10.9824	5.66219	4.76845	0.546052	1.26803	0.890377	0.399026	0.176823	0.302976	0.511317	0.655533	0.771338	0.398468	NA	0.313299	0.631373	0.613622	0.891341	0.536014	0.690666	0.778055	0.698721	0.735596	0.88036	0.752569	0.284159	0.291389	0.465102	0.614717	0.712009	0.507278	0.715784	0.593008	0.788563	0.896033	0.892186	0.505898	0.904459	0.491671	0.40076	0.317443	0.370504	0.358055	0.620539	0.557069
ARSA	54	0.670155	0.536972	0.604976	0.92038	0.601871	0.694342	0.725808	0.658952	0.626516	0.702948	0.706292	0.763108	0.770955	0.775485	0.791546	1.23503	1.26866	0.997284	2.91083	1.92003	3.57924	0.888815	0.767463	0.736975	0.597147	0.64572	0.580197	1.06484	1.11518	1.06475	1.06766	0.989218	1.14337	0.967551	0.900007	0.978768	0.484783	0.693319	0.58036	0.733233	0.540115	0.700241	1.05974	1.05017	1.103	0.850292	0.795776	0.796954
ARSB	54	0.697377	0.788869	0.888666	1.05264	0.903423	1.03756	1.45011	1.52593	1.37818	1.06141	0.985907	1.03693	1.24105	1.13627	1.17596	1.07921	1.20339	1.2015	1.50877	1.48056	1.43424	0.848103	0.768778	0.755741	1.05436	0.92159	1.1023	0.957394	0.817526	0.999873	0.73806	0.700614	0.766602	1.00708	0.783166	0.918638	0.980575	0.784257	0.810673	0.975795	0.799906	0.776259	1.08944	0.961336	1.20401	0.694849	0.643255	0.728887
ARSD	54	0.847064	0.838731	0.879547	1.09315	0.877048	0.797605	1.02097	1.15821	1.02338	0.654071	0.618812	0.786057	0.973279	0.869655	0.872292	1.06144	1.13793	0.97125	1.03332	0.766196	0.827691	1.11519	0.780349	0.821568	0.909117	0.755199	0.802077	0.794523	0.884998	0.95533	1.33237	1.19868	1.18477	0.868977	0.706119	0.782801	1.36438	1.67471	1.53174	1.33068	1.88219	1.54943	1.14156	1.65813	1.26212	0.958878	0.829362	0.767011
ARSE	27	1.13182	0.699645	0.853395				1.98934	1.91449	2.04917	2.11338	2.14571	1.20289				0.98383	0.655924	0.920237										1.19375	0.895955	0.816223										1.11394	0.793871	0.809861	1.20467	0.800656	0.83345
ARSJ	27			0.407249	4.06646	3.47142				0.764977			1.32791	0.308435	0.339973				0.512505	1.21573	0.85031		1.00092	0.773132		0.887604	0.888139				1.85552	1.02661	0.976084		0.305796	0.394007		0.314497	0.379379				0.473			3.74383	0.478442	0.51975
ARSK	18				0.925728		0.928375							1.1711		1.1602				1.76413		1.50919	0.815727		0.817785	1.50831		0.969156				1.14335		0.8397	1.55473		1.15603	1.26414		1.5788							1.20584		0.993073
ART3	54	0.325935	0.231915	0.199574	0.790714	0.587492	0.663523	0.365944	0.137103	0.202406	3.64319	3.67097	3.34465	0.484652	0.568866	0.343451	0.281116	0.158837	0.206366	4.90445	5.37462	7.15904	0.570466	0.584103	0.421621	0.758146	0.546442	0.788531	0.504949	0.530019	0.320916	1.13162	1.0043	1.2193	0.435123	0.400582	0.313926	0.443533	0.529234	0.338641	0.335422	0.231557	0.210652	0.304117	0.228237	0.256472	0.548032	0.524184	0.28241
ARV1	54	0.696959	0.55767	0.77043	0.970166	0.837259	1.23121	0.878304	0.797417	0.927937	0.646776	0.367405	0.496849	1.07866	1.03532	0.935428	1.46774	1.39064	1.58596	1.01699	0.873505	0.831038	1.10402	1.14956	1.07507	0.715961	0.647866	0.918938	1.17254	1.2984	1.13303	0.967729	0.931097	1.10533	1.05155	0.962667	0.927532	1.0207	0.876814	0.937709	1.09928	0.999889	0.983937	1.19618	1.31033	1.20615	0.888874	0.941407	0.861825
ARVCF	54	0.748939	0.767439	0.755563	0.934253	1.0263	0.823636	0.874922	0.97889	0.957634	1.10765	1.1976	1.18055	1.45564	1.50785	1.38911	1.28151	1.26214	1.27606	0.833024	0.910485	0.840088	1.11734	1.02916	1.07566	0.867097	0.916272	0.902483	0.902258	1.01759	1.04255	1.39959	1.3023	1.34672	0.981568	1.05693	0.968143	1.12651	1.06164	1.09068	1.02818	1.2105	1.18376	0.646871	0.70412	0.723861	0.638537	0.717111	0.700753
AS3MT	54	0.609449	0.549962	0.507593	0.562893	0.589536	0.548134	1.32532	1.37907	1.26778	0.832218	0.748548	0.762767	1.47075	1.53621	1.57977	0.545818	0.459499	0.419791	1.75921	1.77332	1.85683	0.799755	0.778919	0.789381	0.366377	0.374428	0.29086	1.44667	1.57428	1.46497	0.312833	0.381119	0.299126	0.274063	0.360799	0.31603	0.389922	0.445037	0.404531	0.688215	0.514999	0.551647	1.91396	2.07101	2.03017	0.300366	0.38082	0.298821
ASAH1	54	0.94551	0.844264	0.857274	0.42008	0.43572	0.394015	0.723822	0.684909	0.748256	0.764978	0.651927	0.748123	1.22628	1.36761	1.23602	3.35039	3.46967	3.53157	0.461819	0.428843	0.350931	0.579871	0.505599	0.537049	0.923007	0.906954	0.839055	0.763394	0.641716	0.711616	0.550832	0.539037	0.478028	1.00073	1.04004	0.995818	0.947673	0.966769	0.94678	0.769396	0.737542	0.742395	0.666882	0.645586	0.715416	1.51673	1.59768	1.53086
ASAP1	54	1.31886	1.30702	1.21084	1.4011	1.44497	1.47913	0.72613	0.675633	0.729604	1.05439	1.05538	0.999392	0.88242	0.827352	0.898763	1.12209	1.11772	1.06572	1.56838	1.54611	1.61493	1.11232	1.06255	1.11966	0.642052	0.619548	0.653523	1.07523	1.0393	1.03692	0.840645	0.867827	0.869042	0.569631	0.542842	0.562839	0.685684	0.692861	0.721109	1.04292	1.07398	1.04416	2.18846	2.11719	2.03612	0.750066	0.762122	0.746842
ASAP2	54	1.08006	1.12974	1.04557	0.75348	0.804894	0.750999	0.962073	0.892202	0.95712	1.06917	1.07979	1.121	0.865063	0.860876	0.869529	1.62144	1.65712	1.64782	0.870152	0.892177	0.878335	1.01117	0.979984	1.02951	0.900801	0.941226	0.93164	0.66857	0.717892	0.671132	1.12585	1.0422	0.989705	0.93749	0.934953	0.878586	1.40162	1.47429	1.47172	1.25377	1.39964	1.32675	0.957243	1.0089	0.941817	0.946399	0.908065	0.888279
ASAP3	54	0.771977	0.674265	0.612529	0.724859	0.832462	0.551011	0.707977	0.593053	0.617832	0.767782	0.803829	0.640562	1.06731	1.05817	1.06499	1.4372	1.48876	1.18595	0.832563	0.900719	0.77766	0.93146	1.09192	0.966797	0.680496	0.705725	0.56651	0.814307	0.67625	0.687256	2.35901	2.52903	2.67428	0.904283	0.984558	0.846812	0.847338	0.835607	0.826112	0.692743	0.652368	0.611789	1.52436	1.70493	1.49918	0.837942	0.88789	0.751564
ASB1	54	1.176	1.41001	1.28214	0.931327	0.945769	1.00097	0.923423	0.974145	0.943558	1.12763	0.956576	1.19027	0.830913	0.778926	0.856974	0.903685	1.05998	0.990909	0.886028	0.869322	1.02745	0.873092	0.775239	0.837366	0.855018	0.826406	0.863353	1.11881	1.28811	1.4447	0.882795	0.721166	0.820535	1.20456	1.04658	1.16127	1.14728	0.960491	0.974573	1.07875	0.911935	1.01546	1.0777	1.41801	1.49861	1.03631	0.700948	0.673586
ASB13	54	0.438533	0.477273	0.77551	0.89738	0.787076	0.88311	0.558657	0.733821	0.900236	0.701994	1.26101	1.43281	0.76881	0.798678	0.971384	0.90726	1.03576	1.43074	0.807303	0.920609	1.0328	0.975331	0.987432	0.960035	0.616599	0.703254	0.820469	1.09839	1.20592	1.12926	0.990665	0.931151	1.18724	1.59137	1.28036	1.73665	2.34708	1.84701	2.14713	0.955738	1.24968	1.2669	0.7322	0.992693	1.04015	0.849646	0.738642	1.10844
ASB6	54	0.949571	0.899803	0.874594	1.39738	1.58058	1.40029	0.927301	1.02872	0.948682	0.992729	0.958101	0.959026	1.04581	1.05967	1.10995	0.755624	0.869215	0.710838	0.878307	0.896305	0.867751	1.03772	1.0971	1.10385	1.08502	1.18753	1.07113	0.886524	0.980238	0.946081	0.662271	0.586087	0.758211	1.1871	1.16944	1.11068	1.02637	1.11029	1.06278	1.0005	1.03531	0.960076	0.898688	0.909185	0.90955	0.943769	0.872186	0.848343
ASB7	54	0.818299	0.864891	0.751319	1.11804	0.963367	1.09827	0.769535	0.746613	0.694555	1.08306	1.09878	1.02274	0.924711	0.891736	0.942314	1.43325	1.4472	1.49398	0.943974	0.936278	0.879313	0.998479	0.944947	1.05006	0.925647	0.787456	0.939646	1.03509	1.02515	1.02149	1.02254	0.937587	0.983215	0.970735	1.03458	0.96557	0.85152	1.09168	1.09136	1.15837	1.36702	1.23828	0.771876	0.893568	0.772568	0.835994	0.708055	0.855937
ASB8	54	0.988441	0.776769	0.836573	0.926013	1.06506	0.719582	0.969044	1.08964	0.975386	0.96591	0.907507	0.759013	0.982829	0.99042	1.07222	0.918039	1.29465	1.36652	0.753492	0.769887	0.823657	1.06528	1.03857	0.961083	0.893836	1.05682	0.893187	0.955513	0.877228	0.937542	0.779051	0.897679	0.823201	1.49884	1.61356	1.57155	1.0182	1.12224	1.2169	1.17762	0.884674	1.04262	0.859976	0.800419	0.935711	1.16549	1.24292	1.06157
ASB9	54	0.957474	0.879162	0.935451	0.884169	0.863239	1.08382	1.39223	1.25789	1.44667	0.871173	0.920315	0.960333	0.771715	0.853964	0.681757	0.739599	0.68398	0.797704	1.55901	1.69595	1.34939	1.01978	1.12594	0.99161	1.15261	0.979585	1.01234	0.924594	0.831409	0.94342	0.901675	0.848253	1.19907	0.684199	0.643411	0.992983	0.89175	0.911561	1.22628	0.896897	0.953741	0.876105	1.16985	1.20827	1.09853	0.827028	0.706718	0.979816
ASCC1	54	1.19358	1.14338	1.22802	1.0419	1.0823	1.1752	1.0103	0.969794	1.03991	0.958067	0.954421	1.02616	0.867493	0.872521	0.832732	1.25474	1.10828	1.13196	0.833433	0.884043	0.830301	1.03619	1.05191	1.17503	0.980499	1.02141	1.04469	0.985788	0.94961	0.984282	1.04524	1.12988	1.08611	1.01791	1.07852	1.08995	0.944228	0.998068	0.962625	1.09265	1.03309	0.985201	0.991698	0.919329	1.00334	1.04556	1.16807	1.15149
ASCC2	54	1.30834	1.31909	1.28321	1.01918	1.08261	1.07809	0.977498	0.977992	1.03046	0.939642	0.927727	0.854336	0.753523	0.679539	0.758351	1.27571	1.23983	1.25328	0.949636	0.940595	0.852839	1.06319	1.1218	1.13443	1.25234	1.29051	1.2696	0.96438	0.956067	0.914923	1.12568	1.21386	1.15221	1.09603	1.18965	1.0654	1.0306	1.03815	0.974839	1.06276	1.17689	1.0586	0.948802	0.93559	0.91415	1.0199	1.04221	1.03742
ASCC3	54	1.31173	1.33018	1.35084	1.03386	1.06972	1.05857	1.03951	1.04298	1.02812	0.845885	0.815966	0.813853	0.666868	0.659043	0.65911	1.30651	1.24757	1.26907	0.858653	0.834208	0.86806	1.13858	1.16633	1.20668	1.24413	1.29532	1.27426	0.92814	0.943996	0.929609	1.15099	1.1376	1.14498	1.0765	1.0906	1.08718	0.984727	0.973768	1.0075	1.11117	1.07317	1.05299	0.894635	0.875358	0.892654	1.11438	1.14387	1.13523
ASCL2	9			0.780179						0.812862			1.60552						5.43656												0.678619												1.4963			0.564729
ASF1A	54	1.12759	1.08543	1.06253	1.148	1.1651	1.08979	1.23768	1.46048	1.27899	0.920054	0.859548	0.880212	1.52885	1.6326	1.44835	0.940308	0.950528	0.977399	0.919111	0.751385	0.775949	0.885652	0.925881	0.961126	1.07489	1.3153	1.13795	0.825844	0.732489	0.816264	1.01927	1.09152	0.984894	1.19024	1.36888	1.38378	1.04913	1.15773	1.1174	1.24217	1.30996	1.37504	0.712088	0.757808	0.729927	0.890347	1.15017	0.884383
ASF1B	54	0.603393	0.69929	0.718894	0.716611	0.892181	0.643538	0.786802	0.889167	0.831722	0.657659	0.675572	0.760428	1.32095	1.21421	1.25359	0.410206	0.534602	0.573927	0.933964	0.846962	0.821611	1.00709	1.03003	1.036	0.894437	1.00263	0.857391	0.901511	0.815358	1.11199	1.53805	1.56087	1.69845	1.19863	1.18772	1.17364	1.35711	1.31915	1.30578	1.60628	1.47712	1.67151	0.963644	0.96569	1.12983	0.675879	0.751629	0.671134
ASH1L	54	1.05735	1.02857	1.0167	1.04792	0.984774	0.999903	0.805963	0.829074	0.797523	1.10919	1.17738	1.08241	1.02023	0.979187	1.0446	0.970938	0.923192	0.959236	1.13893	1.17518	1.24892	0.915257	0.822592	0.900155	1.07991	1.04774	1.00926	0.876924	0.913008	0.807723	1.07696	1.06443	1.08413	1.18374	1.18774	1.17847	0.990554	1.02802	1.0164	1.0155	1.06497	0.971191	0.954053	0.958327	0.914821	1.2346	1.0953	1.1755
ASH2L	54	1.02693	0.998415	1.03267	1.0021	0.934715	0.959512	1.1686	1.22057	1.08735	0.948792	0.990252	0.930017	1.15997	1.12203	1.13551	1.02496	0.999491	1.01051	1.43254	1.42347	1.502	0.852216	0.836398	0.819946	0.840183	0.834874	0.84039	1.227	1.17812	1.18041	0.841324	0.808841	0.853592	1.1433	1.10247	1.20953	1.17354	1.12878	1.20644	1.1635	1.16248	1.08589	1.12201	1.18078	1.06061	0.815389	0.733452	0.845636
ASIC1	27	0.521953	0.878079	0.635853				0.588634	0.847817	0.602996	0.657123	0.947625	0.919386				0.957322	1.88847	0.759707										0.796033	0.9111	0.820857										0.783409	1.2783	0.895997	0.989161	1.70411	1.2202
ASL	54	1.04813	1.03206	0.990681	0.674042	0.675568	0.734737	0.807893	0.728564	0.615935	0.975245	0.924829	1.00746	0.623813	0.672159	0.751632	1.66268	1.61452	1.85781	1.1151	1.23898	1.12152	0.775593	0.79102	0.784062	0.900896	0.876301	0.959377	0.831504	0.810224	0.841937	1.60629	1.76267	1.67954	0.748941	0.783787	0.774338	1.02329	1.11025	1.03985	1.05228	1.1261	1.14117	1.0024	0.99431	1.03046	1.23029	1.35382	1.28177
ASMTL	54	0.648695	0.611958	0.638178	1.12942	1.17459	1.2047	1.32931	1.35575	1.38843	0.827573	0.749507	0.814186	0.54543	0.535797	0.564944	0.882859	0.715294	0.761109	0.657058	0.634954	0.604868	1.24369	1.21352	1.24436	1.07985	1.03284	1.06583	0.635925	0.555304	0.618748	0.757484	0.711423	0.680362	1.78032	1.75822	1.67369	1.90633	1.79493	1.87846	1.66743	1.6841	1.60875	1.31567	1.38375	1.31396	1.13784	1.09703	1.12236
ASNA1	54	0.985726	1.08632	0.948316	0.878033	0.906799	0.883852	0.823277	0.821098	0.814403	0.927144	0.891605	0.926618	1.05352	1.06757	1.03544	1.36914	1.29211	1.38381	0.84897	0.852055	0.790015	1.02027	1.14834	1.04366	0.944925	0.950532	0.918857	0.902208	0.909193	0.895741	1.13008	1.25526	1.14216	1.15084	1.23475	1.09725	1.15292	1.20784	1.10072	1.06533	1.11843	1.10913	1.17425	1.21541	1.19038	0.712101	0.708729	0.744525
ASNS	54	0.700884	0.695694	0.732746	0.819566	0.94042	0.91288	1.02526	1.02998	1.01304	1.02052	1.05918	1.00556	1.55441	1.56217	1.51303	0.981147	0.955477	0.970124	0.79167	0.846163	0.840284	0.803861	0.827267	0.866892	0.733492	0.768632	0.767225	0.755279	0.769995	0.769047	1.06407	1.10161	1.12622	1.13703	1.13027	1.16607	0.870329	0.91535	0.955145	0.9108	0.918746	0.910572	0.776082	0.756024	0.781322	0.903749	0.945007	0.934748
ASNSD1	54	1.04925	1.00957	1.21786	0.805998	0.789718	0.791405	1.04606	1.11341	1.11727	0.918555	0.930745	0.958614	1.04461	0.972044	1.01007	0.830498	0.733244	0.831611	1.14378	1.02579	1.16548	0.889468	0.905284	0.836844	0.996882	1.04943	1.05398	1.07176	1.01401	1.2046	0.852693	0.837759	0.852157	1.31344	1.36074	1.3596	0.984147	0.960859	0.938126	0.980754	0.916703	0.938267	1.18821	1.23488	1.2341	0.968654	0.960757	0.996542
ASPA	9				1.22916									1.39171						1.92676			2.8172			2.38964						2.26274			2.11825			2.48722									2.2022
ASPH	54	1.20842	1.22604	1.20802	1.31887	1.12272	1.23039	0.879021	0.884239	0.88648	1.18671	1.27733	1.19056	1.01088	0.971308	0.968735	0.57873	0.506551	0.533262	1.694	1.67042	1.6873	1.29213	1.19517	1.25118	1.36126	1.38266	1.37955	1.76942	1.84881	1.7774	1.67565	1.72109	1.78967	0.587116	0.524624	0.577224	0.575024	0.506892	0.563036	0.515066	0.456809	0.446009	0.876458	0.907244	0.865646	0.83249	0.814916	0.858976
ASPHD1	45	1.2066	1.15182		3.51044	2.76921	2.9174	0.775639	0.973437		0.578719	0.818678		0.718266	0.631964	0.639297	0.378691	0.73043		0.840562	0.975687	1.12144	1.73034	1.35435	1.59202	0.797707	0.715783	0.89397	0.801187	0.843989		1.11262	1.25651	1.29822	0.840854	0.67056	0.705963	0.703572	0.264593	0.628786	0.497425	0.698142		1.36834	1.53913		0.846431	0.921958	0.864712
ASPHD2	35	0.791648	0.629097	0.834667	0.677235			1.64544	0.861532	0.707211	5.96296	2.77564	2.70455	0.904898			0.865329	0.960371	0.615101	1.00703			0.781117			1.39301			1.00972	1.07712	0.443308	0.613861			1.1712			1.11535			NA	0.666502	0.813207	1.21686	0.897836	1.12394	0.580781
ASPM	54	0.938021	0.878563	0.917735	1.15868	1.04396	1.11577	1.26616	1.29628	1.24129	1.09636	1.13327	1.06821	1.08901	1.03321	1.01025	0.759713	0.618918	0.64721	0.982721	0.991108	0.989798	1.20133	1.15789	1.09244	1.01309	0.915332	0.924739	0.954031	0.952407	1.00867	0.99349	0.972874	0.97361	1.06359	1.08031	1.02795	0.818244	0.846731	0.793532	0.803641	0.76008	0.781249	1.37023	1.41077	1.31894	0.923116	0.937763	0.927998
ASPN	18	1.4881		1.69638				1.02314		0.616364	1.70412		1.39053				1.96323		1.18147										1.14152		1.58231										0.864656		0.775783	1.12031		1.88838
ASPSCR1	54	1.03156	1.06338	1.01647	0.614342	0.674751	0.645218	0.95243	0.973704	0.957291	1.08004	1.12829	1.05314	0.811162	0.888266	0.810771	1.07907	0.966771	1.02984	0.625853	0.678473	0.665109	0.851017	0.779721	0.791718	0.849993	0.883519	0.834286	1.04785	1.0103	1.02454	0.921734	0.896447	0.851867	1.14333	1.27291	1.2243	1.06753	1.19553	1.10202	0.980187	1.01074	1.00891	1.88341	2.23235	1.91904	1.07547	1.14315	1.14816
ASRGL1	54	0.570919	0.604513	0.614133	0.323488	0.352898	0.278019	5.47346	5.24106	5.11659	1.341	1.33237	1.53137	0.912055	0.832783	0.84243	0.484022	0.492492	0.389022	0.262392	0.333004	0.275505	0.558978	0.564405	0.520989	0.274064	0.268485	0.229324	1.16592	1.12573	1.13222	0.214488	0.314308	0.24966	0.370719	0.444697	0.405039	0.750501	0.724424	0.695632	0.784202	0.728038	0.796947	0.522892	0.516403	0.56697	1.03948	1.13444	1.09144
ASS1	54	0.999498	1.05471	1.02943	0.490863	0.624463	0.463928	0.640817	0.62784	0.610601	1.16561	1.22271	1.14785	2.1665	2.29527	2.24653	0.384469	0.40759	0.420556	0.92458	1.0128	0.953966	1.06054	1.1231	1.07486	1.04809	1.13264	1.07183	0.626317	0.587465	0.608746	1.50073	1.51181	1.56197	0.767158	0.854935	0.763647	0.506591	0.563023	0.476844	0.605125	0.605773	0.644597	1.05786	1.06263	1.04987	1.69314	1.7081	1.77477
ASTE1	54	0.825481	0.83681	0.891231	0.997011	0.920635	0.934535	1.22827	1.19632	1.14361	0.80784	0.9379	0.934189	0.77404	0.803198	0.765063	0.851646	0.828542	0.910229	1.23852	1.21567	1.10702	1.05981	1.10036	1.10666	0.875958	0.962135	0.986783	0.996189	1.01059	0.972512	1.35306	1.19274	1.36556	1.24935	1.12195	1.46276	1.09551	1.04549	1.13516	0.993847	1.05944	0.910166	0.846634	0.892089	0.883262	0.613927	0.652607	0.74186
ASTN2	9			2.00365						1.47237			2.68074						3.62681												0.62993												1.99362			0.803037
ASUN	54	1.07646	1.09528	1.09705	1.00868	1.04273	0.94274	1.04231	1.09369	1.04053	0.876803	0.90524	0.875504	1.29463	1.35549	1.24664	0.89855	0.813483	0.819759	1.28924	1.31703	1.17797	1.18333	1.30396	1.16666	0.824324	0.818741	0.809328	0.943958	0.97035	0.929658	1.00187	1.01868	1.00585	1.04923	1.07624	0.99559	1.07084	1.08189	1.00665	1.04014	1.09558	1.05649	0.769108	0.760133	0.744925	0.87308	0.916171	0.85336
ASXL1	54	1.04577	0.886559	1.01436	1.19053	1.24174	1.56801	1.15717	1.12571	0.905325	1.45923	1.4807	1.4923	1.29489	1.20522	1.0019	0.787365	0.592203	0.728809	1.6573	1.62873	1.8169	1.07487	1.08759	1.06074	0.885644	0.914036	0.828548	1.20591	1.17381	1.24916	0.820347	0.895478	0.857584	0.71722	0.803469	0.640034	0.661636	0.569618	0.637272	0.840614	0.567389	0.815621	1.03933	0.999477	1.03293	0.445608	0.687311	0.502474
ASXL2	54	1.0453	1.11618	1.00711	0.885432	0.809084	0.842784	0.993088	1.00953	0.981771	1.16627	1.19733	1.13176	0.590226	0.662818	0.606822	1.0986	1.10754	1.11433	1.23697	1.1818	1.2593	1.0274	1.06315	1.03989	1.01718	1.06059	1.02568	0.864805	0.865331	0.840073	0.989723	1.00687	1.00348	1.24736	1.20899	1.22885	1.25828	1.19692	1.26919	1.13535	1.16289	1.06033	1.02256	0.992219	0.96596	0.959519	1.01415	1.00716
ATAD1	54	0.728731	0.771194	0.789673	1.17063	1.06501	1.07861	1.02487	1.00081	1.05726	0.941195	0.973953	1.0453	0.801197	0.765287	0.834128	0.942449	0.820996	0.917169	1.04066	0.912489	0.996952	0.590783	0.544525	0.590697	1.007	1.02685	1.01666	1.05766	1.03277	1.13028	1.04124	0.958172	1.02994	1.09056	1.11503	1.11062	0.931329	0.913163	0.940664	0.989756	0.967252	1.02222	1.4118	1.4657	1.47253	0.873905	0.877171	0.9146
ATAD2	54	0.650607	0.629246	0.645653	0.80958	0.776733	0.75455	0.913151	0.94657	0.944637	0.880513	0.856492	0.846062	0.717272	0.752486	0.715366	1.00727	0.95907	0.974103	0.761217	0.801889	0.769646	0.860492	0.866404	0.844196	1.14915	1.16351	1.0884	0.770279	0.760534	0.76828	1.27239	1.26191	1.26687	1.57054	1.63405	1.56452	1.30397	1.37833	1.3077	1.43335	1.43455	1.41135	0.739996	0.705846	0.73229	2.15766	2.08887	2.03406
ATAD2B	54	0.910849	0.809936	0.847261	0.782735	0.781819	0.665778	1.17383	1.1186	1.14391	0.751219	0.665946	0.714066	1.13108	1.19071	1.11478	1.59058	1.59231	1.55116	0.907537	0.899468	0.895491	0.824008	0.786764	0.777345	0.966494	0.99561	0.897855	0.670576	0.636234	0.692401	0.80915	0.861373	0.834471	1.5397	1.66568	1.56997	1.44382	1.61062	1.57683	1.68846	1.77931	1.6212	0.953029	0.92313	0.996599	1.20487	1.18997	1.1798
ATAD3A	54	0.95768	0.970255	1.02745	1.54619	1.43076	1.47773	1.15507	1.1198	1.12626	1.02119	0.990027	1.01372	1.07235	1.07837	1.02307	0.789057	0.79527	0.893537	0.850188	0.87467	0.884856	1.05616	1.07348	1.04622	1.16944	1.07371	1.13237	1.09204	1.10106	1.06733	1.36561	1.23477	1.3348	0.864901	0.897222	0.810492	0.900697	0.943485	0.902599	0.941539	0.961417	0.944957	1.12784	1.19401	1.19403	1.26992	1.16944	1.25039
ATAD3B	54	0.86486	0.764715	0.949077	2.80607	2.70934	2.3476	1.98805	1.84736	1.71289	0.742057	0.531933	0.843621	0.85887	0.913934	0.912339	0.608528	0.498397	0.533389	0.781763	0.711144	0.783024	0.971757	0.975217	0.922469	1.39516	1.44632	1.30878	1.60597	1.58682	1.5275	1.1593	1.11158	1.19222	0.556939	0.526199	0.640955	0.673199	0.565438	0.64654	0.546615	0.475563	0.491671	0.599497	0.557239	0.588815	1.10674	1.12534	1.09348
ATAD5	54	0.958434	1.00974	0.962234	0.98992	0.822108	0.863816	1.75231	1.75976	1.7915	1.097	1.07803	1.12672	0.999192	0.995679	0.94632	0.638866	0.600203	0.583439	1.208	1.15725	1.20411	1.18784	1.0933	1.07994	1.41051	1.53717	1.38376	1.23372	1.19857	1.1852	0.903675	0.851905	0.86836	1.22467	1.25108	1.28499	0.741718	0.762417	0.768753	0.812123	0.769864	0.88994	0.853754	0.910207	0.867703	0.822068	0.762756	0.855872
ATAT1	54	0.736576	0.815918	0.635446	1.0062	1.53903	1.41485	1.08301	1.20814	1.15402	1.04583	1.00078	0.995325	1.46853	1.7074	1.86407	0.821566	0.799666	0.73759	0.6211	0.661732	0.454396	0.691098	0.828504	0.90973	0.682707	0.8875	0.852851	0.833202	0.852424	0.918735	0.665582	0.651065	0.698816	0.889755	0.876904	1.0363	0.813301	0.770537	0.905015	0.81778	0.77785	0.858627	2.02134	2.07038	1.81352	0.649364	0.589054	0.58428
ATCAY	27	1.08063	0.958125	1.99977				1.06587	0.98757	1.03016	0.844833	0.78962	1.03657				1.1957	0.837585	1.21895										0.800671	0.859108	1.15196										1.11707	0.865887	1.14141	1.65476	3.02141	2.05909
ATE1	54	0.619952	0.647371	0.679517	0.758202	0.753819	0.771241	1.31323	1.46869	1.48393	1.1261	1.13097	1.19125	0.80153	0.82155	0.824553	1.12031	1.09566	1.19104	0.890258	0.956652	0.844792	1.47719	1.47763	1.53409	0.857558	0.898097	0.891535	1.03458	1.0511	1.04574	0.945611	0.920176	0.928327	1.09104	1.0704	1.0946	0.930998	0.996804	0.961936	1.04519	0.896792	0.990593	0.818386	0.828131	0.803639	1.08317	1.15962	1.11523
ATF1	54	1.13399	1.09417	1.12204	0.776989	0.984142	0.962077	1.3364	1.30536	1.31613	0.944928	1.07484	0.996079	0.822704	0.666281	0.644003	0.563233	0.599025	0.675183	0.960877	1.12882	0.968672	1.04405	0.973711	0.985904	0.846393	0.947434	0.829284	0.863446	0.815068	0.846927	0.994031	0.949461	0.859829	1.36784	1.73074	1.72179	1.4886	1.58462	1.44857	1.20106	1.29489	1.22347	0.888758	0.826335	0.931952	0.719526	0.620151	0.573007
ATF2	54	1.03389	1.13527	1.00992	0.857661	0.898745	0.832182	1.19493	1.24186	1.19507	1.26204	1.31408	1.3807	1.21419	1.05604	1.07857	0.953305	1.02614	0.908659	1.74083	1.50683	1.52892	1.11333	0.94216	1.03476	0.704698	0.704366	0.663269	0.961414	1.03536	0.96739	1.08763	1.09063	1.08751	1.02369	0.994302	1.01732	0.986448	0.910676	1.04974	0.931562	0.987312	0.868691	1.31735	1.27298	1.17999	0.516051	0.537947	0.542636
ATF3	54	1.59394	1.3719	1.52571	0.822327	0.969421	1.01269	0.497035	0.538274	0.468081	1.53675	1.77062	1.78062	1.68413	1.43466	1.59332	0.897553	0.954169	0.875949	0.814571	0.978955	0.86039	0.766278	0.703586	0.748694	1.58996	1.67629	1.8655	0.746649	0.704626	0.788281	1.33235	1.4012	1.305	0.446708	0.607253	0.60999	0.630153	0.756923	0.622374	0.610859	0.685005	0.54032	0.687356	0.687702	0.708272	0.728943	0.801449	0.899354
ATF6	54	0.931565	1.01823	0.906432	1.23652	1.31245	1.36364	1.00798	1.15436	0.967227	1.08061	1.08828	0.930924	1.26599	1.48676	1.18152	0.79016	0.697288	0.692569	1.03055	1.1449	1.13675	1.09177	1.29088	1.10203	1.00921	1.08265	1.0431	2.09099	2.57409	2.2876	0.897028	0.963178	0.958549	0.804425	0.662956	0.712292	0.712234	0.573414	0.645685	0.733374	0.678981	0.656869	0.762903	0.689925	0.686423	0.593977	0.483218	0.576864
ATF6B	54	0.985248	1.07781	0.955058	1.30069	1.25454	1.12918	1.11998	1.08138	1.13015	0.948204	0.914505	0.903015	1.59827	1.62282	1.32292	0.693648	0.766199	0.668636	0.861974	0.947954	0.867267	1.2939	1.32126	1.23742	0.809115	0.826442	0.785572	1.98427	2.03961	1.81382	1.01212	1.07254	1.07121	0.758576	0.80978	0.76134	0.830763	0.849585	0.74913	1.0456	1.12265	0.952295	0.671993	0.66282	0.665947	0.665355	0.570218	0.349693
ATF7	54	0.650065	0.661564	0.744426	1.02253	0.998962	0.983348	1.09416	1.03049	1.15359	0.931457	1.01539	0.976319	1.15166	1.13205	1.07608	0.839442	0.800974	0.928381	1.44519	1.35621	1.12917	0.941899	0.962651	0.871004	0.708442	0.721751	0.709194	1.05952	1.02258	0.977455	1.12313	0.97564	1.01451	1.35353	1.20621	1.03133	0.999157	1.06962	1.1964	0.994453	0.949141	1.01974	1.00622	0.759157	0.830783	0.944178	0.896402	0.795855
ATF7IP	54	0.981348	0.938995	0.966982	1.03438	1.00192	0.975846	1.1919	1.20972	1.26959	0.911307	0.910546	0.868899	1.24676	1.2038	1.22195	0.903372	0.767965	0.797046	1.17491	1.2098	1.27779	1.09578	1.03843	1.05055	0.941471	0.971998	0.977611	1.06876	1.03353	1.02447	1.13144	1.08083	1.1572	1.01815	0.986781	1.05955	1.18945	1.24277	1.26693	1.28113	1.27213	1.23144	0.849513	0.841262	0.823151	0.837065	0.823932	0.811447
ATF7IP2	27		1.65965	1.40285		0.707749			0.9746	0.921219		0.930978	0.767346		1.17498			0.891882	1.32756		0.854909			0.768769			0.762379			1.20463	0.908809		1.06159			1.22372			1.39627			0.987866	1.17348		0.973538	1.01571		0.922181
ATG10	18	0.673923			1.20237			0.923321			1.06309			0.935082			1.07854			0.979295			0.867018			1.43308			0.950531			0.76522			1.14013			1.41448			1.01114			0.817028			0.691692
ATG12	54	1.09006	0.986632	1.38187	0.861675	1.29873	1.02793	0.968954	0.967785	1.04544	0.852582	0.843224	0.861197	0.577071	0.555723	0.554129	2.00396	1.53996	2.49781	1.08081	0.964736	1.14389	0.758162	0.707358	0.687716	1.20039	1.16379	1.14445	1.0593	1.15573	1.08217	1.00911	0.884785	0.978626	1.34699	1.3498	1.22239	1.45673	1.37077	1.37201	1.28927	1.37611	1.2906	1.03366	1.17851	1.15484	1.47559	1.19015	1.15881
ATG13	54	1.16997	1.17228	1.08681	1.15407	1.31294	1.3008	1.1104	0.913796	0.993679	1.08118	1.07699	0.940955	0.996702	1.10693	0.924287	1.14676	1.07501	1.06688	0.87483	0.996741	0.929237	0.990652	0.925386	0.873548	0.818958	0.876001	0.801798	1.2926	1.24926	1.25371	0.789715	1.02133	0.941232	0.927383	1.16965	1.03275	0.971684	1.03207	0.933761	1.1497	1.01233	1.15014	1.00835	1.0354	1.00262	0.991419	0.997494	0.783125
ATG14	54	0.909138	0.884903	0.89505	1.11434	1.01318	1.12297	0.863764	0.970264	1.04826	1.18393	1.28921	1.30124	0.727288	0.785067	0.820002	1.12982	1.0615	1.08557	0.696538	0.765795	0.796408	0.81163	0.82435	0.807975	1.02524	1.06286	1.03592	1.47133	1.66197	1.64288	1.1433	1.1133	1.14049	1.18244	1.20408	1.21105	0.928077	0.920655	0.818631	0.705057	0.82127	0.772102	0.783229	0.872919	0.838518	0.778066	0.802937	0.83767
ATG16L1	54	1.4494	1.58994	1.45089	1.07492	1.05741	1.10537	1.05061	1.0319	1.02349	0.856153	0.816208	0.885973	0.564905	0.498581	0.523478	1.65283	1.55362	1.67766	0.917886	0.788874	0.791878	0.82914	0.720446	0.822712	1.11111	1.08463	1.07168	1.24641	1.27354	1.22861	1.08178	1.05551	1.05825	1.11999	1.14475	1.14661	1.08444	1.02043	1.07405	1.03267	1.02734	0.965046	1.11658	1.05278	1.04373	1.06008	0.986568	0.988696
ATG2A	54	1.20027	1.2687	1.20456	0.870577	0.852849	0.893963	0.830403	0.765632	0.762074	1.03064	0.925442	0.976908	1.09661	1.04153	1.09751	0.960734	1.04616	1.02145	0.7209	0.744257	0.66187	0.986595	1.01314	1.04673	0.992429	0.986588	1.01894	1.09233	1.10711	1.08257	0.827229	0.809648	0.778176	0.909254	0.84773	0.812132	0.916149	0.89813	0.927301	1.08757	1.04907	0.984043	0.940674	0.897781	0.877034	1.36956	1.35511	1.29042
ATG2B	54	0.915577	0.94565	0.910589	0.994726	0.978137	0.956129	0.912825	0.900981	0.880132	0.906787	0.963056	0.9205	1.13802	1.18662	1.06756	1.06827	1.09409	1.07576	0.763658	0.684734	0.634277	0.822434	0.812489	0.780318	0.932008	0.918287	0.868441	0.92612	0.876945	0.894222	0.761942	0.725584	0.701814	1.24212	1.33207	1.27009	1.10532	1.11015	1.0774	0.978253	0.974436	0.951544	1.26582	1.34302	1.30679	0.871123	0.89094	0.891397
ATG3	54	1.55525	1.61157	1.49067	1.06799	1.05639	1.06463	1.00576	0.941195	0.953547	0.936288	0.928841	0.893238	0.715803	0.753297	0.770906	0.984736	0.989483	0.95142	1.18774	1.17046	1.19792	1.26543	1.27805	1.36953	0.969003	0.932703	0.966068	0.819226	0.793865	0.845237	1.17726	1.11257	1.16409	1.03278	1.03473	1.04309	0.982346	0.918734	0.966558	0.958018	0.944766	0.910106	1.02382	1.01912	1.0404	1.07981	1.09257	1.09912
ATG4A	54	1.93222	1.75921	1.45842	0.976198	1.12109	1.19469	0.595286	0.534336	0.515413	0.603505	0.634674	0.715001	1.31703	1.37015	1.51897	1.44249	1.35104	1.16013	0.658343	0.561017	0.647479	0.804561	0.782244	0.822222	1.16786	1.18726	1.31917	1.24446	1.22525	1.26044	1.02686	1.04876	1.17823	1.15298	1.04437	1.13623	0.899749	0.84315	0.912112	0.983327	0.866654	0.924158	0.918662	0.8577	0.79973	1.17074	1.26975	1.16962
ATG4B	54	1.381	1.43125	1.5242	0.880008	0.899813	0.903195	1.30163	1.18967	1.33598	0.878134	0.885529	0.880764	0.299787	0.365429	0.278546	0.908507	0.928685	0.897629	1.01683	1.05193	1.04431	0.54741	0.593808	0.532005	0.806187	0.840566	0.776614	1.26346	1.37373	1.38817	0.767845	0.883453	0.818447	1.29921	1.31885	1.46397	1.12818	1.1827	1.34248	1.17861	1.07914	1.10107	1.05296	1.03842	1.0336	0.853871	0.800688	0.749016
ATG4C	54	0.991009	0.800451	0.982487	0.984882	1.42318	1.1942	1.14431	1.2012	1.33489	0.960671	0.724588	0.707256	1.30447	1.55867	1.45471	0.86921	0.901014	0.854128	0.967871	0.887624	1.00805	0.711659	0.507298	0.534209	0.905697	0.930403	0.961214	0.888027	0.752397	0.758762	0.869735	0.827917	0.948196	1.21227	1.17516	1.19061	0.966198	0.859791	0.846582	0.673278	0.770521	0.677747	0.875137	0.952816	0.866749	1.59839	1.87987	1.82029
ATG4D	18			0.797965	0.684694					1.36712			0.991604	1.18871					0.822492	0.689808			0.915772			0.902337					0.873766	0.994459			0.997448			1.1377					0.973245			1.13489	1.13951
ATG5	54	1.42973	1.45405	1.32488	1.19833	1.0264	1.18784	0.975405	0.995965	1.00628	0.793156	0.828144	0.905266	0.63974	0.636229	0.651144	1.64019	1.64926	1.50951	0.881129	0.831968	0.818027	0.808734	0.759857	0.789916	1.10938	1.02136	1.0865	1.19682	1.27029	1.23187	1.1064	1.04821	1.01076	1.10405	1.10326	1.16165	1.10279	1.09578	1.0968	1.00623	1.09465	1.11882	1.20552	1.12295	1.21993	1.092	1.13547	1.05136
ATG7	54	0.934853	0.950173	0.961643	2.24917	2.29732	2.40621	0.610852	0.68262	0.649271	0.888847	0.879867	0.877621	0.529792	0.544179	0.567569	1.17313	1.12371	1.09574	0.610985	0.647113	0.639616	1.25934	1.3725	1.36217	0.729159	0.737031	0.740455	1.23493	1.29821	1.26046	0.836505	0.838567	0.780891	1.16865	1.09977	1.09214	1.12308	1.07513	1.07897	1.04978	1.07922	1.04379	1.1091	1.11879	1.12551	0.939957	0.967238	0.894778
ATG9A	54	0.773382	0.75968	0.829844	1.34026	1.32	1.2853	1.05482	1.07664	1.05055	0.993182	0.934087	0.939661	1.03887	1.03886	0.949849	0.844963	0.917509	0.910815	0.772657	0.724116	0.80495	0.719984	0.742158	0.694859	0.861207	0.882998	0.852601	1.02103	1.13253	1.07339	1.07836	1.10225	1.04719	1.06925	1.02648	0.973389	1.04906	1.02372	0.944438	0.978296	1.008	0.971033	1.38682	1.50274	1.54783	0.932163	0.922523	0.856203
ATHL1	54	1.46249	0.641727	0.835872	0.653289	0.275769	0.619382	0.963401	0.798357	0.577269	1.0752	0.647863	0.65223	0.715139	0.505977	0.967424	1.12843	0.708136	0.572781	2.08315	2.23257	2.28487	0.672838	0.492296	0.840374	0.684	0.606735	0.63967	0.511779	0.655798	0.546327	1.16308	1.13767	1.18061	1.08381	1.16391	1.06175	1.18352	1.23525	1.09234	0.586574	1.15157	0.671155	1.19729	1.22199	1.13593	1.13815	1.03281	0.99992
ATIC	54	0.905005	0.927396	0.914279	0.69471	0.693777	0.71337	1.19731	1.19673	1.1718	0.797204	0.781941	0.817981	0.525849	0.516515	0.561336	1.02655	1.02542	1.02901	0.887806	0.899524	0.898678	0.803255	0.788568	0.797739	0.740664	0.741272	0.714774	1.35067	1.31625	1.28956	0.995278	0.973383	0.977156	1.43598	1.39319	1.38308	1.7623	1.67158	1.71772	1.45856	1.44649	1.39552	1.11078	1.11957	1.09514	0.67043	0.67723	0.680985
ATL1	54	0.575004	0.60054	0.675712	1.21957	1.33504	1.21715	0.51772	0.572331	0.639155	1.3609	1.39842	1.36226	2.25451	1.80441	2.0654	0.528431	0.474888	0.594457	0.528618	0.655691	0.646142	0.659504	0.684567	0.620412	0.511547	0.574445	0.452044	1.78183	1.94547	1.85468	1.84769	1.77834	1.89963	0.378047	0.436319	0.336952	0.313279	0.612007	0.394877	0.451244	0.400971	0.594482	1.84804	1.77291	1.74078	0.407997	0.547696	0.404559
ATL2	54	1.25905	1.32259	1.21197	0.748943	0.714574	0.693423	1.16478	1.19672	1.15588	0.961932	0.943938	0.959263	1.33224	1.32887	1.30771	0.717836	0.707085	0.718068	1.05158	1.0192	1.00505	0.932705	0.897724	0.875665	1.25471	1.19284	1.22978	1.07404	1.09246	1.07882	1.26391	1.22213	1.28065	0.944791	0.932227	1.00285	0.911076	0.942762	0.93393	1.01341	1.03536	1.08242	1.1202	1.15313	1.08172	0.719485	0.711503	0.779485
ATL3	54	1.19751	1.21419	1.17593	1.15622	1.07358	1.04299	0.754653	0.750835	0.75999	0.923884	0.920912	0.902414	0.82263	0.800685	0.819351	1.51616	1.53647	1.4845	0.873777	0.841493	0.846949	1.04876	1.02064	1.01009	0.913351	0.897036	0.908382	1.06222	1.09224	1.06292	1.30003	1.24547	1.28818	1.04941	1.02003	1.03203	0.925903	0.908349	0.917576	0.960049	0.966776	0.948404	0.876417	0.90601	0.868251	0.857516	0.809223	0.867945
ATM	54	0.92227	0.900801	0.939615	1.25952	1.23674	1.1614	1.19851	1.17579	1.15947	0.959835	0.952312	0.962725	0.720637	0.716483	0.708039	0.782508	0.813578	0.82125	0.83005	0.82762	0.847694	0.862306	0.866175	0.8407	0.625719	0.663342	0.592951	1.11072	1.14846	1.12869	1.15103	1.15465	1.15041	0.907377	0.917556	0.911233	0.792327	0.758625	0.765344	0.74693	0.726339	0.707871	1.25664	1.29416	1.28226	1.22767	1.2029	1.20903
ATMIN	36	0.719874	0.659584	0.623129		1.32741		0.706356	0.692513	0.576817	2.56591	2.2298	2.42924		1.35437		0.36379	0.677115	0.429527		1.9282			0.900639			1.01144		1.4718	1.40331	1.49741		1.15025			0.56604			0.521951		0.357844	0.446112	0.286413	0.859973	0.832087	0.859257		0.549358
ATN1	54	1.22821	1.27427	1.12854	1.02549	1.04899	0.996356	0.849553	0.82681	0.874828	0.964777	0.958385	0.962794	1.29629	1.37868	1.22836	0.905041	0.876528	0.915048	1.31272	1.34873	1.29684	1.07108	1.05887	0.970516	1.12313	1.0477	1.00976	1.16243	1.02027	1.09898	0.919671	0.905853	0.931543	1.02532	0.969912	1.04768	1.21466	1.11859	1.06281	0.972421	1.17182	0.938085	0.581591	0.610774	0.697722	1.09944	1.07842	1.08365
ATOX1	54	1.08815	1.11002	1.06102	0.998607	1.04566	1.05413	0.809991	0.735	0.797883	1.2361	1.20568	1.25484	0.86972	0.837593	0.901313	0.9018	0.848176	0.885395	0.972697	0.962944	0.943435	0.771517	0.929402	0.832853	0.720338	0.742512	0.696391	0.840045	0.876264	0.914813	0.787228	0.836681	0.741476	0.932471	0.990914	0.947516	1.16263	1.25633	1.11769	1.1044	1.15207	1.0948	1.46082	1.49969	1.47056	1.84623	1.74727	1.73285
ATP10D	27		1.54525	1.29367		1.56977			1.6314	1.27978		0.675812	0.782019		0.482999			0.638747	0.53254		1.13023			3.03737			1.34565			1.88463	1.58885		1.19468			0.367978			0.252416			0.380608	0.461108		1.61452	1.42735		0.41014
ATP11A	54	1.22487	1.28259	1.22794	1.18985	1.34761	1.23937	1.62158	1.79154	1.86952	1.30822	1.41552	1.40287	1.5158	1.8285	1.57541	0.632802	0.523134	0.540329	0.857647	0.785721	0.865972	1.15254	1.21159	1.11301	1.07873	0.991043	1.02508	0.845842	0.829072	0.804473	0.973327	1.0255	1.0357	0.690202	0.538611	0.610519	0.862285	0.840554	0.849522	0.907286	0.9221	0.950508	0.954507	0.917205	1.00598	0.88762	0.88326	0.889538
ATP11B	54	1.23691	1.25811	1.22462	0.786306	0.849288	0.820686	0.610202	0.570876	0.553309	0.993065	1.00797	0.992776	0.892239	1.02781	0.96365	0.997046	1.03191	1.00889	0.615185	0.763797	0.722097	1.47253	1.49324	1.36208	1.21292	1.24156	1.20844	1.32146	1.42156	1.40192	1.75391	1.86928	1.88008	0.946005	0.913464	0.94805	0.946934	0.983714	0.981179	0.860929	0.892687	0.830137	0.836011	0.808084	0.811261	0.597789	0.61989	0.550989
ATP11C	54	1.0449	0.946168	1.04973	1.75381	2.00464	1.99664	1.40576	1.42047	1.45666	0.64975	0.606633	0.750349	1.76481	1.89607	1.76838	0.39516	0.434363	0.498166	1.14802	1.11932	1.12033	0.76615	0.759224	0.724924	0.905832	0.890139	0.842247	0.946223	0.925728	0.904325	0.944388	0.938179	0.897987	1.12527	1.07517	1.07421	0.917984	0.942529	0.923966	1.1995	1.04708	1.16294	0.915799	0.906157	0.942898	0.500324	0.474242	0.456779
ATP12A	9				1.2876									0.872783						0.964604			1.43137			1.00017						1.3028			0.745156			0.867119									1.22485
ATP13A1	54	0.871084	0.83954	0.840771	0.961502	0.98407	0.871563	1.04854	1.10301	1.07243	1.10419	1.15353	1.12187	1.48263	1.44333	1.49245	1.08776	1.0462	1.09622	0.917578	0.920894	0.85527	0.843128	0.822746	0.813519	0.985505	1.03543	0.973213	0.775529	0.769615	0.794776	0.996906	1.01826	1.01239	0.954911	1.01495	0.971714	1.32913	1.34351	1.35504	1.29041	1.37281	1.29774	1.03165	1.04625	1.01205	0.820553	0.846496	0.802157
ATP13A2	54	1.25152	1.14742	1.04406	0.787019	0.886011	0.947593	0.880714	0.716531	0.875903	1.02011	1.05127	1.31751	0.944286	0.930368	0.917312	1.23285	0.976444	1.00993	0.916392	0.992671	0.998144	0.970438	0.933289	0.959023	0.90516	1.00655	0.916656	0.814198	0.610444	0.882059	1.55223	1.64826	1.93833	0.784564	0.833359	0.830861	0.929439	0.914951	0.941706	1.00468	0.905751	0.990717	1.11897	1.0122	1.02186	1.17174	1.16804	1.18171
ATP13A3	54	1.05081	1.23172	1.15706	0.855701	0.857434	0.857383	0.891062	0.937787	0.914971	0.930961	0.963407	0.940159	0.718835	0.69893	0.809268	1.21354	1.32878	1.25508	0.669161	0.774798	0.745285	2.05647	2.21328	1.9463	1.3637	1.30892	1.38321	0.873066	0.876665	0.866349	1.10329	1.10454	1.09486	1.04357	0.992074	1.01168	0.726804	0.720122	0.71747	0.706628	0.761253	0.731051	0.972645	1.00034	0.939858	0.714965	0.759849	0.769165
ATP13A4	18	0.561724			0.248319			0.554181			0.314497			0.234424			7.77899			0.215817			0.382748			0.328145			0.393376			2.38974			0.332256			0.447955			0.488517			0.596844			0.877691
ATP1A1	54	1.17175	1.21329	1.18137	1.28575	1.2377	1.24046	1.04999	1.08923	1.05027	1.22244	1.26296	1.21466	0.902973	0.886862	0.912506	0.949649	0.958089	0.930469	0.872102	0.942121	0.863264	1.6868	1.5643	1.67449	0.937969	0.962758	0.936624	1.30733	1.35202	1.28335	1.6597	1.61299	1.60696	0.714342	0.771344	0.715075	0.865182	0.88398	0.857671	0.843021	0.827899	0.832034	0.667356	0.647337	0.669174	1.37292	1.35633	1.35795
ATP1A2	18	0.920783			1.39575			0.906012			1.0888			0.861868			1.64503			0.920989			1.54548			0.94109			1.02949			1.6272			0.691416			0.933888			0.910367			0.851097			1.26918
ATP1A3	54	1.38368	0.682937	0.748679	0.770969	0.842614	0.671313	0.835427	0.690338	0.672519	1.21081	0.933965	1.16543	0.753204	0.682287	0.644571	1.11305	0.958774	0.913759	1.37293	1.38953	1.77094	1.30476	1.51431	1.52282	0.985009	0.927481	0.89925	0.862794	0.627998	0.714184	0.760498	0.732545	0.564277	0.800705	0.813263	0.811619	0.742104	0.689606	0.558083	0.910273	0.882622	0.825133	1.22215	0.860097	1.09964	2.14252	2.05344	3.50193
ATP1B1	54	1.17746	1.18303	1.13647	0.545201	0.598378	0.477285	1.08266	1.12602	1.121	1.68104	1.75235	1.567	1.05201	1.09284	1.04855	1.01764	1.00915	1.01625	0.673655	0.800836	0.635475	1.91457	1.92365	1.86694	1.09388	1.14237	1.10645	1.05857	1.09322	1.07193	1.6585	1.63873	1.66616	0.605615	0.58651	0.59373	0.970809	1.01565	0.978265	0.860034	0.91183	0.87087	0.356056	0.354461	0.416156	1.4931	1.51691	1.48371
ATP1B3	54	1.15584	1.10856	1.08924	1.59438	1.49289	1.4654	1.03723	1.02695	0.943252	0.919923	0.856479	0.885269	0.728951	0.70835	0.716077	0.856449	0.800556	0.873094	1.09126	1.08167	1.09471	1.20139	1.19161	1.20757	0.840674	0.834831	0.877548	1.41859	1.39602	1.35089	1.47126	1.39622	1.4596	0.827409	0.829837	0.834629	0.726077	0.689685	0.711161	0.717143	0.69746	0.744212	0.903426	0.917555	0.857733	1.15244	1.13806	1.13386
ATP2A1	18			0.891574		1.41837				0.975538			1.31285		0.883521				1.02599		1.07447			1.06732			1.24051				0.857336		0.856457			0.711952			0.772488				0.667795			0.774696		0.917781
ATP2A2	54	0.890475	0.903251	0.901418	1.08564	1.01987	1.02483	0.871205	0.844797	0.841691	1.0196	1.04136	1.02576	1.0286	1.03967	1.04214	1.18434	1.19902	1.16115	1.05228	1.012	1.08706	1.01121	0.940811	0.950125	1.22581	1.20877	1.21266	1.15052	1.20645	1.18223	1.21315	1.16802	1.20332	0.981734	0.98102	1.01862	0.843099	0.87197	0.848343	0.959435	0.967424	0.957321	1.08816	1.04713	1.0561	0.930358	0.9306	0.944229
ATP2A3	54	0.509604	0.426011	0.520315	0.584368	0.579177	0.522057	0.480342	0.479684	0.465856	0.502875	0.466319	0.522414	0.534031	0.629609	0.444112	3.10933	3.19974	3.05056	0.494467	0.623823	0.423136	0.545297	0.633753	0.541363	0.532285	0.656574	0.521808	0.371469	0.415737	0.431027	0.620442	0.685436	0.570501	1.44633	1.45102	1.46896	1.82009	1.74716	1.83874	1.89291	2.07105	1.87192	0.487147	0.442931	0.515234	2.94052	2.96339	3.22587
ATP2B1	54	0.688887	0.6955	0.697351	2.28259	2.35064	2.13243	0.911356	0.985782	0.983239	1.00913	1.01809	0.980616	0.595877	0.610228	0.605414	0.902677	0.865783	0.860959	0.921792	0.88245	0.959014	1.02812	0.994351	0.968903	0.773125	0.793607	0.772947	1.19964	1.12423	1.18382	1.03425	1.04598	1.03572	1.07733	1.17365	1.14454	1.10982	1.16476	1.15251	1.3695	1.39644	1.50902	1.17198	1.22417	1.18929	0.700476	0.733457	0.730286
ATP2B2	36	0.479991	0.892719	0.570342		1.23785		0.861547	1.22119	1.01033	0.927296	1.20595	1.05248		0.693248		0.624876	1.00093	1.25594		0.972802			0.999367			0.904639		1.19636	1.44086	0.546878		1.31462			0.71285			0.839548		1.66518	1.87803	1.48379	1.30287	1.75452	1.46886		0.547134
ATP2B3	27		0.778205			2.09265	2.02786		1.1245			1.05884			1.15055	0.883114		1.2637			1.53526	0.969657		1.79112	1.14974		1.4782	0.935064		1.83241			1.44716	1.46353		1.05702	1.15578		1.18273	1.16286		1.64022			1.53691			0.772385	0.98109
ATP2B4	54	1.00622	0.956477	0.991974	2.08352	1.91844	1.98251	0.54306	0.480963	0.589236	1.21851	1.30535	1.25088	1.05484	1.05005	1.08241	0.497853	0.545039	0.543545	1.69421	1.76184	1.67284	1.35301	1.35554	1.36401	1.22623	1.16641	1.23478	0.735982	0.759009	0.771841	1.36562	1.33097	1.38303	0.60847	0.563528	0.657344	0.713448	0.62512	0.766243	0.657324	0.638892	0.703773	1.32733	1.45597	1.36483	0.655932	0.626756	0.727963
ATP2C1	54	1.15012	1.2218	1.13374	1.11904	1.01064	1.06767	0.76601	0.780729	0.76465	1.12089	1.19728	1.07825	0.946411	0.93764	0.958127	1.21484	1.15403	1.16504	1.07255	1.06367	1.09121	0.993908	0.902681	0.942555	1.02277	1.03052	1.05272	1.35794	1.34985	1.28881	1.69841	1.69734	1.65168	0.742354	0.697333	0.705104	0.718158	0.705603	0.704074	0.739239	0.743277	0.739439	0.873603	0.914461	0.925286	0.791796	0.812114	0.766946
ATP2C2	54	0.695798	0.675565	0.946444	0.721699	0.774775	0.362319	0.606004	0.710136	0.77484	0.74351	0.825321	0.916887	0.671369	0.693616	0.42603	2.58903	1.84675	1.44369	0.631462	0.630005	0.377204	1.12928	1.20837	1.15018	0.89614	0.84931	0.794885	0.601506	0.642682	0.867902	1.02442	1.16849	1.01897	1.49915	1.27676	2.38759	1.27422	1.20965	1.69353	1.57711	1.26543	1.02439	0.509614	0.403315	0.528846	1.29158	1.27119	1.39569
ATP4A	18			0.805259	0.900227					0.621728			2.334	1.20247					0.695569	0.735251			1.57611			1.32175					0.891307	1.56863			0.997071			0.995072					0.574119			1.95031	1.25412
ATP5A1	54	0.765355	0.766709	0.78393	1.15153	1.01546	1.03785	1.2134	1.22386	1.2	0.920311	0.906881	0.947911	0.90782	0.937945	0.927205	1.203	1.21644	1.18504	1.09834	1.07826	1.09794	0.745652	0.725941	0.687946	0.939623	0.939767	0.933613	0.964922	0.971281	0.968348	0.858525	0.873815	0.85733	1.14082	1.15146	1.15291	1.03857	1.04181	1.0212	1.06032	1.05711	1.04611	0.913615	0.880448	0.890449	1.22459	1.28138	1.26607
ATP5B	54	0.760876	0.758097	0.778012	1.09707	0.979844	0.980978	1.12347	1.15772	1.10639	0.913491	0.92382	0.916518	0.866177	0.88693	0.85277	1.15812	1.17731	1.13621	1.02161	1.01167	1.01917	0.749927	0.759073	0.735888	0.92513	0.906777	0.891992	0.959148	0.962756	0.955113	0.86055	0.856916	0.832287	1.10684	1.12457	1.09072	1.00948	1.01573	0.987047	1.02745	1.03027	1.01852	0.918063	0.915391	0.916643	1.23943	1.23103	1.26161
ATP5C1	54	0.725889	0.771263	0.773988	1.10312	0.974038	0.951609	1.1502	1.24714	1.20044	0.857021	0.881532	0.888389	0.873946	0.876225	0.885581	1.22042	1.19798	1.22327	1.07543	1.02971	1.00791	0.767835	0.779458	0.756224	0.886372	0.846122	0.816189	0.908124	0.895176	0.9061	0.836586	0.810889	0.783405	1.15533	1.12342	1.08241	1.09143	1.03373	0.961601	1.08687	1.03281	1.02867	1.01391	0.962715	1.00342	1.23175	1.20336	1.1489
ATP5D	54	0.78085	0.709127	0.77251	1.20439	0.99659	0.985947	1.20383	1.12047	1.0915	0.99749	0.994095	1.02003	0.928675	0.810018	0.868811	1.24746	1.22198	1.16749	1.09355	0.960122	1.01127	0.961399	0.887459	0.960103	0.919627	0.874657	0.837124	0.930057	0.89638	0.869767	0.895972	0.821231	0.839362	1.09749	1.1114	1.14353	1.10276	1.07684	1.0548	1.15266	1.06045	1.06676	1.00385	0.95097	0.949039	1.19853	1.21387	1.2725
ATP5F1	54	0.819649	0.764135	0.761972	1.11647	0.983214	1.03541	1.14417	1.15577	1.11616	0.946421	0.967484	0.97383	0.891743	0.917177	0.899651	1.24262	1.15403	1.15493	1.09227	1.07849	1.08957	0.784798	0.787602	0.767274	0.933789	0.92854	0.926279	0.955153	0.931978	0.960843	0.89175	0.899933	0.917357	1.09092	1.09434	1.0891	1.08167	1.03017	1.01359	1.0525	1.04052	1.01382	0.956747	0.928081	0.946901	1.22041	1.21345	1.1706
ATP5G2	9	1.21138						1.42228			0.86748						0.83098												1.07438												1.31409			1.42217
ATP5H	54	0.801418	0.7746	0.77999	1.13635	1.02051	1.05907	1.24404	1.26803	1.24618	0.92679	0.972889	0.953287	0.916016	0.89095	0.923275	1.29777	1.30315	1.27835	1.14786	1.08813	1.17052	0.76374	0.79054	0.751197	0.962744	0.944554	0.961647	0.984022	0.970743	0.9687	0.862337	0.909049	0.923558	1.19715	1.1572	1.23867	1.06427	1.08543	1.10477	1.12299	1.12694	1.12206	0.984564	0.942559	0.924368	1.28867	1.30251	1.34279
ATP5I	54	0.80177	0.814631	0.788649	1.13415	0.98824	0.99794	1.18324	1.28618	1.19947	0.971934	1.02165	0.934474	0.940904	0.977506	0.961899	1.15916	1.1994	1.24998	1.08587	1.05701	1.09075	0.782124	0.771311	0.740394	0.902973	0.900672	0.894645	0.89075	0.936992	0.887491	0.881913	0.906723	0.894388	1.08541	1.10983	1.20256	1.02977	1.0331	1.05606	1.17836	1.13285	1.13965	0.926816	0.9783	0.902779	1.1988	1.19077	1.28914
ATP5J	54	0.716924	0.621607	0.67336	1.06493	0.923967	0.858417	1.13866	1.08849	1.12379	0.87216	0.802702	0.845832	0.833758	0.822047	0.781574	1.19175	1.10924	1.17079	1.07663	1.02017	1.03494	0.642074	0.657232	0.594793	0.895707	0.789463	0.928834	0.908985	0.882586	0.984794	0.748299	0.753433	0.73423	1.13519	1.15255	1.17863	1.02978	1.04677	1.00461	1.01613	0.968215	1.00204	0.893394	0.852458	0.876902	1.27219	1.22609	1.33288
ATP5J2	36		0.883329	0.746854	0.910533		0.721974		0.899311	0.803249		1.2943	1.23055	1.03573		0.984482		0.764349	0.799388	1.24067		1.36513	1.03145		0.74328	1.03311		0.816439		0.833619	0.879017	1.01018		0.794321	0.981218		1.0635	1.18845		1.19433		1.22625	1.28945		1.34513	0.991147	0.969223		0.865251
ATP5L	54	0.790468	0.787034	0.814536	1.20409	0.983726	0.970763	1.16862	1.10312	1.19851	0.889913	0.875387	0.898729	0.877748	0.897716	0.813962	1.18997	1.23415	1.16856	1.10493	1.065	1.10412	0.708234	0.631654	0.61928	0.921717	0.865417	0.938189	0.851511	0.992983	0.942985	0.843555	0.779571	0.822707	1.07851	1.13112	1.17125	1.02073	1.00097	0.981855	1.02241	1.06983	1.08926	0.979924	1.00173	0.974524	1.14854	1.15347	1.29021
ATP5O	54	0.75272	0.814881	0.818453	1.12223	1.00314	0.978315	1.21633	1.24258	1.22956	0.955005	0.916245	0.909666	0.948138	0.974582	0.927435	1.31994	1.2366	1.26828	1.12835	1.06466	1.10295	0.72737	0.749625	0.711841	0.934554	0.89928	0.921295	0.977431	0.968454	0.957985	0.896326	0.875647	0.88437	1.10645	1.04263	1.12618	1.04702	1.04447	1.05179	1.06058	1.111	1.1046	0.917156	0.950608	0.951384	1.24945	1.25853	1.32617
ATP5S	54	1.18753	1.41752	1.33579	0.843223	0.746072	0.697341	0.951353	0.928668	1.01594	0.880591	0.86912	0.912703	0.595295	0.541599	0.596575	1.13525	1.24856	1.16548	0.744052	0.785809	0.755492	1.17505	1.09603	1.10451	0.875748	0.763662	0.795276	0.900419	0.937874	0.876711	1.25143	1.17485	1.20799	1.25441	1.2212	1.18553	1.10427	0.994602	1.06401	0.899084	0.992586	1.00487	0.692812	0.722331	0.760858	1.37355	1.22782	1.45446
ATP5SL	54	1.23197	1.16566	1.24179	1.05463	0.817772	0.924038	1.02739	1.10863	1.02906	1.08588	0.949577	0.699828	1.24589	0.922984	1.39343	0.981535	0.821785	0.725008	0.989361	1.14214	1.03346	1.18282	0.998688	1.15716	1.26378	1.23878	1.30907	0.869758	0.805152	0.646202	1.0318	1.16318	1.01462	0.906961	1.07693	1.08962	0.95572	1.14812	1.05157	1.11699	0.996034	1.1961	1.04796	1.03914	1.08262	0.923651	1.13717	0.985382
ATP6AP1	54	0.889166	0.93168	1.01446	1.57394	1.64926	1.46557	0.927393	0.875759	0.928989	0.74202	0.763343	0.730915	0.920247	0.936619	0.893601	1.03788	0.948853	1.03417	0.923813	0.875533	0.847865	0.900208	0.93457	0.883035	1.00428	0.977077	0.975612	1.10538	1.13108	1.10626	1.0869	1.16056	1.12275	1.13449	1.17519	1.12672	1.07817	1.12559	1.03068	1.25813	1.29162	1.26759	0.889561	0.818717	0.819713	0.926135	0.956166	0.898213
ATP6AP2	54	0.920021	0.956594	0.882865	1.92708	1.62001	1.54287	0.785786	0.914909	0.826663	0.619004	0.627596	0.698302	0.818722	0.753515	0.809007	1.03516	0.915358	1.04024	1.0401	0.970613	1.04597	0.818414	0.828167	0.807642	1.00882	0.906026	0.933106	0.997707	1.00375	0.981628	1.06044	0.981491	0.960257	1.05531	0.987489	0.944563	1.07714	1.02423	0.982214	1.17844	1.20932	1.11865	0.797773	0.754292	0.750386	0.897622	0.799182	0.844902
ATP6V0A1	54	0.841659	0.887454	0.843358	1.40341	1.35689	1.31415	0.804209	0.751256	0.781722	0.696359	0.724004	0.733332	1.10278	1.16132	1.08641	1.25392	1.13176	1.22425	0.746059	0.826752	0.818756	0.988628	0.991064	0.993494	0.844201	0.906776	0.841218	1.08056	1.12226	1.08902	1.00912	0.979733	1.03582	1.05771	1.1375	1.08883	1.00606	1.09683	1.05997	1.06701	1.14873	1.20002	1.09544	1.13979	1.10816	1.02009	0.970979	1.00834
ATP6V0A2	54	0.762702	0.727402	0.889994	1.17153	1.21595	1.16485	1.52155	1.61014	1.55444	0.866952	0.741322	0.853275	1.15484	1.197	1.11151	1.10521	1.06519	1.05929	0.66661	0.6829	0.603838	0.882307	0.922751	0.843636	0.817146	0.811239	0.794978	1.08623	1.03976	1.14452	0.908479	0.926237	0.906176	1.06809	1.07107	1.01929	1.0941	1.14261	1.06904	1.24394	1.24132	1.2209	0.925968	0.980852	0.936685	0.748924	0.724637	0.700743
ATP6V0A4	54	1.07783	1.01696	0.937353	0.37847	0.421386	0.388125	0.645737	0.649728	0.609803	1.53659	1.85326	1.33199	0.484197	0.418518	0.655836	4.38072	4.57261	3.91154	0.609569	0.62703	0.554409	0.556699	0.698444	0.590629	0.768394	0.897834	0.962125	0.576223	0.731814	0.578686	0.528806	0.715213	0.539054	1.02622	0.998008	0.907919	0.423821	0.482661	0.420488	0.615266	0.632472	0.682662	0.444373	0.594921	0.643058	3.44678	2.72385	2.72772
ATP6V0C	54	0.793397	1.0875	0.749264	0.807589	1.02066	0.907867	0.808299	0.726764	0.743348	0.666539	0.593849	0.562265	1.00339	0.82755	0.970698	1.17106	1.17593	1.00112	0.395491	0.617823	0.489272	0.785565	0.748223	0.833197	0.436031	0.58383	0.593808	1.00042	0.795139	0.937571	0.918038	0.91053	1.07017	0.413022	0.559927	0.577015	0.805541	0.843815	0.818727	1.15836	0.903568	0.984549	0.758138	0.914397	0.634405	0.54493	0.820296	0.728678
ATP6V0D1	54	0.968095	1.02928	0.962735	1.47118	1.35008	1.23598	0.874475	0.886196	0.898679	0.747938	0.73614	0.790612	1.10419	1.04014	1.0348	1.15682	1.19635	1.21863	0.764694	0.807182	0.774503	0.962482	0.921737	0.897115	0.957698	0.929216	0.879167	0.954577	0.994872	1.01262	1.17434	1.13453	1.14903	1.03565	0.974874	0.976381	1.01154	0.973191	0.949283	1.12578	1.17246	1.13867	0.950122	0.965003	0.985323	1.05604	0.994865	1.10625
ATP6V0D2	8			0.747082						0.838009			0.309522						2.00202												0.151035												2.76268			0.224834
ATP6V1A	54	1.25339	1.25892	1.28054	0.97788	1.04991	1.07505	0.895304	0.852509	0.864088	0.903376	0.841461	0.886418	0.952233	0.97065	0.943725	1.28623	1.34425	1.30332	0.875524	0.92737	0.908781	0.936181	0.976894	0.961207	0.846147	0.879317	0.823177	0.898633	0.858479	0.902753	0.937848	0.964084	0.945006	0.925696	0.944738	0.859816	1.00468	1.02208	0.986312	0.889487	0.807785	0.87573	0.793942	0.715426	0.80204	1.44663	1.48509	1.42819
ATP6V1B1	54	0.380147	0.30498	0.564444	0.719899	0.621975	0.739184	0.365984	0.53178	0.549988	0.782364	0.717653	0.755103	0.667749	0.599076	0.724735	0.499862	0.421444	0.676889	0.78926	0.72648	0.697098	1.04535	1.0051	1.05709	0.654086	0.572146	0.844003	0.443142	0.429071	0.594935	1.59756	1.45785	1.55326	0.914442	0.897338	0.842479	1.18422	1.18858	1.18476	0.705049	0.799062	0.866847	0.250572	0.352171	0.515401	3.96517	5.06288	3.99418
ATP6V1B2	54	0.861173	0.8417	0.864814	1.25498	1.32459	1.29099	1.00588	0.962481	0.944739	0.952265	0.900709	0.890926	1.03943	1.07073	1.04222	1.48004	1.46163	1.41313	0.801755	0.779829	0.765651	0.84324	0.888487	0.88143	0.772196	0.796592	0.778151	0.999128	0.960334	0.994354	0.702388	0.716651	0.69977	0.876777	0.955802	0.890884	0.98014	1.03958	1.02827	0.826842	0.768497	0.830361	0.809205	0.84177	0.829744	1.0247	1.07298	1.06662
ATP6V1C1	54	0.872457	0.873717	0.882834	1.27052	1.23579	1.2928	0.721628	0.710113	0.752833	1.13317	1.24562	1.1643	0.597833	0.623507	0.602361	1.87141	1.93615	1.8929	0.984561	0.971398	0.991028	0.908187	0.922506	0.91394	1.21281	1.17291	1.1652	1.1016	1.1757	1.16326	0.775854	0.77517	0.762794	1.16006	1.19184	1.1859	1.05983	1.06084	1.05644	0.858956	0.895724	0.910244	0.779589	0.797601	0.792188	0.839051	0.856581	0.867295
ATP6V1D	54	0.892427	0.94431	0.906254	1.17111	1.2008	1.23288	1.03108	0.957796	1.0162	0.818845	0.858131	0.871984	1.03842	1.03496	1.01928	1.02289	1.03313	1.09736	0.744248	0.802947	0.848842	1.03388	0.977868	1.0174	0.793916	0.794543	0.815451	0.828195	0.854415	0.786812	0.893922	0.914865	0.931115	0.915075	0.936175	0.870162	1.05926	1.10299	1.11784	0.899632	0.94124	0.894158	0.782916	0.866693	0.810933	1.55008	1.49983	1.48375
ATP6V1E1	54	0.843596	0.890292	0.852819	1.21247	1.1695	1.27471	0.885846	0.835681	0.923142	0.948592	1.0077	1.01442	0.909466	0.993332	0.926297	1.50009	1.49626	1.62064	0.824631	0.858872	0.810563	0.932589	1.0331	0.934952	0.883556	0.979348	0.868554	1.06311	1.12175	1.10985	0.848133	0.830427	0.814046	0.895602	0.996779	1.01151	0.960798	0.990117	0.99976	0.856834	0.828465	0.864059	0.830281	0.842652	0.845529	1.52835	1.50964	1.54504
ATP6V1F	54	0.860214	0.823096	0.828794	0.984418	1.06511	1.00594	0.98452	0.985129	1.08586	0.871878	0.865398	0.936144	0.993914	0.996552	0.897856	1.05739	1.0264	1.17347	0.810743	0.848747	0.837323	0.943397	0.980922	0.904816	0.894566	0.957336	0.850257	0.851136	0.889355	0.902686	1.02351	1.11367	0.966823	0.986607	1.02295	1.00894	1.12813	1.08263	1.05855	1.13405	1.17615	1.25461	0.871899	0.913449	0.868382	1.2579	1.41541	1.44164
ATP6V1G1	54	0.923497	0.875484	0.911296	1.25266	1.18921	1.24475	1.01058	0.912595	0.910117	0.982548	1.026	0.937519	0.987775	0.927718	0.890921	1.31928	1.6124	1.49674	0.892451	0.766492	0.794724	0.954558	0.89967	0.98219	0.893897	0.801877	0.859352	1.09117	1.18229	1.1712	0.846397	0.798461	0.849223	1.02196	1.03512	1.00581	1.12909	0.999335	1.02971	0.83822	0.885187	0.870735	0.898564	0.746574	0.700569	1.48893	1.51079	1.50408
ATP6V1G2	9						1.76126									0.880671						0.838222			1.45434			0.790703						0.964779			0.675653			0.529546									1.1483
ATP6V1H	54	0.966688	0.974477	0.927397	1.18004	1.16592	1.17411	0.860795	0.858774	0.8517	0.862281	0.815305	0.853295	1.13262	1.12237	1.10936	1.18297	1.1192	1.10497	0.84974	0.860592	0.827164	1.02652	1.00564	1.03714	0.628149	0.623963	0.617942	0.780917	0.838459	0.832012	0.902616	0.851381	0.896509	0.911555	0.900814	0.889192	1.02531	1.04488	0.998822	0.89705	0.848597	0.842644	0.873948	0.902449	0.867094	1.68484	1.65117	1.6793
ATP7A	54	0.650677	0.657777	0.663518	1.18658	1.19441	1.13499	0.594724	0.560822	0.611311	0.974624	1.02277	0.974513	1.17593	1.19424	1.12457	1.57837	1.54283	1.57844	0.777992	0.81529	0.828539	0.82557	0.764181	0.784789	1.2929	1.27259	1.34021	1.02144	1.03174	1.00872	2.35804	2.09129	2.35421	0.777837	0.800027	0.824448	0.93969	0.953582	0.860041	0.979791	0.983912	0.947992	0.931139	0.898966	0.934939	0.849113	0.942603	0.856881
ATP7B	45	1.05624	0.952283	1.01131	0.722201		0.408508	1.69006	1.83048	1.47415	1.111	0.83686	0.826318	0.831804		0.919227	2.06825	2.45032	1.94192	0.793598		0.845601	0.541453		0.414541	0.642281		0.6533	0.72497	0.666909	0.628185	0.542661		0.352485	0.802416		0.837509	0.754089		0.933621	0.816884	0.808161	0.781461	0.811948	0.652347	0.734804	0.987014		1.31376
ATP8A1	54	0.600607	0.487612	0.577742	0.802646	0.511629	0.571652	1.68368	1.51075	1.51341	0.843656	0.85578	0.781961	0.805348	0.753677	0.864937	2.16897	1.92673	1.92741	0.64367	0.690071	0.584867	0.677573	0.637006	0.689595	0.646102	0.673319	0.616851	0.820833	0.761531	0.724853	0.841051	0.839719	0.911348	0.990039	0.878586	0.897608	0.965271	0.892991	0.96302	0.787603	0.664561	0.747531	0.53118	0.58224	0.683184	2.80792	3.16313	2.52893
ATP8B1	54	1.06669	1.11167	1.04323	1.35003	1.23547	1.24734	1.06826	1.09165	1.13181	0.901776	0.790062	0.842376	0.520054	0.451038	0.5823	1.47847	1.50547	1.54975	0.602032	0.548892	0.678492	0.793819	0.767294	0.80779	1.15131	1.0494	1.02727	0.943204	0.904629	0.874513	2.32467	2.05133	1.87635	0.883702	0.81875	0.834222	1.52268	1.31513	1.30454	1.25431	1.41657	1.23785	0.526225	0.442759	0.485725	1.00734	0.914862	0.903316
ATP8B2	18	0.632492					1.80827	1.31509			1.5704					0.730864	0.710828					0.604715			0.655197			0.586708	1.04813					0.506414			1.38595			1.06496	0.9693			1.46108					0.766019
ATP9A	54	1.28123	1.36052	1.33589	0.678955	0.607605	0.584112	1.08011	1.04322	1.00443	0.939366	0.833268	0.904337	0.889302	0.820251	0.890988	1.80066	1.98351	1.82158	0.750843	0.722007	0.641614	1.05602	1.12263	1.02861	0.954358	0.966606	0.911035	0.751765	0.608266	0.639409	0.921689	0.979985	0.946436	0.746893	0.707596	0.653613	1.29174	1.32128	1.28224	1.35499	1.42765	1.38446	1.21759	1.24382	1.22876	1.26097	1.28855	1.25056
ATP9B	54	0.801823	0.817493	0.82479	0.402567	0.390353	0.37736	1.3085	1.28542	1.46428	1.71666	1.65071	1.54879	0.946666	0.979511	1.01247	1.13038	0.948423	1.11108	0.98188	0.95316	0.909045	0.580489	0.473361	0.596153	0.725406	0.495757	0.502049	1.85144	1.75046	1.78343	0.831084	0.557617	0.598624	0.872842	0.802996	0.785225	0.921509	0.923281	0.936194	0.963018	0.787321	0.837389	0.96886	0.993938	0.942631	0.862555	0.71261	0.76408
ATPAF1	54	0.728085	0.78399	0.744809	1.07396	0.943818	0.924923	1.1272	1.02943	1.09264	0.885028	0.826691	0.869893	0.771514	0.749012	0.770533	0.776851	0.784497	0.7614	0.933799	0.922023	0.854689	0.90711	0.870544	0.983507	0.845343	0.842078	0.853547	0.890446	0.897246	0.946362	0.975061	0.924509	0.9894	1.0462	0.983812	1.11711	1.0346	0.984856	1.08105	0.988656	0.963629	0.972382	1.04366	1.15548	1.15157	1.79006	1.75183	1.71092
ATPAF2	54	0.91767	1.02524	0.924388	0.893201	0.834049	0.822227	1.05637	1.18221	1.0156	0.756983	0.840121	0.799778	0.758962	0.798057	0.769864	1.57797	1.84619	1.71345	0.997173	0.983283	0.914922	1.19115	1.07253	1.06301	0.802622	0.884966	0.86835	0.685523	0.70412	0.739977	0.881852	0.996091	1.0274	1.18325	1.11307	1.08526	1.37059	1.37342	1.45946	1.42307	1.56643	1.29202	0.816196	0.830688	0.791994	0.783374	0.852106	0.902197
ATPIF1	54	0.678781	0.682642	0.708545	1.48783	1.36633	1.34164	0.796813	0.824257	0.867327	0.370326	0.472761	0.47557	0.712017	0.683835	0.764494	0.949027	0.971569	0.927796	1.2009	1.25376	1.2807	1.32748	1.43816	1.34545	0.992814	0.973508	1.02007	0.518858	0.542667	0.57113	1.30204	1.37002	1.40952	0.904382	0.922572	0.933878	1.17281	1.24795	1.21041	0.995352	1.02159	1.06632	1.37751	1.44	1.4152	1.41048	1.391	1.5262
ATR	54	0.793265	0.840893	0.83326	0.937809	0.969312	0.931408	1.01584	1.08341	1.04748	0.939286	0.986069	0.934509	0.785353	0.798868	0.782133	0.812037	0.805978	0.795923	1.1093	1.15071	1.11283	1.03135	1.02859	1.00535	0.976184	0.970401	0.984578	1.03204	1.02749	1.04177	1.08271	1.12032	1.09603	1.01702	1.05777	1.09109	0.824192	0.855556	0.802425	0.86898	0.903262	0.842237	0.840619	0.884354	0.856772	1.21471	1.30678	1.18757
ATRAID	54	0.987755	0.95142	0.986598	1.2937	1.20123	1.28221	1.02621	1.09632	0.988419	0.773112	0.71951	0.70846	0.72276	0.792492	0.899071	0.980357	0.979584	0.937185	2.19404	1.956	2.41791	0.899199	0.94019	1.00244	0.952714	0.837752	0.964195	1.06139	1.02337	0.947924	0.968159	0.924681	0.93728	0.947887	0.857452	0.942586	1.11059	1.04581	1.04258	1.13988	1.15779	1.07235	1.16385	1.31565	1.20442	0.826703	0.969922	0.830292
ATRIP	54	0.928004	0.868726	0.872795	1.02584	1.00212	1.11274	1.0834	1.13683	1.18252	0.971396	0.917446	1.01388	0.845409	0.858297	0.907594	0.964129	1.00359	0.954082	1.11608	1.08034	1.0977	1.05517	1.0746	1.05196	1.01459	0.957295	0.939582	1.09253	1.03834	1.10491	1.09191	1.04563	1.07834	1.07498	1.05433	1.08673	0.846119	0.88562	0.959659	0.981146	0.975534	0.94482	0.94032	0.925906	0.840963	1.23587	1.18312	1.1674
ATRN	54	0.947298	0.884795	0.874709	1.13809	1.02168	0.993957	1.04579	1.0811	1.03811	0.840103	0.849761	0.775633	1.42137	1.38756	1.3471	0.880596	0.888595	0.876676	1.38684	1.32229	1.38662	1.00452	0.943014	0.953782	1.00389	1.04898	0.995752	1.43139	1.50098	1.49907	0.658376	0.594845	0.690798	0.906244	0.931347	0.899921	0.778678	0.797413	0.789262	0.838539	0.799667	0.847745	0.845361	0.896248	0.863328	1.03778	1.06687	1.06903
ATRX	54	0.669147	0.662232	0.67186	1.02244	0.985469	0.904728	0.677378	0.678148	0.709902	0.981008	0.994635	0.96454	1.61515	1.64016	1.58381	0.785424	0.704258	0.745252	1.25762	1.25909	1.26423	0.808021	0.790642	0.815712	0.891942	0.988602	0.93173	0.888375	0.871076	0.854716	1.00756	1.03354	1.03155	0.915404	0.942106	0.917695	1.24837	1.31084	1.24273	1.33078	1.37523	1.31346	1.52598	1.62274	1.50315	0.834783	0.823254	0.788543
ATXN1	54	1.52898	1.67925	1.46605	0.8498	0.87531	0.763757	0.591625	0.636825	0.572207	1.05715	1.20034	1.09907	0.532566	0.749475	0.550941	1.99606	2.04577	1.61484	0.734691	0.918433	0.62631	0.839286	0.930884	0.791542	0.967989	1.02824	0.971476	0.882269	1.00153	0.875363	1.32859	1.3282	1.31227	0.710316	0.834276	0.732529	1.51171	1.36209	1.73049	1.35254	1.47443	1.29925	0.987513	0.987793	0.933885	0.90563	0.98028	0.919554
ATXN10	54	0.607561	0.581971	0.586634	1.00352	1.05186	1.04113	1.90024	1.89689	1.94276	1.61308	1.61479	1.66368	1.12478	1.13971	1.10693	0.980985	1.03356	0.992508	1.05674	1.01269	0.995034	0.849057	0.852543	0.858146	0.805277	0.82056	0.793949	1.00986	1.05698	1.0106	1.05544	1.03674	1.00045	1.17268	1.11703	1.11641	0.689313	0.717032	0.658406	0.69559	0.688972	0.693776	0.91065	0.978213	0.938598	0.694839	0.735627	0.711257
ATXN1L	54	1.36386	1.51275	1.2674	0.83486	0.872351	0.900685	0.897478	0.868407	1.01325	1.02402	0.97395	1.00283	0.943729	0.93413	0.925058	1.02035	0.927553	0.955807	0.848564	0.867856	0.911367	1.19946	1.17024	1.23414	0.981591	1.00319	0.95065	1.01449	1.11869	1.18187	1.23715	1.31188	1.12987	1.20246	1.42645	1.25563	1.01135	1.0776	1.04655	1.01741	1.01187	0.958842	0.786257	0.734533	0.883496	0.742119	0.671977	0.889897
ATXN2	54	1.46063	1.47468	1.40211	1.04653	1.06468	1.05914	1.0232	1.07243	1.04655	1.05496	1.10761	1.11122	0.950175	0.92677	0.854344	0.944654	0.947327	0.927132	1.19602	1.17914	1.22742	1.04192	1.08768	1.12887	1.02961	1.06603	1.05914	1.39387	1.46246	1.34542	0.820501	0.817067	0.802213	0.940676	0.98775	0.965151	0.830673	0.82602	0.872255	0.871468	0.879777	0.888151	0.957989	1.03125	1.02975	1.02413	1.07151	1.11315
ATXN2L	54	0.957363	0.919546	0.924467	0.879006	0.933241	0.933019	1.14888	1.14904	1.13311	1.12896	1.17295	1.10947	1.095	1.11394	1.1032	0.93773	0.93623	0.92579	0.992712	0.93609	0.975149	0.965976	0.976418	0.97445	1.0111	1.01936	1.04308	1.20086	1.22039	1.16317	0.972467	0.924805	0.898702	1.23626	1.25138	1.26323	1.0835	1.08245	1.12521	1.0979	1.13374	1.07037	1.008	0.974229	1.01899	0.819267	0.838446	0.818731
ATXN3	54	1.03019	1.09592	1.05527	0.901452	0.916772	0.805413	0.783686	0.729816	0.683854	1.07598	1.17417	1.09923	1.04585	1.07993	0.975236	0.689079	0.727767	0.616226	0.717844	0.71784	0.807226	0.800895	0.807235	0.762007	0.908323	0.934192	0.907788	1.01033	1.05721	0.989661	1.02222	1.02316	0.97874	1.5361	1.63044	1.68115	1.34162	1.41254	1.43783	1.09766	1.15253	1.1059	1.00658	1.20894	1.00977	0.764421	0.659563	0.701342
ATXN7	54	1.28745	1.19332	1.17813	1.07476	1.02094	0.816087	1.25902	1.22546	1.16236	0.959631	1.06438	0.892682	0.986253	0.93268	0.890227	0.903422	0.799732	0.900085	1.85787	1.48652	1.45375	0.950693	0.860071	0.915591	1.15425	1.16668	0.940067	0.824079	0.775703	0.829382	0.94436	1.08589	0.881982	1.39599	1.26761	1.34393	1.2845	1.40794	1.20278	1.58898	1.284	1.42955	0.686221	0.799534	0.724966	0.870542	0.867769	0.986726
ATXN7L1	54	0.797649	0.691371	1.11411	0.956834	0.847098	1.02422	0.842678	0.887801	1.35628	1.28017	0.927302	1.00292	0.961456	0.956321	0.949736	1.71236	1.09081	1.11048	1.39633	1.41201	1.56956	0.96198	0.74575	0.809437	1.09427	1.1326	1.40418	0.569498	0.67626	0.968118	0.841122	0.872815	0.841435	1.05186	1.30167	1.39013	1.0946	1.16025	1.02155	1.19356	0.821245	1.34383	0.662647	1.1792	1.14269	1.13368	0.970024	1.11535
ATXN7L2	54	0.973507	0.814936	0.96469	0.836634	0.974613	0.712843	0.795542	0.850733	1.00587	1.00472	1.17571	1.11598	0.725891	0.774711	0.784325	0.830589	0.820004	0.739342	0.735702	0.911672	0.65679	1.04625	1.25144	1.03299	0.903823	1.01965	0.959251	1.71291	1.46879	1.60101	1.13112	1.3421	0.986137	1.13076	1.04225	1.19574	0.960942	0.966559	0.912257	0.925176	0.941925	1.14659	1.00736	0.951725	1.04972	0.732735	0.794112	0.561445
ATXN7L3	54	0.892054	0.81037	0.89294	0.83055	0.814363	0.810812	1.11711	1.16291	1.10939	1.23203	1.47741	1.22447	1.25307	1.07193	1.1854	0.86096	0.889823	0.903386	1.21376	1.23175	1.23306	1.016	0.753833	0.830511	1.08844	1.199	1.21142	1.0023	1.04956	0.907899	0.891344	0.804437	0.865248	1.09714	1.15572	1.23429	0.853942	0.914639	0.871159	0.988948	0.979865	1.0723	1.00159	1.24924	1.05249	0.752606	0.756463	0.625904
ATXN7L3B	54	0.616898	0.584865	0.554155	1.11313	0.75933	0.972203	1.0415	1.19861	0.928652	0.718663	0.768144	0.804443	1.33544	1.25732	1.29543	0.661286	0.662461	0.711658	0.819896	0.825796	0.829125	0.984808	0.951809	1.01951	0.807277	1.06947	0.932258	1.06924	0.955867	0.773183	0.797294	0.960837	0.85009	1.6389	2.50052	2.05535	1.51675	1.77239	1.7485	1.23952	1.29383	1.40726	0.854238	0.862883	0.834917	0.624422	0.664639	0.645075
AUH	54	0.633183	0.669757	0.539618	0.900747	0.859071	0.831605	1.02915	0.991403	1.0142	0.862648	0.690134	0.706444	0.763056	0.823905	0.725731	1.5428	1.37116	1.44451	0.948956	0.899291	0.892464	0.76314	0.956313	0.715233	1.22453	1.17638	1.22988	0.788513	0.798725	0.802614	1.50417	1.47135	1.68563	0.882723	0.878532	0.815871	0.963489	0.911841	0.88079	0.925338	0.930698	0.880583	0.963261	0.942269	0.985869	2.40704	1.83773	2.13174
AUNIP	45	1.59612	1.80712	1.46495		1.22483	1.31532	1.47101	2.01198	1.40524	1.13032	0.991521	1.11964		0.962677	0.924524	0.639013	0.179503	0.92005		0.762177	0.717119		1.09473	1.3927		1.4385	1.60304	0.940977	0.917608	1.03012		1.25851	1.38177		0.988618	0.900234		0.62469	0.684703	0.736254	0.69606	0.869225	0.922031	0.943903	0.856497		0.89993	0.79665
AUP1	54	0.850008	0.933151	0.900577	0.930182	0.980627	0.878404	1.00859	0.924658	0.919396	1.02	1.0115	1.03399	0.899758	0.943231	0.878353	1.03848	0.860849	0.950874	1.055	1.08247	1.00543	0.982062	1.03694	0.965188	1.39615	1.41063	1.21734	1.02709	0.923973	1.07911	0.810689	0.856488	0.776592	0.866761	0.918751	0.821628	0.929868	0.99636	0.935384	1.10692	1.01317	1.01354	1.54552	1.46054	1.46274	1.34225	1.33761	1.26069
AURKA	54	1.26074	1.30036	1.15802	1.17003	1.23282	1.17658	0.895394	0.926231	0.887021	0.849019	0.838757	0.834548	0.710229	0.679446	0.629215	1.1286	1.1124	1.10998	1.07199	1.01398	1.06887	1.07265	1.08912	1.02612	1.58536	1.31324	1.58867	1.00368	0.943143	0.986744	0.62861	0.709251	0.66634	0.984454	0.865102	0.945068	0.763164	0.748261	0.785521	0.813566	0.754548	0.76504	1.60472	1.64748	1.58123	0.94858	0.903478	0.980521
AURKAIP1	45	1.09251	1.04633	1.08019		1.17575	1.14429	1.20125	1.16546	1.17956	0.898258	0.930846	0.923896		1.31715	1.06532	1.14576	1.01564	0.996594		1.17292	0.756493		0.984005	0.856077		0.995479	1.19128	0.869764	0.91328	0.895353		1.02271	0.964266		1.12093	1.25495		1.09087	1.19902	1.34661	1.32074	1.15175	0.985829	1.01078	0.994783		1.49094	1.64786
AURKB	54	0.982137	1.05753	1.15588	1.41445	1.1907	1.27827	1.16798	1.38413	1.18655	1.07289	1.14674	1.07429	1.09216	1.13332	0.986443	0.563746	0.578401	0.570229	1.19517	1.05675	1.1381	1.05412	1.00821	1.00393	1.48425	1.39415	1.43325	0.942201	1.0948	0.969401	1.15104	1.0209	1.14943	1.03421	0.981295	0.955516	0.867547	0.883993	0.895537	0.951755	0.924194	0.960213	0.892786	0.859827	0.910917	0.705563	0.588577	0.605022
AUTS2	54	0.528655	0.251916	0.567798	0.836612	0.795749	1.01692	0.574485	0.342508	0.588724	0.710058	0.455639	0.691177	2.42919	2.23168	1.90571	0.916005	0.694261	0.919039	1.66909	1.7256	1.68347	0.699823	0.581958	0.859204	0.926731	0.90187	1.17897	0.557025	0.452248	0.726869	2.28	2.14256	2.12212	0.637172	0.587817	0.819511	0.595934	0.451632	0.592946	0.510189	0.286904	0.621347	0.665608	0.61471	0.777094	0.62516	0.552428	0.843239
AVEN	54	1.20858	1.39982	1.29299	0.980083	0.996549	1.05689	1.53449	1.90346	1.78472	0.813944	0.78849	0.828452	0.761182	0.685298	0.719176	0.91948	0.793291	0.878821	0.881457	0.779978	0.838225	1.06062	1.02426	1.05879	1.19176	1.20035	1.21884	0.863515	0.896361	0.887555	0.991711	1.04446	1.06798	0.865463	0.911076	0.88867	0.952654	0.914685	0.958091	0.860019	0.932275	0.985617	1.27954	1.45516	1.30108	1.16596	1.15862	1.25959
AVL9	54	0.780274	0.736307	0.828206	0.893466	0.859338	0.796082	0.894968	0.848509	0.86658	0.625819	0.473132	0.609303	1.05975	1.04506	1.02976	1.36155	1.2781	1.37059	0.951428	0.908457	0.894066	0.850746	0.76106	0.878519	0.994899	0.915449	0.914108	0.660466	0.522399	0.585706	1.26776	1.23128	1.33442	1.12153	1.18641	1.27489	1.32022	1.42663	1.47498	1.45691	1.62553	1.62365	0.963017	0.978129	0.951512	1.28095	1.35882	1.52823
AVPI1	18	0.867121				0.914234		0.453309			0.859754				0.89576		1.35171				0.737144			0.777817			1.00603		0.598237				1.12322			1.27301			1.35317		1.45418			0.591741				1.84153
AXIN1	54	0.838619	0.908441	0.88819	0.853909	0.889168	0.746819	1.03341	1.0732	1.11146	0.794328	1.00379	0.839788	1.08037	1.00384	0.920961	0.857289	0.810655	0.782202	1.11529	1.12325	1.28891	1.13066	1.08607	1.09707	1.26681	1.17144	1.1859	1.10244	1.02529	1.0915	1.10783	1.03904	1.06222	1.16388	1.11331	1.18224	0.976371	0.932868	1.05558	1.06809	0.948286	1.14892	0.794119	0.870523	0.766433	1.21581	1.24531	1.39667
AXL	54	0.671562	0.57857	0.430769	3.14083	2.18734	2.75064	0.636195	0.587827	0.645556	2.54949	3.11609	2.61872	0.347423	0.576254	0.550661	0.558562	0.491712	0.67816	0.299391	0.738672	0.428644	1.78196	1.40457	1.551	0.285284	0.516088	0.39795	1.34587	1.78927	1.73168	0.246714	0.546315	0.442719	0.233002	0.405837	0.350229	0.219176	0.491628	0.327561	0.575213	0.389808	0.436327	1.46635	1.74298	1.60312	0.218202	0.403137	0.347105
AZGP1	54	0.482905	0.392373	0.431859	0.803807	0.597617	0.668388	0.472403	0.347193	0.422063	2.12821	2.43913	1.97215	0.572319	0.517948	0.588236	1.54409	1.59063	1.62788	2.43401	2.3244	2.46263	0.787701	0.703647	0.78687	0.901631	0.718568	0.831608	0.65454	0.535611	0.413018	3.50722	3.05539	3.58253	0.605974	0.490009	0.524623	0.548042	0.456814	0.506454	0.406965	0.29729	0.348812	0.437235	0.392783	0.366114	0.617953	0.594273	0.631641
AZI1	54	0.893729	0.887961	0.910777	0.959938	0.985389	0.96467	1.28778	1.30475	1.27999	1.1147	1.13651	1.0687	1.30017	1.25386	1.20844	0.843632	0.84356	0.880106	0.755115	0.853538	0.735263	1.00425	0.996547	1.00761	0.887094	0.943153	0.876522	1.40152	1.46043	1.38927	0.867814	0.896392	0.869229	1.26234	1.26585	1.25632	1.05901	1.09651	1.06545	1.26784	1.29847	1.28388	0.89088	0.944563	0.926664	0.879266	0.889713	0.860883
AZI2	54	1.11033	1.14479	1.02225	1.58109	1.52171	1.7162	1.09769	1.13242	1.20273	1.18767	1.16034	1.2352	0.659032	0.603151	0.613145	1.41056	1.23077	1.27431	1.00709	0.887853	1.00692	0.887218	0.801145	0.758662	0.859189	0.817916	0.899756	1.11742	1.07672	1.10894	0.7866	0.809989	0.725457	1.05886	1.14758	1.10828	0.923883	0.932939	0.906056	0.946279	0.989593	1.02945	0.985324	1.09356	1.01345	1.03918	0.949268	0.973146
AZIN1	54	0.973641	1.03707	1.18438	0.938525	0.730025	1.12404	1.01489	0.770065	0.904301	1.19629	1.29611	1.56303	1.00333	0.953354	1.01407	1.43481	1.46792	1.29129	1.04555	0.834073	0.735435	1.05213	0.808711	0.89004	0.996582	1.13511	1.16805	1.413	1.61834	1.38087	0.984287	0.693018	0.738567	1.04868	1.08232	1.35263	0.87294	0.703575	0.926215	0.881862	0.617234	0.730394	0.818154	0.513093	0.855552	1.27353	0.688843	0.627075
B2M	54	0.883603	0.820476	0.77478	1.48122	1.62233	1.44767	0.465791	0.35571	0.402537	0.728843	0.645503	0.652195	1.80102	1.85935	1.97479	0.485735	0.462587	0.480436	1.11209	1.19034	1.18163	1.70923	1.57746	1.88566	0.894727	0.960579	0.856634	1.76205	1.70276	1.67314	2.28521	2.04233	2.18687	0.440474	0.585449	0.552358	0.455386	0.572733	0.322947	0.491816	0.427301	0.475977	0.30469	0.266612	0.327387	0.556011	0.682034	0.52029
B3GALNT1	54	0.496256	0.622904	0.592204	0.776142	0.635524	0.630085	0.765974	0.992985	0.830039	1.01275	0.6722	0.685883	0.847774	0.489734	0.727297	1.35913	1.30097	1.15666	1.11512	1.20178	1.12871	0.897557	0.640759	0.922698	0.712818	0.535994	0.786099	0.830466	0.93327	0.924673	0.798469	0.658675	0.86153	0.977555	1.24674	1.22774	1.22974	1.18788	1.35876	2.6454	2.14995	1.97906	0.895385	0.964694	0.832691	0.677302	0.585202	0.680461
B3GALNT2	54	1.32303	1.25222	1.45725	1.43614	1.16398	0.994822	1.2498	1.15063	1.02574	1.08812	1.09218	1.0744	1.68545	1.30238	1.66956	0.893349	0.945875	0.987268	1.02382	1.05439	0.964301	1.68275	1.7681	1.49442	1.19153	0.987643	1.09181	1.14752	1.17222	1.10173	0.817427	0.694565	0.662418	0.739914	0.659981	0.701136	0.41973	0.566181	0.497117	0.758904	0.718878	0.771225	1.38162	1.70095	1.37182	0.542845	0.504254	0.457091
B3GALT4	27		1.05624		1.09939	0.790149			0.834207			1.01962		0.690865	0.7895			0.616548		0.551027	0.648277		0.919714	0.756446		0.980596	0.679323			1.007		1.39768	1.22737		0.681182	0.965182		1.11493	1.27493			1.86024			0.898788		0.963971	0.876334
B3GALT5	9				1.28956									1.60138						0.749915			1.44208			1.2178						1.1416			0.968331			0.780773									1.20818
B3GALT6	54	0.89501	0.768715	0.75511	2.10492	1.6464	1.57915	1.23404	1.15468	1.18172	0.767377	0.842646	0.905603	1.32718	1.34527	1.33591	0.86629	0.707662	0.726649	0.645803	0.824739	0.693296	0.809452	0.809899	0.917206	0.851764	0.82589	0.860713	0.917556	0.815384	0.912297	1.18077	1.1476	1.17632	0.737647	0.674426	0.768774	0.931421	1.00737	0.919444	1.25027	1.16098	1.11071	1.53872	1.48591	1.35777	0.777617	0.765461	0.722307
B3GALTL	54	1.63869	1.82459	1.56109	1.38757	1.65639	1.40835	1.05671	0.993332	0.997334	1.16855	1.2128	1.0181	0.877519	0.967227	0.993083	0.67326	0.764968	0.732162	1.19626	1.08989	1.15772	0.995173	1.04851	0.99691	0.881026	0.81193	0.883244	1.28422	1.19364	1.19233	1.09144	1.10089	1.05059	1.02564	0.994561	1.04909	0.75959	0.704646	0.769207	0.666679	0.716385	0.685394	0.932352	0.903171	0.899812	0.744246	0.642956	0.742329
B3GAT3	54	0.766578	0.58739	0.799044	1.71271	1.73268	1.70607	1.03488	1.14292	1.08136	0.691768	0.68022	0.870339	1.09507	1.12375	1.08061	1.40837	1.57216	1.49142	1.03332	1.05687	1.00228	0.831859	0.816099	0.862844	0.671528	0.70398	0.656235	0.861142	0.86399	0.90925	1.00628	0.985402	0.96753	0.741393	0.793101	0.657019	1.16726	1.26682	1.10936	1.27797	1.4263	1.31683	1.29241	1.43864	1.32964	0.790293	0.84836	0.791065
B3GNT1	54	0.772356	0.799563	0.848785	1.18191	1.16203	1.12877	1.13251	1.24443	1.19696	0.823213	0.972517	0.831446	1.0901	0.956439	0.952456	0.998588	1.03904	1.03279	1.13187	1.02816	1.19414	0.947944	0.826133	0.802879	0.903245	0.802503	0.826902	0.722571	0.732505	0.650341	0.946533	0.710022	0.855448	1.13732	1.2662	1.26507	0.922212	0.845258	0.94556	0.944276	0.947312	0.895009	1.01336	1.21663	1.14452	1.01499	0.932932	1.04332
B3GNT2	54	0.929677	0.872526	1.01769	0.812325	0.833868	0.857003	0.845529	0.767361	0.897702	0.730192	0.868576	0.652699	1.12857	1.28871	1.27417	1.18841	1.1071	0.95398	0.672926	0.64999	0.698963	0.860984	0.905122	0.842327	1.07759	1.01693	1.10862	0.821523	0.821574	0.769963	0.977056	1.10313	1.16846	1.14296	1.13531	1.20335	0.878878	0.914491	1.03511	0.924115	0.992859	0.94894	1.05045	1.09854	1.01136	1.20483	1.153	1.18013
B3GNT3	54	1.82286	1.88769	1.79424	0.639028	0.43854	0.595349	0.493953	0.566944	0.419796	1.47129	1.68321	1.35387	0.616095	0.495117	0.887244	0.704438	0.661466	0.468076	1.14732	1.39157	1.37853	1.86457	2.03759	1.63439	1.12008	1.30926	1.13381	0.478157	0.411581	0.398369	1.05733	0.883762	0.960643	0.835841	0.62028	0.785417	0.60204	0.606562	0.55937	0.599763	0.773536	0.50749	0.634673	0.49024	0.247481	1.3863	1.43474	1.49801
B3GNT5	27				1.07737	2.01702	2.01039							0.955016	1.04102	1.02393				0.816906	0.88227	0.924322	0.832524	1.42562	1.04393	0.917454	1.24315	1.17382				1.01829	1.38918	1.23104	0.949691	0.734538	0.644552	0.950305	0.569317	0.851864							0.912406	0.832832	0.583095
B3GNT9	35	0.35989	0.289874	0.783657		2.48483		0.255834	0.0999961	0.828695	0.519426	0.382826	0.84763		0.901903		0.371522	0.296872	0.790553		0.237017			1.42673			NA		1.76747	1.72814	1.21342		5.71679			0.154708			0.378847		0.903192	0.814199	0.786318	1.94059	1.95586	1.57913		0.0770948
B3GNTL1	45	0.982965	0.880236	0.796335	1.40339	0.685794		1.18863	1.03366	1.28757	1.22895	1.70782	1.26091	0.769393	0.373385		0.738379	0.987184	0.742704	1.04863	1.01203		1.18453	1.14517		0.578497	0.688491		1.6604	1.51917	1.64831	0.855493	0.854581		1.07905	0.834886		0.930078	1.0391		1.0354	1.18917	1.14105	1.16881	1.03472	1.14245	0.922161	0.511272
B4GALNT1	54	0.713373	0.831729	0.735276	1.19201	1.37239	1.26342	1.02845	0.974169	0.950473	1.35694	1.47761	1.41263	1.7013	1.7872	1.50532	0.595336	0.618761	0.726745	0.865952	1.04072	1.08186	0.600574	0.722467	0.854011	0.4784	0.697247	0.714244	1.26889	1.72982	1.51937	0.558814	0.728388	0.886461	0.838624	0.980893	1.06179	0.512474	0.613036	0.738749	1.08779	1.05365	1.06968	1.28466	1.31058	1.21065	0.389527	0.593249	0.763123
B4GALNT3	27			1.4808	0.788012		0.966473			0.939836			1.0792	1.78324		1.57519			1.37972	1.10954		0.879487	1.18934		1.09678	1.3535		1.29088			1.14404	1.3472		1.37138	0.886014		0.873591	0.810558		0.923444			0.947316			0.857956	1.05181		0.980166
B4GALNT4	18				1.20284	0.78392								2.92017	1.20531					4.46307	1.8887		0.312051	0.717117		0.485916	0.560545					0.532102	0.581575		0.77145	0.434751		0.588285	0.809354								0.271176	0.435584
B4GALT1	54	1.52998	1.68092	1.47264	2.03404	1.94729	1.83793	0.734026	0.65831	0.705964	0.806157	0.739269	0.777726	1.37846	1.45863	1.36244	0.722152	0.850255	0.76846	0.783267	0.794248	0.808447	1.02723	0.988001	1.01039	1.05192	1.10343	1.08367	0.624036	0.584343	0.640591	1.42341	1.44059	1.39818	0.742978	0.835804	0.766704	0.632565	0.648231	0.639275	0.574069	0.587864	0.575015	0.793161	0.811784	0.847374	1.46611	1.41815	1.34183
B4GALT2	45	0.635042		0.810139	1.05905	1.12185	0.988457	0.907964		1.18968	0.965736		0.98592	1.48993	1.86969	1.28054	0.666331		0.684197	1.25233	1.26076	1.3466	0.603142	0.689347	0.832737	0.6915	0.805306	0.877774	1.04402		0.895077	1.05471	0.971692	1.07641	0.814438	0.66515	0.817093	0.715736	0.557823	0.516708	0.708351		0.771839	1.30231		1.13579	0.999414	0.949033	0.860086
B4GALT3	54	0.887795	0.893701	0.962983	1.07561	1.14014	1.06797	0.769392	0.687848	0.753918	0.825682	0.712124	0.947165	1.52684	1.89692	2.11787	0.777528	1.16467	1.04088	1.27028	1.19406	1.54919	1.05919	0.985805	1.14408	1.15528	1.30773	1.50947	1.00597	1.03512	0.93069	1.1268	1.18693	1.28751	1.05233	1.01986	1.26844	0.799465	0.643532	0.763504	0.6464	0.729428	0.761199	0.647396	0.799641	0.713231	1.09635	1.05408	1.24938
B4GALT4	54	2.48775	2.42993	2.108	0.813515	0.802224	0.843115	1.32145	1.26292	1.21983	1.02773	0.986702	0.949753	0.836359	0.814117	0.878282	1.06707	1.20919	1.0103	0.877809	0.950179	0.797572	2.07799	1.82888	1.86228	1.22785	1.20548	1.15895	0.785494	0.800075	0.790896	1.02241	0.978221	0.987149	0.754979	0.711258	0.748735	0.862365	0.849207	0.922219	0.879898	0.843844	0.850122	0.69763	0.704066	0.69054	0.57647	0.593223	0.663561
B4GALT5	54	0.98898	0.836549	0.895587	1.25106	1.45509	1.42288	1.02641	1.11838	1.24721	0.693967	0.820893	0.481764	0.911419	1.10101	1.21718	1.09964	1.11938	1.17561	1.10858	0.975283	1.16219	1.10602	0.973396	1.1234	0.954902	1.12255	1.15656	0.811909	0.614183	0.650047	1.40365	1.54298	2.01365	0.532211	0.641981	0.632212	0.524291	0.54753	0.434394	0.650589	0.598157	0.729295	1.16717	1.27726	1.38339	0.979333	1.02461	1.22256
B4GALT7	54	0.841013	0.994818	1.07957	0.837342	0.68389	1.01172	0.935029	1.16476	1.14289	0.968818	1.23038	1.22555	0.687481	0.779633	0.682556	0.810409	0.885464	0.917067	1.1199	1.62724	1.22335	1.17028	1.33731	1.23158	0.690279	0.60466	0.833374	0.833771	0.949325	0.938158	0.844724	0.788769	0.873765	1.02097	1.13832	1.09161	0.988627	0.994496	0.916269	0.919762	0.954537	0.96137	0.980441	1.22983	1.08732	0.84518	0.923908	0.953445
B9D2	18		0.549929		1.36645				1.78512			1.11317		0.735174				0.184925		1.18682			1.09124			0.880216				0.785553		0.735733			0.912379			1.03788				1.0909			0.723942		0.682013
BABAM1	54	1.06366	1.16395	1.04985	0.827809	0.875572	0.891502	0.936695	0.964413	0.882858	1.13839	1.09982	1.04135	0.885378	0.848004	1.01446	1.29616	1.42939	1.27677	0.772249	0.838758	0.941466	1.1618	1.14293	1.17621	0.960623	0.851574	0.961128	0.861188	0.90629	0.88264	1.08768	1.09195	1.17364	1.0276	0.990516	1.03508	0.997979	1.01901	1.04322	1.0187	0.973906	1.01437	1.06543	1.13758	1.07887	0.970693	0.933578	0.958896
BACE1	45	0.719947	0.402251	0.573612	2.32218	4.031		0.892082	0.669391	0.814411	0.978214	0.858087	0.89668	0.977723	1.17929		0.978636	0.645052	0.581447	0.776655	0.695921		0.823347	0.80023		0.851844	1.08466		0.829759	0.711869	1.23506	0.855206	1.00557		1.00943	0.702225		0.852359	0.730791		1.14815	0.975653	1.09252	1.76868	1.67976	1.93141	0.754624	0.273293
BACE2	54	1.14324	1.42705	1.29417	0.619599	0.756286	0.576958	0.567461	0.406602	0.39971	1.25109	1.43411	1.1846	0.954931	0.998109	1.0024	0.6088	0.459098	0.462048	1.40881	1.45146	1.47445	1.0437	0.998183	1.00511	1.34563	1.22004	1.53685	0.799453	0.809887	0.773982	1.56749	1.39522	1.81761	0.691771	0.74018	0.710713	0.581809	0.567969	0.489778	0.753595	0.776938	0.616149	0.590851	0.469483	0.394373	1.52342	1.26754	1.59983
BACH1	54	1.14002	1.13961	1.13319	1.03871	1.07425	1.15568	1.58309	1.57391	1.40262	1.01924	1.01927	1.06408	0.668097	0.761171	0.759029	0.87478	0.960553	0.872907	1.1175	1.23107	1.2551	1.16329	1.08568	1.12315	1.11056	1.17963	1.1362	1.11731	1.09587	1.14059	0.868477	0.784522	0.78015	0.896008	0.833068	0.90383	0.816641	0.727042	0.767694	0.762494	0.725742	0.729697	1.44376	1.38468	1.29515	0.756067	0.754293	0.795657
BACH2	9		1.21309						0.733697			1.17419						1.28216												0.788643												0.608681			0.947423
BAD	54	0.782584	0.759614	0.716684	0.946895	0.947146	0.933768	0.904919	0.842943	0.788704	1.21324	1.18136	1.09749	0.955075	0.822586	0.901873	1.93491	2.0351	2.0442	0.865795	0.774379	0.807726	1.03589	0.919546	0.993098	0.916986	0.856551	0.911497	0.91815	0.961044	0.794619	0.802338	0.726809	0.722022	0.956715	0.963124	1.02566	0.903497	0.845552	0.892874	0.920217	0.940136	0.886165	1.12672	1.07268	1.09302	1.08856	1.05521	1.22691
BAG1	54	1.01498	0.919225	0.986311	1.11002	1.19131	1.22894	0.917398	0.905049	0.973462	0.987948	1.02763	1.03999	1.14662	1.13861	1.24568	0.91992	0.86232	0.865279	0.794545	0.878758	0.799462	1.08979	1.08731	1.17285	0.913754	0.940419	0.959334	0.776219	0.723372	0.794277	0.989506	1.01304	1.10066	1.07098	1.29422	1.25794	0.860871	1.03502	0.909376	1.52796	1.49867	1.63202	0.692942	0.705718	0.775276	1.54231	1.6199	1.82239
BAG2	54	0.595362	0.544887	0.578881	1.75848	1.60097	1.66597	1.636	1.8575	1.83278	1.21535	1.34659	1.32363	1.07047	1.00632	1.09179	0.630714	0.509994	0.642287	1.2361	1.32423	1.24278	1.59103	1.57126	1.59502	0.860211	0.858458	0.923263	1.18401	1.30971	1.19186	0.57971	0.648981	0.61835	0.628515	0.716902	0.666173	0.505777	0.635308	0.56235	0.720277	0.649402	0.69782	1.26138	1.39898	1.26989	0.319351	0.502374	0.426185
BAG3	54	0.783723	0.757133	0.706003	1.06104	1.04189	1.11698	0.799407	0.806167	0.73415	0.940656	0.964523	0.880014	0.701048	0.679788	0.627213	0.875335	0.850425	0.836024	0.733506	0.707545	0.689558	1.01075	1.01254	1.04881	1.25594	1.2781	1.26273	0.847579	0.893168	0.910093	1.10117	1.06056	1.13628	1.84333	1.86997	2.00063	1.33642	1.36092	1.43518	2.13276	2.23861	2.15834	0.851281	0.887882	0.855015	0.871874	0.924473	0.890019
BAG4	54	0.939091	0.800763	0.818778	1.23591	1.18869	1.30055	1.30347	1.27716	1.16938	0.888551	0.919442	0.893832	1.22807	1.05142	1.11053	0.784119	0.891081	0.826251	1.76612	1.6659	1.71725	0.760803	0.749679	0.834156	0.753505	0.689895	0.768806	1.49548	1.4811	1.43381	0.57649	0.555036	0.574083	0.886989	0.753879	0.840112	0.905177	0.797966	0.886059	0.880828	0.880197	0.750822	0.951781	0.962757	0.893112	0.630891	0.634678	0.607551
BAG5	54	0.989883	0.992644	1.02512	1.08837	1.11007	1.02202	0.835755	0.836789	0.859331	1.03087	1.05745	1.05126	1.2495	1.2343	1.22147	0.743972	0.758997	0.719737	0.685352	0.671502	0.643063	1.09299	1.09852	1.06261	1.0099	1.05393	0.968048	0.952867	0.984752	0.965973	1.0503	1.03645	1.02568	1.39	1.4641	1.44787	1.1708	1.20064	1.15465	1.13646	1.1584	1.21279	1.07222	1.08813	1.07019	0.849055	0.844289	0.789566
BAG6	54	1.01725	0.979881	0.991429	0.955064	0.94989	0.969851	0.891143	0.931685	0.878821	0.87053	0.888674	0.877686	1.02496	1.06607	1.07525	1.27298	1.29713	1.23118	0.84171	0.884223	0.850157	0.969862	1.00001	1.02933	1.00239	0.975874	1.03666	0.831302	0.880166	0.87479	1.05407	1.05565	1.04203	0.992902	0.953808	1.00363	1.20283	1.22858	1.21574	1.2082	1.29128	1.21796	1.09444	1.19977	1.15999	0.844169	0.838788	0.845925
BAHD1	54	0.992667	0.964116	0.907932	0.903587	0.975019	1.15436	0.951532	0.968169	0.899179	1.08443	1.095	1.04912	1.09178	0.904719	1.08858	0.962312	0.964573	1.04263	0.928728	0.918926	0.904201	0.940251	1.01346	0.962153	0.933442	0.932821	0.899695	0.782947	0.813903	0.858108	1.07797	1.0345	0.916245	1.11239	1.1871	1.15994	1.01854	0.923641	1.06548	1.03338	1.08262	0.940789	0.836024	0.882522	0.839583	1.08259	1.15156	1.20341
BAIAP2	54	1.09722	1.09218	1.07471	0.414189	0.474223	0.392449	1.07617	1.08381	1.07155	0.974937	0.964095	0.972668	1.00726	0.98787	1.0184	1.77611	1.7512	1.73676	0.644988	0.719946	0.626902	1.34627	1.40038	1.40417	0.882858	0.914128	0.87769	1.25806	1.32833	1.28121	0.74239	0.766387	0.742556	0.872738	0.882247	0.868543	0.682945	0.719742	0.689318	0.785913	0.768046	0.782226	1.32455	1.32761	1.30114	0.913082	0.91284	0.90874
BAIAP2L1	54	1.56298	1.60244	1.50884	0.682204	0.615599	0.699051	0.659119	0.601723	0.627742	0.827234	0.836948	0.824352	1.37081	1.38151	1.34792	0.963021	0.956295	0.931924	1.67086	1.60466	1.67329	1.09629	1.03846	1.05003	1.37731	1.40717	1.40185	0.83432	0.820759	0.823092	1.57771	1.5608	1.61621	0.675352	0.647845	0.691266	0.667418	0.631228	0.694145	0.680071	0.643327	0.639068	0.928623	0.942774	0.954866	1.34822	1.39483	1.3003
BAIAP2L2	27				4.34888	4.07093	2.55892							0.81278	0.677051	1.72968				3.57772	3.54504	2.30046	1.17694	1.07111	1.25275	0.425977	0.345313	0.575748				1.18128	0.591192	0.931587	0.353489	0.36854	0.723779	0.353886	0.246879	0.514674							1.85947	1.64969	1.08329
BAK1	54	0.939591	0.846231	0.800535	0.904446	0.770673	0.956683	0.677523	0.708074	0.721634	1.05293	0.976198	1.00333	1.25746	1.19054	1.22166	1.43936	1.29573	1.53684	0.610485	0.778929	0.780546	0.996122	1.06442	0.84758	1.00204	1.0934	0.929818	0.851045	0.866547	0.915396	0.853986	0.854285	0.856782	1.0079	1.04787	0.98366	0.884588	0.797743	0.849802	0.948557	0.854507	0.872955	1.18322	1.41887	1.39131	1.26661	1.45885	1.28518
BAMBI	54	0.79272	0.56557	0.763851	1.63892	1.85024	1.77768	1.03379	0.931579	0.930127	0.803901	0.848656	0.703583	1.1045	0.852027	0.848725	2.69329	1.84971	3.05221	1.06178	1.09169	1.01125	0.715427	0.7186	0.827019	0.805551	0.797947	0.783112	0.673099	0.534811	0.786446	0.622042	0.492296	0.584355	1.07043	0.989836	0.980989	0.672006	0.680633	0.989051	0.967642	1.00863	1.24149	0.618123	0.493805	0.781368	0.470141	0.570016	0.688146
BANF1	54	0.804367	0.792964	0.78304	1.02484	1.02251	0.9702	1.02253	1.02745	1.00377	0.965586	0.955509	0.963484	1.45439	1.32307	1.34029	1.03179	0.997425	1.00015	1.08471	1.04891	1.04522	1.06166	1.08216	1.06452	0.89567	0.903767	0.902327	1.06419	1.03966	1.01367	1.06157	1.04596	1.08597	1.23285	1.19306	1.23647	1.38929	1.30279	1.40369	1.29501	1.31888	1.25528	0.890437	0.880854	0.849032	0.941147	0.933766	0.888429
BANP	54	1.00407	1.06879	0.974283	0.885598	0.868447	0.901803	1.04673	1.12502	1.09568	0.888829	0.947077	0.931321	1.0838	1.08399	1.15503	0.778081	0.777348	0.855644	0.945903	1.03333	0.96191	0.93041	1.00045	1.03112	0.99221	0.902451	0.973262	0.945725	0.945922	0.965155	1.24329	1.19479	1.13033	1.07535	1.07014	1.05199	1.1761	1.18599	1.12711	1.24501	1.32167	1.13155	0.770784	0.829696	0.740461	0.79679	0.742569	0.755318
BAP1	54	1.02623	0.885332	0.893996	1.18215	0.983718	1.14834	1.0809	1.18089	1.09409	1.26781	1.28754	1.26947	0.470669	0.426354	0.38464	0.936966	0.963329	0.934515	1.61213	1.54198	1.6314	1.09986	1.07445	1.17073	1.16603	0.963999	1.12981	0.961296	0.892577	0.84637	1.00687	0.960526	1.00337	0.991319	0.869778	0.966887	1.08759	1.02372	1.05815	1.00344	0.955023	0.933233	0.953387	0.91121	0.826952	0.842134	0.738464	0.788093
BARD1	54	0.91286	0.892546	0.941507	1.04582	0.907227	0.90529	1.46091	1.66846	1.56564	1.09152	1.1791	1.09554	0.900769	0.850186	0.919225	0.697673	0.5765	0.543045	1.11149	1.18072	1.09758	0.716455	0.665203	0.807921	1.03542	1.03956	1.03205	0.866953	0.883364	0.880018	1.33208	1.26078	1.33275	1.21371	1.28114	1.29782	1.08497	1.16973	1.0852	1.18229	1.10682	1.16803	1.00653	0.955168	0.958628	0.832958	0.789663	0.892874
BARX2	27				0.777524	1.15332	0.802795							4.64219	4.91409	4.82332				0.453028	0.586777	0.548073	0.808441	0.954665	1.07834	0.305348	0.579835	0.505562				0.894361	1.01276	1.1985	0.497212	0.575166	0.722766	0.494019	0.742642	0.794272							0.653168	0.798039	0.937263
BASP1	54	0.305105	0.328235	0.389521	2.98279	3.0395	3.31922	0.35225	0.373662	0.372613	2.02076	2.13368	1.9113	0.470957	0.541439	0.510453	0.560613	0.520954	0.560436	0.26069	0.363021	0.291049	0.80418	0.864448	0.834131	0.290874	0.408158	0.319137	1.39763	1.41105	1.38888	0.279656	0.376603	0.295222	1.57568	1.49314	1.63507	1.17678	1.20798	1.22602	1.26286	1.27976	1.27035	3.35648	3.32784	3.20555	0.197644	0.276889	0.222972
BATF	9					0.55813									0.66867						0.85897			0.676809			0.950193						1.6111			1.62176			0.973047									2.12571
BAX	54	1.06678	1.12578	1.05303	0.926721	0.910286	0.890227	1.26343	1.37426	1.36271	1.08914	1.16285	1.17992	1.1596	1.25866	1.15908	0.682139	0.704209	0.713123	0.919241	0.926037	0.860054	0.953488	0.88882	0.946558	1.07773	1.23417	1.1925	0.934803	0.974629	1.0031	1.27877	1.37467	1.41059	1.07701	1.20846	1.13679	1.25449	1.27611	1.3046	1.28413	1.26437	1.33097	0.788338	0.852397	0.772374	0.793584	0.760458	0.763007
BAZ1A	54	0.982286	0.910475	0.924081	1.24689	1.13898	1.11463	1.00922	1.02297	1.00095	0.884466	0.883668	0.848092	1.02071	1.01517	0.981628	0.737448	0.706653	0.714584	1.00438	0.936216	0.996678	1.07996	1.013	1.03623	1.32846	1.35672	1.2577	1.06621	1.05133	1.03458	1.02769	1.02178	0.995089	1.56832	1.55811	1.60723	1.28991	1.33273	1.27827	1.42189	1.42811	1.40543	0.735224	0.687964	0.713003	0.957791	0.934517	0.968228
BAZ1B	54	0.798559	0.791901	0.776772	1.21166	1.08331	1.05563	1.27913	1.27754	1.30637	0.822232	0.806332	0.805537	1.51468	1.52751	1.4788	0.629722	0.586025	0.647316	1.34432	1.3323	1.39835	0.873295	0.847077	0.848205	1.0512	1.09972	1.08312	0.749342	0.716697	0.726429	1.12215	1.12547	1.14366	1.03907	1.06182	1.03342	0.983862	1.01769	1.02125	1.1365	1.14962	1.13253	0.814283	0.807849	0.808984	1.21985	1.20116	1.23971
BAZ2A	54	0.982187	1.05377	0.979244	1.0162	0.917981	0.914301	0.957213	1.033	1.00154	1.4626	1.47218	1.46167	0.86114	0.886999	0.872583	1.23205	1.26747	1.26199	1.46271	1.41352	1.45818	0.88851	0.896071	0.879196	0.747993	0.779487	0.733109	1.09361	1.07882	1.08541	0.848345	0.925591	0.877758	0.88514	0.916829	0.872175	0.859668	0.916596	0.859715	0.927776	0.953343	0.959283	0.884041	0.914695	0.951243	1.17226	1.18185	1.21498
BAZ2B	54	0.859231	0.814007	0.81589	0.926661	0.905654	0.930225	0.923714	0.946749	0.9456	0.94004	0.876705	1.02759	1.07553	0.945681	1.003	0.922815	0.858603	0.881927	1.18581	1.17633	1.19502	1.11524	0.992254	1.02922	0.818077	0.754823	0.787229	1.05257	1.05502	1.0812	1.25456	1.30751	1.32949	1.34012	1.34843	1.36734	1.4365	1.4013	1.41564	1.51393	1.41999	1.44316	0.896147	0.680498	0.843386	0.610396	0.651793	0.676206
BBC3	54	1.18031	1.03024	0.769614	0.819456	1.19807	1.12727	1.44785	1.1799	3.82593	1.12288	1.05194	1.25446	0.681144	0.690005	0.705922	2.02453	1.45205	2.28079	0.606764	0.7259	0.761858	0.844781	1.01886	0.965944	0.722241	0.669764	0.551754	0.665579	0.964663	0.981582	0.71689	0.978783	0.705232	1.20375	0.700801	1.28837	0.835522	1.17103	0.996702	1.14976	0.981342	2.34204	0.864386	0.739404	0.839582	1.25477	0.863937	1.03519
BBOX1	36		0.632614		0.760438	0.790673	0.557639		0.343111			0.580538		2.40718	4.0032	3.26528		0.561145		0.629798	0.804492	0.65697	0.90516	0.575335	0.648645	0.462851	0.549516	0.444059		0.340031		1.88972	2.91393	2.804	0.338222	0.306124	0.485903	0.367755	0.338492	0.325701		0.317041			0.466054		0.506233	0.585874	0.544188
BBS10	18			1.25877	1.04334					1.12593			0.970758	0.863176					1.08778	0.922353			1.00435			1.45723					1.28755	0.84289			1.33183			1.16778					1.16672			1.27819	1.73421
BBS2	54	0.489542	0.522781	0.790733	1.07858	0.883363	1.00729	0.820262	0.7948	0.849983	1.10933	1.04602	1.06467	0.822872	0.872486	0.86804	1.31474	1.06948	1.16	1.13907	1.11627	1.31456	0.915983	0.808063	1.01554	0.730028	0.912043	0.691285	1.15009	1.13191	1.16752	0.827432	0.788755	0.848156	0.978124	0.805693	0.993774	0.910081	0.812074	0.95071	0.724505	0.879378	0.740556	1.79682	1.51983	1.39497	0.807861	0.624384	0.827948
BBS4	54	0.694881	0.626141	0.663782	0.976759	0.917412	0.974134	1.93406	1.71634	1.77139	0.899531	0.805634	0.870226	0.622735	0.573956	0.720112	1.17672	1.1652	1.12697	1.13327	0.996679	1.27259	0.690164	0.778853	0.877925	0.593448	0.651416	0.774244	0.96692	1.04681	1.05525	0.616207	0.667786	0.828111	1.04646	0.99276	1.09585	0.878503	0.782984	0.890095	0.936281	1.00639	0.956864	1.06416	1.41657	1.17334	0.930026	0.937992	1.05051
BBS7	54	0.78109	0.679112	0.859012	1.05208	1.25447	1.7081	1.2352	1.27865	1.15788	1.09052	1.24661	1.06401	0.881709	0.813727	0.673683	1.16897	1.23244	1.2426	1.13552	1.16536	1.35325	0.871134	0.779129	1.04174	0.777598	0.492445	0.879315	1.30826	1.51341	1.35189	0.62577	0.52091	0.621812	1.02487	1.04791	1.12342	0.841396	0.521033	0.630679	0.686885	0.320184	0.625879	2.0382	2.40987	1.72057	0.754047	0.620956	0.807263
BBS9	54	0.665952	0.877693	0.696409	0.839894	1.07632	1.22934	0.848814	0.968703	0.982276	1.06646	1.12133	1.03556	0.671396	0.765938	1.24661	1.07875	1.09651	1.10984	1.00828	1.03336	1.14254	0.666809	0.791843	1.0749	0.640818	0.545549	0.926423	1.04282	0.952646	1.0387	0.729834	0.714675	0.938504	1.18873	1.09367	1.23471	0.990707	0.890615	1.01037	1.06365	1.02939	0.972011	1.71267	1.43707	1.4284	0.784969	0.678453	1.03971
BBX	54	1.05454	1.07405	1.06759	1.13056	1.0798	1.06163	1.06727	1.08324	1.05166	1.0461	1.01978	1.10828	1.09188	1.01196	1.04846	0.589588	0.58871	0.616091	1.48797	1.5703	1.59921	1.18283	1.12936	1.12926	0.955095	0.924082	0.922269	0.848396	0.888516	0.848291	1.27718	1.21443	1.32707	1.04713	1.10366	1.07053	1.10549	1.08196	1.04622	1.02757	0.998083	1.01618	0.811487	0.80415	0.790436	0.696435	0.733027	0.634442
BCAM	54	0.879445	0.773765	0.849975	0.452346	0.433693	0.488108	1.47609	1.55645	1.51033	0.818094	0.726556	0.889613	0.828124	0.824643	0.82529	2.1884	2.16821	1.98207	0.545915	0.595306	0.577836	0.866737	0.845591	0.854214	0.54901	0.563434	0.571527	1.22993	1.24434	1.23807	0.571928	0.535215	0.560453	0.873453	0.9126	0.86151	0.764559	0.772544	0.770325	0.906461	0.878758	0.945558	0.711302	0.647355	0.713237	2.19949	2.21095	2.21931
BCAP29	54	0.963671	1.00015	1.04696	1.44258	1.3288	1.26405	0.907576	0.918024	0.945403	1.03365	1.00977	1.02052	0.584719	0.627496	0.6241	0.867055	0.896258	0.898397	1.28516	1.18338	1.24002	0.766746	0.816002	0.739378	0.985438	0.961202	0.955397	1.03308	1.03092	1.01551	1.19963	1.20261	1.1967	0.965764	1.04809	1.0621	1.15356	1.16684	1.16479	1.35998	1.34164	1.4156	1.59917	1.59219	1.55831	1.05902	1.08489	1.12322
BCAP31	54	0.964696	0.955723	0.96482	1.41452	1.29911	1.3213	0.782888	0.762724	0.762255	0.847643	0.850608	0.872328	1.00526	1.00832	0.975981	1.39404	1.36064	1.29891	1.16257	1.08006	1.11171	0.758339	0.750374	0.742466	1.02513	1.00869	1.00827	0.968405	0.956433	0.971988	1.1256	1.12298	1.11843	1.00753	1.00907	1.0105	1.25852	1.22889	1.22998	1.37796	1.35934	1.32009	1.12428	1.12661	1.12868	0.848029	0.837449	0.85116
BCAR1	54	1.74964	1.90216	1.79199	1.52119	1.70625	1.54329	1.12693	1.15665	1.18581	0.851269	0.79054	0.843025	0.698	0.755408	0.727472	1.01053	0.975103	0.999431	0.662627	0.655962	0.686026	1.30623	1.2621	1.26109	1.48845	1.50741	1.46095	1.15809	1.14767	1.22537	1.15091	1.09567	1.07629	0.807977	0.845144	0.818933	0.747368	0.78152	0.770524	0.89053	0.896566	0.888126	1.19427	1.27425	1.32904	0.70878	0.736459	0.725478
BCAR3	54	1.05896	1.02473	1.05457	1.96468	2.21218	2.16881	0.901485	0.85031	0.917012	0.929251	0.905703	0.903501	0.736709	0.739228	0.710607	1.07718	1.04249	1.10423	0.658346	0.685363	0.631655	1.59328	1.64098	1.60783	1.20314	1.21516	1.22705	1.52663	1.58314	1.55271	1.15273	1.12886	1.17566	0.648212	0.623709	0.622464	0.650469	0.620589	0.598677	0.610686	0.49963	0.681019	1.23121	1.18754	1.21186	0.761097	0.748866	0.782735
BCAS1	54	0.472095	0.281985	0.38314	0.445629	0.431858	0.384968	0.369551	0.233637	0.279247	0.468896	0.276069	0.324471	0.438043	0.389697	0.363791	5.36463	6.34515	5.7193	0.451821	0.422841	0.370551	0.445709	0.431244	0.392257	0.512607	0.497951	0.452969	0.516567	0.309513	0.430244	0.452048	0.408421	0.386024	1.80425	1.81202	1.92273	0.692538	0.682124	0.677693	0.558463	0.433202	0.479949	0.341776	0.250597	0.280742	4.36281	4.33788	4.72897
BCAS2	54	1.07562	1.0012	0.996967	1.06463	0.968287	0.929275	1.0334	1.03837	0.981698	0.961323	0.959076	1.02268	0.977622	0.983995	0.998789	0.875752	0.832245	0.859609	1.07178	1.11426	1.11433	1.28306	1.22041	1.25775	1.01434	0.993562	0.994331	1.14598	1.13001	1.13067	0.926807	0.981124	0.959256	1.10767	1.07012	1.04527	1.21077	1.21887	1.16986	1.16052	1.25599	1.22556	0.89728	0.886159	0.923038	0.812263	0.864229	0.818215
BCAS3	54	0.460414	0.414817	0.466365	0.658361	0.756394	0.624772	0.699821	0.685252	0.604848	1.13228	1.02597	1.06028	0.89818	0.963627	0.925192	1.35614	1.25809	1.3002	0.7389	0.746291	0.691749	0.824406	0.805933	0.777175	0.68149	0.826686	0.690523	0.878208	0.889843	0.799826	0.814205	0.861783	0.83632	1.22263	1.3293	1.17843	1.85619	1.9081	2.01651	1.5322	1.68451	1.53353	1.22215	1.53466	1.37609	0.634444	0.637576	0.646732
BCAS4	54	0.955337	1.05138	1.08472	0.886048	0.773342	0.872064	1.20849	1.13813	1.27018	1.02087	1.08116	1.00061	0.690836	0.691742	0.745395	1.64398	1.97343	2.21508	0.565189	0.662356	0.744561	1.0446	0.897854	0.839267	1.03663	0.76104	0.818839	1.08815	0.930822	1.02635	0.677364	0.733033	0.807885	0.772095	0.563003	0.695199	0.961737	0.941534	1.0237	1.1202	0.879168	1.01962	1.04949	1.24163	1.22615	1.10295	0.977832	1.01993
BCAT1	54	0.545272	0.569273	0.729326	0.759299	0.854552	0.747677	5.4118	4.23986	3.9923	0.924047	0.862127	1.00136	0.81909	0.81166	0.840991	0.598254	0.569527	0.590569	0.758902	0.793447	0.676459	0.735621	0.825777	0.800387	0.298792	0.144044	0.186657	0.630865	0.62096	0.694201	0.266168	0.14744	0.181191	0.263249	0.0955073	0.181693	0.294892	0.107963	0.195127	0.567395	0.502336	0.620873	0.968421	0.879116	0.878135	0.313373	0.14457	0.208374
BCAT2	54	1.01014	1.03033	1.02404	0.760877	0.730581	0.690339	0.811164	0.803155	0.867436	1.08063	1.11702	1.11012	0.972474	0.970992	1.02657	1.47101	1.51004	1.38188	0.665281	0.695112	0.633932	0.808836	0.858655	0.796196	0.88865	0.910903	0.901082	0.961163	0.954092	0.955111	1.22141	1.17806	1.2016	1.38337	1.36566	1.35556	1.41961	1.44192	1.42108	1.40084	1.46998	1.33223	0.665135	0.584408	0.708857	1.48991	1.45957	1.51768
BCCIP	54	0.719	0.729581	0.734665	0.772663	0.68854	0.727755	1.04611	1.02845	1.03451	0.868559	0.825737	0.851704	0.983577	0.900125	1.02168	0.890046	0.857021	0.869546	0.991014	0.991072	1.02597	1.51782	1.56647	1.68031	1.09317	1.07029	1.04172	2.01654	2.36002	2.17815	0.738468	0.732332	0.759065	1.0289	0.972464	1.00799	0.794846	0.763868	0.796192	0.794696	0.766862	0.783431	0.802586	0.770281	0.835381	1.21874	1.21715	1.29955
BCDIN3D	45	1.04278	0.91912	1.21622	0.810558	0.89933		0.945557	1.25882	1.30668	1.10952	1.04561	1.31253	0.763939	0.848716		1.07479	1.48685	1.21988	0.681913	0.723843		0.714189	0.842099		0.817176	0.817794		0.866154	0.894195	0.997581	0.628149	0.846555		1.14514	1.40003		1.01817	1.16558		0.990768	0.974456	1.25127	0.963491	1.06472	1.22984	1.27195	1.56534
BCHE	9		0.544567						0.46695			0.747757						1.16772												3.15296												0.410856			1.65596
BCKDHB	54	0.954797	0.961922	0.968606	0.982585	0.884049	0.912421	0.929653	0.956709	0.921266	0.976755	1.06325	1.03517	0.694313	0.703224	0.766788	2.71548	2.81758	2.76931	0.848274	0.838413	0.836426	1.15096	1.23686	1.23464	0.867006	0.857619	0.843342	0.666395	0.584039	0.631166	0.789741	0.821159	0.771561	0.96943	0.944004	0.936924	1.01654	1.01996	1.01222	0.966929	1.0065	0.95328	1.10147	1.06279	1.08881	1.33264	1.38171	1.2688
BCKDK	54	0.70637	0.675073	0.699472	1.63904	1.45949	1.52146	0.733246	0.781415	0.749571	0.890523	0.94526	0.937522	0.771078	0.711235	0.812591	1.99898	2.10099	1.8795	0.943711	0.973338	0.962298	1.51982	1.35417	1.33907	0.777384	0.737657	0.759892	1.02152	1.10073	1.03218	1.06835	1.0371	1.06519	1.09376	1.0425	1.10785	0.997812	0.992325	0.97883	1.01793	1.0317	1.03496	0.931681	1.01166	0.918711	1.26994	1.20897	1.17559
BCL10	54	0.788631	0.757885	0.825657	2.24295	2.29149	2.56405	0.741721	0.728091	0.683669	0.9621	0.990293	0.948046	0.820734	0.868677	0.706648	0.785452	0.789689	0.72556	0.715022	0.733159	0.638456	0.923869	0.897176	0.900372	0.982412	1.05161	0.975544	2.13581	2.16298	2.39541	1.15319	1.17429	1.15571	0.965015	0.940498	0.955125	0.959979	0.930703	0.929826	0.794538	0.811848	0.794252	1.07695	1.12767	1.17145	1.0979	1.02749	1.00246
BCL11A	36			0.909301	0.813279	0.787513	0.67579			0.825411			1.00668	2.90539	3.5043	4.80241			0.931238	1.36963	1.80925	1.87415	0.834566	0.996747	0.588107	0.658897	0.635055	0.519305			0.964313	0.649856	0.771372	0.565082	0.513773	0.547359	0.463783	0.523492	0.716196	0.365746			0.654261			0.834272	0.652722	0.728826	0.670861
BCL11B	54	1.18292	1.07049	0.870629	0.60589	0.645468	0.408884	0.388526	0.529999	0.784796	2.43769	2.50747	2.20714	0.806289	0.786543	0.460717	0.635758	0.532586	0.635026	0.537142	0.677927	0.503219	0.864705	0.821475	0.811634	1.17282	1.10276	1.13377	0.605537	0.58048	0.728019	1.35158	1.34986	1.43704	2.39971	2.60292	4.1821	0.879978	1.02465	0.699812	1.06133	0.907422	1.24012	0.633369	0.532968	0.619669	0.668444	0.737834	0.510126
BCL2	52	0.351904	0.276099	0.232124	1.44954	1.58728	1.49779	1.89768	1.96444	1.96099	0.38033	0.367888	0.284414	0.80443	0.758872	0.716234	1.42841	1.32192	1.27954	0.484925	0.347382	0.388901	0.205189	0.209521	0.222088	0.482256	0.436955	0.232602	0.330439	0.250795	0.207784	0.286386	0.338929	0.354631	3.01184	2.93704	2.80148	0.157439	NA	NA	2.76243	2.93409	2.81603	0.731848	0.617743	0.539627	0.298741	0.196499	0.250672
BCL2L1	54	0.93381	0.938779	0.917793	0.989168	0.836264	0.863105	1.07391	1.16663	1.07116	1.1156	1.09309	1.1602	0.652253	0.620129	0.691647	1.37089	1.4313	1.45622	0.629882	0.627855	0.557373	1.77271	1.69274	1.63381	0.886661	0.779815	0.846867	1.2435	1.30959	1.16932	0.718311	0.669318	0.560861	1.16005	0.991852	1.141	0.75368	0.752598	0.791431	0.784015	0.740979	0.698254	0.750588	0.835836	0.809416	0.87825	0.836783	0.875849
BCL2L11	45	0.795925	0.804333	1.03094	0.850088	0.747599		0.876755	0.910019	0.905616	1.23565	1.22271	1.17108	0.890926	0.953498		0.979895	0.848548	0.969156	1.03425	1.26506		0.969174	1.1464		0.887788	0.845656		1.0077	1.05282	1.20106	1.25713	1.31813		0.896376	0.953517		1.34799	1.36011		2.19101	2.03431	1.86841	0.7046	0.885311	0.805945	0.840342	0.908832
BCL2L12	54	1.9063	1.59664	1.77694	1.12177	1.18963	1.143	1.03199	1.07404	1.00371	1.43589	1.44822	1.33276	1.11408	1.18484	1.13333	0.564771	0.67185	0.597175	0.636193	0.588823	0.663999	1.21747	1.2239	1.06245	1.65677	1.74113	1.57927	1.15948	1.07576	1.14566	0.602513	0.630494	0.67478	0.726377	0.712686	0.827074	1.07598	1.21312	1.06795	1.15909	1.11514	1.03009	0.832356	0.904249	0.823061	0.918842	0.935388	0.81866
BCL2L13	54	0.98809	0.973724	0.888704	1.12459	1.08705	1.04709	0.744761	0.755364	0.736774	1.33469	1.50563	1.26798	0.941414	0.891506	0.897357	1.04385	1.04161	1.01646	1.14999	1.192	1.13829	1.17127	1.1645	1.16948	0.91748	0.886432	0.982449	2.21628	2.25597	2.35371	1.20483	1.18867	1.19182	0.806181	0.795814	0.853281	0.699471	0.604028	0.701234	0.69217	0.736294	0.690886	0.862273	0.915039	0.87717	0.805747	0.731062	0.828441
BCL2L14	18					0.829529	1.27311								4.56852	1.13754					0.620761	1.36577		1.08405	0.893802		0.575725	0.819687					3.8316	0.977095		0.535886	1.18858		0.621318	1.19594								0.495185	1.12927
BCL2L15	27				0.675668	0.742675	0.652092							0.460569	0.681369	0.814371				0.705684	0.596587	0.790323	1.10628	1.09388	0.891358	0.683939	0.762081	0.67182				7.2186	6.11675	3.89123	0.549394	0.623491	0.556411	0.54465	0.571192	0.658863							0.619372	0.592399	0.67706
BCL3	54	0.758326	0.824874	0.743162	0.997361	1.03448	1.13205	0.802467	0.830896	0.918006	1.09119	0.958168	1.10226	0.988842	0.982732	1.04495	1.32592	1.32885	1.30161	0.925431	0.870765	0.976613	0.795236	0.911445	0.926412	1.04092	1.12462	1.08038	0.832057	0.967328	0.937673	1.19071	1.1557	1.09842	0.989643	0.930766	1.06585	0.85886	0.822244	0.967523	0.821518	0.801685	0.86789	0.737277	0.810553	0.929997	1.03074	1.10076	1.10133
BCL6	54	1.22752	1.23839	0.908446	1.30495	1.03136	1.32628	0.483042	0.47525	0.538113	0.904152	0.809962	0.834501	1.05924	0.807503	0.759622	1.06043	0.961686	0.881503	1.54784	1.93925	2.00165	1.22768	1.14733	1.32147	0.962229	0.969796	1.05817	0.600073	0.632864	0.620813	1.43999	2.2086	2.15882	0.955121	0.912166	0.95899	0.995384	0.764639	0.790427	0.738412	0.701067	0.776261	0.722895	0.604576	0.725041	1.1025	0.930328	0.958322
BCL7A	54	0.915805	0.819597	1.02939	0.822732	1.18082	1.03378	1.33888	1.3661	1.28485	0.972659	0.932796	1.02614	2.15178	1.57673	1.62585	1.06564	0.919282	1.08666	0.744269	0.974119	0.874651	1.03384	1.10584	1.00969	1.06163	1.24232	0.81705	0.760213	0.76267	1.07605	0.963104	1.16316	0.963587	1.19951	1.32234	1.23552	1.26689	1.47374	1.27965	1.28649	1.25222	1.189	0.987024	0.776303	0.961771	0.691393	0.900496	0.698236
BCL7B	54	1.26705	1.13264	1.16147	0.95267	0.931814	1.23584	1.11759	1.06135	1.06014	1.16733	0.993375	0.851712	1.09081	1.14078	1.1636	0.96404	0.801685	0.820583	1.22373	1.2939	1.24537	0.951529	0.937479	0.884049	1.21385	1.07617	0.914291	1.30179	0.919956	1.06887	1.08852	1.08324	0.877578	1.21412	0.965677	1.06346	1.21483	1.20759	1.05008	1.35675	1.23919	1.34581	0.93095	0.963635	0.78079	1.29412	0.999286	1.0881
BCL7C	54	0.809668	0.788196	0.866875	1.20943	0.855593	0.956052	0.823607	0.675744	0.810662	1.04661	1.08845	1.04692	0.765895	0.705779	0.772256	1.09038	1.15622	1.07527	1.35634	1.17465	1.25211	1.17472	1.03176	1.05897	1.10956	1.1162	1.0633	0.866001	0.826846	0.818146	1.43464	1.48594	1.64298	1.00856	0.990223	0.993309	1.08584	1.17035	1.11217	1.12115	1.03307	1.05997	0.961263	0.919543	1.02256	0.94266	0.93894	0.862016
BCL9	54	0.65186	0.666888	0.726026	0.658844	0.783921	0.781487	2.74057	2.99327	2.4805	1.36176	1.32808	1.29513	1.62518	1.46722	1.40849	1.0433	0.889185	0.915982	1.00811	1.06729	0.942821	0.556399	0.665137	0.528273	0.798026	0.908479	0.823991	0.822257	0.857826	0.858584	0.753635	0.80368	0.805364	0.824032	0.936927	0.883875	0.835459	0.871342	0.878165	0.923717	0.948573	0.94239	0.637387	0.66837	0.697273	0.723318	0.827163	0.807555
BCL9L	54	1.31443	1.27311	1.26503	0.826667	0.821249	0.840278	0.831503	0.853314	0.856688	0.993331	0.96428	0.918946	1.05894	1.04244	1.09636	0.721542	0.730751	0.742317	1.03762	1.07598	1.1083	1.02509	1.07534	1.07264	0.946556	0.975956	1.01068	1.08592	1.04645	1.07824	0.890537	0.941343	1.01659	1.06161	1.17236	1.18583	1.23628	1.32702	1.39389	1.36506	1.47155	1.35901	0.778058	0.806399	0.738651	0.976068	1.02033	1.08783
BCLAF1	54	1.04597	1.00358	1.02928	1.25737	1.16469	1.16322	1.05706	1.11938	1.12361	1.01613	1.04401	1.05305	1.09665	1.06849	1.08265	0.939223	0.957001	0.920819	0.997358	0.988096	1.0234	1.14146	1.08689	1.07717	1.10344	1.11999	1.14729	1.10352	1.11453	1.13099	0.925997	0.913808	0.918246	1.10881	1.10794	1.15279	1.16936	1.14868	1.20778	1.18495	1.19537	1.18623	0.965775	0.976501	0.987576	1.04402	1.04905	1.07502
BCO2	9					0.817385									0.511098						0.447797			1.38798			0.354664						0.858387			0.451011			0.482719									0.831394
BCOR	54	0.798187	0.719262	0.805837	0.941294	0.947297	1.01364	1.0242	1.02156	1.04773	0.926406	0.883737	0.952297	1.06438	1.0592	1.04809	1.00067	0.874023	0.920604	1.28249	1.24245	1.29365	0.831361	0.885892	0.78665	0.853864	0.841458	0.86779	0.702603	0.650361	0.70579	0.803748	0.796447	0.830626	1.37588	1.52712	1.48838	0.909518	0.957558	0.978505	0.966732	0.95284	0.953888	1.02991	1.07542	1.10948	1.6	1.62687	1.67636
BCORL1	54	1.13161	1.08356	0.995573	1.6476	1.40314	1.61132	0.645824	0.578675	0.64555	1.52716	1.63742	1.31817	1.00608	1.02983	1.02836	0.682808	0.50443	0.603836	1.02667	0.930376	1.02853	0.763749	0.744518	0.78749	1.08394	0.993405	1.08684	0.942312	0.959519	0.85508	0.498433	0.626615	0.423531	1.889	1.62455	2.08505	0.959148	0.937413	0.900392	0.892869	0.89974	0.882206	1.24435	1.26115	1.11464	0.641661	0.576481	0.559132
BCR	54	1.17736	1.14454	1.18002	0.845764	0.815213	0.833084	1.04943	1.00299	1.11517	1.29989	1.2735	1.31363	1.07287	1.07732	1.05681	0.850488	0.855779	0.816368	1.1568	1.09416	1.20949	1.15674	1.14415	1.20073	1.57598	1.45454	1.58183	0.909006	0.893052	0.897753	1.26038	1.20341	1.25677	1.04224	1.01095	1.05513	0.886611	0.861691	0.886374	0.820182	0.824768	0.878128	0.853871	0.882446	0.823769	0.746583	0.736826	0.754685
BCS1L	54	0.820623	0.81167	0.881732	1.04174	0.959228	1.00254	0.996315	0.831261	0.904329	0.792493	0.62849	0.742961	0.991218	0.961731	0.974598	1.03154	1.14604	1.03897	1.20444	1.13177	1.28766	0.685852	0.650875	0.663646	0.855051	0.881103	0.840978	1.03197	1.17682	1.14537	1.1021	1.0811	1.22351	1.1046	1.02085	1.10948	1.01092	0.959928	0.982037	0.937408	0.895139	0.958013	0.972144	0.85206	0.913701	1.43851	1.33542	1.54758
BDH1	54	0.671645	0.65886	0.747082	0.711355	0.667909	0.672807	0.776455	0.863596	0.823527	0.528885	0.519641	0.551198	0.607075	0.470767	0.630497	1.56118	1.59106	1.61372	0.666061	0.716896	0.609476	1.85015	1.83653	2.06665	0.70802	0.622399	0.604544	0.599762	0.617903	0.635192	0.914072	0.868287	0.95793	2.02865	2.02146	1.95034	1.18491	1.16585	1.20394	1.44835	1.42282	1.38361	1.10356	1.12331	1.10524	0.495119	0.467996	0.375586
BDH2	54	0.295603	0.36075	0.361872	0.721867	0.469321	0.725801	1.53156	1.53613	1.46089	0.54175	0.611069	0.624136	1.04103	0.980419	1.1465	0.445419	0.424346	0.40426	2.80433	3.06764	3.77939	0.849014	0.694891	0.758772	0.756621	0.496105	0.679536	0.768665	0.749333	0.726635	1.61695	1.61413	1.90493	1.13793	1.16566	1.50777	0.540058	0.502921	0.522353	0.359365	0.326368	0.529532	1.03245	0.920283	1.01814	0.754517	0.564811	0.765536
BDP1	54	1.05947	1.20405	1.13394	1.17578	1.06257	1.03929	1.03251	1.22847	1.18182	0.813175	0.807087	0.920213	0.865047	0.844264	0.954353	1.06228	1.13478	1.13394	1.37188	1.41429	1.22668	0.985942	1.00338	1.01308	1.06318	1.09582	0.995015	0.821532	0.716151	0.703585	0.896294	0.931586	0.92259	1.20838	1.24296	1.2566	1.25016	1.31567	1.28365	1.3076	1.49409	1.2712	0.908884	1.07265	0.866134	0.942144	1.0588	1.14884
BECN1	54	0.898774	0.93285	0.907361	0.987926	1.02589	1.01505	0.734243	0.752931	0.731181	0.960181	1.02179	0.972097	0.9757	0.980002	0.952774	1.06915	0.993367	1.03208	1.14275	1.04055	1.07251	0.891268	0.786914	0.780632	1.09789	1.17944	1.08772	1.34205	1.35774	1.42643	1.07565	0.985771	1.0435	1.083	1.04498	1.11017	0.911367	0.882262	0.936186	0.84397	0.888181	0.893112	0.834073	0.92899	0.820745	0.965007	0.919895	0.938662
BEND3	54	1.08609	1.13213	1.05298	0.792478	0.788275	0.738625	1.39338	1.34174	1.42948	1.04626	1.06237	1.02157	1.17585	1.11845	1.10959	0.74083	0.694495	0.673341	1.27878	1.23418	1.23854	1.04734	1.05205	0.973714	1.08022	1.07312	1.10806	0.934289	0.907385	0.962366	0.982805	0.949817	0.909759	1.24474	1.20753	1.2468	1.10659	1.16756	1.06742	1.17713	1.15641	1.18957	0.756699	0.770185	0.680642	0.835625	0.898055	0.930671
BEND7	27				0.392216	1.12829	1.00055							4.48728	2.7117	2.30263				0.5915	0.957765	0.731325	0.718042	0.975177	0.948484	0.884914	1.25062	0.96626				0.395309	1.04256	0.804556	0.38752	1.00863	0.575072	0.966546	1.23558	0.860379							0.378396	1.04406	0.58985
BET1	54	0.788836	0.912654	0.914975	0.993767	1.06119	1.09224	0.994957	1.05294	1.1502	0.771917	0.846795	0.822145	1.22334	1.294	1.22955	1.08847	1.06964	1.13969	1.10311	1.04143	1.1048	0.683578	0.853403	0.618481	0.947578	0.902769	0.893935	0.7818	0.827357	0.72656	1.03825	1.03666	0.949985	0.776353	0.791528	0.766319	0.831117	0.815537	0.555245	0.831651	0.816688	0.767582	1.12573	1.19879	1.07116	1.18	1.19667	0.912734
BET1L	54	1.36095	1.31476	1.19884	1.20954	1.10694	0.915444	0.945423	1.03643	0.97263	0.70064	0.727999	0.718962	1.14733	1.22063	1.04336	2.47414	2.63268	2.2643	0.75561	0.729816	0.704026	0.757396	0.697961	0.82931	0.689397	0.710836	0.759266	0.808198	0.917922	0.76359	0.693915	0.63979	0.717386	0.864671	0.769783	0.788661	0.698835	0.641567	0.666762	0.795582	0.828491	0.906518	1.06829	1.00796	0.89797	1.49478	1.66294	1.61445
BFAR	45	1.18218	1.199	1.11203	1.12411	1.10019		0.959517	0.848839	0.845546	0.850412	0.757301	0.843875	0.885633	1.15391		0.988229	1.00186	1.09762	1.19396	1.17898		1.02721	1.09383		0.871602	0.957403		1.53123	1.55425	1.5298	0.878444	0.89761		0.921563	1.08997		0.717354	0.901197		0.785708	0.884509	0.874537	1.03997	0.87693	0.957143	0.75326	0.831223
BGN	54	0.293479	0.301607	0.384562	0.803445	0.72132	0.624283	0.346325	0.392386	0.473018	0.364528	0.348837	0.452373	3.39489	4.68618	3.50579	0.335269	0.395259	0.428135	1.92914	2.65853	2.08574	0.617963	0.590887	0.527026	0.569508	0.493372	0.488067	0.770506	0.586547	0.836207	0.914411	0.610086	0.623861	0.337943	0.3273	0.544608	0.381031	0.26715	0.436127	0.267558	0.396202	0.273737	3.25108	3.43871	3.60847	0.579318	0.375708	0.575944
BHLHA15	27				0.863369	1.37658	0.741935							2.69357	1.75194	2.67485				0.528371	1.8352	0.751628	1.53216	1.39871	1.34611	0.373405	0.78868	0.61524				0.5373	1.01592	1.0241	0.738381	0.525397	0.800207	0.394588	0.536216	0.54327							2.66609	2.08097	2.83825
BHLHB9	18	0.965915		0.81055				1.14601		1.4834	1.14078		1.03665				1.34661		0.660592										1.04547		0.765718										0.983692		1.23143	2.16189		2.13182
BHLHE40	54	0.59449	0.691713	0.894654	0.606051	0.684779	0.681162	0.394682	0.385399	0.438302	1.32684	1.28812	1.39413	0.825009	0.869107	0.906169	0.935433	0.908803	0.959801	1.06033	0.965143	1.05794	0.913915	0.966736	0.936682	0.897246	1.06704	0.886005	0.962213	0.983533	1.10162	1.82229	1.89817	1.83971	2.28591	2.41217	2.1667	0.500843	0.598915	0.577894	0.397131	0.627466	0.55609	0.7076	0.70494	0.753923	0.59366	0.625576	0.634653
BHLHE41	9	1.14986						0.626154			0.789533						0.711253												0.885097												0.752744			0.661683
BICC1	54	0.571486	0.607771	0.547769	2.13372	2.2844	2.11492	2.71335	2.58199	2.40521	1.01646	0.844409	1.06394	1.66775	1.83565	1.61056	0.489487	0.475472	0.556567	0.56245	0.586895	0.612431	0.542561	0.420374	0.418045	0.591681	0.736991	0.568391	1.85673	1.73436	1.81926	0.315707	0.474326	0.397574	0.194089	0.390775	0.350334	0.208687	0.433993	0.362087	0.480195	0.430592	0.47926	1.54672	1.36696	1.42744	0.294733	0.422982	0.298878
BICD1	54	1.2635	1.46208	1.25775	1.34788	1.32798	1.35284	1.46585	1.47212	1.4765	1.03123	1.15064	1.07398	0.708501	0.610665	0.583338	0.817577	0.850904	0.863212	0.890656	0.967321	0.961619	1.44879	1.48711	1.36506	1.04467	0.978214	1.01321	1.45338	1.38168	1.48773	0.798137	0.87462	0.92358	0.724809	1.00945	0.696573	0.77734	0.932843	0.815407	0.931583	0.886839	1.04858	0.952382	0.984542	1.00423	0.425872	0.588792	0.413924
BICD2	54	1.44802	1.57565	1.45226	1.21779	1.2334	1.25121	1.1774	1.2935	1.24155	1.03406	1.06359	1.03678	0.818432	0.840916	0.833582	0.754974	0.728218	0.741485	0.873231	0.891384	0.914184	1.24909	1.30605	1.29115	1.14018	1.08049	1.14069	1.28002	1.46385	1.38025	0.806771	0.836245	0.849328	0.770301	0.774347	0.752731	0.804911	0.833301	0.8328	0.81788	0.788617	0.818098	1.64952	1.84893	1.64457	0.654899	0.724616	0.686273
BID	54	1.07306	1.07228	1.10932	1.03169	0.923993	0.966397	0.737596	0.583442	0.647621	1.03953	0.954781	1.05525	1.01286	0.981101	0.98429	0.828327	0.690663	0.747338	1.01501	1.13355	1.00291	1.1929	1.21217	1.27097	0.774842	0.817386	0.767116	1.39265	1.48343	1.6536	1.07418	1.09176	1.09463	1.11493	1.22174	1.1232	1.03768	0.990591	0.970559	0.958303	0.859075	0.870484	0.895044	0.769181	0.810507	0.700884	0.725162	0.662816
BIK	9		0.790802						0.523953			1.09012						1.04761												0.805741												0.455415			1.55205
BIN1	54	1.16049	1.21985	1.16502	1.34474	1.45857	1.53671	2.91122	3.03907	2.68297	0.78745	0.68571	0.876174	0.46599	0.453436	0.390782	0.65467	0.539904	0.710067	1.07546	1.04797	1.10361	0.588451	0.557234	0.517867	1.0318	1.00791	0.966312	1.47089	1.45901	1.37085	0.796191	0.79482	0.79153	0.384636	0.300967	0.269136	0.364751	0.256164	0.310973	0.512489	0.477074	0.542005	2.38252	2.33871	2.09466	0.909697	0.992699	0.897731
BIN3	54	0.770035	0.718438	0.783092	1.86543	1.99588	2.21275	0.989184	1.02769	1.08972	0.945336	0.91862	1.00266	0.901867	0.907717	0.870446	1.41918	1.26206	1.51673	1.10288	1.09158	0.986117	1.05015	0.988839	0.977958	0.920092	0.822867	0.769624	0.789309	0.782449	0.849429	0.95301	0.936192	0.924533	0.834403	0.747908	0.75532	1.15	1.07796	1.16019	1.08953	1.06209	1.03463	0.929086	0.940073	1.08288	0.868333	0.933515	0.91978
BIRC2	54	0.988068	0.986813	1.01499	1.17582	1.17613	1.23726	0.795506	0.820645	0.805515	1.09867	1.17235	1.11871	1.39587	1.41602	1.38374	1.01484	0.915425	0.871579	1.13445	1.07826	1.1664	1.03482	0.989448	1.00572	1.17345	1.10729	1.14636	0.878984	0.872147	0.845864	0.896993	0.878343	0.853034	0.772287	0.811494	0.819594	0.784292	0.857045	0.847954	0.846218	0.810352	0.683301	0.972326	1.00387	0.919005	1.10207	1.1804	1.07707
BIRC5	54	0.955693	1.00437	0.955487	1.33265	1.21723	1.37947	1.38586	1.11163	1.26008	1.0788	1.14633	1.03977	1.11023	0.968862	1.06771	0.768431	0.688696	0.704405	1.40767	1.19881	1.33642	1.1363	1.05596	1.09392	1.56592	1.39965	1.31448	1.08706	1.02545	1.05819	1.16127	0.995535	1.02027	0.888235	0.854526	0.829734	0.841739	0.728642	0.882515	0.829694	0.837917	0.859194	1.08428	1.01724	0.924296	0.575815	0.708668	0.676678
BIRC6	54	1.16674	1.16209	1.19774	0.784592	0.807967	0.813087	1.11843	1.16286	1.14914	0.824399	0.807192	0.863832	0.880491	0.824613	0.825093	1.26475	1.28942	1.26884	0.934991	0.902389	0.922161	0.978598	0.952752	0.978684	1.01004	0.999406	0.967799	0.877611	0.865768	0.888272	0.949597	0.893768	0.898238	1.10577	1.09281	1.09171	1.19093	1.17851	1.20559	1.1156	1.1975	1.16429	1.10515	1.1401	1.11536	1.42152	1.3884	1.37565
BLM	54	0.898605	0.946262	0.926546	1.09992	0.819296	0.906648	1.58487	1.53013	1.51852	1.24089	1.31719	1.16654	1.01296	0.926438	0.970241	0.676243	0.654334	0.627485	1.52483	1.618	1.5693	0.897569	0.775924	0.828348	0.891438	0.906894	0.894458	1.02379	1.03663	1.03397	0.92499	0.880403	0.906655	1.05635	1.10477	1.07842	0.921863	0.955164	0.962906	1.15356	1.07088	1.13616	0.77126	0.793003	0.775464	0.89516	0.878794	0.886306
BLMH	54	0.515333	0.448666	0.489892	0.68936	0.821381	0.778783	1.10455	1.0754	1.06707	0.762454	0.725631	0.751057	0.91825	0.851649	0.896864	0.886303	0.853217	0.89157	1.07303	1.04931	1.07206	0.918143	0.930462	0.932196	0.822933	0.803602	0.822814	1.60274	1.60634	1.59198	0.49187	0.519339	0.47995	1.34188	1.27646	1.26149	0.698134	0.735167	0.677937	0.680001	0.661788	0.648519	1.18411	1.18636	1.14515	2.14079	1.94881	2.06281
BLNK	54	0.591574	0.356775	0.671351	0.584854	0.629812	0.380285	0.516179	0.65259	0.676726	0.746395	0.555394	0.635315	2.49465	2.2348	2.83023	1.32123	1.01953	1.12719	0.697264	0.784536	0.334722	0.572644	0.441174	0.458848	0.721529	0.719359	0.620227	0.537257	0.540121	0.58427	0.913975	1.08648	1.11177	0.929767	0.945886	0.841993	0.814301	0.865148	0.681589	0.690052	0.584155	0.803642	0.8823	0.86837	0.887789	1.35698	1.66173	1.90795
BLOC1S1	54	0.824809	0.950776	1.00086	0.868948	1.05744	0.86337	0.951152	0.948	0.90569	0.703063	0.792046	0.754691	1.10922	1.08826	1.13672	1.183	1.24804	1.2115	0.877934	0.796648	0.730628	0.863567	0.85681	0.776026	1.08546	1.08085	0.857512	0.840404	0.96518	0.932116	0.970442	1.16656	0.89271	1.21872	1.51383	1.05609	1.27926	1.26197	1.043	1.09898	1.1502	1.05259	0.88582	0.971485	1.01516	0.857048	0.772476	0.762273
BLOC1S2	54	0.803888	0.807609	0.84386	0.856759	1.00545	0.8562	1.30777	1.38449	1.43996	0.876453	0.891665	0.896072	1.13542	1.08187	1.12402	1.13366	1.10878	1.14459	0.702263	0.691918	0.68032	0.860651	0.817243	0.887347	0.966942	1.07839	0.927617	0.96801	1.01836	1.04335	0.956988	0.937015	0.934391	1.2505	1.38058	1.36858	1.21896	1.26477	1.34394	1.22543	1.22862	1.31648	0.892076	0.9518	0.946245	0.715898	0.702827	0.71267
BLOC1S3	54	0.884068	0.832431	0.902911	0.931862	0.864427	1.04249	0.772393	0.741956	0.751407	0.931766	0.951165	0.854981	0.905065	0.921281	1.05679	1.55305	1.49254	1.43331	0.774929	0.735238	1.02772	0.863518	0.82201	0.883563	1.04024	1.06591	1.09106	0.956885	0.824295	0.859874	0.93421	0.889772	0.979816	1.16501	1.24502	1.14108	1.05167	1.12385	1.00866	1.09077	1.11447	1.27816	0.915507	0.778703	0.830587	0.926886	1.00286	1.0135
BLOC1S4	54	1.01828	1.09618	0.96329	0.814969	0.78265	0.85167	0.831152	0.771006	0.813216	0.629355	0.696828	0.646206	1.2807	1.16689	1.10313	0.885499	1.09614	1.05928	1.00074	0.926195	0.96411	0.836023	0.993301	0.993312	1.25926	1.06448	1.22881	0.937306	1.03388	1.01237	1.05124	1.01723	1.04654	1.39066	1.45048	1.40892	1.079	1.15158	1.22084	0.961601	1.022	1.0355	0.876133	0.923683	0.941984	0.483502	0.647927	0.683339
BLOC1S5	54	0.897752	1.04277	0.996457	1.01227	0.746626	0.758891	0.98283	1.07502	1.00867	0.65506	0.856945	0.641676	1.16617	1.24384	1.11214	1.16599	0.847877	1.28887	0.898462	0.915986	0.93878	0.924283	0.892233	0.862071	0.98953	0.998359	1.06421	0.869471	0.972621	1.01957	0.840207	0.931117	0.876459	1.30518	1.48131	1.47274	1.27971	1.31533	1.34179	1.08928	1.12378	1.28777	0.928722	1.01505	1.00992	0.87177	0.711564	0.810655
BLOC1S6	54	1.04068	1.1603	1.11481	0.666606	1.00913	0.817656	0.973522	1.0535	0.904143	0.87306	0.906556	0.860319	1.09399	1.18753	1.2247	1.05485	1.6932	1.08138	0.897745	0.886701	0.817574	0.801124	0.860065	0.961618	1.01142	1.09309	1.09453	0.922225	0.992725	0.98771	0.869943	1.11799	1.07585	1.23136	1.1651	1.31024	1.15496	1.03775	1.30988	1.05196	1.28861	1.05181	1.11647	1.133	0.827623	0.74287	0.737039	0.859839
BLVRA	54	0.491192	0.455523	0.521476	0.687786	0.75426	0.730671	0.648179	0.649839	0.656106	1.01741	1.05041	1.04988	1.02696	1.04446	1.09284	1.50746	1.52464	1.45134	0.591765	0.594025	0.58183	0.764235	0.76604	0.783557	0.747161	0.75655	0.762504	0.583529	0.579243	0.596427	1.47294	1.50909	1.55984	1.26307	1.29686	1.28977	1.56667	1.52382	1.52489	1.09688	1.11882	1.10039	1.36882	1.50571	1.36554	1.25211	1.2725	1.3016
BLVRB	54	1.18187	1.19526	1.16876	0.558864	0.591811	0.6168	0.58831	0.525951	0.56864	0.880988	0.866503	0.855584	0.607348	0.613212	0.637685	2.11237	2.16385	2.08345	0.846304	0.798582	0.820655	0.796711	0.807659	0.846345	1.20411	1.19485	1.21658	0.731826	0.704955	0.700516	1.09991	1.12611	1.09585	1.16774	1.20245	1.15697	1.17197	1.22973	1.15995	1.11039	1.12093	1.13098	0.651045	0.643585	0.660814	1.97962	2.10015	1.97397
BLZF1	54	1.2258	1.16423	1.18287	1.10277	1.016	1.13051	0.928524	0.780256	0.945801	1.07431	1.07706	0.951634	0.879815	0.8988	0.986638	1.31091	1.01875	1.28116	1.00925	0.998218	0.981034	1.20969	1.20862	1.18811	1.13098	1.19236	1.19153	0.964023	1.03913	1.03982	1.07203	0.974395	1.09154	0.902838	0.930465	0.938891	0.842352	0.914551	0.805785	0.912216	0.845536	0.861779	0.723316	0.641223	0.642265	1.04832	1.06548	1.12271
BMF	18				1.15431	1.14235								1.38396	1.3587					1.16534	1.12461		1.08353	1.243		0.832914	1.21225					1.07733	1.16039		0.868787	1.18373		0.980956	1.25179								0.823894	1.30282
BMP1	54	1.07139	0.828345	1.05567	1.92155	1.6879	1.99602	0.932406	0.643663	0.775395	1.09574	0.768744	1.0072	1.44995	1.31682	1.40506	0.859869	1.06165	0.701959	1.10599	1.0452	1.11375	1.24899	1.33098	1.35028	1.05393	0.996791	1.03585	0.709975	0.644095	0.761176	0.922934	0.800511	1.01936	0.317947	0.722944	0.505239	0.391956	0.649352	0.587639	0.764918	0.53271	0.704791	1.90943	2.43232	1.85172	0.414593	0.665306	0.58698
BMP2K	54	1.47139	1.49761	1.57507	1.62028	1.79391	1.80885	1.4959	1.22493	1.40515	1.09402	1.04981	1.0546	0.869888	0.874237	0.840256	0.764322	0.822154	0.817857	0.86233	0.86714	0.903069	1.03874	0.996468	0.96899	1.35699	1.26965	1.42313	1.23376	1.18021	1.18569	0.861556	0.885889	0.89457	0.823827	0.834405	0.788772	0.758521	0.762964	0.727766	0.769655	0.723997	0.743025	0.867746	0.817146	0.832714	1.10399	1.07936	1.08508
BMP3	9					0.718515									0.923797						0.834076			0.706689			5.06722						0.887191			0.599272			0.791538									0.850978
BMP4	9					2.41707									1.00852						1.17279			1.46445			1.05828						0.921212			0.999363			1.21345									0.92295
BMP5	27	0.506188	0.571568		0.627485			0.818084	0.610888		4.22988	3.08278		0.661725			0.772278	0.775595		0.670162			0.750824			0.70814			0.658198	0.755803		0.784648			0.680278			1.4231			2.27918	1.38223		0.658139	0.514625		0.472604
BMP7	54	0.914444	0.721406	1.38998	0.637903	0.831437	0.520219	0.9641	0.972849	1.11891	0.734664	0.682885	0.783764	0.657198	0.477507	0.490534	0.85711	1.10883	1.03934	0.865541	0.632509	0.628649	0.903155	0.689801	0.648528	0.610631	0.438373	0.434504	0.605895	0.591089	0.783122	0.676718	0.993598	0.58308	1.03277	1.07883	0.96955	2.10118	2.61447	2.95415	2.6697	2.66317	2.03992	0.76147	0.808099	0.97689	2.43356	3.02706	4.00379
BMPER	45		0.848423	0.916809	6.17007	4.09841	1.8307		0.578238	0.57701		0.764148	1.08193	0.542646	0.744342	0.681567		0.921991	0.656134	0.744157	0.740685	0.781323	0.509765	0.879276	0.807796	0.68916	0.781563	0.898068		0.646187	0.674761	0.591626	0.835082	0.915778	0.865954	0.86974	0.858634	1.13215	1.0606	1.13161		0.939562	0.554145		1.40753	1.47799	1.03041	0.648933	1.12729
BMPR1A	54	0.705874	0.645363	0.535428	3.29071	2.50179	3.26729	1.47414	1.44978	1.39759	0.886448	0.784522	0.795248	1.17061	1.33116	1.1768	0.786161	0.669775	0.631227	0.936609	0.95168	0.960612	0.743713	0.722457	0.721711	0.79432	0.910191	0.906621	1.04137	1.01633	0.938482	0.72606	0.71761	0.750771	0.704589	0.851341	0.802559	0.642084	0.652025	0.570752	0.872308	0.799177	0.653249	0.840107	0.891772	0.703649	0.672299	0.853411	0.738017
BMPR2	54	1.09452	1.37492	1.23564	1.4619	1.42843	1.29913	1.23716	1.23826	1.20945	1.24456	1.06616	1.01386	1.06685	1.037	0.846596	1.14136	1.31429	1.14038	1.0664	1.06398	1.02949	0.946054	0.940317	0.815482	0.890012	0.937246	0.821181	0.816201	0.679376	0.765851	0.785566	0.853598	0.813067	1.02689	1.07731	0.99958	0.889915	0.855222	0.838324	1.05289	0.803241	0.949744	1.15187	1.15471	1.27657	0.775141	0.786438	0.733162
BMS1	54	0.993647	1.04753	1.06365	1.06396	1.03198	0.989424	1.23259	1.33199	1.29432	1.00861	0.975751	0.975548	1.08916	1.02012	1.07357	0.899303	0.788303	0.827215	1.0642	1.08349	1.04088	1.11576	1.17199	1.14835	0.996147	1.01282	1.02474	1.1498	1.2481	1.23005	0.744424	0.742223	0.704891	1.20184	1.23424	1.15985	1.02859	1.07254	1.01335	1.00057	1.06124	1.04177	0.961619	0.993224	1.01286	1.19837	1.18774	1.13796
BNC1	27	0.889513	1.46375	0.653507				0.90046	0.67819	0.258852	1.10081	1.19951	0.510512				0.661589	0.782544	0.244129										1.36688	1.30669	1.20073										0.65347	0.648411	0.235185	1.07727	0.915772	0.635769
BNC2	54	1.37627	0.750605	0.597934	5.33824	1.73193	1.22922	2.21463	2.55513	2.27761	1.29667	0.77177	0.752164	0.68575	0.394964	0.615715	0.392038	0.308217	0.318037	0.703122	0.672537	0.866997	0.76501	0.725208	0.937333	0.740088	0.769954	1.02329	1.39667	1.04012	0.974024	0.489884	0.473104	0.91718	0.445724	0.334218	1.19512	0.448276	0.5103	0.660027	0.462554	0.307803	0.414019	2.8597	3.04498	2.38165	0.491858	0.355475	1.16879
BNIP1	54	1.26819	1.27331	1.24034	1.10423	0.940475	1.0139	0.983526	0.99657	1.04034	0.767868	0.741607	0.782522	0.923676	0.875299	0.894031	1.26574	1.27987	1.29036	1.02832	0.85283	0.87107	0.838879	0.826115	0.824984	1.00047	0.945013	1.01667	1.06658	1.06036	1.14118	0.850026	0.739239	0.831672	1.35243	1.31801	1.4872	1.21375	1.18807	1.33021	1.19056	1.22594	1.17548	1.04863	1.07982	1.05585	1.00469	1.01647	1.03784
BNIP2	54	1.32101	1.28539	1.21795	1.1883	1.21512	1.22924	1.09956	0.925259	0.992552	1.65875	1.6739	1.62746	0.883874	0.915157	1.03829	0.700611	0.859584	0.653298	0.769022	0.848791	0.858701	1.02917	1.08084	1.04362	0.773831	0.904228	0.969726	1.02184	1.06715	1.01231	1.15018	1.1239	1.26531	0.803471	0.935907	1.01986	0.588453	0.720144	0.847833	0.945863	0.993929	0.95909	0.99944	0.951309	0.998535	1.43742	1.0338	1.3309
BNIP3	54	0.702838	0.51665	0.742526	3.69616	2.50443	3.78438	0.789815	0.628449	0.66662	0.719652	0.529214	0.537455	0.572569	0.621438	0.58148	0.938399	0.9339	0.938021	1.03349	0.981282	1.12343	0.698757	0.581324	0.651429	0.836858	0.640681	0.910362	0.765834	0.722636	0.797471	0.65051	0.496799	0.405089	1.91636	1.92039	2.91684	1.02594	0.729386	0.936945	1.18569	1.1144	1.13242	1.09322	1.21247	1.14339	0.802892	0.951692	0.963071
BNIP3L	54	0.82353	0.696879	0.795654	2.45847	2.49342	2.47404	0.749733	0.606965	0.764228	0.961538	0.943327	0.960241	1.09536	0.964612	0.892396	1.45479	1.48575	1.49522	1.1267	0.920382	0.987575	0.608804	0.721197	0.866641	0.621215	0.690724	0.77267	0.867608	0.743983	0.788728	0.684833	0.673128	0.693352	1.60538	1.45213	1.53762	1.57546	1.26082	1.344	0.949987	0.961626	1.00068	0.902056	0.901213	1.01747	0.97001	0.745003	0.756007
BNIPL	36	0.596222	0.645711	0.726874		0.399623		0.511201	0.531596	0.617253	0.662202	0.708674	0.71949		0.4891		0.805232	0.719936	0.885266		0.433085			0.489888			0.457891		0.639966	0.677947	0.637935		0.82289			0.57945			1.12881		0.963783	0.804106	0.814513	1.15525	1.15465	1.05944		0.316132
BOC	9				1.29277									1.1867						2.21795			0.944187			0.940588						1.12296			0.97492			0.575683									0.977173
BOD1	54	0.877703	0.853049	0.908776	1.20375	1.28834	1.24893	1.47917	1.57611	1.33005	0.738601	0.677501	0.839147	0.903859	0.898092	1.01057	0.744239	0.919109	0.794371	0.942175	0.89221	0.958808	0.862462	0.80382	0.880437	0.878302	0.646241	0.706235	0.921602	1.0194	0.952143	0.788955	0.642954	0.68818	1.34045	1.47434	1.42357	1.41926	1.38148	1.39759	1.48021	1.52543	1.46172	1.51	1.7031	1.49192	0.868063	0.700836	0.640997
BOD1L1	54	0.969595	0.942871	0.938025	1.10568	1.04254	1.05066	1.12004	1.1809	1.14792	0.966394	0.990432	0.949196	1.39564	1.36184	1.3469	1.00176	0.980549	0.987572	1.08815	1.04281	1.10135	1.01241	0.972689	0.979036	1.10555	1.14326	1.14163	1.01382	0.995876	1.00045	0.952889	0.948585	0.931674	1.19351	1.16091	1.28499	1.08356	1.0972	1.10978	1.1169	1.12634	1.11951	1.00845	1.02479	0.977181	0.756279	0.72379	0.750875
BOK	9				0.805202									0.974948						1.86786			0.984288			0.83366						1.27763			0.850131			0.809829									0.692341
BOLA1	54	0.686738	0.582792	0.455486	0.703951	0.732833	0.786234	0.900047	0.997221	0.883189	0.866964	0.994864	0.813328	1.0558	1.07523	1.09423	0.873112	0.748846	0.708317	0.827805	0.980244	0.942665	0.723282	0.81025	0.670573	0.980283	0.939613	0.922028	0.562235	0.652494	0.450571	0.928252	1.02736	0.923813	2.45412	2.36193	1.97984	2.09067	2.20857	1.96008	1.89539	1.8449	1.74592	0.783	0.679966	0.678717	0.688001	0.932469	0.760017
BOLA3	54	0.815054	0.676052	0.71535	0.986671	0.784887	0.824272	1.0377	1.0547	0.983656	1.02384	1.02897	0.94121	0.631304	0.582787	0.63526	1.1724	0.966185	1.14717	1.32508	1.24782	1.3277	0.975738	0.865422	0.876235	1.17767	1.13343	1.19981	0.995619	1.14875	1.09866	0.900949	0.798348	0.840425	1.36407	1.30768	1.48765	0.94017	0.903501	0.914298	1.16182	1.18442	1.18207	1.22586	1.14626	1.19399	1.56915	1.47068	1.59039
BOP1	54	1.08908	1.12357	1.07719	1.21763	1.36202	1.2229	1.36912	1.5036	1.43136	0.998502	1.07033	1.05796	1.00415	1.02504	0.908359	0.906957	0.764936	0.94503	1.44101	1.23047	1.57133	1.493	1.22308	1.5137	1.30726	1.23384	1.24612	1.045	0.963015	0.901154	1.02483	0.922665	0.961417	1.07463	1.17347	1.14225	0.861661	0.949425	0.913203	1.01766	0.891597	0.934939	1.0713	1.23441	1.19667	1.2722	1.2562	1.22901
BORA	54	1.57454	1.53227	1.49692	0.984005	1.00291	1.06214	1.43419	1.92343	1.81215	1.41408	1.09882	1.20923	0.844019	1.00912	0.878327	0.645304	0.717051	0.77474	0.843593	0.864538	0.942932	1.654	1.44653	1.44739	1.40748	1.2653	1.24279	0.811776	0.770403	0.887245	0.906139	0.940755	0.957403	0.806287	0.728939	0.85037	0.598021	0.721585	0.669771	0.571739	0.5789	0.656391	0.581811	0.778233	0.643193	0.966592	0.765597	0.836956
[truncated: 10,367 more rows]
[truncated: 6 more columns]

## Sheet: Proteome Data
																																													Cell line	SKBR3	MCF7	LCC2	HCC70
																																													Subtype	Lu	Lu	Lu	BaA
																																														Ratio to pool (131)
[truncated: 11,409 more rows]
[truncated: 121 more columns]

## Sheet: TMT labeling
	TMT tag \ Set	Set 1	Set 2	Set 3	Set 4	Set 5	Set 6
[truncated: 26 more rows]
