# Supplementary material for: PTEN and DNA-PK determine sensitivity and recovery in response to WEE1 inhibition in human breast cancer
Source: eLife. 2020 Jul 6;9:e57894. doi: 10.7554/eLife.57894 (PMC7338058; doi:10.7554/eLife.57894)
Supplement: Supplementary file 3. [file elife-57894-supp3.xlsx]

## Sheet: Sheet1
Analysis_name	BT20_R1	BT20_R2	BT20_R3	BT549_R1	BT549_R2	BT549_R3	CAL51_R1	CAL51_R2	CAL51_R3	HCC1143_R1	HCC1143_R2	HCC1143_R3	HCC1187_R1	HCC1187_R2	HCC1187_R3	HCC1419_R1	HCC1419_R2	HCC1419_R3	HCC1569_R1	HCC1569_R2	HCC1569_R3	HCC1937_R1	HCC1937_R2	HCC1937_R3	HCC1954_R1	HCC1954_R2	HCC1954_R3	HCC38_R1	HCC38_R2	HCC38_R3	HCC70_R1	HCC70_R2	HCC70_R3	MCF7_R1	MCF7_R2	MCF7_R3	MDAMB157_R1	MDAMB157_R2	MDAMB157_R3	SKBR3_R1	SKBR3_R2	SKBR3_R3	SUM149PT_R1	SUM149PT_R2	SUM149PT_R3	T47D_R1	T47D_R2	T47D_R3
Cell_line	BT20	BT20	BT20	BT549	BT549	BT549	CAL51	CAL51	CAL51	HCC1143	HCC1143	HCC1143	HCC1187	HCC1187	HCC1187	HCC1419	HCC1419	HCC1419	HCC1569	HCC1569	HCC1569	HCC1937	HCC1937	HCC1937	HCC1954	HCC1954	HCC1954	HCC38	HCC38	HCC38	HCC70	HCC70	HCC70	MCF7	MCF7	MCF7	MDAMB157	MDAMB157	MDAMB157	SKBR3	SKBR3	SKBR3	SUM149PT	SUM149PT	SUM149PT	T47D	T47D	T47D
Subtype	BaA	BaA	BaA	BaB	BaB	BaB	BaB	BaB	BaB	BaA	BaA	BaA	BaA	BaA	BaA	Lu	Lu	Lu	BaA	BaA	BaA	BaA	BaA	BaA	BaA	BaA	BaA	BaB	BaB	BaB	BaA	BaA	BaA	Lu	Lu	Lu	BaB	BaB	BaB	Lu	Lu	Lu	BaB	BaB	BaB	Lu	Lu	Lu
Replicate	R1	R2	R3	R1	R2	R3	R1	R2	R3	R1	R2	R3	R1	R2	R3	R1	R2	R3	R1	R2	R3	R1	R2	R3	R1	R2	R3	R1	R2	R3	R1	R2	R3	R1	R2	R3	R1	R2	R3	R1	R2	R3	R1	R2	R3	R1	R2	R3
A1BG	0.0392063	0.0884119	0.304073	0.619543	5.8125	6.7228	3.5911	7.95187	6.43253	7.95148	2.19304	3.69519	0.244319		0.0302177	3.97672	2.32099	2.10428	2.55639	1.65175	0.173284	1.77508	1.2289	1.33846	0.0355759	0.119109	1.74716	1.37529	3.43514	4.88255	0.140118	0.488513		3.52343	3.2504	2.38585	6.6741	2.06246	0.634405	0.354325	0.0192605	0.0208349	0.119833	0.0946513	0.0983729	4.31075	1.32141	3.46979
A1BG-AS1	0.455282	1.1453	2.07047	3.35892	3.79904	3.31729	1.94544	3.26095	1.91099	5.16442	5.49234	4.41618	0.396252		0.125669	1.72423	1.87229	1.60561	1.06119	1.66533	1.45322	3.35773	2.3397	2.59586	0.686166	0.771182	0.8041	4.88776	6.21361	8.55301	0.886509	0.543555	0.31798	2.85008	3.69735	2.49115	2.79867	3.14767	1.75495	1.8941	0.989924	0.999331	1.53094	0.52556	1.08648	1.93137	2.24703	2.52729
A2ML1	1.07657	1.06147	0.493364				2.29097	1.28115	1.63579	3.30593	2.62713	2.64827	0.616518	0.131795		0.0292335	0.301377	0.221885	0.0559065	0.0238455	0.0130895	0.24801	0.49513	0.241953	0.271534	0.32616	0.775928	0.173643	0.0443686	0.142405	12.6913	13.7963	10.7518	0.119335	0.130323	0.0546558				2.69266	2.91004	2.92344	7.34084	8.83901	6.91813	0.0458354	0.146102	0.0356023
A4GALT	0.0658969	0.0989787	0.0986367	1.45235	5.40051	5.03885	0.254455	1.39116	1.03352	14.2591	10.7833	10.4834	0.371439	0.0925048	0.0263878	1.54292	0.800709	1.12396	1.10801	0.888034	0.561949	1.09498	0.713977	0.329289		0.0773413	0.335323	0.0207386		0.510471	0.496929		0.432393	5.26423	4.66409	1.84963	1.5058	0.882583	0.45863	0.0230574	0.0215393	0.0221758	0.892776	1.4669	2.47238	0.0606283	0.607919	0.297271
AAAS	11.9049	16.7767	14.7245	14.0685	16.0257	15.8671	30.4776	34.5893	32.0923	18.3229	15.6909	12.8246	9.01233	9.8511	9.89306	10.5982	10.6186	12.2891	17.4914	20.3189	18.9495	21.0643	16.6581	11.6167	16.189	11.5246	14.3825	11.3815	12.276	11.4215	13.1049	10.4146	10.8703	17.8323	16.9401	14.6052	22.912	24.2027	13.3097	15.6415	17.3725	12.2261	7.25829	5.11373	11.5009	29.7976	32.2782	29.1317
AACS	9.40499	16.4792	16.0392	1.92051	3.59846	4.00377	5.35435	6.2867	5.51756	29.151	23.955	22.1589	8.52789	8.21594	7.77399	14.6243	14.5608	12.4418	8.31012	8.03509	5.42269	18.7502	15.2925	9.724	8.14097	6.90791	9.68413	26.1893	25.653	31.1952	28.8511	28.8789	25.7121	13.7332	14.2613	10.7345	8.44484	6.42208	3.87551	14.8439	12.5011	11.7883	4.87639	4.50255	6.22389	8.04954	10.4092	9.11928
AADAT						0.0953158	7.0183	5.43528	4.819	1.21293	1.7673	0.841362	4.39582	4.16334	3.90834	1.38937	0.94658	1.10714	4.13141	3.42015	3.51902	1.27043	0.818164	1.4224	0.988366	0.8679	0.887095	1.80022	1.50739	2.32967				1.15572	0.700937	1.18038	2.46821	1.87849	1.71486	0.386223	0.464248	0.63615	3.09843	2.24006	2.90572	0.213044	0.0131225	0.158164
AAED1	12.9699	10.0927	9.75694	16.8931	12.9872	14.4465	4.40502	6.07669	6.18746	11.8042	11.1023	12.2286	1.11313	1.61651	1.71635	0.892814	1.07511	0.648243	6.50094	5.87441	4.25386	10.7864	10.0513	11.0703	8.05222	7.61496	4.87119	7.26011	8.15551	6.2392	4.7066	5.79481	4.86638	1.66223	2.07533	1.35366	5.42963	6.04058	6.44635	1.73061	2.04021	2.22548	2.46939	2.1801	2.48387	1.61757	1.91721	1.21012
AAGAB	146.711	121.736	104.186	36.5719	29.0939	26.4191	36.6	37.3043	32.4957	54.9751	45.8507	53.3177	17.0051	17.7557	18.2993	26.2182	22.723	29.3421	27.0942	27.5317	23.8592	52.4855	58.7344	54.1253	60.1299	56.6643	49.0362	33.1614	32.4692	26.4555	33.4832	34.9236	24.5343	51.9904	59.8283	59.1909	31.1054	36.395	36.7909	18.1473	19.1976	16.3397	29.313	23.2034	20.2075	61.7921	67.6276	54.3577
AAK1	16.6743	13.5266	15.805	3.09788	4.41433	3.50196	2.9589	3.73772	2.96609	3.64089	4.28601	3.82994	2.3024	2.31202	1.64474	6.0287	5.08475	4.82155	3.31282	3.52425	3.48592	7.05403	5.65592	7.10432	7.28852	7.9747	9.01818	5.21652	3.55849	5.55674	4.93107	4.83951	7.68112	3.08878	2.10891	2.37738	11.247	9.65031	7.07735	7.27434	5.11108	7.39448	2.49388	3.98766	2.64532	1.67308	1.73661	1.67055
AAMDC	8.09598	11.8773	4.32115	32.7654	31.1463	21.0521	10.3605	12.0064	8.13812	27.9985	23.8525	27.9297	19.7974	23.4422	15.9942	14.6559	11.9453	23.9745	47.1698	46.3585	38.7422	28.7273	33.5193	28.5941	28.6419	30.3797	20.6904	28.5743	32.2506	30.459	20.5551	17.8709	13.1764	9.94582	12.8616	10.1393	30.3119	38.645	35.2507	4.58633	8.17566	6.62294	13.9768	6.63299	6.32014	19.2166	11.5719	17.8285
AAMP	65.2098	69.3039	78.9831	32.8875	37.2192	33.3267	64.7689	54.1042	60.2679	46.8369	44.2116	38.9751	31.1571	41.4926	30.3598	43.1059	39.1888	51.8093	54.1557	62.9177	65.5767	40.0375	40.0553	23.2918	61.7391	46.7278	60.3696	72.5263	67.7228	70.527	42.9769	41.4654	36.4821	32.9468	35.7454	37.5134	66.4699	77.7488	58.28	50.8936	56.9245	54.6534	21.0559	14.2802	27.6577	45.1123	42.8584	37.2857
AAR2	23.374	28.4215	26.1379	16.346	15.3902	18.0504	12.9072	13.8635	12.4644	24.2843	21.5371	21.4979	12.2989	12.5896	10.0842	30.7173	27.5537	28.6602	22.9441	27.2679	20.3571	16.5766	13.6309	11.2232	9.06919	7.16576	9.02933	17.0398	17.9948	15.5216	9.05514	9.81796	9.96677	9.72051	9.03586	7.1036	16.9129	20.9541	12.192	29.6963	26.2685	24.7205	6.95403	4.33557	8.43999	19.2723	23.0034	18.6175
AARD	0.611907	0.357369	0.385364	13.3271	13.1875	12.4663			0.158034	54.2216	49.3701	55.0228	0.35183	0.331441	0.0216985	0.305113	0.274398	0.291451	161.574	151.354	139.898	0.269774	0.285476	0.738214	0.179744	0.343981	0.204445	13.6401	13.5015	12.6088	10.9832	9.7628	10.2355	1.17091	1.50771	1.51471	3.42887	4.00345	4.18049	1.97751	3.01739	3.26387	6.0223	3.95138	5.62473	1.5186	1.92765	1.48042
AARS	90.1169	85.8279	79.8402	77.6279	75.8493	73.6895	78.5642	76.8814	93.3624	53.9563	49.8722	45.5698	47.997	43.8624	42.6528	53.8935	53.2916	53.58	34.8733	36.0433	33.4375	99.2629	94.226	83.6115	66.0062	58.5618	57.7541	48.8364	53.0127	48.6848	146.352	151.849	146.579	53.7363	51.9193	45.0056	34.1282	37.5685	29.9026	27.3988	21.3814	16.3315	60.6261	44.0337	51.733	82.8065	87.8862	74.3582
AARS2	3.31965	7.14303	5.75655	1.89038	3.10332	2.81209	6.1387	9.14194	6.70022	7.67529	6.92226	5.9935	5.07015	3.98732	4.52904	5.83526	4.2555	4.61389	9.64355	8.84445	6.72208	7.24949	4.53458	3.57164	3.19857	3.46908	4.21661	2.12549	1.63862	2.74021	2.75849	2.7587	3.15308	3.02011	2.51191	2.03282	4.02521	3.17571	1.55889	5.055	2.25771	2.85907	2.76021	2.89695	3.49004	2.36008	2.82725	2.4307
AARSD1	11.346	11.8941	11.898	4.96504	5.86855	5.62108	13.3081	14.5145	16.1077	6.91915	7.22357	6.47281	8.31724	7.07451	6.47719	6.95645	6.59674	4.37474	8.84538	10.7921	12.6587	17.6751	14.941	13.1955	16.769	17.0711	13.5947	12.0915	12.5843	12.308	9.44638	7.56081	8.60275	4.02784	4.72899	4.47142	12.0338	15.1217	10.4679	9.72883	7.41043	6.66583	19.3214	11.4508	18.0926	17.9576	14.1004	14.3888
AASDH	5.66942	4.84818	3.84351	5.41449	4.89608	3.99881	6.9717	5.06324	6.08577	15.214	14.8974	14.1318	4.63378	6.53078	4.09843	6.86035	6.10865	5.79728	7.45156	6.33105	6.68091	9.58625	10.5062	12.0429	6.51176	7.08629	7.99754	7.24528	6.1492	5.82086	2.02985	2.12592	2.07483	4.65356	5.01519	4.79663	3.17208	3.55819	3.93332	3.68845	4.26604	6.41887	2.01273	2.18429	2.94867	8.04371	8.32395	6.35736
AASDHPPT	52.5617	43.8978	47.6685	58.7671	46.0994	40.8544	39.3236	38.4331	35.7192	21.89	26.4713	28.6173	28.513	34.7697	39.2399	9.3631	9.03654	9.42374	28.327	24.6684	27.4782	25.9591	28.8667	33.8536	28.2746	25.1487	23.5618	25.4254	23.3565	19.8112	16.5154	16.2384	14.3945	10.0169	9.02304	11.3473	26.9679	29.3334	35.1616	15.9776	17.4521	19.7569	17.9797	15.2952	16.2542	25.4698	26.9358	26.2304
AASS	1.1283	0.663368	0.955689	0.747127	0.696026	0.548817	10.5411	9.12286	10.4349				9.50916	11.0117	9.53988			0.012797	1.04146	0.937871	0.85		0.0659736	0.0986589	0.458321	0.550506	0.298322	0.129458	0.132045	0.178284			0.012345	0.208605	0.204738	0.178971	2.49424	2.57843	2.8265	0.0621408	0.0248806		0.924899	0.697077	0.37439	0.782059	0.777944	0.837231
AATF	53.7205	44.5136	39.5904	23.2111	21.7235	20.8218	25.0866	26.2793	24.391	11.2699	11.4896	10.7562	12.5897	13.8952	12.7312	8.07577	6.90986	7.78549	18.4691	17.8729	19.7832	32.0368	29.9756	29.7696	50.2552	43.3699	41.3508	20.7666	21.8908	21.2974	12.6139	14.6603	12.5447	7.28972	5.4685	6.88425	24.9731	26.2808	29.3261	11.169	11.95	11.3464	19.1056	14.6765	14.5118	17.3891	16.7834	12.4133
AB019441.29	3.15164	5.4999	4.23733	5.87455	5.05055	4.40792	4.28479	4.9745	3.3348	4.61404	4.39686	5.7116	10.0623	11.7647	6.84565	1.70274	1.77004	2.31099	6.7288	6.51455	6.23435	5.18515	5.70745	6.03	5.5446	5.6394	6.15565	3.22554	4.1422	4.35737	7.3885	5.67925	6.2497	4.70083	5.2913	4.26721	5.17965	6.8697	9.0921	3.97214	5.533	4.69762	3.06576	1.27304	4.32169	4.54797	4.65878	5.9007
ABAT	12.5715	11.7915	12.2873	0.0217202	0.0170128	0.53119	0.71354	0.905793	0.792419	0.738505	0.52981	0.49297	0.392725	0.374084	0.766325	2.32866	2.41114	3.44755	1.67717	1.24914	2.13423	4.63314	4.10119	3.66775	1.11381	1.5277	1.68752	0.395695	0.415527	0.510807	0.997567	1.05474	1.13563	19.2893	21.3964	16.7779	0.884508	1.14648	0.878138	0.342826	0.202454	0.059941	0.77368	0.531107	0.563151	4.04228	4.58159	3.4085
ABC7-43041300I9.1	0.25708	0.16826	0.24462	0.303047	0.178608	0.167765	0.0182237	0.0766015	0.253266	0.347191	0.489907	0.250655	0.0196532	0.0943835	0.0383966	0.116602	0.0432154	0.142507	0.0881235	0.0366327		0.0781165	0.051694	0.0094654	0.126244	0.0075819	0.0262892	0.136187	0.065472	0.217886	0.0256695	0.172149	0.115413	0.062111	0.0223207		0.260214	0.333819	0.564285	0.0734695	0.223225	0.09861	0.234868	0.0649325	0.331516	0.298951	0.196498	0.0565185
ABCA1	1.92547	1.54703	1.40849	3.50962	3.20425	2.0682	1.00169	1.07667	0.961304	0.889836	1.01166	1.14845	1.67644	1.74042	1.45751	0.703921	0.600329	0.68161	5.66887	5.81345	5.50024	2.67801	2.82311	2.47294	0.424566	0.3613	0.326112	1.62756	1.50428	1.34565	2.40772	1.84951	1.66664	0.63622	0.910569	0.778632	4.67997	5.57146	4.93823	1.20611	1.92441	1.31894	3.42634	3.05529	3.7174	0.0418665	0.130945	0.00436786
ABCA11P	2.09271	2.58956	1.51	0.76997	0.442326	0.60662	1.71523	1.51937	2.01758	0.58796	0.559205	1.05679	0.75707	1.18678	1.0717	1.19728	1.32905	0.85932	0.579555	1.15124	1.02576	0.97929	0.559805	0.73707	0.373636	0.48171	0.615475	1.32533	1.02999	0.847075	0.363743	0.249422	0.359959	0.67077	0.899995	0.581305	1.98119	2.00172	2.00765	0.674745	1.25308	0.94229	1.6755	1.58895	1.68276	0.957465	1.00383	1.20362
ABCA12	4.83047	3.58424	4.40608	0.00748074	0.0132122	0.0285243	0.0714836	0.0170129	0.836133	0.0261745	0.0329025	0.0144353			0.0100387	3.84005	3.23301	4.08805	0.019838	0.0420246	0.00924294	1.18749	1.10934	1.52422	7.5882	8.79417	5.15552	0.745265	0.781775	1.57411	4.80594	5.25376	5.21381	16.9006	17.2076	21.3098				7.63304	8.98177	12.4246	2.65803	4.673	2.38031	3.9215	1.77821	2.59181
ABCA2	0.359711	2.14613	2.16495	0.484871	0.743518	0.883119	1.68529	3.97092	3.74022	1.06067	3.51928	1.1456	3.30866	3.62055	5.38697	7.16408	4.08573	3.82573	3.47379	3.42759	1.36722	1.40906	1.17304	1.02313	0.445949	0.199451	3.64956	1.75696	1.41418	3.67632	3.74663	2.68634	3.58731	11.2642	9.08235	5.9378	1.23467	0.781959	0.584043	8.17896	2.4959	3.68619	0.276413	0.0994218	0.905927	6.26524	9.06301	5.86483
ABCA3	0.692368	0.842553	0.636105	8.94177	13.0436	12.2824	2.4181	2.17253	2.42894	4.47773	3.50709	3.72281	2.36878	1.38148	1.59177	7.35183	6.15226	5.75221	0.597801	0.232093	0.132602	0.846234	0.502891	0.385978	0.443295	0.660697	0.722664	2.0424	3.29515	3.41529	0.855163	1.39728	0.931471	5.10235	4.49803	4.07995	0.638319	1.14824	0.372205	9.19656	5.53983	5.05027	0.647877	0.405214	0.675567	8.89515	11.7574	10.2527
ABCA4	0.504714	0.505459	0.494755			0.0126335	2.57889	1.20635	2.0307	0.0164154	0.0468816	0.770758	2.33193	3.71524	2.37952	0.150796	0.152047	0.145128	0.0290133	0.173782	0.100153	0.830642	0.906915	1.17079	0.334459	0.575362	0.661996	1.68005	3.19109	1.65578	0.0862507	0.0630702	0.195081	0.014332	0.23323	0.0411893	0.0852486	0.0473183	0.00519469	0.266817	0.550884	2.6989	0.376675	3.06869	0.71058	0.138038	0.153651	0.140994
ABCA5	1.54258	1.92032	2.38041	12.8476	11.2521	10.7966	0.521807	0.239255	0.382454	1.79347	2.49443	1.36362	3.78744	3.09993	3.78773	5.20388	4.68968	5.82319	7.2009	7.7668	6.71013	3.89288	5.11645	4.66142	2.35965	2.44332	3.33947	8.00304	7.55957	7.76417	0.277465	0.303682	0.209872	24.0222	22.0176	21.8631	8.39523	9.72851	9.76406	11.6563	11.4258	14.4806	19.4171	19.0971	13.9311	7.14764	10.68	9.37321
ABCA7	1.13335	1.83354	1.15986	0.984027	0.709606	1.68155	0.612443	1.92036	1.33642	1.93297	1.07982	0.772656	0.808345	0.838004	0.811316	2.9816	1.44027	1.86431	0.477098	0.466847	0.247205	1.745	1.46255	0.640561	0.646625	0.974044	0.612645	2.25604	2.04426	4.23906	1.69417	2.40138	2.19079	1.25134	1.4752	0.546712	1.22622	0.560162	0.407275	1.81331	0.775931	1.4596	0.963088	0.953257	1.32329	0.919285	0.962469	1.48246
ABCB10	11.2133	9.70188	8.52889	8.31732	5.55111	6.54443	12.1057	13.1989	12.9676	5.66734	6.01494	5.64328	12.4764	11.4709	11.6424	6.17138	6.49032	6.64634	30.8129	32.0865	29.8748	14.7858	12.908	13.9671	21.655	18.8677	16.9335	14.7783	14.1033	11.1236	9.4014	11.1779	9.38012	3.9515	4.63755	4.14238	16.6708	19.4727	18.3146	5.64938	6.93301	7.92007	15.9775	16.9906	12.3999	8.71414	6.98453	6.18322
ABCB6	11.4668	12.4597	9.19859	6.81231	7.29716	6.29253	17.4778	17.9524	19.893	5.17149	3.57141	3.39294	5.47363	4.48858	5.07034	9.72323	7.87261	11.6329	13.4138	16.2758	13.0498	3.93699	4.03923	3.48593	4.68717	3.84567	3.38248	11.7317	12.3647	11.2177	10.2312	8.1737	8.66044	6.06666	5.74771	6.00531	22.4143	21.127	19.6785	15.1777	18.2588	13.0638	1.53269	1.69692	2.46332	11.1953	9.52545	11.415
ABCB7	9.33001	7.19527	7.19639	11.2361	9.23277	9.29391	13.4502	13.6432	13.9397	22.0578	20.5598	24.1486	28.879	27.7806	24.015	6.00633	5.07291	5.61378	12.5595	10.9889	11.5308	10.7228	10.7388	11.8346	13.7037	12.5986	12.0583	17.073	15.2614	14.6537	12.0781	12.5989	9.62717	8.65501	11.3876	11.2919	9.01188	8.65557	9.82267	11.464	15.179	15.6083	8.56363	6.14939	7.20737	10.9602	10.2662	8.80646
ABCB8	2.08176	6.26018	7.09756	2.20026	7.4997	9.19184	5.08767	9.42745	8.52297	10.7019	9.13828	7.0535	4.6853	3.76751	2.83304	6.11729	4.31335	3.43618	12.0686	9.40191	4.54642	4.91952	2.42137	1.7136	4.69266	2.27412	5.5974	2.17521	1.11808	3.35742	11.389	8.96875	10.2742	7.91793	4.82847	4.32799	6.53501	3.0312	1.69139	17.7812	6.6302	7.44058	0.935847	0.484079	2.15873	2.30276	5.01266	5.90865
ABCB9	1.48016	2.41841	3.2412	1.2029	1.51554	1.9355	2.11938	2.54119	1.38783	8.10264	8.18932	7.28437	2.57508	2.08599	1.57708	6.93611	5.57483	5.73776	2.286	2.06208	1.10087	1.94172	1.52558	1.2572	3.30585	0.316173	1.42203	3.36097	3.36814	4.71047	1.73626	2.67731	1.61882	3.67355	3.25169	2.00668	4.80484	3.66199	1.89704	4.91675	2.57939	2.21382	1.33525	1.43814	1.55272	1.58179	1.84811	1.65182
ABCC1	3.5974	3.53254	4.72368	8.58099	10.8839	9.39555	12.1123	12.5184	11.4723	5.0228	5.78025	5.70119	36.5109	25.993	27.7422	5.58463	4.78548	5.53635	15.2592	15.3663	11.8809	9.93101	10.5721	8.07807	8.33777	5.77833	7.19378	11.3854	10.7401	11.6032	9.84023	10.4448	11.8483	12.9813	10.6272	7.032	11.8976	11.0984	7.73698	20.1638	17.0517	14.4192	9.74299	8.76197	10.8016	5.33714	6.22244	4.36379
ABCC10	1.38204	3.31439	5.99274	1.89846	3.86252	4.09762	5.38503	6.54069	3.76462	5.88796	4.53155	4.31943	2.72602	2.52919	3.35984	4.14735	3.91741	1.70695	2.84888	2.5839	2.118	8.12443	6.26604	4.41731	5.71084	3.33132	6.63902	2.50796	1.11995	1.97896	3.51305	3.15003	3.91741	3.72188	3.21778	2.797	3.0897	3.04637	1.19818	6.49467	3.04053	3.55829	8.38328	4.03137	4.52823	2.29728	2.6515	2.99499
ABCC11	0.274967	0.0768826	0.0897723		0.0924055		0.0256562	0.0112505	0.12065		0.117864				0.0265236	4.99357	5.22372	5.7972	0.0314269	0.227574		1.85354	0.871317	0.903398	0.0978804	0.0740085	0.0647579	0.29009	0.446493	0.247359	0.56831	0.27367	0.535969	0.12501	0.0419597	0.00906161	0.213626	0.762367	0.0235473	3.22397	2.71778	3.0079	0.0139697		0.0555918	35.667	35.3351	20.6759
ABCC2	9.06628	7.71228	7.72049	0.908858	0.402737	0.584222	0.224477	0.186119	0.15434	0.301691	0.227271	0.500924	0.046403		0.109018	0.339633	0.459198	1.15003	0.672768	0.670507	0.622897	1.04011	1.38365	1.191	2.73595	2.33802	2.28981	0.0501756	0.0414187	0.0632104	0.0904576	0.119816	0.00702345	0.406462	0.272795	2.25801	0.740812	0.792509	0.772507	1.81647	2.47891	1.97829	0.430237	0.653384	0.23436	0.369397	0.516482	0.15901
ABCC3	4.96618	7.38952	3.2088	9.03747	11.036	11.425	3.07257	1.98694	1.70813	4.82725	5.08842	4.27648	1.56081	2.64407	1.11968	5.42006	4.05771	3.76295	5.04667	4.41916	3.23941	19.7279	12.5696	14.4536	0.799189	0.933824	0.250719	34.9953	41.9502	41.7266	10.5748	9.81532	14.1179	11.1617	6.38398	7.20607	5.92237	6.89526	4.21078	13.6479	12.8508	10.3364	13.3206	11.4416	14.3689	1.58219	1.00951	2.46901
ABCC4	0.0802963	0.082632	0.120168	13.1881	11.1115	11.4708	18.4335	17.3738	17.9695	11.4802	9.95516	12.6128		0.136013	0.00814606	0.0201994	0.168166		16.7009	14.7913	14.3501	2.21685	1.93156	1.87435	3.59559	2.87851	3.85211	5.44956	4.95059	4.87368	0.148031	0.703126	0.17528	1.15004	1.25416	0.929522	28.0094	33.108	30.2162	0.979332	1.29227	1.21069	15.9129	15.7688	15.7437	0.611448	0.0826253
ABCC5	19.088	13.4327	15.1436	4.47311	4.29239	3.87106	9.97706	7.08964	7.06555	9.73052	9.31534	7.10501	5.75286	5.54026	4.87931	36.4183	38.5665	39.0466	17.6634	17.4842	16.9017	22.1264	20.6734	20.8487	12.2347	14.9068	11.5002	8.72502	7.62538	8.71173	20.0956	22.1523	19.1668	19.0658	17.5198	14.0092	8.57941	6.8287	7.91093	32.5462	32.9078	29.1707	9.44151	6.69875	6.06701	9.36104	10.5008	7.54961
ABCC6	0.422329			0.394025	0.274007	0.0638052	1.99096	2.37635	2.50139				0.620086	1.27905	0.452008	1.0718	0.552791	0.545766	1.71774	1.94479	2.0953	0.405645	0.500068	0.106966	0.335093	0.8494	0.0633427	1.11694	3.06218	2.8147	0.999294	1.823	1.77377	0.0122708	0.009599	0.598883	0.113895	0.306748	0.320878	2.9616	3.01525	2.4324			0.039912	8.12903	7.64536	7.80114
ABCC6P2	0.167759		0.145189	0.150585	0.228776	0.0773307	2.65113	2.29635	1.78161		0.0807581		0.537069		0.0955788	1.1418	0.799686	0.874326	1.02119	0.424619	0.291762	0.907094	1.00922	0.745849				1.42798	2.04565	0.865929	0.0341611	0.232296	0.037737		0.475635	0.208036	0.301288	0.699543		0.560604	0.680018	0.312968		0.152371	0.0396559	3.62019	3.655	5.3582
ABCD1	0.46657	2.49512	2.4671	0.714595	2.72645	2.5103	1.3116	1.02877	0.51764	1.00254	0.816695	1.00693	0.96674	1.07807	1.14706	0.49821	0.496714	0.51395	2.05689	1.29486	0.913	0.677545	0.140941	0.227473	0.45745	0.351546	0.72034	0.91488	1.41894	3.2202	2.13853	2.05185	2.95571	0.74735	0.598965	0.266321	2.50538	1.96378	0.291455	6.3465	2.03517	2.64844	0.284961	0.90372	1.32184	0.117438	0.598205	0.0785475
ABCD3	53.9334	45.9973	40.1332	34.9891	25.1582	24.798	52.0029	51.552	48.6456	23.6517	22.4368	26.1411	28.6505	31.5805	28.303	26.2936	26.2634	28.337	49.4217	47.103	49.9985	88.5263	96.6613	101.775	54.4042	54.2783	46.3231	67.4033	67.5838	55.5083	87.084	84.1411	78.2005	13.6975	14.204	15.5287	39.5776	42.3316	52.4196	22.9669	25.8255	26.8173	30.4025	22.8903	26.2652	27.2858	29.233	25.1921
ABCD4	5.75975	5.68326	3.91908	4.05511	4.56568	5.84423	7.31004	11.0223	8.203	8.82272	11.1769	10.1838	10.5067	7.26836	7.96125	4.85602	4.81742	3.86536	3.71109	3.36483	2.35147	11.477	8.42714	5.68293	6.66756	3.72859	6.82401	8.83632	6.94979	10.4109	5.12925	4.66481	3.83769	11.6213	8.99076	7.30191	20.2843	13.1154	10.1737	5.64977	6.93239	3.61621	5.43985	5.44017	6.09778	11.7601	14.6538	10.0345
ABCE1	83.8638	73.5702	67.9699	90.5408	64.1785	63.2988	88.8548	65.8056	79.1885	43.1827	51.2093	53.4404	51.8733	48.0234	45.1403	27.9912	28.8426	31.652	60.7667	62.7329	60.966	155.646	148.282	166.971	76.1975	74.8918	62.2604	63.1439	55.6083	45.8113	42.6499	38.925	32.2719	29.1266	28.8884	31.2676	61.6082	69.9849	74.6869	34.2923	39.8331	42.4862	26.2023	21.2215	25.8585	54.2403	48.1718	37.4137
ABCF2	71.8573	67.7659	58.0131	59.5648	57.9384	52.8711	38.8053	40.3964	35.6715	40.9065	40.9787	44.259	30.4076	29.9361	24.6789	13.2897	13.1867	17.6242	68.6266	72.3639	71.0463	31.693	24.8236	22.3762	58.6526	49.17	51.2693	18.1939	19.3468	17.6442	28.9794	27.804	23.9845	16.2112	16.8537	16.5022	25.8534	30.7084	28.0803	34.4666	36.9059	34.061	21.1656	18.0858	20.1947	19.6315	18.4788	17.6568
ABCF3	9.44007	15.7945	14.7158	8.87508	11.487	13.5681	12.4056	16.1484	11.861	18.6956	15.8155	16.3745	15.6779	13.6543	11.209	27.9721	19.6423	19.4321	18.2291	19.0478	20.1922	39.7987	29.087	20.7505	21.4044	14.3964	22.6536	14.7845	17.6742	21.1423	21.7481	21.9746	21.8633	20.5972	17.2726	12.2192	13.9039	14.2248	9.22503	32.8366	27.8913	21.9984	11.2925	6.14432	10.7638	29.2033	29.6525	26.5534
ABCG1	0.0830528	0.100119	0.0377078			0.0978353			0.0448711	0.757266	0.343921	0.714114	0.219911	0.176331	0.100528	9.14999	8.52883	10.5376	0.0646286		0.0276447	0.818219	1.14592	0.833691	0.163652	0.060264	0.118266	0.105297	0.104582	0.113341	0.918428	1.19216	0.937613	3.64741	4.04894	3.32263	0.155353	0.217467	0.0554481	4.65795	4.06701	3.69825	0.32555	0.403369	0.525777	0.608636	0.600178	0.505569
ABCG2	13.9371	14.9677	9.75967	5.07481	3.33426	2.21734	6.94649	6.16217	9.08898	0.843673	0.470765	0.337428	0.0291784	0.174361	0.13659	0.0273657	0.0465579	0.0648275	0.0415073	0.0277184		14.3232	13.1192	12.1763	7.9957	4.47202	3.20427	0.464746	0.0991551	0.109254	1.15356	0.195346	0.0672442	4.19851	4.33587	6.95955	2.88954	2.26738	4.6809	0.605009	0.616703	0.507189	0.311097	0.388105	0.227925	0.721753	0.16082	0.190285
ABHD10	32.0832	22.6251	23.8931	17.188	14.5394	13.2935	17.5332	14.726	15.9469	18.4822	21.1624	21.337	7.50967	6.95768	6.733	13.9839	14.4091	14.698	30.6007	25.2368	30.0924	28.5682	28.8417	32.0988	18.0294	18.9245	15.7717	8.6397	9.32888	7.44812	17.6707	19.0014	17.8491	9.12589	10.0617	9.72143	12.2673	13.7576	15.1585	7.15293	10.2294	9.86852	11.7209	7.9189	10.3781	22.1579	19.1072	17.1616
ABHD11	1.3581	2.39995	3.14863	1.66781	3.30663	3.58271	4.67141	6.9417	5.80235	7.33095	5.65345	5.20105	4.15057	3.84326	2.78456	10.0227	8.11145	6.2837	5.5214	7.1534	3.61658	5.8349	4.10655	3.06914	7.76545	6.85745	10.1182	1.89824	1.99427	3.15572	9.92295	8.86065	9.2966	12.6598	13.8925	9.29335	4.41331	3.63237	1.72917	29.4034	17.0709	17.0664	0.717605	0.80747	1.79395	7.5283	10.0374	8.95195
ABHD12	6.35336	7.05808	7.0337	24.4958	18.2188	21.5506	21.3455	20.8391	23.4211	25.3289	20.884	20.4835	18.1867	19.0361	17.0605	19.0704	15.7531	19.9513	37.1716	37.9738	36.8937	23.6613	22.5725	17.1531	6.49362	7.65961	7.82908	29.9808	28.8991	29.5036	30.433	23.3747	22.47	23.0418	24.7795	21.4744	16.9948	17.7309	13.1506	32.5844	29.8329	27.5164	12.2147	10.0329	14.0931	26.7868	26.0375	21.0724
ABHD13	4.94978	4.20698	4.71766	5.11952	3.93247	4.40887	5.96214	5.2415	5.33753	7.82663	7.22534	8.8044	4.37799	3.98623	5.80693	2.83602	2.75585	3.34209	2.00109	2.28826	2.0489	3.85505	5.18493	5.30303	1.45168	1.47338	0.903427	3.35362	3.60562	2.52336	2.87819	2.88892	3.07454	2.5655	2.58932	2.2667	6.32187	6.90881	7.72184	3.72478	4.34169	5.17131	3.90766	3.33121	3.35899	4.7634	5.83452	5.22932
ABHD14A	0.13993	0.571389	0.591374	2.72214	3.40134	4.14894	5.35004	7.64768	6.46574	4.37395	2.44917	3.72195	2.60528	1.67709	2.216	1.10556	1.11554	3.00721	3.40473	2.24334	1.06927	5.18213	3.05636	0.889592	0.152119	3.53892e-121		3.23208	3.90168	3.70182	3.29641	3.61154	4.24931	2.31547	2.26961	1.34592	3.17202	2.51837	1.82209	1.67645	1.45775	0.995087	0.154381	0.0438758	0.872338	1.54107	1.42046	0.941091
ABHD14A-ACY1	0.13576	0.729885	0.279288	0.121947	0.118867	0.239424	1.91049e-16	0.257524	0.174756	0.266718	0.280932	0.427272	0.237665	1.28011e-86	0.0691526	0.391005	0.172385	5.6489e-05	0.715632	7.1731e-15	0.417321	0.26138	0.446545	0.225811	0.0902528	0.306144	0.329464	0.0532246	0.424257	0.360955	0.225075	0.0899096	1.01264e-24	0.29436	0.195653	0.218025	6.92336e-45	0.170566	4.83452e-46	0.0702152	2.92916e-11	1.80212e-73	0.543473	0.120286	0.278989	0.471592	0.897564	0.341223
ABHD14B	2.71526	4.57625	4.27409	5.52615	7.8424	8.30553	8.49038	9.68905	8.924	9.79519	8.60323	8.0244	1.5881	1.4462	1.25572	12.0403	10.1718	9.35497	3.99716	4.04963	4.21543	17.3546	14.1992	10.8671	6.16638	5.43558	9.81682	4.89157	5.96956	6.99772	11.5617	11.5957	12.4814	3.5058	4.47405	2.50726	9.01217	8.7059	4.97972	13.7298	10.6437	9.44522	3.82646	3.46612	6.1049	23.5348	30.8374	27.8179
ABHD15	2.40043	2.5793	2.57291	1.9419	2.56986	1.87783	3.9941	4.73795	3.93191	1.95856	1.50947	2.04336	1.80504	1.26016	1.13029	0.307793	0.33652	0.301198	1.47054	1.42491	1.3204	3.9798	3.58927	3.10414	1.62633	1.35747	1.53281	4.02151	4.66343	3.69644	2.44502	2.61729	2.40313	2.41364	2.91344	2.38159	2.2558	2.59247	2.52656	2.07723	2.07096	1.95035	1.78874	2.14574	2.41815	3.31643	3.33515	3.08892
ABHD17A	0.0332395	0.340732	0.564938	0.0704337	1.05632	1.43134	0.346589	0.997952	0.493034	1.0357	0.815599	0.665946	1.2153	0.613722	0.371231	1.45832	0.917266	0.483434	0.152523	0.188151	0.093874	0.408001	0.22412	0.0442012	0.0928912	0.136713	0.39103	0.216617	0.341729	0.319656	0.229031	0.591626	0.724598	0.551544	0.385421	0.124866	0.939937	0.227251	0.0204813	1.20495	0.235323	0.211324	0.171163	0.0597706	0.338763	0.392668	0.731986	0.745173
ABHD17AP1	0.0279202	0.124164	0.296364	0.0461602	0.62479	0.949905	0.377088	0.705125	0.61106	1.15575	0.42926	0.3598	0.764045	0.341182	0.320325	0.96166	0.51107	0.124564	0.128097	0.0544995		0.353772	0.0379427	0.0401705	0.0375048	0.083159	0.27395	0.0640995	0.102203	0.455605	0.580955	0.355166	0.65468	0.310616	0.470394	0.092626	0.660075	0.090723	0.0135342	0.300026	0.0200064	0.138508			0.0451396	0.144052	0.423326	0.681165
ABHD17AP2	0.0559265	0.248704	0.593601	0.0924617	1.25143	1.9026	0.755309	1.41234	1.22391	2.31496	0.859793	0.720658	1.53035	0.68336	0.641592	1.92616	1.02363	0.249491	0.256568	0.109159		0.708601	0.0759975	0.0804618	0.0751229	0.166567	0.548712	0.128388	0.204705	0.912535	1.1636	0.711383	1.31127	0.62215	0.942157	0.185521	1.32211	0.181724	0.0271086	0.600939	0.0400719	0.277421			0.0904112	0.288526	0.847875	1.36431
ABHD17B	10.9336	10.5149	6.93369	15.1129	11.1264	10.6433	14.9786	14.3638	13.9954	6.37347	5.54501	6.47286	14.4899	16.0283	14.7259	6.19792	5.86132	7.37845	15.3509	16.4019	14.3361	10.1611	10.1891	11.6684	18.2317	19.7023	13.9108	11.3993	11.0276	9.03368	10.4393	9.64335	8.49371	11.2869	11.6641	13.4898	9.24706	10.2196	12.9968	6.58459	8.46685	7.63919	7.8969	6.72583	8.71227	4.47774	4.12727	3.81573
ABHD17C	13.1308	12.0508	10.6529	1.51332	1.69585	0.85155	4.86995	4.16842	5.74344	4.53371	5.40637	4.82371	4.83835	6.21812	4.79862	10.7994	10.934	12.3728	3.70232	5.30378	8.10249	10.748	9.54471	11.8097	15.4658	15.0439	14.7488	3.06411	3.14504	2.57363	6.99706	6.42996	7.83671	7.53025	6.92418	7.60574	2.90602	2.35018	1.11278	8.44498	9.8825	10.6548	3.83636	2.74631	4.2008	2.68431	4.31144	4.69967
ABHD2	35.4742	39.7798	31.0918	13.2034	13.4468	15.7397	23.3143	17.1683	20.0611	44.473	40.6318	31.2238	20.9986	19.2883	18.301	15.465	13.55	16.8058	29.5585	32.3674	33.0345	12.4183	14.8186	7.98282	29.9317	21.085	23.4067	29.6653	26.0886	26.5443	26.7301	27.1287	22.173	73.7457	74.8867	69.406	48.6437	51.4384	41.2486	18.8043	21.1018	14.4203	17.4244	14.3321	17.7391	19.3319	25.3168	17.8701
ABHD3	13.1004	10.9618	8.60248	9.83911	8.21745	7.1822	9.04299	7.59801	9.08808	14.7735	14.6218	15.5608	10.1102	7.86761	9.20723	11.2273	12.2138	13.8422	17.0581	10.2292	11.3252	25.4239	23.18	29.6378	21.8092	25.6848	18.3792	28.1722	24.5258	20.6959	10.7203	11.5926	10.1855	7.14464	5.48129	6.74636	16.5326	19.1968	21.193	10.635	11.1097	8.36848	8.67541	10.5993	9.47314	7.1255	6.73317	5.12009
ABHD4	19.2942	22.7073	20.2277	3.21879	3.98292	3.09923	7.47076	7.026	7.29628	2.67549	3.90614	3.24319	14.4381	5.00382	6.36521	9.43683	7.92529	10.5435	1.36661	2.44754	2.83775	9.14439	10.4089	8.1632	10.4766	7.98345	7.02529	4.89362	4.70293	4.7037	8.08309	7.28856	8.44376	7.02334	6.18598	5.43923	5.21871	5.9614	4.33638	8.94909	8.68978	7.25935	0.955136	1.11803	0.656081	2.05965	2.61008	1.26446
ABHD5	21.7821	18.5504	18.8992	12.5463	8.08022	8.81888	7.18511	10.9643	11.0815	13.5072	11.1141	13.2911	8.61516	8.90074	8.3623	8.02332	8.18491	7.52692	4.30739	4.41203	3.29401	14.6023	12.1687	14.66	21.7978	22.8509	19.1328	9.98017	9.97969	6.91521	11.5659	11.5213	10.2395	6.05808	6.66976	5.95151	4.7445	5.23625	6.67067	7.69475	7.69613	8.19418	11.4326	8.54773	8.76563	19.5999	17.5221	14.555
ABHD6	6.59277	5.01567	4.44674	5.61152	4.36164	5.24727	2.76788	2.18457	2.06289	2.58219	2.15636	2.01034	1.86377	2.253	2.13673	2.1402	2.67024	2.74762	1.7683	2.45514	2.06239	3.38393	3.26373	2.89341	2.98257	2.82629	2.22097	2.57328	1.92151	2.1617	4.03699	4.59746	3.57484	0.362602	0.450584	0.292497	1.54739	1.74452	1.74002	1.41818	1.82803	1.55706	1.41479	0.981991	1.00324	1.46862	1.18378	0.920185
ABHD8	0.983967	3.73066	5.13588	0.418987	2.06251	2.56827	1.27989	2.52544	2.15699	0.591884	0.565694	0.548269	3.11267	1.29207	1.64331	1.89931	0.753697	0.7695	0.0190717			2.29193	1.36555	0.646533	0.0546551	0.0174257	0.189716	0.113947	0.15194	0.586042	3.45801	2.274	4.84236	0.257185	0.263302	0.570414	0.244877	0.0747505	0.0199882	0.295573	0.0591679		0.02045	0.0581477	0.322319	0.622074	1.44156	1.01855
ABI1	60.3481	54.099	43.0866	31.2231	23.3429	26.1769	20.4412	19.2519	19.0986	47.4007	50.0232	50.5693	22.5603	25.0924	23.4474	12.9044	13.0574	18.3249	50.3083	50.6666	51.2958	39.266	38.6829	35.5267	27.6231	27.446	24.0112	50.2277	46.1558	38.7833	55.6847	53.1066	49.0551	17.1933	17.9565	18.2911	13.2721	16.556	18.4158	10.4737	11.9999	12.2687	20.6878	13.965	16.9587	17.7319	19.4388	15.4299
ABI2	43.0724	46.4964	34.1103	16.6859	17.2856	12.8087	34.7411	37.7067	34.7291	19.9105	15.4605	14.4026	18.2453	19.6216	15.8652	8.76259	7.74582	9.13169	23.2958	23.3179	25.729	52.3218	47.1674	52.3999	9.35199	7.27487	11.3189	31.7916	28.2375	20.9258	15.1528	14.257	15.3963	26.5753	19.8582	23.7147	39.6647	38.3723	39.7902	10.9071	11.5654	12.0591	10.3864	9.27299	7.94421	12.5669	14.2786	9.5866
ABL1	20.953	18.7166	15.4796	25.5594	33.8523	28.5359	18.8002	20.382	17.7691	9.34027	12.5084	12.3267	21.2466	23.2109	20.4199	9.94559	8.22365	7.87188	12.7021	13.9493	11.4485	14.262	12.9783	13.5543	17.6822	20.685	16.1207	14.9489	16.0856	18.9001	14.2693	14.1504	13.057	13.0606	11.2183	12.7356	14.0388	14.9107	12.4491	10.2773	11.1441	11.0769	13.4318	9.95587	10.0966	17.6251	14.5594	11.0366
ABL2	21.8277	15.6798	17.7068	55.9114	41.8206	36.6038	7.58709	7.07524	6.14177	15.864	18.1905	13.8647	9.09962	9.08362	9.40717	4.45069	5.04979	6.21222	8.16275	10.9318	9.53346	13.995	12.2426	12.5073	18.868	16.4856	16.2792	11.3108	8.61381	9.3785	8.58064	8.23956	8.91298	5.56439	5.6119	5.09129	17.5078	22.3632	20.6725	7.52793	9.55511	7.96223	14.9347	10.0446	9.63017	5.19678	4.90336	4.57264
ABLIM1	7.79478	5.7042	6.12854	8.86411	8.6587	7.46007	65.07	53.2775	68.8344	25.9689	26.6875	27.7566	58.1035	67.7882	59.6314	21.1774	27.8946	29.0738	15.1375	13.2027	11.1598	28.754	30.6598	30.2087	41.8704	37.3996	34.3618	13.1667	11.522	13.9538	44.0514	43.5126	40.3463	4.71669	7.66333	5.07087	1.98707	1.34101	1.39458	29.0469	35.131	37.7203	10.156	6.84553	9.07132	22.3869	18.105	14.0534
ABLIM2		0.0233778	0.0363293	0.111315	0.0231049	0.0504574	0.0446412		0.027749	2.38621	2.70605	1.96353	2.29957	1.58358	1.69767	0.0651623	0.0786216		0.594555	0.663943	0.245686	0.64652	0.689722	0.270125	0.588468	0.461531	0.35091	0.11756	0.473942	0.0905469	1.2528	2.12218	2.00023	1.5973	1.61208	0.84576	0.0370156			0.0543848			0.581982	0.50798	0.890791			2.03454
ABLIM3	1.40988	2.01476	2.00593	0.0679126		0.0142906				1.61326	1.85207	1.73382	0.134175	0.162656	0.135754	0.0902569	0.0799944	0.0664449	0.107158	0.355707	0.0498663	11.6909	8.64517	6.33814	2.11472	2.19424	3.23465	4.76253	4.79797	4.51845	4.43573	3.56483	4.23231	3.35344	2.86732	3.44827	3.19384	3.28213	2.2188	0.500591	1.0138	0.349643	4.75139	2.37295	3.7588	0.182357	0.301674	0.581657
ABR	11.8859	16.8193	13.6747	9.16669	12.4881	11.0246	6.54015	6.59409	6.37327	27.2059	25.3899	18.6815	12.0732	12.7196	10.9676	13.3146	11.8943	12.4084	4.9025	6.77973	8.53645	11.7242	8.93876	7.53963	4.67195	3.80543	5.7324	10.0133	9.05844	11.1728	4.08806	3.36389	4.28838	23.0815	19.7293	14.2966	13.9289	14.2522	10.8969	3.21862	3.33421	5.45528	5.57014	6.26109	7.12177	6.51162	8.6561	5.61547
ABRACL	32.1621	33.5848	37.9155	102.034	89.3491	89.3143	22.9618	23.0465	20.2528	60.8533	59.0121	61.5602	55.5562	68.0167	66.4599	23.1207	19.251	21.6088	9.89272	10.028	8.38437	86.89	84.145	79.7372	73.1322	69.2754	64.6995	63.9004	63.1986	61.7176	61.2573	70.9388	56.2128	28.8911	30.7546	38.1618	7.71141	12.1286	7.97905	28.6203	28.0652	28.652	47.0062	32.8507	45.8258	25.1812	19.9451	17.0553
ABT1	1.88592	2.93064	2.77529	3.25569	5.442	6.48585	4.18558	6.40395	5.02815	3.49882	2.54833	2.49107	8.33255	5.97785	6.9963	6.209	4.47733	3.38257	2.9318	2.1346	1.65908	6.6595	4.95132	4.65309	4.29263	4.55462	5.6566	2.86643	3.45973	4.38302	4.4966	2.8173	4.09058	4.90449	5.0009	3.29187	4.97649	3.14234	2.31048	2.82789	1.55614	1.5369	2.31739	2.12575	2.8101	3.02364	5.02675	4.47459
ABTB1	0.271372	0.351082	0.519843	0.0541222	0.577056	0.75226	2.38561	2.45198	1.67456	1.77562	4.10638	2.51682	0.501795	0.55032	0.686454	0.711978	0.731077	0.591948	2.87879	1.94177	0.428714	0.548124	0.613702	0.288754	0.551635	0.478302	0.480892	0.321713	0.753137	0.26544	1.2371	2.60031	2.76694	6.42745	4.19876	2.82058	2.3016	0.723859	0.3796	3.65585	2.61789	2.08396	1.70222	0.755461	0.738768	0.310019	0.89016	1.39199
ABTB2	2.23266	3.31353	3.26851	1.18501	1.38128	1.76726	2.50169	2.71617	2.44391	3.32045	3.54244	2.73522	2.20114	1.38132	2.23366	1.14962	1.0769	1.24292	2.40404	2.10856	1.6142	1.43082	0.740296	0.984268	2.14461	2.05261	2.7609	1.27114	1.61322	1.4975	0.470557	0.448546	0.774794	2.39897	1.8951	1.58928	1.05524	0.506704	0.771649	5.97586	4.16233	3.30325	2.63205	2.5531	4.36425	0.632644	1.03255	0.573234
AC000041.8	27.1817	3.06759	14.8244	5.193			3.74418e-296	9.13499		45.7165		7.8144	12.6597	9.19439		4.51272	18.7501	26.4734	14.2035	19.2832	16.8159	4.09127	9.33923	22.7342	40.3172	56.6523	37.5428	9.01332	10.8986	2.79251e-299	20.6919	6.0445	20.3597	9.32292		30.1251	27.3023	28.3093	12.8796	7.25037	45.4315	19.6086	5.95716		3.24331e-22	5.18175e-213	26.145	21.1859
AC000068.5	0.600102	0.090203	0.473396	0.10888	0.021182		0.39375	0.286354	0.236371	0.526446	0.523287	0.229047	0.212386	0.232114	0.144448	0.298747	0.263809	0.766587	0.72198	0.443323	0.48605	2.15218	1.65852	1.58087	0.617049	0.347183	0.68038	0.945949	1.09739	0.821681	0.452365	0.987462	0.711115	0.146404	0.403548	0.148422	0.281475	0.260618	0.477891	0.21032	0.294715	0.297527	1.12048	0.714439	0.822813	0.54225	0.474315	0.531513
AC000089.3	5.75877	6.2119	3.68555	2.93795	3.84251	3.53845	2.95401	2.32204	3.23687	4.33115	3.34396	2.87542	4.37571	4.44367	2.14504	1.64708	2.24254	2.89901	2.44767	2.74166	1.91247	5.67735	2.67458	4.44934	3.87911	3.02442	2.8446	1.21125	1.11022	2.70353	1.65274	2.94653	1.31324	3.12242	5.6514	3.99111	2.56704	3.77795	2.88618	2.24005	3.78309	1.17337	2.6404	1.06594	1.61355	6.08392	4.32146	3.81707
AC000110.1	1.81717	2.41712	2.03862	0.756603	1.55675	0.540894	0.108111	1.03964	0.711053	0.243248	0.34133	1.8648	0.357497	0.348167	0.267808	1.56276	0.784017	0.443619	1.88474	0.671386	0.482327	1.2827	1.25438	1.80329	1.908	4.18225	2.33902	0.528367	0.209343	0.118338	1.04679	2.39583	0.735858	0.92467	1.32523	2.78069	1.06156	1.56764	0.448506	1.3009	1.10277	0.819858	1.47657		1.88428	1.29082	2.351	1.84234
AC000120.7	0.122344	0.195763	0.284138	0.101826	0.456565	0.26724	0.296254	0.400308	0.33006	0.062239	0.180585	1.22792e-85	0.672279	0.42972	0.161611	0.333277	0.734254	0.707364	0.540013	0.532837	1.49967e-128	0.171214	0.0450101	9.91114e-223	0.402136	0.136403	0.654876	0.254887	0.283755	0.0953507	0.185607	0.328298	0.427789	0.55888	0.43525	0.440307	0.588336	0.748791	0.255965	0.75131	0.632978	0.901183	0.63803	0.839678	1.28247	0.110876	0.247645	0.121209
AC002056.3	6.95547	5.61997	6.30918	5.92564	3.53527	6.33671	8.6241	8.52165	10.6751	7.53217	7.56731	8.61316	5.31329	3.76493	6.25494	10.56	11.6094	13.1347	9.37548	9.0335	10.8322	8.15331	7.00895	8.73314	11.9762	12.5514	10.7503	2.61878	3.11868	2.99687	4.45613	8.52923	6.25574	8.09413	5.89228	7.69689	5.13711	6.84546	6.62569	6.57399	6.13623	3.30298	6.07875	4.01232	3.91254	6.04634	5.35435	5.23054
AC002116.7	0.101207	1.41548	1.12371	0.181179	0.81093	0.275751	0.0911708	1.46693	0.503845	1.02537		0.583138	0.10101	0.197466	0.682109	1.23025	0.666551	0.377442	0.0890456			0.722462	0.886096	0.0950364	0.267521	0.0840631	1.80172	0.0896483	0.177919	2.01537	0.405207	1.01498	0.447625	1.04498	1.41061	0.888216	0.898421	0.0936752		0.300601	0.0934672				0.848044	0.182701	1.51987	0.560827
AC002116.8	7.16145e-17	3.25956e-38	4.95457e-78	1.53304e-49	1.01906e-09	2.95274e-21	2.88622e-41	5.30556e-107	2.69273e-36	3.86673e-12	7.77299e-20	3.55466e-28	5.52762e-08	1.05137e-35	1.72239e-11	1.09681e-40	3.63088e-56	1.562e-07	9.19011e-25	1.96964e-28	3.0785e-20	2.65842e-09	1.1313e-16	8.07283e-21	5.99986e-30	1.00185e-154	5.58471e-42	4.65257e-27	3.15014e-37	1.43079e-22	6.46164e-23	3.68885e-67	3.19243e-05	5.46736e-20	2.45579e-36	1.25362e-61	2.25485e-31	8.45368e-07	7.44251e-20	0.0659343	3.07979e-42	5.11406e-113	3.50486e-78		6.41026e-43	8.87326e-18	5.12404e-41	6.25686e-34
AC002310.12	0.531167	0.448897	0.853229	1.18826	0.623691	0.452897	0.613561	0.348626	0.59763	1.24318	1.28398	1.33555	0.407294	0.814823	0.335124	0.246661	0.658203	0.311582	1.37962	0.903678	0.920522	3.3683	3.98156	3.51731	1.04457	0.700641	0.556163	0.911626	1.3754	1.86923	2.33647	3.02306	1.83932	1.33184	1.70585	2.10776	0.55256	0.871662	0.433906	0.456011	0.54759	0.656676	1.60746	1.93903	2.19559	0.928405	0.873267	0.596384
AC002398.9	9.2905e-43	6.24864e-72	1.65713e-22	0.497544	2.29088e-14	4.04917e-15	1.845e-33	4.05969e-14	2.78608e-11	8.33222e-27	0.48208	3.23944e-38	0.226912	1.64186e-23	3.46243e-22	0.853286	4.66256e-23	7.56512e-25	0.104452	3.49829e-33	2.14956e-40	0.250455	5.41858e-75	3.73135e-50	1.39515e-55	9.8987e-58	5.23108e-40	0.384701	0.374575	0.0011876	1.71431e-19	0.145442	1.0295e-10	5.68542e-49	3.3672e-20	0.156893	0.818164	0.103524	9.67842e-57	0.000102263	1.36923e-10	3.2572e-10	4.15567e-100	2.76868e-149	4.37244e-42	3.64444e-52	0.168836	1.38631e-32
AC002467.7	1.26781	1.70529	1.92194	1.74473	1.36923	1.95812	0.52741	2.04974	1.01081	1.16404	0.278787	0.889995	0.38994	0.38142		0.829177	0.370289	0.366429	0.773937	0.61516	0.198484	2.22962	1.93935	0.549749	1.36711	0.648517	0.959124	0.713733		0.521059	1.38782	0.771661	0.520068	2.14877	1.31336	2.78092	2.3943	2.49861	1.75396	0.261267	0.45102	0.258082	1.39571	1.57276	1.73024	0.471397	0.469583	0.433465
AC002985.3	1.84276e-44	3.82824e-223	1.7146e-118		1.22482e-168	1.18261e-74	4.91686e-81	4.90363e-76	2.27453e-19	1.79708e-102	3.70301e-199	2.32579e-106	0.730309	2.0746e-119	0.130989	2.23843e-237	4.79177e-172	3.57707e-79	2.24304e-111	1.40404e-40	2.61619e-44	1.01727e-186	3.1061e-80	4.46893e-52	1.02401e-106	2.58667e-80	1.04129e-49		7.80294e-28	1.20633e-102	0.0825117	7.38903e-243	1.82174e-97		0.383122	7.81425e-219	0.37246	4.29935e-56	1.24465e-62	8.50326e-200	6.89779e-63	1.08249e-131			0.127963	0.537056	1.57215e-99	2.02486e-86
AC003002.6	0.398211	1.06511	0.454214	0.362508	1.40143e-47	0.451543	0.243563	2.86531e-22	0.419837	0.58131	0.460702	0.109862	0.160588	1.39503	1.04711	4.49365e-17	0.601756	0.374639	0.155722	0.142793	1.08382e-05	0.263496	0.712483	1.51122	0.522836	0.107254	0.000175505	0.429193	0.581363	0.132585	2.31223e-12	4.06942e-10	4.51822e-95	0.624243	0.283329	9.01075e-35	0.114076	5.56673e-16	1.9203e-63	5.49894e-51	0.570256	0.118894	2.41316e-46	1.73052e-293	7.60351e-16	0.347001	0.177728	5.09142e-05
AC003006.7	1.7227e-07	1.18865e-14	0.611709	5.06342e-48	1.00559e-16	0.0360838	9.15316e-08	1.31143e-33	2.58205e-14	5.75972e-08	0.262257	8.05756e-15	1.37509	0.91522	5.7288e-11	1.50564e-29	3.09343e-78	2.44257e-07	9.1968e-11	0.0939297	1.45517	5.05075e-14	6.32401e-06	3.26313e-27	1.73368e-13	1.65791e-20	9.29393e-134	7.51204e-05	0.179034	0.00305949	3.18411e-47	1.42967e-178	1.04819e-08	5.30242e-36	4.70228e-34	1.5055e-91	4.49226e-19	8.41201e-25	2.20143e-158	1.35323e-18	1.78293e-128	0.00112445	2.6392e-24	1.11476	1.45712e-148	5.17921e-32	1.77119e-10	0.232734
AC003029.1	1.75724	0.137484	2.27411	0.134628	0.339401	1.01791	0.755995	2.75235	2.45805	6.50006	4.81709	5.80387	1.03508	2.28251e-05	0.95508	2.83333	7.58459e-09	1.32496	1.24365	3.35064	0.311307	6.09829	5.11075	6.49069	1.18126e-18	1.88423	0.731805	1.93154	0.310873	5.11721	4.80396	3.01612	1.99366	2.15506	4.79669	2.88742	0.000136291	2.10854	2.19382	0.000139932	9.85799e-28	8.52584e-08	4.54331	1.41406	2.8356	4.89335	1.07786	1.78673
AC003102.3	0.813961	0.804701	0.549506	0.0268019	0.0472497	0.156187	0.0278102	0.0612615	0.0400802	0.515229	0.493844	0.69666	0.0158083	0.0393734	0.00897035	0.140852	0.142202	0.201918	0.04253	0.095108	0.0907905	0.543673	0.206358	0.169195	0.255289	0.218997	0.0987848	0.352261	0.270893	0.30685		0.0193304	0.0215336	0.424065	0.715709	0.483108	0.146492	0.0558844	0.088881	0.0613674		0.0636525	0.121414	0.15129	0.0603875	0.370962	0.590899	0.64679
AC003104.1	0.219121	0.169138	0.158201	0.311484	0.0653161		0.174974	0.241887	0.393131	0.0935727		0.161907	0.619765	0.0904902	0.693625	0.575976	0.669676	0.345944	0.173743	0.445979			0.0810724	0.0607601	0.738093		0.523363	0.314138	0.404436	0.328521	0.105706	0.238267	0.386746	0.112509	0.0613148	0.271508	0.825195	0.720842	0.986032	3.36962	1.82659	1.51934	0.9298	1.42834	1.2528	0.296216	0.135429	0.102889
AC003665.1	1.09632	0.303973	0.699451	0.850607	1.39664	0.514971	0.779151	0.856713	0.934992	2.92004	1.5528	2.11197	0.0403483	0.234988	0.333736	3.91875	3.17283	2.97057	2.09257	1.67223	1.09617	2.22149	2.259	1.60375	1.57856	1.35555	2.29513	0.755148	1.0019	0.797806	1.79233	1.41488	1.35003	2.39707	2.97696	2.19797	0.677763	1.04521	0.21231	0.078388	0.422668	0.160928	1.20749	0.710806	0.384969	1.33557	1.89708	2.4158
AC004057.1	652.482	997.005	845.74	591.109	622.261	578.348	875.481	986.572	815.223	724.908	566.548	638.701	288.349	365.402	281.412	259.131	266.423	339.348	633.536	604.358	488.396	739.291	608.994	455.539	589.092	496.974	638.523	620.321	634.787	583.683	289.151	290.727	190.832	312.119	430.595	370.652	681.772	828.163	494.07	324.105	311.728	287.317	319.946	245.171	513.116	1387.03	865.61	1246.31
AC004069.2	0.92565	0.236475	1.1575	2.00338	0.883235	1.0574	1.79203	2.39625	2.18764	1.58802	0.673401	1.64047	1.14475	2.32292	1.68395	1.10346	0.973509	2.22767	0.828027	1.29221	1.61308	1.54924	0.974885	1.69266	1.14365	1.94533	1.14054	0.65008	0.781315	1.50897	0.937418	0.619745	1.06479	1.5428	1.12276	1.86018	1.24314	1.37151	1.51063	1.39042	1.54297	2.419	0.702789	0.405731	1.26869	0.739299	0.848796	2.57596
AC004074.3	53.6281	49.6278	44.8335	36.0607	31.4379	29.0418	40.2058	45.2557	51.5766	33.9232	39.6996	41.4685	51.1592	52.813	49.889	32.4957	35.4181	22.2443	62.1937	59.7899	54.4629	103.141	105.641	94.6991	75.0527	71.1429	59.7841	18.0231	19.8285	21.3908	52.93	56.7081	43.6707	41.8396	39.7779	33.3924	75.6644	67.9175	82.2926	36.7018	35.8161	37.0682	50.0098	47.036	42.2927	84.1562	112.37	89.8116
AC004076.9	0.198381	1.59063e-190	4.9957e-132		0.118524	5.35561e-112				4.80023e-105	0.127518	0.430307	0.405953	0.674346	0.602092	1.62615e-70	3.25627e-181		0.304503	3.53311e-299		0.568246	0.153364	1.17408		2.72328e-111	9.1828e-123	0.815394	1.38611e-94	0.225741	1.31169e-118	8.06097e-186	6.17185e-30	7.57404e-120	0.218129	3.94791e-102	1.66659e-168	0.127249	1.68817e-166	2.6531e-145	5.74502e-97	0.341736	0.332393		4.42573e-77	0.272776	0.25208	2.88713e-92
AC004158.2	2.8705	1.36856	4.22189	1.66095	0.47294	0.921549	3.00068	5.11388	2.06912				1.58516	1.68341	1.37322	0.177243	0.418116	0.594559	0.830953	0.435816	0.70545	2.19461	1.94374	3.28926	0.0516985	0.200314	1.28898	0.647099	1.72375	1.13938	0.0550193	0.124114		4.84486	3.44224	3.3571	0.931342	0.671658	0.176393				6.13188	2.61562	1.16716	1.24348	2.96025	0.437181
AC004257.3	0.880056	1.19648	0.854758	3.73557	2.85804	0.90259	2.60745	3.08141	4.11354	6.56029	8.14206	6.43233	3.50185	4.18553	2.05297	1.56192	2.02378	3.07351	0.290724	2.49356	1.6654	2.26291	1.60875	4.62979	0.907581	0.140772	1.48801	0.738048	0.581923	1.63739	2.23723	0.915089	2.03468	0.862621	0.916046	2.56156	4.17832	2.42932	4.39676	0.663388	1.69884	4.0652	0.475593	3.24756	0.308009	0.598994	0.686385	2.17765
AC004381.6	4.96843	4.60275	5.20132	8.07831	8.0252	7.96921	5.69457	6.62596	6.43696	4.86268	5.92894	9.41649	4.97713	5.81245	5.39894	13.6486	17.0139	13.1478	9.42696	9.14535	6.83955	5.87865	7.34596	7.4403	3.72792	3.97346	4.1912	10.2395	10.1448	9.96377	9.73708	6.58274	8.73349	11.2584	11.1685	8.27443	11.4749	9.90939	12.5702	4.07089	9.07804	4.08348	3.34225	1.99142	2.37292	29.108	27.6263	25.6487
AC004453.8	1078.43	856.885	842.256	1235.9	853.186	928.45	596.244	558.795	554.556	676.223	629.397	593.709	499.498	616.555	469.13	229.9	208.327	293.963	306.062	343.168	333.821	1123.94	1237.23	1076.45	909.672	738.983	629.416	653.167	656.359	563.444	319.743	312.324	266.293	740.143	1004.64	819.425	946.308	1279.69	1404.22	233.01	279.592	250.192	385.407	229.06	272.577	1528.12	1125.96	1233.48
AC004463.6	0.109358	0.014028	0.098642	0.07073	0.0328258	0.0603865	0.0582475	0.0633865	0.116206	0.0654305	0.12476	0.204422	0.065768	0.065186		0.154163	0.0156789		0.0440306	0.0779035	0.05114	0.130667	0.201963	0.121287	0.0988105	0.080843	0.131723	0.08783	0.087737	0.200275	0.093996	0.149935	0.0296664	0.085011	0.15574	0.0818125	0.058164	0.0435831	0.0308437	0.0651445	0.0304217	0.0328338	0.110315	0.134241	0.480714	0.164717	0.101542	0.149096
AC004706.1	0.0492896	0.537041	0.205751	0.453653	0.868468	0.468551	0.557647	0.289144	0.515306	0.408876	0.000340311	0.317005	0.150027		0.101953	0.253219	0.114506	0.284488	0.725774	0.164908	1.1209	0.692588	0.368586	3.62876e-05	0.257312	0.442332	2.01722e-06	9.24281e-06	0.293672	3.45382e-06	3.91944e-05	0.519866	2.58874e-05	0.544759	0.43093	0.537931	1.3079	1.01476	0.000207378	0.0594336	0.166553	0.059946	0.546562	4.12073e-05	8.98499e-05	0.0790439	0.335104	0.987237
AC004797.1	190.596	135.47	126.87	161.523	126.074	117.215	116.079	113.549	108.831	74.887	67.4643	74.3083	76.6842	84.1095	69.0743	61.4509	62.2365	71.631	118.414	105.339	120.019	224.308	231.602	235.909	227.286	221.981	164.238	110.196	112.777	95.9036	67.8366	67.4604	59.9071	44.8416	54.5462	61.3989	114.411	142.742	179.184	82.5261	99.1234	90.8268	69.0243	50.146	55.566	93.5287	93.8233	79.896
AC004840.9		0.0733675	0.111054	0.0184511	0.129201	0.0397068	0.0190624	0.187138	0.240271	0.149862	0.163683	0.161193	0.237495	0.257391	0.0978907	0.364433	0.453814	0.656192	0.115878	0.143388	0.0673707	0.247335	0.132606	0.277792	0.0738069	0.123537	0.230552	0.250017	0.115398	0.747298	0.229908	0.0393658	0.293038	0.279055	0.307647	0.452598	0.114458	0.0567854	0.101211	0.812462	0.339543	0.216026	0.0207093	0.176649	0.0203999	0.118117	0.241053	0.196458
AC004878.3	0.178975	0.475151	0.154919	0.334596	0.199044	0.247494	0.468572	0.0988264	0.26565	1.6295	0.623716	1.45903	0.703525	1.5127	1.15011	0.480374	0.646046	0.612948	0.767824	0.482149	0.639005	0.34099	0.269523	0.611237	0.925642	0.748251	0.470728	1.05142	0.34113	0.397411	0.349384	0.482427	0.287537	0.503533	0.327894	0.856136	0.153588	0.197931	0.278316	0.4776	0.188306	0.491451	0.784945	0.339316	0.74692	1.32347	2.22893	1.00332
AC004889.1	0.327737	1.19102	1.67327				0.000562241	0.000622737	0.000648823	0.707513	0.000571135	0.863108	2.27208	2.30736	1.77959	0.000786917	0.618225	0.000573309	1.63868	1.68686	0.000644835	0.634271	0.312903	0.574538	4.0708	4.37451	2.63374	0.000536144	1.58029	0.615288	1.53811	1.70771	1.74678	0.440836	0.30946	0.000596678	0.000514641	0.000528845	0.000586168	0.799176	3.22878	0.532966	0.443902	0.479097	0.000582328	0.479756	0.603224	0.44193
AC004893.11	0.340831	0.785138	0.522869	0.477955	1.15584	1.27666	2.15769	1.28437	0.820001	0.248934	0.0589249	0.154957	1.77758	0.767975	1.1818	1.39916	1.34881	1.761	0.891907	0.189097	0.686815	0.594317	0.205466	0.26235	0.380644	0.285564	0.866922	0.338627	0.205748	0.114289	0.385507	1.6682	0.764139	1.51206	1.24622	1.13792	0.795329	0.833951	0.358644	2.13738	1.1971	1.06976	0.395166	0.489215	0.671767	0.410463	0.3176	0.783027
AC004899.3	0.211367	0.27393	0.0804552	0.0459785	0.0133787	0.123214	0.213402	0.103344	0.108423	0.0532648	0.139832	0.255734	0.0134087	0.146373	0.227873		0.102396	0.0381636	0.107844	0.0254289	0.139259	0.28385	0.235295	0.271521	0.0459341	0.120705	0.17105	0.0119411	0.0477422	0.14995		0.0855793	0.0726961	0.0231083		0.0534636	0.0711148	0.0471917	0.0754431		0.0248089		0.102857		0.0759513		0.033201	0.0304537
AC004917.1		8.07683e-10	3.016e-08		2.84075e-09	1.28214e-08	9.24175e-09	5.85525e-08	2.37999e-07	4.24905e-08	3.07058e-08	3.32948e-09	2.18821e-08	9.66791e-09	5.27758e-08	7.15178e-09	2.04948e-07		4.72852e-08	2.61839e-08		1.52395e-09	3.35822e-09		1.43426e-09		1.30449e-08	4.30267e-09	1.89089e-08	1.87592e-08	1.10508e-08	1.68182e-08	5.51575e-08	2.73752e-07	4.35499e-08	2.85406e-08	8.65523e-08	1.4102e-09		8.07706e-09	3.652e-08	1.1523e-07	3.13795e-10	3.74639e-10	2.45768e-09	3.3816e-08	1.98231e-07	1.05217e-07
AC004951.6	0.23881	0.209477	0.417854	0.103938	0.12719	0.069001	0.125822	0.3353	0.228037	0.320765	0.577402	0.342417	0.346071	0.500717	0.288971	0.207614	0.511613	0.535978	0.222559	0.184277	0.00631021	0.128468	0.17757	0.268043	0.203473	0.24829	0.183708	0.222032	0.433283	0.131765	0.286113	0.328768	0.46297	0.244889	0.061478	0.290123	0.401555	0.158967	0.459053	0.364774	0.528929	0.493262	0.311538	0.218303	0.771023	0.0498094	0.230378	0.248401
AC004980.10	1.34837	1.38986	0.784165	1.15578	1.19708	0.341131	0.602505	0.734838	0.373176	0.446498	0.465072	0.709179	2.15947	1.60396	2.56466	0.252831	0.100861	0.697223	2.39014	0.302872	0.48589	0.683197	1.32579	0.516289	0.965324	2.81158	0.77082	0.334568	0.871909	1.11441	0.213277	0.259213	0.459307	0.744745	1.53416	0.363273	0.748468	0.627201	1.11841	0.95276	0.399945	0.64536	0.205341	0.717437	0.648592	0.970153	1.97078	1.52978
AC004980.7	1.27192	0.895767	0.375454	0.889158	0.788535	0.59062	0.920799	0.634651	0.913905	1.08222	0.64882	0.625845	3.05703	1.79084	2.36751	1.0501	0.403231	0.305868	0.571993	1.38764	0.765499	1.23399	1.01271	0.297623	0.596614	0.856805	1.43735	0.498359	0.321115	0.873917	0.878485	0.694836	1.22134	2.07091	1.33241	1.89594	2.81637	3.38364	2.25041	1.30823	1.44532	1.2408	2.88557	2.68998	2.66388	1.09536	0.693486	0.0646679
AC004987.9	0.164919	1.38824	1.67232	0.375314	0.569286	0.964623	4.82838	7.56467	6.43008	0.742545	1.20666	0.217805	8.86603	6.67582	8.81615	2.84261	1.43933	2.15106	4.37168	3.05325	2.50591	1.0136	0.579523	0.414982	0.640442	0.949245	2.46011	0.843527	1.59574	3.41802	8.61891	7.17608	7.45689	1.4009	2.00897	1.48283	6.05765	2.0856	1.31157	5.25053	2.51365	2.48395	0.0419815	0.048124	0.536454	0.700599	0.698924	1.04303
AC005000.1	5.08516e-06	1.40019e-06	4.8356e-06	2.18584e-06	2.25317e-06	1.3463e-06	8.24132e-06	2.14084e-06	2.35009e-06	4.64324e-06	1.90741e-06	1.1983e-06	1.60687e-06	1.35547e-05	2.4384e-06	2.93876e-06	1.16609e-06	1.10169e-06	4.67946e-06	4.59022e-06	9.37539e-07	2.18872e-06	3.2236e-06	2.18224e-06	5.02781e-06	2.65203e-06	3.95485e-06	0.000126209	1.86872e-05	9.12924e-06	8.63829e-07	2.76904e-06	2.85142e-06	3.62983e-06	3.90347e-06	1.41479e-06	3.74493e-06	3.1999e-06	7.23205e-06	3.32015e-06	1.96366e-05	2.1024e-05	1.50367e-05	2.41525e-05	5.03731e-06	2.35613e-05	2.72248e-06	6.67337e-07
AC005003.1	0.21589	0.194403	0.565864	0.152227	0.20264	0.186681	0.673202	0.611452	0.436372	0.327651	0.288812	0.505343	0.304674	0.6805	0.172615	1.57131	1.57573	0.53009	0.590077	0.674204	0.342937	0.514947	0.690582	0.700792	0.565024	0.373881	0.338937	0.0904487	0.248653	0.361502	0.540184	0.509268	0.436059	1.53144	0.891525	0.759552	0.336602	0.223175	0.428535	0.477751	0.0704636	0.253859	0.121737	0.461299	0.815139	0.462821	0.471759	0.519207
AC005013.1	0.000207557	0.000183185	0.000189041	0.00019722						0.000320138	0.000207811	0.000185549	1.68117	0.87612	1.66029	0.784013	0.773286	0.000215216	0.000197159	0.000209793	0.00023065	0.000198422	0.000190968	0.000190152	0.000189985	0.000181945	0.000199903	0.000196214	0.000197804	0.000219055	1.08364	0.000203122	0.000200953	0.000188791	0.000207462	0.000229194		0.000211386	0.000211254	3.30065	0.426707	0.000271857				0.000203196	0.276953	0.584808
AC005042.2	1.6184	1.43144	1.53846	0.0633028	0.431732	0.0656461	0.514704	0.347212	1.6574	0.433928	0.341851	0.0593954	0.790513	0.918609	0.729834	1.14497	0.408474	0.472787	0.764292	0.474731	0.515822		0.126094	0.268132	0.877586	0.712957	0.192124	0.319334	0.0635565	0.433345	0.464762	0.59039	0.898468	1.85831	2.6286	1.20303	0.19129	0.391577	1.01259	0.854922	1.52932	0.783665	2.40476	3.36543	1.41442	0.521499	0.218646
AC005076.5	0.898447		0.58725	0.874977	1.78624	0.974014	2.25415	0.810251	1.55619	0.844683	0.507677	0.0629638	0.609652	0.44919	0.0859586	0.142834	0.288557	0.21467	0.674852	0.503181	0.936542	1.28866	1.47081	1.63702	0.799085	1.19823	0.882945	0.677118	0.0673543		0.758105	0.904407	0.883698	0.563597	0.356968	0.224863	1.54984	1.72333	3.5082	0.0755548	0.56408		1.38773	1.23434	0.999216	3.04017	1.29626	2.64294
AC005154.6	7.07883	3.36323	4.05286	5.6765	7.5171	5.9844	6.74404	6.19233	6.47474	3.23347	1.48051	2.13565	4.99091	6.37806	4.77879	10.6632	7.05698	7.74721	4.81913	6.73742	6.78287	5.91188	5.88046	6.41597	6.21896	6.32483	5.60227	2.87864	2.82455	4.01891	11.4888	11.4395	9.21945	9.67006	8.61237	8.42245	10.2954	12.7154	13.3036	6.52301	6.53391	6.86561	2.19703	1.81761	1.41241	13.1699	10.6117	11.642
AC005224.2	0.347393	0.208143	0.287771	0.104893	0.0609259	0.140168	0.0270148	0.470604	0.0924908	0.364138	0.17367	0.556671	0.12209	0.0605341	0.172847	0.343431	0.23294		0.163546	0.260377	0.474996	0.107761	0.160681	0.0562493	0.36651	0.249993	0.135839	0.217418	0.190083	0.248008	0.0498857	0.111328	0.110212	0.263016	0.0578571	0.0303944	0.134942	0.134624	0.171757	0.846485	0.395316	0.518316	0.234079	0.277012	0.143988	0.222437	0.188672
AC005255.3	17.7901	21.2313	17.5445	48.6997	25.479	47.976	33.6395	59.6177	46.5174	7.23206	21.3011	29.1772	11.3953	11.0975	6.72444	14.3884	13.0975	7.89847	57.4472	62.6253	14.7354	13.1129	35.8866	13.5365	22.8826	25.3294	16.596	16.1887	17.6792	16.4704	15.9315	7.86571	10.9582	7.41296	7.33973	6.12217	20.8438	46.449	17.3724	28.2365	5.08752	55.4524	6.20496	4.30067	2.36056	19.2272	23.003	19.2035
AC005280.1	2.23516	0.000605672	6.44017	2.92724	0.000684334	2.13505	0.000633909	0.000779182	1.09242	0.000700251	4.24331	1.94098	5.9382	6.70157	0.000744968	8.81317e-09	1.31091e-08	0.00058262	0.000645993	1.1248	0.00074626	0.000477012	3.91933	0.000336073	0.000504662	4.5671	0.000354596	1.0273	1.20677	3.36124	1.06326	1.05819	3.0761	1.00419	0.000656683	0.000714778	4.13124	2.06068	0.000680144	3.69446	0.000779221	0.000415598	0.000691606	0.000653003	0.000663762	1.05654	2.91812	5.08955
AC005519.4	0.23448	0.0601039	0.0301604	0.25492	0.491911	0.0646057	0.665919	0.516021	0.454652	0.38539	0.388699	0.334372	0.510427	0.298243	0.724343	0.344758	0.321134	0.0666587	0.274374	0.177419	0.206283	0.340801	0.46006	0.242597	0.511536	0.282577	3.6775e-60	0.396564	0.281594	0.56386	0.172343	0.0641882	0.126919	1.14967	0.574806	1.0336	1.29071	0.616652	0.598109	0.069721	0.268021	0.370332	0.903871	0.733964	0.267647	0.918469	0.394465	0.535709
AC005562.1	3.64363	3.24347	5.16144	6.5044	4.56051	5.10888	3.41951	5.04621	4.46241	2.44793	2.29331	5.45905	0.19927	0.779645	0.270886	1.41151	1.04573	0.397851	2.02984	3.73005	0.962325	1.51828	1.24325	1.61044	3.43586	4.36368	2.58173	6.39145	5.68409	4.7876	3.69526	3.1978	4.41836	1.11568	1.14293	1.03553	7.88012	9.85894	10.2295	5.02655	7.86597	4.211	2.62664	0.879293	1.87357	3.03957	3.95771	4.5597
AC005606.1	0.193052	0.536052	0.0288917	4.6925e-05		1.42613e-18	0.190786	3.29303e-15	2.10945e-95	4.82565e-54	1.28726e-75	1.62571e-17	1.74496e-06	0.261403	0.213459	1.52094e-41	0.469385		1.90301e-75		0.0717085	0.0542909	0.0483505	0.178591	0.305634	0.606476	0.837723	0.576252	0.585917	0.091052	0.13574	3.51635e-58	9.11048e-52	1.24797e-13	3.10362e-39	6.04448e-39	3.07566e-23	0.168065	0.103774	6.13776e-49	0.136324	0.591413	0.641725	0.534878	0.588658	1.26927	1.35902	0.769856
AC005614.5	6.14731e-253	2.99721e-162	1.12169	0.238422	1.22942e-74	5.71317e-129	2.03712e-62	7.99592e-101	1.34769e-124	1.31047e-163	6.48609e-22	1.18611e-89	1.03707e-58	9.99361e-250	5.02102e-151	2.3841e-191	2.90418e-51	1.09835e-35			1.36877	5.38015e-69	1.70982e-172	7.32083e-157	7.10496e-303	1.86393e-165	4.8459e-294		1.99594e-111	1.51232e-47	6.68986e-77	4.09668e-172	3.13804e-115	7.77566e-69	3.00821e-283		8.91288e-135			8.82023e-253	6.94463e-62	1.31308e-124	1.07225e-43		1.51914e-227	6.1228e-101	4.25347e-182	1.59269e-199
AC005618.1	7.29789e-07	4.95212e-06	0.000105296	3.71012e-06	0.260582	0.831601	0.309357	0.928838	0.825123	1.67407	0.72508	4.55321e-06	0.78823	0.679665	2.41233	1.67216	0.669745	0.352313	1.58241e-06	9.9532e-08	0.607543	0.660106	6.15846e-07	3.13319e-07	1.39942e-06	1.71679e-06	1.88254e-05	2.84441e-06	1.90399e-05	0.00174573	0.992746	0.471137	1.18765	2.87896	3.39128	2.86967	1.60151	8.29096e-06	5.05572e-07	0.971059	2.59325e-07	2.40962e-06	2.47047e-07	9.69672e-07	0.208476	0.421876	1.41564	2.35257
AC005618.6	0.126606	0.0801581	0.150708		0.0404291	0.024892	0.107199		0.0684908	0.141032	0.102438		1.00748	0.798886	0.613462	0.486733	0.174104	0.0257264	0.350861	0.29529	0.35239	0.333128	0.320308	0.223136	0.126693	0.0110317	0.0601436	1.55424	1.79673	1.5172	1.5316	1.41719	1.59379	1.24649	1.31278	1.1	0.167133	0.153244	0.253446	0.0803204		0.0270966	0.194633	0.196961	0.140764	0.966145	0.471101	0.215833
AC005682.5	0.178094		1.07415	3.24625	3.03776	2.842	1.93501	2.32654	3.04971	3.17063	4.49048	4.12384	1.68173	1.34279	0.49844				0.376343	0.576833	0.248477	2.08284	0.417593	2.07309	2.0046	2.74085	2.78812	2.3216	2.82712	1.06219	1.01092	0.720224	1.01457	0.461852	0.315151	0.358141	14.6295	12.549	12.636	0.837646	1.13947	3.02222	15.7508	16.4204	15.0598	5.80456	4.003	4.67822
AC005795.1	15.2948	18.7769	16.9397	12.7195	16.6716	18.9996	11.2868	12.6241	9.9661	25.1372	25.3153	28.9707	12.4606	18.9548	16.1607	8.72973	10.5835	12.3644	14.4099	11.2238	11.6899	11.9832	10.7219	11.0914	22.0161	23.3101	24.6614	15.8798	18.569	21.8021	21.7757	25.3333	21.4651	4.04929	6.52116	3.95112	13.3605	11.3424	13.3541	16.4601	16.5019	16.4336	8.14096	9.1649	10.5086	8.62367	16.6417	15.0383
AC005822.1	15.4353	10.1858	12.8944	10.3979	7.43434	8.33241	10.7554	11.4435	8.47264	9.07026	9.33103	9.08953	7.51285	9.57881	7.6133	15.4753	15.6957	15.5139	5.1422	4.63445	5.96214	9.12547	9.96422	9.71093	13.3821	13.4985	9.68947	13.1879	11.7249	11.7564	5.18852	5.89127	4.26481	7.86066	7.46393	7.64044	5.89726	8.53937	10.07	14.2166	16.3888	15.3549	7.8183	6.99773	7.06575	9.57109	9.85026	9.34932
AC005838.2	14.6802	9.95153	2.85481	0.742522	1.64905	2.43841	4.83378	1.27502	2.64837	2.96182	4.83214	0.490283	3.50662	6.77102	1.05025	7.60215	0.593363		8.22273			12.3159	4.62371	7.34575	9.87782	5.28159	1.44537	2.73158	4.37043	1.64579	4.84565	0.589224			4.66313	3.32546	5.74633	4.875	6.42874	3.48475	1.81999	1.02636	3.28914		3.94077	2.22255	0.675541
AC005884.1	2.32155	0.490042	0.387012	1.53548	1.92065	1.71386	1.64629	1.94128	0.98158	1.60211	1.04195	0.445854	1.90348	2.44402	0.979474	1.16038	1.43601	0.971632	0.420474	0.592181	0.901683	1.39755	1.1923	2.17633	2.39815	0.767299	1.45558	0.481232	0.394624	0.532344	0.142573	0.912024	0.157426	1.22418	2.23232	1.73393	1.38099	1.244	1.0242	1.41379	0.979868	0.764422	0.746399	1.20073	0.835517	2.97948	1.89202	1.57125
AC005943.5	0.0454492	0.020473	0.247668	0.10303		0.177056	0.319077	0.20872	0.194776	0.215021	0.205385	0.259595	1.22789	0.573759	0.736678	1.17399	0.436872	1.1199	0.150687	0.114183		0.21226	0.232372	0.243573	0.144178	0.137837	0.685642	0.128664	0.171518	0.171461	0.0197086	0.0878022	0.0653129	0.0829841	0.0914269	0.0720526	0.404267	0.317161	0.112875	0.143062	0.044546	0.0722364	0.0230901	0.131265	0.0909582	0.0438943	0.164114	0.0820919
AC006011.4	17.4676	16.5763	4.58133	0.368077	7.94841e-12	0.64715	5.86146	0.0139562	8.51845	2.54596	3.0741	6.53701e-05	2.05031	4.65105	0.112692	0.200689	3.67901	6.46368	6.14164	0.696686	3.17042	12.5394	1.08491	5.47537	8.86461	0.000291865	5.22257	1.68511	2.2887e-17	1.84865e-11	8.32115	0.287637	9.6681	3.10005	1.43367	5.17985	4.75673	0.552893	10.6751	3.53926	4.01755	0.00359418	1.07424	4.07789	1.65048	5.85052	0.795056	0.281509
AC006024.4	3.26118	1.97307	2.86621	0.595041	0.346117	0.254958	1.34981	1.20312	2.04717	1.62639	1.59175	1.61066	1.73436	2.07876	1.65043	0.468361	0.423753	0.171086	1.32649	1.23659	0.950812	3.13354	3.48171	2.96369	1.92574	2.39635	1.35427	0.7537	1.21019	1.02948	1.49778	1.40426	1.45397	0.358674	0.210549	0.954068	0.637804	0.586364	0.494432	0.137411	0.0513366		0.984443	0.503954	0.523864	0.404573	0.446458	0.346534
AC006026.10	0.574725	0.28976	0.290515	0.13	0.150458	0.44932	0.567869	1.08944	1.02597	0.637947	0.571842	0.436937	0.866342	0.596753	0.63951	0.317839	0.215338	0.427855	0.36953	0.356757	0.740987	0.599212	0.462674	0.417372	1.00442	0.988822	1.20723	1.13994	0.435194	0.649187	0.553025	0.54965	0.441206	0.357057	0.748336	0.636416	0.29993	0.367318	0.318028	0.223883	0.662097	0.112729	0.433106	0.375536	0.212985	0.651468	0.812699	1.02321
AC006026.9	0.596929	0.494539	0.693299	0.454585	0.579948	0.441367	0.469094	0.462598	0.84326	0.853027	0.383337	0.71267	0.505492	0.301083	0.601424	0.308101	0.361991	0.599664	0.948909	0.743072	0.472702	1.49324	2.37284	1.11616	0.670604	0.806389	0.58483	0.65279	0.832608	0.436994	0.641171	0.345656	0.365557	0.152451	0.143922	0.504093	1.02757	1.08852	1.99077	0.25031	0.701448	0.505432	0.290849	0.252572	0.1432	0.253403	0.360061	0.43073
AC006273.5	0.568284	0.938985	1.3263	0.306059	0.949425	0.436479	1.3869	2.08897	2.2748	0.540932	0.194681	1.06639				0.639461	0.0813761	0.484125	0.332386	0.863386	0.791454	3.32466	2.87752	1.29055	0.906594	2.23186	0.794774	0.0764716	0.151993	1.03471	0.631015	0.96587	0.66555	0.747759	0.482808	1.43595	2.86792	2.21525	1.09856	0.919686	1.91216	1.37979	2.9832	1.59917	6.19592	2.65451	2.81883	2.49714
AC006486.1	0.170437	0.0512591	0.258783	0.0343655	0.12041	0.166575	0.106562	0.077515	0.0203643	0.239352	0.286024	0.18365	0.080495	0.159985	0.114066	0.0188712	0.153851	0.0382377	0.108035		0.0628204	0.212744	0.28251	0.0739457	0.257822	0.263101	0.125347	0.44817	0.304814	0.061482	0.181392	0.366902	0.109295	0.485512	0.592835	0.361733	0.0355566	0.158623	0.113196	0.418478	0.223395	0.0402811	0.540522	0.182994	0.285279	0.275274	0.187337	0.228993
AC006486.9	6.80953	0.0393087	1.03011e-07	0.882492	1.52331e-22	5.28836e-27	2.60374e-09	2.63154e-36	2.19355e-07	2.9122e-71	4.39913e-10	1.46355	9.22698e-22	3.41009e-05	1.08591e-09	1.1733e-05	7.91471e-12	1.00116e-05	4.32134e-05	1.1715	0.111818	4.27406e-10	2.52073	2.9412	4.57869	0.000400763	0.00983045	3.31419e-11	0.0555433	1.10081	1.4198e-55	1.81137e-13	4.69487e-09	0.609913	2.68198e-15	2.60215e-08	1.04535	0.624798	2.30279	8.55224e-34	3.34155e-13	0.509059	3.72471	0.534107	0.382984	3.97372e-16	0.000170323	2.62613e-21
AC006538.1	0.223045	0.45122	0.680854			0.135126	0.0260313		0.0297227	1.34502	1.11589	0.878091	0.353042	0.116722	0.166621	1.24137	0.505281	0.502137	0.157672	0.167336	0.152662	0.207698	0.283944	0.108401	0.252226	0.337266	0.523718	0.471547	0.654454	0.717356	0.0721471	0.187783	0.0796972	0.0253515	0.083675	0.0293055	0.728316	0.440854	0.22073	0.233113			0.0846155	0.0267063	0.0555252	0.0268036	0.0909676
AC006538.4	1.13776e-06	0.000140007	0.000286404	0.573666	1.31168	0.766952	8.16693e-05	1.30772	0.024297	4.95526	2.80879	0.501286	2.23769	2.92087	1.06377e-09	2.59177	1.34211	1.7112	2.05054	1.61022	0.59704	2.49971	6.98413e-10	0.184839	6.72809e-08	7.23691e-14	7.64787e-06	2.66845	1.96187	2.64819	0.936424	0.320899	1.0153	0.771728	4.13963e-09	0.0859431	3.57414	0.159104	7.10549e-15	8.06696e-08	0.075595	1.09012e-06	2.47256e-06	5.34744e-06	0.554593	0.74377	2.24516	1.38713
AC006978.6	4.07681	4.55021	2.0852	3.39239	1.99607	1.83898	6.83135	5.01365	3.88797	1.75013	1.73563	2.5952	1.31722	2.03173	1.95928	6.21525	6.09988	7.3118	6.54411	5.23228	5.39825	2.38525	3.15056	3.23521	3.34175	2.42817	3.41993	3.99513	5.25486	4.5976	8.47999	10.877	7.821	4.03758	3.80148	4.4281	2.17254	3.06428	2.09813	5.90866	8.76586	7.05471	2.16723	2.98719	1.92404	2.29713	1.64787	0.936932
AC007036.5	0.00969685	0.702835	1.98435e-69	2.94319e-39	1.19983e-122	7.63785e-113	1.4992e-138	1.1287e-279	8.44998e-18	1.15129e-141	2.05823e-60	3.56739e-86	4.04947e-19		1.81924e-61	0.0276478	4.06105e-276	0.016112	6.07958e-28	6.85844e-117	6.3295e-58	5.75886e-44	0.498944	0.231559	0.338907	1.28894e-09		0.310645	1.87666e-07	0.348591	1.01144e-48	0.439351	1.80026e-120	0.518245	8.03484e-159	6.04058e-64	5.0347e-192	1.26823e-42	8.57045e-242	1.00639e-90	1.81257e-103	0.293659	0.213936	1.64434e-122	2.91721e-123	7.81659e-301	7.6131e-46	5.66678e-66
AC007038.7	0.340874	0.170864	0.345044	0.154645	0.12041	0.0925416	0.408487	0.542605	0.366557	0.139622	0.190683	0.283823	0.181114	0.399963	0.273758	0.717107	0.423091	0.401496	0.504164	0.401006	0.314102	0.0709146	0.0882844	0.184864	0.326574		0.250695	0.412316	0.215163	0.266422	0.214373	0.0550353	0.109295	0.346794	0.0956185	0.120578	0.0888915	0.211498	0.226393	0.657608	0.6888	0.523654	0.675652	0.677078	0.66565	0.256922	0.174848	0.0686978
AC007040.11	5.9387e-50	4.36003e-100	2.55509e-55	1.22445e-92	9.7525e-107	1.2281e-74	2.53498e-46	1.16421e-48	0.0059609	0.0105753	0.0058072	0.0488097	0.0052633	5.77645e-80	6.42565e-38	3.0648e-54	4.00464e-54	0	0.0052521	0.0102048	0.00576565	0.0968245	6.95335e-82	0.0117855	6.27605e-195	8.2838e-118	9.0602e-88	0.0286091	3.93041e-116	2.35012e-189	8.02145e-77	0.172327	0.0205146	0.00475561	3.25504e-40	0.00556355	7.483e-43	3.23624e-95	0.0222634	1.04259e-55	2.54339e-52	0.0109238	0.026411	0.0528655	0.0244013	1.37692e-140	3.71729e-84	1.77905e-43
AC007041.2	0.666532	0.745109	0.819827	0.753114	0.173797	0.877265	0.927125	1.42614	0.306796	1.12845	1.44494	0.972519	0.260941	0.301081	0.147598	0.326179	0.952137	1.06903	0.813655	1.44079	1.48348	1.07734	1.06839	0.965446	1.12494	1.28609	0.851943	0.832063	0.115858	0.440254	0.602126	0.733892	0.117378	0.56219	0.451914	0.215777	0.423459	1.08393	1.22425	0.60323	0.362117	0.736764	0.499873	0.118124	0.573255	0.593472	0.642002	0.442239
AC007228.9	0.243247	0.0779008	0.312566	0.267298	0.273137	0.0334722	0.210171	0.685627	0.496821	0.381397	0.29413	0.317338	0.310016	0.2348	0.268361	0.25647	0.104276		0.471765	0.397311	1.01993	0.241701	0.112001	0.0504992	0.15679	0.314083	0.194817		0.0324204		0.476138	0.349258	0.575276	0.282871	0.345155	0.145043	0.129062	0.04846	0.479	0.216778	0.371162	0.20016	0.104851	0.181854	0.0171892	0.0498068	0.101222	0.206483
AC007229.3	10.498	10.4363	11.3759	5.775	6.50508	5.07697	6.96651	3.38316	4.09869	8.90518	4.98211	8.26872	4.69937	4.24152	5.49913	0.231768	0.457924	0.224216	11.0889	5.04784	4.10918	21.5413	13.2145	17.5207	10.6301	7.61094	5.94143	7.00026	11.3278	5.02388	8.43295	11.3078	7.82135	5.11102	2.66228	4.18882	5.58076	7.54856	10.2251	0.7436	2.75998	0.955373	8.45077	4.97615	4.98158	15.6086	18.7322	16.5553
AC007238.1	24.3623	20.4334	19.4963	28.8926	26.5551	24.1668	20.7201	19.5803	23.3206	14.6028	20.1877	16.8833	11.2353	14.9554	12.8277	12.8807	15.6193	17.0633	20.6084	21.3314	33.5331	25.2566	27.9171	40.0896	18.1649	16.7998	12.8426	13.251	13.2614	13.9748	18.1081	15.873	17.2349	11.7787	9.88649	14.5622	26.0855	29.9657	37.2163	27.1217	35.281	33.7938	13.8681	12.887	10.4261	30.0458	24.8606	22.7463
AC007246.3	0.483674	3.56997	2.30824	0.686087	0.323787	0.2405	5.61237	5.86712	5.61975	2.3402	1.52042	2.18943	0.0172936			7.93915	8.18049	8.09687	2.60945	2.4834	2.25655	3.81116	2.84041	4.09093	3.28217	4.61908	4.76145	0.801108	0.913259	0.95153	2.223	1.52269	2.07936	2.53606	4.34691	5.90502	2.96619	4.89988	2.5528	1.20197	1.61082	1.50275	3.66029	2.56919	3.2092	0.5497	1.60673	0.337478
AC007255.8	0.575958	0.379229	0.128837				0.247482	0.456727	0.0704685	0.743632	0.41099	1.01409	0.339108	0.351212	0.139512	3.15168	2.81017	3.4699	0.0311503			5.35947	4.15442	4.74872	1.10577	0.629658	0.37292	0.109828	0.186229	0.326955	1.71364	1.63818	1.6094	0.857445	0.860969	0.781735				1.85444	2.46028	2.47534	0.237157	0.158284	0.621697	0.127147
AC007256.5	0.496935	0.409491	0.42758	0.345046	0.279647	0.143419	0.398369	0.495093	0.568199	0.169688	0.265711	0.271607	0.342854	0.40304	0.300462	0.233841	0.685618	0.459427	0.362853	0.251518	0.178614	0.480137	0.123066	0.514703	0.571325	0.419809	0.374372	0.59709	0.23621	0.41313	0.421929	0.29831	0.268349	0.617682	0.652391	0.514216	0.399119	0.51705	0.335979	0.339478	0.374832	0.234156	0.164496	0.368773	0.250567	0.469213	0.435997	0.497233
AC007283.5	0.2533	0.899559	0.99437	1.21313e-297	0.922257		0.0676792	9.88008e-186	6.82764e-69	2.30304e-25	6.32518e-26	0.47698	0.737605	3.12085e-21	1.9031e-31	7.47994e-98	2.45177e-65	1.9447e-49	1.60009e-105	0.867767	0.133904	5.95932e-15	1.12714e-21	0.318914	0.320691	1.0028e-117		6.07453e-95	1.69272	0.665157	2.03073	1.12839e-10	1.08132	0.0931742	8.51644e-68	1.14278e-93	8.93042e-92	0.436642	1.14102e-40	2.11529	0.402988	1.80759e-247	1.44951	0.458139	1.19637		0.669349
AC007318.5	189.86	151.751	134.781	133.961	101.268	92.8712	123.152	120.484	104.339	139.761	117.394	152.239	177.384	205.686	185.848	47.2311	45.4871	51.0139	121.906	119.514	102.424	140.981	135.15	132.208	202.113	190.842	153.07	132.074	119.416	100.907	73.4346	73.4788	58.8235	57.9989	75.0901	67.3771	163.822	188.798	191.274	101.744	150.675	128.993	126.949	85.0713	103.498	222.401	218.639	154.578
AC007347.1	1.43986e-05	1.38182e-12	5.51032e-18	3.1836e-05	0.00135132	0.615555	1.90753e-07	2.41394e-09	1.55965e-13	1.22589e-06	9.52457e-16	6.9414e-14	1.00433e-07	3.29034e-12	2.0454e-16	1.6064	7.64799e-06	3.71036	0.0255361	0.0113507	4.01993e-21	3.6982e-05	0.00303746	1.22381e-09	2.16636e-23	5.83585e-09	9.04136e-11	0.000134744	5.63154e-05	0.000610802	8.80427e-06	6.17798e-09	1.75788	0.086826	5.12277e-14	6.54963e-09	8.16857e-10	8.15065e-10	3.4224e-22	1.23312	2.60781	0.00133308	1.23682e-09	4.92104e-11	1.49813e-09	1.71961e-20	1.68571e-06	2.63213e-30
AC007362.1	0.112634			1.00094	1.04772	0.658305	0.948995	0.436859	0.941453	2.4633	2.33039	3.93991	0.739988	0.426659	0.784499	0.111919	0.273571	0.249268	12.3152	11.4341	12.9024	5.766	7.20481	5.70764	0.0408382	0.156175	0.127459	0.574044	0.403886	0.0971453	2.81393	2.48096	1.8564	0.0617061	0.0453252	0.0952544	1.35008	1.99124	2.26057	0.0709192	0.110413	0.0954957	1.6483	1.86545	1.19494
AC007383.3	0.387976	0.684414	0.404892	0.627515	0.473758	0.719317	0.512503	1.00608	0.947237	0.715339	0.375129	0.455762	0.630543	0.696502	0.0888833	0.530967	0.745787	0.813655	0.778188	0.222977	0.24198	1.54399	1.59035	1.84177	0.689463	0.783174	0.421508	1.63062	0.905271	0.95997	1.08126	1.88884	1.06356	1.57553	1.77099	1.7043	2.35288	2.30188	1.62925	0.0781481	0.291707	0.156071	0.301283	0.496228	0.442724	1.14309	1.05236	1.23352
AC007401.1	0.133584	0.160493	0.101141	0.0807594	0.117691	0.195234	0.333527	0.181828	0.0954568		0.268383	0.0782876	0.0235969	0.0468657	0.347648	0.177019	0.112686		0.168799	0.268595	0.147179	0.0208015		0.151893	0.0807311	0.0578906	0.0419987	0.0210174	0.210142	0.120048		0.107566	0.0213401	0.345658	0.134426	0.164796	0.31279	0.310742	0.199126		0.0873176	0.212413	0.520512	0.659102	0.668653	0.0645335	0.0877505
AC007551.3	0.0514152	0.0465469		0.954695	0.35962	0.172235	0.0387429	0.0741188	0.122952		0.676816		1.00952	0.0109541	1.30083	0.113503	0.168494	0.0523641	0.213084	0.229905	0.0803489	0.0677369	0.0289609	0.0604802	0.0187256	0.0628028	0.0685126		0.0687106	0.0449237	0.0361494	0.912871	0.208401	0.494108	0.725772	1.08948	0.994485	1.30587	0.653989			0.0220598	0.555859	0.110241	0.659073	0.160688	0.254636	0.0376636
AC007560.1	45.5314	76.7704	34.6296	18.4608	9.14531	13.55	37.4995	38.8781	32.6564	27.9473	22.4592	24.5325	11.6219	32.0413	13.5976	10.4959	6.56956	16.1598	7.8341	12.8513	11.7382	103.622	69.4247	50.4214	32.5402	10.2883	29.2545	62.0494	39.3624	58.0848	21.7924	40.8613	41.8053	13.0447	2.95546	7.70402	50.2468	42.5874	4.48127	23.1026	18.5012	21.1793	3.63594	6.0632	1.61808	13.09	2.79364	10.34
AC007620.3	0.289272	0.161699	0.190951	0.0697945	0.416978	0.0997295	0.474726	0.267366	0.274194	0.264342	0.0771736	0.0449991	0.396765	0.13463	0.368888	0.828428	0.233097	0.888704	0.542523	0.168525	0.450851	0.335086	0.0238071	0.460518	0.25565	0.156801	0.0241492	0.193309	0.338124	0.842425	0.266323	0.264498	0.400429	1.13955	0.334631	0.0540897	0.215868	0.157178		2.04817	0.915823	1.05772	0.96938	1.0498	0.486696	0.469832	0.386275	0.746421
AC007773.2	0.844039	0.187901	0.608089	0.190385	0.0545995	0.249962	0.583816	0.263515	0.2746	0.273357	0.103758	0.316308	0.54604	0.32328	0.493685	0.307109	0.0518785	0.0515037				0.242034	0.143718	0.304036	0.141881	0.224834		0.194262	0.726165	0.055119	0.709457	0.298928	0.195928	0.517665	0.668669	0.378144	2.08028	1.51853	1.99908	0.432894		0.0543029		0.197335		0.64504	0.334441	0.491898
AC007881.4	15.2296	11.7322	11.2082	19.2161		10.9299	18.3776			59.4555	39.0564	28.0885	18.5254	7.89144	2.20088	16.5065		4.24851	3.77059	7.40162	1.58212	20.1467		6.69981	5.63889	1.5678	12.7672	14.7141	16.2788	9.39434	29.0423	14.974	37.7153	20.0971	10.3104	3.50767	20.9635	32.4513		16.2003	3.8143	9.00148			18.8549	4.87252	4.74406	8.7253
AC007969.5	96.2107	188.395	195.324	104.302	210.666	220.431	156.931	207.224	180.345	254.594	200.037	192.87	214.462	175.277	171.223	275.401	230.012	204.002	63.79	63.1346	32.4271	209.89	168.355	91.1611	108.204	86.444	166.25	79.0462	89.7294	112.702	96.7789	82.5472	89.669	169.114	174.699	121.662	268.207	188.8	113.261	137.614	79.0799	82.781	38.7044	29.5881	82.9853	158.633	112.516	180.736
AC008132.12	15.9179	9.14673	7.58381	6.81168	4.59756	5.0968	11.157	6.07263	8.84288	6.99206	6.44873	8.78708	5.64951	5.05402	3.91235	12.6836	8.87156	7.87101	8.52278	11.0583	8.57689	6.24667	4.21043	6.1345	7.01287	9.43792	7.33493	5.02836	7.09981	4.50884	7.0232	4.97064	5.70419	16.5506	16.564	17.8184	9.34823	9.50264	16.0806	4.41261	9.89482	5.48676	4.85097	3.25898	4.98242	8.40263	6.85605	6.17036
AC008443.1	0.727498	0.601566	0.90134	0.113667	0.269942	0.0672631	0.620168	0.0290471	0.190425	0.0825411	0.358452	0.270755	0.350744	0.283512	0.315882	0.856518	1.0327	0.640677	0.283496	0.154019	0.126751	0.58909	0.644005	0.280262	1.32038	1.78246	0.563972	0.451464	0.826387	0.129751	0.453668	0.0513804	0.251737	0.622294	0.578857	0.658928	0.404848	0.524631	0.323514	0.912503	0.718444	1.18878	1.83051	3.18096	1.61254	0.956656	0.885004	1.09932
AC008731.1	9.14346e-26	0.0343681	2.30956e-35	0.0931936	0.222919	8.74585e-98	9.66791e-35	0.0527179	0.128758	1.97829e-26	1.58279e-50	1.41703e-21	0.0453674	0.0676596	0.108673	0.273375	0.232468	0.826282	0.0545202	0.145728	0.0283893	0.0245492	5.41459e-29	1.0365e-38	0.105705	0.181474	4.70003e-32	0.119015	0.2255	0.0348366	0.321196	2.66742e-24	0.138952	0.296444	0.172343	0.0262124	0.0457022	0.0372818	3.35674e-26	0.248206	0.224835	0.172517	0.318909	0.179964	0.379415	5.20016e-77	0.224438	1.12881e-67
AC008738.1	1.03171	0.879311	1.42173	0.547488	0.783598	0.462572	0.968983	1.79386	1.29763	1.98828	1.39113	0.792493	2.56602	2.61363	1.68763	3.95753	2.82627	2.88741	0.499472	0.392386	0.430247	1.44389	1.69188	0.949888	1.11287	0.963185	1.69351	0.294705	0.0921059	0.335329	0.584749	0.686824	1.10802	4.58335	3.13943	1.9445	1.46487	1.25215	0.407087	0.0643009	0.17215	0.186226	0.119004	0.112801	0.117236	3.24816	5.05614	3.78021
AC008865.1	0.40032	3.10916e-06	2.82976e-05	0.55133	0.37176	0.0925511	1.92172e-05	0.000289193	0.00087259	6.32935e-06	3.75409e-07	6.49629e-05	3.06533e-08	0.150292	3.60518e-06	0.000116965	3.5467e-05	0.400748	0.000775843	0.399943	4.92641e-06	0.00301913	3.86701e-05	0.425235	0.225019	1.60404	0.405466	1.12714	0.813349	0.0854196	0.000992753	6.11677e-05	0.387841	3.0622e-07	4.28361e-06	6.97219e-06	6.69817e-06	0.819853	0.011771	0.698661	2.03838	0.00103507				3.27858e-05	4.07985e-06	2.71641e-05
AC009237.8	3.98658	3.17949	3.14604	3.82032	3.15334	2.92699				3.55328	3.45879	3.31536	1.11619	1.40718	1.0803	0.0131616		0.0339847	1.17332	1.28874	1.21934	0.718326	1.01308	0.793322	0.770119	0.640757	0.603586	6.14265	6.08504	6.03568	1.23433	1.39506	1.52875	1.40722	1.27326	1.58106	0.656162	0.963332	0.758585	0.0138955	0.110117	0.238622	2.09837	1.85376	1.46436	0.467155	0.363126	0.481874
AC009245.3	105.975	91.5813	75.107	90.0648	65.7416	60.1974	62.788	63.0876	56.4827	94.3125	73.6506	82.8238	60.944	60.2047	53.0194	58.0081	60.11	60.3607	54.0566	60.8478	51.0864	102.558	92.3505	87.5555	96.6755	82.9497	69.1084	50.3083	50.6899	40.7718	40.1301	38.8054	28.4954	59.2654	63.3158	57.1717	80.3169	113.397	100.044	71.3742	83.1867	73.9782	56.7411	39.1256	40.387	127.337	94.2996	88.7741
AC009299.5	0.159257		0.130378	1.27622	2.62231	2.76794	2.64438	3.27322	4.81251	0.626508	0.585394	0.754631	0.612556	1.61785	1.02909	0.286478	0.142678		2.14047	3.43938	0.306508	0.276082	0.671582	1.59469		0.128413	0.13614	1.62739	2.27545	2.69478	1.94011	1.40031	2.79159	0.395788	0.140181	0.147172	12.7274	6.48469	13.1635				0.728129	1.08668	1.55838	2.32381	0.995075	3.51438
AC009302.2	11.7344	6.33115	15.6408	15.2303	10.3932	14.4365	5.40006	13.3962	8.57402	39.0315	57.8654	59.9139	3.42302	8.10674	7.27073	5.3463	6.05466	6.67313	9.06119	8.70318	15.7336	8.41353	16.2176	4.9986	11.0581	8.56813	5.31633	8.07686	8.84224	4.93891	3.94726	3.38812	4.10776	4.1698	4.05551	5.58558	9.56299	7.38629	11.2306	7.17541	10.6377	9.88309	2.43691	3.47625	5.98969	16.3932	11.7425	8.99613
AC009403.2	1.48914	1.82062	1.54379	2.75446	2.30684	1.94992	2.87759	3.93708	2.41691	0.626605	0.932256	0.83853	0.54012	0.3593	0.375253	0.786492	0.413301	2.10063	3.16786	2.5472	4.63275	6.86151	5.79818	2.79618	1.37582	1.15021	1.35327	1.14909	1.3637	0.956408	1.34879	1.2088	0.816066	2.0052	1.73174	2.48855	1.1602	1.07609	1.32062	0.772783	1.13064	0.796461	0.882589	5.68552	2.1218	2.13515	1.36508	3.4514
AC009404.2	0.0646119	0.10518	0.377153	0.32152	0.192227	0.264056	1.02475	0.570213	1.01215	1.22713	0.809095	0.479405	0.233996	0.572197	0.357772	1.10936	0.826524	1.04221	0.576552	0.65161	0.270405	0.0971293	0.650738	0.406624	0.142149	0.18013	0.489666	0.526961	0.147117	0.347491	0.212321	0.0626772	0.0500396	0.142655	0.117385	0.082813	0.158217	0.266983	0.43896	0.190797	0.254515	0.123035	0.250353	0.573998	0.467473	0.188856	0.135925	0.0471915
AC009506.1	1.07924	0.861835	1.16396	0.271512	0.378282	0.435048	0.950681	0.730473	0.765481	0.345493	0.329479	0.3927	0.37899	0.21918	0.214599	0.592257	0.36148	1.0776	1.09975	1.64627	1.50679	0.752796	0.720464	1.19353	0.542001	0.336358	0.534133	1.82778	0.927084	1.25069	1.05788	1.32477	1.73863	1.63291	1.37656	1.63493	0.586491	0.362444	0.77016		0.379829	0.126168	0.605479	1.26093	0.595854	0.575343	0.546407	0.286504
AC009506.2	0.898413	2.19455	2.49068	0.457421	0.414249	0.441527	0.444507	0.735583	0.868329	0.359947	0.977649	0.933761	0.0951314	0.124846	0.124334	0.0726271	1.76275e-73	0.18766	0.531722	0.235037	0.143596	1.10513	2.19256	2.34124	0.480832	0.589311	0.534833	0.649752	1.12521	1.79092	1.06604	0.748365	0.930348	0.685453	0.359301	0.738191	0.229829	0.572463	0.872369	0.889484	0.388049	0.026424	0.357403	8.55288e-268	0.000469747	0.517437	0.355054	1.19376
AC009948.5	4.09449	2.40991	3.48868	7.7753	4.77491	5.83843	8.22517	6.45343	7.19196	4.27127	7.29803	3.99988	3.71792	4.04217	4.15781	1.92161	1.75054	1.9031	9.99106	10.0111	12.1509	2.64549	2.12684	2.88912				8.42309	6.35034	5.66107	1.07933	0.767794	0.646789	0.856641	0.539668	1.10833	10.8904	11.7629	12.3881	0.265756		0.248375	10.1903	8.69853	10.0632	2.68924	4.12869	2.61033
AC009961.3	2.84234	1.31979	1.38906	0.621975	0.051658	1.25977	4.82335	3.95475	3.20637	2.52237	3.54434	1.93287	0.299566		0.588804	0.941055	2.78921	1.01549	2.451	5.07191	1.59694	0.0152073	0.0909219	0.619502	2.20332	3.00694	0.471326	0.609235	1.32191	1.71396	2.04597	1.67065	4.34781	7.16299	1.67157	2.85014	1.81932	2.25211	1.78291	1.56534	0.597584	1.4734	1.00576	1.01558	1.64823	1.1306	1.52623	0.919193
AC010335.1	0.216292	0.429785	1.56853e-20	0.0197345	6.39252e-32	2.65183e-50	3.93114e-37	7.00561e-10	4.02522e-20	8.63947e-11	4.92669e-31	5.18221e-14	9.0634e-13	7.80892e-10	2.91307e-30	0.000647554	4.98828e-07	7.28377e-75	9.00624e-05	1.27684	2.56008e-35	1.41419e-14	0.00036356	0.43329	0.0138368	0.548364	5.8823e-10	0.691121	3.1494e-11	3.40897e-18	1.69935e-26	0.00185089	7.39587e-49	6.15084e-18	2.83482e-19	4.97283e-21	1.95011e-25	0.0144639	0.2637	2.68445e-20	6.68296e-15	2.75526e-12	3.41188e-14	0.0784074	0.186002	2.04239e-15	5.87405e-25	0.431644
AC010336.1	0.0162766	0.0811133	0.112193	0.0443852	0.130358	0.208889	0.168825	0.218217	0.168044	0.267112	0.305526	0.289696	0.200611	0.0781941	0.277145	0.130887	0.0668132	0.0249198	0.117312	0.174019	0.10927	0.122693	0.160718	0.0559014	0.0296635	0.0497633	0.0232765	0.310964	0.529333	0.365264	0.143379	0.127184	0.110867	0.202905	0.174574	0.148538	0.130872	0.0985361	0.0408679	0.103621	0.0403427	0.0962277	0.594504	0.453068	0.305564	0.230942	0.179423	0.368517
AC010441.1	3.97009	2.95951	2.65341	28.5149	24.0021	22.5779	3.75883	4.49367	4.35084	3.13797	2.60994	3.96442	0.546213	0.768557	0.541681	2.11284	2.80447	2.70133	0.0610572	0.194307	0.0709875	10.0099	10.6834	8.41124	5.4487	4.78231	5.58991	3.34487	2.91896	2.94158	3.91372	3.54806	2.94394	2.31407	2.68007	2.95251	9.13035	11.7418	8.66357	0.540918	0.484244	0.273198	4.08195	2.68912	3.8485	12.3873	11.7539	8.59124
AC010468.1	67.3125	60.7925	48.7054	16.0635	13.9876	13.3718	19.5574	20.9561	19.2471	11.3596	8.14232	13.8252	21.4231	24.2468	22.042	5.2631	5.17319	8.93316	16.9345	13.3751	15.6347	27.6341	30.755	36.5184	16.4319	15.7417	12.5954	12.8573	15.3714	10.8324	9.96289	10.8134	9.7033	21.5337	28.7243	28.1689	13.1162	16.7236	18.6384	6.06769	7.14083	9.38764	8.74586	7.46089	9.68055	40.3196	51.0211	40.9784
AC010525.7		9.23521e-08	1.25747e-07		0.227396	0.0834423	1.25314e-07	0.439015		0.318147	0.0432131	0.175482	0.136545	0.522957	0.514807	0.170669	0.303168	0.0612793	1.3271e-07		0.0713339	2.27085e-08		0.126375	1.70838e-07		0.166675	1.48563e-07	1.07657e-07	0.477793	0.148194	0.249114	0.081852	0.235349	0.178799	0.0451399	1.16857	0.508847		0.225477		0.13602	0.0871797	1.4656e-07	1.47997e-07		0.0819787	0.102788
AC010536.1	0.0467701	0.225353	0.227861	0.0283068	0.132481	0.0611364	0.0878728	0.0639669	0.235472	0.230255	0.157349	0.165411	0.332208	0.0825935	0.169526	0.327121	0.412966	0.236889	0.0743596			0.248611	0.10202	0.0457297	0.212509	0.0813733	0.192127	0.177593	0.22211	0.423283	0.0817432	0.105987	0.165544	0.257617	0.252787	0.282262	0.0880208	0.0145127		0.164472	0.0153659	0.0166351	0.0796885	0.0302291	0.282728	0.0606126	0.185808	0.189216
AC010547.9	1.85114	0.935088	1.0757	1.41217e-13	4.36623e-69	2.35475e-29	3.95315e-41	0.458315	0.425165	6.02903e-11	0.166637	0.15748	0.081544	7.59018e-22	0.258286	3.20099e-10	0.127585	0.156777	4.76089e-09	0.191672	1.81832e-22	1.02986	2.77301e-07	0.594321	0.630499	0.715479	0.5566	0.298076	0.128438	0.446761	0.234247	0.17963	8.44969e-11	0.224551	0.26432	0.275062	0.188689	0.63146	0.475746	0.113997	0.112679	0.0591829	1.56868e-16	1.50923e-74	0.15247	5.53723e-49	0.240564	7.16579e-15
AC010642.1	0.888392	0.632408	1.02336	0.27	0.328109	0.756831	0.418271	0.401347	0.458583	1.0649	0.812625	0.641452	1.00328	0.788878	0.274444	0.478655	0.325128	0.258434	0.349097	0.349495	0.417973	0.746679	1.41176	0.814303	0.499925	0.257882	0.29903	0.557237	0.528958	0.472778	0.552199	0.55523	0.418166	0.631644	0.370917	0.844703	0.347173	0.232384	0.0484828	0.611773	0.189479	0.152157	1.24234	0.652593	0.559076	0.232591	0.691315	0.447949
AC010878.3	0.428052	0.424376	0.381118	0.257697	0.296421	0.135852	0.175904	0.0953803	0.099518	0.049413	0.0938834	0.0409186	0.395419		0.111772	0.278011		0.0466715	0.0439867	0.0935116	0.510047	0.350212	0.346921	0.778578	0.17088			0.131916	0.131562	0.199838	0.200959	0.135277	0.0887966	0.0425975		0.0489679	0.0437732		0.231949	0.0489763	0.0914576	0.0492017	0.425921	0.0894001	0.278952	0.314569	0.242665	0.72469
AC010900.2	0.50189	0.224929	0.322175	0.227053	0.262794	0.379466	0.266713	0.434938	0.30341	0.22472	0.0356712	0.218049	0.263162	0.148904	0.0851046	0.176238	0.0716423		0.0670591	0.106822		0.166125	0.560739	0.242994	0.0970123	0.0308408	0.100408		0.0668249		0.306651	0.068574	0.508115	0.453562	0.320105	0.29892	0.26609	0.19996	0.176342	0.148968	0.0695604		0.396252	0.579266	0.354297	0.273777	0.0463519	0.0425526
AC011330.5	5.98469	4.68216	5.27153	1.19231	1.0442	1.45381	2.93119	3.32498	3.08809	1.94262	1.81404	1.65516	2.79859	2.80545	2.75129	2.92665	2.58413	2.79869	3.7013	4.37911	4.46399	5.36385	5.1582	4.84911	2.30203	2.39194	2.15232	3.37306	3.106	2.92242	6.45136	6.82572	6.8334	2.14397	2.4114	2.09237	1.8348	2.02824	1.75494	3.56077	2.97798	3.03621	3.82191	2.77294	2.54773	6.63845	5.97955	4.33761
AC011737.2	805.134	625.78	557.806	409.521	293.496	289.06	354.49	333.82	346.777	686.324	577.397	617.192	589.721	688.392	546.561	144.195	148.163	177.703	322.73	326.395	293.979	877.909	909.524	771.712	555.522	498.808	386.482	370.527	379.905	284.587	529.594	474.545	443.059	641.944	679.714	674.943	279.598	335.817	327.14	281.686	313.374	258.341	408.871	284.498	311.172	881.394	781.745	634.07
AC011933.1	1.02434e-148	1.98291e-20	9.519e-23	3.30659e-51	1.87384e-13	8.7651e-68	1.7136e-37	5.15636e-15	2.69517e-08	3.52579e-12	1.75184e-31	1.48253e-12	9.61365e-17	5.33079e-14	7.04154e-15	4.84017e-11	3.55144e-14	6.41311e-26	7.80381e-36	2.07969e-19	1.77643e-44	8.35779e-21	7.52221e-38	1.56626e-62	2.43301e-70	2.29065e-77	4.03998e-18	2.9306e-33	6.00447e-23	6.20809e-30	1.83707e-11	3.50497e-10	0.000292348	1.40017e-32	4.11853e-52	8.33174e-37	4.46854e-44	4.13769e-35	1.80845e-78	7.40835e-10	9.16603e-45	8.18713e-25	5.44966e-67	2.81848e-270	1.05662e-21	3.87859e-35	1.41279e-35	2.94566e-08
AC011933.2	4.54519	3.93259	1.08538	2.72011	4.96101	6.5674	6.54618	3.04314	7.08542	6.27957	2.47194	3.70127	4.59975	5.98037	1.97939	1.94048	4.08856	3.13821	0.657031	2.35299	7.3681	1.71366	3.79657	10.9809	7.95862	6.92425	3.3742	3.47303	3.29942	5.57804	5.1856	2.82163	4.12502	3.76549	3.30019	5.09675	0.479752	2.29933	5.21583	6.19744	4.55071	2.70607	0.167248	1.33647	2.11333	0.886858	0.560138	0.778632
AC012066.1	0.885945	0.233448	0.152795	0.317853	0.805369	1.05746	0.963515	1.12247	1.07067	0.180568	0.59519		0.535513	0.174897	1.10612	0.501779	1.09594	0.919377	0.157698	0.168144		0.477746	1.09616	0.25105	1.17616	0.518562	0.557025	0.158511	0.472424	0.267911	0.574607	0.733556	0.238034		0.0833407		0.475834	0.328282	1.17451	0.531082	0.412919	0.705582	0.426173	1.44214	0.250248	0.0808146	0.10791	0.497305
AC012146.7	3.23019	2.89821	0.806992	9.09527	11.7271	6.2816	4.12603	7.31058	5.28358	2.41536	1.54162	0.439898	1.25181					0.829359	25.3626	21.2015	16.7911	11.5107	11.1345	6.24628	2.93388	0.961553	0.674513	0.158247	0.311523	0.221068	0.422172		0.932329	1.84999	1.6322	2.39613	40.8051	36.7192	24.2484	0.455672	1.03839	0.440911	1.01957	1.26393	2.47337	8.65961	4.08486	6.78621
AC012379.1	2.98592e-134	6.22159e-40	5.33815e-47	5.42083e-56	6.32136e-43	5.54963e-46	6.36582e-26	1.23805e-52	1.1196e-37	7.46674e-22	7.2348e-136	2.86895e-123	2.68175e-27	2.0674e-38	2.49562e-33	3.1027e-45	1.22354e-35	1.9713e-124				1.12094e-31	4.45226e-41	2.50213e-24	1.90611e-37	6.34911e-34	5.6044e-67	7.47218e-48	2.13881e-235	1.0118e-26	4.56367e-53	1.94598e-60	4.47789e-122	2.44026e-67	1.15895e-56	4.36591e-28	2.27507e-47	4.58334e-50	1.08849e-78	1.06978e-143	2.86278e-78	2.75617e-20	3.90723e-66	2.88935e-38	8.61237e-86	1.08222e-68	4.48531e-29	5.32869e-84
AC012531.25	0.227016	0.287183	0.0691511	0.398483	0.192976	0.296874	0.369738	0.186353	0.196022	0.367301	0.458399	0.348053		0.0481299		0.226912	0.539907	0.214734	0.693301	0.55127	0.705782		0.028307	0.014801	0.0962887	0.0526767	0.0861123	1.33663	1.1217	1.628	0.0926249	0.0882212	0.146168	0.0972912	0.168793	0.0967577	0.370395	0.0704449	0.317527	0.399302	0.283521	0.177718	0.340515	0.322947	0.25933	0.294326	0.431137	0.220535
AC012615.1	1.72057	1.03991	1.73145	2.22249	2.54649	1.33936	1.30422	0.000149503	0.644225	4.16382	1.42894e-05	1.13247	4.16705e-23	6.09698e-05	0.000220567	5.00296e-12	2.25085e-05	6.46081	0.874676	3.83374	2.03884e-35	2.07045	4.81683	2.60407	5.49547	3.2382	3.74116	2.74507	4.43269	2.96537	0.576684	0.657493	1.32078e-09	5.99217e-10	1.46903e-11	2.02861e-07	2.50219e-13	3.58739	1.13541	1.12247	4.21874	1.54201	0.922181	1.72806	0.961881	1.52755	0.567217	2.50699e-08
AC013394.2	31.2467	33.7896	27.1307	24.6658	20.1425	21.1774	18.7418	18.5079	16.4613	17.1968	12.3249	19.6406	11.803	10.0658	11.2059	35.5096	34.2741	31.4844	30.2241	29.7539	28.3495	28.8993	30.8013	38.4267	16.9386	17.7834	19.1736	19.7285	16.6304	17.6291	15.8688	17.6367	16.4845	29.1772	21.4758	26.0984	13.2005	12.2629	19.6795	11.4248	13.4266	15.6764	24.419	25.4399	24.8981	26.7857	29.4203	21.4312
AC013449.1	3.12678	3.72585	6.9074	2.96773	3.59055	5.19923	2.62175	7.92784	8.8882	3.49539	4.86332	3.09887	1.52101	4.58448	4.78838	7.83922	4.4564	7.34474	5.46017	10.3417	6.18352	7.44379	4.21786	5.66155	5.9333	8.02324	3.60732	5.60552	4.15958	11.2684	4.11974	7.41672	2.59611	6.76509	5.44892	3.09609	2.74735	4.65639	1.90483	3.55905	8.72571	4.40376	1.68415	3.76664	6.26301	8.78012	12.6321	9.94792
AC013470.6	1.81414	1.07046	1.17867	1.04548	0.624555	1.03213	0.999156	0.643145	0.966447	0.810721	1.00884	1.1739	0.541869	0.288671	0.471617	0.508016	0.416728	0.512486	0.352898	1.06547	0.819037	1.3087	0.914265	3.12126	1.04147	1.24923	1.1505	1.07575	0.6294	0.823186	0.135851	0.70335	0.0750344	0.143683	0.0787865	0.124145	0.811586	0.685528	1.2906	0.454245	0.616997	0.768697	1.29769	0.490755	1.37396	0.189635	0.461803	0.282725
AC015849.14	0.380984	0.241517	0.3818	0.168069	0.270626		0.495123	0.348123	0.880595	0.0928985	0.171291	0.146632		0.17228	0.099973	0.16751	0.58346	0.082196	0.0777995	0.333882		0.243183	0.156824	0.257491	0.162994	0.151313	0.159548	0.316493		0.0875675	0.070362	0.081787	0.077694	0.385414	0.408051	0.171153	0.080114	0.52511		0.178006	0.165687	0.0870375	0.169928		0.0824455	0.240545	0.62844	0.87251
AC015849.16	0.139738	0.0950035	0.0803425				0.013184	0.0468753	0.030407	0.170237	0.173828	1.33858	0.0524655	0.0784115	0.223483	0.0281185	0.0358908	0.0249893	0.157137	0.0106826	0.0626195	0.01647	0.0361708	0.0240097	0.0159235	0.0305359	0.006667	0.677655	0.518985	0.229738	0.0092435	0.0239066	0.0102107	0.0129153	0.0107186	0.0187769	0.0396875	0.0325392	0.02107	0.03339	0.0728	0.0864675	0.161906	0.0614865	0.102921	0.088972	0.14023	0.0898995
AC016292.3	23.8772	20.4922	22.9887	5.19353	7.18109	3.84291	12.8704	13.626	13.8261	24.1988	16.0489	26.1338	9.88656	14.4773	9.01342	18.8854	21.4611	28.0018	24.2432	22.0937	29.1862	29.3099	27.6381	32.7386	18.9866	16.2633	14.4293	20.8525	11.603	10.2886	19.4216	19.353	15.3603	7.85623	8.17338	10.0027	10.0736	8.27802	7.85744	19.7019	26.413	23.7314	7.93957	5.76074	8.81461	43.4503	53.868	26.0797
AC016586.1			0.0756646	0.037725	0.0440163	0.0608672	0.0194845	0.0425029	0.0446433	0.0875322	0.0418228	0.183039	0.0661967		0.0500204	0.268993	0.231882	0.146686	0.0789449	0.0209338		0.0194462			0.0377228		0.0392715	0.117929		0.067381	0.144577	0.0402326	0.11978	0.342237	0.14671	0.0220238			0.0413762	0.196662	0.102064	0.0441521	0.0634934	0.120347	0.0416944	0.241421	0.0957884	0.050188
AC016629.8	0.0158838		0.108168	0.379478	0.0843434	0.25162	0.10331	0.421744	0.428277	0.268069	1.16201	0.547397	0.0338389	0.411284	0.0767446	1.42875	0.458478	0.361018	0.369643	0.120957	0.158598	1.00962	0.886546	0.729828	0.457608	0.110524	0.353626	0.180894	0.379768	0.327654	0.235896	0.431837	0.680238	0.63751	0.867306	0.623415	0.422488	0.683406	0.190321	0.0837665	0.148357	0.419081	0.217903	0.138554	0.0959913	0.0926075	0.746309	0.551171
AC016708.2	2.47192	5.1698	2.53986	6.86072	9.44185	5.85319	2.51814	3.66887	0.924396	8.11116	2.12823	5.09222	18.2227	5.10277	9.7346	2.25627	1.46176	1.15568	6.25911	5.66847	6.12066	7.17991	4.76492	0.171662	5.5852	2.99993	8.51048	2.39448	1.36294	0.166881	2.11326	3.64381	6.41393	7.40181	5.595	2.54848	7.11864	4.76927	4.07591	8.61068	0.840195	5.08068	2.33759	1.61157	1.37489	1.82931	3.27084	5.35171
AC016716.1	10.8793	4.82084	7.03347	12.7606	7.88932	8.83149	2.41014	4.51735	3.54657	4.2834	4.36596	4.46281	9.51373	11.5312	11.8909	1.29668	1.47115	0.567267	5.19834	8.55674	5.12252	7.0179	6.90447	4.53742	6.83062	4.80666	6.39971	5.68403	2.97685	3.11756	4.3184	5.13349	3.46243	1.78934	2.66694	2.62981	6.30024	7.22273	6.90944	1.62959	2.00065	2.65081	5.53487	4.58299	6.38863	2.66337	3.97772	2.70091
AC016732.2	1.5098	0.624002	1.22515	0.955861	1.0763	1.05985	0.402406	0.0865424	0.715388	0.271488	1.19312	0.738393	0.357825	0.701157	0.302354	0.419105	0.591453	0.418837	0.790266	0.337051	1.09529	0.399047	0.0784764	0.16776	1.02175	1.41081	0.31903	0.714926	0.868067	0.358014	0.431918	0.163386	0.0795221	0.385578	0.918798	0.613716	0.476931	0.658162	0.672692	0.443583	0.57941	2.20991	1.02514		0.167208	0.809977	1.02741	0.897141
AC016734.2	96.8058	85.3606	89.3098	121.572	105.3	105.463	41.4228	51.0076	44.2617	126.468	88.9905	97.3865	29.3676	27.3288	24.215	11.6408	11.9497	13.8168	70.6457	64.4709	55.8827	106.985	101.068	77.4693	212.457	167.42	165.416	55.666	53.8257	42.2283	46.6407	40.5513	43.2087	14.9449	19.8266	11.1401	95.3755	126.496	116.458	31.4197	35.2173	34.0119	33.7475	22.1813	31.8097	88.6744	85.6642	59.9825
AC016739.2	122.665	303.625	348.749	68.5817	217.85	250.828	797.098	1124.84	889.469	503.864	401.053	345.705	429.731	423.055	365.589	116.397	101.068	115.13	317.264	291.693	231.214	255.766	169.919	156.512	124.905	115.283	254.169	88.0561	122.133	251.077	350.773	346.927	343.513	360.982	361.217	384.461	370.574	232.927	100.07	241.517	180.313	175.86	35.8677	21.0771	136.585	261.897	453.083	580.435
AC016747.3	2.9586	3.09577	2.84311			0.079207				3.6492	3.46552	2.9609	1.35285	1.17331	1.60981	2.92421	2.33816	3.10689	4.97949	4.72217	6.52285	5.73585	6.36109	5.81571	4.08188	3.96516	2.61309	8.27354	4.92734	7.85402	3.00468	2.21417	1.45637	1.39075	1.43169	1.58311	11.8462	13.5922	13.3612	0.82809	0.891945	0.603439	2.56054	1.89549	2.73499	15.5446	10.4403	9.60615
AC016773.1	0.0884852	0.345104	0.390113	0.107766	0.343435	0.298112	0.138118	0.317191	0.318506	0.277329	0.252156	0.017386	0.384325	0.40156	0.357174	0.69318	0.405314	0.144424	0.0561852	0.0195548	0.0818241	0.110221	0.055094	0.0729543	0.173561	0.115045	0.325713	0.074527	0.311913	0.132047	0.0514351	0.114779	0.111726	0.421822	0.269318	0.110229	0.180022	0.0364583	0.0293561	0.248976	0.0584309	1.41135e-169	0.240497	0.150491	0.60355	0.147267	0.217967	0.118546
AC017002.2	2.64501	2.2041	1.768	0.821827	1.34561	1.7163	2.01084	0.271831	0.879574	4.58273	6.14501	3.67316	0.813187	0.523797	0.211931	0.0293153	0.118702	0.206162	0.80523	1.6545	0.964642	0.777473	0.603667	0.989163	2.147	2.06422	1.97836	1.1123	1.38488	1.92195	1.36864	0.456683	1.76388	0.727839	0.411635	0.432262	1.35872	1.7776	2.23204	0.402997	1.2443	0.434819	4.86704	4.85312	4.33503	0.511155	0.362873
AC018462.3	0.442014	9.38384e-62	0.380259	0.340695	0.184536	0.168724	1.57115	0.278558	0.869844	0.0598146	0.869488	0.312618	0.62731	0.377142	8.86936e-07	0.278749	0.185794	0.27961	0.0252637	0.14699	4.25601e-47	0.987477	5.66289e-45	0.162125	0.670782	1.17058e-55	2.24762e-81	9.22798e-82	2.00496e-61	0.357683	1.1679e-146	4.5393e-152	0.385393	0.909104	0.189204	0.993312	0.00481811	1.35993	0.166478	1.02632	0.491529	0.205877	0.391415	0.846134	4.54463e-08	0.538255	0.0501749	3.12139e-05
AC018463.4	2.21723	2.56559	3.00596	1.7922	2.18902	2.21888	1.78522	1.98915	1.36715	5.96943	7.04558	7.9837	2.12928	1.24391	2.47224	3.22477	1.98401	2.22942	1.80394	1.83512	5.65041	1.51309	2.52536	2.21681	2.49773	3.25864	1.82654	2.73493	2.9259	3.598	2.35067	1.70013	3.61242	0.756159	0.751288	0.974048	5.45201	2.67926	6.41398	3.15567	3.33807	3.16386	4.5653	3.6663	5.87873	0.358141	0.542459	0.509919
AC018755.2	0.160553	1.47236e-31	0.497199	8.71072e-05	3.29778e-05	0.196688	0.892728	0.00072043	0.145258	0.306981	1.02906e-23	0.131004			0.178916	0.148377	0.0501435		0.328478	0.648603		0.263981	0.070678	3.46164e-33	0.410976	0.17372	0.51692	0.358914	0.26609	1.14173	0.152195	0.000716537	0.142035	0.0396305	1.70771e-18	0.313343	0.240279	4.35186e-11	0.495258	0.209135	0.488145	0.272893	1.0137	0.416704	0.263201	0.138419	0.30923	0.108153
AC018766.5	0.0834931			0.104004	0.466891	0.154001	0.360062	0.712369	0.445845	0.117189	0.511768	0.0947164	0.150214	0.248426	0.285507	0.345053	0.296071	0.316588	0.0746585	0.215999		0.103045			0.148061	0.252765	0.225808	0.251955	0.969903	0.317226	0.527228	0.274713	0.15031	0.655055	0.615958	0.248589	0.307126	0.077371	0.317402	0.251181	0.390623	0.668082	0.161317	1.21743	0.315896	1.14735	0.441446	0.282684
AC018804.7	0.6134	0.72125	0.829988	1.51799	3.09333	3.01664	0.610243	1.46499	1.43965	1.40005	1.17942	0.803219	1.68928	1.94395	1.25434	1.50077	0.88749	0.948014	0.883977	0.974943	0.226177	1.34019	1.19616	0.30852	1.02925	1.16232	1.5647	0.554431	0.704201	1.46899	2.72023	2.23339	2.37886	6.08739	4.77942	3.52569	1.63199	1.15909	1.24102	2.11301	1.75447	1.5326	0.550416	0.395291	0.522865	0.432448	0.907515	0.831954
AC019097.7	8.77728	8.22981	7.82566	13.7773	12.9211	9.12093	35.1674	29.5141	32.638	14.5796	12.9767	13.5484	11.2628	14.6964	10.5816	8.33632	9.41696	9.26239	16.39	14.3878	16.5244	11.2699	11.8138	13.6664	14.1163	15.4181	13.0222	7.17738	7.20782	6.01376	13.7871	16.0211	12.5405	6.05027	5.03948	6.653	7.60965	8.80702	8.74294	3.15611	4.75745	4.52273	10.2933	9.79447	8.17171	5.10303	6.48182	3.46401
AC019221.4	0.367464	1.10998	1.97599e-212	0.167708	7.46678e-107		0.3651	2.50232e-77	6.40809e-32	0.156826	1.30923	1.42791e-160	1.1288e-189	6.9329e-52	4.32354e-80	3.60833e-45	1.13848e-38	0.189601	0.323517	1.17461e-62	0.553407			0.114777	1.0449e-23	0.466374	5.4699e-128	1.87218e-33	8.7621e-23		0.227593	3.66772e-155	0.387176	0.156676	4.32648e-65	8.18579e-08	0.280268	0.5775	5.71983e-103	0.216073	5.04385e-72	6.06125e-11	0.193851	1.25981e-81	0.247537	1.47086e-46	3.13327e-68	1.64731e-21
AC020663.1	6.08223e-68	4.46323e-57	9.32148e-57	5.14938e-45	1.70075e-55	5.89279e-68	1.31043e-116	3.00412e-45	2.41667e-96	6.04353e-75	2.51251e-70	8.37715e-31	8.04249e-62	2.4215e-60	1.69205e-38	5.72096e-158			2.36539e-47	1.18666e-49	1.15617e-125	1.23446e-51	1.15767e-32	3.41288e-34	6.85488e-39	1.13117e-10	1.13626e-30	2.96471e-51	6.71886e-50	9.10377e-73	7.15804e-82	1.55071e-44	3.98563e-100	3.34453e-84	1.26491e-248	1.66456e-42	5.47185e-71	2.43088e-33	3.09967e-156		2.62676e-123	9.34052e-99	7.28877e-17	2.8218e-06	8.61899e-39	2.31551e-27	4.89411e-31	1.44646e-64
AC020910.2	0.96331	0.892415	1.25021	0.136317	0.18991	0.291203	0.0842267	0.27504	0.384283	0.946109	0.781934	1.07772	0.285395	0.471563	0.107734	0.862253	1.08881	0.480861	0.141562	0.180319	0.16444	1.1478	0.945965	1.54917	0.326536	0.493607	0.536301	0.988174	0.817998	0.611759	0.41449	0.578326	0.372017	0.710466	0.60091	1.01015	3.92583	3.89143	4.43153	0.0628184	0.0293361	0.126676	0.303964	0.316504	0.358954	0.866503	0.587781	1.04275
AC020922.1				0.0541589	2.41894e-26	0.0565816	0.11537	0.20185	0.0868411	0.0884379	6.54127e-24	2.13631e-65	1.51295e-72	1.96262e-217	2.18048e-110	6.26693e-101	0.0981248	0.813642	0.144029	0.233757		0.117373		8.7425e-114	2.20903e-26	1.02163e-68	3.80748e-150	0.220003	0.219148	0.376877	0.282158	0.0646518	4.99314e-51	0.289151	0.20873	0.645583	0.0686274	0.0740054	0.174168	0.0713987	0.343401	2.97988e-22	0.0591806	0.111628	0.11614	0.11234	0.359599	3.61236e-73
AC021593.1	0.626999	0.927787	0.298525	0.0813836	0.207352	0.079199	1.24186	0.0134635	0.299148	0.262366	0.60239	0.499081	0.13976	0.950585	0.514483	0.461121	1.07433	0.703605	0.533242	0.784592	0.344527	0.214438	0.34423	0.345248	0.326274	9.54217e-48	1.62675e-19	0.778201	0.416536	1.38101	0.0132345	0.129955	0.0587721	0.575513	0.476747	0.557757	1.58668	1.84689	2.55402	6.84471e-12	1.71804	0.213673				0.552996	0.184889	0.106144
AC022007.5		0.202592		1.00708	1.11786	1.77119	0.235605	0.316363	0.272874	1.39285	1.10394	0.890916	0.0298461	0.618635	0.596874	1.03511	1.19638	0.792359	0.625978	0.537673	0.740549	0.685492	0.776126	0.63198	0.583529		0.213894	0.976221	2.00658	2.88983	0.584489	0.659493	0.296427	2.02511	1.34136	0.8583	0.682784	0.341307	0.335115	0.919449	0.396838	0.446892	0.0685538	0.129911	0.465956	1.48108	0.665332	1.61495
AC022182.2	0.0577783			0.279583	0.173442	0.301078	0.460514	0.354666	0.383025	0.0608458	0.232657	0.118822	0.368293	0.599782	0.429098	0.0767486	0.293284	0.145782	0.256287	0.397998	0.510929	0.216319	0.107715	0.187978	0.279653	0.183924	0.418756	0.209607	0.309903	0.145847	0.31015	0.223829	0.203711	0.105781	0.0583267	0.0817235	0.189803	0.134431	0.51792	0.15196	0.227135	0.307147	0.157017	0.111628	0.222364	0.130608	0.0253933
AC022431.1	682.272	455.863	385.987	482.357	424.429	313.934	180.965	190.792	196.746	407.248	366.911	348.351	278.166	264.288	305.345	116.714	138.965	109.329	254.275	207.628	188.279	371.227	428.003	423.141	360.642	405.225	321.284	95.6603	86.1276	78.7509	97.8399	69.9506	79.5863	263.223	292.866	282.903	532.197	537.156	678.087	170.719	265.076	232.385	401.513	201.92	322.579	374.543	422.615	302.26
AC022498.1	0.237621	0.0329923	0.249913	0.199041	0.213171	0.0893763	0.548737	0.430407	0.295025	0.192581	0.478748	0.177361	0.291505	0.366988	0.220322	0.0911213	0.334334	0.110796	0.260859	0.387283	0.0606781	0.205423	0.23872	0.196338	0.431447	0.412813	0.380432	0.294314	0.329025	0.277126	0.398191	0.106294	0.510236	0.284665	0.295539	0.271751	0.274683	0.340247	0.182186	0.365634	0.233711	0.719737	0.615226	1.18417	1.01026	0.531707	0.289538	0.353898
AC022532.1		0.0451544	0.0682136	0.0909432		0.121881	0.164165	0.0766652	0.160877	0.105364	0.10059	0.175975	0.716209	0.552845	0.300541	0.223861	0.0759673		0.0474128						0.0227151	0.282187	0.283299	0.188987	0.23613		0.1519	0.120928	0.191767	0.114287	0.0755003	0.0264438	0.0234471	0.0700051	0.049749	0.0788137	0.343554	0.106068	0.178049	0.0963699	0.050087	0.145046	0.246333	0.150629
AC024560.3	7.157	7.317	5.29331	5.12989	3.73808	3.57506	4.56731	4.10395	3.31257	4.61089	5.66858	4.031	3.93933	5.23682	4.4246	4.5222	4.39879	4.97599	5.12946	7.02536	3.83588	30.0438	26.329	29.0302	8.61848	6.90615	9.6082	6.07877	6.96997	6.78743	4.7778	4.78952	3.46549	8.99896	5.74186	5.88054	10.5665	10.0576	11.456	7.61143	8.19251	6.56986	7.00082	4.58455	5.77734	23.013	22.8203	22.3194
AC024592.12	1.52572e-08	0.432262	0.137319	0.440066	0.0806158	1.33462	0.899955	0.155511	0.156773	0.327692	0.306443	0.130811	3.30858	0.997129	0.716511	0.601073	0.441619	0.152064	0.417554	0.790205	3.8038e-07	1.26262e-18	1.00178e-14	0.161503	0.288866	1.7976e-13	0.758721	3.4079e-12	3.6212e-07	5.26299e-07	4.10984e-08	6.75645e-07	0.137754	0.515597	0.880777	1.62795e-06	0.852939	1.27577e-13	3.62545e-06	0.556887	3.14452e-11	5.63191e-06	0.000384247	1.1528e-05	2.89946e-06	2.20488e-17	0.284766	1.71769
AC024937.4	1.03011	0.470342	0.44967	0.440742	0.332674	0.335873	0.23867	0.318623	0.294582	0.151525	0.192543	0.376141	0.152004	0.423876	0.308136	0.148088	0.0988303	0.113183	0.216237	0.324174	0.214737	0.267022	0.437203	0.510468	0.559841	0.367755	0.473078	0.271164	0.158543	0.237736	0.0824335	0.106691	0.149387	0.113906	0.172478	0.0945337	0.123395	0.0838982	0.322423	0.0857684	0.0464677	0.248465	0.193118	0.272443	0.262124	0.330209	0.175459	0.148768
AC024937.6	0.960681	0.634283	0.390205	0.509251	0.246865	0.411656	0.317836	0.382348	0.224602	0.230581	0.236446	0.321389	0.218093	0.446771	0.27448	0.185265	0.0736506	0.210107	0.269266	0.346077	0.187382	0.351744	0.503885	0.333392	0.485879	0.378604	0.467194	0.235871	0.275981	0.231039	0.133618	0.106691	0.146411	0.113906	0.231845	0.107663	0.100003	0.0838982	0.117808	0.15124	0.141237	0.189149	0.19945	0.248492	0.296368	0.354268	0.185636	0.148768
AC025171.1	0.37752	0.518491	0.716273	1.92933	0.624527	0.822543	0.615585	0.454812	0.878641	0.177404	0.34247	0.157869	0.851027	1.152	0.682285	1.14195	0.873672	0.639823	0.24112	0.0813115	0.126133	1.2998	0.942369	1.29193	0.0812195	0.344586	0.254941	0.576547	0.382554	0.538567	0.310682	0.536845	0.311158	1.43886	1.61356	2.15634	0.504517	0.544256	0.454697	0.412869	0.0413743	0.166411	0.351414	0.618089	0.172534	0.295006	0.321456	1.11755
AC025335.1	1.67989	2.58238	2.55151	2.12611	1.5779	1.48778	2.06309	1.88809	1.89845	1.72061	1.41778	1.6416	0.567675	1.09474	0.585192	0.483965	0.740144	0.53966	1.04721	0.849077	1.21823	0.333231	0.407529	0.710512	0.36689	0.280947	0.321424	0.674358	0.552012	0.227916	0.733571	0.705631	0.389583	0.90415	0.817983	0.96278	0.698908	0.947264	0.516013	0.476937	0.0477404	0.223937	1.30389	1.31472	0.878324	1.23968	1.0795	1.35187
AC026271.5	122.45	99.8807	96.9288	71.9674	50.56	54.6992	52.8573	50.6795	49.2198	57.5584	58.1383	68.8092	59.9197	68.512	61.5641	29.9379	25.2246	33.8335	40.8927	38.8717	44.4374	96.6634	103.683	118.127	166.787	177.221	137.248	54.0094	54.7648	47.2905	33.0761	35.8528	25.8444	26.7749	29.3065	33.2119	68.5391	85.2465	101.457	20.3056	23.4729	23.7464	37.3306	31.4362	34.1207	50.9	47.6635	42.7359
AC026703.1	0.00636282	1.49994e-10	0.0316258	0.50574	0.254248	3.58638e-28			0.0302443	0.0018233	0.0101662	0.0431622	8.0126	8.55446	6.94759	4.72311e-27	0.00232408		4.33457	5.06599	4.58925	0.0041294	0.0133458	0.0182863	0.140987	3.75503e-08	0.118998	1.1899	0.492262	1.2254	4.7574	5.55602	5.61545	0.168112	0.503538	0.55404	2.88227	4.01034	3.37716	0.0656046	3.35697	1.12699	4.78406e-06	4.71172e-09	0.120671	1.82772	1.45513	0.391052
AC026806.2	1.13016	2.07547	1.41817	0.594957	1.04958	0.745696		1.2156	1.01859	0.435358		1.01992	0.415567	0.1992	0.463493	10.901	7.1435	18.9873	0.360091	0.967232	0.820863	1.13576	0.364296	3.00801	4.02084	4.06314	5.37134	0.918953	1.26235	0.606996	3.24835	4.75157	1.43418	4.83469	2.82374	8.48853	1.86741		0.391086	1.24415	0.578313	1.20908	0.197292	2.01041	1.7185	3.71307	4.22106	4.46651
AC027307.3	0.177876	0.158903	0.119071	0.200888	0.277742	0.169832	0.123538	0.178746	0.513264	0.0462683	0.263902	0.230149	0.416915	0.732599	0.576309	0.390847	0.264441	0.087539	0.0824969			0.0410047	0.325141	0.34307	0.239924	0.0380768	0.495014	0.370952	0.123357	0.609179	0.150796		0.0832889	0.319377	0.306098	0.22966	0.451156	0.0826319	0.086944	0.321287	0.214286	0.276833	0.221811	0.503013	0.653922	0.547695	0.284623
AC027612.1	7.99027	6.95973	6.58484	6.0129	6.81763	3.64532	5.56293	4.60206	4.17971	5.0648	6.0085	5.83086	4.54728	5.02881	3.0737	7.99279	7.77869	12.8113	5.05843	3.97421	4.89641	6.063	7.56717	5.6332	4.22925	3.84198	3.71954	8.42057	7.45516	5.2707	4.11963	5.86195	4.1512	2.21504	2.40095	1.71384	4.92445	4.48422	4.73172	5.28941	3.79545	4.1329	2.65014	2.72667	4.74215	4.85332	3.70062	4.01362
AC027612.6	11.8513	9.18993	7.71237	2.95943	1.80469	0.684746	7.17782	7.90347	8.88331	6.47397	5.95285	7.10142				2.06165	1.41043	0.784044	5.09868	5.09498	2.88104				2.57692	1.63602	1.5499	15.502	13.7643	10.5752	1.91642	1.06453	1.49681	5.77551	4.45995	6.65212	10.5827	12.7183	12.8428	0.953719	0.389732	7.89442		0.713709	0.199023	2.11694	1.74269	1.46933
AC027763.2	0.753384	0.250418	2.05948	6.11491	5.80668	5.77461	1.69288	0.8986	1.25562	3.23953	3.10425	2.93325	1.9505	1.21009	2.12125	2.91876	0.893922	1.31175	4.55149	2.90575	3.05787	4.95084	4.4084	2.81915	0.955043	0.716926	1.24832	3.82472	0.953082	0.580247	0.925254	1.41253	1.29779	2.98975	2.77257	1.25333	3.78057	3.70497	2.60391	0.453948	0.453683	0.783362	1.54172	2.34025	1.83933	2.85085	3.29666	2.36524
AC034102.1	1.52079e-34	1.14675e-20	2.21701e-30	1.25418e-06	2.65875e-18	9.41115e-24	1.5198e-41	9.80331e-13	3.16987e-24	6.60076e-18	1.61639e-24	8.97501e-10	2.71224e-50	3.76936e-50	3.60477e-15	5.9772e-14	0.000263553	2.72546e-16	0.000677152	7.01867e-34	5.952e-15	1.37485e-14	5.38551e-20	1.90457e-15	1.0335e-21	5.15361e-10	1.0104e-27	1.25775e-22	9.17811e-12	3.23459e-17	1.17682e-13	5.45429e-23	5.77108e-24	6.07209e-53	2.52196e-68	9.72148e-66	1.71862e-12	2.8052e-21	4.86734e-15	0.000294309	2.18939e-07	8.01656e-28	1.04939e-51	5.59122e-09	1.00908	1.45599e-16	1.13806e-28	1.33305e-26
AC034220.3	2.93555	3.71456	1.57881	0.179677			2.839	1.42316	0.717435	0.902763	0.0780326	0.494675	0.327826		0.277191	1.49778	1.86174	2.69563	0.435004	0.231779	0.167596	4.36212	4.8881	2.72173	1.7453	0.959726	1.2933	1.92144	1.30278	2.75722	1.04719	1.53957	1.46996	2.14846	0.584999	0.666481	1.08371	0.44665	0.650213	1.07724	0.482506	0.758687	3.91975	2.23172	4.2659	0.997778	1.53684	1.62884
AC037459.4	0.147046	6.66758e-37	2.91852e-44	0.173908	2.16472	5.28425	1.6126	2.96378	2.58249	0.265193	0.519103	1.3023e-141	4.05828e-26	3.69867e-110	7.04896e-57	2.11681	1.63497e-09	1.55528	1.85259e-15	0.492185	0.299759	1.79681e-98		0.135181		1.48592e-66	4.9507e-154	0.0247092	2.17566e-43	0.896138		0.000724241	0.842449	1.39777	0.619884	2.79209e-48	4.58105	0.786105	8.33797e-109	1.81459		0.513701			3.11e-155	0.0484014	3.93593e-26	9.50198e-17
AC040173.1	2.29891	6.23562e-12	0.971997	2.08273	1.10271	0.396111	0.370052	1.26728	3.39557	1.38442e-12	7.67109e-08	1.14648	1.78609	1.95945	1.36096	0.000324683	8.44891e-30	2.09423	3.58312	3.9936	3.84732	2.98248	2.02944	4.24056	2.12819	3.74778	2.3245	2.44229	1.73268	3.71435	6.03372	8.5562	6.94939	0.897433	1.47681	5.98683	2.89115	2.59613	3.48243	1.04815e-06	7.56835e-08	0.565275	0.46336	0.660424	1.41629	3.97676	2.13797	5.07538
AC046143.3	0.369267	0.422777	0.187104	0.142789	0.109199	0.399939	0.194605	0.052703	0.10984	0.218686	0.311273	0.316308	0.327624	0.10776	0.678817	0.20474	0.0518785		0.242736	0.567866	0.168792	1.67003	1.19765	0.709418	0.236469	0.584568	0.389087	0.097131	0.145233	0.110238	0.266046	0.199285	0.930656	0.470604	0.0514361	0.702268	1.45136	1.46955	1.02517				0.31358		0.0513184
AC060834.2	2.55907	2.70308	2.46302	0.0376402				0.0326562		0.440694	0.3234	0.0913136	4.11694	3.80506	2.3926	0.666483	0.473258	0.671448	0.575403	0.658724	0.389245	1.27366	1.79012	1.49662	0.639799	0.165079	0.21551	0.0904889		0.0343822	0.144571	0.154486	0.182095	0.233571	0.0418246	0.0219745	0.64195	0.670259	0.476703	0.773739	0.313443	0.154191	0.097417	0.0200129	0.257049	6.20636	6.61062	5.30837
AC062029.1	0.429869	0.426107	0.231141	0.19084	0.287446	0.177936	0.2755	0.133137	0.146417	0.368905	0.305578	0.335797	0.115018	0.114245	0.0522668	0.699156	0.707512	0.793072	0.620934	0.546993	0.296257	1.16034	0.851613	1.25932	0.134449	0.36386	0.404044	0.645325	0.581369	0.620224	0.970667	1.61459	1.24075	0.673612	1.13551	0.745015	0.47208	0.835429	0.877155	0.176247	0.316797	0.0854026	0.752905	0.462073	0.226689	0.436083	0.359557	0.326764
AC064850.4	0.293079	0.0876769	0.205397	0.17688	0.0341803	0.0942901	0.849342	0.264004	0.725753	0.579274	0.162385	0.51075	0.23966	0.135699	0.232582	0.385211	0.0979219	0.227018	0.274986		0.212896	0.120958	0.0901173	0.031582	0.499961	1.26293	0.213343	0.365755	0.273989	0.104222	0.279511	0.187333		0.973609	0.778044	0.306532	0.454235	0.302795	0.160573	0.0678272	0.475106	0.136706	1.5094	0.807323	0.774793	0.28059	0.1902	0.0775838
AC068134.10	0.118039		0.0967665	7.15524e-113	0.294349	0.134224	0.283705	0.455999	0.220995	0.175569	0.530677	0.303638	0.285619	1.41277e-120		0.137738	1.32231	0.276163	0.422117	0.0693337	0.677845	0.261479	0.233325	0.342697	0.192414	0.268395		0.917069	0.862269	1.84875		0.147307	0.156514	1.14006	0.454234		0.270352	0.0835728	3.7315e-166	0.788762	0.866189	0.835389	1.70101e-51	2.76574e-120	0.0688542	0.0666463	0.0446879	0.411396
AC068533.7	1.84644	4.39862e-05	0.290786	0.729741	5.47761e-06	2.91303e-36	2.83118e-06	0.446333	1.33947	6.58754e-15	4.74237e-21	1.22883e-11	0.95602	0.804448	1.97555e-11	0.357694	0.621178	4.24779	1.32719	1.03281	4.69676	1.70217	3.75949	1.22082	5.69572	3.5883	9.0122e-06	1.02473	0.368693	6.34881e-08	1.11203	0.708959	2.12408	1.55959	0.242473	4.63679e-10	0.302562	3.24004	4.30154	1.1531	6.47545	1.39075	1.45595	0.369784	3.61393e-05	0.932485	1.10396	2.71535
AC068657.2	7.09858	1.1725	0.51259	3.27672	1.23883	1.58379		3.61224	1.72666		2.93127	1.93759	1.24337	5.64534	2.00809		1.11706	0.526102	7.26995	2.78012	2.773	2.34688	1.05495	0.586935	1.85083		0.529535	1.65501		2.28953	4.52013	3.34553	3.93254	1.05374	0.516387	1.08929	2.87675	9.72803	1.67065	1.9039			0.600561	0.528698	5.0111		2.62122	2.43753
AC069278.4	2.21704	2.76588	3.19415	0.687075	0.155709	1.06412	0.696947	0.9767	1.01209	2.82063	2.29324	2.18308	0.777212	0.915953	0.964208	1.01969	1.39753	1.67799	1.23853	0.6597	0.31825	0.899486	0.340919	0.871465	1.63095	1.80153	1.80107	0.828634	1.03017	0.389969	0.627339	0.993374	0.415804	0.46896	0.291139	0.993367	0.551946	0.850527	0.730233	0.924708	1.00677	0.692688	0.742782	0.419506	0.800509	0.281829	0.188753	0.260734
AC069287.1	8.54768e-05	3.46506	0.00131394	1.21778e-09	0.00238481	1.12149	3.13985e-81	2.12827e-10	1.02298e-12	1.37108e-06	5.13478e-07	9.55831e-06	4.20635e-07	6.36745e-05	0.00094401	6.07515e-09	2.21986e-18	1.0266e-13	1.65236e-11	0.000106201	1.63662e-13	0.648213	9.0289e-05	0.848238	1.11779	6.17664e-05	6.49547e-12	1.41461	1.09228	0.00289537	1.44727e-07	2.57938e-05	1.73928e-21	3.16515e-17	6.56762e-06	2.00144e-06	8.82162e-06	0.344135	1.0734	3.1032e-05	1.41319e-12	3.06945e-11	2.87397e-09	1.00105	0.387123	2.68936	4.71363e-15	5.10032e-20
AC069368.3	2.01264e-13	0.042605	6.92899e-53	0.359523	2.34626e-17	0.403451	1.00231e-135	9.09447e-06	1.36889	0.000182715	1.09959e-19	1.1583	0.296137	0.0126932	0.420484			4.71841e-06	0.000318436	1.12387	2.39704	9.67729e-83	0.255486	9.31185e-21	0.474205	1.46663	2.7344e-53	0.447169	1.89784e-49	0.0165514	7.31408e-41	1.22043e-14	8.07157e-68	2.2014e-09	0.732996	7.86939e-07	1.17486e-11	0.838161	8.80058e-16	0.00471717	1.15726	8.65568e-28	0.00150644	2.17092e-06	0.597181	6.94453e-48	0.000143563	5.45586e-66
AC072062.1	0.655144	0.726444	0.470503	0.890538	1.82101	0.521881	2.07338	0.592374	0.550199	2.2353	0.832078	1.86722	1.59785	0.540253	1.13264	0.177447	0.0903661	0.0898246	2.80517	0.897477	4.09292	0.722063	0.166033	0.609053	0.668226	0.0580314		2.67117	1.58373	0.633344	2.79467	1.59971	2.86355	0.997903	0.80566	0.997463	0.104516	0.602289	0.155277	0.25772	0.370925	0.354874	0.567141	0.64486	0.51772	0.388138	1.04356	0.855371
AC073043.1	0.898687	3.53108	1.03969			0.0610866	0.20002	0.37186	0.721047	0.19329	1.35374	0.692823	1.34733	1.54982	1.67741	0.0504804	0.462294	0.863678	0.332769	1.45454	0.55058	2.05588	0.570964	0.421681		0.16185		0.20661	0.0746977	0.186467	0.403528			0.716764	0.350345	0.159862	2.2992	0.690907	1.25108	0.167817	0.049823	0.309407	1.27673	2.12057	0.627051
AC073046.25	4.56336	10.0243	5.57733	1.12817	0.866101	0.506545	5.67006	2.51179	3.31897	6.40361	5.19831	2.54953	7.98706	4.86404	5.0579	9.62333	5.00168	3.33656	1.22449	4.21973	1.38014	2.10338	0.499004	2.4993	1.07884	3.18245	5.82265	2.27162	2.7018	1.6463	4.82443	1.56375	2.8996	8.33959	7.35061	6.11754	2.58459	4.43178	3.74352	6.02735	5.05293	4.11795	2.70767	3.97285	3.6459	4.03524	3.7252	1.19948
AC073052.1	0.675727	0.297226	1.53444	0.758116	0.0855528	0.622652	0.613632	1.07319	0.683087	0.431212	0.406452	0.49333	1.19498	0.585878	1.1544	1.19974	1.04878	2.15988	1.50921	0.241305	0.348761	0.38047	0.22464	0.719435	1.27273	1.06175	1.0653	1.06133	1.58218	1.96625	0.825116	0.545581	0.455744	1.39799	2.15407	1.92618	1.36474	1.01747	0.160439	1.43892	2.13239	1.51933	2.11989	2.76036	1.11754	1.15976	0.4134	0.57138
AC073063.10	1.01258	0.489615	0.285829	2.11094	1.56583	1.41681	1.51215	3.34476	2.88337	1.24737		2.38614	1.33637	1.84666	0.37567	1.04325	0.628815	4.46388	1.17588	0.941914	3.04919	1.29679	2.73532	2.73243	1.08613	0.650272	1.39081	1.58065	1.86068	1.3297	1.51488	2.13684	0.492192	1.05614	1.86138	1.51906	0.89225	2.39327	5.34278	1.21548	1.13358	1.20569	1.91159	1.89161	1.03713	2.21335	2.2034	2.09566
AC073610.5		1.59982e-136	1.42288	8.82308e-40	6.14849e-145		1.66854e-121	6.29443e-46	2.9744e-153	2.00915e-32			1.19487e-306	0.342113	7.20098e-244	5.83026e-117		1.41721e-18	1.13149e-100	4.88071e-66		6.96476e-302	5.18831e-141	5.69566e-142	1.3608e-42	5.78651e-155		3.35037e-216	4.54221e-47	8.32059e-230	1.17014e-81	1.7283e-67	4.01611e-134	7.2184e-80	1.42988e-138	8.68425e-102	2.92541e-96	8.35355e-216	0.102449	1.60076e-187	2.25839e-75	1.77866e-254	3.19062e-45		5.29089e-90		3.19144e-275
AC073869.1	1.71035	2.27036	1.49109	2.031	2.53905	3.68504	0.415636	1.45459	1.61239	2.29615	2.967	3.08268	3.01056	3.18542	2.13382	2.272	2.66417	2.416	0.509064	1.08531	0.900242	3.22484	2.25067	2.1603	2.56124	1.9452	2.19056	3.14691	2.41515	3.83157	1.99436	2.25593	2.27253	2.58446	3.11127	3.18624	1.19567	1.68338	2.80827	1.40953	2.2388	1.12552	1.03248	1.91232	1.33467	1.88413	1.99066	1.4659
AC073869.20	0.152935	0.68915	0.555993	0.237767	1.73289	2.55546	0.286442	0.46852	0.468555	0.838743	0.658614	0.49954	1.05394	1.28826	0.735058	0.499584	0.287624	0.208931	0.517851	0.219728	0.43348	0.653371	0.223562	0.276871	0.336747	0.208346	0.824538	0.278529	0.206295	1.29642	1.21382	1.33043	1.80175	0.389207	0.439906	0.242683	0.869932	0.325274	0.0434358	1.51399	0.578569	0.54449	0.199943	0.168412	0.131283	0.147819	0.674868	0.579344
AC074117.10	0.563695	1.31893	0.701864	0.29955	0.979966	1.91671	0.599734	1.52008	1.47287	0.380849	0.478601	0.729206	0.440582	0.145445	0.445797	1.23237	1.78158	1.37004	2.66198	1.96966	2.18369	0.716471	0.0489422	1.09531	0.137546	2.94592	0.90801	0.384535	0.745647	0.800666	1.06816	1.57763	1.1959	2.00967	1.4474	1.82923	0.993502	0.983559	3.36098	1.17892	0.550395	1.24354	1.23968	0.517567	0.710987	2.52842	2.6531	1.20119
AC074138.3	1.57261	0.116164	1.94465	0.492257	0.530817	0.439785	0.563335	0.804585	0.533155	2.30211	0.80778	0.982776	1.08072	1.30708	1.89246	1.51755	1.72447	2.81065	0.783562		0.215253	1.01632	0.230058	1.23875	0.914338	1.32508	0.565875	0.912823	0.897503	0.764437	0.42173	0.383016	0.374915	0.458195	0.852904	0.482326	3.72196	0.951374	2.95605	0.807232	2.05239	0.554848	0.601851	0.748299	1.07466	2.2595	2.09259	0.944646
AC078899.1	3.98672	4.05373	4.05706	1.82045	1.74473	1.91047	2.91473	2.4961	2.65146	4.17732	3.79494	4.44463	1.8097	2.45645	2.33322	1.77554	2.26396	3.06464	3.41288	4.16352	4.19965	2.34516	3.69249	3.36588	2.86506	2.85122	2.39826	1.42323	2.11197	1.87525	2.43446	2.03454	2.31047	1.75904	1.65048	2.10979	6.49995	6.3997	8.2531	1.93884	3.27061	2.66386	1.93511	1.12434	1.70425	1.11049	1.41156	1.1655
AC079210.1	0.0546391	0.0296718	0.0100204		0.0116463	0.0322798	0.0102897	0.0112471		0.127098	0.0442634	0.0776098	0.210348	0.0465334	0.0662892	0.800062	0.805239	0.533867	0.0523625	0.0776923	0.0609477	0.0513974	0.0820297	0.0642525	0.129318	0.019062	0.18713	0.270771	0.145949	0.202758	0.0191948	0.0745561	0.0212033	0.261787	0.155811	0.280728	0.536472	0.396857	0.208091	0.17355	0.0648618	0.0702844	0.179462	0.234157	0.0995343	0.0106662	0.036381	0.0133321
AC079250.1	0.808984	5.93805	7.95482	1.04544	7.86486	6.23596	2.3354	5.65519	4.64443	8.02977	10.935	5.43165	21.949	12.6042	16.6497	3.34871	4.39103	1.44751	1.5542	1.99636	1.71413	1.79147	1.99376	1.21679	0.893044	1.19319	3.54984	0.440507	0.870594	3.22669	11.2796	7.85815	13.3312	9.06429	12.8277	9.67841	10.9066	3.18856	2.07305	5.29138	4.20805	3.05968	0.0676118	0.189444	1.7117	2.81446	3.79082	7.03616
AC079922.3	0.834681	0.733712	0.550431	0.43533	0.57416	0.447871	0.117306	0.191914	0.0223972	0.219579	0.167861	0.0550979	0.0885622	0.131959	0.125475	0.0622861	0.148061	0.231286	0.316848	0.273062		0.370738	0.116558	0.264565	0.170334	0.362	0.0591076	0.216937	0.354986	0.0901448	0.525863	0.585356	0.320492	0.114466	0.168235	0.198883	0.684716	0.93207	0.581236	0.0438512	0.184339	0.132905	0.530906	0.322012	0.313767	0.322985	0.356984	0.276966
AC083799.1	12.3321	12.7161	13.1997	5.40106	2.33933	3.94992	6.42066	6.42645	7.29061	3.18699	3.64763	3.42254	3.7177	5.08286	5.4865	7.86867	8.53775	10.9601	5.00636	4.646	5.49059	12.2914	10.1005	10.3666	5.36104	6.47661	5.55539	6.39824	5.68397	5.98413	10.3084	7.98887	9.56108	5.21977	5.18947	5.80517	2.87012	1.51189	1.63271	1.84231	1.4979	1.72763	5.73726	4.60031	3.71621	5.66364	3.3353	3.30322
AC083843.1	0.789592	0.716011	0.738088	0.541238	0.318278	0.43856	0.424249	0.414032	0.390237	0.766017	0.635692	0.709352	0.671587	0.656279	0.754871	0.67881	0.868136	0.515634	3.20513	3.19718	3.42608	0.320888	0.595002	0.32813	0.404334	0.324014	0.20299	0.47659	0.465679	0.413142	0.520136	0.64767	0.479788	0.764008	0.628009	0.823491	0.96664	1.08061	0.916443	1.66534	1.67074	1.70097	1.50874	1.66443	1.65511	0.470402	0.44747	0.201164
AC083873.4	15.9216	11.9732	10.1542	19.7258	10.4215	11.6968	19.8998	13.9774	15.2658	16.3994	14.5671	16.1903	8.30569	9.23318	6.73592	11.906	14.3386	18.6473	37.5885	36.0731	45.4797	20.4027	17.3411	20.5481	11.1533	12.8993	7.00726	10.9044	9.88704	6.5368	9.79874	9.71669	8.72431	5.14274	5.26085	5.46617	14.7074	17.5015	17.1628	7.45505	8.15968	6.45933	8.5535	7.07145	6.91063	14.7736	9.78343	10.5017
AC083899.3	4.81371	4.63453	3.73463	2.53129	1.99352	1.75635	4.50872	4.55065	5.17265	3.71868	3.51245	3.79984	2.45313	2.65677	2.49522	1.46683	1.40491	1.92493	3.69834	3.9096	3.47016	5.10232	5.10367	5.42406	4.71218	4.34733	5.08885	4.69082	4.47565	3.70341	2.65149	2.57519	2.46755	2.0312	1.80357	1.84853	2.71503	3.03529	3.04159	1.79366	2.76453	2.38801	2.64976	1.96334	2.49998	2.27361	2.07999	2.33219
AC084018.1	1.56466	1.73383	0.902179	0.911774	1.19994	2.13176	2.35839	3.0222	1.61943	1.95255	2.43008	2.35748	2.30598	1.95054	1.01846	3.38323	2.49826	3.54847	0.861305	0.794167	1.06571	0.809566	2.59359	1.41623	1.00831	0.502969	0.680354	1.95104	1.68435	1.6383	1.08899	1.01092	1.77302	7.9782	5.32138	4.73063	4.16259	2.61236	1.99255	1.80296	1.04812	1.38826	2.16895	2.26545	2.25705	1.9791	3.76636	1.57556
AC084219.4	1.55488	1.20393	1.25313	0.497142	0.595917	0.220153	0.620303	0.319713	0.403841	0.446848	0.251653	0.51833	0.212579	0.118997	0.256208	0.174443	0.305084	0.353946				0.222118	0.233154	0.365424	0.0226338	0.0975596	0.0709212	1.27443	0.663582	0.69128	0.349022	0.108988	0.0963858	0.0228952	0.0252962	0.265857	0.434047	0.382202	0.896588			0.0399424	0.0127509		0.0251409	0.0242495	0.0165348
AC087269.1	0.617648	0.353367	0.507771	0.254347	0.413851	0.244877	0.15726	0.192557	0.179544	1.59404	1.84803	2.45573	0.321665	0.6757	0.637463	0.555479	0.339137	0.645965	3.80978	3.14482	1.96728	1.85595	2.49495	2.64036	6.06979	6.51995	3.40103	6.35046	5.90371	4.32153	0.920043	0.91831	0.661135	0.556754	0.421204	0.64908	0.552078	1.2012	1.0834	0.135081	0.438439	0.406611	2.32856	1.96278	2.62739	0.863542	0.641064	0.87382
AC087294.2	0.250814	0.112147	0.560843	0.642346	0.523141	0.640135	0.542655	0.126258	0.263842	0.391941	1.63304	0.680684	0.218179	0.474697	0.641725	0.122726	0.498418	0.412528	0.233245	0.157816	0.16858	0.423099	1.11025	0.686821	1.05352	0.071691	0.116563	0.349469	1.02314	0.0883422	0.479664	0.398028	0.078511	0.672082	0.577067	0.930299	0.463507	0.155381	0.359032	0.432323	0.322959	0.565279	0.919493	2.03384	0.854345		0.161029	0.18368
AC090425.1	7.3094e-09	1.19368e-34	0.000592027	3.32151e-47	2.68527e-29	1.90928e-08	1.44602e-96	8.73738e-15	1.50666e-19	3.27432e-28	9.33602e-11	2.75363e-11	6.72804e-202	1.17218e-41	1.19893e-155	0.66421	0.731608	0.144418	1.25084e-09	3.69385e-11	1.26312e-06	5.85258e-18	4.49117e-44	1.56592e-26	1.66337e-42	2.603e-15	4.2463e-18	7.41158e-15	8.16408e-18	1.18826e-23	3.19261e-46	4.18166e-21	2.66897e-14	1.28109e-80	3.02873e-58	2.67699e-80	4.10807e-21	1.89144e-20	3.53088e-35	1.25284	0.0450892	1.07447	1.80701e-12	0.0138815	6.02003e-19	6.52143e-35	2.64233e-24	1.05633e-72
AC090587.2	0.0991906	0.089662	0.203519		0	0.041731	0.279741	0.0727502	0.0459262	0.0299181	0.0143161	0.100353	0.0453433	0.0300713	0.0514263	0.218661	0.173478	0.273122				0.0399104	0.0530472	0.0277287	0.14172	0.0616832		0.0134675	0.0673834	0.0616496	0.0868124		0.027399	0.143253	0.0287636		0.0133473	0.0263842		0.269378	0.0559278	0.257398	0.188548	0.220115	0.128664	0.0689528	0.131578	0.0172254
AC090945.1	0.204607	0.262668	0.211265	0.291234	0.36902	0.0848929	0.381814	0.237531	0.280082	0.336978	0.496727	0.153252	0.030811			0.173339		0.204448	0.247625	0.350442	0.575338	0.163179	0.108133	0.028393	0.10572	0.0252373	0.191975	0.21947	0.191872	0.219042	0.201414	0.252859	0.278115	0.451356	0.671598	0.122718	0.354175	0.271848		0.335694	0.171023	0.430862	0.236288	0.223693	0.290686	0.140334	0.209478	0.104839
AC091171.1	1.35306	3.90559	4.20681	1.04848	2.13814	2.4433	2.37462	3.63241	2.67096	1.58856	0.811918	0.861515	0.720137	1.07449	0.943346	3.67705	2.97886	2.80515	1.83296	2.05311	0.780851	1.0401	0.910431	0.74811	1.15628	0.565058	0.971431	0.688255	1.01129	1.97744	0.808705	1.02487	0.574689	1.40017	0.568665	1.14129	1.03927	0.88755	0.279148	1.75763	0.631551	0.483234	1.89893e-07	1.10354e-11	1.80236	0.706564	0.936781	1.06261
AC091729.9	1.94435	2.71085	2.13947	1.06897	1.87402	0.852787	1.3614	1.41383	0.448106	0.702202	1.39392	1.38363	2.03993	2.12095	2.56906	1.67162	1.87883	1.59033	2.31993	3.15969	1.87852	6.19392	6.2077	3.22424	1.15053	1.34019	1.18551	1.82399	1.3491	1.91947	2.75058	4.04647	3.61526	2.38111	2.17919	2.33944	1.85013	2.98083	2.5912	0.744143	0.971076	1.31697	1.19314	0.712312	1.92545	6.13424	5.12778	4.88959
AC092143.1	0.225258	0.202912	0.152374	0.323431	0.537753	0.545752	7.7358e-69	3.9634e-78	0.165628	1.05187	0.0156623	0.341618	0.373617	0.013208	0.018614	1.54997e-14	2.07415e-79	1.94074e-61	1.39195	0.415862	0.654982	3.01798e-10	1.01254e-90	0.0599264	6.24917e-13	0.0443814	0.085831	0.860616	0.984691	1.23606	0.151668	0.139011	0.238181	4.2808e-07	0.820079	0.923719	0.456217	0.457891	0.264906	0.181057	0.201063	1.61699e-48	0.0208473	0.0592743	1.45008e-23	0.403295	0.000889662	6.21074e-22
AC092155.1	1.78718	2.51752	1.66152	1.94933	1.48529	2.85073	1.19294	1.0515	1.0834	1.51345	1.08191	2.31638	2.27099	1.48263	1.99989	0.217603	0.410516	0.490684	0.664753	1.20813	0.460287	3.2838	0.926906	1.31312	0.913483	0.897472	1.72601	0.689986	0.742281	1.07762	0.374589	0.702404	0.608491	1.04918	1.9651	1.15099	0.507253	0.661821	1.27929	0.497515	2.53553	1.39449	0.610796	0.952708	0.292925	1.02909	1.57591	1.35876
AC092295.7	1.65515	0.404331	1.25191	2.68645	1.2616	2.05254	1.24786	1.87771	1.78493	1.03136	0.972555	0.555064	1.35785	2.12806	2.01428	1.42267	1.1782	0.883633	2.19558	2.99541	0.589593	3.83244	5.72093	1.61353	1.45866	1.15442	1.76369	0.641821	2.32948	1.63243	1.37015	1.11657	0.640793	0.514735	0.686418	0.155228	8.18584	9.14579	10.9071	0.697308	0.232764	0.104005	1.0952	0.953698	0.674006	2.81926	0.692291	2.00138
AC092620.2	0.242436	0.278392	0.411516	2.93596e-13	0.0802619	1.2356e-08	0.433485	0.232356	0.160424	0.242447	0.305052	1.35067e-05	0.0801158	5.50455e-08	0.270989	0.0750726	1.25953	0.375804	0.496236	4.86002e-06	6.38705e-21	2.74977e-36	1.07345e-32	0.149814	1.01275	4.23303e-08	1.45135e-17	0.142867	1.75843e-22	0.0803513	0.129244	0.0737206	0.145676	0.621487	0.299907	8.58817e-06	1.21943e-05	9.11044e-09	3.70268e-19	0.238294	0.0741267	1.73967e-05	0.382747	0.288137	0.149962	0.145209	0.0485947	0.287521
AC092835.2		0.159673	0.043164	2.70745	2.72228	2.83314	0.80016	0.0972299	0.398034	7.37522	8.43554	9.32788	0.387709	0.248788	0.390087	0.414284	0.885978	1.30667	7.12863	4.83577	7.22672	3.76969	4.13479	4.04894	0.127307			3.52007	3.48444	3.71881	2.21881	2.54326	2.94821	0.872137	0.923919	0.879457	4.98887	4.58385	5.73002	1.28279	3.79254	1.21194	5.03446	5.72054	5.61568	2.56449	2.31904	1.59192
AC093106.7	66.8652	54.2427	52.3004	34.0225	25.4804	27.9218	28.0346	31.2069	31.5101	56.5307	56.1346	68.0212	35.639	45.6541	33.679	7.68562	9.06928	11.1386	34.8381	24.846	23.3106	59.6794	65.6262	59.3943	33.4584	39.2692	38.5357	29.3381	25.9928	20.8467	23.2844	21.9043	18.7296	21.0524	31.2589	29.4129	58.8308	59.4351	93.8611	13.6214	20.905	17.448	26.6709	23.0806	30.585	55.6011	63.1953	47.6254
AC093323.3	9.12006	6.7372	9.2501	7.97422	6.43029	5.74787	4.88244	4.27395	3.89699	2.91537	2.53927	2.36574	1.49737	1.71649	2.0984	10.1243	10.4883	13.7675	3.80725	3.82976	3.25749	8.16006	8.05837	10.6014	6.94237	5.61764	6.2989	5.89402	5.40126	5.39448	3.34006	3.78416	3.71126	4.78037	4.95887	5.56818	4.90077	5.73159	5.98695	3.80634	4.20723	5.02497	5.6623	5.13865	5.2583	9.10062	7.94265	7.7884
AC093391.2	0.601475	0.575194	0.261458	0.0867778	0.245323	0.606742	0.262361	0.20367	0.281252	0.0896537	0.0325915	0.705227	0.291004	0.569348	0.172251	0.638962	0.620525	0.35453	0.231263	1.24001	1.41106	1.00364	1.14128	0.0911573	1.47209	0.18957	1.00128	1.63831	1.71539	1.68225		0.0886001	0.232582	1.07855	1.22033	1.37924	0.030389	0.357363			0.716367		0.456874	0.173466	0.858321	0.0691206	0.361121
AC093415.2	0.244738	0.263839	0.489818	1.64151	1.66647	0.697785	7.41605	7.08475	7.34378	4.36668	2.80091	1.8728	0.394835			2.64125	1.54741	2.49284	2.94374	2.52746	6.65272	2.8918	1.41732	2.79421	0.630363		0.586551	0.0544002	0.668693	0.183921	0.37196	1.1967	1.32551	0.332981			1.7337	4.12019	2.83083	2.49819	0.840655	0.905552	0.097583	0.483146		1.23564	1.42283	0.275034
AC093510.1	0.382414	0.502489	0.0820014	0.770864		0.174494	0.172707	0.463656	0.095671		0.639264		0.191626	0.0937514	0.21577	0.179541		0.0896016	0.338175		0.195171	0.51348	0.504309			0.238932	0.427198	0.935615	0.506674		0.769747	0.087512	0.340131	0.908584	0.982511	0.843692	0.0851821		0.810746		0.620594	0.0945676	1.09753	1.80398	0.805082	0.52018	0.780014	0.106561
AC093616.4	14.9284	12.948	10.4062	7.2037	5.62299	3.63058	8.70402	8.40381	9.62789	9.12061	6.8527	8.01845	3.93825	3.1328	3.42407	3.21442	2.48407	2.28441	7.32145	4.88968	6.98315	10.2503	9.76888	10.785	10.2479	8.27612	6.83069	5.51382	6.05079	5.02329	8.10694	4.92012	3.69594	5.76659	4.35432	5.73608	7.10736	9.59966	8.76648	2.67865	4.28473	2.99125	9.24507	9.12901	5.87506	4.57137	2.82983	4.57169
AC093627.10	0.0634741	0.0765112	0.228072	0.927981	0.663127	0.88956		0.00791762		1.08513	0.278714	0.43155	2.78165	3.15355	2.07364				5.92272	10.9401	7.34277	2.00158	1.47473	1.36337	3.67396	2.56696	3.74822	0.567406	1.11889	0.218547	3.30609	3.0122	3.66056	0.106275	0.117164	0.0494643	0.123522	0.141836	0.00771077	0.238618	0.169838	0.126762	1.87443	1.68083	1.38619	0.0375656	0.230553	0.00939754
AC093642.5	1.92848	1.66429	3.68726	0.96452	0.968007	0.115254	0.478805	1.48168	0.407484	2.16194	1.98948	4.67907	1.36426	1.02773	2.6779	3.76064	2.93995	2.11312	1.60892	1.63103	1.11811	0.341679	0.242768	2.68564	0.912889	1.06585	0.339544	0.217425	0.831315	0.326456	0.9383	3.1931	2.76135	2.3966	1.4452	3.18244	0.0779598	0.122894	0.733151	1.49594	3.6236	1.80547	1.70383	0.289452	1.92405	2.55441	7.0735	3.80999
AC093673.5	6.1885	7.76939	7.3392	5.62986	4.80307	8.07768	1.97947	2.22042	2.18914	3.1369	3.51788	4.77056	1.29639	0.682496	2.13271	1.49487	1.0343	1.5841	4.22068	4.22239	5.07281	7.75478	7.34833	6.00251	7.74309	8.54561	8.89347	3.09787	2.89877	3.085	12.0052	12.5706	13.0851	1.4615	0.742977	0.97466	14.8107	17.9246	16.41	0.593519	0.645925	1.27863	2.37922	0.71475	1.20958	2.43534	0.780632	0.221557
AC093724.2	1.56298	3.65901	3.73615	1.54341	3.04139	3.76249	3.97166	5.67602	3.21539	5.02066	4.88865	3.10622	2.78901	2.20339	2.86645	2.42435	2.07303	3.15936	2.16561	2.73383	1.93542	2.91995	2.44693	1.45713	2.85031	2.00269	6.45815	1.44351	1.79933	2.86936	2.10224	1.61921	1.36604	2.01032	1.43444	1.15507	1.16775	1.361	0.809121	5.42678	2.11118	4.1382	0.582575	0.916968	1.57371	0.737567	1.27529	0.514521
AC093734.1	7.61408e-10	2.19192e-12	0.000113429	3.08402e-07	3.43154e-05	0.374297	5.81804e-29	0.00854395	0.0100107	0.0811298	0.0189058	2.04656e-09	1.33099	1.03444e-06	0.000272096	0.124628	3.75805e-12	8.80272e-06	1.82635e-07	0.174091	8.12937e-05	0.0294636	7.04748e-09	2.77532e-43	7.48807e-19	5.92747e-18	7.43728e-06	5.79906e-09	2.01824e-25	3.15768e-06	3.24805e-05	2.5525e-22	1.06176e-05	7.39239e-06	0.233197	5.44209e-08	2.65615e-05	4.46361e-06	3.27881e-08	8.61789e-07	9.98443e-10	5.37894e-20	4.39045e-06	2.86385e-15	4.68179e-07	9.94567e-22	0.0941797	0.000203373
AC093838.4	3.45427	3.91477	3.9727	2.80455	2.14678	1.82098	3.86461	2.45634	2.08313	3.15165	3.86117	2.41159	2.93494	3.20439	2.50886	4.85088	5.31786	5.12016	5.46147	3.8915	5.95922	2.6829	2.6841	3.81368	4.07297	3.54667	4.51231	2.83201	4.02934	3.12285	4.80824	3.08552	3.28215	5.20009	3.91717	3.63688	3.45167	2.4724	3.09143	3.50197	2.8478	3.08746	3.31829	3.34696	2.80045	2.87388	2.70048	2.46757
AC096772.6	0.630643	0.166173	0.299747	0.436251	0.194072	0.356567	3.44779	3.29761	2.39114	0.426068	0.479444	0.804989	0.777302	0.192369	0.703764	0.109315		0.0367793	1.21291	1.39862	2.0113	0.377914	1.09117	0.538498	0.401369	0.478382	0.38062	0.415106	0.483493	0.512069	1.01411	1.77234	0.735155	0.200954	0.294058	0.386143	0.825334	1.34485	1.0574			0.038763	0.558558	0.0352176	0.549291	0.247618	0.38316
AC097359.1	1.15699	0.255451	0.3965	0.000133312	0.479935	0.508498	0.192189	0.0930679	0.238832	0.637096	0.506652	0.443441	0.404236	0.438356	0.439895	0.708513	1.10607	0.681021	0.545214	0.488286	0.384067	0.813645	1.35423	0.69164	0.627115	0.392889	0.442203	0.443611	0.870676	0.804925	0.301843	0.302897	0.36604	0.474965	0.630411	0.404962	0.385236	0.292183	0.345576	0.43554	0.167878	0.369155	0.443254	0.536114	0.607957	2.84667	3.69142	2.74049
AC097500.2	0.519822	0.0815156	0.101008	0.442857	0.0950206	0.162321	1.50119	1.39373	0.165299	0.928575	1.30592	1.992	0.852394	0.425344	1.37883	0.945986	0.449331	0.444226	0.899941	0.110897	0.44508	0.105901	0.103583	0.223303	0.187047		0.16922	1.2254	1.51478	0.0960819	0.0943274	0.358423	0.729399	1.126	1.03261	1.70323	0.946662	0.0818715	0.133749	0.141216	0.516398	0.0946112	1.27287	2.14166	0.528818	0.319818	0.158151
AC097523.1	0.686207	0.959095	1.63887	0.42983	0.755146	0.964559	0.463237	0.298036	0.545744	0.277867	0.684901	0.36663	1.197	0.334183	0.731234	0.35245	0.386779	0.70264	0.331544	0.257359	0.695335	0.305853		0.225347	0.513612	0.512502	1.1896	0.0910528	0.030113	0.306941	0.9874	0.0624846	0.424186	1.06144	1.54364	0.968612	0.790995	1.17487	3.15193	1.69635	1.42409	3.43882	0.750545	0.428741	0.287058	2.7832	0.329149	2.04977
AC097533.1	2.41448	2.28023	0.597451	2.62383	1.76391	1.57589	2.7407	1.53154	2.24034	2.54074	2.84717	0.286871	1.04926	0.337173	0.195591	1.63805	0.978573	2.41335	1.97927	1.63312	1.56839	2.21804	2.60718	1.00635	0.795722	0.887162	0.936197	0.619058	1.06679	0.685636	1.51518	1.7595	1.67314	0.603056	1.43798	1.84295	0.626494	1.36592	1.64674	1.21815	1.78203	0.170324	0.332393	0.463795	0.32266	1.72583	1.12812	0.379672
AC097662.2	0.379824	0.617434	0.9466	0.245328	0.1871	0.099207	0.415602	0.487227	0.0990618	2.55685	0.896373	0.233359	1.03528	0.1005	0.293106	0.187267	0.436394	0.869993	0.776205	1.46842	0.519516	0.416526		0.0550319		0.0138095	0.165198	1.03853	2.59676	0.20745	0.0754477	0.036409	0.331099	2.87446	0.176046	1.02657	0.0956836	0.195292	0.820558	0.718811	0.164862	0.964064	0.636945	0.0923294	0.257401	0.0364226	0.0631873	0.0681747
AC097721.2	0.249062	0.386711	0.986421		0.128047		1.31465	0.0617912	0.578242	0.128478	0.48669			0.126026	0.289005	1.08119	0.910436	0.963756	0.271188	0.24173	0.591795	0.454561	0.168402	0.297722	0.278156		0.0570023	0.455082	0.453214	0.257734	0.424798	0.17518	0.573542	2.86688	2.0459	1.19969	0.515613	0.173344		0.380526	0.177595	0.444658			0.0600393	0.52895	0.390507	0.523579
AC097724.3				0.445156	0.0838937	0.152697	0.456908		0.0837649	0.0845394	0.079714	0.276505	0.166888	0.410559	0.377441	0.156886	0.554003	0.078481	1.0688	1.02674	1.45115	0.522238	1.17406	0.783587	0.0728902			0.148708	0.221723	0.167754	2.0859	1.44836	2.21522	0.65136	1.09342	0.981199	0.497804	0.306674	0.078669		0.862502		0.159436		0.23492	0.681125	0.876477	1.98942
AC098614.2	2.77593	3.15478	3.92117	10.2939	9.04669	10.6523	5.23015	6.36929	4.02973	7.06806	7.89896	8.8066	7.55509	7.58072	5.76195	12.5129	10.3446	10.3437	3.95525	5.46133	4.56513	5.79392	5.60141	8.24623	2.74994	3.48578	6.69395	11.9416	12.8418	10.5914	3.64021	3.29458	3.37269	2.39516	2.69065	2.76476	11.2599	14.4281	20.5778	1.88556	3.74346	5.0499	9.35124	7.47061	8.05262	0.0881909	0.411251
AC098820.3				0.0700198	0.237844		0.141984	0.0765064	0.0792514	1.52313	0.150663	2.42091	0.238331	0.580278	0.446203	0.185786	0.336007	0.332714	1.32465			0.247832	0.679095	0.225411	0.705234	0.79662	1.80639	1.4432	0.279258	0.633606	0.285489	0.653409	0.280782	0.204645	0.870263	0.804088	0.212311	2.33854		0.471922	0.935285	0.977347	0.680909	0.319137	0.443927	0.717139	0.54672	0.394787
AC099522.2	21.8571	19.6328	12.5084	33.9808	28.2793	31.221	14.5327	12.6133	10.4504	14.8871	7.72749	12.6046	14.1274	10.2931	8.5279	4.66361	5.02627	4.7443	9.06914	4.90622	7.79737	6.14669	6.98772	5.06959	12.8717	18.1713	10.6618	9.37988	12.4541	11.2333	12.5074	16.723	11.5135	11.2146	17.5676	9.06357	26.4021	34.0478	27.5854	3.95352	4.14688	3.72776	16.8411	11.6557	11.5677	12.0717	12.7745	11.6646
AC099850.1	0.447455	0.0617368	0.061936	0.3738	0.396888	0.265315	0.128129	0.174173	0.474027	2.12307	1.67986	1.13788	0.216813	0.214751	0.20453	0.0338801	0.0688787		0.0644737	0.0342307	0.0374299	0.255417	0.221932	0.633683	0.652343	0.237072	0.0321691	0.411734	0.578203	0.513088	0.589724		0.618868	21.8755	23.1701	20.731	0.831127	0.640012	0.44067		0.0334301		1.17735	0.819023	1.32844	0.657976	1.003	0.818383
AC100791.1	0.364909	1.90375	9.2722e-22	0.685273	9.84041e-49	9.80778e-30	1.57387	8.37461e-41	0.238306	6.87752e-39	1.18509	1.33698	1.35511e-13	2.61818	1.06823e-32	1.1059e-12	8.17026e-08	3.65868	2.24108e-32	1.39963e-26	3.33343e-33	1.75186e-36	2.86352e-13	0.00013635	7.35715e-10	2.99244e-32	2.27903e-05	4.48185e-09	0.417241	8.69603e-22	2.20174e-77	1.66661e-11	2.8081e-09	1.08892e-75	4.01563e-114	2.24081e-24	1.60125e-31	1.69055e-12	2.13409e-30	7.66358e-08	2.08395	0.112581	0.277898	0.577655	0.00115055	3.66699e-93	2.59471e-17	2.52401e-12
AC104534.3	2.27044e-111	1.61084e-36	3.88823e-18	7.1191e-111	2.03567e-33	1.85388e-97	6.69663e-31	1.0723e-108	2.12093e-75	1.8484e-19	1.55974e-23	1.59692e-20	4.47514e-10	2.04686e-07	5.40818e-24	0.44575	1.60873e-10	2.23984e-31	7.57982e-36	0.229968	3.31096e-22	3.9987e-58	2.00439e-64	3.27798e-95	1.34838e-31	3.03449e-104	9.90531e-18	4.86705e-87	1.15925e-42	1.29977e-11	7.8678e-16	2.94865e-15	8.44062e-10	0.000254532	0.774598	1.30796e-11	4.25699e-67	0.247235	1.26349e-38	2.23621e-13	3.14337e-25	2.07173e-19	1.29041e-148	0.636509	4.90596e-23	2.07328e-47	2.15397e-45	1.0574e-19
AC104667.3	1.39199	3.33838	1.55038					0.036071	0.0754942	0.52973	0.710001	0.682028	0.112244	0.111147	0.0423494	1.56706	1.00163	1.39037	0.406562	0.0354377		0.574225	0.229788	0.145505	0.587038	0.435657	0.199855	1.25735	0.665069	1.59324	2.25458	1.30646	0.712895	1.02188	1.48694	0.409068		0.033163	0.0350995	0.561249	0.208539	0.868779	0.071702		0.387873	2.51301	1.30193	3.15745
AC105760.2	0.123407	0.031829	0.0643112	0.0639983	0.0560991	0.120757	0.132357	0.0541721	0.0949103	0.297283	0.284285	0.1556	0.0562598	0.0372831	0.0212622	0.263795	0.322666	0.196042	0.167839	0.177977	0.195217	0.214724	0.0822724	0.103323	0.0960526	0.107235	0.166866	0.618159	0.367674	0.420312	0.230592	0.324808	0.339628	0.274698	0.231759	0.131143	0.61293	0.459454	0.421928		0.052045	0.0375474	0.341835	0.136461	0.230455	0.530232	0.291119	0.213487
AC107982.4	2.16118	1.97542	2.07687	2.22609	2.18403	1.57737	0.01107	0.0283863	0.0377819	1.81194	1.73857	1.91823	0.414453	0.500639	0.29857	0.923871	0.195486	0.95423	0.011134	0.177358		1.89701	1.63251	2.36001	0.10093	0.106502	0.0333411	5.2985	3.88398	4.18015	0.281846	0.598857	0.36558	1.08007	0.661401	0.967917	0.283728	0.216878	0.200259	0.115008	0.1248	0.154832	0.149074	0.26081	0.183533	1.10059	0.654942	1.05272
AC107983.4	0.956815	3.4586	4.5844		1.71257	4.31147	8.9001	21.3077	14.9229	7.426	9.6309	10.9567	1.78431	2.26124	4.4758	3.83684	0.753428	1.60841	0.653622	2.02888		9.21031	4.24203	7.24641	2.3498	3.61844	8.5965	4.5247	5.81232	12.5842	2.12347	1.99339	1.60431	2.20351	3.89167	8.72672	11.2773	4.94654	2.75472	0.330885	0.665275		0.934374	0.99381	2.88592	6.4287	4.75414	14.3662
AC108479.2	9.69429	18.1251	13.6967	5.42006	7.36728	8.66762	17.2851	25.4107	18.1998	30.9553	33.5843	21.0655	13.5929	11.5845	8.66156	30.9201	27.7523	35.8328	33.4859	23.0734	16.2702	26.5505	20.9779	11.1826	7.56609	2.51069	11.4847	20.9555	20.2582	18.2861	31.0222	24.7227	24.4852	47.4741	51.2057	27.4581	23.9889	24.2805	11.7717	16.0454	10.7655	8.02077	6.16483	5.69718	8.29456	29.2453	35.8179	27.2218
AC108488.4	0.890565	0.298537	0.590551	0.298602	0.349793	0.397764	2.34258	3.8082	3.66686	0.90172	0.789313	2.03246	0.000528214	0.287332		0.111856	0.000326964		1.08673	1.22453	0.305695	1.30842	0.745326	2.74658	0.000741169	0.269407	0.0917204	1.8529	0.949471	0.146833	0.0963763			0.114196	0.0559008	0.23482	2.48374	2.06148	2.46084	0.117774	0.826246	0.118623	0.537779	0.000235964	0.715175	0.0539646	0.22607
AC108868.3	0.812254	0.348765	0.85321	0.21866	0.621928	0.215058	1.04188	0.461459	0.376638	0.781594	0.533985	0.703377	0.142581	0.414714	0.266499	0.489663	0.186949	0.0440187	0.457514	0.0534269	0.12423	0.727819	0.667001	1.99038	1.58378	0.479062	0.636203	0.547359	0.9569	0.187711	0.254681	0.477986	0.333404	0.122935	0.788115	0.183683	0.848586	0.590309	2.62871	0.188825	0.13198	0.744372	0.316659	0.549221	0.352367	0.684733	0.366302	0.208431
AC111200.7	2.60041	3.17707	3.33867	1.43086	0.974254	0.672783	1.2464	4.86397	2.66026	5.46259	6.08949	2.9406	2.19522	4.17002	2.69313	8.90979	5.72844	7.05902	6.02366	9.91349	2.99657	5.34568	5.86788	2.5461	1.41665	0.792634	2.36715	3.22807	5.65065	3.88349	6.19196	4.9208	4.90922	7.40189	8.94758	3.04383	4.00676	4.91666	4.02339	4.26001	2.34714	1.46756	1.29252	0.509811	2.74317	6.88405	8.13316	8.80061
AC113189.5	6.95411	3.92424	3.43456	6.47629	5.94801	5.40159	0.740195	8.48918	0.991778	4.22664	5.4725	8.88907	0.958128	0.0904902	0.833444	5.32323	10.011	3.31506	2.16229	2.46328		8.56221	8.30957	10.0283		4.10332		2.41083	1.13284	0.622781	2.07274	3.02314	1.26092	0.876356	7.62044	4.14638	7.04716	7.43465	8.63304	2.55397		2.62039	1.31434	1.72828	3.70957	0.81635	4.26264	3.16136
AC114755.7	1.31636	1.46984	0.815172	0.358495	0.170141	0.124279	1.54038	1.14944	0.443452	0.808745	0.193996	0.786938	0.61192	0.903234	0.370949	0.318619	0.644515	0.255808	0.422106	0.706085	0.767724	1.14801	0.805263	0.715819	0.888176	1.31979	0.696702	0.966959	0.691887	0.102598	0.550193	0.837768	0.243113	0.468827	0.287233	0.279258	0.582966	0.759425	0.83015	0.842471	0.629071	0.618292	0.715222	0.878282	0.25505	0.497699	0.269312	0.45752
AC115617.2	0.86288	0.675365	0.394297	1.41563	1.19117	0.66933	3.66631	4.05042	4.0034	0.5421	0.128615	0.201658	2.35554	2.75202	2.11141			0.0510805	1.87776	1.53593	1.702	0.69601	0.783885	0.854165	0.351691	0.066883	0.0241155	1.20408	0.88822	0.492006	0.7916	0.66699	0.63155	0.303351	0.28058	0.66973	0.83956	0.752715	0.60998	0.59028	0.701385	0.511635	0.958865	1.00303	1.04337	0.0738125	0.364891	0.121969
AC117395.1	0.0611721		0.165622	0.886343	0.257186	0.502759	0.342226	0.403511	0.520351	0.480527	0.152731	0.320355	0.483102	0.638525	0.510602	0.241584	0.706457	0.366251	0.460046	0.427306	0.500968	0.0284357	0.197805		0.0829282			1.31904	1.74742	1.3079	0.736613	0.381799	0.552154	0.24978	0.488189	0.544969	1.0823	1.02398	1.69164				0.370454		0.273407	0.0880018	0.119373	0.109542
AC118138.2	3.48787	6.91072	6.70535	6.36574	8.0195	7.7187	7.22026	8.23921	8.02293	4.37342	2.94177	2.14273	7.70727	5.94957	5.2414	2.71075	2.21725	5.07001	9.50088	9.30555	5.41576	5.63612	4.45489	1.86991	4.78507	3.62	7.34756	4.43408	5.67138	4.34865	5.37281	5.36222	5.63934	3.95097	3.23661	3.24325	5.24085	5.6911	2.51214	12.9342	17.1215	10.5598	2.24263	1.37158	3.101	10.5013	10.6632	9.85483
AC123768.4	0.558779	0.236902		0.240059	0.165188	0.176441	0.834167	0.1063	0.276898	0.110282	0.235436	0.15189	0.220261	0.16299	0.124459	0.154851			0.0979064	0.286318	0.0567318	0.512609	0.555575	0.59782	0.0477023	0.181406	0.122619	0.579535	0.0732252	0.222313	0.424748	0.3517	0.0740847	0.474582	0.355272	0.236038	0.601734	0.271781	0.301539			0.054757	1.48448	0.954853	0.827971	0.300212	0.134883
AC125232.1	12.1791	10.0036	8.73287	6.57699	5.3511	3.38978	6.46801	5.48998	5.78122	7.66746	6.97032	8.8164	3.50324	3.43459	3.1707	2.72852	1.98834	1.79854	5.11108	5.88488	5.07524	6.49004	7.01773	6.91203	5.84529	5.01932	4.06171	4.00396	4.46087	4.18711	3.27317	4.13888	3.97764	3.50686	4.19169	4.21024	2.32016	3.68031	3.08105	3.47269	2.6405	2.84011	5.01547	3.00459	3.57939	2.95455	2.63909	2.33912
AC127496.1	0.143736	0.323581	0.217358		0.025297		0.224108	0.488526	0.179451	0.226539	0.192291	0.0420574	0.329635	0.352396	0.344782	0.0475539			0.045332		0.0526916	0.0894392	0.177984	0.116646	0.0651097	0.248929	0.157965	0.406492	0.270907	0.361037		0.138711	0.160446	0.0873974	0.0721927	0.0252858	0.089644			0.150673	0.0469148	0.0253532	0.194527	0.0691055	0.167606	0.161778	0.0942305	0.316885
AC127904.2		0.117898	0.274905	0.278195			0.366656	0.530565	0.0923442		0.174072		0.595858	0.317163	0.0518413	1.71878	1.0903	1.51593	0.0816339	0.346995	0.142039	0.365117	0.0804278	0.678804	0.316461	0.226025	0.653046	0.326264	0.488256	0.185486	0.298448	0.209057	0.0412104	0.592512	0.346179	0.27272	0.202899	0.245197	0.215063	0.590375	0.76329	1.00444	1.14128	1.45178	1.55298	0.20844	0.450676	0.258752
AC131180.1	0.065465	0.0155414	0.0262525				5.32506e-09	1.5599e-09	0.0790067	0.077797	1.79776e-22	0.0837344	3.74334e-06	4.14044e-13	3.06379e-06	2.36421e-12	6.57199e-10	0.0888979	0.0131864					0.0135037	6.83084e-09	2.32937e-11	3.77409e-07	6.72782e-07	4.52237e-13	0.21562	1.2132e-06	2.53528e-16	3.27839e-07	1.1033e-33	1.76821e-08	6.90892e-08	0.0563507		0.0483095	1.32566e-05	1.79392e-06	0.244948	1.97808e-05	1.45238e-05	0.000356368		7.43951e-42	4.97469e-05
AC131571.2	0.302435	0.209547	0.253438	0.0632801	0.0491568	0.0905853	0.348336	0.284791	0.249121	0.0244522	0.186829	0.28607	0.394202	0.269072	0.167514	0.508265	0.682285	0.608014	0.264315	0.233675	0.256041		0.0216172	0.045326	0.0843271	0.181374	0.219262	0.109717	0.19744	0.0751854	0.100825	0.0224626	0.200477	0.212297	0.0935449	0.294884	0.239517	0.367971	0.207916	0.414796	0.227923	0.443477	1.03961	1.43265	1.53566	0.247033	0.244224	0.391959
AC133528.2	0.270534			0.235824	0.245676		0.911251	2.60994	1.89536			0.594394	0.728681	0.463133	0.270117	1.13801	0.449874	1.76308	0.419059	0.225416		0.445057	0.851072	0.23558	0.453205	1.45254	1.08078	1.07413	1.46994	0.705301	1.13038	1.99899	2.49373	0.418323	1.09058	2.05901	0.219118			0.486596			0.461067	0.63779	1.11227	1.0801	0.279075	0.775178
AC135048.13	0.318744	1.79067e-71	3.94233e-86	5.21892	3.84188	4.5765	0.122686	1.14419	0.599759	0.127212	0.897811	0.783913	0.705172	1.04253e-23	1.68382	0.771747	1.10471	1.66592	0.651397	0.133353	3.23006e-196	1.73196	0.748478	0.245472	1.58863	1.11578	1.54151	2.08978	3.43048	0.694011	0.446114	0.937311	1.01335	2.67941	4.40117	1.9328	0.895095	0.405381	0.099365	3.07734e-06	9.06417e-113	0.610313	1.95913e-103	0.147361	0.0686387	2.66576	1.28659	1.60695
AC135178.1		0.0642954	0.0215958	0.0431523	0.226204	0.162087	0.0222654	0.0242687	0.0254714	0.0500152	0.0477625	0.167148	0.0755796	0.0250098	0.0856415	0.165366	0.240553	0.239097	0.0900825	0.262823		0.444302	0.243151	0.695334	0.258744	0.288535	0.0672629	0.538501	0.358891	0.358726	0.0412335	0.0689084	0.113871	0.130251	0.191281	0.226116	0.445326	0.531407	0.377972	0.374254	0.139838	0.151144	0.362391	0.3662	0.523382	0.482215	0.218468	0.372106
AC137934.1	0.513132	0.60662	0.427123	0.0804497	0.43057		0.0095898	0.0052301	0.253433	0.0861637	0.336232	0.214734	0.144171	0.0323695	0.00820731	0.796208	1.25459	0.865021	0.269578			0.30634	0.322277	0.0199643	0.00464137			0.154796	0.0870756	0.0810807		0.159855	0.163601	0.334406	0.166795	0.113837	0.0383863	0.0380917	0.020366	0.469832	1.03197	0.191404	0.606395	0.230712	0.383713	0.938757	0.330287	0.0741189
AC138031.1	0.476417	0.42404	0.536232	0.577413	0.333879	0.314337	0.0339731	0.143171	0.474675	1.5969	0.916022	0.469318	0.0367612	0.0884626	0.071899	0.218091	0.166572	0.773644	0.165139	0.0686031		0.0485168	0.0967085	0.017662	0.234997	0.0141514	0.0491916	0.295451	0.282654	0.408596	0.0481571	0.321997	0.216556	0.116196	0.0418872		0.568466	0.709851	1.2288	0.137274	0.41731	0.363554	0.526792	0.121695	0.62104	0.312983	0.369027	0.106126
AC138035.2	0.692834	1.14528	0.89944	0.285024	0.257686	0.258439	1.02231	1.06976	0.820156	1.44429	0.958687	1.43419	0.800712	0.50328	0.512681	1.78994	1.95957	1.83584	0.217679	0.487403	0.268629	0.698831	0.974085	0.584492	1.04853	0.879978	0.388608	0.591016	0.891811	0.617231	0.751615	0.942732	1.03741	1.35444	1.00451	1.00604	0.752591	0.941705	0.64456	3.45889	2.31272	1.33859	0.658333	0.691362	1.13794	0.353428	0.777574	0.700559
AC138623.1	40.5634	16.0997	11.1019	16.268		2.32266	13.9444		15.2344	11.3043	18.928	12.5871	12.3205	31.964	9.05618	8.39579		18.2747	4.98472	10.0295				2.38518	12.1751	8.96908	6.70883	13.3173	9.45974	5.17402	13.8713		2.06639	10.4035	16.1404	38.0279	36.1716	28.7004	9.03675	12.2333	13.1114	7.53846	5.73015		40.3751	8.93945	4.51531
AC138783.12	2.58153	2.78692	0.792495	1.4413	0.798602	0.643548	1.23652	1.56573	0.932727	2.52402	1.08769	1.78804	2.42018	2.85884	2.972	1.91709	1.60156	1.59595	1.8629	1.15593	1.76024	1.76133	1.07383	2.41043	0.888751	1.17379	1.62395	2.39738	1.36508	1.38424	1.78055	1.90331	1.36728	1.69412	1.90223	1.89772	0.725531	0.871145	1.24919	1.36622	2.12394	1.7064	2.88008	2.62043	2.57536	5.8209	4.58398	3.79552
AC139099.3	0.460938	0.553195	0.356166	1.10834	1.87838	0.507652	0.970251	0.277155	0.383928	1.95228	1.03025	0.74335	0.824245	0.74333	0.174947	0.42103	0.168167	0.564537	0.654486	0.706349	0.181426	0.451028	0.311004	1.11585	0.839041	1.24931	0.346474	0.860669	1.13734	0.586324	0.127884	0.368344	0.548688	0.395406	0.906492	0.366124	0.0575694		0.109951	0.493096	0.401285	0.272331	0.0562647	0.160007	0.0739135	0.0133723	0.366053	0.402844
AC139100.2	0.246316	0.167379		0.533679	1.60158	0.503154	0.530825	0.932772	1.57747	0.798218	0.648138	0.32471	0.527435	0.131427	0.45398	2.49897	2.75636	1.79574	0.935776	1.29427	0.847483	0.262051	0.128311	0.35394		0.120277		3.55471	3.68389	3.83082	0.320565	0.088946	0.665745	0.44203	0.505886	0.64722	0.259023	0.0871066	0.0457525	0.327569	0.990507	0.209277	0.0487843	0.0810021	0.26849	0.0559227	0.0897747
AC141586.5	0.73583	0.744802	0.591931	0.554538	0.500547	0.729196	0.656972	0.620668	0.502665	0.419361	0.208075	0.520903	0.541325	0.257515	0.453764	1.77068	1.64319	1.7383	0.69607	1.07995	0.425045	0.64917	0.447438	0.590206	0.36789	0.40347	0.973191	1.35611	1.20308	1.73307	0.270324	0.665051	0.526124	0.926789	1.04089	0.517709	0.921472	0.732972	0.676545	1.60281	1.51681	1.35163	0.632354	0.635463	0.927472	0.62272	0.653555	0.721683
AC144652.1	0.433099	1.53376	1.20042	0.760347	0.998252	1.1816	0.278117	0.247849	0.375436	0.59638	1.32791	0.924205	0.171489	0.226829	0.129507	0.241199	0.327298	0.325272	1.45541	1.51741	1.21644	2.77401	2.23188	2.26362	0.930822	0.795576	1.19563	0.509025	0.432395	0.464705	2.61729	2.05881	3.12351	1.9703	1.84296	1.79403	0.78331	0.755362	0.402057	0.113232	0.423057	0.199924	0.931689	1.03796	0.971094	1.40625	1.16692	1.16783
AC159540.1	2.42284	1.468	1.64878	0.672773	0.0707023	0.33937	1.40518	1.27837	0.176426	0.72476	0.240507	1.18263	0.645244	0.716868	1.4961	7.12359	7.4847	6.4316	1.60269	2.8892	0.305771			0.0651526	0.741339	2.0813	0.57266	3.38071	2.85921	5.20921	0.214106	0.167353	1.29044	2.30197	0.943253	1.14297	0.344418	0.438558	2.1725	2.60574	3.06943	6.72882	1.75097	1.55204	1.26187	0.321971	0.320718	0.198119
AC174470.1	3.9355e-39	1.56004e-63	2.58063e-92	3.84974e-05	1.32105e-05	0.137032	4.61095e-07	0.111546	0.0740677	5.48201e-07	0.0274429	2.07378e-47	0.0917657	1.97824e-06	0.0330484	0.0839102	0.00978422	1.36013e-06	6.19372e-71	1.59978e-63	1.23046e-42	5.90119e-46	1.83315e-19	1.54859e-61	8.44286e-40	8.69313e-84	1.80181e-53	0.0606311	0.0545	0.0642881	0.0085313	0.0412026	0.018348	0.143126	0.0363342	4.51838e-15	0.0461535	0.0350154	0.00941572	5.76275e-10	0.0313698	1.86892e-42	0.0798976	0.121186	0.0495253	0.0174127	0.0594392	6.57381e-34
ACAA1	6.89044	9.90226	7.96582	6.78726	9.84708	10.2874	12.8869	13.7427	10.7145	16.7304	17.3333	14.5416	8.79233	7.38389	9.62553	21.4366	18.0761	21.6612	23.1288	25.161	17.5345	17.8229	11.4214	10.2828	16.6286	14.254	18.9452	19.1165	19.2269	17.3226	18.1554	19.3939	15.0714	18.2941	17.8449	12.4172	11.3229	12.7072	7.63856	153.243	126.352	109.105	7.11236	4.84356	7.59588	9.06083	12.9968	9.70049
ACAA2	23.7527	17.2749	17.7022	40.8326	32.5277	30.2923	104.883	108.862	102.342	12.187	9.85826	12.568	54.2551	61.307	51.1195	0.743869	0.635205	1.2227	38.799	39.8095	37.2818	19.4175	23.0873	22.6126	2.8837	3.71252	3.78363	21.9592	22.6129	18.2712	20.3236		16.9281	8.56479	10.7817	11.0666	18.91	20.028	20.5638	8.09259	11.6629	11.8478	25.9973	16.5239	21.2825	16.0103	12.7627	9.80677
ACACA	15.5367	9.68385	11.3172	37.6814	25.5552	25.6018	42.2206	38.5403	32.4125	14.093	10.4202	16.2355	39.4878	40.6816	36.4584	12.4486	15.0517	15.7489	31.8148	33.0646	29.1618	54.5181	46.4324	46.8952	37.5982	33.4955	29.7154	48.9995	42.4623	35.5035	32.2242	30.6292	29.5101	13.7079	11.1942	11.3318	13.592	14.2281	21.1735	15.2959	23.2076	15.0745	19.0561	18.5203	14.7526	49.1137	48.9965	37.0094
ACACB	1.22391	1.64302	3.7959	3.35834	0.797228	0.149585	3.92429	0.745826	1.25933	0.0391133	0.114443		0.936545	0.295199	0.622974	6.2526	6.66032	4.98437	1.29973	2.27011	1.31358	0.752576	0.713702	0.264682	0.840514	0.293486	0.207651	1.40594	1.64124	3.39896	0.0109911		0.106291	2.52984	1.6425	2.5383	1.25162	1.01196	2.40503	2.79416	2.61476	0.573406	1.65329	1.21413	1.17691	1.16183	0.561956	0.617599
ACAD10	2.37942	4.55079	1.92252	5.92222	4.81148	4.44031	6.1577	7.58145	6.12363	6.34786	4.54674	5.50268	4.36088	4.36405	4.32823	3.97952	3.69852	5.07239	5.65896	5.61271	5.08077	6.25396	4.77134	3.82357	1.99468	1.96314	1.71928	6.18634	6.22846	5.21176	7.58678	7.8607	8.49042	13.497	11.7942	9.98865	3.43731	5.91591	6.78501	7.82579	7.23557	5.43026	8.57949	6.38072	4.62714	17.2375	21.6921	13.8894
ACAD11	4.83625	4.55761	3.39178	11.6666	11.1846	6.83618	8.02969	8.71465	9.033	2.58549	3.98873	2.77961	1.299	2.21602	0.820944	3.49002	6.70266	3.74017	8.31896	8.15198	11.9347	6.03657	6.16672	6.74896	1.87231	1.82395	1.10097	11.1969	7.8261	9.38575	5.64698	6.23315	5.71382	6.76057	5.14738	6.8111	4.90744	4.9878	5.02702	2.64038	2.89805	1.57867	3.6286	4.22258	1.7542	8.11618	9.94195	10.8165
ACAD8	11.3462	12.3358	11.0165	5.29887	5.36558	4.60396	9.04755	8.33203	7.81221	1.58371	2.08073	1.20179	16.75	14.2773	11.0178	2.41108	2.0932	3.29521	9.4959	12.3051	11.9735	11.2184	7.84916	8.82252	4.21148	3.87435	3.28172	2.0496	2.43332	2.56347	7.10497	6.96148	5.48816	5.17082	6.81325	5.5978	6.23484	5.50224	4.97332	6.22448	6.96687	8.19063	4.9632	6.02673	5.14431	22.8314	22.434	19.4461
ACAD9	20.9372	23.8231	22.5186	16.1083	21.8141	21.1309	14.8609	17.6183	17.1911	22.3061	19.1241	18.8773	9.05953	7.37613	7.85198	16.9503	14.7671	13.9332	25.8175	26.2899	17.2044	30.2365	26.7625	21.3997	9.08006	8.42983	12.1182	14.165	15.3136	18.8743	26.4444	25.8296	26.5582	15.1677	14.4269	10.813	12.6443	10.6062	8.3498	13.214	11.757	8.43939	6.44899	5.29711	7.47592	15.861	20.7433	16.4969
ACADM	35.4314	27.7531	28.816	51.9871	40.3187	35.8314	72.3664	62.7872	65.0704	23.3614	22.2523	25.0801	47.0413	50.8103	47.3334	12.247	16.5962	14.2684	21.8019	22.6615	27.0763	54.4852	54.61	61.7593	32.3761	35.6576	28.5878	57.3401	58.1603	47.9725	114.764	116.358	102.822	10.0477	7.81668	8.10944	27.5875	29.6436	33.652	39.7179	49.8743	45.7895	23.6784	17.5565	20.4849	15.9324	16.548	12.793
ACADS		0.058859	0.0197866	0.0987211	0.782791	0.997357	2.92055	5.01496	5.11259	5.70468	3.11891	1.81879	0.370957	0.3897	0.282959	0.0432893	0.0326399	0.0438316	1.03458	0.788229	0.119988	1.44451	0.830329	0.361401				0.287824	0.493372	1.50325	1.58753	1.26258	3.40833	2.4289	2.29593	0.99035	1.98251	0.790004	0.324623				0.0221374		0.0872141	0.315637	1.80765	1.62696
ACADSB	4.59458	3.26642	3.42956	2.21935	2.3191	0.907224	13.3834	10.8129	13.5786	4.07537	2.76899	4.54932	1.22354	1.52716	1.14056	25.5812	27.2082	31.5792	8.21488	10.1864	9.36403	11.7348	11.7105	16.4625	3.80233	4.59934	2.47114	6.51627	8.93127	6.91693	2.89434	3.44416	2.32256	6.96523	7.12933	8.93476	3.99096	3.77793	4.86781	0.391207	1.67928	1.43342	2.71047	2.61236	1.45379	14.96	9.41392	7.57361
ACADVL	79.5085	108.626	97.9675	56.2337	76.6864	77.2587	47.4202	46.9515	41.8542	80.4851	70.264	66.8176	26.9726	17.8291	14.5693	71.4036	64.9832	66.4207	38.5546	51.6999	31.9675	100.827	78.2489	58.7101	49.2434	44.4295	55.0341	73.9191	77.339	87.7436	57.1888	60.1956	57.5719	71.9155	61.9879	53.1672	64.4169	56.5587	46.1825	118.949	85.8536	85.2659	48.6991	44.0686	49.3314	58.608	49.7536	46.9993
ACAP2	39.3693	32.7696	28.988	16.8593	13.8306	12.731	24.3581	20.5759	24.1444	25.8875	26.5523	32.6842	12.0683	13.5028	12.2893	21.1499	26.1578	21.4088	14.8344	14.5232	15.961	55.9207	59.2153	64.9412	28.2464	28.3922	24.0777	21.4378	18.2192	16.9622	27.7369	30.4178	26.6341	22.0654	19.718	22.7426	15.9059	14.5936	17.6385	18.8064	22.4929	22.2633	10.5334	10.9295	10.442	63.1409	64.2274	54.8729
ACAP2-IT1	0.357877	0.628464	1.2336	0.160472	0.180632	0.164167		0.43572	0.54019	0.364553	0.514897	0.297385	0.720596	0.0882393	0.304427	1.60359	2.80726	1.1807	0.477383	0.169679	0.0918887	0.401851	0.237056	1.0137	1.1874	0.373884	0.722791	0.479897		0.991186	0.144944	0.164518	0.0800588	0.931786	0.840912	0.70612	0.240126	0.414379	0.592687	2.50126	2.08363	2.84791	0.860154	0.0808448	1.17843	0.570866	0.816529	0.602115
ACAP3	0.205093	0.493525	0.53296	0.76479	3.9494	2.14763	1.21148	2.05176	1.74748	3.27851	1.20828	1.05831	6.26696	5.62434	3.62773	10.9335	5.94732	4.46912	0.845017	0.44251	0.481741	0.756626	0.221738	0.336876	0.337554	0.301034	1.92	0.935981	1.65009	3.59355	4.2613	3.43017	6.38129	4.58058	4.44999	3.22095	5.00569	1.84931	0.308651	7.8549	2.92875	2.28013	0.408115	0.763686	0.583646	0.718125	2.10589	1.2536
ACAT1	38.6435	31.4296	29.8465	87.5698	74.4953	67.6756	43.2442	42.8225	42.168	22.8567	20.5451	25.1132	5.08504	5.33083	6.56461	11.2795	8.51801	11.2974	52.8664	55.4992	52.905	27.6797	30.3569	31.04	20.3513	21.3798	15.3535	28.7204	28.8041	26.6641	21.1498	19.467	17.87	6.46807	5.08351	6.08211	33.033	35.5047	38.0245	39.6752	35.6129	34.0059	19.7073	12.9705	15.3971	71.0188	69.3027	67.7268
ACAT2	61.6284	50.0318	45.6427	73.2578	55.3355	58.5442	38.216	44.2334	37.568	79.9218	70.8293	81.2196	50.0467	54.6642	50.7675	19.5659	20.5477	24.7221	57.1659	57.3273	57.7695	93.783	96.1866	97.4375	60.5029	59.2836	50.3033	50.3749	48.4689	37.0778	89.9173	88.0554	67.6012	11.488	12.7322	11.1432	30.6124	38.9544	41.3412	12.4078	14.1559	14.2044	51.5111	35.9634	41.8419	57.7797	47.0906	49.343
ACBD3	20.968	17.3808	15.9504	26.629	21.5226	22.4679	15.3001	13.694	12.3052	23.8709	24.29	25.2282	27.5018	28.4569	28.887	22.3986	21.8522	26.7578	42.7097	43.938	45.8385	32.4528	34.0917	37.2261	36.2863	37.5448	30.5173	46.7905	45.3657	39.9727	33.961	33.7255	32.4831	11.8631	12.4725	13.9523	46.072	52.1796	57.7754	18.5477	20.1957	21.3874	34.1179	24.0172	27.2203	27.2858	25.0207	24.1904
ACBD4	0.398767	0.960264	1.10418	0.843659	1.37334	0.854332	2.14323	2.17052	3.47236	3.35384	3.04219	3.38147	0.263648	0.201129	0.577645	0.963935	1.00468	0.572831	0.1228			3.77492	3.37256	1.45571	1.05866	0.406706	0.436265	1.8445	2.95382	2.40046	1.68093	1.25581	1.74866	1.65774	1.75801	1.16869	0.850512	0.387146	0.655462	1.39196	0.448142	0.362345	1.07216	0.9109	0.756318	3.91276	6.06092	5.33512
ACBD5	31.4447	30.8099	27.054	21.5542	19.1645	18.1597	13.869	13.4071	12.3465	24.736	22.4029	24.9205	10.9308	10.4874	9.44608	9.95982	9.19136	13.5497	45.412	43.2715	42.4492	18.698	16.6728	18.5331	17.039	16.8305	15.48	22.4953	23.6544	21.8901	38.4685	40.9165	36.9865	15.8181	13.6899	16.9321	9.0767	7.55614	9.77514	9.46196	10.7767	9.80274	7.94325	6.34485	7.78438	12.0073	13.2285	11.9569
ACBD6	61.5446	46.5061	39.177	39.486	34.3404	28.7721	46.8896	44.0443	46.5666	22.9561	19.0814	22.8603	18.5721	25.0655	19.7682	11.4258	15.827	14.3162	48.0213	36.0821	42.458	63.2836	52.3117	53.0179	54.2046	63.408	42.0371	28.1439	30.0407	28.7305	36.1	38.4587	29.8545	22.784	29.3906	25.3945	41.2277	45.5023	48.216	22.8933	30.9875	23.138	46.8089	30.5574	39.8052	64.104	53.4633	43.8861
ACBD7	1.81744	1.50423	1.44589	0.980529	1.06209	0.841493	2.99164	2.79334	4.18183	5.77176	8.31691	6.92944	8.72596	9.58977	8.42814	1.89136	2.55157	2.15297	0.88338	0.772897	0.189929	4.24563	4.72491	4.50307	2.23581	1.44396	1.04488	5.84411	5.1511	4.55489	0.837894	1.77285	1.09086	2.56017	2.60309	3.02642	2.14154	2.59945	2.30528	1.34433	1.32334	2.04939	1.58159	0.79798	1.07169	8.01377	6.69513	6.47812
ACCS	0.931215	1.36555	0.921321	0.467012	0.576369	0.258527	1.41095	1.84415	1.44483	0.87246	0.841711	1.35131	0.789921	1.50166	1.24501	0.323088	0.120165	0.11347	0.629337	2.62324	1.79437	1.97172	1.36216	2.99536	0.348949	0.80955	0.154818	2.24833	2.87382	1.41821	2.23647	1.81385	1.44645	4.58855	2.79755	3.17828	1.26718	2.20361	1.66916	0.528969	0.668026	0.520193	5.86405	3.97184	4.58147	7.89485	4.94095	3.94332
ACD	8.19435	22.1768	23.3625	2.6075	12.6022	11.9107	5.45996	9.17535	8.64017	11.0473	11.2268	7.36402	7.28302	3.58536	3.907	3.47181	3.1272	2.87689	3.36281	1.79155	1.47747	15.6519	9.0961	5.95113	4.3307	4.75524	9.24118	5.33492	4.50306	10.2198	9.30091	8.79439	10.4678	5.09271	6.37516	2.89449	3.90946	2.86712	2.07522	3.20422	1.66411	0.62634	3.51079	3.88117	8.34112	1.49509	6.29802	5.25919
ACER2	1.095	1.54079	1.23763	0.89257	0.72094	0.822466	1.13158	1.70986	0.97727	1.26333	1.33758	1.37896	1.04598	1.75614	1.09178	1.77525	2.54075	1.82631	0.941203	0.336971	0.349017	4.13514	3.63499	3.29874	1.41527	1.08698	1.95884	0.439833	0.44825	0.281299	3.01492	2.25682	2.76681	2.71802	3.8448	2.7848	0.94962	0.725484	0.480859	0.742341	0.638754	1.26373	0.179788	0.25117	0.356844	3.30239	3.28249	2.19767
ACER3	14.6995	12.7175	9.8583	10.1394	9.2249	10.5407	4.38269	3.70293	4.53259	5.713	5.679	5.4047	6.9917	9.0299	7.6086	1.25086	1.64204	2.70613	4.20082	4.08936	3.54061	6.2591	4.68911	3.92614	13.5494	11.8639	12.2614	13.2028	12.4562	11.0758	2.74117	2.62398	3.40597	4.27502	5.32805	4.03939	12.8841	14.4064	12.3346	5.8551	7.19515	7.1977	8.68105	7.6728	8.76935	9.41455	9.4863	7.8475
ACIN1	31.0837	24.8513	25.0346	22.4167	19.9409	17.2773	45.5205	36.7359	33.9798	27.772	28.5755	27.0242	26.0197	23.8088	22.3424	29.5188	33.7029	28.6671	16.628	18.4098	18.2273	30.237	28.4994	29.2504	30.4089	29.5013	23.1187	24.7305	21.8614	20.8688	19.1659	22.906	21.3315	28.0519	23.2136	20.3814	25.5472	27.263	21.395	30.6626	38.0429	33.7559	29.7312	30.4947	30.479	9.94392	10.9864	7.087
ACKR2	26.2127	20.581	22.7366	0.0391758			3.05749	3.69216	3.63014	0.0147401	0.0141077	0.308998	3.92102	1.68302	1.61403	2.48374	1.22412	1.66463	0.160606	0.0282952	0.015522	9.46016	8.16206	8.4113	24.9999	21.3023	18.4676				19.6777	20.9342	18.1897	0.992621	1.22555	0.535124	0.0263171	0.230388		19.0908	16.613	13.293	0.506029	0.177193	0.0140885	0.394403	0.445324	0.412241
ACLY	18.1483	22.7354	21.3094	38.3063	45.5095	44.8414	36.1045	37.8291	34.3244	24.2388	23.2163	20.7447	50.844	45.2154	44.9398	24.8743	21.5764	23.9388	35.2991	37.4633	32.0033	38.4062	32.4875	26.7701	34.8885	29.4078	36.8251	40.9271	41.0994	40.98	31.0164	32.0418	30.3197	21.1439	20.2691	16.7808	35.7721	37.3474	24.3849	102.216	84.3095	76.094	18.0174	12.5388	20.1868	43.605	47.2268	39.9592
ACO1	19.6908	15.7594	16.6892	32.3398	29.2711	24.1263	19.5262	20.3245	18.9349	23.5632		22.1176	11.4364	11.4454	9.55181	8.22494	7.21278	9.1959	22.4882	22.3464	21.1644	20.4252	20.1321	18.6012	15.4541	15.0839	13.6681	11.4123	11.1291	9.53801		36.8109	32.809	7.33267	8.3673	8.90534	11.8802	13.4975	12.7919	0.48669	0.41157	0.739788	15.2173	11.5731	13.0507	14.5005	13.6414	13.3261
ACO2	10.6296	20.3366	18.4395	21.0312	37.782	38.7459	31.3372	40.9747	34.5688	46.6257	42.3907	33.2126	24.6047	21.0898	19.0937	38.6984	28.5082	33.2729	66.7319	57.4509	45.0123	38.4801	28.4827	23.5935	17.2886	12.6602	21.2898	12.6667	14.1721	18.8462	53.626	51.2375	57.507	22.7093	23.0032	16.8775	38.7082	29.5461	18.7166	46.5618	26.9734	27.0155	8.15462	7.61683	15.4995	22.6079	31.293	29.4646
ACOT1	1.38332	1.49624	0.828107	11.881	14.2879	15.4492	3.16905	3.2188	3.0792	2.1143	1.57737	2.47008	1.14052	1.27831	1.20095	4.82361	2.92028	3.25885	1.08218	1.86027	1.09651	6.0038	6.21472	4.29796	1.10318	0.790616	0.728462	2.61294	3.17703	2.67526	1.62806	1.38249	1.06694	1.59992	1.82028	1.48463	2.69304	3.29749	3.49445	5.72754	5.15157	5.48061	0.46198	0.280252	0.254077	10.1287	11.9975	7.61608
ACOT11	0.181431	0.642368	1.12043	0.0381247	0.163877	0.0549613	0.0526288	0.114977	0.149808	0.189513	0.229501	0.15101	0.152199	0.103966	0.125554	0.336032	0.251501	0.355382	0.36689	0.267192	0.115388	4.40614	2.05663	1.51543	0.328386	0.390954	0.686802	0.247553	0.588803	0.695211	6.30356	5.52315	6.11805	0.175184	0.184686	0.174696	0.371195	0.0683235	0.180993	0.591876	0.268251	0.165099	0.428479	0.594621	1.21348	0.0681099	0.0835581	0.0340299
ACOT13	5.04161	4.80986	6.12382	22.3511	15.8744	17.9038	21.8214	23.996	22.0893	11.9795	10.3342	9.75722	12.4488	15.6499	14.693	13.0066	15.2946	15.7426	17.8051	15.359	17.3061	27.7227	27.5995	30.6992	24.0399	22.7174	18.7508	18.1326	19.0898	15.7566	15.9411	11.1483	13.4254	8.26477	10.7023	12.591	12.4838	14.0267	23.5559	10.1268	12.9633	12.7748	12.3568	7.98338	10.7953	13.6599	9.61889	15.4845
ACOT2	2.25654	1.72634	1.53397	18.969	20.2843	19.4354	7.18727	7.727	6.73511	5.0891	3.90186	5.59124	2.56753	2.48032	2.20979	6.85944	4.20124	6.18174	6.72409	7.3976	4.15957	8.20167	8.61695	6.19992	1.34396	1.04141	1.2241	3.39118	3.75219	3.46196	3.69043	4.11313	3.67401	3.3281	3.58042	3.77132	8.57628	10.287	8.54572	7.08857	7.13174	6.90878	2.38175	1.04703	1.93511	13.924	12.6661	10.5336
ACOT4	8.09745	6.03406	5.52339	3.89622	3.66557	2.95474	1.24479	1.19777	1.52227	2.63033	2.02289	3.05021	0.50129	0.750559	0.610466	3.06434	2.60891	3.47606	0.398811	0.334791	0.521859	6.50808	6.85827	5.65991	0.15848	0.18199	0.115641	1.58789	1.60499	1.55107	0.958875	1.42167	1.26097	2.99688	2.77116	3.13475	2.19217	2.87508	2.106	2.22454	2.85111	2.82525	0.83717	0.591084	0.895106	17.8739	15.684	13.4643
ACOT7	3.58246	8.54479	10.2322	9.30432	26.4916	26.4273	17.7982	23.9788	21.6137	35.0618	29.3799	23.6039	17.0262	12.2749	14.1909	26.0017	20.953	17.7126	4.20883	6.14036	3.35394	33.457	18.4015	9.37684	10.376	9.49796	17.9248	10.2545	12.404	21.0936	22.1551	20.0668	29.1129	14.7858	12.2569	8.45413	27.9078	15.802	7.52435	30.7173	15.1059	16.8434	2.45155	3.11162	8.81684	6.16751	9.92615	6.91953
ACOT8	12.8062	17.9554	17.4578	6.11568	10.907	11.2194	3.15365	5.00027	5.19212	11.58	7.89477	7.02997	2.95837	2.15213	3.71106	17.7124	14.1037	17.7589	12.2135	14.4094	11.1986	12.3287	12.0103	3.74165	6.83194	4.26697	6.78532	9.17654	12.2999	11.2229	7.63008	6.87441	7.96343	6.61936	7.28171	4.51167	9.07233	9.25689	4.52752	13.3344	6.44796	7.27409	3.68807	5.17898	5.54733	16.3202	21.0644	22.07
ACOT9	36.7352	25.3125	25.1027	52.3051	44.1941	38.7566	16.1753	19.7661	17.2683	14.4287	10.8057	11.889	5.11188	6.72182	4.94456	1.50388	1.54706	1.58416	0.324938	0.0391318	0.0813498	30.3778	27.862	31.256	73.8507	69.9067	63.8689	17.825	14.5662	13.8821	15.4536	12.3283	12.5244	7.81865	8.2552	6.80905	66.4163	75.03	88.384	5.76998	7.11181	5.28056	53.7253	37.6374	40.608	24.1279	21.2711	22.1387
ACOX1	32.2899	29.2874	24.5076	16.5936	12.6332	12.728	15.0982	13.2123	12.7664	26.6602	26.284	24.8712	25.8996	23.3786	22.9857	39.2022	36.7093	42.0065	22.295	20.1313	19.5342	28.9912	30.0017	26.2151	38.3007	36.8138	33.9311	15.7211	12.2577	16.8545	21.2782	21.142	15.066	22.6728	23.8199	20.7401	52.0471	58.8114	55.1737	37.8757	49.7032	38.4145	11.6057	8.87015	8.79588	57.8984	54.6921	51.6275
ACOX2	0.405962	0.0995657	0.349853	0.272516	0.0957696	0.0439055	5.30204	6.91426	7.43002	0.191512	0.318489	0.329438				41.8775	40.0297	60.2223	0.528643	0.408106	0.711476	5.91638	9.41585	7.23816	1.73489	2.11309	0.871123				0.233862	0.858639		0.59177	0.678158	0.662769	2.12981	4.31717	3.19383	2.66725	2.03741	1.92549	1.45791	2.26765	1.79453	74.242	48.6561	44.3895
ACOX3	5.66528	2.89714	8.57706	9.29525	9.13181	10.6571	7.06538	6.01988	6.95035	2.02139	1.39996	1.75794	12.6158	13.9555	6.83407	20.3533	13.1463	12.2768	5.24338	3.95541	9.15391	7.10791	7.75808	6.41062	10.3492	8.10042	6.82645	7.76985	9.47706	6.96411	6.04488	9.55682	8.44713	8.87239	4.83972	6.78326	9.07351	7.86056	4.90282	3.29445	1.83466	3.63207	2.9744	2.66007	0.796939	4.55217	7.75452	8.30674
ACP1	130.202	138.985	134.27	22.6113	19.8471	18.8496	58.0443	55.9802	56.4527	70.0655	58.442	69.0229	28.9757	33.2944	29.6365	8.79828	11.2687	10.6686	43.9031	36.9655	34.0822	59.3226	56.865	51.1873	47.6146	48.9821	49.6192	55.657	59.4982	46.8953	33.4087	32.1762	28.2761	32.6307	34.6173	35.6082	63.6518	68.7899	58.5701	38.6022	43.8022	38.559	61.5796	48.1177	66.5371	33.4127	29.2717	25.6739
ACP2	5.4401	7.82663	8.10756	9.77559	13.5358	13.6888	10.2126	12.2716	10.1244	5.44658	4.0483	5.12207	24.456	21.0614	19.8154	20.8252	18.1587	16.4391	6.24124	6.87935	4.34665	9.14194	6.99346	6.03005	8.49291	6.44669	9.54544	22.0674	22.1218	26.7731	11.6841	9.70026	10.7629	7.257	5.29635	7.58946	10.3516	6.92341	5.74235	21.932	12.3245	10.4217	5.8771	3.68331	8.61794	9.29287	12.5017	13.2479
ACP6	5.20395	3.1581	5.03155	0.830975	0.314263	0.379936	2.76599	2.95329	4.07384	6.03045	5.45195	8.14535	4.33994	3.97058	3.56826	1.71009	1.47466	2.89208	0.964565	0.953065	1.18494	7.4308	7.8776	8.75535	6.44205	8.76625	7.4213	2.75545	2.45459	2.88322	8.16	7.9914	7.62115	3.85064	2.91391	3.44437	1.38163	0.82246	1.04106	2.53323	1.7036	1.3401	2.86038	3.28981	2.96235	3.00139	2.54551	1.55582
ACPL2	8.0405	7.80765	3.58601	4.58896	2.2463	1.92538	10.3023	11.5796	9.91992	4.57012	3.82275	6.3963	6.55342	5.52607	6.35715	0.20614	0.0984101	0.236926	3.05746	6.24935	3.1554	6.86497	6.39323	4.35892	11.2002	9.99616	8.66295	8.86146	6.75913	7.16072	6.67962	8.72886	9.36881	1.87945	2.22773	2.41935	2.51659	3.20908	3.80684	2.17097	1.37181	2.1506	22.76	20.1401	23.3895	7.66644	7.48809	5.3976
ACPP	4.12825	2.03109	1.50235	0.117106	0.118811	0.21832	1.62887	1.32602	2.13584	0.07626	0.0728188	0.39885	0.080461	0.140915	0.0290133	2.36074	2.50513	3.171	1.17937	1.11506	4.03234	1.27715	1.60374	1.97089	2.36325	3.4387	1.51498	0.452003	0.492212	0.158644	5.93026	4.70704	4.61468	2.39041	2.31729	3.38365	0.216246	0.363748		0.706762	2.75025	1.05807	0.209271	0.108172	0.918183	0.594554	0.667299	1.1342
ACRC	0.591509	0.300681	0.119023	0.459677	0.462907	0.212926	0.244717	0.216388	0.563281	0.503819	0.306812	0.153613	0.525069	0.675094	0.723834	0.564143	0.468434	0.367411	0.656631	0.427608	0.257148	0.108616	0.317133	0.282999	0.486532	0.339944	0.343083	0.178665	0.316307	0.732565	0.177171	0.239011	0.0733925	0.199611	0.161431	0.361211	0.636579	0.871249	1.75935	0.241849	0.32818	0.200859	0.0740038		0.0583531	0.436262	0.220571	0.228433
ACSF2	8.86015	11.2095	9.5646	2.13499	3.52111	1.54127	5.73804	7.60953	6.69568	23.9513	21.6852	25.6171	11.3804	7.32531	9.16479	5.3627	4.16314	2.93016	34.2622	45.7681	37.9849	44.5434	36.129	37.3503	15.7918	13.0819	13.329	12.0021	15.7028	14.4952	15.1493	12.4921	13.6189	13.6729	15.7353	11.3325	6.54657	8.9274	7.94361	9.68472	10.3338	6.85979	8.4516	9.29381	10.7166	13.2296	10.5517	9.04494
ACSF3	2.40629	7.56975	5.9466	2.72731	6.17209	3.96684	4.27458	8.19348	7.33792	7.27138	6.47412	4.22397				2.96234	3.94586	2.68334	3.92224	1.91094	2.79864	10.8138	6.38396	4.72706	7.06037	4.04812	5.388	5.37583	5.22096	9.73535	7.34788	5.54822	6.51127	8.01125	12.4686	9.11958	1.87761	0.854045	1.03798	0.0228911	0.233284	0.0691196	4.81863	5.25503	5.46284	3.92453	7.82754	6.94842
ACSL1	33.4662	28.6778	26.3476	15.3307	11.7894	11.888	6.4607	7.23615	7.04299	25.475	24.5705	26.6471	7.36808	7.06151	7.44497	36.6208	37.9451	39.0407	47.9723	46.2813	44.4209	66.6186	70.5675	72.9534	38.0705	36.1659	31.3563	33.4235	31.8228	26.5014	124.653	119.368	103.188	6.28247	6.93624	6.70771	9.06324	10.1059	10.1276	31.658	35.9491	33.809	24.3934	22.885	21.8382	48.8948	49.545	42.7769
ACSL3	31.625	26.353	27.2154	47.3239	35.5757	33.8398	43.8081	36.1488	39.0934	88.7569	86.3099	108.87	71.5688	73.2631	71.4621	117.119	129.324	141.783	68.3493	68.7036	65.1069	67.6098	62.6181	64.6439	60.8198	65.005	58.435	135.989	133.077	119.168	57.4387	55.5158	45.1292	46.3429	46.7324	47.2224	27.0058	29.2035	30.1244	40.4069	49.8792	48.6693	30.188	30.7196	28.6872	29.8489	30.6604	28.1932
ACSL4	58.3484	47.7039	46.9954	122.923	98.752	96.5448	7.43206	5.31756	6.90773	9.7255	9.77315	9.97097	4.25791	5.47378	5.44076	0.244917	0.588205	2.41495	18.1454	17.3707	18.7851	18.4631	17.7853	22.8365	27.1497	27.8493	20.8924	29.0951	26.5387	23.6727	16.9542	16.3829	16.7515	0.251312	0.444602	0.426233	27.955	30.5244	32.2214	0.145892	0.121175	0.139604	17.5879	13.7583	16.0547	4.07766	4.12287	4.36543
ACSL6	0.0867265	0.00322523	0.00551455			0.0260826	0.0025166		0.0368416	0.0437094	0.00872396	0.0121958	0.444976	0.40144	0.154394	0.339633	0.24931	0.0484296	1.41108	1.61544	2.50088	0.0396647	0.156967	0.060494	0.0825919	0.0708092	0.117855	0.126039	0.249472	0.500427	0.000853668		0.00143245	0.00109454	0.00453719	0.00493481	0.267426	0.434881	0.534876		0.0224925	0.0433157	1.44979	0.738449	1.15654	0.325015	0.318798	0.47419
ACSM3	0.312479	1.24663	0.372755	0.0670325	0.0309472		24.9509	32.223	33.9479		0.0882152	0.0993466	59.8931	54.2795	55.9396	1.44819	3.05024	2.80577	2.41037	2.40276	3.1299	1.32543	1.26445	1.41364	0.222336	0.152391	0.431303	1.71843	3.1172	2.04613	0.0371767	0.29268	0.135436	1.90747	0.530974	1.06675	1.7293	2.64225	4.03041	1.63528	1.47915	1.76975	1.19312	1.37258	0.245242	10.5276	7.54959	7.57482
ACSS1				0.194016	0.279569	0.536276	1.12186	1.03196	0.975235	2.3593	2.19427	2.33606	1.00638	0.552705	0.738512	23.7985	18.8723	19.2224	19.436	21.397	14.5064	0.39175	0.387664	0.302455				0.653484	0.713155	0.867137			0.0179485	3.3999	3.47882	2.44999	4.70576	4.65769	2.32247	0.335886	0.232408	0.236795	0.0109607		0.118395	2.38657	3.31489	2.28086
ACSS2	18.1756	16.6296	16.5157	16.7702	14.5924	13.0956	12.2505	11.0183	11.2387	36.8839	32.1803	33.3954	12.3037	11.4743	9.82663	13.7238	14.5207	16.6837	19.8116	22.8608	19.791	53.6436	55.1292	42.8245	17.277	13.9742	13.8033	21.0674	21.2261	17.7369	62.3369	61.5564	51.7586	4.42144	5.34055	4.44713	12.081	18.5787	13.3065	27.131	27.6729	24.3113	17.8008	20.1256	15.5779	15.436	12.5853	11.6189
ACSS3	0.0561628	0.101726	0.161181	1.59932	0.486888	0.11056	0.230018	0.135336	0.00872012	0.525757	0.545982	1.12491	1.21531	0.752799	1.40768	0.0690548	0.0741085	0.981819				0.0527763		0.00787323	0.0170547	0.0264919		0.673755	0.503194	0.689153				7.96162	7.82751	9.76029	0.592516	0.468824	0.600767	6.61423	8.08791	7.09874	0.289825	0.778807	0.037746	7.31819	7.33479	6.27557
ACTA2	0.987851	1.25269	0.705103	352.824	310.537	273.094	8.33066	10.8707	9.11759	29.9708	31.1371	28.876	27.1151	31.2323	24.6619		0.102285		8.968	7.59081	8.17108	1.16934	1.4112	1.18847	3.22842	3.28534	2.48392	9.12953	7.80713	6.25894	1.57728	0.992986	1.06416	1.23305	1.77151	1.32264	61.2447	87.3918	69.7967			0.317183	0.239963	0.162167	0.202331	53.7593	47.8943	38.0487
ACTB	4913.25	4346.84	4118.71	4098.46	4037.34	4523.47	2321.65	2621.1	2453.71	1866.05	1747.7	1676.88	2437.83	2056.57	1817.76	2434.89	1910.84	1702.1	1244.79	1283.52	1303.23	2446.48	2663.62	2925.22	3468.39	3728.37	3344.92	1233.78	1200.32	1220.99	2171.35	2088.88	2108.75	1242.79	1172.37	1199.75	3593.06	3493.38	4107.94	2513.72	1902.73	1896.28	1127.77	912.345	1075.06	1533.1	1376.15	1553.39
ACTBP2	0.648731	3.13097	2.93654	0.859827	3.82995	3.51377	2.44449	2.47937	2.63509	2.70148	1.9694	1.64314	2.02928	2.63047	1.78527	3.97396	2.27441	1.79002	1.56637	0.426775	0.559099	2.27477	1.22651	0.584237	1.0505	1.14875	2.08809	0.601888	0.960849	0.775733	2.60647	1.76883	1.98709	2.52609	1.8736	1.07348	6.06818	2.45131	0.719388	2.85949	0.917846	0.853578	0.302322		0.551809	0.451199	1.71866	1.9352
ACTG1	193.698	228.282	229.595	442.089	627.7	693.065	289.866	404.548	343.174	945.275	773.155	674.735	1055.53	729.14	734.01	270.596	176.803	152.97	274.596	236.761	169.812	352.245	277.93	229.048	501.795	455.822	544.03	534.885	560.115	612.895	130.872	123.274	139.791	728.355	636.095	459.95	1369.45	945.07	635.915	144.015	78.9765	78.4645	369.911	262.787	454.143	197.5	269.841	249.039
ACTG1P1	0.128824	0.345454	0.306988	0.194036	0.268485	0.0821122	1.07446	0.518375	1.06039	0.35769	0.212589	0.148353	0.313497	0.309964	0.151976	0.587802	0.255724	0.211647	0.359007	1.05964	0.185102	0.118895			0.193175	0.183996	0.398793	0.239104		0.453213	0.328153	0.204262	0.604162	0.887702	0.592095	0.310974	0.0792937	0.558609		0.310606	0.124301	0.312333	0.171572	0.202686	0.168629	0.16295	0.247797	0.45523
ACTG1P3	0.4809	0.976661	0.741827	0.0790083	0.18213	0.167078	0.809983	0.131866	0.183621	0.0910066	0.735481	0.301875	0.546818	0.630664	0.154621	0.726229	0.476959	0.645933	0.486974	0.215614	0.329518	0.241981	0.119939		0.0393228	0.187246	0.162309	0.689279	0.849503	0.829878	0.259639	0.498809	0.163892	0.746141	0.301162	0.0451918	0.201713	0.568685	0.470377	0.902972	0.843158	0.77167	0.392764		0.557554	0.0414463	0.196042	0.205812
ACTG2	111.522	115.982	112.34	0.116359	0.464722		4.67078	3.63778	4.40766	24.6409	20.0266	19.3613	0.0337903	1.18485	0.114785	1.03997	0.8783	1.34542	9.74155	7.8541	8.99782	0.108357	0.0296477		0.785562	0.904953	1.48096	0.150423	0.15025					0.185123	0.0952396	0.134483	1.21393	0.324911	0.253579		0.12505	0.168678	0.194328	0.122601	0.286798	0.0615455
ACTL6A	117.178	98.0283	86.0635	66.7476	46.4215	49.3566	48.4704	46.874	42.3687	74.183	67.2265	77.2141	33.2545	32.7104	29.7937	22.8799	24.5159	28.3787	80.2302	79.5293	80.2111	136.12	138.312	142.917	107.151	105.192	93.2379	76.6336	71.8673	63.9765	100.981	97.5646	85.9481	46.2189	49.4773	51.946	40.3938	46.8598	53.0118	27.9922	32.2379	69.8009	53.7605	40.7405	47.9788	177.513	171.789	142.704
ACTN1	279.484	262.739	237.159	175.795	157.39	143.572	90.5546	89.667	83.1388	246.066	249.445	222.596	90.2102	80.5957	83.4265	20.6651	18.1581	25.2042	61.981	79.9269	74.6884	145.429	124.396	112.439	238.482	189.656	210.171	124.266	119.165	112.323	82.7959	94.6577	88.9464	45.6729	44.7158	38.8391	137.567	175.224	118.325	34.739	38.5308	30.6054	88.5288	67.9496	82.7117	31.0722	35.2014	23.0818
ACTN4	266.525	272.948	286.8	198.072	230.716	250.791	197.97	227.416	219.17	501.92	483.151	404.861	132.929	124.658	111.97	247.155	191.947	186.569	117.618	119.648	109.289	184.03	144.458	131.827	201.526	168.604	212.432	140.26	147.735	165.116	195.063	188.748	218.084	129.248	120.174	95.0082	235.452	204.116	151.645	187.024	110.271	110.635	68.2922	49.8069	77.8431	32.5662	43.7869	38.035
ACTN4P1	0.0310844	0.362875	0.392589	0.0562943	0.555231	0.330464	0.23181	0.441474	0.264288	0.520789	0.496529	0.352556	0.130875	0.0324304	0.259348	0.214745	0.530419		0.0292072	0.186032		0.0577809		0.0301679	0.056176	0.107246	0.262122	0.11652	0.116398	0.066426	0.320667	0.447547	0.265669	0.225557	0.123971	0.0976863	0.260421	0.0867187	0.0920659	0.550946	0.0908068	0.13068		0.0593647	0.0308589
ACTR10	26.7291	27.3513	20.5867	28.1717	22.7454	24.3973	25.1933	24.6152	21.8292	40.1082	40.6375	48.3296	20.0525	20.0444	20.0737	11.9775	11.5867	10.8292	14.8261	15.2353	14.9032	33.4781	32.9258	32.6227	31.0801	30.1985	27.5406	70.5567	67.7959	55.3426	30.5927	34.9809	28.8522	23.2094	27.9232	28.9998	26.3178	28.5753	25.7272	12.9937	18.4353	17.3808	27.3164	22.9265	23.0222	37.1565	41.2402	33.4842
ACTR1A	17.6879	18.8724	17.7702	101.505	107.07	104.302	51.3895	55.6022	46.2634	48.8134	43.6135	43.3129	47.6615	42.0071	42.2399	24.0398	20.8193	27.409	28.4349	27.5747	26.4144	35.1862	34.2069	23.5443	37.9398	28.0991	31.5017	32.6704	31.6435	32.0742	34.7471	30.4589	31.0864	30.9725	30.2169	29.4539	63.1334	71.4644	56.811	17.1437	14.9333	15.4836	23.1595	13.659	23.9016	60.6343	64.6128	54.5779
ACTR1B	15.6395	34.5261	37.9749	2.06515	6.08923	5.56188	10.5201	18.7521	15.8093	19.0008	14.1381	12.6501	11.6893	9.33934	8.2063	11.3787	9.38636	7.6259	24.7504	20.234	9.49467	13.1691	9.5593	5.1379	7.68744	5.97168	10.8947	7.27429	10.8348	14.6053	20.7798	18.5086	20.2522	21.102	20.4869	15.2645	7.10391	5.33481	2.08056	8.6229	4.34478	3.63181	1.28036	1.39894	3.98416	9.83976	13.7732	13.7989
ACTR2	106.048	86.8961	80.9295	51.7501	40.1279	43.0035	62.5723	56.9053	56.1146	95.6872	99.4317	109.215	48.2704	44.9365	52.2574	49.4858	50.5898	55.2594	71.5666	72.6289	78.5951	64.4883	74.3424	84.0867	64.4306	72.7405	58.0108	48.3157	52.261	47.3239	50.5579	56.1158	58.3741	38.404	36.936	42.301	167.694	170.331	183.335	62.6163	75.9408	74.0063	44.1047	35.3821	43.4162	34.2477	41.1776	31.934
ACTR3	261.606	210.857	195.678	182.885	145.746	145.446	146.001	140.474	140.479	157.496	146.075	170.231	94.9467	96.2921	96.3535	58.6161	60.131	69.5064	144.83	137.21	140.341	175.116	178.594	184.841	262.979	247.367	206.448	154.506	154.43	137.687	126.066	123.922	107.937	50.3045	50.6563	56.8986	160.397	186.839	206.287	68.833	81.1408	74.3567	91.3423	70.0104	81.9556	63.1808	55.0797	50.6683
ACTR3B	7.85566	4.66982	4.80166	6.62118	2.6891	5.78269	5.94096	6.86312	8.197	5.56922	6.86676	4.93505	4.22202	4.93998	6.95471	1.46732	1.4286	1.56027	12.814	10.2062	16.4398	4.70416	3.27879	2.67123	7.55407	7.26437	3.86316	2.68556	1.75771	4.18806	4.16921	2.9214	3.44	2.74315	3.01779	5.8989	3.91185	3.93528	1.7485	2.89003	1.77095	2.53113	0.660598	1.39451	1.32079	6.02929	5.38695	3.38312
ACTR3C	7.65743	5.8564	6.26539	0.158079	0.223267	0.203222	1.36307	1.42548	1.38217	3.53012	3.19655	3.0582	2.50029	2.86817	2.69213	3.24953	3.3589	2.50858	4.24611	5.3155	4.51754	7.40935	6.90238	6.51519	2.49756	3.25627	2.13139	5.15667	4.52403	4.09129	3.30793	4.45689	4.21271	2.65796	2.8411	1.99307	0.0899119	0.239013	0.424995	0.688613	1.40758	0.903575	1.18715	1.37764	1.24708	3.53884	3.87176	2.74755
ACTR5	6.48385	7.52736	6.47572	4.15547	4.06656	3.50553	2.34388	2.60521	2.63803	7.7893	7.05421	7.07787	2.5672	2.9439	1.8134	6.74081	5.80353	6.54832	12.016	12.8553	10.3988	4.40123	3.95055	3.48269	3.2211	3.33998	2.98724	5.43596	5.24365	5.27966	2.55702	2.07025	2.18102	3.28402	2.68385	2.89925	4.08226	3.61382	3.68414	5.45585	6.5766	4.46702	3.92143	2.22688	3.26626	4.91656	4.20434	3.46099
ACTR6	23.4321	23.9722	15.108	16.3685	11.9255	16.9402	11.3246	9.07394	8.63699	34.2883	32.8215	41.6377	25.848	28.766	23.1972	14.5402	11.6205	12.8919	41.3529	41.5706	44.014	17.9517	17.8393	20.0335	24.9943	24.2746	21.0547	41.3591	39.1039	33.8748	20.6069	22.1125	19.3268	12.9917	10.7981	15.2841	11.6054	9.20411	11.6791	13.5715	11.9459	20.4404	27.5772	24.9631	25.2905	25.8862	25.7634	19.3731
ACTR8	12.3662	10.5057	10.3936	16.5226	15.8228	11.855	12.2051	17.3656	14.3336	7.95804	8.52544	10.9373	13.4123	16.4076	14.0206	13.7114	14.2687	14.7139	13.6561	14.4834	21.2846	20.5762	20.75	21.3272	18.2372	15.5979	11.8221	10.4495	11.2417	10.6492	6.39799	8.50011	6.85097	5.8306	10.6314	6.57983	8.38114	10.2548	9.81045	13.5815	17.89	12.0536	12.485	8.1711	12.7011	10.7325	6.21397	5.90687
ACTRT3	1.09581	1.15885	0.670766	0.477845	0.289875	0.493321	1.73732	2.21772	1.67343	0.199554	0.360177	0.166897	0.0447115	0.199854	0.101354	0.0209638	0.0427126		0.0399893	0.0212084	0.20923	2.60079	3.04035	4.1306	1.62449	1.69974	1.51195	1.29435	1.35405	1.84307	0.384477	0.468762	0.364037	0.308211	0.297257	0.200804	0.217292	0.352976	0.251524	0.221388	0.103406	0.223651	2.85183	2.66199	2.11204	1.9567	1.67736	1.57615
ACVR1	9.11806	8.79969	7.18129	9.88988	8.62668	7.09083	3.69077	3.04908	3.49674	7.2345	7.02324	6.76631	6.42428	7.15246	6.58822	3.16574	3.57693	3.46903	10.3511	10.7043	9.52549	4.12193	4.30664	4.08921	13.2937	13.1739	13.6637	7.78394	8.01689	8.23121	9.49825	10.1355	10.4707	5.66465	5.556	5.76422	8.26776	9.48725	9.24346	2.76447	4.17528	4.69205	8.09285	8.04795	8.10862	3.14995	2.89351	2.42918
ACVR1B	3.48574	2.31125	3.20626	2.7948	2.23477	2.73889	6.81767	6.87155	6.95173	4.92837	4.59816	4.19993	7.97606	6.21454	6.71361	3.60735	2.49664	2.43038	4.18979	3.9009	4.23133	5.56598	3.07117	3.27068	2.95917	2.15545	2.36862	6.38377	4.49477	4.71429	4.48367	5.26632	4.3997	9.62984	9.38141	8.37657	2.50459	2.51429	1.7657	5.07779	5.00874	4.38728	2.45205	2.10614	3.7798	6.83607	7.20379	8.06702
ACVR1C	0.581582	0.624452	0.389755	0.0894321	0.0254103	0.118027	0.068228	0.106444	0.0181643	2.17532	1.13377	1.78242	0.12554	0.140504	0.0609648	0.0466257	0.0738591	0.218387	0.0666464	0.0340273	0.211271	0.0117937	0.00785312		0.266817	0.25796	0.135406	0.0363053	0.0239773	0.0228787	0.332626	0.670761	0.2331	0.0995096	0.0489482	0.0538565	0.033676	0.0077551	0.00838562	0.0734266	0.0206976	0.0134751	0.226917	0.26693	0.178079	0.0571396	0.128051	0.0409389
ACVR2A	15.0659	11.1359	10.0511	2.72443	2.51031	2.03793	4.51108	3.41688	3.98818	2.54173	2.49949	3.53528	6.87537	7.88427	10.8061	6.06417	7.32604	5.94862	9.50338	10.9683	11.4	5.50333	6.24513	7.32126	14.6761	14.5709	12.9389	5.7151	4.63214	4.14065	4.31831	4.95526	4.27451	6.84396	6.69482	4.81609	6.50924	6.79434	7.66278	2.09066	2.6225	2.09076	5.04296	5.15799	4.33287	3.77267	4.4145	2.43715
ACVR2B	0.563752	0.764533	0.843496	0.400206	0.486829	0.415029	6.4692	5.72003	5.78003	2.1928	3.25461	2.16308	1.53486	1.24075	1.08736	2.23089	2.50065	2.50716	2.01529	1.95104	1.66426	0.693478	0.590723	0.630534	0.829017	0.860419	1.29812	0.966021	0.800262	0.968392	1.37436	1.20334	1.48172	3.9526	3.1314	3.60529	1.18113	1.36938	0.934495	2.64227	2.4083	2.5638	2.38701	2.49837	2.38481	1.13597	1.12554	0.851474
ACVR2B-AS1	0.0324792	0.234683	0.0444805	0.132673	0.15518	0.12729	0.0610028	0.0333004	0.140073	0.35966	0.196595	0.301359	0.103761	0.395501	0.0980488	0.0486533	0.28109	0.164398	0.046445		0.450243	0.197958	0.0910425	0.158734	0.132786	0.112978	0.092323	0.169484	0.323712	0.22912	0.184362	0.362571	0.313313	0.19371	0.312476	0.397516	0.229116	0.166283	0.275588	0.0342478	0.0159979	0.0865854	0.464589	0.534963	0.408783	0.220854	0.204144	0.177262
ACY1	8.01652	19.7132	17.1235	2.22042	7.22233	5.8677	11.1556	15.6063	13.4778	20.445	16.2102	17.025	4.86654	5.15466	4.33868	20.0489	15.8926	17.3976	11.2732	10.6187	6.38536	25.3383	18.9683	9.81838	8.03604	7.48443	10.03	15.5685	17.4276	19.8888	22.0908	16.5753	16.9567	5.03145	5.75822	4.75663	5.46132	3.50228	3.89456	19.0948	9.9264	9.5551	3.57997	2.86636	7.71045	31.6031	48.9222	44.1522
ACYP1	5.7409	7.67554	5.37008	24.228	20.0544	19.7431	8.38656	6.82048	7.15905	2.75707	4.51576	5.05199	3.58525	2.59603	2.79356	2.56282	3.36216	3.36398	4.04872	3.65528	3.52718	11.7386	11.0534	14.5421	10.0329	9.16664	9.92718	6.12049	6.87073	6.07853	11.2143	16.0639	12.7953	5.86278	4.62175	4.32632	12.4153	11.5524	11.7461	4.34161	3.76596	5.65355	5.8774	4.23085	4.59887	6.56443	7.799	7.75849
ACYP2	15.066	11.7623	9.87088	3.92067	1.61149	1.82836	2.83362	2.35189	2.47027	4.79695	3.8598	4.97712	2.33159	0.700971	0.783199	4.74119	6.13818	4.94753	5.36366	2.42504	4.925	11.5082	11.8053	9.2579	2.49309	5.1342	2.00321	4.4189	4.62764	3.92248	4.4662	4.28556	3.33266	3.06524	1.52334	3.65689	11.127	12.5435	12.1516	1.60581	3.80874	1.81737	3.42673	2.89308	2.0231	0.613135	0.901296	2.82022
AD000090.2	2.04847	2.59144	2.55817	0.954295	0.452994	0.967503	1.8132	1.62807	1.78891	2.34686	1.91149	1.61411	0.988692	0.96655	1.19887	0.998725	1.20759	0.722848	0.738843	0.505002	0.827882	3.29465	2.36206	2.21938	3.86278	2.87669	4.15478	3.96641	3.9229	3.19451	0.570507	0.661831	0.82574	1.45519	1.03917	1.24693	3.85566	2.92543	2.5523	1.97255	1.76768	1.29088	1.67161	1.68246	1.81114	2.92752	2.64076	2.61426
AD000671.6	0.0696531	1.08527e-69	0.068446	0.134672	1.4846e-29	0.106382	0.184584	0.415853	0.180728	0.607209	0.0837957	0.212263	3.88517e-42	1.55056e-41	0.242811	0.0608087	7.92082e-48	4.59147e-49	0.0653013	2.34737e-25	3.83082e-45	0.0959945	5.74714e-27	0.0781012	1.79004e-25	1.63338e-24	0.0576209	3.2933e-31	3.72743e-85	0.07295	3.44792e-25	2.22893e-24	1.53254e-50	0.1745	0.0676627	7.20315e-48	0.23622	7.2757e-39	3.23391e-45	0.0978645	2.10629e-36	0.080698	6.41486e-113	6.48707e-121	2.50178e-28	0.10461	0.14324	0.323193
ADA	6.71661	8.84379	7.97584	2.0834	3.4979	2.53276	4.71185	5.85252	6.48581	8.59846	6.25322	5.8907	9.00606	7.22312	5.5459				5.1726	6.65624	5.05988	8.39713	6.60729	5.5017	3.11317	3.05354	2.66654	20.8786	19.9949	20.2376	12.8595	10.8236	9.37684	1.48837	1.10169	1.00147	18.7769	16.7353	12.2245	0.482951	0.253735	0.529164	2.67738	1.97237	2.37184	2.64555	2.15667	2.18819
ADAL	16.6486	14.2074	12.8554	3.37907	1.47692	1.45144	6.28904	2.88472	3.9762	4.73062	6.73042	8.03789	2.82556	3.00915	2.37594	4.29346	4.07359	2.81692	3.23153	3.74297	2.91222	6.98411	9.586	8.57271	0.301149	0.21913	0.21436	4.59798	3.25655	4.00069	5.58262	4.77824	5.1185	3.0292	2.86631	3.33371	6.44329	9.85376	8.50101	4.25003	5.97984	5.83411	4.68935	3.73266	3.64667	10.2105	10.2962	11.5619
ADAM10	143.873	108.595	101.493	37.3042	29.8405	30.1709	139.85	121.778	134.729	84.1309	84.8793	83.5128	28.237	26.08	26.9572	20.3999	23.2584	26.2802	54.0771	52.8693	54.7115	87.0823	85.6389	93.88	95.14	94.2769	93.4867	38.9504	40.2038	37.8132	71.7693	72.4375	72.2297	29.2656	36.7321	34.945	29.0113	32.3973	31.8142	20.4304	27.8721	27.448	14.7303	14.5622	14.5387	29.9616	28.1399	23.7005
ADAM11		0.103027	0.141729	0.030749	0.0515766	0.0952804	0.538785	0.912315	0.965569	0.566618	0.293808	0.478461	0.496531	0.217227	0.507423	0.0901746	0.0922826	0.366697	0.18873	0.187407	0.123534	0.119593	0.0874635	0.018068	0.0258776		0.0614235	0.290396	0.35208	0.416472				0.316633	0.328953	0.223763	1.24822	0.691182	0.203369	0.233949	0.0159133	0.0906329	0.0189367	0.0156506		0.0471826	0.209802	0.402827
ADAM15	21.703	46.9269	43.9189	17.8394	32.4947	32.8797	18.7204	22.7058	21.2285	45.5703	37.5107	33.2615	35.4835	30.0715	28.0002	20.7318	15.747	17.2733	32.9436	28.7231	16.1145	21.8546	17.4403	11.6365	69.1738	47.199	92.9838	27.7722	32.4653	36.2196	161.689	156.204	153.888	25.2364	24.9731	17.2371	11.5072	10.5395	3.52974	51.9905	33.1085	29.7308	15.8408	14.225	26.2552	75.6211	92.8428	74.7121
ADAM17	22.9691	20.0215	20.2745	22.9727	19.4671	20.3353	19.0945	18.7817	18.2774	16.9569	17.884	18.2531	18.3021	16.721	17.3492	6.815	6.79006	7.86471	28.3675	27.3351	26.7292	22.5708	22.9691	26.8038	14.7098	14.448	15.5459	9.96444	9.31437	9.48817	14.0879	14.0966	12.9349	10.1405	10.3922	10.6962	14.0684	12.0971	13.7713	8.4557	8.20593	8.86049	27.6733	23.5969	24.9142	9.02681	10.8872	11.0824
ADAM19				10.0302	10.1759	10.2198	0.138254	0.0968281	0.0829533	8.98702	10.271	7.09158	1.72797	2.1753	1.54824				0.67055	0.824773	0.860854	0.397977	0.325616	0.333771	6.11666	5.85884	7.25343	1.23282	1.09916	1.12507	0.986742	1.19806	0.850304	0.235889	0.137924	0.122097	7.43612	7.0035	6.20038	5.47538	5.85994	5.21762	5.6012	4.49187	4.81303	0.0708409	0.0902693	0.139614
ADAM1A	0.948242	0.675572	1.02816	0.860971	0.530391	0.346852	1.05796	0.779889	0.505012	0.496004	0.645695	0.551837	1.46962	1.16642	1.10758	1.70755	2.14336	1.14341	0.77965	1.5183	0.916425	0.292735	0.281847	0.386481	0.51786	0.724159	0.488122	0.905243	0.793469	1.10975	0.215171	0.539185	0.176462	1.39218	1.1295	1.37209	0.911706	0.836862	0.893258	1.26832	1.91722	1.50975	1.20214	0.845838	0.807414	1.07392	0.685546	0.352034
ADAM20	0.259939	0.221891	0.250877	0.0393383		0.0141728	0.176461	0.207555	0.109181	0.228646	0.364677	0.166153	0.246402	0.122552	0.261986	0.64991	0.427144	0.351497	0.137915	0.0292413		0.0135557		0.0494466	0.0656434		0.0822104	0.192106	0.15104	0.125621	0.0758116	0.112299	0.0837446	0.278653	0.39562	0.015399	0.122399	0.0806648	0.0433053	0.0457453		0.030853	0.398996	0.490577	0.218483	0.0421525	0.0478752
ADAM20P1	0.100333		0.212704	0.0582713		0.0647788	0.0308111	4.10958e-07	0.0998119	0.083558	0.19996	2.62336e-07	3.75587e-07	0.0980345	5.13143e-07	0.475205	0.632811	0.0654707	0.0756443				0.0741004	4.91176e-07		0.0302396	2.72792e-07	0.0752495	0.0502045	4.01889e-07	3.60178e-07	3.9413e-07	3.43383e-07	0.0121275	0.0339656	3.81132e-07	3.53782e-07	3.42201e-07	0.0344585	4.52902e-07	0.117168	0.0141028	0.0667078	4.04049e-07	0.133153	4.13816e-07	3.28494e-07
ADAM22	2.09383	1.51766	0.923133	0.636433	1.84341	0.526312	5.5672	5.62969	4.00027	2.22027	0.973773	1.02279	2.57087	0.658865	1.755	1.25777	1.67757	0.915827	0.949262	1.14278	0.880747	0.845944	0.542596	0.273073	0.0812812	0.514411	0.131875	1.47859	1.25978	1.37594				2.09865	1.91135	2.09461	0.440682	0.70507	1.09738	0.0797144	0.0444506	0.0643323	1.31846	1.20713	1.86589	1.03051	2.06529	1.02796
ADAM32	1.85966	1.06277	0.793986	6.51212	6.43061	5.29043	0.353422	0.0253771	1.17449	4.92584	2.09016	3.55755	3.10381	3.06601	2.38906	0.0877936	0.0703595	0.364156	1.6569	3.66216	0.526341	0.783923	0.995572	1.18799	0.946684	1.83536	0.952058	1.22642	1.81357	1.66934	0.00486206	0.0988896	0.22374	3.41639	3.10811	5.11341	2.00695	2.48773	3.92126	0.0670869	0.236705	0.0943133	0.621663	0.484952	0.0394792	0.774369	3.48788	1.37263
ADAM8		0.0251827	0.0475366		0.013814		0.0488459	0.124251	0.341728	0.588995	0.44509	0.212995	0.567091	0.974105	0.631791	0.529094	0.228696	0.106154		0.476979		0.0731818	0.225915	0.0355718			0.0263047	0.187156	0.231266	0.708624	0.606174	0.141494	0.665547	1.37047	0.644009	0.290343	0.105046	0.0120858		0.517148	0.237955	0.068994	1.405	0.807618	2.60921	0.155545	0.187009	0.081125
ADAM9	168.869	135.205	126.22	301.257	232.613	215.424	74.4379	66.6806	74.8889	62.6341	60.9168	72.2305	18.5417	19.0278	17.5463	20.3814	20.4236	23.0927	138.377	137.552	139.166	60.1931	60.4537	70.736	89.0717	92.3203	74.0792	102.557	98.3207	91.554	21.2319	23.0011	22.3018	12.8413	12.392	14.132	68.6947	81.289	83.5989	21.2607	22.078	24.3579	46.6951	44.2298	43.9615	77.2459	68.7365	58.7309
ADAMTS1	0.23954		0.067632	11.8468	12.6144	11.85	15.0133	16.4127	17.1179	0.774659	0.502694	0.422117	23.3871	33.9866	22.7698	0.153582	0.859371	0.257066	23.1908	35.5137	36.437			0.0160465	0.286736	0.116222	0.184829	4.92844	3.21978	3.13782	1.27707	1.26698	0.879085	0.0567859	0.00755324	0.146155	4.33883	9.35304	6.33844	0.259186	0.0293182		6.3777	6.47853	4.96747	0.232588	0.132441	0.130245
ADAMTS13			0.0870235		0.0178057	0.00667205	0.0775995	0.0285736	0.053606	0.069125	0.188304	0.037796	0.0350726	0.00444954	0.0338474	0.413731	0.132476	0.158506	0.267496	0.197872	0.219411	0.0709485	0.113551	0.0442659				0.191357	0.0193097	0.050808	0.0198953	0.0087047	0.098061	0.2246	0.0542065	0.284676	0.203337	0.086468	0.0612125	0.125539	0.0401302	0.0299039	0.091718	0.0180935	0.0608225	0.247547	0.171978	0.0483051
ADAMTS15	0.471281	0.665293	0.452215	1.46909	1.53288	1.71039	4.66298	5.53247	5.96406	4.17284	4.19168	3.4193	1.02577	0.87813	0.893649	1.5244	1.41139	1.59655				0.641264	0.589471	0.284273	0.362148	0.147142	0.34698	0.0386334	0.0128967	0.0811926	0.302921	0.513481	0.40679	0.118252	0.103312	0.0434361	2.62647	2.34537	1.15749				0.138708	0.0592634	0.068413	0.230873	0.382972	0.404375
ADAMTS17	0.445218	0.113724	0.103994	0.302642	0.0456685	0.112563	0.524963	0.384916	0.516357	1.13007	1.02344	0.730265	2.02184	2.0697	2.02804	0.843882	1.6227	1.8154	1.12493	0.720599	1.47383	0.589547	0.510727	0.239487	0.238279		1.07135	0.0904734	0.126601	0.381648	0.0374904		0.283769	1.11194	1.14358	1.12397	0.320021	0.194115	0.339115	3.53646	5.36116	2.603	0.0251797		0.0432508		0.0707908
ADAMTS6	1.52236	0.521801	0.943456	37.6639	33.9145	30.6027	0.228005	0.15557	0.246009	0.19109	0.512193	0.637969	0.127537	0.131975	0.55983				0.0718321	0.377396	0.144949	0.661064	0.599535	1.19572	0.367858	0.357571	0.16302	1.71681	2.72174	1.55522				0.180772	0.037684	0.0597647	6.74493	7.49144	7.28783	0.0394833			2.68693	3.39831	1.83045	0.0362713	0.0892081	0.0179218
ADAMTS9	0.802671	0.190744	0.459425			0.0105705	15.4131	14.5139	13.531	3.61206	2.92334	2.31733	4.89192	4.73207	4.06541				2.0525	2.11221	2.08499	3.17114	2.5955	2.69628	2.96571	2.52395	3.62293	0.151557	0.108032	0.301673	0.0330677		0.020831	0.439816	0.560993	0.70802	4.75512	4.49218	4.26817		0.101851	0.0502844	3.04337	3.13531	3.59272
ADAMTSL3	0.130849	0.0280013	0.0304477				4.07415	2.66795	2.55636	1.87178	1.27522	1.55921				0.558435	0.213777	0.875305	0.140847	0.0337134	0.00863122	0.122077	0.10155	0.779912		0.00481272		14.2412	7.85023	4.16547	0.238172	1.80788	0.414671	4.89355	4.04045	4.62208	1.33953	0.373588	2.17933	0.941756	0.131498	0.18108		0.0678072	0.00782763	0.995089	1.0128	3.15824
ADAMTSL4	1.44314	1.75069	1.43709	0.219283	0.192086	0.152613	0.274235	0.63492	1.01326	0.0729539	0.0720349	0.0629862	0.0147436	0.0146679	0.0501673		0.0449376		0.0221954			2.00986	1.13863	1.02803	0.194691	0.0265504	0.106715	0.35268	0.114813	0.232454	0.103415	0.0403168	0.0917396	0.132099	0.0848307		0.284864	0.154065	0.426658	2.29934	1.241	1.39363	0.0270469	0.0162123	0.191348	0.383138	0.687289	0.571762
ADAMTSL5	1.10495	0.785166	1.01316	0.0152448		0.0164476	0.110384	0.275544	0.43439	0.705487	1.02965	0.623087				0.344538	0.301499	0.152945	0.0809685	0.479309	0.223391	0.87018	0.501988	0.262611	0.0714418	0.0730444		0.127427	0.0318694	0.0364354	0.0293178	0.0488918	0.0593542	0.312575	0.191646	0.92106	0.710896	0.53157	0.978408	0.275213	0.0330776					0.826299	0.999169	0.706314
ADAP1	1.47302	3.71283	12.3578	0.470131	0.0832725	0.871006	2.61759	2.35007	0.373187	3.82905	0.811988	1.19816	6.56187	2.35517	4.7868	3.03566	1.40932	3.06187	1.18771	0.129531	0.222374	19.2786	10.3541	5.47113	1.21292	0.86593	5.42583	2.4552	1.30959	7.39305	5.07722	6.74495	3.9432	8.43585	7.2696	5.123	1.40422	2.15015	0.833696	4.84017	1.42162	0.70893	0.495556	1.13682	0.678838	10.7658	13.9322	12.0404
ADAP2	0.279764	0.624177	0.870695	0.312536	0.154802	0.22376	2.10771	3.48324	3.37048	0.603276		0.0121184	0.418934	0.0581051	0.0667495	0.486863	0.53941	1.54332	0.10062	0.134679		0.133017	0.409428	2.53845	1.2549	2.72615	1.52246	1.12542	1.66795	1.09431				0.164133	1.03205	0.102221	1.02709	0.60959	0.5333			0.178992	1.56883	0.357004	0.315965	2.96825	0.975104	0.634079
ADAR	86.4953	80.0361	80.3135	94.0755	79.5466	66.7291	68.265	60.6157	63.7308	72.877	64.9209	70.1234	145.727	144.16	135.658	39.3071	36.8801	43.8542	67.7548	78.7685	70.3276	53.567	53.2289	54.4491	143.263	132.357	124.883	79.8967	78.9643	73.3575	110.077	119.053	109.203	51.7556	48.8118	43.7869	39.9021	45.6073	42.6822	104.202	120.315	106.009	40.8776	38.3723	39.253	60.8663	50.8469	41.109
ADARB1	6.9079	4.97139	11.3727	1.02821	0.901119	1.31391	1.27715	1.84646	2.04563	17.9405	15.6299	14.8302	15.563	11.2425	9.36992	4.66171	2.21755	2.32986	8.90864	17.5545	12.4925	3.79823	4.54984	3.2959	3.33662	4.27979	6.83315	1.43386	1.90665	2.62495	0.165511	0.157767	0.39375	11.8684	9.50173	10.4417	6.36519	3.6093	3.50651	0.775334	1.44464	0.314129	2.70079	1.50876	2.73068	4.75092	5.62394	4.96292
ADAT1	110.183	85.3446	85.2248	22.4876	16.3759	21.0429	19.1864	17.0178	17.6751	21.9013	23.7483	29.3257	18.9271	19.3964	14.5271	14.7181	15.3501	14.3446	12.3961	16.7458	18.8923	59.4833	52.3519	52.8384	60.1383	53.7225	44.4864	28.8666	25.2946	21.4573	56.8233	58.752	63.6304	28.2629	31.8793	27.271	22.9286	27.5615	25.0197	11.9425	12.0977	11.3263	33.5107	31.4378	27.9442	43.7463	40.8167	37.617
ADAT2	1.17831	1.30492	1.43394	3.90958	1.84423	2.20942	2.07628	2.80726	2.89583	2.02413	2.05927	2.02277	0.929101	1.21507	0.875035	1.02955	0.681096	1.17676	1.25433	1.51151	1.17485	3.17425	2.0927	2.75045	2.6767	3.22209	1.75388	1.37194	3.27602	1.92639	0.786051	1.28113	0.542114	1.13035	1.03841	1.07982	1.86995	1.7029	1.02537	1.83847	2.34878	4.12738	1.85021	2.73943	1.91329	1.92419	2.47363	2.93858
ADC	0.663211	0.213795		0.686752	1.20629	2.00601	0.422	0.741215	0.547289	0.309481	0.275977	0.183315	1.98475	0.290701	1.32425	0.20344	0.234672	0.0247105	1.94704	1.72232	1.2574	0.755002	0.988747	0.308065			0.0853374	1.05285	1.33752	3.93812	0.181949	0.0992042	0.95881	1.50869	0.148114	1.57495	10.5606	5.79582	3.23516		0.408375	0.133062	0.961644	1.13952	0.357148	0.369991	0.465441	0.373361
ADCK1	1.25591	1.52256	1.37045	1.98675	2.75116	2.81993	4.0164	4.81867	4.88215	3.28898	2.47026	2.45041	2.98964	2.10156	2.39513	1.93877	1.4692	1.55891	1.71602	1.72231	0.862154	3.50052	3.64359	1.74564	1.80567	2.70413	1.74141	1.79124	2.86846	2.39118	4.3501	3.20973	2.87903	3.18084	3.19092	3.39064	1.98636	1.73858	2.78763	1.86193	1.48838	1.27345	1.01445	0.775532	0.984465	3.56597	3.39434	3.5103
ADCK2	16.6649	16.3441	15.2244	5.80326	6.87534	7.6402	6.94433	8.66226	7.53467	19.5075	14.3443	15.0863	8.90979	9.31092	7.08321	4.97602	4.40616	3.78903	7.58551	6.07916	7.23676	10.452	9.46365	6.49596	9.28532	4.82527	6.74935	7.99615	8.98614	9.92315	9.2194	8.39269	7.32901	7.81583	8.6046	4.94642	16.3419	14.1814	10.163	5.59567	6.32487	5.37624	2.71832	2.17714	4.1211	10.8452	12.6102	10.3683
ADCK3	3.34885	3.59558	3.89293	3.68644	4.38543	3.84715	7.48071	7.63866	7.62494	7.64143	7.48814	6.59042	12.4146	8.89141	9.94983	7.65124	6.70205	6.84702	14.1906	14.0899	10.6525	3.69463	3.1883	3.18744	5.55592	3.99455	5.80212	3.41281	5.233	4.69294	4.38315	4.78948	5.53333	7.78644	5.93488	4.51141	4.97725	3.96738	2.02612	8.4292	5.11309	4.53894	6.36885	4.37755	6.2601	6.23953	6.79483	5.24752
ADCK4	3.70447	5.3632	4.94072	1.99655	4.47815	3.65272	8.379	11.1779	11.8182	8.24209	5.85522	6.59676	4.34358	2.71978	2.67897	4.56245	2.95979	3.24697	2.55539	1.91654	1.26099	3.66585	2.71737	1.50309	2.68708	3.39143	2.72453	2.18396	1.9684	5.30514	7.78794	6.21484	9.64121	7.79455	5.03259	2.37977	1.79691	1.45634	1.77257	15.113	3.63713	4.4302	0.910564	0.672403	1.21373	3.34292	6.96181	5.37829
ADCK5	0.106132	0.455214	0.374174	0.0718095	0.70269	0.63865	0.475098	1.16938	0.915035	5.59665	2.5524	1.62177	1.86573	2.29605	1.3843	2.1534	1.75896	0.83118	0.984755	0.90673	0.193728	3.57046	1.64802	0.88773	0.175445	0.0307374	0.798835	0.107326	0.317939	0.422185	1.29233	1.01255	1.05169	3.08014	1.76885	1.27841	0.72324	0.338902	0.103094	0.80426	0.773525	0.434073	0.026278	0.202147	0.400385	0.28802	0.728885	1.16222
ADCY1				0.00809736	0.0542984	0.0752308	0.120631	0.183874	0.108556	0.0575943	0.276729	0.533013	5.47118	5.40075	4.92624	0.00898405	0.0153002	0.00608845	0.0143289	0.00910547		1.88478	1.23273	1.00741	0.0975123	0.159542	0.408974	0.170479	0.114076	0.609056		0.00581874	0.0245836	31.4215	30.7193	27.3236	10.5721	11.4502	7.64852		0.00295347		0.878395	0.919999	1.52428	0.223639	0.20295	0.0913664
ADCY10P1	0.0761868	0.0613531	0.670192	0.114487	0.117488	0.0597376	0.0957692	0.0261841	0.0562553	0.464695	0.306238	0.299192	0.052324	0.67645	0.0617557	1.21694	0.905073	0.215935	0.13927	0.472932	0.066277		0.0477515		0.285394	0.156142	0.0887531	0.0197491	0.0890392	0.0463556		0.0201964	0.0164686	0.0352497	0.0777957	0.0272558	0.0240172	0.0551878	0.0509988		0.0503427	0.0727713	0.0406126	0.0403706	0.0448368
ADCY3	17.6862	20.6357	19.9752	7.12339	10.0971	6.93736	16.6826	12.8555	12.7289	10.0244	10.6036	9.49832	3.195	2.84823	3.55754	4.56725	5.59926	2.7594	24.4307	21.1093	23.8262	16.3699	14.1401	10.4213	11.3693	10.5784	14.3728	6.29277	6.65827	5.22348	39.0093	38.9532	42.0024	7.38813	4.54487	3.72468	12.7284	15.6073	12.5169	14.9079	12.4689	8.74572	5.69995	5.99245	5.34441	3.30958	3.98518	5.65972
ADCY6	4.77019	6.25909	5.99051	3.30543	4.27166	3.41207	10.2723	11.9102	10.7797	1.95181	1.68242	1.54327	6.27428	6.46369	5.20962	7.36107	6.45817	6.27913	5.18726	6.9007	4.78387	6.92337	6.00258	4.84168	3.83204	2.9644	4.34774	6.91641	5.63803	7.68947	7.21352	6.40093	8.01988	4.73478	3.6167	4.3251	2.85513	2.66688	1.69406	19.5034	15.9184	12.5949	1.49759	1.49672	2.60573	12.1954	13.0709	11.3416
ADCY7	1.72404	3.17522	2.43592	0.103499	0.762608	0.284616	3.96996	4.80523	5.25208	8.22696	9.94875	4.77233	7.65768	4.06891	3.60774	0.67403	2.17517	0.387452	4.84013	4.61616	3.97053	6.68102	3.82763	4.03134	2.80493	2.97076	3.47094	6.30704	6.16668	7.72178	6.69429	7.65657	7.52374	0.462479	0.360311	0.150823	0.610851	0.30616	0.205836	1.63424	0.490238	0.380874	3.32716	2.74649	3.89756	0.237082	0.0830544	0.280893
ADCY9	1.57054	1.65266	1.50934	4.26944	3.38608	3.38172	5.68936	9.32908	5.19241	4.17378	3.95393	3.10239				3.35745	3.40573	4.37886	4.45312	4.0241	3.9335	3.46954	2.30995	2.59595	2.80285	1.21291	3.60549	5.34043	6.293	5.30708	8.85412	10.8701	8.20704	5.65522	5.58732	5.85847	15.4192	18.7656	12.9561	6.74584	7.44009	7.14388	1.5664	2.37552	1.71581	5.06121	5.07525	2.93844
ADD1	49.3169	43.1029	46.8293	32.9444	27.1262	27.993	49.5806	45.0045	44.8027	16.6715	17.046	17.1349	38.6992	38.5088	36.8141	33.3098	38.2797	33.2267	19.2552	21.9404	19.0766	14.4402	15.7384	13.31	38.7512	34.0489	35.038	39.3033	43.2031	36.8425	23.1846	23.4074	20.4487	27.3133	25.1091	21.8412	39.2998	43.4603	35.7191	16.0171	15.2252	12.7565	38.4982	26.4446	32.8154	24.611	19.8136	19.8595
ADD3	13.26	11.5665	7.74906	0.141319		0.0441229	58.6298	45.3029	53.3195	16.1095	15.6511	30.8154	9.32609	11.7369	8.9904	2.07658	3.74048	3.00835	36.7483	41.6037	37.0273	57.033	41.5525	41.3449	15.4833	15.5791	12.0808	21.8019	19.0976	17.2252	69.3918	60.6309	63.3663	3.41644	4.04454	5.51729	38.4647	29.0451	39.5133	7.5008	9.10667	15.1044	12.0001	14.5133	16.3555	9.50024	10.725	8.23014
ADH5	27.694	20.9672	24.1521	107.931	77.1407	82.0238	71.3089	71.4116	66.0029	41.9679	38.5281	41.0556	51.3932	53.1416	52.5041	17.6177	23.8583	25.524	62.0771	58.5262	63.931	64.3595	68.2489	59.6448	85.1909	76.6197	65.9103	64.515	59.4291	48.5502	23.9313	22.7429	18.0871	25.8844	29.6285	30.717	62.2478	76.309	83.3599	19.9261	22.2358	29.8934	40.2975	33.5157	35.4466	58.4982	64.4316	48.8803
ADH5P4	4.8677	3.28142	2.76524	13.7541	11.4257	10.8606	9.71292	9.38427	8.68467	6.3545	4.37756	6.07028	8.02235	8.38553	8.55189	3.45782	4.51832	3.87729	7.59528	7.4169	7.28612	7.87627	8.21154	9.21862	11.262	12.1265	10.8799	9.39424	8.02156	7.46264	3.60223	4.07963	3.48183	5.12566	5.26647	5.25757	10.6948	11.6766	11.4657	4.06565	3.28444	4.36269	5.12181	3.79668	4.72959	9.68644	9.49068	7.75563
ADHFE1	0.365708	0.240989	0.816624	1.00239	1.11512	0.505514	6.27311e-219	0.484706	1.56699e-18	0.338201	0.0511614	0.0969176	0.425142	0.525678	0.5512	1.53835	0.362534	1.31192	0.160653	0.122181		0.198353	0.0994215		0.196467	0.132665	3.91143e-13	0.600625	0.571139	0.80774	1.34412	0.466614	1.13312	2.37873	0.952767	2.43552	0.417816	1.21097	0.39732	0.0738013		0.26107	0.355797	0.333019	0.107189	1.63258	1.94279	1.81014
ADI1	115.314	121.073	115.233	27.7837	26.8609	28.2826	37.2874	40.4393	36.2119	56.2563	51.5554	57.8844	27.0213	31.8845	25.8774	29.2082	28.4154	36.3259	26.339	28.3355	23.4098	53.6798	52.338	45.7594	34.7436	29.8732	32.8072	24.0052	23.0542	20.5091	23.6965	23.1849	19.742	21.3516	24.5147	20.0826	44.2068	50.3571	44.7418	17.969	18.6177	19.2504	19.1465	15.7258	20.8062	27.9175	27.6936	25.5207
ADIPOR1	148.016	129.132	116.944	51.2284	45.1307	42.2492	25.9087	27.504	23.1937	57.1712	48.2634	50.8931	36.0671	38.8477	33.9774	50.4053	49.0457	55.6277	82.3195	83.6166	84.0113	111.488	107.414	94.7431	92.0246	83.6405	76.1624	56.2449	56.7856	44.0832	139.363	133.431	121.703	58.8992	62.4666	65.274	58.5999	75.3092	62.6813	49.1573	55.1175	50.8153	46.7809	38.4328	40.4329	79.9674	74.0024	64.9171
ADIPOR2	26.5287	23.0281	22.4661	22.2888	18.3909	16.7305	18.5997	16.3648	16.0409	15.7483	15.1381	17.168	20.0431	21.7712	20.34	18.9332	19.0901	22.075	23.5473	21.5626	22.1903	37.815	36.52	39.504	30.2926	31.7798	28.9781	28.8961	29.1738	24.5689	22.6113	21.7221	19.0387	17.0525	18.7759	19.6983	6.30472	7.00296	8.37699	21.1849	25.7803	22.515	17.6685	17.5837	16.5556	22.5475	20.5039	19.3767
ADIRF		0.306916	2.51409	0.783313	15.442	16.3043		0.17034	0.176072	80.2185	101.329	73.8602	0.352184	1.63947	0.595252	386.153	278.512	223.375			0.269613				0.30925	0.511414	1.49145	31.5685	43.9725	75.8194	44.5495	20.9488	23.2807	2.80828	4.11923	1.89914	0.234679			131.302	32.5843	46.5361	0.168177	0.0790523	0.987659	19.7844	27.2215	26.6689
ADIRF-AS1	0.41424	1.0956	0.395212	0.464209	0.301757	0.603097	0.553537	1.03426	0.530915	0.786033	0.586215	1.76249	0.0164912			1.17704	1.54029	1.54912	0.446153	0.786871	0.145891			0.0151334	0.014065	0.0327859		1.29249	2.66213	3.12067	0.511552	0.93687	0.538978	1.28208	1.1709	0.58238	1.51985	1.68948	0.730781	0.499027	0.763561	0.615479	0.338649	0.328471	0.659833	4.69719	4.40779	3.59653
ADK	154.639	123.114	106.138	79.8496	58.8618	61.5571	49.1549	42.68	37.5532	94.9652	88.0578	91.1363	66.7283	67.7017	64.0633	23.0123	25.3349	33.0418	48.511	48.4626	39.9705	87.8051	101.738	109.04	90.3054	93.1037	78.299	91.4532	88.5819	75.2339	91.5352	83.7733	79.7268	85.9066	74.6329	82.4904	49.7471	58.3563	58.9561	100.474	126.313	118.135	49.495	37.3486	39.4	164.09	155.406	159.857
ADM	9.8717	15.0767	15.247	2.89368	5.63317	5.2054	7.67523	11.2139	9.54342	12.7826	12.0063	8.0154	0.727722	0.644638	1.75471	0.179284	0.323293	0.341051	3.50482	4.20481	1.96503	11.6302	6.74339	7.75013	2.82781	2.24186	5.20522	5.2243	4.92717	5.56672	1.23198	0.87844	1.20376	0.891575	1.00192	0.383145	7.75574	5.58057	3.89572	4.69642	2.62394	2.01644	2.6949	3.19675	3.34599	1.4221	2.96312	2.97373
ADM2	0.0914993	0.0828729	0.243689	0.083157	0.283176	0.442241	1.97501	1.71637	3.18921	1.07493	1.2433	0.943833	0.68598	0.36109	0.411423	4.36574	2.82392	2.48199	0.685244	0.43753	0.143173	0.947911	0.507319	0.457735	0.07501	0.0479248	0.148189	0.532774	0.594631	1.27085	1.49773	2.02742	2.24152	0.0928679	0.0373379	0.235527	0.493055	0.204528	0.174481	1.42618	0.444196	0.393062	0.206946	0.116063	0.46385	0.438365	1.15408	0.995612
ADM5		0.113822		0.0229254		0.172029	0.498954	0.566834	0.486573	0.318044	0.0760629	0.155239	0.13372	0.0796225	0.181801	0.749485	0.534013	0.253732	0.275391	0.0507192	0.0833288	0.183109	1.80141e-28	0.0246157	0.130029	0.0345307	0.666459	0.106456	0.546624	0.870069	0.0218769		0.047511	0.548881	0.208234	0.106637	0.212759	2.20556e-27	1.99827e-26	0.35737	0.098964			0.0392063	0.126241	0.658048	0.285088	0.303711
ADNP	37.6194	30.8904	28.525	18.3717	14.0104	12.5965	42.2864	33.6971	37.4442	19.6548	21.0535	23.7184	32.3197	27.8412	28.9813	87.1561	91.3191	96.6922	51.0377	50.9826	60.3208	19.7902	21.2843	23.6439	31.6996	34.3087	28.0211	15.7546	14.1676	14.4097	29.1526	31.6529	32.3944	44.206	42.1943	48.1223	59.6529	58.2973	64.1299	61.6781	73.7288	65.7661	16.8445	17.3495	14.9794	19.7439	21.7282	17.0279
ADNP2	9.38851	6.93274	7.62822	13.9721	12.4997	11.8405	21.6462	19.36	20.9062	21.7877	21.4505	19.6277	17.1214	18.6315	17.4826	5.6816	5.05183	5.73965	7.27194	8.3468	7.80548	8.0351	7.32646	8.36294	13.4533	13.2713	9.09039	15.7028	15.752	14.2599	9.8357	8.91435	8.38541	9.02269	9.62975	9.50473	9.18492	9.38723	8.56115	6.81219	6.98551	7.36872	3.84724	3.25721	4.39962	14.5636	13.5183	10.6635
ADO	10.0688	7.81651	8.11379	11.5436	8.73305	9.00379	6.85137	5.77448	6.89287	8.06129	7.10175	8.09894	16.0827	17.6509	16.2888	3.95592	3.7996	4.43355	4.83152	4.78827	4.18852	4.1664	4.60158	5.12556	5.96086	6.19913	4.52497	6.18137	6.38918	5.20339	5.169	5.4993	5.10614	4.96555	4.85541	4.6515	4.3808	5.21334	6.10934	3.65131	4.22537	4.2511	5.81313	3.81123	4.39773	7.43257	8.77922	6.61439
ADORA1	0.999894	1.30748	1.12247	0.0463088	0.0295126	0.0260297	1.33251	2.24153	2.48392	1.26782	0.977309	0.639148	3.32147	4.38369	3.38031	0.0265666		0.0517891	0.252334	0.234243	0.800494	4.09095	2.47175	1.91969	3.01525	1.44557	3.92419	0.39167	0.397329	0.607567	1.96268	2.89344	1.88927	0.382934	0.448472	0.183333	0.412722	0.740607	0.111044	5.1399	2.3655	3.09438		0.152282	0.464729	0.350561	0.298377	0.256608
ADORA2A	0.137133	1.17723	0.806199	2.5774	7.7235	8.1924	0.181883	0.390584	0.610367	4.47618	2.45209	2.61011	1.74119	0.029428	1.80797	4.82155	4.08263	2.82859	0.116899	1.99202e-10	1.16274e-07	0.357048	0.00360616	0.0121047	3.83122e-14	0.962238	1.68241e-10	0.107629	1.26888	2.56783	1.73303	1.38685	1.59276	0.459891	0.482666	0.286776	1.56866	0.364953	4.07325e-25	12.2992	4.98683	4.55826	0.436995	0.230374	0.543388	2.85517e-19	0.541165	0.115532
ADORA2B	7.8275	8.26814	7.31344	21.2494	20.43	20.6859	0.689511	0.331091	0.240503	30.4567	23.7065	30.9573	0.608041	0.892073	0.898582	5.92078	5.19812	5.71229	7.1218	5.15872	5.21729	19.9858	20.644	15.636	20.2904	17.3399	15.8456	10.7241	11.1161	11.5643	5.10401	4.77256	6.2115	0.967727	0.526727	1.37046	32.315	31.7516	32.495	1.13832	1.92588	1.62683	1.22306	2.14465	1.78879	0.0481856	0.081836	0.300249
ADPGK	38.9027	30.2059	29.5163	24.6809	26.0681	19.496	24.1306	22.2293	19.2057	16.2278	16.9136	17.6037	19.44	19.2844	19.3552	9.63682	7.46516	8.33806	43.0924	44.4924	41.4686	22.3495	18.9032	20.3716	24.0672	19.4822	15.5722	16.8039	14.2568	16.7149	16.5485	12.7431	10.3618	21.7109	26.6477	28.2304	9.78678	12.721	15.1146	14.4533	13.6251	12.4727	28.636	26.5832	20.6918	21.1934	19.6747	14.6834
ADPRH	1.05732	0.975285	0.944655	0.0939653	0.229815	0.181953	0.0108182	0.155494		1.61122	1.22717	0.999416	0.731245	0.721429	0.815353	0.104085	0.167885	0.236985	0.396272	0.513326	1.02587	5.92952	6.04354	6.29028	0.993647	0.450917	0.546668	4.63488	4.18818	3.61612	0.413577	0.51506	0.296298	0.674912	0.239505	0.317476	0.108456	0.192111	0.103619				1.12007	0.761746	0.876565	0.325428	0.451892	0.62497
ADPRHL1	0.904627	1.45875	2.12437	0.0414188	0.433266	0.79408	2.48297	3.90115	3.61534	13.1154	10.3365	8.19294	2.04024	1.19183	1.65365	3.99889	4.57712	3.91526	0.475948	0.841385	0.0251478	5.19713	3.39393	2.67674	1.62424	2.11329	1.79253	0.145808	0.237386	0.0246149	2.29426	1.47606	2.03084	4.17465	5.01779	3.05388	5.80527	4.34019	3.1758	2.03774	0.686016	1.12922	0.724622	0.40635	1.77979	10.5643	14.1628	13.2504
ADPRHL2	5.29394	7.54525	5.47105	17.041	24.7573	22.7711	13.2489	17.3948	12.5649	13.2996	13.4814	11.3196	26.694	26.1839	23.5278	12.3594	10.4659	11.2683	11.8019	11.2896	6.61296	12.8494	8.47929	7.31688	12.5498	10.4149	12.6925	8.90198	6.97471	10.0761	17.7317	17.7748	18.7867	7.01519	6.17202	5.38123	11.652	14.5056	8.75114	8.33732	7.0447	4.26199	7.56684	4.60149	9.38358	13.4742	14.5652	14.304
ADPRM	2.31753	2.40143	1.95618	8.68234	4.90518	6.32532	2.11218	1.63083	2.79757	3.34688	3.39245	3.66797	3.14153	4.14028	3.76994	1.15773	0.721082	0.931369	1.22571	0.421613	1.90965	3.16636	3.79204	3.40711	3.46704	3.37228	1.7873	3.02422	1.92141	1.4747	1.23706	1.83358	2.1142	3.33754	4.3259	4.9994	5.93588	7.73775	8.95208	0.953812	1.82186	1.10436	3.47553	4.03769	2.20639	7.67768	7.48511	5.7803
ADRB1	0.126591	0.0127149	0.0128647	0.114954	0.239312	0.179519				0.267291	0.6111	0.560376		0.0298527	0.0170173	0.562848	0.645813	0.356759	1.11534	1.32482	1.32905	0.673518	0.579265	0.990923	0.166259	0.428624	0.520624		0.0267573		0.0246234	0.0273526	0.0272	0.323201	0.328379	0.300094	0.0264997	0.0392848	0.0281276	0.237701	0.0694	0.090186	0.0287962	0.0136572	0.07096		0.0559818
ADRBK1	6.79315	15.5403	13.7022	8.22146	11.3608	12.1448	12.8554	15.4459	12.0391	20.731	19.7909	18.5564	15.9269	22.2234	13.8411	40.0418	41.127	47.0756	25.705	24.9326	18.6175	34.844	23.8458	14.7638	16.3713	11.9095	22.0381	19.3029	22.044	23.8791	47.3369	46.6515	41.1829	17.879	16.8774	17.4978	10.1692	13.6526	5.92059	19.5275	17.0778	15.2856	9.0799	5.80578	16.4192	13.4272	14.9931	10.5227
ADRBK2	0.00822152		0.00379049	0.698497	0.492291	0.0896171	4.53129	5.06769	2.55488	2.92997	3.04768	2.42997	6.2478	6.36628	4.25512	0.628694	0.94749	0.294914	23.0685	24.5139	22.4068	3.62661	2.08597	3.97634	0.951452	1.06015	0.332809	4.78844	6.71755	5.26253	0.0181844	0.0161103	0.0160696	1.70812	1.71264	3.17215	8.85184	6.10378	8.96894	0.0218763	0.00408853		4.82886	4.51824	4.4698	1.06319	1.13301	2.17187
ADRM1	18.5194	35.7074	46.4828	12.159	32.4498	40.2164	16.1877	29.4608	25.8894	38.391	26.1489	19.1503	26.9268	19.2131	18.2465	157.506	91.0784	82.5837	24.501	25.3967	14.824	28.9834	18.3411	13.5507	18.2602	13.2772	25.5324	12.7846	12.8283	29.5453	18.4525	15.9649	23.8102	52.5306	44.4531	25.9268	65.2955	33.4553	21.9268	56.0501	22.9334	20.9894	13.1446	8.75259	21.5628	18.3791	28.8781	32.4652
ADSL	63.4948	52.5933	48.4067	61.7512	55.8809	54.7988	82.3256	91.6323	79.7414	82.9236	70.3958	82.4331	29.9699	33.5519	26.8987	11.1148	12.136	11.368	51.052	50.4868	43.2203	65.72	59.9504	56.4307	50.1257	43.0357	40.2588	34.1282	33.3946	28.3008	33.0925	29.8057	24.0365	14.0685	18.1603	16.4291	64.0081	84.6276	75.362	10.3824	15.3613	13.6756	34.3288	25.0492	25.1026	86.8906	77.2515	67.5644
ADSS	39.3447	31.738	30.4539	12.7045	9.26191	9.87999	29.8133	27.0507	26.8831	30.8689	28.6541	31.1314	16.2524	15.5946	16.7178	17.5006	16.1599	16.1089	33.9217	30.6044	28.0268	29.0115	26.897	30.8057	44.7305	46.5786	39.3992	34.6175	35.266	28.8769	29.218	33.3305	26.8992	11.2153	10.8603	10.5725	34.3049	38.9761	37.1113	14.21	17.4814	16.1222	21.5672	20.5516	21.5602	18.3125	18.0189	15.8088
ADSSL1	1.21954	0.753621	0.658021	0.980719	0.65479	1.5673	0.928187	1.21464	0.254129	6.9652	5.59763	5.41574	14.754	12.1538	11.1928	0.700578	0.44633	0.366271	1.27106	0.358027	0.498464	3.27608	2.59561	3.85827	0.52096	0.365923	0.623978	2.80864	3.00254	2.82169	3.03226	3.68267	3.35148	2.39266	2.36489	1.87516	2.04416	4.333	1.73051	0.588036	2.06717	0.968689	0.131766		0.0244327	1.73234	2.35347	0.558852
AEBP2	9.9517	9.27151	7.50947	11.7687	11.2259	7.33153	20.503	18.3212	21.06	11.4639	9.18734	11.8259	14.5179	18.3762	15.3624	12.9512	16.3583	16.1113	21.1488	18.5223	23.1169	26.7569	29.9187	26.3211	8.04996	6.01094	3.81762	14.3421	13.7413	11.6458	10.2517	10.4142	10.0483	8.25057	9.24789	11.2564	7.95637	5.8914	6.17839	8.69599	8.67565	9.04841	14.148	11.3208	12.5554	12.5632	12.7726	10.3705
AEN	11.8063	15.1012	14.3989	4.34341	6.66567	8.29314	18.0657	22.691	21.5035	10.6719	10.1524	7.88648	5.66192	5.42717	4.58792	3.6234	2.98325	2.88921	20.752	19.0543	13.1006	2.41687	1.52617	1.59172	6.61637	6.93131	7.89033	3.82354	3.74807	5.20889	4.1752	3.84276	3.68918	25.3204	22.9143	17.3956	10.3406	7.60057	6.48839	7.17033	4.04803	4.37995	4.53498	3.18839	5.71621	5.38049	6.48019	6.20952
AES	15.9882	30.4481	32.8301	24.1416	46.8198	47.9998	16.7753	25.1805	22.9329	52.1596	45.8526	38.2511	44.7948	39.7462	34.7575	93.2567	68.5683	59.3348	45.8918	39.3838	26.8716	51.8575	38.6574	28.0697	16.1395	16.6357	23.6318	36.2531	40.8054	61.0787	74.7722	70.4573	76.5061	23.6547	25.2626	18.3385	33.7504	24.5952	15.2423	73.7895	34.074	32.5488	13.3179	9.5409	26.3723	28.6229	36.8849	43.4375
AF001548.5	0.131538	0.174822	0.346353	0.177639			0.120541	0.0651138	0.0676423	0.338719	0.0641051	0.0557278	0.943672	0.199013	0.380453	4.10638	4.85658	3.17042	0.0597875		0.69203	0.119789			0.528185	0.334019	0.0600596	0.599157	0.477204	1.4242	2.89133	1.41499	3.9774	0.348588	0.126578	0.531638	0.29892	0.122038	0.253224	0.935423	0.561284	0.200628				0.24468	0.328677	0.0756095
AF127936.7	3.16173	2.94906	2.89456	0.14234	0.0697364	0.268664	1.8612	1.55451	2.17749	1.02426	0.840714	1.19222	0.772619	1.30676	0.747896	3.45222	2.52372	3.55712	0.918412	0.811985	0.859081	4.92148	5.51536	5.57035	3.92501	3.80594	3.46719	1.97821	1.54699	1.20836	0.719504	1.12868	1.04481	1.61108	0.877583	1.50269	1.33049	1.99595	2.60078	1.20438	1.36941	1.44069	1.72543	1.89617	1.27664	1.82773	1.50864	0.918062
AF129075.5	0.213583	0.125899	0.933354	0.44828	0.363811	0.398226	0.19521	0.421323	0.218563	0.58516	0.276547		0.581329	1.21445	0.655928	0.0681017	0.137658	0.273131	0.193175	0.411415	1.48987	0.387788	0.0637498	0.542372	0.951067	1.50216	1.29514	1.48526	0.899608	0.511102	0.0587308			0.626347	0.204413	0.28616	0.515829	0.528226	0.477824	0.144078	0.134467	0.576208	2.77879	1.89752	0.680955	0.263635	0.53044	0.162764
AFAP1	7.19277	9.82938	10.4286	15.4112	23.3114	17.6159	2.89562	2.75532	3.32303	13.2574	13.0479	11.567	12.3909	11.4399	10.1991	5.9617	4.21019	6.05338	9.71742	8.83484	8.25753	21.2077	15.6845	14.4008	13.8591	12.0091	15.3942	11.936	12.0432	13.4711	5.36357	4.40112	4.57771	4.24393	4.21836	3.66867	18.291	14.9825	9.97801	5.90264	3.90631	3.9124	9.86944	7.1307	12.5335	0.370817	0.435278	0.524854
AFAP1L1	1.06813	1.4872	1.17262	1.20626	1.75339	1.76811	0.485315	1.13942	0.731097	11.0793	8.61101	8.35972	1.40113	1.06063	0.860032	0.0177735	0.133137	0.0374029	0.848172	0.487768	0.368767	13.6603	9.56035	10.1225	0.195127	0.160411	0.305656	0.531463	0.584944	0.472453	0.47017	0.672582	0.834414				5.95466	4.01503	3.80353	0.178014		0.118228	6.81118	6.17191	8.19827	0.0239164	0.0466594
AFAP1L2	0.0106018		0.0486122	1.10318	1.39478	1.39887	16.9633	19.1808	18.5842	3.47848	3.28862	2.15065	20.0281	16.1223	17.16	0.145829		0.0107912		0.013873	0.015228	2.72121	2.4736	1.93868	0.789221	0.284445	0.855374	0.599204	1.31849	0.967985	6.12136	6.70917	7.04764	5.81982	5.15782	3.74448	5.68403	5.11414	2.68975	0.423088	0.0104905	0.0439162	1.17297	0.691926	1.56489
AFF1	13.4417	9.36435	8.11897	7.67631	4.3551	7.45546	13.9162	13.2708	13.5602	5.15159	3.13304	1.84625	3.3837	2.75718	2.45947	23.7336	24.1749	26.4732	10.3319	12.2917	8.94429	9.02673	9.34062	23.1548	17.8731	8.58306	8.49144	9.58869	6.76923	6.7164	12.4379	11.0161	11.3264	4.80842	5.46651	6.3854	3.6726	5.16077	2.33152	9.76153	8.77987	10.92	5.7859	6.06589	7.21089	4.28067	3.77643	1.58958
AFF4	27.5097	22.36	21.7103	38.2629	31.4785	31.1499	25.4738	24.0921	24.1803	8.22235	8.18419	8.81686	22.2062	24.1795	23.9093	27.5277	32.8612	34.4165	23.3761	24.3644	28.3602	23.9689	31.2852	28.0494	32.8308	32.5995	26.9167	29.6669	28.185	25.5713	18.2113	19.0937	18.2798	20.9461	19.5332	22.2211	24.3182	22.2058	25.9326	11.4837	16.7601	15.9108	19.1276	16.8891	15.4863	15.7655	16.9696	14.4934
AFG3L1P	5.08908	5.97831	6.19378	3.51623	3.39673	2.46711	3.1744	3.14042	2.34133	6.3037	7.82641	7.0089	4.34286	2.89014	4.1494	3.80143	2.82745	5.49347	2.9792	4.8497	1.82283	7.78819	6.87507	3.54625	7.6922	6.56243	7.64707	4.37356	4.07697	6.0176	2.4196	4.01728	4.98819	6.89908	6.62428	8.04121	2.13202	2.2813	1.9313	3.2583	2.98294	2.85488	10.8613	11.986	12.5343	5.73881	5.78758	5.37575
AFG3L2	58.7537	54.7777	47.8042	49.3225	44.186	37.8312	48.3132	46.0612	47.6742	29.9913	34.8983	36.2906	68.7732	72.4815	69.6728	24.9816	25.3739	25.3845	39.7597	39.5034	37.9186	57.6937	58.8681	52.4873	60.4614	58.1324	55.1242	69.6209	70.8359	64.2779	24.5819	26.383	26.4647	16.6967	20.1839	17.3969	70.6774	68.4719	58.1862	37.6902	47.6167	43.5768	53.7952	43.3073	49.3453	33.3783	32.3504	28.9477
AFMID	13.4752	16.4324	14.8948	5.90767	4.8038	7.5588	13.3436	17.459	17.6447	18.47	16.3816	16.2721	9.44081	7.26741	7.9209	6.30004	7.4854	9.48855	12.5604	11.7461	15.8144	15.6962	16.8999	16.9872	13.8804	10.3721	8.90183	19.0982	22.7948	17.6378	9.93951	8.81322	9.12653	13.8393	13.2984	13.2188	13.4492	20.4278	17.6165	32.0868	29.6652	26.594	6.60722	1.33955	5.20805	20.3648	18.8204	12.4095
AFTPH	33.3816	24.8401	24.3189	7.37502	5.1835	4.87389	14.2064	12.6943	13.2943	24.0727	24.7831	29.4342	12.148	12.744	13.2792	17.6826	16.9752	20.6661	12.5906	14.7728	12.2428	19.0492	21.8634	22.9349	27.9677	24.3059	20.6428	20.3406	19.514	16.631	25.7399	26.6868	22.8509	14.9723	14.1877	15.6012	11.2305	13.118	14.0198	12.0312	16.0008	16.4652	15.6077	12.4349	13.371	18.6628	15.8776	15.1109
AGA	10.0944	8.744	9.44489	4.11486	3.90078	4.01296	8.5457	6.00317	10.2969	7.30224	7.73071	5.27865	6.18498	6.71699	7.09964	10.6834	12.0747	12.6334	11.4556	12.5418	11.352	16.644	21.1607	17.1355	7.33171	6.33298	6.29626	21.6714	20.6311	20.1784	13.9268	12.2953	13.8981	8.66764	9.26417	10.4043	3.6945	6.53179	4.76457	2.60563	2.84569	2.38308	12.7954	10.2346	14.5014	14.9949	19.7068	16.0493
AGAP1	12.5997	19.7189	16.9113	3.3933	6.10779	5.54518	5.64754	5.73106	5.78845	15.7242	14.4897	10.0287	11.1474	11.8014	6.2091	9.79327	7.74927	10.0711	10.1904	5.2495	4.83947			0.0376345	8.81504	5.60428	10.2571	11.3987	11.2264	11.128	11.617	12.1556	11.7052	9.70801	9.88171	7.58275	18.6568	16.493	7.6829	8.46643	6.50839	7.35958	8.36381	5.27412	8.14781	5.07096	5.62235	4.83772
AGAP10	0.23948	0.3498	0.451143	0.221988	0.320992	0.149219	0.429273	0.576377	0.437052	0.961604	1.1977	0.7924	0.728467	0.731338	0.635773	0.592017	0.6277	0.542378	0.328686	0.290519	0.188553	0.313105	0.236637	0.277042	0.159128	0.117001	0.104059	1.32981	1.59537	1.76296	0.362787	0.231474	0.293772	0.62163	0.281162	0.678469	0.253855	0.162661	0.147616	0.56236	0.639599	0.374501	0.824309	0.654518	0.780101	0.860015	0.799554	0.757157
AGAP2	0.545191	2.40152	3.35047	0.516616	0.997382	0.821577	1.16609	2.24654	1.50566	0.600879	0.372044	0.368102	0.788008	0.231739	0.380621	0.169316	0.213469	0.505258				0.0747173	0.292791	0.0680997	0.194082	0.0259776	0.13226	0.197324	0.0663257	0.173465	0.0610685		0.0674585	0.998249	0.71174	0.446575	0.101337	0.0739243	0.105174	0.290238	1.28814	2.03733				1.3039	1.34868	1.73739
AGAP2-AS1	0.208816	0.214407	0.431015	1.48598	5.33309	7.04279	0.584329	0.757232	0.730067	7.53259	5.36541	4.1947	2.57727	1.96317	1.45938	0.618872	0.569598	0.387268				0.277461	0.413648	0.260719	0.916902	0.746692	1.87443	1.23131	1.76139	2.96814	2.43946	1.60498	3.57408	3.30424	3.75253	1.56453	2.19565	1.27618	0.884355	0.653757	0.145383	0.188344	0.602565	0.228161	0.919142	0.114516	0.990499	0.677197
AGAP3	4.23859	9.2603	12.1352	4.76432	9.64988	8.9249	12.6371	16.5185	10.7555	11.4791	8.98006	7.89982	10.1955	14.0156	10.7793	7.11313	4.65522	4.7487	19.338	20.1646	9.02878	7.93017	7.0981	1.34985	7.79446	4.72403	6.64931	2.67115	2.07714	3.03856	13.0313	15.0623	15.7322	11.2831	9.23586	8.00945	8.16609	4.99432	4.39714	7.21849	3.5784	2.36903	2.44874	4.59162	4.40655	7.85913	7.40112	8.72449
AGAP4	0.333956	0.673625	0.439252	0.221176	0.129738	0.359691	0.273252	0.957285	0.436837	0.77054	0.266172	0.475361	0.355427	0.501385	0.88774	0.410616	0.59861	0.289199	0.408081	0.264201	0.424277	0.570825	0.742715	0.5109	0.326911	0.136086	0.228152	0.319048	0.298982	0.561565	0.209967	0.154884	0.150816	0.176142	0.526925	0.198022	0.375161	0.209703	0.14401	1.01815	0.355081	0.82331	0.432737	0.13538	0.303274	0.470042	0.50224	0.50922
AGAP5	0.377503	0.29231	0.180706	0.329384	0.249809	0.127407	0.351593	0.860969	0.144104	1.01894	0.783512	1.51724	0.456763	1.37969	0.919618	0.871122	2.21179	0.788988	0.0848363	0.000101569	3.30069e-06	0.465167	0.15129	0.402204	0.395443	0.043516	0.398538	0.652833	0.601655	1.31813	0.51009	0.309941	0.306544	0.503778	0.628698	0.307772	0.712961	1.02587	0.399029	1.2448	1.6722	0.976057	0.19724	0.588481	0.108207	0.575532	0.213623	0.53947
AGAP6	0.254231	0.358291	0.434132	0.275516	0.47467	0.248653	0.476103	0.655785	0.485133	0.6606	0.601155	0.60372	0.57855	0.443097	0.382534	0.491712	0.70215	0.63049	0.348234	0.300183	0.221228	0.244116	0.185312	0.218448	0.124811	0.0742115	0.0698785	0.635375	0.668015	1.38321	0.203531	0.232071	0.218913	0.389027	0.323593	0.342639	0.404978	0.16958	0.210758	0.73359	0.664865	0.482544	0.383503	0.454811	0.463131	0.916555	0.524825	0.463706
AGAP7	0.0078456	0.0107307	0.00826195	0.0183627	0.0867025	0.078612	0.0436262	0.0293063	0.0321623	0.059924	0.0397389	0.060679	0.140326	0.0855195	0.0770225	0.112961	0.0975955	0.064723	0.04232	0.0220082	0.013169	0.171455	0.0952615	0.0345596	0.0252597	0.0295155	0.0437881	0.0488487	0.0182735	0.063934	0.0342953	0.0147551	0.0384663	0.177243	0.170854	0.143638	0.0557935	0.0393185	0.0141622	0.069664	0.0396384	0.0447601	0.0521605	0.0313674	0.0454912	0.065593	0.0479033	0.067697
AGAP8	0.556536	0.537498	0.346641	0.829208	0.506594	0.863016	0.861142	0.728713	0.708948	1.04642	0.506385	0.90987	0.890736	1.20411	0.597775	0.908577	0.85558	1.1744	0.314998	0.131023	0.624486	0.775672	0.568501	0.95988	0.178476	0.14844	0.411856	1.03812	0.711067	0.895829	0.184084	0.373273	0.256965	1.27414	2.07223	0.763395	0.351165	0.315	0.324706	0.55863	0.639991	0.925085	0.767783	1.09625	0.659151	0.736926	0.76191	1.35073
AGAP9	0.100683	0.117464	0.17189	0.115116	0.166235	0.0721825	0.18724	0.249803	0.195352	0.452774	0.688755	0.428364	0.367782	0.308723	0.249711	0.386896	0.335075	0.29426	0.158414	0.188497	0.193582	0.216203	0.114155	0.144467	0.059328	0.0301853	0.0642765	0.665565	0.715045	0.962595	0.125555	0.158119	0.177863	0.229852	0.1496	0.292079	0.0481701	0.0391242	0.0103142	0.354208	0.454538	0.236664	0.527195	0.324716	0.284521	0.412502	0.380797	0.373322
AGBL2	0.0310854	0.754279	0.66836	0.396576	1.50091	0.931845		0.0562504		0.73636	0.602008	0.207095	1.69452	0.0988182	0.298835	0.213127	0.143762	0.533588	1.91538	0.726759		2.20506	1.55945	2.4772				1.73433	1.15747	0.926231	0.220209	0.1214	0.618748	1.11671	1.79206	1.48432	0.377846	0.406586	0.354397	0.0327968	0.323441		1.27158	0.955896	0.620227	1.93077	1.48915	0.669005
AGBL3	0.409863	1.31708	0.669653	1.48776	1.06617	0.988122	1.74943	2.7945	1.88219	0.976781	0.820335	1.67486	0.218461	0.0285739	0.876056	0.542044	0.158405	1.29519			0.0149668	0.757682	0.0697641	1.06898	0.703029	0.564293	1.05143	0.437323	1.16768	2.17012	0.550103	0.323393	0.294276	0.498608	0.71513	0.746324	0.592186	0.0650215	0.291246	0.064586			0.371812	0.657863	0.195034	0.444265	0.615687	0.0163689
AGBL5	18.7685	21.5265	17.0751	6.99634	7.84548	6.20614	24.9963	29.2727	25.1603	21.0414	17.3515	18.8446	4.38299	4.66336	3.96379	13.0409	13.9084	12.4896	36.4258	37.4768	31.0153	30.6635	26.5533	22.374	8.16258	7.39277	7.34075	11.9075	13.3894	10.1448	19.395	21.5773	18.2279	8.25561	8.9318	8.43566	19.1926	23.3288	19.1174	4.06635	4.25657	3.75648	5.08096	5.32987	5.90273	17.2176	13.7876	15.0766
AGFG1	118.174	103.922	100.527	109.423	85.6102	86.6089	46.7384	39.9779	36.9664	69.2013	64.6052	69.0754	59.0355	51.199	53.8953	24.1882	24.9504	26.0034	34.12	30.5962	34.5635	58.1059	60.2421	64.1937	86.2909	83.8639	76.1154	85.3293	80.2862	67.5433	61.7178	64.8353	57.0335	25.8378	24.5414	31.7656	48.4973	53.5612	48.5999	29.9343	38.0472	36.2518	31.7236	26.619	29.2879	24.5493	19.8602	19.3122
AGFG2	3.25229	4.68617	3.47646	2.30726	4.57647	3.88111	2.0132	1.15794	1.82649	3.11841	1.99095	2.07166	3.42599	3.29664	3.98062	4.49649	3.09298	4.13403	3.40071	3.1763	1.98177	15.0491	10.4598	8.19487	7.66887	4.84026	8.66941	1.65889	2.26292	2.71364	10.5563	7.89804	11.2069	2.18213	1.32198	1.93993	4.47555	2.99163	1.61655	5.78626	4.07716	3.38719	0.726231	0.515024	1.23779	0.913865	1.50487	2.01491
AGGF1	12.054	9.64364	10.1916	16.2341	11.5061	13.8876	13.2857	12.7845	14.5681	5.50477	6.29634	5.6495	8.77839	10.2745	9.4215	7.08835	7.53504	7.8707	11.388	10.0096	9.69055	8.56878	8.41074	9.28499	8.29986	8.92583	6.82907	7.58797	7.22134	6.50699	6.08627	6.88445	5.90502	9.28018	8.59866	10.0144	9.17109	10.3359	12.4335	5.32475	7.38269	6.96143	5.25419	5.48848	5.21621	16.9292	16.6312	16.2239
AGK	17.6874	12.8778	11.4217	16.7268	13.2439	13.3063	10.8874	9.67985	9.4189	13.1922	11.043	11.4139	7.16785	7.18535	6.5305	4.7501	4.41462	4.84065	15.6238	15.067	19.7653	5.2956	5.3017	5.56455	13.1923	13.4382	10.7594	5.7663	5.5798	5.69275	9.86145	9.7409	8.15955	4.72084	5.32825	5.11055	11.0586	13.327	13.0465	8.79765	11.9334	9.89665	4.69071	4.05024	4.12259	8.57165	6.8061	6.92335
AGL	13.2333	10.3434	8.73318	4.72616	2.88885	3.19688	10.8802	9.18547	9.55881	9.24739	9.87556	11.6414	3.57313	3.63299	4.15582	9.70428	12.5595	11.4661	17.0239	15.0175	16.738	19.5355	21.1971	22.9592	9.22935	8.77887	7.78591	29.9545	29.5085	24.8439	22.9053	23.0126	22.6625	3.99897	3.954	4.0759	5.7922	6.21571	6.85739	7.86686	9.46289	10.2541	4.48078	3.27668	4.15479	8.86995	10.2229	7.61626
AGO1	10.571	11.2297	10.1851	5.40633	5.51229	4.5391	10.0321	10.4216	9.43355	9.42685	8.85856	9.06573	22.3351	21.4897	20.5315	7.26342	7.38419	7.05428	12.2337	13.8286	11.2467	9.61055	8.2703	7.76772	8.84541	8.41325	8.08873	10.1896	10.2119	9.02072	15.8226	17.2556	15.7464	4.10072	3.69294	4.11416	9.55903	10.128	10.0646	10.9557	10.5495	9.2453	6.81521	5.08034	6.36985	3.59228	3.62558	3.26221
AGO2	24.9924	29.9908	33.8873	20.211	21.2861	15.6179	21.494	14.5412	14.8024	33.5923	46.1818	26.7396	26.5733	17.2363	18.8114	67.8185	60.2563	68.4857	35.6351	34.2211	20.3365	34.4518	37.7157	26.9405	13.3456	13.3185	18.3617	6.13755	9.65888	5.75436	15.5889	21.2685	23.7891	19.4015	20.1649	22.0583	17.3633	14.5818	13.4249	11.3264	7.76977	7.63137	11.5292	14.3894	13.8288	10.2034	14.1577	9.05211
AGO3	16.8667	9.94384	11.8761	11.3519	12.8531	7.54032	6.7546	9.41562	7.14288	14.1872	12.2271	12.5934	24.6854	26.1513	19.6238	4.16068	3.40075	6.46464	18.4431	20.3446	19.3129	16.1227	12.3108	13.7182	12.3807	9.71299	9.21068	11.267	11.909	8.59134	15.5369	14.2003	9.083	7.78739	6.18874	6.62286	12.7738	14.7168	19.2982	5.0225	5.48816	2.93381	14.4269	8.90794	9.08619	7.38493	6.72084	5.56686
AGO4	1.5979	1.13132	1.02165	2.85737	2.13889	1.88039	2.45346	2.80324	2.86376	1.92581	1.49158	1.72791	9.73079	8.04479	9.12755	4.07119	5.88805	2.69421	5.72233	4.96207	7.31569	1.95834	2.30568	2.31512	3.64551	2.35847	2.48937	3.59889	4.9959	3.98292	4.77806	5.89844	4.99329	2.84625	3.73413	4.01566	3.00283	3.33618	4.07541	4.16183	3.63527	3.38228	2.65991	2.37001	2.28134	2.18899	1.26284	0.833905
AGPAT2	2.18364	3.59613	5.4298	1.35904	4.5887	6.37256	2.00915	4.91088	3.658	9.24236	6.19715	4.47401	13.809	7.04113	8.02041	9.90986	5.01828	3.9752	4.89723	4.39849	1.14255	10.0926	6.82603	3.65976	1.6068	1.67611	4.02727	1.91323	2.06763	5.65844	5.68247	4.99145	10.5718	12.0737	8.81105	5.55281	9.34862	2.81189	0.519609	12.3741	4.85511	6.1012	2.28973	0.724884	3.24197	1.9041	3.16672	4.75322
AGPAT3	11.7407	12.8531	12.8768	9.62682	14.0847	14.5408	8.43925	17.3476	14.0233	26.7826	23.4859	17.4011	39.7226	27.1949	28.3417	28.4782	16.6675	16.8035	3.46188	3.84529	2.78384	11.5295	8.78363	9.83399	11.0614	9.37231	15.56	7.98405	11.1437	12.5681	17.3597	14.7377	13.9673	14.9386	16.023	12.9472	19.2863	12.3525	11.8829	15.0884	8.15872	9.62159	10.0187	8.10193	11.3246	12.3279	15.8039	13.1204
AGPAT4	0.00976821		0.097636	9.21928	9.42946	7.29936	6.99865	7.0219	5.13167	3.24795	3.78288	2.10157	3.31923	4.40628	2.34886		0.0599142		2.84913	2.99675	1.85594	0.872553	0.921001	0.527986	1.17033	0.887776	1.42585	3.77871	3.85259	4.56244	0.0351395	0.387694	0.276049	0.0135658	0.368233	0.124675	6.23213	5.1484	4.13334	3.27484	2.39435	2.52329	2.53866	2.52511	3.60151	1.03793	0.758003	0.538837
AGPAT5	14.2452	11.1894	11.6592	63.3115	50.5182	50.1862	29.7583	26.4752	23.8461	16.1351	17.2325	16.4604	19.446	26.583	18.8274	6.96754	8.24985	7.67296	15.5608	15.5843	15.6921	21.8247	20.6134	25.1318	18.1765	16.6972	14.8816	59.7583	58.2552	52.1328	4.67924	5.00638	4.75699	8.55951	8.26875	8.51541	13.2615	14.8532	17.9778	9.72923	7.68526	9.35028	17.8763	15.6373	16.5067	17.0274	16.797	12.9402
AGPAT6	29.8831	22.0751	20.9306	86.8721	64.7359	50.6115	34.7996	33.4837	28.6731	19.7454	21.8693	18.942	23.9753	21.2857	18.4145	23.9066	24.0558	26.2091	66.0205	83.7973	86.4809	33.6446	34.5191	40.1592	64.6382	53.6316	47.5605	52.6966	51.4679	49.414	7.46384	6.78863	5.97295	13.8471	14.8044	12.7225	45.4476	64.2078	55.391	16.1616	21.1685	19.4858	58.87	57.2898	52.5167	26.4809	32.7158	20.763
AGPAT9	9.75496	7.90707	6.70761	1.09685	0.954338	1.01616	4.84592	5.47671	5.68249	26.1936	23.9394	25.4948		0.0930803	0.232946	1.17216	1.08387	0.721816	11.2359	10.0011	9.97165	14.6039	13.0772	13.1911	13.1901	13.1121	11.6602	9.83815	9.03469	7.87384	0.663361	0.451292	0.852356	1.18589	1.3344	1.75315	2.01159	1.6438	2.66105	1.07857	1.41992	1.09092	5.22699	4.13021	4.39062	0.662465	0.553878	0.281956
AGPS	36.4143	28.1515	28.7174	5.59151	4.10351	4.32912	16.5186	15.7436	16.0113	31.3378	31.163	36.681	5.20422	4.17922	5.3945	5.02154	4.87003	4.95117	7.52765	8.65353	8.51765	22.8143	22.908	25.7206	6.59293	6.60824	6.32411	18.807	17.2452	16.2359	10.4201	12.0691	10.0964	0.00897422	0.00496824		22.2755	25.235	26.4263	0.345427	0.368553	0.600619	13.699	9.19761	10.362			0.00595351
AGR2			0.453431				692.076	669.375	591.539	2.54744	1.36833	2.30172	0.959392	0.514942	1.23264	590.596	656.662	641.428	0.174031		1.90412	145.945	167.121	140.205	170.571	158.769	131.277	1.70774	1.48848	0.524344	494.271	458.203	423.52	376.743	439.831	471.58		0.116595		132.192	143.186	137.117	8.27987	3.40183	6.53672	415.809	358.487	326.593
AGRN	3.21378	6.53089	8.43583	0.915519	5.19523	3.6658	15.422	19.003	17.6012	6.62216	5.67127	4.66957	18.2208	12.4871	13.8116	3.53475	2.12698	2.97777	9.58827	7.50708	4.21116	9.53649	5.15972	4.15574	3.74295	2.29344	7.30072	8.46116	9.18385	16.3756	37.2996	24.9902	40.6247	15.1518	9.11124	6.20022	8.34689	2.80163	5.20851	19.0955	8.48622	6.04181	2.56835	2.66069	6.99913	3.49169	7.96644	4.01585
AGTPBP1	11.553	7.30186	8.69422	21.3211	15.7238	15.7865	20.9202	16.9958	16.5419	11.2886	12.6782	14.2521	11.3025	17.348	15.0791	6.97163	7.74597	7.25106	7.92596	8.62104	10.4201	7.2648	8.38473	8.50421	8.23314	7.20856	5.51973	12.2694	9.33257	9.75685	8.16712	10.8027	9.61671	10.6462	12.9051	11.4483	5.40108	6.62104	6.66861	7.04086	7.81534	6.16242	6.91511	5.80186	6.24724	5.09827	6.54347	6.25494
AGTRAP	2.59883	10.1923	10.0674	8.61628	41.7986	39.662	14.6297	24.4344	19.7824	14.4266	11.4992	11.0086	13.7314	9.77165	8.5995	12.8284	8.90366	6.74907	21.4812	18.0643	8.021	22.9314	15.6596	5.33042	6.21547	4.51431	15.8646	14.9746	16.4563	25.4953	53.6361	47.7069	50.7334	11.3733	12.0183	6.56849	27.2537	14.7575	3.76453	7.94505	4.04685	2.92425	3.58565	4.79292	15.3455	11.4033	19.5357	19.4977
AHCTF1	26.7426	25.8465	21.6661	23.942	16.7858	16.4501	20.679	17.8032	22.2446	17.9994	18.1125	22.2387	20.8522	21.3669	23.0522	12.3195	15.8318	14.8516	27.4698	27.2591	29.3327	13.7236	14.178	16.3066	24.2785	25.0781	27.9253	19.5848	21.1234	18.5768	16.9601	18.9035	17.3688	7.46457	6.50732	8.05474	23.966	25.1551	26.4303	16.4751	16.5297	16.3939	17.2824	13.1293	13.6809	8.67391	9.21068	10.5263
AHCTF1P1	37.197	32.6746	28.7292	24.1242	21.8241	15.6868	21.3366	18.7674	19.3828	19.4079	21.3067	24.9095	27.292	26.2945	24.5022	9.40458	11.031	11.1031	31.9279	33.207	36.4144	15.9052	17.1156	15.4202	26.6462	26.5046	20.8084	19.9372	18.6469	19.4508	17.3476	15.4489	17.83	11.2221	10.5279	12.9277	27.473	28.0168	33.7153	8.52014	9.82475	10.2237	15.4347	14.5166	12.759	14.6265	14.4549	12.6341
AHCY	158.94	198.446	177.914	81.271	110.503	107.132	130.476	167.547	142.853	268.398	215.367	212.064	78.0633	74.6743	66.0763	141.141	114.627	121.616	109.117	106.822	86.1207	143.416	126.205	96.4694	54.1327	42.9833	53.9308	85.2996	84.2797	92.1421	51.0267	43.6924	45.8513	68.8873	75.3153	51.7499	104.219	100.499	74.5429	61.9199	44.2407	41.2227	47.5724	35.2403	56.8263	176.773	204.873	189.821
AHCYL1	93.5262	77.8537	76.5469	27.4978	23.4375	20.9915	71.8792	66.2352	70.0084	20.1698	16.5751	19.1154	19.0004	19.6769	19.4813	33.1195	31.6622	36.6938	31.2874	33.5508	33.8665	93.7343	96.5984	100.359	46.3647	44.7101	40.9196	72.273	71.0561	64.8883	109.939	117.257	103.074	25.4411	24.2285	23.0246	38.7369	44.5911	45.2423	38.5526	43.5872	41.308	32.2573	23.3907	29.2966	40.6846	36.7292	31.5704
AHCYL2	6.03356	6.57034	4.93902	3.96037	3.86653	2.65129	7.77306	7.59569	8.16376	6.23024	7.07076	5.71504	6.85756	3.63355	4.86191	9.18728	9.53692	10.0655	10.3529	6.74295	7.01671	5.27135	5.91354	8.70934	7.53224	7.76225	7.58057	3.44436	3.2525	3.55878	6.77248	7.03251	6.73244	4.45395	6.50714	7.92632	4.81659	5.88183	4.76557	2.92026	4.19128	4.07212	5.54876	6.77369	4.61382	3.25891	3.64952	2.64127
AHDC1	0.118907	0.267128	0.287486	0.368448	0.611198	0.903347	0.356258	0.998009	0.936807	1.23009	1.06021	0.478017	3.53088	2.70085	2.49689	1.42277	0.710691	0.826606	0.482287	0.396713	0.414571	0.32795	0.27326	0.226603	0.269373	0.178187	0.644675	0.242443	0.271054	0.691731	1.63093	1.96276	3.35291	1.71409	0.906782	0.46919	2.05937	0.920757	0.373385	3.19053	0.742008	0.724774	0.129924	0.116038	0.242543	0.0866458	0.707504	0.304355
AHI1	10.8218	5.6084	4.30833	20.2892	16.0475	17.4571	9.69714	9.06042	10.8373	4.49512	5.79742	4.38714	5.27675	5.12219	9.22097	11.8377	11.2126	13.3078	4.14133	3.94292	3.25809	8.48899	8.64441	9.07498	7.79654	5.7845	5.1556	11.0137	9.47799	8.34791	7.13355	5.24273	5.52456	8.73179	8.35621	6.61324	9.55745	7.98735	7.713	9.60987	9.13345	9.83594	6.28764	7.10757	2.93499	3.46637	3.29064	1.95661
AHNAK	109.457	92.0185	83.2707	44.2369	37.1295	31.1896	212.922	208.82	210.419	150.739	160.193	148.635	48.4298	52.6982	47.5215	34.5876	30.8229	37.7297	22.4066	24.9223	24.2442	159.434	156.462	163.098	106.634	95.074	95.2661	129.793	122.959	121.802	100.161	101.232	107.173	99.8959	102.774	100.111	136.924	155.049	146.311	90.8868	106.52	97.3218	33.3151	33.0534	29.1439	174.87	167.279	130.023
AHNAK2	2.58676	2.40637	2.54397	17.398	12.8991	12.3416	0.456528	0.415677	0.342237	69.1139	69.6029	73.653	1.89821	2.12701	1.65428	0.253945	0.176203	0.226216	0.308774	0.328902	0.435929	6.7315	5.49742	6.26637	1.25229	1.19425	1.35018	23.9774	24.6817	26.2374	11.4409	11.242	12.0058	0.801708	0.867748	0.941702	13.783	17.1151	16.1032	0.0804404	0.033656	0.0280899	5.78045	5.41485	5.8703	4.02078	3.61388	3.1566
AHR	26.0508	21.4317	17.7215	210.804	146.524	145.576	64.2985	56.4152	51.6262	54.8609	60.1073	63.2843	70.8311	75.0001	79.2599	16.2491	20.4824	21.0902	2.36539	2.00589	2.60992	38.3137	45.2524	44.6923	126.551	137.151	103.357	27.8508	19.8634	20.1277	248.939	253.627	238.62	14.2023	17.8071	19.7899	80.6654	83.5089	99.5889	37.202	47.5611	47.618	64.058	58.9581	70.7791	15.1878	14.9766	14.3348
AHRR	0.416941	0.980868	1.15126	1.6324	4.16143	4.32229	1.0172	1.725	1.20374	1.52333	0.597802	0.881782	1.70079	0.66882	1.51554	1.33561	1.27779	0.707675	0.529983	0.316214	0.386761	0.101812	0.165543	0.201911	0.0201939	0.100205	0.189456	0.300988	0.355216	0.614473	0.0390449	0.066585	0.260481	0.252065	0.242021	0.871867	7.03063	3.35329	2.48679	2.212	0.650134	0.557044	0.894392	0.21762	0.282622	0.166858	0.776733	0.664338
AHSA1	103.251	104.071	92.7138	139.615	124.984	128.689	106.214	118.354	95.6863	100.375	80.1206	92.2312	74.4115	74.0598	79.806	79.5891	81.2524	123.284	73.7746	89.2534	83.4699	165.652	163.564	156.279	184.931	170.802	161.067	80.662	86.0673	89.4994	57.5957	52.0616	56.2645	55.012	55.8912	65.7958	126.218	139.48	141.926	95.8866	110.34	98.1619	56.8413	43.596	60.2325	87.3483	107.696	91.8879
AHSA2	4.98092	2.81487	4.34656	1.63619	0.569013	1.05518	3.39641	3.88102	2.56623	3.08031	2.72273	2.54495	1.66424	0.600054	1.94251	4.49094	3.78555	3.0703	4.82271	5.83741	5.33271	3.34568	2.79323	4.39609	2.24858	1.13062	2.23489	5.3215	5.83661	6.59673	1.93416	3.32809	2.14422	6.07307	5.87686	6.27302	7.74672	7.81255	6.77101	4.42383	4.50048	2.59953	12.0693	11.7612	8.44606	3.3936	2.65927	2.64733
AIDA	22.3469	17.7404	19.3039	18.6231	15.4559	15.6336	18.7003	15.3127	14.4985	47.2141	49.5187	51.2932	12.8938	14.261	13.5344	8.30756	8.75648	9.34427	18.7037	19.6619	23.8571	12.2273	15.0112	16.0625	18.3192	19.8776	17.2382	20.5392	23.9574	20.3205	18.5573	19.7162	17.8486	7.17964	6.28804	7.8596	36.2539	34.6276	36.4573	6.58075	6.66419	9.26808	25.3989	21.2102	23.2597	6.0906	6.21021	6.09636
AIF1L	28.0809	26.6499	28.2267	0.0658694	0.287422	0.0832103	8.24913	8.84379	7.66444	20.0427	17.5252	18.6114	32.6718	33.6015	30.1018	9.90805	8.47085	10.5095	29.6723	33.7296	30.1264	20.0535	21.0412	17.0048	22.2017	17.1511	21.1789	7.18643	7.12577	6.1016	15.4567	15.1721	13.558	16.575	16.1051	14.4065	1.58265	1.72099	1.88659	11.2068	11.7718	10.9527	8.08702	5.69392	7.60625	21.2517	21.3037	17.1355
AIFM1	48.8316	48.3661	41.2482	68.8934	51.8285	51.6408	26.98	28.8537	22.862	19.588	15.3618	15.6285	18.5838	17.7828	14.5833	18.3482	19.9402	29.2493	16.6477	17.7013	23.2204	37.6948	42.5155	46.521	37.4898	34.7897	29.4159	18.3854	23.0572	18.3122	18.1131	17.5867	15.6652	14.3177	15.4925	14.459	27.5934	28.5362	38.6612	24.6691	37.3036	32.7315	19.0624	14.2904	20.3028	13.2567	12.7116	11.3035
AIFM2	1.36158	2.34229	3.32575	2.34666	4.69093	4.66974	0.150052	0.277479	0.506711	2.94222	2.64059	2.70488	2.49624	2.27136	2.02154	0.992571	0.958664	0.935079	0.200146	0.568711	0.0683134	2.56863	1.99773	1.56166	0.494213	0.224502	0.897782	3.1256	2.94661	4.55633	2.92114	2.13786	2.6262	1.87428	1.93838	1.06437	2.89567	1.68783	0.957952	4.17143	2.56982	3.26075	1.42524	0.990313	2.52203	0.100627	0.0734327	0.318983
AIG1	46.2781	33.5056	35.6667	13.9541	11.6498	7.37144	32.4019	32.7247	26.0698	41.5833	24.1036	35.2244	6.68365	5.34414	8.16088	9.44934	13.0572	14.0449	8.92501	10.987	10.7379	86.4834	76.5084	86.274	37.0022	43.6846	34.5716	105.494	89.5866	72.356	50.3452	52.1805	36.8548	21.6586	26.4039	19.5756	44.1418	56.7896	51.1046	11.1516	18.1257	19.6326	13.1035	10.1877	11.3641	46.1426	43.1592	29.4831
AIM1	37.3122	28.9997	32.1828	8.74742	6.99806	6.41686	1.12772	1.14873	1.08707	19.4819	21.2032	22.0207	1.22737	0.5562	0.845768	23.2102	23.6837	27.8282	21.5323	20.1852	24.3841	50.9653	48.2422	55.1008	52.1286	57.6772	45.3545	45.6295	45.2868	40.6488	35.963	36.3386	35.0107	5.76186	5.69264	6.3171	8.2194	9.16713	9.42924	24.6034	30.819	29.9841	12.1911	13.023	10.6068	10.9961	11.6044	8.71438
AIM1L	0.760438	2.23654	2.94097	0.0312539	0.35962	0.0674209	3.89809	6.45944	8.4116	1.39451	2.75268	0.8051	0.29724	0.218166	0.27348	2.41537	2.16792	1.47859	0.60673	0.113331	0.147693	8.4599	4.41319	2.42432	1.1269	0.636104	2.10505	1.2041	1.06169	2.55779	16.3161	16.6877	21.3757	0.476186	0.407727	0.186131		0.0160251	0.0515264	3.42815	0.934442	1.4918	0.600025	0.534425	1.45043	1.74282	2.53123	2.39405
AIMP1	55.044	40.5894	37.9039	34.9219	25.2375	23.4833	31.3824	34.6471	33.4497	17.5095	17.5409	26.4475	15.5315	15.6172	16.9692	17.4462	18.646	19.6449	35.3256	26.3893	32.0516	64.5006	56.165	61.0825	50.3996	45.0766	44.4658	15.9465	22.7792	12.339	29.9746	32.6966	30.0613	18.5692	17.2664	16.2085	35.0319	38.2344	34.8444	36.0171	43.3498	43.0044	27.2288	22.034	21.9914	29.3433	31.5114	27.4937
AIMP2	47.6945	67.7774	60.0155	43.4342	45.0975	44.4962	34.5837	34.3046	32.0042	32.4826	25.3736	28.9227	37.2021	35.6966	31.5069	14.2631	10.9627	12.8661	20.9869	20.1996	14.696	69.9681	63.1073	50.0638	35.5391	31.0052	34.6986	12.8482	12.065	14.7755	46.1099	46.5818	41.7829	19.8059	25.1002	21.7399	80.6002	81.4948	62.3501	33.9744	31.5212	25.599	19.0166	15.5776	26.4203	43.8481	39.2361	44.667
AIP	6.63617	8.69492	9.44919	12.4438	25.5709	24.4917	11.2866	18.1411	17.0516	29.9877	21.484	19.3071	19.8581	14.226	15.4806	23.3381	15.7352	14.6803	19.9761	19.8514	15.3482	22.8938	15.8313	6.01762	6.78211	9.30659	9.59847	11.4583	11.6223	14.0362	24.3185	17.396	25.5265	29.1336	27.2524	18.5593	23.2106	16.4687	10.2171	8.32572	5.34308	5.34177	8.77586	4.37524	12.9826	19.0456	23.223	22.8565
AJ271736.10	0.00192397	5.88161e-50	0.000509286	4.3212e-06	5.24457e-12	1.07181e-06	9.86087e-09	0.362715	0.0219274	1.39729e-05	0.19143	0.0155419	0.378772	0.758666	1.034	0.550435	0.436807	9.90736e-15	0.262846	0.33382	2.06648e-26	0.894066	0.310465	5.36481e-05	6.23856e-06	1.1917e-05	3.90049e-25	0.0184269	0.430785	4.83399e-08	0.0112998	0.309265	0.655537	3.95292e-08	0.000280798	0.0547252	0.64692	0.224692	1.34408e-27	1.10183	0.0223308	1.40646e-09	9.45827e-23	7.85717e-22	5.05061e-07	0.297472	0.663777	3.66393e-05
AJUBA	19.8917	13.0839	13.9935	21.6353	18.6284	19.9228	22.7191	24.5283	24.6884	17.8527	21.4832	14.5737	3.63365	5.11382	3.09839	2.19513	1.37162	1.8791	19.514	19.3575	15.8022	31.1364	31.5895	38.3656	35.3565	29.1172	29.655	6.29804	6.06158	5.04036	7.37012	4.98236	4.24847	7.38974	7.34727	7.09017	18.3628	23.247	18.418	7.50064	9.18502	9.17342	21.159	14.4062	16.7091	6.97002	8.13892	10.8652
AK1	6.79209	20.2409	22.9521	6.80733	17.8014	19.4912	36.2568	51.5114	45.0171	86.4162	60.3414	56.3312	23.0516	20.744	19.8762	14.1977	6.33405	6.71685	24.3421	20.7429	13.725	100.268	52.0432	35.8287	18.9005	11.7716	31.8989	20.1177	20.8182	40.381	55.2207	48.9157	55.7788	9.08054	6.75463	6.36977	21.025	17.2259	7.10036	24.8578	10.1928	14.0454	7.91102	5.54406	21.1141	16.8397	23.2547	32.16
AK2	151.702	135.922	114.298	165.337	156.821	150.984	76.9595	84.1615	71.2536	64.7447	52.2358	53.4713	77.6833	80.2578	72.9545	46.7214	45.167	48.5452	301.265	310.945	298.83	147.714	135.079	129.762	114.955	102.905	103.909	102.716	98.1089	104.131	201.65	194.212	166.84	41.2537	49.0349	37.1745	96.0319	124.971	102.341	59.5513	65.6108	64.1886	86.2597	63.8731	75.2434	88.5488	85.0745	72.5171
AK3	30.9082	26.4439	24.7603	49.7653	40.7052	37.0697	26.5824	24.5141	29.1135	12.3498	13.054	16.2829	8.30573	6.47478	7.68065	5.71989	5.00682	5.5775	10.0238	10.5846	10.0776	20.4292	22.4435	22.5311	35.1731	36.3143	31.2919	64.696	64.6692	50.4803	35.6346	34.954	33.8561	20.6295	20.887	21.3072	14.8186	15.2295	16.2218	5.22978	8.12862	5.96979	22.3723	16.5462	21.9412	22.6892	23.841	18.7973
AK3P3	0.573621	0.167496		1.02782	0.480561	0.436236	0.604475	0.927312	0.669697			0.316197	2.10789	0.562508	1.61828	0.897705	0.723205	0.627211	0.253632	1.26265		0.34232	0.58836	0.720072	0.0844032	0.318577		0.340224	0.0844456		0.0769747	0.087512	0.765296	0.412993	0.803873	0.281231	0.681457	1.50487	0.63058	1.33047	0.886563	0.378271	0.731689		1.78907	0.52018	0.288894	0.319684
AK4	4.01532	3.24166	2.3352	12.9555	10.1618	10.1316	0.79103	0.491808	0.717027	8.60453	7.88042	7.67175	17.9751	18.1027	15.6535	33.3409	31.8562	33.8246	0.758696	0.407552	1.09398	19.3897	19.4611	19.2424	37.3812	35.74	31.4135	6.25054	7.11051	4.24258	39.4403	41.3932	33.4214	10.2537	11.7919	9.83904	9.13834	10.6469	10.9372	0.0343119	0.0146517	0.0450516	6.55268	6.51816	6.14596	11.6534	11.7748	9.35605
AK4P1	7.92024	6.38597	5.86111	16.7713	15.6465	19.6624	1.32845	1.51883	0.522415	14.7945	12.51	14.0865	30.9913	28.8084	26.3745	24.9822	25.1603	31.9072	1.16114	1.34307	1.74406	30.0279	26.4082	29.2122	53.022	43.0693	34.4913	6.03731	7.61527	6.84199	55.677	45.7815	40.9193	13.7752	19.7763	16.7383	12.627	11.6816	19.6731	0.566033	0.440046	0.469448	13.3927	9.76546	12.6555	19.251	19.7839	9.57546
AK4P3	0.235755	0.0687138	0.0809581	0.493131	0.332183	0.301593	0.127713	0.0456366	0.425256	1.10275	0.586217	0.34893	1.97182	1.43578	1.09241	1.00471	1.28016	1.43125	0.0693711		0.289136	1.34251	1.19532	0.977665	2.12512	1.63864	0.857955	0.378031	0.401844	0.236299	2.71911	1.61365	1.6805	0.571083	0.832606	0.766655	0.659031	0.524154	0.574243	0.18763		0.560531	1.31013	0.721358	0.927941	0.656591	0.989738	0.789666
AK7	0.170962	0.054383		0.637114	0.438443	0.900039	5.34701	4.10073	3.00218	0.728069	0.596728	1.16148				0.531853	0.358311	3.52696	4.13185	3.19378	2.59813	0.948772	1.16391	0.985767	0.400755	0.264225	0.782609	2.31782	1.10371	1.21116	1.09776	1.01076	2.29732	2.76644	3.34012	3.55235	0.634885	0.653156	1.332		0.263003	0.0358285	1.21285	0.600007	1.2608	1.08734	1.07147	0.994784
AK8	0.67353	0.18291	0.511326	0.055199	0.135177		0.291416	0.167079	0.170184	1.39138	0.591714	1.54186	0.27386	0.149733		0.767242	1.33731	0.777092	0.730399	0.619282	0.179164	0.92879	1.27921	0.51447	0.337788	0.175993	0.0804006	4.02358	1.64388	1.57857	0.538446	0.042489	0.0389648	0.6421	0.695424	0.541008	0.437786	0.47189	1.10535						0.0640132	0.883443	0.633388	0.673925
AK9	4.17981	3.62261	2.32426	1.55546	1.1556	1.62811	2.00232	1.2547	1.73336	1.06023	0.943889	1.11048	0.922678	1.38822	0.923515	4.28779	2.83939	3.07979	0.828153	0.766852	0.299706	4.56371	3.8183	8.11665	1.6411	1.29584	1.127	0.363002	0.770863	0.96382	5.95417	5.75068	4.60224	3.62225	3.07371	4.98829	0.237086	0.137491	0.22715	1.63696	1.2961	2.24467	0.723863	0.306857	0.708009	1.50316	3.00381	3.5848
AKAP1	9.23084	10.5755	10.0785	7.78235	8.20888	6.50639	10.9558	11.7415	10.2557	18.4408	22.8813	16.8833	19.0444	18.5423	16.2687	5.42496	6.52955	7.26775	23.6908	25.9735	24.5045	19.2004	12.1751	12.3832	25.3384	19.8284	25.7604	15.3985	12.9415	13.1349	15.8029	17.8988	16.144	19.2563	17.2152	16.779	7.63877	10.8898	5.99549	25.8747	24.4979	24.1191	8.67482	9.29401	8.0559	11.4418	10.2485	9.72344
AKAP10	24.7386	19.4274	19.0449	19.3339	16.4843	14.213	11.4753	13.7174	13.6865	13.8157	16.5409	17.6561	6.08566	7.59937	9.57209	23.8317	22.705	24.5573	9.58372	13.7851	10.4631	15.1171	14.6978	15.2983	13.5891	12.8996	14.8461	8.02802	6.95427	7.04556	7.35391	7.14133	7.20942	16.1798	17.9694	15.6063	15.4733	16.3978	16.8333	5.56004	6.11569	5.90662	10.5953	11.4604	11.9376	18.1923	20.852	19.8349
AKAP11	16.8066	14.4581	13.8626	12.2126	9.34838	8.50527	7.95363	6.75403	7.10901	9.30346	9.75042	10.4245	10.0054	9.99417	10.1867	6.28537	6.83686	7.37256	8.56121	7.63606	8.64984	6.57308	6.78959	8.97424	9.85169	10.8167	8.72979	11.7317	12.1177	10.4823	11.8841	13.652	13.0705	10.1622	10.1	11.5913	6.32495	6.12065	6.29762	7.13869	8.42571	8.36493	6.37294	6.70318	5.60548	8.4663	8.20281	6.86213
AKAP12	2.50024	2.31718	2.28519	3.71065	2.90867	2.76227	25.0616	20.2819	21.737	3.93539	4.71435	4.52419	0.626562	0.137897	0.224372		0.0441789	0.119032	0.0472829	0.0250436	0.0275298	2.5661	1.69016	2.58826	1.0804	0.865037	0.738632	3.39647	3.09319	3.62781				0.107866	0.112246	0.0858599	7.09154	7.11181	7.13521	0.0391359	0.0365699	0.0727231	8.34658	8.21791	8.59572	0.529636	0.432397	0.278669
AKAP13	38.7316	29.4601	25.0688	27.1673	20.5992	16.9146	23.7115	16.702	14.3109	21.1282	20.7295	19.1481	14.1331	16.8798	13.9016	21.1894	21.657	24.3064	21.6063	27.3807	35.4078	7.09799	9.84155	12.6279	27.1821	27.0311	24.4006	18.6473	19.3822	18.8851	29.1207	25.0722	25.1246	23.0913	22.9455	25.0615	31.24	30.965	41.4187	16.5437	15.4043	18.6643	29.8696	23.718	20.2731	6.94742	6.55678	6.48258
AKAP17A	1.20452	1.66857	1.59218	2.8424	4.20166	4.49391	4.0073	5.24099	4.40038	1.26704	1.0786	0.796164	2.17898	1.84666	2.0161	2.95483	2.43643	1.82105	2.74318	2.63531	2.14348	3.14781	2.40142	1.89697	2.62519	2.73495	3.50464	1.24103	1.01143	1.92643	0.577338	0.800604	0.92549	2.60241	2.12317	1.79249	5.28229	3.31479	2.70384	6.13713	3.21393	2.72496	1.66753	1.17044	2.89886	2.15124	2.8545	1.92488
AKAP2	3.62279	2.75359	3.91688	32.3755	30.7312	29.4221	12.6505	13.0961	13.5541	12.2051	16.3147	14.5408	10.0142	10.4461	8.64903	0.115462	0.0226617	0.122775	24.4495	27.2597	27.2465	28.7147	22.615	23.8925	9.56422	9.78235	11.5945	17.2692	21.5843	20.528	5.33075	5.98892	6.32185	0.135149	0.0775653	0.266427	31.3569	35.4898	25.6565	8.5543	5.13254	6.96839	16.1468	14.1668	19.3194	0.526464	0.593487	1.28155
AKAP3	0.145836	0.530455	0.465056	0.823322	0.670871	0.421255	0.13716	0.548058	0.98409	1.7446	0.992277	1.03391	1.87926	1.98459	1.90077	0.400163	0.671572	0.0807705	1.87552	3.02233	1.12284	1.0661	0.635054	0.389329	0.867016	0.539336	1.48858	1.73354	1.13356	1.0492	0.375475	0.176824	0.10955	0.0243859	0.0134679	0.955042	0.0249911	0.0123426	0.671147	0.101851	0.941572	0.140564	0.88074	1.22019	1.11549
AKAP5	0.612933	0.398107	0.50424	2.60354	1.26302	1.67091	7.14684	4.99909	6.18381	0.464647	0.69929	0.323122	1.25537	1.03605	1.02092	2.62819	3.11988	3.45575	0.151191	0.0834899	0.246279	0.63335	0.374431	0.805588	0.360036	0.425575	0.420223	1.60709	1.10959	1.66721	1.53357	1.40431	1.20318	0.291964	0.398676	0.188721	0.938568	0.882559	0.923197	0.0994009	0.20596	0.0697813	0.239186	0.0786626	0.0416088	0.487136	0.350166	0.250159
AKAP6	5.96676	2.17288	1.51727	0.156682	0.055443	0.365437	0.506188	0.355436	0.63333	3.33637	4.67753	4.01593	0.702821	0.941779	1.35139	2.36724	2.11487	2.06189	1.05418	0.602351	0.739203	4.11387	3.71585	7.38654	9.55817	6.46102	7.81672	1.39306	1.7333	1.72946	4.09432	7.41935	4.83125	0.169279	0.28276	0.00934628	1.65081	0.418521	1.29083	0.940938	0.512441	1.51691	1.83245	0.579099	0.165591	3.15243	3.14677	1.60717
AKAP7	3.26353	2.02732	1.24681	1.83562	2.75322	0.51255	4.99651	4.63889	7.0303	6.11194	5.56749	7.68031	1.03876	1.11745	1.37871	2.80763	3.24125	3.28478	2.97053	7.66141	3.41385	0.319457	0.548284	1.05057	0.66116	1.27417	0.847058	7.44121	6.81723	5.73354				1.3028	1.25708	1.59225	2.96938	6.2197	3.55361	0.160034	0.127748	0.0906575	2.40839	1.54516	1.82711	1.31551	1.51466	1.32403
AKAP8	4.78986	5.55826	4.69185	4.94862	4.46305	4.21787	5.63154	6.22945	5.6183	29.8733	27.5881	25.1003	6.76196	5.73226	6.40802	6.1731	6.12793	4.91165	5.02509	4.17876	3.11832	9.87258	7.73065	8.02634	4.84751	5.29517	5.90646	5.35598	4.76109	6.20554	5.41272	5.57189	4.60646	3.75331	4.10022	3.25329	5.91383	5.03204	4.78413	5.08964	4.24504	4.16585	4.22682	3.09961	4.5144	2.97432	2.96147	2.43693
AKAP8L	15.1563	14.8018	9.98177	20.6297	18.5031	15.494	17.0383	15.5439	15.5655	59.5238	51.6779	56.5787	38.3946	29.5638	25.423	17.2515	17.2643	16.2689	15.7234	19.9367	18.8421	32.6452	28.9719	32.8429	17.0217	16.9504	15.9551	18.8681	16.9905	16.566	14.6192	19.5113	15.6503	23.0814	19.2814	14.2634	18.6564	20.5449	21.1685	17.2214	11.3468	11.8379	15.0149	12.4112	14.8583	12.1328	14.1525	13.9075
AKAP9	5.71671	5.59149	6.14407	8.54922	6.88221	4.80057	12.5827	9.22946	9.55952	6.42655	9.01246	9.22925	23.1946	23.915	26.5318	33.7629	29.6812	39.3123	12.6246	14.1024	12.7142	4.3298	4.7286	9.22947	13.5032	13.038	12.1612	13.9386	14.7659	14.7868	14.3112	14.5935	15.4311	21.0886	21.3014	25.8458	12.0822	9.76022	11.4277	35.4641	41.4022	44.4577	17.2679	14.8697	16.4787	6.21599	5.5722	3.56556
AKIP1	17.792	14.7454	14.6518	12.8072	10.062	12.4813	8.87246	11.3798	9.09293	16.4071	15.8822	18.083	6.00791	6.46296	6.57209	5.31451	3.74088	4.11514	7.07255	5.31435	4.44585	12.595	13.1059	15.4053	11.5318	10.6149	7.98456	7.09848	6.50774	7.86518	8.12831	7.41469	6.38534	4.41293	3.98272	4.41974	16.6654	13.0847	14.7073	6.53949	6.36813	5.49467	10.6381	10.4807	8.82686	7.96932	9.1307	9.75543
AKIRIN1	49.0608	38.5702	36.6071	37.9515	30.4324	28.9967	38.4342	40.3844	40.0847	20.9055	20.2092	19.8024	53.1001	53.26	52.5037	11.9304	11.7979	13.8074	47.904	42.7445	45.1389	31.9176	36.4049	37.188	33.8091	34.2058	30.6452	42.3166	43.7595	38.2524	33.3549	36.4659	29.1754	10.0374	10.5003	13.8962	33.668	40.6379	44.801	13.3585	14.0125	13.4133	33.4029	26.6811	29.6474	13.8971	15.2814	13.7588
AKIRIN2	12.683	8.54869	10.1442	15.459	14.5245	10.859	8.43021	9.32018	10.1055	5.46981	7.90241	6.91242	6.61856	5.58708	8.55885	6.73206	5.75219	7.65889	6.09069	6.26476	7.2473	11.8677	11.1262	14.8315	9.25091	11.0733	9.57856	5.39368	6.17349	4.43274	9.22216	10.1068	9.58054	12.7683	14.4992	15.1713	12.5886	11.3273	14.3099	3.43814	3.84124	3.69882	5.85938	6.43236	7.40691	4.53268	6.08131	4.52331
AKNA	0.319183	0.619723	0.822396	0.545237	1.3547	1.50622	3.45466	3.24474	6.57082	1.75824	1.76748	1.20954	1.65543	1.81745	1.45196	1.49618	0.91859	1.29754	0.331895	0.26962	0.102686	4.46	0.578481	0.417471	0.390704	0.458536	0.85327	0.450406	0.488	0.617766	2.68606	2.72259	2.7368	1.68221	1.27717	0.913423	0.76123	0.28814	0.128988	1.5911	0.942751	0.79698	1.54676	1.63843	2.39877	0.780232	1.17676	1.51038
AKR1A1	29.0676	32.6419	29.2569	63.7109	72.8936	74.0789	72.9452	84.7652	74.8574	58.1742	48.523	49.935	113.352	111.798	99.4704	58.4573	51.5484	58.725	20.8907	19.7434	25.8531	95.8278	97.5014	77.9634	83.4437	71.6041	75.5506	33.7777	38.3006	35.6017	159.527	149.969	126.676	31.3299	36.9457	27.0681	35.5821	45.268	33.772	80.9963	74.3613	60.5466	18.1551	16.7765	16.818	65.5729	54.8292	46.4749
AKR1B1	739.228	788.106	710.616	142.822	167.344	146.915	46.5964	48.9813	49.9813	0.0337466	0.134354	0.05621	7.24033	7.26714	6.14092		0.0615928	0.136355	20.0703	20.4546	15.8515	377.58	336.088	272.537	0.611627	0.639295	0.211326	96.5287	88.5504	85.9122	183.783	174.182	160.423	0.0584431			104.84	104.993	77.1494	0.201539	0.0313709	0.101557	263.588	207.653	281.385
AKR1B10	140.497	98.5748	111.203	3.67397	2.22303	2.76291	0.056969			3.88551	4.44994	6.7845	2.38663	1.65713	2.25761	1.7589	1.20256	1.19705	0.113214	0.304136	0.0912568	33.3805	41.2086	31.6176	91.2007	92.9865	71.151	3.81299	2.29508	1.90584	55.8479	53.9912	40.7273	0.350839	0.389031	0.233573	1.17781	1.11084	3.35569	1.34035	1.04697	1.05424	0.407227	0.558749	0.236102	0.0267034
AKR1C1	1.77692	1.41342	1.2111	3.75992	4.16039	2.4779	30.4014	23.9343	27.4077	1.73931	0.8774	1.24194	9.02345	6.0132	6.3787			0.0401533	0.288348	0.236116	0.456679	10.65	10.5952	8.5323	19.8428	16.8466	19.189	36.0739	35.6621	31.9387	19.6933	20.9852	16.4652	1.68843	2.07524	2.12774	2.10767	3.06645	2.18976	0.515505	0.352556	0.127127	2.02081	1.59767	1.86214	0.308486	0.359527	0.21147
AKR1C2	15.3163	13.3353	9.21605	0.565585	0.88352	0.306204	4.68216	4.8335	6.42035	2.01192	1.88366	1.92989	20.8972	19.4729	17.8978	0.257068	0.0684955	0.192352	0.0142466	0.0390571	0.122683	47.9806	52.392	48.736	5.3871	4.57336	4.40536	12.2622	10.9515	10.225	19.7081	20.4381	17.4338	37.7165	39.8915	35.8946	0.233532	0.312016	0.260266	0.0776065	0.0554815	0.124621	2.57043	2.48692	1.39562	0.749855	0.578885	0.416602
AKR1C3	3.82551	4.82023	3.23256	2.63964	3.24912	2.53307	2.16466	2.75469	2.76838	5.53495	4.33736	4.92443	2.18256	1.72364	1.99075	1.61451	1.91513	1.1455	0.0445176			32.9469	34.5037	27.8241	8.33715	5.87455	7.5735	11.9568	9.88045	10.3467	190.503	177.792	152.351	5.45105	5.07615	4.7137	4.04519	5.1672	3.45811	0.0686575	0.0179767	0.0193803	2.91784	2.04067	3.37447	0.86617	0.335375	0.463813
AKR1E2	14.8505	13.0362	12.2518	2.23604	4.05414	3.59277		0.175914		16.5718	21.5309	21.1287	0.119381	0.440046								23.4758	30.3648	22.3541	4.83762	6.51238	3.87362	13.5181	19.5151	11.5126	24.0492	27.0083	24.6283	14.1529	14.6954	11.064	23.7886	37.6051	25.4798	1.84041	2.76162	1.0454	6.68415	5.75442	3.99264	7.2889	8.24862	5.70613
AKR7A2	18.3263	24.6175	23.7829	11.7852	15.3537	16.9635	19.4634	28.6967	21.8424	19.0239	13.4023	11.9235	12.1103	9.41294	9.59762	27.7893	23.0697	24.093	7.79449	8.95775	5.9334	25.7177	22.2729	14.9728	12.9116	11.1482	15.2331	15.6308	16.1122	20.8263	42.9319	34.4741	37.1882	26.4313	28.0072	18.1889	24.5828	21.2599	14.0444	9.41112	6.05037	5.7156	7.93202	3.6556	11.2761	23.4809	21.6001	26.6872
AKT1	13.9477	39.0211	41.0717	21.5335	68.0495	72.4507	23.9437	32.6919	25.866	149.388	119.821	96.2505	63.1074	56.6081	49.754	85.1804	62.4479	63.491	28.5022	30.8401	11.817	46.49	27.5091	13.8486	17.3839	13.4583	36.94	23.3712	25.2727	35.6119	69.0398	56.577	66.4001	48.9678	44.3198	34.725	67.8184	54.5785	17.3971	55.3899	26.2952	26.6982	5.95053	5.47795	20.3634	22.1801	36.3909	32.0743
AKT1S1	4.38791	7.02018	6.90852	2.65022	5.33221	6.24341	3.8886	7.09141	5.85187	7.11433	7.41857	5.03758	4.65726	4.36249	4.48048	10.2562	8.76115	9.87036	4.21708	4.42106	3.34712	3.53336	2.58561	3.42104	3.42424	3.33711	5.39759	3.32697	3.6256	4.22087	12.1669	12.1487	16.4766	4.44359	3.55823	3.42304	2.62712	2.69786	1.45304	17.5641	10.478	12.2438	1.82724	1.52942	2.50038	2.34338	5.34148	2.77475
AKT2	26.5512	40.7042	49.0509	24.7489	37.3879	45.1911	44.3708	58.2562	46.5165	54.2028	57.5482	42.037	45.0557	50.808	38.1461	88.6389	70.9799	74.2888	27.3934	29.978	18.6689	52.3917	36.9791	25.6373	41.1656	28.1905	48.875	43.0545	36.5476	52.0327	71.7318	69.8965	70.0412	55.394	52.1835	39.035	14.1023	14.1574	6.45893	128.136	70.5616	66.0333	12.4899	8.84124	15.2948	23.2468	34.6307	25.2895
AKTIP	16.1524	17.6423	11.8413	5.02155	4.27593	2.62264	8.74904	9.79659	11.0741	10.5787	9.35	10.1904	5.87993	2.26747	4.11786	13.0331	15.0006	15.4565	1.34843	2.136	1.55137	23.0668	29.7058	24.1522	35.8732	24.8827	24.2927	21.4992	23.5918	17.098	9.19506	12.5446	10.2722	7.40509	7.99849	7.44442	1.75023	1.14988	1.38005	13.9212	15.741	13.8437	6.32051	6.35232	5.29403	14.8624	13.9978	12.1754
AL021068.1	0.797255	0.550803	0.830157	0.833044	0.676789	0.830117	0.285901	0.34228	0.521632	0.160576	0.15311	0.187336	0.322866	0.128019	0.182808	2.17964	2.03222	3.0902	0.922357	1.16269	0.535677	2.13799	1.75633	1.51805	1.33018	1.03173	1.26454	1.66725	0.603054	0.62278	1.63508	1.73708	1.42747	2.42052	3.27279	2.66726	0.0571048	0.142579		0.639603	0.866202	0.741541	0.649896	0.878777	0.883149	0.411689	0.478661	0.329432
AL021546.6	2.06866e-21	2.39736e-12	2.35607e-14	4.89746e-16	6.50989e-09	3.66819e-09	1.01037e-07	1.11952e-05	1.94471e-08	0.230135	4.96288e-07	2.32377e-07	1.03754e-06	3.77777e-07	1.23306e-05	3.49835e-07	5.59917e-07	1.45605e-10	1.65899e-09	1.13886e-15	1.0973e-06	4.9873e-11	1.47465e-18	2.95385e-18	3.62259e-16	7.82398e-10	2.62951e-15	1.22271e-15	3.2423e-10	3.53271e-14	1.53007e-07	9.13978e-10	2.55935e-06	6.44662e-06	0.922087	1.80398e-17	0.490336	2.67043e-12	1.10445e-26	3.11335e-06	6.04688e-09	5.28798e-08	2.49733e-08	3.02151e-12	3.11755e-26	1.01453e-43	2.89286e-14	6.3224e-16
AL021707.1	1.89595e-226	6.87399e-13	0.0490024	1.9124e-107	0.00684528	1.06462e-59	4.99188e-37	2.79111	0.627144	0.00258691	3.23053e-22	6.88737e-16	2.2852	0.616357	8.10145e-06	2.14849	2.89288	9.1571e-05	1.83572e-21	3.17385e-84	1.08288e-31	1.28612e-50	5.47308e-56	5.91797e-95	1.80385e-78	6.65413e-78	0.931335	4.88244e-14	0.00927021	6.66557e-31	2.77789	4.3759	2.59009	0.758866	0.774762	0.113831	1.08415	5.02558e-38	3.16006e-103	8.62645e-78	0.269444	5.77018e-24	5.78998e-169	5.19605e-80	3.56377e-29	1.10453e-87	0.032341	3.97231e-24
AL021707.2	2.74421e-186	8.3207e-151	2.11638e-163	8.56661e-235	2.51425e-47	0	7.67976e-96	2.10675e-27	7.36484e-259	4.09644e-95	9.5732e-132	1.15447e-105	1.97263e-67	2.88005e-74	5.669e-71	1.30997e-213	1.19397e-11		1.78218e-245	3.48698e-252	1.32139e-119	4.88006e-102	5.897e-100	2.64848e-134	1.6957e-150	2.184e-111	1.73066e-260	2.05804e-71	1.96496e-204	6.2477e-105	3.36226e-136	6.64842e-282	1.55742e-73	4.00455e-18	3.39141e-65	7.05174e-244	2.24112e-112	5.87768e-152	1.86725e-106	2.26385e-88	6.08855e-250	4.16217e-142	1.39114e-199	3.78917e-171	8.17918e-234	7.29108e-153	7.81728e-139	9.96124e-19
AL031666.2	0.261977	0.455895	0.102303	0.169794	0.118999	0.237801	0.0175514		0.0805076		0.0942243	0.0495013	0.0795533	0.0790608	0.360749	0.111903	0.13305	0.0755846	0.4449	0.471815	0.289752	0.210246	0.279205	0.0730756	0.37368	0.438765	0.424732	0.159455	0.0354422	0.121533	0.146685	0.0181304	0.252054	0.428421	0.529232	0.337662				0.590829	0.165586	0.278681	0.534207	0.813877	0.639092	0.0544121	0.123442	0.022633
AL034548.1	2.0442	1.57992	1.27316	3.76037	2.0031	4.4074	7.72493	7.71039	7.96128	3.14756	3.43969	4.35057	5.53972	5.95983	5.90935	4.00106	3.25704	4.8209	7.93465	6.87237	8.47376	5.51553	6.42146	8.28927	4.2941	4.04669	3.81144	8.73783	9.54088	6.92273	1.80141	1.87232	1.00633	2.09222	2.66593	4.15554	3.82305	4.71949	4.38698	4.50308	5.10418	4.78184	1.57778	0.99716	1.2765	5.24919	5.33467	5.96309
AL136218.1	16.361	0.000319944	1.19428e-66	11.7047	9.57517e-14	3.21618	18.7557	17.5791	4.46779e-23	0.142848	0.757476	6.12816	1.97193e-56	10.6252	0.218916	3.56785	2.04968			1.03276e-40	27.9366	1.53082			2.10802	4.34524e-66	2.33912	1.03984e-106	3.77482e-91	9.37338	2.47692e-84	1.2518e-97	9.90457e-39	6.83551e-14	2.4612e-92	2.92174e-33	1.50234	19.5895	13.5922	2.2858e-11	0.000702869	3.33061e-40	28.71	15.1821	4.2054	3.83128e-09	1.72652e-22	5.39176e-81
AL136419.6	0.0202238	1.50715e-207	0.120226	0.111878	0.0936927	4.00651e-103	3.03816e-246	0.0968933	0.145523	0.266704	0.272523	0.192094	0.280261	0.318251	0.0544224	0.0311257	0.0540199	2.97656e-118	0.0744555	0.0506828	7.17441e-238	0.0211304	0.442822	0.139238	0.175129	3.97209e-204	0.0195018	0.169687	0.226403	0.305117	0.051717	0.177555	0.0948294	0.572339	0.362078	0.688048	0.17581	0.200163	0.0705502	0.476227	0.102084	0.25513	0.160666	0.726814	0.149697	0.270312	0.0642451	4.83266e-147
AL139099.1	0.180581	0.0928538	0.0467433	0.0233802	0.163237	0.316083	0.0600671	5.50521e-133	0.137785	0.135408	0.180953		0.16088	0.0811683	0.0647822	0.127835	0.234229	0.0517314	0.0243643	8.75757e-65	0.0283144	0.0962079	0.215309	0.0251001	0.140134	0.0446317	0.194138	0.242814	0.315497	0.605738		0.274935	0.0510555			0.0335639	0.0964102		0.051138	0.0540088	0.151345	0.0272528	0.287581	0.148566	0.489039
AL139385.1	9.78472	8.04893	5.0242	7.50666	1.96149	2.96083	1.28095	5.3282	3.07536	8.78998	3.11166	10.4226	0.925019	0.263415	1.26615	3.00209	6.97092	9.05067	6.13604	2.99679	7.56619	11.0661	16.3763	12.0449	6.20845	3.80384	5.38719	3.66519	5.74422	1.86351	0.875185	3.537	3.88559	1.8435	1.34801	1.73264	7.75587	7.43145	6.56072	1.74474	9.68884	8.01504	3.94324	2.52864	3.11067	12.3172	1.71329	3.80524
AL139819.1	9.87632	8.21574	7.27299	384.932	350.51	320.854	117.193	113.265	114.803	43.2181	32.4116	51.8117	35.564	29.5785	34.7718	128.247	155.415	229.395	160.621	184.816	159.181	118.313	111.231	116.171	39.3421	33.125	39.4525	127.085	126.947	114.319	76.0076	81.4105	67.7631	54.9086	51.5051	64.894	2.27749	2.06834	3.02975	51.0451	65.6952	75.9623	45.2385	42.4464	51.5953	61.3532	73.6579	39.7536
AL160471.6	0.122846	0.272569	0.270472	0.498058	0.252783	0.11552	0.620482	0.365969	0.570859	0.126794	0.360282	0.417869	0.378954	0.186638	0.213974	0.236794	0.239679	0.237867	0.11213			0.61686		0.176282	0.384264	0.625353	0.112539	0.449219	0.391489	0.190847	0.307042	0.0576395	0.11306	0.381057	0.118732	0.87276	0.335989	0.342018	0.711702	0.438209	0.116871	0.627121	1.3292	0.512748	0.770601	0.286709	0.115676	0.496561
AL161915.1	0.0967836	0.0653581	0.0438983	0.197412	0.178822	0.188265	0.158427	0.197333	0.232978	0.0254201	0.145638	0.297288	0.384084	0.279588	0.116054	0.336146	0.391159	0.340186	0.251763		0.159616	0.158063	0.31453	0.188481	0.0438372	0.230439	0.296248	0.0684133	0.0911861	0.0520799	0.523799	0.677026	0.648047	0.242704	0.267289	0.127662	0.226316	0.202598	0.264114	0.73541	0.54482	0.588823	0.196434		0.290135	0.770138	0.428162	0.669035
AL162151.3	97.6406	226.325	267.006	139.836	382.079	274.689	892.721	646.36	559.114	1147.15	550.134	533.815	401.338	403.115	474.193	808.875	637.465	788.562	425.226	313.045	161.078	376.887	109.664	160.167	131.623	101.459	254.131	151.069	118.136	239.746	406.166	192.319	350.066	531.476	198.918	269.491	382.664	425.583	118.547	721.642	379.302	383.415	79.3562	22.8834	234.511	380.99	526.263	491.826
AL162407.1	1.44872e-07	7.03992e-07	2.18397e-07	4.09255e-07	7.10658e-07	1.09396e-07	4.48797e-07	1.38066e-06	1.3382e-06	2.94993e-07	4.4031e-07	6.09607e-07	2.07073e-07	4.63046e-07	1.26604e-07	3.09452e-07	1.34629e-07	5.65356e-07	9.89989e-07	2.0988e-06	7.59672e-06	9.40491e-07	8.61411e-07	7.96469e-07	9.8398e-08	2.03466e-07	5.69637e-08	3.61419e-07	3.68364e-07	5.21831e-07	2.62194e-07	4.39329e-07	2.12236e-07	8.23982e-08	1.43189e-07	1.1316e-07	2.19124e-07	4.99548e-07	1.37957e-07	2.1292e-06	6.82411e-07	3.65293e-07	3.40592e-07	3.23624e-07	4.49615e-07	4.12781e-07	2.89293e-07	8.72227e-06
AL162497.1	3.10659	0.270698	3.02969	0.308143	1.18372	0.431689	13.3482	7.33448	6.03114	50.9104	49.0266	59.7965	0.862234	1.66796	0.732462	1.25719			1.50007	5.55398	4.02875	4.78312	4.6093	4.87624	3.50809	4.01605	1.57944	7.7891	6.05271	10.1623	0.608362	0.664514		6.58863	5.07569	5.48969	5.90045	5.04857	4.39297		0.556127	1.76877	6.02101	8.70008	5.82494	0.70491	0.433689	1.79551
AL163636.6	3.73635e-05	1.81538e-08	0.508534	5.67445e-06	1.18594e-05	1.41417e-09	0.000157713	0.280188	1.10231e-05	1.62281	1.39027	2.086e-07	6.06537e-07	0.364685	0.179865	1.00618e-07	0.641481	0.177284	1.17451e-10	9.0748e-08	0.000113536	0.000988481	8.00556e-05	0.528959	1.54052e-07	8.06575e-05	0.151416	8.67818e-07	1.60007e-08	1.09555e-05	1.07564	1.75063	0.340972	1.99587e-08	3.72488e-05	4.25905e-05	2.79553e-07	9.92513e-09	3.00865e-08	9.24307e-05	0.00107013	4.4626e-05	1.70429e-07	1.28882e-08	2.34851e-08	2.48557e-05	0.338869	0.00136767
AL356740.1	7.67505	2.34739	1.43489	3.23708	0.361299	0.095627	14.5994	7.02775	5.14407	3.53376	4.77785	3.65662	17.0837	14.693	15.9249				2.85052	0.718136	5.34003	0.792632	1.16289	1.72724	7.02472	4.0405	2.87473	2.66358	1.37688	1.30437	0.1738	7.56972e-64	1.12877	1.05807e-193	1.57839	1.12198e-08	2.76889	3.1729	1.85721	8.78972	14.1096	6.4191	4.53808	0.351755	2.44553e-150	0.731736	4.22486e-231
AL357673.1	0.274136	0.426593	0.194828	0.636049	0.517812	1.17994	0.858577	1.35948	1.00263	0.321391	0.445881	0.552266	0.535628	0.774857	0.607425	0.791525	1.13308	1.04947	0.305202	0.539288	0.422712	1.08599	1.05388	0.923402	0.567511	0.569813	0.259946	0.332621	0.332812	0.281289	1.1317	0.961683	0.867735	0.195794	0.21616	0.178489	0.516052	0.482041	0.304291	0.787506	0.420422	0.357642	0.249188	0.0590822	0.184194	0.414618	0.635574	0.166426
AL390877.1	1.17653	0.53928		1.71148	0.953895	0.632355	1.38004	1.74627	0.230251	0.248962	0.33926	0.288716	0.235818	0.337599	0.9184	0.331445	0.327783	0.321404	0.1018	0.109494	0.577909	0.539525	1.96278	0.45704	0.219473	0.20128	0.734788	0.6257	1.12215	0.228513		0.682923	1.11154	0.609322	0.21214	1.11249		0.476973	0.554228	0.236028	0.109565	1.13995	0.29844	0.206604	0.216111	1.1546	0.203621	0.502759
AL450992.2	0.490516	0.837474	0.800784							1.28946	4.33402	0.513121	0.624717	0.906311	1.57456	0.146282	0.146	0.144244	0.954602	1.02278	0.312858	0.846179	1.36983	2.08816	1.69281	0.263129	1.115	2.2127	1.7739	1.5372	4.32503	7.8553	4.6403	1.6159	2.43747	0.451078				0.776152	2.4583	1.83052	1.33694	0.55401	0.433352	2.10631	1.01378	2.38723
AL513327.1	1.70393	0.67698	1.40519	1.83696	1.30327	0.331497	3.57618	1.77013	3.6519	0.159731	0.282499	0.642429	1.29879	2.30504	3.61325	0.364057	0.00149835	0.639606	3.86181	2.92788	4.80444	0.523788	1.69192	2.82143	1.89698	1.98781	1.21464	1.49784	1.41511	0.180282	2.48216	3.78364	1.71922	0.874448	0.427734	2.69354	1.95127	1.89146	1.22873	0.318458	1.27306	0.834105	0.649983	1.18584	0.369345	0.231014	0.175495	1.49265e-29
AL583828.1	1.56201	2.60153	0.325481	1.94015e-08	0.000819184	6.45447e-06	4.39825e-07	7.45139e-16	2.31801e-05	7.07748e-12	2.73082e-05	0.226437	2.76703e-05	2.40758e-05	0.0485752	2.3967e-06	2.53637e-05	2.65195e-05	2.69343e-05	2.81e-05	8.37191e-06	1.37334	1.60055	1.18722e-08	2.30479	0.629639	3.79055e-07	6.4983e-09	1.05643e-19	1.05333	0.74567	0.778448	2.70423e-05	6.58457e-06	2.3227e-05	0.509617	2.00509e-05	2.08849e-05	3.36366e-06	1.35631e-06	1.13038e-05	4.25336e-06	0.363126	2.67198e-05	0.727881	7.04325e-08	1.7287e-05	0.0481323
AL589743.1	21.1869	20.4276	22.2366	0.280915	0.641154	1.39036	4.75302	3.33446	4.13835	18.8484	19.2341	17.4705	34.7414	35.2021	31.4457		0.0062816	0.00936742	7.72199	7.23264	6.74049	23.6971	21.6239	20.9283	19.1872	17.9436	16.8975	9.54175	7.94289	9.05789	8.90542	12.594	8.86351	11.8223	12.4033	8.59694	23.7804	21.424	20.9388	29.7904	29.6478	23.8936	9.81476	8.76277	8.65024	10.6019	9.27991	7.23341
AL590369.1	73.1693	65.9124	62.4123	62.3225	49.4014	26.1124	2.94127	0.762417	1.08316	2.82324	1.04221	4.19575	0.00230102	7.84255	6.36562	5.5927e-15	1.39358e-10	0.0726967	0.26202	1.12093	0.36764	104.113	101.52	87.725	231.415	194.084	197.962	15.2299	14.5479	9.05248	22.2447	25.5275	13.1944	4.16642e-06	0.324707	1.56631e-05	0.00640219	5.69556	4.09488	9.91374	21.0539	16.4764	106.568	81.3907	102.568	15.2347	14.5973	9.80475
AL590710.1	3.34265e-31	2.77124e-17	2.50985e-11	2.89127e-22	9.53249e-18	2.12137e-07	5.58996e-21	1.66273e-07	4.42743e-16	1.34064e-17	1.1838e-25	5.65598e-24	1.18485e-16	5.79747e-14	1.30491e-22	3.55915e-17	1.87644e-08	1.6521e-29	2.49043e-14	1.45358e-11	2.70333e-27	5.53377e-06	3.55319e-17	1.04974e-14	5.70297e-36	8.6442e-14	2.07857e-12	3.58901e-26	2.83928e-14	1.36873e-21	1.24389e-19	1.49436e-09	9.41807e-13	5.70562e-27	5.57743e-15	7.97746e-25	3.76072e-24	1.20942e-21	1.23953e-25	8.8405e-19	1.23886e-43	2.53574e-28	1.28493e-20	4.09025e-22	3.93656e-38	1.72552e-44	6.94669e-18	1.21269e-19
AL590762.1	2.02266e-275	1.97044e-50	6.08885e-17	1.88302e-81	8.14215e-43	8.87773e-64	1.68777e-39	7.03981e-36	1.51845e-24	1.60378e-41	1.96717e-63	1.42186e-50	4.4055e-59	4.35896e-34	1.0181e-33	2.00617e-43	1.22876e-34	2.63802e-34	2.25933e-31	3.51251e-24	2.93498e-41	4.8696e-125	5.93247e-159	4.01184e-193	1.19773e-108	3.65195e-98	2.76837e-48	1.58813e-33	1.50208e-58	3.27458e-35	3.55668e-55	2.26648e-27	6.93567e-26	3.792e-58	2.08548e-46	4.74067e-48	4.43754e-37	6.9995e-53	1.41056e-59	6.18033e-17	2.22052e-30	1.0989e-23	1.16372e-46	7.15663e-39	1.82809e-31	4.78305e-24	1.85731e-147	1.3156e-32
AL590762.6	1.53093	1.51615	1.91648	0.822074	0.51082	1.29675	2.02187	1.3799	2.03084	1.65378	2.13561	1.51112	0.916192	0.795905	0.458258	2.57507	2.20691	2.28197	2.15347	1.43646	3.20878	3.00386	5.35808	4.02362	5.75357	5.33828	3.45007	0.813106	1.34466	1.92917	1.38818	1.02293	0.451029	0.526571	1.32659	0.596641	2.17319	1.51137	1.5317	1.00985	1.41296	1.70623	1.5542	0.638184	2.94348	2.02524	2.20506	2.93837
AL591479.1	0.0174011	0.109968	0.206341	0.0947568	0.258444	0.51093	0.16332	0.338699	0.224883	1.21053	0.806856	0.506926	1.01825	0.975419	0.976074	0.156254	0.0530924	0.0703802	0.215411	0.245989	0.250555	0.304366	0.129953	0.0339984	0.110618	0.151226	0.131786	0.758706	1.33645	2.39548	0.971342	0.911334	0.989158	0.901294	0.730433	0.314439	0.621436	0.210556	0.0173555	0.38498	0.291152	0.259483	0.142093	0.134722	0.595047	0.236404	0.467544	0.505856
AL591684.1	0.0251423	2.37222	4.01088	2.36165e-05	3.59132e-05	2.92615e-05	2.80637e-05	1.98012e-05	3.2853e-05	0.207631	0.098175	0.0577207	0.571927	0.108539	3.66711e-05							0.286447	0.5228	0.102915	0.43203	0.448893	0.721318	2.75723e-05	2.9408e-05	1.43564e-05	2.61702e-05	1.74711e-05	2.81126e-05	2.64435e-05	3.04395e-05	3.14048e-05	0.0909965	2.75068e-05	2.9282e-05	3.22214e-05	2.96499e-05	1.26192e-05	3.05392e-05	2.89823e-05	0.0204612	2.54583e-05	1.82565e-05
AL603965.1	5.13529	5.08119	5.60719	0.0845406	0.0720549	0.041947	0.174615	0.245349	0.473014	2.12875	2.15927	2.56457	1.22074	0.932972	1.02922							1.07477	0.986078	1.03132	2.81231	2.85172	3.24353	0.301402	0.490074	0.578263	0.221047	0.0831895	0.106613	0.198552	0.194973	0.106234	0.547624	0.390321	0.493722	0.902011	0.500494	0.976967	2.32589	1.98017	2.23454	0.0207975	0.00707151
AL627309.1	0.0259342	0.126354	0.227462		0.0135071	0.073058	0.0888679	0.105392	0.12548	0.0197051	0.20021	0.0441447	0.0493164	0.0778836	0.0878849	0.143924	0.248241	0.105636	0.0465841	0.221218	0.101619	0.086833	0.166429	0.134266	0.195033	0.161274	0.428901	0.074811	0.172409	0.300712	0.274194	0.334172	0.490129	0.556444	0.262398	0.188807	0.0751373	0.0142015	0.0114299	1.98735	1.22724	0.870741	0.377002	0.0769342	0.516341	0.116187	0.28446	0.0285268
AL645728.1	0.345627	0.264151	0.219492	0.178297	0.358563	0.797881	0.228062	0.296676	0.309409	0.256267	0.0973419	0.763457	0.717373	0.70835	0.405491	0.0480343	0.292266	0.0967312		0.145386	0.317094	0.136193	0.134868	0.142514	0.177281	0.0421652		0.364651	0.136354	0.569455	0.24988	0.140246	0.230028	0.485771	0.628022	0.558136	0.590021	0.64203			0.0474069		0.0490552		0.578206	0.0931573	0.502791	0.462072
AL645728.2	1.16568	2.2155e-05	7.35557e-06	1.70274e-05	1.03463e-05	1.68203e-05	7.97742e-07	2.40002e-06	8.65843e-06	0.000204823	1.54889e-06	7.99023e-06	4.95185e-05	0.000429786	3.47839e-06	1.04758e-05	1.47202e-07	1.35354e-06	7.48307e-05	1.60473e-06	5.7307e-05	8.02331e-05	9.39529e-06	0.971654	0.567722	0.761399	5.92993e-06	2.72188e-05	0.00441148	1.55034e-05	4.17484e-06	0.212352	2.72291e-06	6.32713e-06	7.38794e-06	4.67755e-06	1.28045e-05	5.6424e-06	3.17893e-06	1.36373e-06	2.51931e-06	0.0601441	0.14953	0.0727142	2.09436e-06	2.95827e-06	3.41826e-06	0.0936872
AL672183.2	0.832396	2.12237	1.32264	0.308108	0.506476	0.866074	2.507	0.574208	1.13634	2.4536	1.35254	2.2456	0.122307	0.751095	0.241752	0.205641	0.812892	0.489154	0.479589	0.456309	0.635227	2.95571	1.25396	0.401137	1.40281	0.588621	2.21831	0.725555	1.35321	0.917563	0.797828	1.30786	0.767916	0.232484	0.102798	0.368296	0.995663	0.552651	0.0354329	0.0937196	0.697599	0.317076	0.28003	0.165993	0.231063	0.457878	0.443182	0.322105
ALAD	3.47344	9.21005	6.44368	2.54321	3.51352	3.68674	11.4074	9.6961	10.2553	5.32449	5.26698	4.80656	3.30885	2.0755	2.54583	6.03967	4.40472	4.89332	4.61906	4.28076	3.07914	5.04572	3.84707	3.50521	1.63486	2.34896	2.50748	3.99796	4.46841	5.47766	7.39966	7.09178	9.13741	8.09442	8.23193	5.2647	3.13309	1.78329	1.28149	12.9273	9.39355	8.66558	1.73737	0.891366	1.87691	5.27655	6.77199	6.22287
ALAS1	29.5415	29.8715	27.6518	45.509	42.1973	40.7183	18.5052	19.9218	18.6886	33.4523	27.5769	28.6102	25.165	25.2589	20.2524	22.3576	21.1382	25.2136	35.1957	31.5495	29.2771	69.4048	58.8837	56.6467	9.00851	9.30915	6.87165	16.4956	16.6108	15.3027	20.2137	21.2969	16.6347	8.46231	8.36683	7.02902	18.6307	21.5249	17.969	20.6232	19.9908	17.7172	16.4445	13.2436	16.0503	23.7941	21.8185	21.1137
ALCAM	3.18321	2.48392	2.17067	168.685	125.05	113.077	51.3834	48.0385	50.491	62.132	64.5569	72.1481	73.091	79.492	81.8437	53.9572	58.3597	72.0441	0.0178243	0.0828414	0.0545477	15.6805	14.4504	19.0169	99.3885	94.1548	81.5326	1.91632	1.54588	1.77131	67.4403	69.4384	62.7515	19.8286	19.2398	19.5736	60.1918	68.8097	76.2599	6.66314	10.4047	10.8781	42.1798	36.76	36.9549	32.5759	27.8868	24.158
ALDH16A1	1.20041	2.73601	3.61417	0.320201	1.5519	2.05102	1.1774	1.71621	4.366	5.49227	2.7026	2.47684	1.98614	1.21421	1.43315	8.12963	4.91597	2.88322	1.33392	1.50519	1.13763	1.52838	1.11746	0.807505	1.11776	0.548979	1.42237	0.273898	0.336798	0.967606	1.26094	1.15806	2.37016	3.57661	1.98305	1.1498	1.76552	0.514451	0.297011	3.17713	0.874381	0.704295	0.289968	0.234311	0.378321	0.723174	1.52921	1.70141
ALDH18A1	22.4174	20.3157	18.1858	86.2504	74.7173	71.7987	46.3322	49.1119	45.4092	25.9607	23.63	23.8665	47.6852	46.9308	43.6729	26.4123	24.1732	28.9746	31.0148	31.1813	31.4649	26.0061	28.3908	22.2803	40.4916	31.1879	26.4978	29.4428	26.5252	26.458	25.5194	27.2203	22.8359	27.1946	29.6445	25.226	35.6826	38.9454	42.6527	15.1889	15.8885	15.3435	28.7803	24.0309	23.8551	40.2192	41.8136	37.7129
ALDH1A3	331.15	306.26	279.342	30.2288	24.9633	21.1104	0.0241914	0.0132155	0.111277	233.484	215.889	216.19	145.701	136.36	123.02	98.9554	98.6179	117.935	0.639853	0.774834	0.515251	250.75	222.818	230.52	645.54	613.396	600.373	211.203	194.946	184.006	24.6039	26.275	24.4446	0.567974	0.639381	0.6221	6.65717	8.39356	6.99472	16.4645	14.4082	12.8988	190.823	150.297	182.966	8.86719	8.19247	7.67615
ALDH1B1	15.4191	17.7395	16.3575	21.1542	24.6471	24.2465	12.689	13.314	11.926	21.3597	17.8968	17.4747	11.5912	11.8244	9.94359	1.38329	0.971778	0.939859	16.0922	14.5605	12.9387	14.9023	14.4804	10.1694	16.1235	14.5339	16.0814	15.1273	15.0402	14.8892	17.2746	16.209	15.0892	5.65901	5.28458	4.55171	9.27657	9.95091	7.56453	3.40304	2.78042	3.54143	4.51359	3.54713	5.76586	4.03789	4.47546	4.58478
ALDH1L2	0.34409	0.173044	0.774042	6.67125	6.74684	5.18031	3.81333	2.50637	8.88056	4.40282	5.29125	5.56953	15.2729	14.5873	14.735	0.0590338	0.0541125	0.241646	6.81908	6.29949	9.15945	3.99444	3.73321	4.20371	1.41145	0.368257	0.725691	1.24188	1.00244	0.984394	13.8454	14.3398	12.4066	0.0945706	0.158534	0.0545383	5.79438	4.89631	5.62947	0.877781	1.7181	1.03688	3.0358	3.3399	2.24396	7.5645	7.25972	6.2651
ALDH2		0.0506364		2.48519	2.73346	3.3651	20.6577	23.1315	24.229				0.865378	0.674749	0.669105	44.049	40.5231	47.7823	20.4432	20.3839	16.0111		0.0584113	0.0203976		0.02433		6.83914	6.89836	5.39831	25.5347	26.2629	22.6789	0.198493	0.19737	4.42919e-82	8.57332	9.91842	8.8238	64.6233	68.2936	56.6336	7.19412	5.28487	6.2476	13.1292	13.7294	13.4947
ALDH3A2	128.316	103.956	94.3079	36.8592	31.235	27.7623	24.5408	22.059	25.1908	35.7387	32.645	33.216	43.417	43.2328	32.6184	33.881	36.4259	37.0428	17.0535	18.3682	16.0313	85.6212	90.2257	94.159	55.8215	52.9267	44.4705	25.3317	24.134	19.8926	22.332	26.3356	24.9303	19.2065	18.2313	23.4194	23.863	23.0282	27.4001	12.8712	11.727	12.5924	18.5174	11.477	13.1151	18.2495	22.112	18.9855
ALDH3B1	1.49882	1.94989	2.05503	1.33375	2.91614	2.43572	3.89415	5.39025	5.7744	5.77141	4.76406	4.54245	0.357054	0.619878	0.620227	0.324618	0.0916834		4.20522	3.56513	2.51778	21.1474	16.3335	13.8613	3.19271	2.83445	3.19981	6.96414	8.23575	9.79547	2.98218	2.46486	2.68108	1.1315	1.45497	0.855025	7.01803	4.62149	2.44028	4.4893	2.83622	2.58831	1.41093	0.842831	1.28607	2.69751	4.5286	4.35163
ALDH3B2	1.55265	3.02688	4.01514					0.723908	0.0177973	1.32321	0.987214	1.23348	4.97014	4.95286	5.01235	49.3283	37.6858	33.6379	2.7897	3.08696	1.77587	1.28955	0.484548	0.726244	1.02139	0.983483	0.7859	4.76619	3.4162	6.13556	0.0576641	0.154722	0.115353	3.63881	3.85185	1.86596				31.2979	13.0927	13.0177	1.07956	0.543831	1.11449	2.83493	4.3118	2.98332
ALDH4A1	1.85218	6.64781	7.19363	1.22523	4.57255	5.71066	1.95184	4.00138	2.77404	6.35735	5.17046	4.16794	6.41619	3.70597	4.23131	19.9557	13.8523	13.5986	3.19693	1.98221	0.839971	7.51656	4.08151	2.576	2.15982	1.54101	4.7735	2.23868	2.49581	4.402	10.2544	8.80989	10.0125	5.99957	6.37164	3.15857	2.63985	1.95446	0.610599	15.6011	6.89247	6.92527	0.264001	0.155054	0.830486	5.43463	10.9455	9.97683
ALDH5A1	4.72883	4.68822	4.48871	0.0265592	0.096927	0.108448	9.94611	8.28268	8.56465	4.79659	3.7399	3.51978	8.83905	8.47971	7.9612	2.74757	3.18803	4.22519	2.43769	2.68843	3.29081	6.43848	6.71513	8.32121	5.88901	4.53336	5.60168	2.67052	2.27227	2.97935	5.37189	5.16361	5.85873	12.0044	10.0496	10.5365	2.0423	1.52427	1.24391	0.279162	0.507209	0.510726	5.70092	3.99313	4.8055	3.72104	3.96325	3.90163
ALDH6A1	4.15563	3.86581	3.17564	6.51765	5.69035	4.19157	17.3713	15.8305	15.9668	10.2777	9.94668	10.3337	13.5549	19.6215	13.7583	8.57433	8.8699	10.7673	5.0478	5.61351	7.23982	12.8132	14.8469	10.7221	8.06463	8.44172	5.9099	9.29912	8.48069	6.7193	19.2622	20.3681	17.3558	17.4398	17.8803	15.8418	7.10852	8.53568	7.77983	9.46368	9.66222	9.32114	4.55803	2.32251	3.87755	43.739	40.5377	33.2703
ALDH7A1		0.0942188	0.298244	51.1588	31.4155	37.7992	107.32	91.4903	92.4112	22.5585	22.2498	29.134	52.6529	58.8649	42.4219	9.3889	9.98123	13.2864	73.1837	73.0499	72.9567	80.0671	83.765	88.9314	53.8994	75.0274	48.7941	71.6358	75.8474	69.8226	34.4501	42.5627	33.1944	22.4142	27.6424	22.2118	35.8557	41.3036	36.7835	20.2561	31.373	27.0724	24.2738	21.5628	26.4809	49.4296	48.0338	39.9
ALDH7A1P1			0.1837	20.6071	15.9669	15.6072	47.5878	41.9119	39.0032	11.4761	11.5853	11.4474	23.1983	25.1341	19.3731	3.5599	3.29079	4.90523	30.7968	31.0429	30.3247	38.0965	35.9619	39.3579	22.997	26.7165	21.003	32.9055	32.1969	29.3144	12.4184	15.1602	13.9299	8.85622	10.4612	8.04905	16.5056	18.3854	20.9148	9.77014	13.3506	10.1132	10.6252	9.19765	10.8809	23.6799	23.6444	18.0941
ALDH9A1	51.6089	44.9495	38.8645	24.1666	19.9167	18.1939	28.9336	27.7599	27.2699	41.814	37.2695	38.7609	19.3444	19.2511	17.0878	14.4674	13.5683	17.9143	40.9785	39.9254	35.9989	71.2105	68.7664	64.7128	43.7336	40.0476	32.5998	28.0443	28.0744	21.9245	25.5018	24.138	22.9641	11.7937	12.8332	13.0961	14.1835	19.5803	18.5281	13.8883	16.7167	15.521	13.2997	8.04429	10.038	66.5309	68.5097	54.1324
ALDOA	181.453	405.895	488.186	308.591	1095.91	1329.4	352.068	678.577	577.258	1111.47	808.342	611.259	446.686	333.642	324.128	2710.84	1578.91	1370.61	656.185	508.935	275.178	919.639	596.981	333.906	273.85	188.946	489.427	432.456	497.375	1196.97	1100.1	895.015	1302.69	1177.05	1122.49	734.685	696.725	279.287	102.338	1796.83	526.921	588.008	90.7001	74.2092	195.831	294.627	521.622	607.376
ALDOC	1.33688	2.46079	1.54613	10.4402	13.9483	9.32703	0.865526	0.328252	0.948494	30.7284	21.8425	22.7783	0.706387	0.540015	0.977811	2.93522	3.63646	3.05112	39.9942	54.4635	36.0395	4.27019	3.98755	2.23756	2.7998	2.08441	2.55463	1.06075	0.548906	0.398065	0.0436339	0.113401	0.235184	18.0047	15.0138	15.3266	0.823189	0.967286	0.838233	9.98339	14.709	13.7467	2.44599	1.14674	2.61494	49.9712	48.1474	36.0638
ALG1	10.6106	11.0772	8.1349	27.3252	24.7741	25.0738	8.30774	11.2602	7.71042	11.0597	11.2277	7.8907	6.23565	7.00241	5.45075	11.0418	12.1115	13.2809	13.383	18.0709	11.9973	22.3159	19.4562	17.697	14.79	11.5254	14.6293	21.6817	21.6728	18.8905	11.1824	12.064	11.2395	7.25374	11.6151	5.22683	25.9264	29.1364	25.1719	17.4795	14.7112	12.5874	7.76118	5.42636	7.50973	19.5016	22.098	20.6967
ALG10	12.0857	11.6632	12.57	5.04872	3.71747	5.49162	10.9239	7.39316	8.30786	6.49428	7.88758	10.0606	6.86284	7.04916	6.89624	7.84618	7.46576	5.22237	5.27658	4.64102	5.80706	9.34745	6.22384	9.17837	7.41794	9.3038	8.46109	5.55282	5.86947	6.44479	6.75556	6.93921	7.05931	9.64446	11.4024	12.6501	2.40395	2.28541	3.28222	3.86996	3.5738	3.87352	5.76454	5.59291	6.56115	16.7493	25.2234	20.9589
ALG10B	11.4463	14.8099	11.7568	2.15856	3.97775	2.35148	2.12909	3.44929	3.99023	7.5847	7.48743	5.09261	2.99857	4.47128	3.42226	6.01897	7.66065	6.53733	4.00646	3.0782	3.19376	5.47683	4.8162	4.09523	4.57395	5.98585	4.18462	1.75017	1.71901	1.7769	2.95124	4.96327	3.24131	5.60351	4.52893	4.73824	4.82504	3.16089	3.10906	2.22736	2.56289	1.88144	4.47545	4.47503	4.69539	18.8513	24.149	18.3359
ALG11	8.01458	8.90032	7.24936	4.74176	4.76903	3.84105	6.15674	6.71764	6.20795	4.02986	5.63741	6.47156	6.63457	8.10792	6.59275	4.29001	5.73216	4.00745	5.61265	4.73018	5.45466	1.72153	2.23167	2.19267	5.0935	6.10328	5.80367	8.19485	8.39587	7.51761	4.88796	3.61746	3.76815	4.01416	4.20989	4.24739	2.29793	2.38559	2.41548	4.04847	5.88635	5.90934	5.13505	4.01605	4.26348	4.08331	4.5237	3.99983
ALG12	0.938344	1.24813	1.87447	0.986348	3.19061	2.58834	6.17556	6.26201	4.80039	6.66187	4.32635	2.92423	2.57337	1.00951	1.50433	6.60176	4.18229	3.15693	8.22441	8.29465	3.30387	3.80744	2.04216	1.28814	0.390361	0.299798	1.14603	3.18448	4.14543	5.11468	8.24449	4.75074	7.83636	2.28496	1.83186	1.56852	2.51953	1.40016	0.414495	6.6221	3.11957	3.48875	0.294779	1.37962	0.983477	0.960893	1.97807	1.75342
ALG13	51.8568	50.4327	46.7887	36.7971	27.7641	29.5027	16.5924	14.2707	15.3247	7.15953	8.79151	10.8156	12.1292	12.3326	12.3463	14.1405	18.9734	14.6951	18.9166	17.1436	17.2771	13.4965	12.5775	12.71	23.0909	17.5811	17.4729	16.032	13.9306	11.7937	13.3649	13.0634	11.3491	28.3181	27.7927	26.7231	28.1197	25.4407	28.3864	13.6506	18.2199	12.3724	9.36954	8.65395	9.22143	13.4478	10.2772	8.43431
ALG14	4.3903	24.3672	3.27278	5.09283	1.90022	19.1002	1.88547	1.92489	2.60746	94.1747	5.96636	4.10891	4.17286	3.08782	4.2521	2.39121	0.533836	4.04299	2.46874	2.75893	5.65136	3.35306	8.06646	4.6285	2.69876	4.18699	49.411	5.31408	7.50554	5.38315	33.2906	1.80235	1.82004	1.57946	2.74489	0.292732	5.12842	6.40962	5.03029	2.73878	3.5176	3.37485	1.38053	0.6685	1.46355	3.6088	3.52902	1.75868
ALG1L15P	0.213583	0.755396	0.808906	1.02464	1.96458	2.15706	0.520559	0.351103	0.582834	0.29258	0.553094	0.900813	0.508663	0.142877	0.327964	0.136203	0.688288	1.09252	0.837092	0.548553	0.223481	1.74504	0.828747	1.15254	0.190213	0.721038	0.259028	0.904071	0.771093	0.438088	0.469846	0.530654	0.324392	0.626347	1.15834	0.858481	2.45019	1.05645	0.546085	0.79243	0.537868	0.648234	0.416819	0.0654317	0.204286	0.461361	1.70183	1.87178
ALG2	51.048	38.8411	33.8741	33.4479	24.5652	26.5973	15.7845	13.3083	12.7643	22.4139	21.9986	27.6979	19.7715	20.4098	19.0702	14.8073	12.2279	13.6808	13.3664	16.3709	14.3992	43.5243	43.3709	42.7547	45.7957	45.9005	33.8285	39.9617	41.7132	32.6635	14.6779	15.4828	12.9578	14.8604	16.0149	16.2961	37.4303	46.9875	48.3359	24.6825	31.8883	26.1071	26.0564	23.4329	20.9628	14.2394	13.6349	9.98224
ALG3	18.4622	24.2363	21.7824	18.2221	29.3345	29.4347	17.3162	21.9544	16.4505	18.9859	18.2258	17.007	9.14246	8.46023	8.96652	20.9689	19.1944	20.5701	30.8609	26.0043	22.8311	43.3629	30.364	23.9007	22.2293	14.1929	22.2239	15.4735	18.3589	17.5044	30.316	29.6969	31.3197	13.714	14.1343	10.6019	18.0397	17.1333	12.1201	38.9789	30.2385	28.3886	18.7765	17.9281	22.1956	36.2176	43.7086	38.9233
ALG5	38.0152	33.4765	26.1301	69.2412	58.1103	54.3812	22.9057	29.0194	27.7691	23.7159	23.313	26.2945	26.7178	28.1104	22.895	10.4833	11.4529	13.2537	20.9169	18.4359	16.0662	38.2606	37.5097	43.0728	36.0479	31.5519	26.6737	26.1378	25.328	22.448	24.6197	19.8125	19.7935	20.9178	25.511	22.2308	12.7012	13.6079	17.886	15.8059	18.4531	17.3121	23.483	20.1034	20.533	40.8334	40.1407	29.4166
ALG6	6.4556	6.55101	6.02835	10.5141	8.83293	8.48964	14.0381	14.3414	13.1995	9.71841	10.4453	10.3491	16.7284	14.5736	14.5608	9.31317	9.31326	10.8787	5.95109	5.37459	5.18061	8.67397	8.14866	8.9498	8.42932	7.82536	7.03806	9.3271	7.95783	7.98441	11.8655	15.5145	14.2269	6.94309	6.05649	5.51043	7.16495	8.41696	7.91367	11.0627	13.0097	11.9467	7.0819	5.38107	6.58519	10.7254	10.3146	7.06818
ALG8	40.5044	32.9376	31.793	69.3754	49.1051	51.4572	34.5244	37.8805	33.8641	13.7578	12.5958	16.1953	20.637	19.7306	24.8499	5.91376	8.55013	6.80617	48.9736	48.6478	39.164	40.1982	38.1724	43.5156	45.6944	45.7047	37.387	32.4943	27.8222	23.7461	18.1508	17.3405	15.0467	25.2908	24.9074	26.4799	38.5456	44.6152	43.5447	27.479	40.2699	33.9025	45.3372	34.4796	32.5405	73.3216	69.1022	54.9678
ALG9	1.43056e-16	0.401834	7.1252e-17	5.8083e-20	3.3678e-07	0.0303231	5.54515e-07	7.5199e-10	0.000817095	5.0719e-38	5.2877e-37	0.122414	0.178527	2.01229e-25	0.083369	4.56349e-20	5.22685e-18	5.29555e-07	1.30135e-23	1.98188e-46	0.431928	3.51253e-13	4.64501e-18	3.31961e-05	0.194903	0.134058	0.099067	6.76335e-21	1.25019e-20	0.100472	0.210455	1.30789e-05	1.06824e-10	2.42434e-06	0.195297	6.25085e-19	0.000438581	1.97184e-10	1.91881e-11	2.15202e-18	0.452889	1.81457e-95	0.0545965	1.22679e-24	0.0809055	0.000149773	0.00248892	0.000203884
ALKBH1	9.3183	5.65908	6.32895	8.61048	9.69646	7.15478	6.31052	5.98477	5.28471	6.93884	6.67042	7.81964	6.07783	5.48587	5.07111	3.30934	3.87465	4.98227	3.63313	4.1094	5.83603	9.16238	7.67501	10.0802	7.71439	5.33936	4.52951	5.84181	4.30948	5.31647	4.41917	4.2305	4.187	6.25035	8.52358	6.847	11.3033	12.3959	12.4214	3.66492	3.66068	4.12842	2.99076	2.11528	2.7717	12.9803	11.8226	7.44823
ALKBH2	7.21659	9.84918	8.18817	11.5071	15.9662	11.7077	21.216	20.0859	17.0956	20.8376	15.4138	18.1457	4.07561	4.44593	3.19096	6.16112	5.18094	4.4098	16.4214	17.8069	12.5751	11.3584	8.90434	6.73409	9.22647	6.93512	10.2042	8.99399	6.5846	10.7732	10.552	7.95736	7.73433	10.6343	10.9407	8.154	14.7976	11.5101	6.64012	15.5088	10.5981	8.6463	3.60009	2.77512	5.07982	17.3004	23.084	20.931
ALKBH3	39.008	28.5779	29.813	18.0133	12.0675	13.0169				15.8678	10.7084	14.5352	18.8008	22.5626	17.9915	14.236	15.6696	17.3286				33.1143	27.0284	28.0743	19.6922	18.0057	14.1044	12.6543	10.3231	12.562	2.33762	3.69442	3.09871	3.81874	4.93083	5.34623	18.2964	25.3119	22.1975	10.4092	11.2645	10.143	35.981	23.6788	23.9835	34.6174	26.3158	27.8051
ALKBH4	1.59324	1.77656	2.50279	2.02356	2.79822	2.67399	2.16554	3.37781	2.9312	2.70614	2.43903	1.92973	6.56905	5.42067	4.37618	2.99151	2.37425	2.06915	5.21839	4.59345	3.01376	2.60872	1.83633	1.55556	1.87921	1.41726	2.98159	1.41441	1.28718	2.34679	3.07628	3.62457	3.32434	3.6807	3.61048	3.56415	4.58229	3.29904	2.04208	5.43604	3.63246	2.70853	1.27791	0.576779	1.5773	2.9167	2.55595	2.0689
ALKBH5	22.3347	29.7775	30.4727	43.0919	53.1206	56.427	24.6576	31.7596	27.9148	43.5877	34.3634	38.3418	24.6813	25.8311	22.3507	72.3367	65.1289	64.4111	25.3021	20.8733	17.7897	41.2175	33.3433	24.2448	30.4063	28.8397	31.6208	20.6675	20.4738	23.7762	24.557	22.4987	21.316	21.9295	23.0651	22.6853	42.9174	40.7454	33.2965	23.3619	19.4906	20.823	10.1085	7.99761	11.9523	15.2815	18.6739	16.0936
ALKBH6	9.35048	8.75448	9.16216	4.91434	6.06895	5.59264	1.83399	3.83316	3.67266	12.7435	11.5945	8.91271	6.92344	3.08452	4.70438	9.33607	5.7091	8.56511	3.00359	4.77569	3.33404	5.61435	11.9497	4.47198	6.49215	2.4845	7.47516	6.70159	6.78281	7.86053	9.14579	9.93593	7.31757	7.07521	8.68145	4.94428	11.6824	11.2001	6.30849	6.96124	6.0655	5.65041	4.13859	1.7532	4.40838	4.74662	5.18845	6.79333
ALKBH7	1.06888	2.65317	3.00412	0.951729	8.50909	12.2779	6.5754	9.57695	9.81669	17.9967	11.1868	9.53454	25.3664	16.6908	15.7755	11.2824	6.71832	6.04204	6.96857	8.05528	2.43104	7.25615	2.62809	0.741487	0.582043	0.312655	3.4872	1.84737	1.71164	6.06332	4.87552	3.45199	7.90214	8.98346	10.3703	4.91173	32.7278	11.3512	2.77678	3.95755	1.08504	1.15004	0.4963	0.348157	0.719565	4.11083	7.98585	10.8928
ALKBH8	8.28405	8.5067	6.92459	4.85078	3.37161	2.91564	4.1793	5.61093	4.60042	4.44282	3.88712	5.29757	3.37378	3.70086	4.28718	1.20197	1.96485	1.59701	6.63982	5.82002	5.62055	4.60989	3.22688	5.48474	3.9528	4.97712	3.44806	5.36957	5.07834	3.60211	2.63431	3.22265	1.56877	1.61484	0.945161	0.942183	2.20208	1.91785	1.30234	1.61201	3.28309	2.593	2.21381	1.6752	2.18922	4.06676	3.9551	2.89655
ALMS1	15.8322	14.5149	11.764	6.83075	5.79799	4.82258	10.6458	8.04381	8.24655	15.0831	15.0502	15.575	8.49156	8.52847	8.0857	9.33644	10.4063	10.6349	10.7247	10.7969	11.0559	7.18358	8.01122	8.66372	7.83504	7.99682	5.78273	9.60367	8.29438	8.3758	7.1576	8.67173	7.03795	11.7275	10.0178	11.8684	20.0135	13.0726	13.8583	2.93717	3.52475	3.43371	13.3794	13.6795	14.1044	3.46768	2.93145	2.40659
ALMS1-IT1	1.77053	1.57893	1.91958	0.451185	0.147472	0.349661	0.671332	0.203432	0.406079	1.38226	1.38121	1.84001	0.528097	0.65062	0.478897	0.376369	0.302756	0.401297	1.58737	1.14242	1.2086	2.71751	2.20559	2.38754	0.884431	0.621537	0.62031	1.09138	1.27967	1.78508	0.86526	0.770294	0.994037	1.01929	1.12386	1.05446	0.746537	0.388784	0.415894	0.292857	0.644869	0.422752	2.63412	2.20861	3.13381	0.443019	0.301411	0.43254
ALPK1	1.50458	2.52584	1.07965	1.55636	1.5057	0.63581	2.65148	4.57227	3.5773	3.14199	4.46349	5.07801	2.73502	3.78661	2.59757	1.87129	1.12734	1.97691	15.2529	11.1622	11.2092	13.3446	15.9936	17.5067	8.68853	7.27424	6.63829	4.36858	4.2273	4.65679	13.7845	14.1215	12.4655	6.03226	3.84276	5.31836	4.57784	5.28221	5.34513	5.11657	5.58507	5.61838	3.07621	6.96151	5.17862	7.24505	8.73967	10.5032
ALPK3	0.363921	0.326302	0.987184	0.150845	0.0328774	0.064275	0.0354473	0.0282253	0.0409478	0.351521	0.425569	0.085306	6.94765	6.39546	7.02031	0.435365	0.231992	0.153857	0.0263345	0.0453245	0.0076693	3.12653	1.45095	1.25384	0.26845	1.70617	0.466348	0.302429	0.127756	0.172554	0.538308	0.0501334	0.0733592	0.208562	0.136511	0.16189	0.025887	0.0190583		2.4545	0.390372	0.565378	1.14041	0.796855	0.215503	0.033505	0.0563211	0.0251685
ALS2	24.475	19.4358	18.7246	11.7562	8.51236	6.67647	12.5511	11.2664	11.6069	16.4972	14.2588	12.9461	7.96889	7.70398	7.23544	7.28198	6.43757	8.96188	7.31068	7.36997	8.14688	10.3818	10.8374	10.4206	6.21868	5.23201	3.44983	14.8769	15.4871	11.2552	5.244	4.74566	3.56307	6.50053	6.64705	6.28576	9.79666	11.2461	11.6223	7.21457	7.51598	7.62213	5.88206	5.78292	5.07242	6.345	5.40845	4.7221
ALS2CL	1.02505	1.75729	1.34311		0.0482999	0.0671852	1.36605	1.65325	0.916612	1.51175	1.76638	1.11501	0.45173	0.20121	0.303915	0.49465	0.369196	0.21625	0.341094	0.374908	0.102708	9.75998	4.54834	4.2557	1.36232	1.05047	1.94875	0.874996	0.980907	1.43458	1.24273	1.67797	1.66938	0.933761	0.656231	0.336785	0.0932762	0.0360467	0.0351059	4.46146	3.2027	1.30185	0.938973	0.838861	1.14608	0.978559	0.867449	0.679187
ALS2CR12	0.822185	0.256311	0.384071	0.132845	0.252771	0.707197	0.958995	0.697346	0.272082	0.68818	0.96875	1.0151	0.57818		0.102465	0.271465	0.164214	0.405923	0.650163	0.792352		0.0749309	0.96338	0.158745	0.176112	0.738044	0.186101	0.374815	0.728156	0.258705	0.163769			0.77273	0.562241	0.0568698	0.640154	0.60895	0.624044	0.083366	0.235118	0.194279	0.0495622			0.448213	0.315015
ALYREF	23.1916	43.2121	52.6491	20.5557	44.9342	51.9293	70.7311	106.833	81.9037	116.749	92.02	76.4643	61.1783	45.1642	41.5324	56.7484	40.2782	43.8645	55.9341	49.523	28.4356	76.7523	55.3937	28.1868	29.6744	29.6111	57.0572	40.8899	39.2256	62.6394	36.4008	32.7951	35.5399	50.602	42.7564	34.7728	203.004	147.728	62.5588	57.3692	27.7807	26.7964	33.9232	36.8253	62.8412	33.0092	54.5101	52.1158
AMACR	23.9629	18.1976	18.7475	7.8041	7.29266	7.15161	10.7146	12.8418	10.2054	5.10375	5.99931	5.49741	4.02731	4.55305	4.61848	12.6132	10.3313	15.8096	5.73277	4.53664	6.05011	13.5193	12.8002	13.3904	10.5792	13.609	9.83465	8.20713	8.31915	7.22432	7.33666	7.3768	6.45533	3.12487	3.98032	4.14568	7.77697	11.7744	10.6939	5.61119	5.8619	5.48081	2.12799	1.31886	2.14469	5.93211	6.7898	5.12817
AMBRA1	9.51513	9.98632	9.10546	21.3512	16.8255	11.7661	15.3184	12.4539	10.9924	9.23029	9.58252	8.70152	19.7941	25.5326	18.2341	8.87713	9.31856	12.1932	8.64655	9.80484	10.3961	23.3458	13.2055	16.8064	10.7996	7.63423	8.05853	22.403	24.3249	21.7798	11.5824	14.6344	11.1299	14.2782	14.558	11.8014	8.13629	9.86214	6.67154	10.028	11.8435	8.18562	12.8883	14.0909	14.2631	11.165	9.40231	7.61065
AMD1	138.761	110.953	106.045	90.7868	66.7395	62.9629	111.393	109.244	102.311	59.7745	57.4275	63.7168	64.7531	71.5385	66.3167	31.2631	31.2519	31.3941	103.101	96.9869	97.2411	80.2016	79.647	86.1125	107.046	109.844	84.5897	68.8241	64.6986	57.5361	42.5179	42.7129	35.0914	21.5439	23.3257	28.4536	48.9151	61.4985	62.9862	28.4066	36.0792	36.3337	61.0316	47.5656	53.4199	45.2683	40.889	34.9441
AMDHD2	0.263649	1.24433	0.712356	0.541328	5.8887	5.40038	1.29492	2.88656	1.31787	1.78001	2.75794	0.856455	1.67322	1.76564	1.83382	4.93567	4.22129	2.41322	1.48377	1.0891	1.11029	1.52349	1.30593	0.196241	0.605549	0.316515	2.21364	0.440749	0.56288	2.23206	2.47922	1.51234	2.92233	5.19523	3.91183	2.52128	2.75195	1.00647	0.230872	6.54854	0.849942	1.04036	0.373613	0.443848	1.36733	1.98338	6.30696	4.73876
AMER1	1.76359	2.18778	1.99738	1.3711	1.67619	0.965968	3.70893	4.21008	3.05465	2.3726	2.06219	1.43606	14.7104	15.5142	13.7765	0.955977	1.23362	1.01815	3.21722	3.20862	3.33539	1.94835	1.8794	1.58141	2.36664	2.41123	2.59604	2.96433	2.39446	2.23664	2.71192	2.80238	2.95946	1.50942	1.97074	1.36389	1.69826	2.15585	1.00688	2.89369	2.46996	2.48979	2.27234	1.48023	1.62271	0.659429	0.82624	0.86276
AMFR	59.6064	65.5124	61.7722	54.4272	59.7951	63.207	29.2593	35.8969	38.7706	49.5631	38.6246	34.3092	22.7019	21.8412	20.9005	35.2823	31.1617	29.4392	18.8652	16.7583	14.3619	82.1957	74.9943	65.3216	69.0082	60.2766	68.7689	58.8226	59.9067	62.8926	99.013	89.88	87.1912	53.3606	57.8091	45.9671	36.2065	35.8261	29.9089	20.2233	15.8502	13.7077	16.4468	15.4819	16.1301	67.1746	70.2426	69.0129
AMIGO1	1.67441	1.60253	1.49139	0.706658	0.699273	0.568199	1.61023	1.38956	1.57146		0.0753719	0.0403198	0.0792227	0.139433	0.201679	0.650463	0.364549	0.847847	2.65907	2.4147	1.92652	1.55789	1.36093	1.26673	0.77734	0.751792	0.511082	0.858326	0.89643	0.989139	1.49364	1.23909	0.800991	1.44812	1.71249	1.01349	1.14563	1.76696	1.25121	2.71437	2.29065	2.92216	1.53047	1.23647	1.41415	1.10833	1.21602	0.925817
AMIGO2	4.45539	4.42486	4.89715	14.5664	12.7721	12.4925	18.4885	19.2974	18.8468	4.33463	4.09147	3.37156	15.1128	14.5808	13.4067	7.14863	6.32526	6.93748	0.256156	0.413765	0.082328	23.4855	19.8543	22.608	16.2562	14.1527	14.2422	12.5521	14.1868	13.5055	4.96604	5.78628	4.27615	173.464	187.082	173.289	20.1674	23.2185	21.6753	7.30505	6.15247	6.14031	54.9395	49.2463	54.1063	3.09175	3.10567	2.7276
AMIGO3	0.224172	0.33712	0.525816	0.239557	0.44581	0.675425	0.701122	1.39209	1.0126	0.783317	0.569537	0.520252	0.00844615	0.502903	0.320511	3.13968	2.35448	2.21719	0.405846	0.369192	0.209543	0.974063	0.323491	0.291359	0.497831	0.356175	0.764759	0.232048	0.53061	0.894531	0.556636	0.533092	0.71588	0.396557	0.456801	0.242433	0.530611	0.168648	0.0883436	0.840625	0.269175	0.226776	0.0947918	0.0814054	0.261437	0.195888	0.384594	0.527907
AMMECR1	31.3726	27.5465	23.7955	36.3291	26.4701	31.4494	7.06413	6.30871	7.20575	5.23097	5.65072	5.41811	4.83563	5.44251	5.45719	4.87662	4.78895	4.49843	5.67826	6.56084	5.55359	19.9291	19.0056	20.5171	19.1577	19.0698	16.8768	13.8634	11.7122	10.1753	16.6953	16.8592	16.2535	10.3887	8.85987	10.1366	5.68853	6.07764	5.54121	7.38734	9.68279	9.00464	6.47459	5.5081	7.75473	4.44276	4.20573	5.01231
AMMECR1L	17.121	14.8925	12.2027	6.69805	5.3192	4.55729	6.48677	8.0432	6.87226	9.86364	9.06859	8.85069	9.31797	8.05151	7.75154	3.69894	3.87833	3.97484	8.71312	9.19004	8.32708	12.0503	11.4573	10.6627	13.7688	11.0267	10.5724	8.35252	8.42679	6.79525	6.43177	6.07149	5.31446	6.36752	6.65402	5.87262	9.47084	10.6034	10.8213	6.47237	7.62538	7.40311	7.19702	5.81191	5.83669	5.05248	5.00522	5.02063
AMN1	2.20196	0.952288	3.30065	5.40011	3.47724	3.91223	7.94867	9.18956	6.67384	4.02225	3.30314	5.35562	2.41678	1.68955	1.39957	1.85252	1.79312	1.76408	7.55449	7.22954	6.1221	6.51173	8.70565	9.36419	2.83366	1.47843	1.90264	3.86455	5.31819	3.37974	7.19967	5.0738	4.18477	2.82303	4.20606	3.19685	1.69574	1.54944	2.27082	1.0132	0.346655	0.308528	5.02339	3.53347	3.74029	9.44601	7.56958	6.93067
AMOT	4.00629	4.4246	5.50362	0.242434	0.229965	0.278988	2.87329	3.42045	3.46806	8.16774	10.4413	8.11304	12.1435	13.251	9.93597	0.946695	0.695967	0.738326	5.52782	5.42641	4.89809	0.0725268	0.12597	0.0916882	6.44116	5.09408	4.66992	2.75257	2.66814	3.20397	25.6535	28.8225	31.8943	3.15213	3.21816	2.2934	6.8295	6.88884	4.69518	0.315332	0.293984	0.760514	0.729828	0.56466	0.438626	0.499058	0.368337	0.522071
AMOTL1	19.8503	19.2899	19.0795	11.2826	10.6616	8.6956	5.96508	6.06613	5.59546	7.17713	6.23544	6.23977	26.915	27.9694	26.07	6.25891	5.65637	6.03485	2.18495	2.94492	2.01217	23.6216	23.0526	23.605	43.6935	41.5981	36.4677	7.58151	7.34114	6.54818	6.41068	7.08692	6.75745	5.13166	4.80179	5.12512	6.26611	6.32885	5.92425	23.0936	22.1919	21.0397	6.50705	6.59022	7.6519	1.68265	1.9263	1.43147
AMOTL2	35.7272	41.6797	36.8543	29.9757	34.4249	34.8133	23.2876	23.1121	28.0832	21.4122	20.5685	18.629	13.225	11.6598	10.8454	16.5017	10.0165	10.4563	28.462	29.1126	21.9783	25.3644	19.9572	18.0889	19.1823	16.0394	19.7262	22.5675	22.5255	22.6818	17.5556	17.9001	18.5706	27.2981	22.755	18.4893	21.5109	19.9109	15.3255	39.534	25.2038	25.1858	22.0151	17.7513	23.7736	18.8962	19.9926	17.436
AMPD2	10.1732	20.536	22.0201	8.21692	19.6574	16.3673	9.55093	14.1054	9.22904	6.81564	5.13442	4.35287	3.718	4.8381	2.36242	1.6567	2.09339	1.58036	7.72591	7.77207	5.09636	9.70557	6.00361	3.96784	5.60216	4.45545	5.26181	12.1035	10.5469	14.8177	19.0595	16.9699	17.5225	5.73727	3.83162	5.0469	14.0601	11.0286	3.42531	7.42768	3.40517	3.10652	3.80906	3.87714	5.20277	5.24265	4.78597	3.96788
AMPD3	1.17362	1.38063	0.931627	0.50137	0.247264	0.685416	1.20053	0.345052	0.057868	0.845609	1.17846	0.586856	2.39853	1.80885	1.42199	0.97058	0.863671	0.49839	0.437066	0.32072	0.472922	1.61503	1.43778	1.60353	0.688721	0.770668	0.815989	0.671689	0.991105	0.63097	0.71196	0.8314	0.890173	0.552684	0.718717	0.204404	0.310333	0.633027	0.763639	0.0565309	0.631299	0.0209761	1.07222	0.938073	0.976327	0.98239	0.138839	0.0307472
AMT		0.0109781		0.509902	0.518978	0.562879	0.877949	0.465209	0.0131363	0.333825	0.115009	1.00473	1.62519	0.510871	0.203862	0.262722	1.35145	0.639238	0.0653799	0.161842		0.559084	0.284608	0.0983935	0.519579	0.0105768	0.108466	0.0626935	0.235855	1.17279	0.129971	0.399842	0.637391	0.894427	0.660364	0.232165	0.295264	0.0642345	0.123621	0.0906139		0.0455503	0.669072	0.913428	0.143493	2.63833	0.839516	1.53135
AMY2B	0.00818055	0.0673908	4.35537e-09	0.348207	0.676138	0.231124	0.831479	1.00733	0.452737	0.58177	0.508158	0.502786	0.0473595	0.26679	0.0743358	1.21879	0.899955	1.0532	0.0863254	0.241969	0.147943	0.297956	0.00769271	0.0909293	0.295857	0.112124	2.31224e-07	0.299045	0.442342	0.0237696	0.120985	0.0704667	0.0291975	0.0239512	0.0560412	0.017565	0.0154761	0.0152366	0.185499	0.126186	0.0841477	0.26032	1.21824	0.224454	0.796664	5.1395e-19	0.0464994	2.65266e-06
AMZ2	24.8647	18.8431	21.396	21.0797	17.4399	13.988	21.9885	20.6849	26.3828	29.6655	27.57	33.6465	10.4526	9.99855	9.13825	8.6458	11.3249	10.3839	21.6249	19.5591	19.5558	73.603	83.575	81.7185	34.294	29.8759	28.1336	37.3257	33.8608	29.8585	15.2856	15.2079	12.3589	23.3643	27.2218	29.7253	53.606	65.4955	74.123	14.2255	20.9191	16.6967	13.4898	10.8063	10.3199	24.8922	26.3853	23.9326
AMZ2P1	1.37902	0.530676	0.704486	1.71414	1.10656	1.09223	2.02478	3.55235	3.75914	0.541663	1.31117	0.755495	0.253775	0.408939	0.0663929	1.56442	1.04247	2.35697	3.00063	2.06909	2.54128	1.67492	2.5127	2.01941	0.608192	1.06618	0.656271	1.08558	1.03757	1.13354	1.09936	1.15599	1.32692	4.15146	3.11896	3.83307	3.82154	4.86584	2.22087	0.309834	0.324712	0.254012	0.547515	0.67446	1.08722	1.89413	2.59349	1.91496
ANAPC1	26.3049	25.7098	22.2622	13.0896	10.3107	9.06288	26.6347	20.4754	21.075	14.344	15.4445	15.3947	12.7891	14.2113	11.0146	8.97926	11.5721	8.49278	15.2913	15.2995	16.7014	20.4882	21.271	27.9711	25.7988	25.9245	15.9303	21.2395	18.5398	16.6154	13.5637	12.5625	10.0611	13.9137	13.3725	11.1785	12.3078	15.86	13.857	10.2174	13.4153	11.9326	16.7877	13.2486	13.2759	11.8659	10.1082	12.1359
ANAPC10	21.2744	15.2951	15.3211	17.4794	11.1958	13.4045	21.337	18.9837	16.2745	10.7795	9.75858	12.7856	10.3443	13.9007	10.389	10.9928	11.5397	19.1605	16.952	13.2432	20.3732	51.426	60.0241	57.0033	18.0878	20.0954	17.882	20.4164	20.3064	17.0529	15.3079	18.625	10.898	8.86688	9.25576	12.1297	14.1792	16.5578	21.0916	6.39486	9.43818	11.2218	9.28928	6.75189	5.59341	16.1415	13.3665	16.1755
ANAPC10P1	0.801666	0.461421	0.44558	0.713803	0.131011	0.826574	2.25263	1.64284	1.16375	0.40019	0.497869		0.651328	0.632959	0.438718	0.976118	1.5889	1.33053	1.59935	0.733089	0.131408	1.99044	2.17104	0.988664	1.74616	0.87299	1.62736	1.03915	1.2566	0.129007	0.726142	0.714438	0.229175		0.481536	0.757668	0.813117	1.35721	0.858251	1.93987	0.241123	1.66118	0.744466	1.97289	0.241906	0.352357	0.6981	0.286728
ANAPC11	3.08858	17.5419	21.2667	4.38837	32.3851	40.3974	28.7212	79.4162	53.7747	119.053	65.2991	60.5912	51.4473	30.3267	34.2585	23.7292	14.7461	13.8363	18.8293	9.24176	7.64325	23.7731	14.9815	7.91367	8.40826	6.16898	25.5811	11.3339	16.8025	54.9908	50.4289	36.7688	55.8288	66.0701	74.9743	37.6113	107.237	29.4147	12.4493	30.1609	5.00528	9.1642	4.89996	4.4355	21.8136	30.7108	68.7914	110.217
ANAPC13	56.2548	46.5597	42.2394	47.933	34.9546	35.8926	29.6149	32.7127	32.0369	29.1614	32.0279	34.0968	9.60064	10.8258	11.7202	22.1861	25.375	25.5866	45.7995	39.6825	35.1961	23.0943	19.8647	23.6073	18.286	21.1084	15.0944	36.9942	36.904	28.5741	35.0089	31.7526	32.5557	25.0836	27.1826	25.9473	28.8982	34.2819	28.5814	8.68958	12.8283	7.92825	14.4327	9.02624	10.4431	43.9744	44.9094	41.2154
ANAPC15	30.964	41.7309	28.897	29.6353	31.0879	36.0189	75.1585	74.5824	60.9652	14.9715	15.7292	17.0567	14.142	18.2198	19.563	21.8405	25.2051	33.6904	35.5712	38.0811	29.1392	48.0905	38.9174	38.9959	49.3334	49.4454	57.4327	23.8152	28.2955	20.5412	22.1991	18.079	17.4444	21.2621	27.0368	21.4207	44.7166	44.2878	36.7661	19.3416	22.4086	19.7574	18.6636	13.9887	27.4768	46.1467	39.516	45.5157
ANAPC16	63.3974	52.9089	47.0114	48.0152	41.5882	34.9219	65.6826	53.0587	60.0951	40.2318	46.3893	51.8121	44.686	51.335	46.0442	17.5213	19.7204	22.6947	61.535	58.2448	54.3258	57.1818	62.6425	56.9596	41.7529	32.5226	27.1312	40.6802	48.1109	39.1298	55.9458	56.7626	44.6145	30.4824	34.5967	25.7852	23.5266	26.5244	26.0919	26.804	33.6822	31.8087	32.1346	21.6737	28.351	29.554	27.2091	24.0773
ANAPC1P1	0.411594	0.279197	0.373041	0.0570428	0.123596	0.0949791	0.118508	0.22875	0.350078	0.139919	0.0897082	0.279884	0.089506	0.153931	0.28878	0.0516521	0.0947402	0.0654055	0.0646786	0.137191	0.378223	0.257814	0.274869	0.0664217	0.141167	0.0647071	0.104153	0.137999	0.285237	0.347035	0.19885	0.0376598	0.0342729	0.0652584	0.147196	0.120307	0.122266	0.0814362	0.293699	0.126133	0.143309	0.258381	0.0297203	0.112685	0.107356	0.175796	0.0826657	0.117501
ANAPC2	1.55772	4.0223	4.17509	0.493679	2.749	2.97375	2.97698	5.01468	3.67375	5.14142	4.26344	3.33051	6.22272	4.2194	4.41502	15.9756	10.3258	7.77337	2.35641	1.83992	1.08434	2.57453	1.36171	0.839403	0.988669	1.14879	2.56433	1.74543	1.66841	2.71603	3.34399	3.05717	4.46908	7.48859	6.03203	3.02636	3.69497	1.73216	0.622978	8.06368	2.80345	2.84653	0.615387	0.664113	1.84403	1.94163	3.57	3.43801
ANAPC4	10.4424	9.90665	10.6186	13.8206	10.1726	9.21646	13.5962	10.1582	13.8088	8.21471	8.58615	9.67821	12.5497	9.92719	12.4597	6.37869	7.43486	5.75113	8.12361	7.42752	7.82317	17.606	15.2415	18.863	8.32154	9.57192	10.987	10.0037	8.75412	9.15627	7.75667	10.2712	7.44925	10.116	7.02161	8.51925	11.1107	9.85261	10.6204	3.29588	4.48391	4.5777	11.0098	10.7938	10.0043	10.5619	9.23884	6.04529
ANAPC5	42.7689	35.6825	35.382	49.4612	42.6321	39.2126	57.9885	50.844	46.5202	54.24	57.18	64.4735	26.3892	26.7023	28.8267	23.0772	25.8632	26.9901	34.8023	37.1454	36.0077	22.9768	24.7145	24.645	29.0089	31.1612	17.8149	35.5292	33.841	31.9473	32.537	36.0275	33.9824	38.3272	41.1435	37.4661	27.4811	27.0318	30.6285	11.8025	14.3728	12.7015	27.586	24.1985	23.1805	45.4629	51.3305	39.8856
ANAPC7	34.1085	25.0374	24.9882	32.2093	24.0224	23.806	25.757	23.0048	23.643	29.3665	28.2674	30.7043	24.3937	22.4767	18.8413	28.6273	28.4248	27.3599	23.8923	26.0725	21.9331	39.0413	31.5878	39.2358	24.0447	23.6259	17.9142	27.6519	25.2702	31.088	15.2296	11.3837	12.5636	18.1606	21.2592	19.6498	19.6473	19.8271	20.0494	21.1169	22.4864	24.5131	18.4802	13.5639	16.4538	32.348	37.381	29.8687
ANG	0.811915	1.3138	0.424013	4.64415	3.81017	3.83555	0.505307	0.340833	0.161074	3.49421	1.24052	3.34809	0.368461	0.859964	0.397886	1.66406	0.835192	0.574016	2.86806	3.98211	2.9593	2.12331	2.97132	2.42297	3.2337	2.28845	1.5889	0.37895	0.88514	0.484573	3.86887	4.24029	4.22842	0.0348794	0.595413	0.132104	0.571174	1.19042	0.482115	1.21827	1.42083	0.564983	1.57186	0.939373	0.343131	1.61905	0.707347	1.16677
ANGEL1	4.90165	3.41373	3.00226	2.77398	2.77424	2.14643	5.698	6.14856	6.07954	4.89122	4.03727	4.20112	3.349	2.74671	2.53374	5.01877	4.0461	4.07733	3.54737	3.85443	5.0119	6.06839	4.88244	4.15169	4.39655	4.77905	2.68479	6.94253	6.9977	7.30942	6.54249	5.523	5.4478	11.5458	11.7281	9.51404	3.75716	4.26351	2.08282	3.18641	3.12425	3.44158	2.00927	2.41068	2.45037	10.8896	11.0707	8.5149
ANGEL2	14.8641	15.1628	12.1322	17.3708	11.9826	14.6816	18.253	16.469	14.2263	29.0496	25.5772	27.2336	16.6099	15.5737	16.4645	9.74833	8.91738	8.39804	24.425	21.7855	20.3207	12.9507	11.9085	11.6382	16.2511	12.2237	14.2813	11.2007	10.7641	10.9111	12.1527	8.79159	12.3732	7.56892	7.31424	9.21495	19.9656	19.6059	25.423	13.3838	13.9104	14.1355	15.7503	12.356	14.2885	22.4145	22.5125	16.2019
ANGPTL4	0.0492411	0.601376	0.398159	0.742277	4.74376	4.47344	0.276705	0.881433	1.01568	0.145996			0.238782		0.133665	0.478981	0.207516	0.126779	1.52715	1.27244	1.7514	1.25951	0.760961	0.889994	0.641649	0.0218683	0.264737	7.62769	7.6375	17.1467	1.07465	0.265118	0.613026	0.871871	0.837909	0.460557	0.998169	0.309678		3.35114	0.779731	1.2915			0.168663	1.233	2.66618	2.6721
ANK1	0.0768408	0.359072	0.0704586	5.39481	7.76628	8.79749	13.4058	19.729	12.5468	1.70128	1.65401	1.4059	0.451043	0.330247	0.820998	0.272443	0.135951	0.00608459	0.0553811	0.0121441		0.672791	0.815433	0.611364	0.570642	0.505106	0.602999	0.48029	0.415592	0.799274	0.0458437	0.011646	0.197326	0.361834	0.469936	0.212777	3.06167	2.51332	1.53868	0.290742	0.136416	0.304805	0.274506	0.393417	0.405986	1.10807	1.31135	2.75889
ANK2	0.0406842	0.0527776	0.107484	0.745395	0.814986	0.45094	3.28715	2.8453	4.79199	0.362554	1.10522	0.133462	0.784462	1.59667	2.20097	0.0224329	0.0456197	0.358211	0.435908	0.25629	0.136795	0.0419341	0.0101444		0.117213	0.124397	0.0423609	1.02057	1.84505	1.64238	0.374026		0.0233418	0.0645958	0.0467894		4.79066	4.00159	2.66822	0.0157853	0.0257744	0.193902	1.36558	0.698925	0.397122	1.63546	1.36278	1.88071
ANK3	9.62005	8.01098	7.14455	0.0835599	0.156107	0.468902	11.5992	12.1432	10.9202	5.84454	6.4713	9.00028	19.5966	20.1507	17.8567	41.201	42.1937	45.3977	30.2417	32.523	35.6144	4.65234	6.22466	6.37815	12.1782	13.7869	10.6008	67.29	62.6354	59.2778	11.1673	11.6287	12.4911	28.1652	22.3565	21.8681	1.14996	0.928783	1.46192	23.8472	25.3611	25.6438	6.16297	10.0074	4.29491	16.0983	16.8293	14.2737
ANKAR	0.999359	4.05941	1.11817	0.995468	0.349209	0.777155	1.76112	3.42195	2.31596	0.774024	1.3853	2.4019	0.55508	1.10001	0.297474	1.19987	1.12195	1.28817	2.61967	1.21889	3.71617	1.88858	1.64647	2.27859	0.765109	0.893205	0.819743	1.95992	1.41836	1.77708	1.07349	0.427156	0.615988	2.08318	2.07719	1.20122	2.02034	1.89024	2.51006	0.335691	0.25707	0.178768	2.16023	0.848159	1.77786	1.86424	3.68944	2.21195
ANKDD1A	0.545737	0.827033	1.94417	0.122985	0.138784	0.319298	0.488167	0.635382	0.560734	5.16633	5.67348	3.3823	0.512833	0.241547	0.232606	0.142877	0.0760912		0.321939	0.40411	1.11247	3.31723	2.4326	1.90245		0.133305	0.632176	0.709171	0.412702	2.271	0.224344	0.0358742	0.295846	0.284314	0.541178		1.77638	1.52282	0.993144	0.181639	0.569631	0.124763	0.126688		0.409544	0.273041	0.238819	0.931092
ANKEF1	5.53777	5.92444	3.83963	1.19046	1.33502	1.26038	3.13858	4.1722	3.60163	4.71371	4.97247	5.61623				6.42409	6.26429	7.3408	6.81809	6.77688	7.27028	9.6321	9.34247	10.3627	10.7734	12.0037	9.57148	12.1167	12.543	11.4663	6.14793	4.75963	5.6773	4.34891	4.68033	4.4618	4.14937	4.04613	5.43301	2.93779	4.13214	3.33226	5.98725	5.66193	5.04853	5.87051	6.87552	5.86893
ANKFY1	33.6107	32.9139	25.8425	36.9945	26.1955	27.9867	26.51	25.1348	22.945	16.686	15.0473	16.3008	24.8859	21.4121	17.1631	19.1388	19.0346	19.4593	17.178	20.9278	14.0843	18.964	24.4824	18.1837	22.0121	21.6034	15.2703	16.9919	16.5993	11.5434	11.8389	8.56237	8.3656	15.8315	14.7057	16.0242	24.8732	24.2694	20.5847	13.7768	13.8436	14.7396	16.158	13.7876	12.6824	8.58953	13.2652	11.8496
ANKH	23.4315	22.7546	20.1033	12.7602	11.8191	10.4248	7.95058	8.9812	8.25859	40.2531	50.0904	31.9701	82.5687	64.0931	61.3295	0.322205	0.0509199	0.0640615	15.7759	18.8486	13.4644	9.34769	7.54122	9.65884	7.40431	4.57837	7.45246	12.9626	10.5255	17.0838	3.57694	5.83712	6.58786	1.05593	1.34382	2.26673	15.0462	18.532	10.9665	2.5196	4.20967	2.65638	2.03286	1.92489	1.41035	0.0674121	0.342596	0.334065
ANKHD1	28.0304	21.9416	21.4808	33.5341	28.4689	22.5631	32.3731	23.5257	31.8474	18.5131	25.6343	22.3028	48.8343	47.7943	46.8398	26.4946	31.8936	23.662	29.781	30.6756	33.2967	35.3661	36.4221	37.4664	29.3521	27.6559	26.1665	20.8651	19.1774	16.922	27.5954	31.4562	25.9203	41.251	38.2873	36.0742	46.0449	46.1876	49.0501	47.8377	50.9847	53.0768	38.6375	36.5738	29.3477	32.5484	34.7418	34.6562
ANKHD1-EIF4EBP3	2.60128	0.926326	1.19143	4.97321	4.58076	4.24232	0.479655	4.22297	2.32153	2.30442	1.91339	0.461833	1.7497	3.93454	2.56612	4.68298	4.13143	7.78608	1.03545	1.80507	2.87191	2.79602	2.51261	2.55738	2.58793	2.10984	1.1428	1.43403	1.61042	0.948956	1.40314	1.3074	0.997581	3.79977	2.74063	2.81948	4.9544	6.21031	4.92623	9.61857	10.2508	7.50481	2.5125	2.94352	2.15741	3.826	4.01841	2.06497
ANKIB1	27.2742	19.6236	20.1042	30.3191	27.8649	21.3178	21.9569	19.2889	27.5118	18.5244	13.8297	19.8291	75.3313	72.6475	76.3301	14.1162	16.0486	19.6309	41.9529	38.1194	47.8701	23.4493	26.2212	30.108	29.9103	28.3137	25.5543	42.6393	39.6102	41.7311	43.5416	48.7374	41.1859	31.4138	33.0252	41.9765	39.6383	42.8674	54.7362	27.8699	36.8741	32.2816	22.637	16.178	20.5703	29.4119	24.0879	18.0854
ANKLE2	29.7764	28.7417	27.5874	21.3143	22.0516	19.4889	21.5762	22.207	20.7371	44.175	40.9052	39.9966	30.049	30.0914	29.2755	24.079	21.296	19.9119	22.5112	25.6143	18.1484	26.2141	21.1999	20.753	26.729	25.3462	21.3641	17.9044	17.1859	19.6594	12.5372	16.2313	13.85	26.6974	21.857	23.1064	28.3702	29.0432	25.5297	26.3059	18.1402	16.7249	50.2971	42.3044	41.3184	20.7446	22.0523	17.4163
ANKMY1	1.95253	3.36978	1.0271	0.739733	1.35242	1.14893	2.18323	2.68701	4.56802	3.02659	2.31858	3.36292	2.6976	1.47587	2.84693	4.03074	1.77776	3.29243	2.01744	3.18967	1.72518	0.783392	0.384683	1.12198	1.5577	0.946836	2.12787	2.11006	0.814956	1.84074	2.19066	1.70903	1.87972	5.5677	2.50303	2.02169	2.25812	2.02946	2.25454	6.03475	1.76126	2.37728	3.04724	2.3467	5.09597	3.81063	3.55644	2.46973
ANKMY2	8.03141	6.29558	6.15355	12.7994	10.1232	9.70232	20.6421	18.749	19.4147	1.34451	1.03116	0.903267	4.33697	4.49872	5.41317	4.77164	5.2039	5.28728	7.14126	7.18412	6.66028	12.8921	12.3861	12.5523	5.93398	6.18011	5.46291	4.8187	4.63078	4.64567	15.6128	13.6584	11.4789	5.12764	4.67471	5.77965	12.2785	14.7577	16.3096	3.16607	4.42111	4.05356	6.26632	5.06031	4.14911	6.70248	5.6982	4.82361
ANKRA2	5.29577	7.063	5.73231	4.47001	2.41235	2.27874	7.25048	2.69586	3.96448	4.8488	2.1863	2.40399	3.14478	2.22287	2.67046	3.83221	4.37399	3.66817	5.1732	4.0573	6.88255	5.48668	6.78142	4.29731	5.69699	6.68962	4.08823	2.97017	2.56544	2.66819	6.04716	5.0061	5.08518	12.2049	7.47883	11.9347	5.70988	7.87883	4.55126	2.14788	4.69288	4.49471	3.76277	2.02914	1.62167	6.41304	7.85701	8.23098
ANKRD1	1.04844	0.462879	0.622521	0.0388122			18.0178	14.6221	19.9928	4.2993	5.03267	5.42117	0.0453861	0.135237		0.08512			1.35977	1.76527	1.20341	2.26016	1.39378	1.29347	1.06715	1.63275	1.35303	0.525543	0.485088	0.531192	0.111498		0.0205276	0.0977695	0.19396	0.113231	0.380996	0.378295	0.191492	0.157311	0.0419864	0.0454024	0.609432	0.618775	0.493071	0.24827	0.154768
ANKRD10	18.0307	19.0535	22.7193	30.1281	33.8991	26.727	27.3335	20.998	17.4829	59.9404	66.2145	54.4499	35.4479	26.8988	33.8667	12.5094	13.8046	18.7058	6.86358	6.69269	8.9535	26.227	22.7023	16.9981	31.9911	36.2375	24.3004	16.946	14.168	16.7432	15.4729	13.5713	15.9487	10.7475	10.8626	8.31522	39.7014	37.2024	40.938	18.262	13.626	15.5007	20.4426	19.1302	24.0579	15.7034	11.8434	9.47001
ANKRD10-IT1	1.06175	0.284268	1.82013	0.305156	0.619855	0.271135	1.16372	2.39808	3.25667	2.96059	3.52375	5.95926	3.36862	2.02455	0.338778	2.58249	4.23211	2.46993	1.31172		2.06327	0.849113	1.33798	0.298405	2.0387	3.42193	1.08535	2.4404	3.94914	0.293707			1.29085	0.263119	0.270758		4.72663	0.639915	3.72602	1.23486	0.857552	1.17712	4.36264	3.45733	2.23439	0.539824	0.345852
ANKRD11	3.305	7.9033	7.2302	3.89615	6.38846	3.16276	16.5859	19.1824	16.1821	6.30403	8.94491	6.936	6.05591	7.97027	8.5959	8.61446	7.90798	5.1483	7.60589	9.39565	6.64132	6.28451	5.04029	5.01815	5.24693	4.72327	9.85119	2.64437	4.24846	5.82013	8.7665	8.56866	12.0888	12.9895	10.478	13.3414	3.93852	3.46916	1.28795	10.1835	6.18401	4.80647	5.51113	5.72942	10.4098	6.25232	7.95905	7.56765
ANKRD12	24.3369	22.9657	18.4476	22.7755	20.6212	15.5706	11.2253	7.19719	8.28282	70.2901	73.5077	85.2348	61.1486	65.0951	60.5017	12.4965	17.7779	16.3428	17.226	18.9507	22.4042	16.0904	21.6655	22.5677	16.2087	17.1362	11.0162	22.4972	21.4656	19.1845	19.7853	17.7299	14.1523	16.4624	16.0965	23.7918	34.242	44.0332	52.4194	12.5248	10.3984	13.2388	10.9282	11.7881	12.7325	10.8685	11.8135	12.7294
ANKRD13A	171.903	141.578	126.048	9.4862	7.14297	5.82725	10.728	8.84044	10.5171	10.6525	9.5943	11.8788	16.3553	15.3834	16.1031	12.1054	10.5762	13.748	8.76274	9.00628	8.95763	32.1552	32.8834	31.4849	24.0555	26.0884	26.4964	30.0729	24.873	24.0021	18.0903	20.1934	20.0177	6.95878	4.91054	5.77223	24.5648	29.5655	26.9719	14.1827	14.6207	16.6703	9.06951	6.10291	5.55627	11.8815	11.7243	8.33619
ANKRD13B	0.363225	0.518159	2.17391	0.60345	1.33701	1.58834	0.750317	1.37994	1.07589	1.78951	1.82715	0.728048	5.0997	3.34054	3.5223	0.22767	0.507838	0.554787	0.868438	0.674625	0.74219	0.834895	0.55843	0.470163	0.483092	0.768857	0.840854	0.552389	0.336113	0.781402	0.468545	0.41591	0.432985	1.25079	0.623895	0.178049	1.97334	0.777979	0.880017	10.4761	6.09189	4.03808	1.10485	0.948963	2.47913	1.34561	1.35371	1.06051
ANKRD13C	18.5543	10.9399	12.9997	17.8968	15.5139	14.0347	20.1095	18.3539	17.7924	16.1601	16.2565	20.4298	11.1142	13.0107	11.2835	12.8201	12.8616	15.802	6.26757	6.71672	8.82413	19.2999	16.6538	20.3854	22.2689	16.9284	16.8907	13.8718	14.4303	11.3048	13.9647	14.4732	14.411	8.59816	6.79806	13.2798	11.0248	12.9648	14.4814	10.3359	12.6085	11.2654	13.2736	12.8937	9.35593	9.24287	8.48917	8.62202
ANKRD13D	1.04585	4.06072	4.01398	2.13378	4.04065	4.45453	4.61723	7.3946	5.82417	5.91388	4.5038	3.5204	9.95396	7.58134	7.03055	15.2787	9.18512	9.41146	3.48557	2.36498	0.961996	3.93108	4.47784	2.68792	1.72571	2.61543	3.29813	3.69744	4.3688	8.64558	4.40678	4.2418	8.0018	16.0988	11.2679	8.54135	5.3161	2.34844	1.48386	10.0301	4.25305	4.44141	3.5766	3.26575	5.26859	6.04317	7.11246	7.15432
ANKRD16	1.35819	1.27505	1.56663	0.740178	1.04072	0.931175	2.97559	2.31063	3.39192	2.4209	1.61162	1.67004	4.14182	2.38187	2.8869	0.989332	1.02714	0.40008	2.60203	3.67175	1.47415	1.57574	0.85764	0.67343	1.47057	1.5046	1.62217	1.72308	1.2396	1.17766	1.28971	1.71909	1.79768	2.07235	1.83049	1.95974	6.92758	5.08082	4.07996	1.46003	1.3014	0.662284	0.89409	1.03157	1.66364	3.00722	3.21739	2.65421
ANKRD17	23.5939	20.9662	19.3059	26.3862	20.8993	18.049	30.5788	26.536	28.4379	21.9589	23.3808	24.0987	25.2537	26.0981	24.191	26.1106	27.5449	31.4366	30.7812	30.2091	31.4724	15.9245	16.2707	17.9676	38.1007	38.326	34.281	21.3142	22.0106	21.6948	19.2806	20.5383	19.7429	10.9315	11.5729	11.1962	21.5021	23.1311	24.4495	29.69	34.1244	34.9242	28.1516	27.6068	24.0386	11.6131	11.6532	9.32456
ANKRD18A	0.0289519	0.0349561	0.0221462	0.597384	0.594112	0.7489	0.957661	0.71372	1.09193	1.1695	1.26397	2.65617	0.240438	0.136149	0.25133	2.26207	3.9795	2.79119	0.0092604	0.0196261		0.420334	0.393165	0.642189	0.317375	0.778255	0.303543	0.619781	0.568334	0.423308			0.00468771	1.46958	0.45784	1.51082		0.52489		0.046025			0.734352	1.06597	0.405681	0.652285	0.309061	0.17981
ANKRD18B	0.0311763			0.178179	0.0702151	0.505676	0.217757	0.116092	0.187473	3.7486	1.79206	2.44896	0.130518	0.0664142	0.241073	0.617994	1.07245	0.656656	0.013255			1.12688	0.750032	0.844638	0.133989	0.0241577	0.013167	0.088191	0.00495945	0.0340462				2.18152	1.8964	1.99915	0.125812	0.158865		1.16067	1.20216	0.668743	3.1608	3.39848	2.70608	2.20226	2.33594	0.936507
ANKRD22			0.0500199	0.0250487	0.0291188	0.0804126				1.33388	1.05137	1.33054	1.72154	2.08387	1.48731	2.18877	2.64498	3.34444	0.0260641	0.0553221		5.02086	5.45306	5.93956	6.20326	6.42679	4.96042	2.39037	2.54449	1.89737	2.71926	3.35233	2.37144	0.15086	0.110658	0.0581338				0.895893	0.8368	0.991241	0.419611	0.31786	0.440573	18.5824	16.0969	13.5757
ANKRD23	0.169579	0.967643	0.138188	0.334546	0.248477	0.020153	0.782541	0.402065	0.825145	0.758539	0.293334	0.442108	1.12877	0.369726	0.738362	1.50829	0.670853	0.464043	0.205535	0.740797	0.211859	0.681006	0.779364	0.277758	0.323528	0.426357	0.291665	0.324815	0.603578	1.61789	0.293537	0.685859	0.452692	2.76462	2.43885	1.87114	0.752001	0.596535	0.112601	1.22902	0.384096	0.320125	0.353335	0.14907	1.03918	0.261043	0.276564	0.633458
ANKRD26	4.59873	3.84924	4.01209	6.6465	5.14632	4.34559	6.32292	4.67069	5.6734	4.64882	5.70204	4.79963	4.78729	5.59814	4.76315	3.16435	3.38252	3.37496	3.33424	2.94309	3.78135	6.98034	7.13497	10.3613	3.01045	3.20952	3.87465	5.53473	5.56172	4.91048	6.99049	7.54513	6.96124	2.3877	1.99267	2.55049	2.85895	3.10093	3.44697	2.31053	1.85098	1.59758	4.54832	6.03297	4.63336	2.66558	2.5717	2.24363
ANKRD27	23.1092	26.5526	20.2401	16.003	10.496	9.69286	17.9613	13.432	12.3336	21.8937	28.5499	20.1416	38.1345	36.6402	29.43	12.6397	15.2097	17.0263	14.2834	14.3566	12.8978	19.4297	22.9857	25.6517	27.4828	29.2597	25.9975	14.8568	17.3032	13.0326	18.4594	19.3662	18.0411	17.1765	19.4818	17.5234	27.6547	26.3822	24.6183	11.0911	14.9934	13.0263	8.69352	6.51932	9.56048	7.91011	6.82372	5.71036
ANKRD28	56.043	47.3397	43.1992	49.7211	39.8342	30.7179	22.4484	24.2351	22.2753	71.4627	72.5776	79.2319	14.5257	21.4985	17.5945	16.65	15.4552	12.932	9.37333	11.5904	13.1322	30.6628	31.197	33.5697	26.9213	31.0884	24.1646	32.407	31.7902	23.6977	32.3869	35.7195	32.7532	21.5053	19.4127	28.92	34.9457	37.9365	41.3479	14.8089	12.0491	16.0101	16.5658	17.8136	13.5011	11.327	11.2152	9.12899
ANKRD29	0.387583	0.229045	0.170246	2.07877	1.12433	2.42373	2.25168	1.65483	2.3545	1.48665	1.66131	1.53261			0.209118	0.0832948	0.381313	0.135836	0.0104881		0.0131306	1.04065	1.34922	1.33742	3.01086	2.56113	2.18048	0.6059	0.15643	0.146227	1.22567	2.24077	1.95742	0.655423	0.766445	1.15146	2.28709	1.45178	1.33186	1.00349	0.891448	0.892352	1.43683	0.434941	1.10144	0.399454	0.822798	0.371769
ANKRD31	0.0252098	0.0171433	0.0696156	0.00572914	0.0202162		0.743839	0.468308	0.762453	0.257107	0.128072	0.305609	0.0744133	0.0943775	0.0383893	0.0714321	0.0518361	0.0773421	0.364085	0.47571	0.346257	0.327002	0.282515	0.117616	0.0923963	0.192898	0.048138	0.126633	0.102666	0.159004		0.012328	0.0307244	0.0699416	0.0322526	0.0745839	0.0238778	0.0410954	0.0380322	0.0870609	0.0813519	0.0152684	0.214341	0.131786	0.307553	0.142088	0.0717424	0.077294
ANKRD32	7.22809	5.3867	6.49041	8.11065	8.34553	7.22744	9.6838	7.72661	7.66958	4.51597	4.87973	4.63129	5.4492	6.76855	6.30595	7.71416	7.83429	8.38458	7.96349	7.68667	10.3185	4.51236	3.75872	6.08199	7.79373	8.38346	7.10906	4.04807	2.99904	2.81193	3.39494	3.22811	3.03469	6.67689	6.39015	8.6551	6.25858	6.30538	5.81018	3.83907	4.96114	5.0396	6.91541	8.06502	4.87976	8.10665	10.4971	8.06886
ANKRD34A	0.0163474	0.0246599	0.089942	0.099017	0.127765	0.187795			0.0177177		0.0110361	0.0193505			0.0198334	0.355237	0.284425	0.20521	0.088778	0.121761	0.0121569	0.061511	0.0153393	0.0854395	0.0496037	0.00475268	0.0414729	0.0103864	0.0415881	0.00594755	0.0191434	0.0106223		0.120501	0.0610475	0.104992	0.0154336	0.0304449		0.0173084			0.0167795	0.0265376		0.111696	0.185048	0.212744
ANKRD34B				0.0450842	0.0529132	0.0782357	0.121999	0.0919805	0.0753534	2.35971	2.20368	2.10718	0.371688	0.274927	0.277131	1.15533	1.30723	1.13227	0.0285563			0.0373587	0.0931807	0.184842	0.0180719	0.0346368	0.0472359	0.189288	0.227402	0.216832	0.113413	0.0290361	0.0674585	0.576443	0.515944	0.982141	0.862455	0.794686	0.96538				0.275226	0.106416	0.331713	0.116328	0.185219	0.0121195
ANKRD36	9.91512	8.11409	7.07243	3.00349	2.5949	2.69709	7.40343	6.46798	5.37751	8.28366	8.60732	8.87768	7.0956	7.84327	7.36015	7.95765	10.4714	6.98362	11.5753	11.4818	10.9708	3.22204	3.83095	4.16764	4.86126	4.43904	5.07922	10.8714	10.2157	10.9974	5.53788	6.46673	5.60092	17.2242	12.2748	12.8926	5.52237	4.57361	5.20884	6.31613	4.65098	5.36631	10.0805	8.54443	8.82709	2.61373	3.41815	3.30234
ANKRD36B	7.48901	6.54699	6.71729	1.7762	1.63325	1.56035	4.79841	3.59088	3.46807	4.42864	3.45498	4.27522	5.01372	5.12958	4.56394	6.95709	7.51895	4.85175	7.44528	6.40488	5.66119	1.83539	2.74265	3.12077	4.38968	3.65024	3.46635	7.78208	7.88509	5.84293	3.9617	3.40732	3.44188	5.93484	5.11728	6.15392	3.36268	4.22592	2.85906	4.09084	4.1672	4.45581	9.60395	6.70431	6.61953	1.36171	1.31901	1.53843
ANKRD36C	5.53715	4.66808	4.22443	2.81906	2.98307	2.6291	4.66795	3.77342	4.03819	4.1715	5.71906	5.08011	4.82519	4.85998	4.99032	5.14606	5.98964	3.85309	3.55221	3.97846	3.72054	1.24374	2.23877	0.867406	42.3976	40.1713	37.8238	5.49045	6.43639	4.81794	8.92756	9.18641	9.60849	7.95237	5.46724	6.012	2.95979	3.49768	3.64899	3.72732	3.69465	4.03345	22.6088	22.8006	16.2964	1.85294	1.83064	1.9313
ANKRD37	0.647983	1.09778	0.852007	1.83593	1.97235	1.17458	1.23759	1.30217	0.667738	1.28723	0.226776	0.25611	1.08061	0.262114	0.849566	2.67243	2.77423	2.92988	4.89005	4.3739	3.92763	1.12227	0.387602	1.10816	0.347149	0.290363	0.236028	2.30029	2.46515	3.3165	0.742583	1.35441	0.824463	0.56809	0.617867	1.61336	1.4303	1.82943	1.49238	0.574793	0.24523	0.659673	4.05905	3.58234	5.10309	1.01976	1.17791	1.90075
ANKRD39	1.32495	4.91952	4.46023	0.621407	3.69205	4.14347	3.20721	5.49845	4.3773	4.95746	3.33706	3.45084	1.85626	1.48482	2.25694	4.37786	3.97525	3.39906	6.7023	4.9352	1.7195	1.79963	1.38725	0.424073	1.34387	1.95832	3.09663	1.16395	1.81318	2.77142	2.94817	2.21691	2.97575	11.7195	11.3611	7.78878	4.08721	1.81629	1.03974	4.21388	2.93471	2.35681	0.777394	0.942831	2.56805	0.838855	1.95715	2.27144
ANKRD40	15.3303	13.3809	13.2054	9.47116	8.24301	7.59097	17.5443	17.5741	17.2656	23.6183	22.2525	23.294	6.69832	6.84015	6.38184	10.0354	10.9346	11.3437	17.9024	18.0814	16.7673	15.3102	14.8947	17.7037	19.197	17.9815	17.879	19.8531	18.9838	15.7121	9.50896	9.10871	7.23704	7.53904	9.10144	9.55845	12.3919	14.7978	12.9578	8.7752	11.1008	9.03622	17.1772	10.5192	13.4547	15.305	14.7416	13.129
ANKRD42	2.68044	2.13353	1.68542	1.23863	1.40106	1.76556	1.64433	1.66223	1.64688	1.28456	0.938196	1.87387	0.423278	0.349549	0.630808	2.53633	3.31697	2.53901	2.76495	2.74517	3.24256	1.73242	1.4279	1.59789	3.84418	2.65609	3.52287	2.35848	3.0736	2.41255	0.796529	0.773774	0.577471	1.96836	2.37434	2.05278	3.27178	1.60104	2.1098	2.583	2.63064	2.93946	0.608137	0.618109	0.675297	4.13786	4.36749	5.53325
ANKRD44	6.92888	2.37763	1.78559	1.69089	4.98638	0.422143	2.83446	0.708259	3.24116	2.02094	3.22342	2.58929	1.08662	0.97258	1.40399	2.35479	2.78155	4.36416	9.77538	6.33987	3.92405	3.38874	2.10037	1.42633	0.747122	1.99714	1.02705	2.46866	4.79737	1.47948	2.96956	6.12385	4.59503	2.82634	3.23493	4.87099	8.24021	7.92501	6.75495	0.920783	2.55295	1.62895	1.0451	0.642601	0.821025	3.1421	3.2884	1.49791
ANKRD46	6.98417	6.70336	3.66144	6.45354	4.7396	6.46993	22.9547	18.5544	21.505	7.14815	6.85167	7.32307	8.12927	8.67839	9.28765	40.9723	36.7255	41.6943	17.1393	15.2781	18.0972	13.7415	13.2906	10.9124	20.4658	20.2483	15.8015	7.02506	7.6959	5.38252	7.26785	7.97756	7.32315	13.3116	16.1773	15.1963	6.78124	9.18222	11.1259	4.96912	5.6626	5.58772	7.60399	4.43414	6.10172	14.6535	16.6436	11.9767
ANKRD49	16.8004	15.9347	12.0038	7.72289	9.08798	5.76296	8.82424	7.00878	8.95658	6.13331	9.19862	8.56451	8.3093	7.52683	8.27179	2.6364	3.06651	2.85914	8.95213	11.0385	10.7044	9.52821	7.66975	9.79775	43.6783	40.7297	38.0902	9.5242	10.7533	12.2081	7.24517	7.55655	5.63643	8.28257	8.82225	9.15517	6.7422	7.77093	10.5484	4.42891	5.23748	6.73054	11.0244	8.82676	8.63779	16.2261	19.8869	15.7762
ANKRD50	6.86851	5.41739	4.33212	16.8301	11.6779	10.8571	7.20638	5.70307	6.4252	4.87136	5.19825	5.16961	9.80202	10.7821	9.95989	13.1325	14.5289	15.5973	15.2064	15.4998	16.8726	9.89537	9.03835	11.0761	18.304	18.9502	14.8031	13.4989	13.2858	10.7542	15.0941	15.8085	15.2859	19.502	19.3851	22.0936	21.7596	23.0646	26.7804	3.98211	4.56309	4.70301	2.40206	2.42291	2.11629	5.99388	4.86763	4.42784
ANKRD52	6.13942	8.02691	7.47182	2.80933	3.64916	4.37855	17.378	19.0185	14.4382	5.36729	8.37728	4.58737	8.61301	7.03293	6.23726	23.016	17.1305	15.1455	5.37312	3.34985	2.82668	7.13259	3.98371	5.29967	4.47355	4.32695	4.95786	6.18807	6.85162	7.80231	3.17846	7.00118	8.94106	15.9689	12.9318	10.3446	20.3119	15.5436	7.34305	19.9755	11.3825	10.2999	4.31026	4.18156	4.87299	6.10901	6.21939	9.21249
ANKRD54	4.40234	7.75377	7.25845	8.15611	11.9572	12.5194	8.39976	11.1975	9.23758	13.4017	9.72737	11.1518	8.36168	7.50852	4.76162	10.478	10.2712	8.65808	10.7499	9.33298	4.61738	8.53171	7.31428	6.08271	4.9881	4.62913	7.58574	4.13297	4.15229	7.49583	12.0514	12.9686	12.3912	4.8723	4.4784	4.54142	12.4866	10.3086	5.3398	8.21545	5.84728	4.76497	2.87055	3.41685	4.14312	6.42572	8.33814	7.6716
ANKRD6	3.07082	2.28729	3.45843		0.0441655		1.51257	1.73665	2.44899	1.99652	2.21465	1.37102	3.342	4.58013	3.89536	0.0897858	0.151688	0.558115	6.05234	5.51116	9.90948	0.369781	0.232534	0.416752	1.30566	0.7257	1.04283	2.33471	1.55998	1.17531	0.00715083	0.0478856	0.0473977	1.58598	1.7459	1.71129	3.01105	2.55111	2.32596	2.46778	2.66015	2.99611	0.39044	0.428567	0.788663	1.25075	1.88907	1.31865
ANKRD9	0.181672	0.109673	0.436975	0.877799	1.07608	0.608699	0.330085	0.854541	0.770621	0.502849	0.437478	0.617339	1.94766	0.970394	0.748104	0.747019	0.787324	1.06218	0.612566	0.779567	0.392146	1.11893	1.21857	0.561319	0.120604	0.231358	0.399637	0.843624	0.934657	1.4582	2.21214	1.15827	2.09102	0.969458	0.842686	0.697158	1.73025	0.996971	0.994494	0.446885	0.361116	0.222381	0.242105	0.455595	0.401517	1.6394	0.886526	1.0877
ANKS1A	5.07584	4.88918	5.71309	2.10449	2.51611	2.92832	4.8489	5.33057	4.95825	5.38018	4.39516	3.87758	14.2549	11.111	11.9133	6.43962	6.00641	6.54145	5.41187	5.11883	3.35925	5.96772	4.70747	4.51515	3.32974	3.81458	3.64997	2.528	2.75418	3.02348	5.64566	5.55604	6.18656	4.73131	4.12149	4.31779	2.68754	2.38984	2.10858	4.19104	3.5363	3.11034	2.69918	2.08066	3.41797	3.34455	3.79772	2.5428
ANKS1B	4.11401	2.5708	2.15251	0.642775	0.90867	0.777981	0.112724	0.0492657		1.05274	0.477263	1.82115	2.45542	6.17626	2.45921	5.90447	5.70769	3.77522	1.70176	1.69654	2.84556				2.14455	3.72247	2.1528	0.339852	1.72758	0.655708	1.45878	3.3229	2.61998	7.61709	8.63467	12.1764	0.0524298	0.122628	0.232389	3.32685	2.31734	2.41453	0.702835	1.81666	0.713733	6.81271	5.50386	5.8298
ANKS3	2.80437	2.94434	2.87504	3.93355	6.87594	5.60414	4.07175	6.34447	5.44102	2.24005	2.03395	1.83153	4.62835	4.04207	3.45785	4.76252	3.44142	6.11805	3.18216	2.86441	1.44173	4.18612	2.00453	1.89652	2.67903	2.3354	2.34847	5.65739	7.47161	8.5662	4.7226	3.91294	4.48125	5.25441	4.45744	5.56974	9.63756	6.6476	4.96981	5.57582	2.93923	2.56954	0.971117	2.12703	2.106	2.67985	4.24526	4.38121
ANKS6	2.88467	4.52165	3.85696	2.50959	5.82787	4.2097	5.65867	6.68714	8.30138	7.08852	5.00129	6.39825	1.62758	1.62619	1.15496	3.63541	2.63322	2.91694	7.05608	6.03103	4.81328	4.03485	3.77086	2.45526	0.801627	0.568618	0.579	1.3664	1.42559	1.36182	3.05872	3.15227	3.33833	2.45739	2.37019	2.27532	4.85582	3.81475	2.52838	3.75395	2.70631	2.0157	2.53707	1.81782	2.89793
ANKZF1	7.63806	7.8162	5.08888	5.21323	5.35091	4.40222	8.30955	8.40789	8.62898	9.22415	7.60542	10.4061	12.4921	9.67246	13.2313	9.11368	13.7951	8.2811	11.5725	9.48312	12.2373	3.45374	4.00447	3.13469	5.52102	4.67814	5.29797	10.8685	10.7285	12.8232	9.6633	8.28801	9.36682	24.7737	19.3348	19.7613	9.20858	7.70508	7.19167	11.3711	12.9055	14.4835	14.9874	13.2052	9.58706	5.44265	4.9952	6.29896
ANLN	272.882	189.574	185.224	187.808	141.109	135.575	106.504	88.8682	80.4713	171.893	183.709	187.031	80.4614	66.0703	68.3787	74.6535	86.542	104.576	100.875	93.608	105.34	213.613	217.81	233.635	208.633	197.845	160.695	63.852	61.4211	55.1404	108.876	108.37	101.798	31.3081	34.2249	33.3548	194.967	243.499	233.117	126.664	137.479	150.106	59.9153	52.5536	50.0775	106.806	88.7521	70.996
ANO1	2.56765	3.57557	1.91263	0.0625822		0.243252	0.148298		0.0120224	47.8378	46.8736	39.0901	15.8556	18.5339	13.6697	34.9097	30.4329	36.8557	3.27077	4.37728	5.06336	35.7551	29.4805	27.1804	84.0123	77.2017	77.7015	1.47115	0.636643	1.0413	4.53516	4.41929	5.50792	0.238691	0.363636	0.227508	0.460869	1.0533	1.40479	14.6228	14.3736	10.9273	14.4713	11.5003	14.1533	2.99624	3.10899	4.42059
ANO10	30.0825	18.0971	15.0009	31.2623	19.483	17.0881	20.9863	16.1437	20.0817	12.1815	18.0393	23.3065	12.9872	11.5565	10.6888	16.3002	18.6097	15.7781	10.2839	17.8048	14.3283	16.0431	19.1517	21.1643	29.2574	21.5937	20.0758	17.2791	15.1122	10.5363	17.8615	22.4961	19.8533	17.0457	17.393	15.8575	7.1679	13.7704	11.7486	12.1606	20.0507	13.8351	15.3327	17.0962	16.9421	35.3953	47.5205	39.2159
ANO6	49.6205	40.356	39.2567	23.3459	17.7392	17.7435	26.0658	24.1465	25.8424	26.9754	25.5718	29.3558	25.0203	27.0456	25.3905	8.13576	7.2189	9.19111	13.259	12.7879	13.3481	31.3721	30.9673	33.938	32.0167	30.2063	23.9102	16.0187	14.2908	12.5729	27.4421	27.4177	26.1025	8.56455	8.17412	8.75968	31.3697	34.6195	37.1145	11.3454	13.35	13.8961	19.9838	17.2631	17.4709	19.139	18.5018	16.7738
ANO7		0.141118		0.0709417	0.0803998	0.0435938	0.274941	0.736649	0.673237	0.119862	0.0955005	0.0861274	0.1429	0.16482	0.303196	0.0584115	0.171218	0.202592	0.0541013	0.067472	0.280846	0.104513	0.0546586			0.0969536		0.0422369	0.190041	0.120625		0.108087	0.192986	0.636824	0.184505		0.330218	0.323934	0.0666962	0.739567	0.66215	0.571495	0.181923	0.129987	0.0981066		0.153611	0.047241
ANO8	0.149977	0.293098	0.370066	0.161854	0.370033	0.434422	0.415159	0.524261	0.590124	0.704213	0.3801	0.416637	4.59673	1.93894	2.7842	1.38368	1.39313	0.611549	0.0989652	0.123939	0.104737	0.264772	0.132094	0.0860329	0.418344	0.376395	0.749963	0.161007	0.161197	0.204953	1.44308	1.59157	1.75099	0.951322	0.382465	0.457236	2.03177	0.937469	0.64898	0.894269	0.278526	0.311969	0.250484	0.393185	0.627046	0.256538	0.493989	0.446802
ANO9	0.232036	5.47026	0.698154				0.0901231	0.0988038	0.121228	1.9022	1.35355	0.926827	0.926265	0.732728	0.918013		0.0214895		0.396566	0.178593	0.0780417	0.384478	0.150269	0.278955	0.127193	0.167025	0.553543	0.4613	0.723243	2.14515	0.451212	0.30459	0.794182	3.46856	2.17231	1.58758				2.75365	1.01676	0.910726	0.364918	0.125532	0.947819	0.21602	0.685297	0.798906
ANP32A	155.727	156.14	140.818	63.2492	56.6362	48.5389	159.449	149.239	133.862	90.2093	80.9155	85.334	81.5037	94.8857	87.7755	65.7917	70.5719	72.7818	136.153	153.639	137.4	152.18	136.345	139.062	134.529	130.815	127.852	57.3853	59.8412	67.6563	98.9662	98.573	84.2199	62.4837	57.8667	69.8094			0.189937	68.1699	71.7111	69.9966	51.5417	44.8168	56.4514	68.934	74.5959	51.0789
ANP32AP1	10.6779	10.4557	7.82233	3.4881	1.95845	2.45287	6.20726	5.44637	6.28321	5.20413	5.05731	4.53309	3.11022	3.33174	3.94099	2.95314	3.23565	4.8474	8.0445	7.68213	5.94179	7.78124	6.44063	5.8245	6.64821	7.1312	6.34935	2.95479	2.03385	1.88244	4.81464	5.01463	4.82037	3.87603	2.69443	3.83847				2.36793	4.04629	4.00983	2.68543	4.75277	1.97868	2.61399	4.46743	2.72116
ANP32B	36.2446	25.2378	27.1225	55.0136	33.9965	33.614	55.6405	64.1121	52.9094	13.9719	25.3574	16.0928	37.9705	31.5911	48.9234	43.9275	40.7079	59.1639	37.6018	45.297	60.4569	40.8929	52.8079	77.5137	41.2068	43.233	42.7415	14.5969	18.7566	23.3509	34.8923	48.5564	39.4734	28.496	24.0497	33.7915	56.614	56.1862	64.3586	65.4567	80.4432	63.6303	27.0149	21.6377	27.2696	14.324	6.76785	5.47185
ANP32BP1	9.41341	6.21667	7.10942	10.0148	6.04576	7.34726	12.0333	11.8702	8.78854	4.4195	3.0274	5.36871	5.77238	5.60211	6.59759	6.36934	6.59174	6.04701	7.4405	9.3118	8.73928	8.43939	9.76741	13.0708	6.30649	8.89142	4.97296	3.05102	3.84924	2.95369	5.41519	4.35609	6.03004	4.09238	3.45353	5.28023	9.09812	9.55083	10.1435	8.56404	9.28509	8.40131	4.42253	2.33688	3.21602	1.09361	2.66173	2.27211
ANP32C	0.603926	0.303383	0.298121	0.0774124	0.0872789	0.0793733	1.48729	1.17903	0.435354	0.176031	0.165861	0.503153	0.261198	1.02413	0.883015			0.0815696	0.461693	1.14845	0.888948	0.621145	1.1457	0.815807	0.764209	0.433379	0.465728	0.231967	0.0768329	0.348659	1.19181	0.397527	0.309781	0.525378	0.0813442	0.341543				0.0863417	0.563924	0.258216	0.166317			0.236559	0.368736	0.582531
ANP32E	7.1464	5.73585	4.39673	24.8493	18.0878	21.5138	22.8572	19.7299	19.8633	19.5526	19.8291	23.9917	32.6233	38.7366	39.766	0.75117	0.616425	1.10761	16.6475	16.5698	18.8355	16.3666	14.4321	18.6889	0.174017	0.19213	0.0399393	11.5158	10.0145	9.13075	35.1988	39.2893	34.7307	4.51875	4.89339	5.2414	7.794	8.6546	12.3807	2.43282	3.01717	2.86113	12.6686	10.6385	12.5964	10.3033	11.0409	10.4284
ANTXR1	30.8734	30.0318	24.6252	27.0108	22.0141	21.0435	13.091	10.2386	9.50272	28.4625	31.1694	28.7244	6.48225	8.17977	6.89388		0.026737	0.100752	7.11303	7.65291	6.29347	8.39998	8.29889	9.10894	9.34391	7.39098	7.07927	16.5674	18.6589	12.9742	21.2705	22.0646	21.274	1.1652	0.928535	1.49821	39.8042	41.6542	42.1587	0.115944	0.0129114	0.0140032	16.5065	16.1641	16.1723	4.29507	5.23969	3.97644
ANTXR2	0.864111	1.13859	0.372573	15.774	13.1138	10.0057	0.114629	0.588124	0.0962363	9.59036	10.7119	11.1955	2.09711	3.09494	2.73717	0.239077	0.128405	0.234064	15.1792	15.3164	15.3454	4.88515	5.40176	6.95855	15.5784	18.6754	17.9354	4.47067	5.54147	5.16769	19.3195	22.815	18.6014	0.0275833	0.0502659	0.132294	13.2368	13.3459	14.7862	0.0573171	0.0135354	0.0538483	6.31821	7.61053	7.2133	0.499738	0.14511	0.549514
ANXA1	17.112	13.7554	12.1117	964.963	717.188	718.37	92.9589	78.2593	80.0559	439.75	437.885	479.869	26.2653	30.6466	23.9609	3.60189	3.41794	3.96721	128.769	120.446	128.306	676.904	712.154	793.156	556.922	573.797	489.684	485.995	458.484	417.853	668.234	658.352	595.125	24.3557	23.2152	21.9295	183.284	217.855	246.313	13.4403	15.7508	15.437	161.809	128.453	143.336	2.87082	2.16363	2.23719
ANXA11	48.1217	23.4552	31.0558	97.8105	69.9802	90.3335	77.0337	72.6146	89.74	39.0206	31.3798	42.2982	53.3285	63.3924	62.7368	12.8092	18.2761	17.6967	51.8486	43.815	60.9408	77.4482	63.4074	49.9536	68.7756	60.8409	63.8514	63.2664	71.0382	46.1623	104.659	81.1039	84.1763	15.9031	14.4359	14.0164	19.975	20.129	24.6354	63.2293	90.5221	79.3237	37.3567	25.3234	24.1461	27.3665	16.2701	22.417
ANXA2	990.949	836.42	748.663	218.465	178.123	178.759	103.467	104.681	100.271	485.51	455.109	512.587	134.108	159.091	133.732	17.8773	19.0523	19.2037	178.682	190.039	181.561	360.585	358.267	352.118	427.833	399.003	376.857	333.99	315.008	275.414	303.895	283.838	251.087	44.3605	46.6847	46.553	300.559	359.428	388.427	28.2122	35.0506	35.2511	112.255	84.6484	96.7341	117.508	89.7626	85.712
ANXA2P1	1.80919	1.40762	1.29955	0.331364	0.466915	0.347085	0.260225	0.140837	0.175954	0.7896	0.415922	0.965507	0.145881	0.143836	0.164812		0.0277023		0.492517	0.220584	0.300311	0.595297	0.61433	0.67764	0.506176	0.625225	0.5198	0.492958	0.49121	0.294231	0.426046	0.50584	0.366051	0.0502921	0.109829	0.0288352	0.543015	0.892262	0.520455	0.0578309	0.377912	0.173971	0.139593	0.263417	0.027404	0.026502	0.267667	0.0984505
ANXA2P2	2178.21	1674.21	1550.08	487.163	366.884	372.503	209.084	201.663	195.023	933.534	815.628	934.405	298.269	326.365	294.375	39.5351	38.862	49.6504	324.242	336.969	365.245	678.562	684.897	722.263	920.228	886.569	747.158	686.658	662.581	589.074	645.505	632.041	541.465	101.351	106.991	102.193	628.937	794.194	881.699	74.1297	90.816	79.673	210.443	163.817	174.535	245.443	226.587	185.821
ANXA2R	0.167377	0.385981	0.152524	0.489379	0.768797	1.50908	0.348887	0.494921	0.400105	0.783641	0.861597	0.508415	2.23375	1.82706	2.10656	1.27908	1.03908	1.465	0.106131	0.206342	0.349719	0.626898	0.294856	0.363149	0.253224	0.226122	0.422154	0.686786	0.405119	0.68453	0.890998	0.540611	0.626331	0.970873	0.920565	0.671249	1.29228	1.09045	0.926601	0.097874	0.0548604	0.0791419	0.0948161	0.161792	0.0934158	0.108165	0.306747	0.314951
ANXA3	70.1665	52.4907	48.3101	0.885842	1.21783	1.35993	69.888	58.4577	62.5611	199.106	188.579	216.376	26.2045	27.3204	24.3215	2.79055	1.62865	2.79321	3.24175	7.91113	6.47126	114.618	117.195	117.755	138.924	139.411	118.055	30.8223	30.3425	26.21	29.1491	34.4424	27.7385	19.4866	20.8138	18.3886	6.52076	7.08261	7.90392	11.228	8.85577	11.0323	194.839	145.923	155.821	10.0644	9.33006	8.2058
ANXA4	12.5786	13.7369	14.857	17.7236	20.9601	33.8234	95.5451	126.148	100.943	85.3109	70.2943	60.4498	14.097	9.56146	12.1467	26.9088	23.2974	26.4294	17.4506	17.5075	17.4855	43.437	40.3036	25.7257	28.9344	26.0358	27.7117	23.4151	25.1005	33.4531	35.8585	33.2775	33.374	31.9379	37.2502	28.6424	25.2674	24.0588	19.5959	19.856	18.5344	18.6903	9.78725	7.53598	10.433	20.865	25.8138	20.0957
ANXA5	280.619	229.021	213.358	600.738	475.485	470.808	138.755	136.849	136.085	125.5	119.379	138.158	61.7945	69.2313	61.8363	85.1397	90.1042	96.1649	235.877	231.388	236.613	162.429	169.713	179.092	177.637	171.519	148.664	218.647	220.199	201.465	121.302	124.018	100.981	55.4583	62.9476	67.8623	321.08	373.684	412.968	56.805	72.4931	65.5538	173.669	127.745	147.609	145.644	130.791	124.858
ANXA6	3.37825	3.03625	3.08381	56.2157	49.6152	46.3725	69.0492	74.4555	65.7663	20.9322	18.2669	18.0082	121.185	123.56	105.549	77.084	71.7324	90.2346	72.8259	85.6026	75.4305	17.1368	14.0576	11.7042	2.38226	1.65208	3.05753	46.3673	42.0661	36.138	3.39721	2.75681	3.23878	15.0781	17.6368	12.2438	164.006	216.998	164.809	95.4085	98.7211	85.4695	9.14029	5.61433	8.96933	102.702	92.9667	89.7587
ANXA7	149.159	129.214	103.563	155.542	126.255	120.746	73.1766	73.564	74.6678	126.524	108.636	124.789	126.992	139.231	118.177	60.1155	60.2127	77.8117	46.9008	46.9659	46.5092	111.583	114.339	92.0289	116.603	90.7003	92.8717	168.148	159.461	132.102	129.782	115.775	104.474	66.1535	72.0967	67.5066	55.6053	73.1583	70.9576	88.9654	98.7139	88.0602	60.2529	47.0043	56.1391	199.756	190.834	148.59
ANXA8	6.42905	5.9458	4.32491	0.082623	0.106041	0.101259	0.0926215	0.186868	0.305771	13.8423	11.6089	12.4683	2.61347	3.16185	2.46769	0.00380545	0.00775295				0.00421789	26.5557	24.9746	22.298	10.9177	9.41815	10.7125	0.473966	0.54197	0.72451	1.58527	1.55458	1.4446	0.307113	0.310686	0.238519	2.8508	3.61586	3.10088	2.96626	3.12258	2.97104	6.1049	4.9348	6.08705	0.0110136	0.0142539
ANXA8L2	7.34772	9.37535	7.65908	0.0853487	0.0689072	0.108805	0.0189731	0.194204	0.127429	28.9458	23.5617	24.1834	7.9902	8.5356	5.82594	0.0076109	0.0155059				0.00843578	59.1433	56.4888	45.0966	19.966	16.8426	19.3653	0.713766	0.647679	0.693608	1.88337	1.64554	1.47289	0.456569	0.606409	0.364959	4.32769	5.10347	4.08909	5.8392	6.22365	5.34086	7.43861	5.67568	9.3509		0.021032
ANXA9	7.5737	9.95637	7.99497				0.198075	0.2399	0.503613	0.236621	0.306728	0.165256	0.697999	0.667564	0.649076	16.3411	15.7904	13.284	0.846027	0.496205	0.724621	3.1841	3.08102	2.4743	1.40661	0.957487	0.88655	3.85943	3.72531	2.71046	4.56556	5.60837	5.56117	30.2024	27.0385	23.0496	0.0220105	0.0218838		8.66943	6.17447	5.30437	0.0716744	0.0678789	0.0235184	38.9997	36.7158	33.6685
AOC2	0.320945	0.30376	0.506621	0.04316	0.117821	0.124274	0.0297699	0.125427	0.119657	0.322467	0.435615	0.378272	0.276849	0.318982	0.134009	0.473443	0.482773	0.263237	0.151148	0.0160212		0.430112	0.442962	0.666262	0.25922	0.33682	0.135194	0.667458	0.558219	0.76366	0.0830746	0.0461648	0.137658	0.336766	0.240855	0.168743	0.506979	0.28451	0.0633033			0.0815522	0.546913	0.866951	0.542779	0.0616016	0.167852	0.21153
AOX1	3.30685	0.951829	1.25553	6.49333	5.99124	5.06034			0.00823719	0.75996	0.797978	0.441814	0.447229	0.660672	0.35341	0.226642	0.59763	0.116811	0.17839	0.115274	0.786123	4.00568	4.67736	6.00776	1.61444	2.39671	1.86235	1.41411	1.3673	1.35551	0.886944	0.0864431	0.348117	0.137997	0.319875	0.00813811	1.41402	1.55885	1.30143				1.53547	2.14818	1.04355
AP000251.3	0.742317	0.8963	1.30132	0.728869	0.484008	0.946773	0.12358		0.277179	0.62508	0.0656989	0.114198	0.138144	0.611594	0.311843	0.582625	0.523714	0.584586	0.857462	0.978038	1.20498	1.22789	1.21195	1.09437	2.04611	2.8534	1.53869	0.245571	0.305555	0.2084	2.96155	3.15226	3.6419	0.77396	0.453786	0.544541	0.612711	0.375612	0.194627	2.12259	1.46987	2.19228	0.924689	1.49369	0.971473	0.250688	0.336593	0.464643
AP000275.65	12.4191	6.98105	6.0987	7.82964	5.46742	7.89336	3.46429	3.14543	2.97454	4.9446	4.64383	14.0552	1.83526	2.73175	8.57171	8.25289	4.91441	16.8175	2.41376	0.365334	1.15142e-10	5.82025	8.91961	7.02588	14.13	12.706	12.5709	5.04717	6.23397	2.35263e-12	2.92075	2.37157	1.06753	0.853114	1.8296	2.42058	5.2585	4.72666	7.99413	2.95538	5.83895	5.56229	4.61445	6.00257	4.97039	10.2858	10.8718	2.38798
AP000295.9	0.434087	1.40495e-30	8.21043e-20	2.20944e-13	0.27518	2.94098e-34	0.784049	2.8675e-28	1.28915e-21	3.42652e-44	0.546887	5.5817e-23	4.04165e-17	2.067e-45	3.33084e-74	1.3264e-123	8.80083e-30	2.98091e-64	3.32781e-32	5.76478e-15	8.37245e-25	1.05786e-48	3.26501e-142	6.71268e-11	0.742392	1.60507	4.25603e-22	2.82487e-22	4.42933e-49	1.10058e-74	0.29825	3.89676e-128	2.25664e-33	1.76684e-179	1.90368e-65	1.25008e-05	0.129265	2.03681e-35	2.56728e-07	0.160769	1.88405e-31	8.01309e-38	1.66084e-14	4.6567e-20	2.83619e-35	2.17324e-26	0.000358498	5.38236e-09
AP000347.2	0.209557	0.187349	0.252945	0.0539701	0.648693	0.417999	0.0526451	0.732664	0.804636	1.02294	0.673269	0.529765	0.28693	1.60502	0.426993	0.989704	0.379972	1.07668	0.629285	0.655154	0.610568	0.0843853	1.21859	0.207604	0.250401	0.999693	0.188321	0.525159	0.318821	1.39188	0.665002	0.236517	1.06165	0.629289	0.199091	0.344604	0.512891	0.408768	1.41814	1.12712	0.865919	1.91778	0.533913	0.793843	0.521084	0.410483	1.25044	0.513244
AP000350.10	1.20499e-10	0.000202563	1.60774e-33	1.23962	4.16716e-06	5.89875e-11	1.54459	2.68277e-05	5.89191e-07	1.32123e-07	4.80606e-07	4.90299e-05	2.02888e-09	7.29943e-40	0.689722	1.57658e-07	2.47033e-35	1.01665e-10	0.926242	0.00138992	2.01196	6.73433e-07	1.27985e-06	0.00386863	1.53984e-15	2.29873e-13	7.33285e-06	1.82726e-11	6.25689e-15	1.22261e-09	2.00508e-21	0.00125743	7.39883e-06	9.32681e-15	3.07864e-08	3.29542e-05	1.99193e-05	6.94944e-06	4.83156e-15	7.56382e-13	2.94553e-14	1.64169e-43	2.15559	3.6667e-09	0.00120437	9.34717e-05	0.00134158	3.40384e-21
AP000356.1	0.0544434	0.0586999		0.0363425	0.213195	0.0960344	0.50669	0.826861	1.55182	1.5022	0.56543	1.41918	0.291428	0.141545	0.0594734	0.641059	1.35016	1.08397	0.952231	0.398253	0.364689	2.06333	1.63449	1.06981	1.01503	1.48671	1.20966	0.14942	0.255486	0.143566	1.56072	1.31384	1.15876	0.601527	0.492182	0.449179	0.366255	0.205253	0.0623431	0.832967	0.269725	1.18141	0.428938	0.165154	1.04922	0.47764	0.557442	0.185422
AP000487.5		0.113063	0.0857392	0.176636	0.0997003	0.488356	0.16347	0.256741	0.555004	0.0330063	0.555544	0.0138312	0.164472	0.099449	0.0378007	0.34035	0.254997	0.158463	0.0746124	0.0158212	0.0520811	0.6363	0.160864	0.16825	0.433487	0.272173	0.442564	0.248943	0.0445731		0.0136701	0.0759629	0.477113	0.312299	0.677154	0.14994		0.0291255	1.31911	0.0660131	0.0925097	0.0500748	0.111944		0.0472816	1.65743	0.377945	0.144285
AP000525.9	22.7739	20.5112	18.9356	0.240529	0.346995	0.185953	1.19689	0.673016	0.565185	18.2627	17.1816	19.4319	27.4028	29.3033	28.295				5.06648	3.49483	5.29497	10.729	8.99881	9.40547	10.3444	9.863	9.93612	12.7148	12.1345	9.73509	6.58899	6.4681	7.78521	6.67205	6.51987	7.35664	15.6841	17.6793	15.4999	8.06601	10.3614	8.73075	5.2096	3.74714	4.48997	12.7297	10.2295	7.69358
AP000568.2	2.27385	1.13832	1.42551	5.78447	2.53226	2.06107	5.82853	5.4991	3.99259	0.875528	2.2026	1.87945	0.208868	0.600612	0.232935	1.56543	1.55243	4.77054	2.1715	3.2082	4.94943	3.61599	4.39429	1.81455	3.27325	4.26262	5.21297	0.554246	0.906274	0.406695	0.816126	2.29265	1.62145	2.15993	2.45934	2.18223	2.81606	4.99549	0.393115	3.9608	1.16273	3.0381	1.98318	2.02059	0.191919	4.29171	1.69668	2.24419
AP000580.1	2.5912	0.680857	1.53877	5.7378	9.19542	0.668844	2.0415	1.27672	4.88508	0.395529	0.348345	2.36707	1.09163	0.681789	0.833779	2.55296	1.63974		1.00536	1.67005	0.345127	3.08767	3.98045	2.48015	3.23029	9.65458		6.13189	6.53874	5.38917	1.03716	1.4123	1.69769	4.26961	6.88948e-07	1.66602	0.415765	1.5512	2.70849	0.206671	0.340314	1.39239	5.48854	2.20016	3.63912	0.635649	1.01293	0.126667
AP000936.1	5.04735	1.24622	7.37411	2.90996	3.95994	6.02777	0.856513	8.92043	1.18442	3.24891	6.21592	5.9697	2.06321	14.0302	21.1012	3.7324	3.53911	0.534504	3.90731	13.9431	3.79811	1.32101	1.09291	15.7395	3.39491	5.38756	5.36521	8.9687	5.46586	3.60296	2.33315	2.3635	6.93333		2.13373	2.25001	2.60668	1.58076	8.84068	9.60726	2.43323	10.7063	7.79928	6.61669	11.7032	6.38076	0.995417	5.66583
AP000974.1		0.00778431	0.0566313	0.0313009				0.0441678	0.0390047	0.109062	0.104302	0.106572			0.020804	0.0774308	0.301691	0.111608	0.197074	0.104486	0.0382051	0.113116	0.305887	0.0673874	0.0168653	0.074936	0.0816314	0.433187	0.327054	0.411282	0.270766	0.384698	0.201061	0.761509	0.716973	0.843287	0.0988662	0.160504	0.120404			0.00153082	0.328778	0.317123	0.105809	0.0334715	0.0455808	0.0940072
AP001029.1	0.197446	0.0662954		0.259935	3.53279e-05	5.06265e-11	0.766194	0.196974	0.444462	2.02706	0.941099	0.663853	0.394861		0.041442	0.92483	0.221252	0.0989458	0.695445	8.27168e-53	0.704134	0.474159	0.0865967	0.268531	0.459871	0.436364	0.494804	2.10127e-44	0.0214844	0.758619	0.472222	0.270509	0.175086	0.420441	0.275871	0.193012	0.0342272	2.54417e-22	0.563336	0.124928		0.584285	0.000756168	0.507986	0.191045	0.425519	5.0328e-22	0.329079
AP001062.7	0.124716	0.336586	0.499106	0.0242892			0.0839665	0.0918196	0.0677173	0.426412	0.415554	0.404038	0.69671	0.779232	0.518968	0.36398	0.447614	0.352926	0.0940964		0.0199178	0.0179629	0.0251166	0.0174765	0.0162304	0.023335	0.0679035	0.118207	0.11069	0.350776	0.0470443	0.0521759	0.0259834	0.323285	0.200027	0.21714	0.286353	0.132743	0.196718	0.0400074	0.0377896	0.0399879	0.0457972	0.0347758	0.135497	0.165508	0.0638632	0.1525
AP001258.4	1.24399	1.85294	3.1803	1.21968	2.16524	1.04045	1.71672	1.24476	1.31898	0.701241	1.90636	1.25228	2.74674	4.38408	2.67776	0.987587	0.873474	1.46398	1.03238	0.69592	2.53133	6.1008	5.7888	3.55471	2.23607	1.15281	3.81844	0.743807	1.44428	1.30036	3.5112	3.09651	4.42997	2.13722	2.03383	1.89976	1.24246	1.12831	0.197724	3.34316	1.29777	1.32913	2.54281	2.01716	3.06099	4.15934	7.10801	7.60663
AP001266.1	1.40675e-08	1.31362e-06	1.82545e-07	1.2058e-07	0.000160174	1.56511	8.42806e-07	0.109918	1.35155e-05	1.56145e-05	0.122978	4.96272e-06	0.757317	4.78003e-06	0.00428673	0.098803	5.86752e-08		9.51541e-07	7.14522e-07	2.52885e-07	1.13869e-06	7.91573e-08	2.17991e-07	7.43664e-08	8.1348e-09	7.37692e-06	6.50462e-08	6.0302e-08	0.300361	3.23378e-06	5.92603e-07	2.02193e-05	0.178364	0.299414	0.0209545	0.240989	2.50875e-08	1.32672e-07	7.13013e-05	1.54012e-07	2.52549e-07	1.35235e-08	6.26105e-08	2.1976e-06	5.70241e-07	0.263982	3.85351e-05
AP001347.6	2.67591e-07		0.246332	0.13052	0.902306	0.432948	0.684905	1.0931	2.15157	0.225426	0.313855	0.487329	4.00915	5.72943	4.79318	1.16644	1.52158	1.16933	3.89377	3.11808	2.7083	0.398969		0.487534				0.388632	0.237195	0.347447	0.344238	0.129224	5.43543e-07	0.130478	0.0891247	0.187234	2.82878	3.71342	2.75301	0.665698	0.414179	0.440367	0.698317	0.423998	0.177721	0.496225	0.286579	1.50312
AP001372.2	1.78935	1.73465	1.73836	0.83447	0.522823	0.739754	0.770754	0.673162	0.548587	1.74844	1.2916	1.34889	2.11497	1.80747	2.06126	0.344226	0.534769	0.814161	1.33001	1.39362	1.60177	2.1394	1.67168	2.14997	1.68522	2.16969	1.63299	1.13681	0.77899	0.872829	2.83795	2.29437	2.48577	0.843398	0.864331	1.01313	2.11507	2.65886	2.88377	0.467307	0.533595	0.595077	1.77765	2.00371	1.55345	0.462382	1.08589	0.378213
AP001429.1	1.18146	1.90235	1.09698	0.787175	0.574088	0.774208	0.911646	0.830625	0.282479	0.879293	0.818019	0.234459	1.56839	0.829429	2.23859	0.400634	3.87252	1.98084	0.748659		0.716713	0.256877	0.125063		1.15262		1.14517	0.378941	0.249626	0.563132		0.13036	0.125026	1.72109	0.262705	0.275524	0.891015	0.408676	1.74502	1.55781	2.90357	1.81441	2.30709	3.04184	2.24634		0.169063	0.156323
AP001468.1	0.890176	1.52619	0.156369	0.0528916	0.226816	0.201952	0.271347	0.0791726	1.77363e-64	0.431486	0.794337	1.01081	0.021191	0.333006	0.390017	0.791039	0.851935	0.406257	1.67952	6.76563e-28	0.090194	7.45921e-22	0.606425	0.00040047	0.407113	0.567374	0.217293	8.91975e-08	0.237695	0.555665	1.94342e-53	0.676453	0.281663	1.37607	0.152263	3.97312e-201	2.96006e-41	0.277979		0.987281	0.32964	0.684602	2.10408	0.113836	0.186472	2.94418e-37	0.0826894	1.80064e-11
AP001469.9	0.58698	0.302403	0.400401	0.171132	0.110919	0.453093	0.0982029	0.595792	0.339202	0.220584	0.295095	0.516583	0.111206	0.132557	0.352925	0.569534	0.467443	0.253455	0.159142	0.379802	0.740756	0.176415	0.195147	0.163555	0.32322	0.272741	0.257299	0.178301	0.0842044	0.136203	0.0364305	0.0405532	0.100907	0.461663	0.32	0.0887923	0.294788	0.253602	0.0834118	0.0660763	0.205753	0.155758	0.447988	0.628874	0.504303	0.324452	0.481991	0.0758775
AP001816.1	0.717661	1.39556	2.00604	0.51633	1.98812	0.90734	0.0655672	0.070749	0.587142	2.80078	0.97578	1.81506	1.75706	2.66272	2.4331	3.36197	2.14596	5.28322	0.973106	0.384762	0.944667	4.42829	2.31457	2.73262	0.766723	0.484354	1.10914	1.36666	1.03575	0.661968	4.0614	2.52307	1.50316	2.42458	3.22606	2.23404	1.65425	1.1314	2.21189	0.362905	0.406423	0.435349	0.209985	0.13183	0.480196	1.85916	1.9146	1.14769
AP003068.18	0.232055	0.536426	0.127826	0.0953961	0.130086	0.102866	0.919205	0.0897268	0.169784	0.0184644	0.0353151	0.652041	0.0372742	0.0370529	0.440117	0.0873871						1.28034	1.08566	1.38915	0.493174	0.549544	0.713479	0.308902	0.0498276	0.265822	0.46993	0.378912	0.686518	0.193338	0.124024	0.130334	0.182407	0.0978367	0.052414	0.0184548		0.0373156	0.607919	0.254284	0.308039		2.04683e-05
AP003068.23	1.35128	1.31345	0.391607	0.700867	0.879623	3.59738	1.50814	1.11552	1.86665	1.5273	2.11633	2.4352	0.870516		0.177315	0.981654	0.529099	0.494812	0.257059		0.169198	9.66729	9.34288	6.89356	5.84912	5.19988	4.47471	1.31132	0.829274	0.987349	1.79943	0.785205	1.78286	0.657511	1.81296	0.519701	0.66385	1.84754	0.918351	0.711202	0.422704	0.651772	2.37904	1.09572	2.54522		0.102698	0.377832
AP003419.11	3.24326e-09	2.26314	0.665301	0.681686	4.24876	9.61415	4.42918	5.17163	7.42957	9.42439	1.5142	3.11165	2.518	4.17464	1.70289	10.3039	8.02285	8.65118	3.01468	6.44529	4.04325	11.1076	4.36749	1.11477e-11	3.98287e-06	3.50064e-13	3.61451e-18	0.00130449	2.33065	5.18515	18.6147	16.9388	25.7146	9.7102	16.0244	8.22828	11.7171	6.82809	7.90936e-08	5.74594	4.09584	0.277852	1.37968e-23	3.17898e-20	0.00140705	0.00434628	23.2462	3.03578
AP003733.1		0.287234	0.224016	0.708717	0.410193	0.205605	0.264912	0.324017	0.376744	0.0744005	0.0708641	0.0309422	0.373433	0.406768		0.105036			0.399683	0.389073	0.116003	0.330015	0.196585	0.379266	0.16059	0.275696	0.132982	0.23268	0.531045	0.340762	0.0913864		0.302851	0.547071	0.0706633	0.0742354	0.0330382	0.033098	0.385356	0.0369929	0.310929		0.715654	0.609269	0.809468	0.23796	0.115116	0.0422714
AP006222.1	0.409391	2.33634	0.815436	1.19902	1.66989	1.03171	1.77605	1.08314	3.57661	1.28315	1.82659	0.293838	0.377868	0.716572	0.195054	0.310144	0.149356	1.07261	1.16974	0.0971795	1.90529	3.74488	3.25153	1.80288	0.805349	1.28522	0.817443	2.20211	1.07485	0.244504	1.11512	0.826901	0.790204	0.227903	0.0171792	0.827468	0.123702	0.41209	0.212394	0.00191037	0.0518917	4.98284e-09	0.0561547	0.426744	0.324758	0.341413	0.972711	3.53175
AP006222.2	1.66776	0.496144	0.735834	0.225884	0.344707	0.420334	1.34376	1.14597	0.92477	1.09501	0.429146	1.36832	1.16856	0.524429	0.93681	0.332428	0.22555	0.301143	0.148002	0.861787	0.157348	0.153842	0.308602	0.520312	0.589025	0.842668	0.496345	0.647529	0.782941	0.542378	0.290811	0.241902	0.246178	0.447802	0.452077	0.318782	0.103994	0.0940892	0.0375706	0.791285	0.494635	0.64655	0.258406	0.266566	0.313935	0.593169	0.712836	0.596674
AP006621.1		0.625992	0.611376	0.274785	0.204866	0.928637	0.1843	0.494117	0.407209	0.310919	1.07061		0.408259	0.0997424	0.114861	2.39054	1.25058	0.3813	0.089958			0.273804	0.716275	0.576348	0.360577		0.0910288	0.452899	0.269623	0.407173	0.0818651		0.0904351	0.527946	0.0949975	0.39877	1.08946	0.757803		1.61998	0.849991	0.100624	0.584338	0.182805	0.666363	0.646059	0.614055	0.906401
AP006621.5	1.33394	2.25559	3.10185	1.96483	1.03648	3.38179	2.73589	1.53737	2.01328	1.61395	1.48364	1.24651	1.48425	1.9826	0.47069	0.319374	0.415724	0.07211	1.71901	0.248667	2.55143	4.34992	3.79266	0.800972	1.66369	1.87684	0.363955	1.63711	1.1796	0.836532	1.2029	0.714804	1.42609	0.653828	0.916981	0.959168	2.72999	5.33407	2.66328	1.17175	1.82579	0.445609	1.2606	1.04448	0.799851	3.83925	2.40127	4.10113
AP1AR	13.3659	11.632	11.6497	12.2226	9.68338	10.5092	7.39801	6.72347	6.86058	9.65189	9.06834	11.4071	12.7533	11.4368	13.6498	7.3866	8.53754	10.7632	16.9954	17.2609	18.328	17.8832	17.7143	21.5012	11.4786	12.3161	9.80969	7.11179	6.57273	5.93499	15.2963	17.0524	16.0085	7.35894	6.90601	8.19814	7.7591	9.49672	12.6563	8.25493	9.25972	10.5464	9.07926	7.85558	9.08406	7.37441	6.73908	7.12477
AP1B1	12.7548	27.3173	28.2766	13.8613	24.4368	25.0729	20.4563	26.3242	23.4564	41.7886	39.0219	31.0337	21.0741	20.6004	19.6426	45.3891	35.9113	38.7056	43.2781	42.0924	25.5263	27.5663	17.9716	11.4005	21.5836	16.6275	34.6574	15.4602	16.3839	21.2772	51.3639	50.1719	48.5731	19.6795	20.5478	15.7968	18.7148	15.9997	7.51254	30.7635	20.0253	15.9248	6.00147	5.33513	10.5697	18.5697	25.7482	24.094
AP1G1	118.447	104.697	100.042	27.3744	21.7723	20.0225	33.4369	33.4887	24.9845	33.2719	32.839	31.8873	28.709	29.0262	26.0814	41.3487	45.5145	50.0085	25.3522	27.2732	23.8855	58.6643	66.2295	63.5405	67.1425	66.0011	52.5838	59.5828	57.8406	49.1643	50.3529	52.4867	55.2065	53.1978	56.9891	58.9044	22.0689	26.7303	25.503	18.1722	23.1203	19.9327	41.74	30.6314	32.2146	47.9546	53.7229	42.2458
AP1G2	14.284	19.2439	21.7238	0.794059	1.55992	1.55253	6.31802	9.12396	8.0874	24.9303	24.0765	17.5032	11.5161	8.24367	11.0938	16.6772	18.654	10.9629	6.73755	9.87225	8.07269	33.6918	25.4321	20.1923	17.463	12.3841	19.7678	13.3577	12.7292	13.4678	16.8379	15.32	17.0825	34.1256	26.6249	16.4854	3.54534	2.89136	2.36636	36.9381	19.3196	18.8191	10.4398	6.71391	12.0356	4.65291	6.07261	5.93521
AP1M1	10.4386	10.9956	14.488	27.0759	29.9659	31.2875	26.7423	25.0909	25.4476	18.9616	20.7428	14.6649	23.7771	25.641	35.8028	18.3674	16.2145	14.2338	8.42728	16.6114	12.7369	11.4852	18.195	7.96946	16.9345	11.4943	13.0081	13.2342	18.7807	12.3399	13.1973	17.7897	12.1019	10.9125	14.1688	10.3601	32.4057	32.9239	29.6566	10.4699	5.75681	9.164	5.58832	9.20846	4.63813	17.7015	15.9448	13.5114
AP1M2	48.0407	61.1859	59.5445	3.4528	4.02003	5.02712	4.8492	4.95377	4.60065	46.6256	40.579	36.3547	76.0323	71.3825	64.0049	62.3331	54.1103	58.6819	36.7512	41.6723	26.8554	70.0493	55.7536	40.0958	21.9319	17.5616	23.2355	1.11436	0.416006	1.71988	102.507	100.755	90.1064	84.8674	82.5866	68.5158	0.0723165	0.148018		38.7607	35.1147	27.9793	27.0652	15.8027	33.557	49.478	53.7158	51.2418
AP1S1	122.52	123.942	109.584	86.5989	75.3677	72.2169	43.5898	55.2784	41.2844	29.5631	24.3924	27.407	49.6378	58.8178	53.3065	12.2596	11.656	16.2117	84.3161	91.1119	77.8258	42.3065	47.9814	36.5847	60.0572	53.0873	48.7207	24.3359	20.6129	25.9251	74.1361	80.4808	65.086	92.0649	102.075	84.6039	56.3723	68.9942	56.7046	33.5252	31.4905	28.5077	37.5396	20.5667	34.9745	54.473	57.8598	46.3937
AP1S2	5.88883	4.59424	5.72232	15.5305	11.1394	12.2917	50.9523	48.7426	48.1812	7.75586	7.27316	9.6377	6.44459	6.06825	6.80548	5.74556	4.39844	3.75723	7.6383	9.00088	7.88667	8.6617	7.1994	8.41561	10.5479	10.6458	9.80121	7.40651	6.51645	3.97742	3.40608	4.60551	4.13444	5.4222	6.39547	5.5532	13.4356	15.8472	18.0048	1.12957	2.22442	2.72293	7.86472	6.44508	7.52984	29.3128	33.5991	24.4116
AP1S3	8.37277	12.9436	8.47761	2.08115	2.10502	1.36999	8.57209	3.47274	5.18994	14.4198	16.8986	15.9219	3.22387	3.10622	3.81952	11.8699	10.5589	8.75168	3.26033	5.04282	3.96138	10.3469	10.1791	15.8073	22.0996	23.3666	20.6967	14.9304	12.746	12.8583	7.20347	7.25616	7.95581	14.1479	14.8486	18.3511	5.46976	4.97654	3.42931	10.2355	12.5954	11.5315	4.1932	3.76745	4.58522	4.73128	7.78856	4.62368
AP2A1	4.04419	8.48141	8.80389	4.66658	11.7339	13.454	7.41764	11.7263	10.7018	19.2831	14.5253	11.136	16.132	10.8582	12.592	15.1962	9.44089	11.539	4.42045	3.88077	2.53563	8.67253	5.63329	4.74663	6.03621	5.05806	10.0131	5.70362	5.91655	11.1932	13.4864	12.0684	17.6898	11.6979	9.84837	8.5432	10.3914	5.34953	2.76279	17.8933	8.01332	9.72396	2.74868	1.25083	2.59016	3.18931	6.42782	4.90676
AP2A2	25.8262	27.784	28.4972	9.78998	11.6989	11.8727	30.2945	29.9212	34.4782	12.7429	12.3153	11.9481	11.1619	9.58857	8.65399	12.0967	10.6007	9.89767	12.1945	9.97107	7.9818	9.94431	12.2477	11.147	14.7664	10.0247	18.2487	10.6949	6.19639	12.5442	6.96085	10.0839	9.0294	8.67634	9.1101	6.90908	15.8598	11.5295	24.1431	10.5045	11.4122	7.50787	7.50101	9.50316	4.864	5.15087	5.39229	5.32365
AP2B1	26.1606	19.6491	17.9344	32.5141	24.1352	22.603	30.5857	27.411	29.4517	80.3005	74.3245	80.424	17.7531	16.4752	16.5699	17.5315	17.8586	21.094	29.4718	30.0577	29.0362	28.9577	31.6882	32.3567	71.2835	66.9665	52.171	65.898	66.064	53.623	7.85995	8.18755	8.25745	15.2981	16.7537	14.9739	31.4272	36.0988	35.6133	8.15745	9.7748	8.9715	13.8323	11.3959	12.8638	45.5556	42.8513	35.4566
AP2M1	148.572	176.41	159.965	139.596	144.684	137.972	84.567	91.8486	81.6072	175.808	152.482	146.694	89.8678	86.0206	80.9058	82.8871	76.5157	111.786	217.638	232.047	181.512	366.781	311.379	246.307	153.995	125.799	151.615	198.63	200.575	188.654	336.264	325.972	296.203	104.785	108.023	86.4682	205.823	254.282	183.279	132.853	136.805	113.042	65.5042	58.7902	71.3714	280.952	256.45	265.926
AP2S1	139.976	131.49	131.256	93.4686	92.2763	90.5268	62.1396	77.5302	65.401	150.164	120.724	109.739	56.5093	48.4954	39.6683	61.0942	47.449	68.5056	103.731	83.4052	86.3452	94.337	75.4624	58.8436	85.8253	71.8042	72.9913	77.1332	66.3156	63.1723	119.043	101.923	101.046	42.742	53.2062	36.2498	33.162	28.7037	30.1657	68.6741	66.1751	59.3503	39.7891	12.3306	17.8415	106.907	108.151	101.695
AP3B1	40.4489	28.8765	26.9988	70.1447	45.4046	43.438	32.7549	30.6619	29.939	25.9779	24.4688	22.4997	22.6528	22.9796	25.8756	18.6735	22.0556	21.0202	44.1758	35.7636	33.8982	21.7699	21.9393	23.6469	28.437	28.0049	31.18	24.8656	28.7394	22.8389	30.2171	31.0956	26.718	18.18	20.1477	20.3093	23.665	22.8415	28.2037	15.8645	18.0223	17.7142	8.71663	7.02206	7.39568	25.714	23.5344	19.8574
AP3B2	0.94626	1.66829	1.0364	0.437408	0.405127	0.373276	0.600141	0.357606	0.0678886	0.666834	1.40885	0.657538	2.34238	2.2824	3.44693	0.122535	0.276182	0.280617	3.74336	3.92799	3.87075	0.324939	0.731059	0.241044	0.384765	0.0660779	0.0435954	2.27956	1.0854	3.35749				0.856216	0.696807	0.638997	0.762211	0.397658	1.75579	0.206916		0.067716	1.30138	1.09186	0.790882	0.0308425
AP3D1	13.5719	15.6477	22.4031	11.2298	19.8703	18.7152	29.0809	33.8331	34.5112	18.8052	16.2883	14.737	18.3911	19.2743	19.7084	38.8582	34.1296	39.3194	20.2254	18.9035	17.1212	15.5426	8.36658	7.91879	18.7423	14.1957	30.2502	19.9644	19.9771	31.0658	15.2627	17.4367	15.9574	6.57158	8.66902	4.99607	12.9646	13.4983	7.66668	15.7573	10.5266	9.88132	5.84556	4.14897	8.56053	8.66228	11.7701	8.93168
AP3M1	32.3266	26.6374	25.867	36.0382	28.2671	26.7078	29.6532	25.504	27.016	21.9203	23.1117	26.4513	38.7698	37.5754	42.1404	14.5453	13.6033	16.7713	14.3127	14.2395	14.1118	18.0411	17.1134	18.7151	20.8976	21.9299	17.856	25.4416	27.2221	22.3754	13.5409	14.1483	12.9479	16.4858	17.862	20.6399	18.4279	20.7364	23.1214	39.0411	45.2475	42.9865	17.8441	15.5877	16.48	46.7668	47.4602	38.9373
AP3M2	14.7359	12.5359	13.3235	13.2387	10.9309	8.79066	12.6368	11.6307	11.4651	6.3869	7.74115	8.44205	3.36414	4.04926	4.04065	6.56	7.04822	8.1145	14.0531	19.6427	19.3446	10.6075	10.1444	10.1792	26.8793	24.2324	21.098	11.2463	9.72665	8.98832	0.758647	1.49798	0.578689	4.21745	4.74607	4.85757	9.93411	13.2708	11.3212	1.56325	3.66802	3.19246	15.6272	15.8663	15.3119	12.466	11.97	8.52512
AP3S1	40.8222	33.0347	29.052	52.5155	42.9295	47.5445	54.1798	50.5286	45.851	25.1387	21.9055	20.6867	17.574	23.4558	20.0751	17.7549	18.0282	22.5192	52.4261	50.6347	55.9626	29.8864	28.6072	28.5175	68.8	75.6772	57.8265	56.2	51.3166	46.0043	58.3693	52.9976	45.3722	28.5826	26.6559	33.5032	27.9725	34.4593	32.4335	8.2451	7.52977	9.58497	16.0471	12.2458	11.6314	29.8318	31.2135	23.1515
AP3S2	128.255	84.8282	77.7224	46.5467	39.8564	19.9495	43.8502	33.7267	32.3867	45.6499	44.9484	40.8489	23.1238	23.5758	20.4392	27.5078	33.7423	45.8175	45.0437	38.7751	54.2397	44.5912	42.3334	57.8094	54.1687	52.6048	48.0819	63.5653	58.9297	41.2826	34.1102	41.249	43.1229	57.0973	50.2892	48.9327	35.5337	49.4653	41.4406	42.4257	51.1391	53.2716	50.0671	36.8324	30.0547	72.1729	66.5604	53.972
AP4B1	17.7944	15.5276	13.0361	12.2149	8.75375	8.76602	4.20305	3.54298	5.82953	5.07941	5.96908	5.89864	1.30729	1.75861	1.61622	3.8177	4.5659	3.36033	3.525	3.35854	4.43314	5.75306	4.57681	4.65545	7.86155	7.06856	4.38365	11.0782	11.2232	8.11385	13.8093	15.5347	12.5759	12.815	14.0513	14.3902	8.39529	11.3048	10.3258	5.31033	7.0217	4.73576	12.4443	9.61071	8.76196	6.52122	4.49822	3.95072
AP4E1	10.2569	8.64691	7.56573	6.71955	5.04881	4.72013	4.90047	3.59488	3.87594	4.11841	4.75469	4.74938	4.57283	4.67006	5.1967	2.66513	3.13436	3.18689	5.63177	4.74819	5.61459	7.83126	8.83678	8.40859	8.76145	9.89993	8.50622	4.73441	4.67648	3.79338	6.76635	6.5524	5.59335	15.5079	15.7694	15.0391	6.6439	7.86953	8.68355	2.88741	3.33334	3.50941	4.90743	4.96179	5.38861	6.29398	7.22468	5.6015
AP4M1	6.80371	6.85181	8.44335	15.9804	13.23	12.6738	12.1368	12.2819	7.68248	7.15166	4.66054	6.04264	17.9055	18.3885	15.7222	4.23639	3.14941	5.94261	12.4266	14.7163	13.3947	5.91716	2.03202	2.15058	8.32926	3.02835	2.76629	7.56073	3.29279	3.73032	9.852	10.9852	8.89628	11.4653	9.35958	10.8571	11.9681	10.1905	4.43791	15.3701	13.4693	6.26386	4.23675	5.34313	4.18494	9.54438	12.6662	10.8599
AP4S1	4.76551	5.47245	5.79247	6.13379	3.398	4.18022	4.00451	3.40687	4.75493	6.16897	4.0185	8.17546	1.93278	3.35305	2.47991	1.13447	1.93881	3.12104	1.99073	2.6093	2.44329	9.69982	11.7264	11.5005	15.4101	12.3475	10.0059	12.035	14.0661	13.0589	2.00332	2.39562	3.07227	4.6358	4.69897	4.9233	4.23098	3.37318	2.37985	1.0873	1.68983	1.82888	3.3042	1.68217	3.02306	2.18862	2.486	1.73284
AP5B1	0.76885	1.1974	1.07476	0.902722	2.44612	1.66298	2.09953	2.61232	2.69849	0.763192	0.49951	0.370653	2.94326	2.15489	2.08287	0.311534	0.189056	0.138984	0.892894	1.08472	0.654242	1.27543	0.911405	0.966702	0.503579	0.755617	1.0767	0.895197	1.10325	1.65853	1.0866	0.899685	1.28603	2.17874	1.9075	1.34967	1.81279	1.01445	0.514838	0.739343	0.333522	0.266907	0.585112	0.336394	0.455174	0.462428	0.843286	1.39199
AP5M1	30.1098	31.6791	23.3775	18.6214	15.5588	16.5319	20.8955	16.2213	16.0704	29.0125	25.3943	30.0898	16.4257	15.9439	17.6451	13.2358	14.1028	14.1105	15.1491	15.1463	14.6106	25.3705	30.3374	32.0457	25.456	25.6859	21.019	26.9058	25.1633	21.6416	15.963	19.3746	14.7073	11.7562	13.2013	11.3247	13.8441	18.078	17.2721	18.8334	24.8086	24.6615	30.1447	23.4441	26.1071	17.1777	16.6167	14.7424
AP5S1	4.02036	7.07843	7.74323	4.44928	7.89597	7.31543	3.15126	4.27479	3.76561	5.57646	5.1013	3.9081	4.32709	3.97814	3.84138	6.58385	5.24066	4.67051	13.7118	11.9172	7.82276	9.65372	6.82822	4.19248	2.59954	2.00056	3.82816	5.77167	6.68837	7.76502	4.13079	4.57857	4.15988	7.63418	7.55305	4.54247	9.64983	7.74301	4.67981	9.18786	4.9042	5.6735	2.01139	0.814034	2.76589	2.35931	3.25958	3.64813
AP5Z1	0.519222	1.15244	1.98566	0.628974	3.80468	4.96275	0.595202	1.19253	1.06215	1.29453	1.42863	1.04282	3.76127	1.84791	2.05229	7.06745	3.31373	2.23776	1.32251	0.823013	0.22916	1.20537	0.586153	0.367053	0.398404	0.531983	0.931347	0.405897	0.369849	1.13846	2.62407	1.82441	3.27905	3.9952	2.49854	1.72945	4.38389	1.11201	0.439819	4.27589	1.53208	1.10215	0.261014	0.263575	0.792373	0.551597	1.61586	1.81011
APAF1	9.74081	6.12896	6.35895	13.2821	8.4388	8.81725	18.6582	13.6821	12.8493	2.76973	2.33313	3.05929	8.50929	11.6323	10.5243	4.84473	5.05759	5.13552	7.89158	10.6084	8.3719	5.75543	8.78269	8.34521	5.28099	6.18598	4.29891	6.03702	7.29876	6.62126	8.73401	9.86395	7.89163	5.42999	4.8303	4.43713	8.73394	9.90634	11.0444	2.54559	2.15148	2.70382	12.9251	9.37252	7.17468	8.40836	5.73419	4.00483
APBA1	0.237828	0.447158	0.299112	0.00527473			15.451	14.4123	9.0873	0.504175	0.925273	0.635892	0.211766	0.198635	0.788551	0.0292086	0.0417644	0.0474781	1.42657	0.85234	0.696247	0.0218935	0.376854	0.0968742	0.37166	0.503205	0.0609409	1.41178	0.25023	0.286461	1.06262	2.32816	1.11706	1.54719	0.507727	0.13736	0.0219846	0.00540336	0.0175083	0.315497	0.299602	0.318735			0.0235986		0.00777254
APBA3	0.707189	3.49552	2.54143	0.612694	5.01037	4.93922	2.1209	4.18114	3.31884	6.44815	4.4522	3.96219	5.87121	4.97857	3.91877	6.33795	4.36404	2.64038	2.19389	2.47524	0.856477	2.77722	0.76457	0.183139	0.619611	0.583085	1.05757	1.1232	1.66255	2.25815	1.11673	1.22362	2.35037	3.84977	3.36894	2.70087	9.19343	3.33776	0.696685	3.66617	0.890178	1.02609	0.468898	0.422784	0.609449	1.0714	2.67074	1.35846
APBB1	0.605047	1.2274	1.11897	5.139	9.55618	8.75636	0.45669	0.493832	0.887017	15.7635	12.4267	10.7296	2.93741	3.44136	3.03249	0.435046	0.391725	0.480244	5.64205	4.61733	3.10151	2.624	1.85706	0.759676	0.226213	0.135514	0.641713	4.08311	3.88944	4.92531	0.190517		0.223348		0.0471969		11.0065	8.54694	5.47095	0.826123	0.48277	0.585529	0.703339	0.480252	1.13327	1.03657	1.08896	1.01927
APBB2	5.89352	8.21466	6.80547	18.6306	14.9485	12.1982	41.9052	35.6984	40.553	13.0776	13.1899	12.6758	7.29177	7.6983	7.47687	15.1139	15.5463	16.0318	5.33894	9.67291	6.16666	28.5433	31.2746	29.8057	8.73281	7.33303	9.17882	4.92731	5.29396	4.97974	12.4239	12.7548	8.5372	56.4654	45.7782	42.6777	8.59321	7.64621	8.17495	9.19586	7.58469	4.86984	5.84315	9.19471	5.59405	22.5069	18.1978	15.143
APBB3	1.15904	0.884558	1.4554	1.68909	3.58872	3.25641	3.36834	2.82359	3.26054	1.60541	0.831432	2.19619	1.28163	3.3731	0.695144	2.44084	2.36295	1.45139	1.79126	1.96502	0.698606	2.60725	1.90927	1.05717	0.71777	0.634149	1.55375	1.32152	1.88578	2.87463	3.52826	3.05133	2.94478	5.43881	3.60988	2.73772	6.03825	3.77936	2.89743	5.59046	3.81692	3.02523	3.52148	1.50678	3.87813	2.78957	5.23888	2.16646
APC	5.95996	6.44154	6.44706	16.0591	14.6071	13.9187	14.125	9.52161	7.51585	8.16314	4.45104	5.02475	7.23918	9.39383	7.38034	7.65536	7.96556	10.3099	8.22702	9.156	10.2661	8.18806	9.03754	9.68069	13.2269	14.2411	13.1098	14.1312	13.4989	11.8089	8.44495	8.33232	8.77729	7.70421	6.69424	7.86658	9.72037	10.0512	10.7782	6.98653	6.48739	5.26734	5.7435	4.66621	3.8406	9.23836	8.30627	6.91618
APEH	101.875	119.186	89.1403	60.5393	61.0066	62.2722	71.7473	69.7901	66.0438	54.7055	44.196	41.6328	20.2445	21.8482	19.8817	50.3875	52.2758	61.8499	30.4225	27.4404	21.0274	115.16	101.663	66.7927	88.7119	68.8824	78.0787	36.3215	35.8817	27.6616	51.6121	40.2958	43.8032	33.1385	34.8781	27.8013	21.4635	27.2459	15.7319	82.7989	81.3064	63.9174	29.571	21.4555	30.7862	71.3941	80.3125	65.5852
APEX1	65.0085	59.9843	55.3045	70.2119	70.7422	79.9357	89.1214	100.707	72.7	70.5513	67.8231	62.6491	66.7808	60.6366	62.9048	28.555	26.1965	29.9823	38.1117	44.9068	35.7378	103.159	101.812	87.6063	83.2511	67.9174	70.7546	24.8682	30.4418	26.4596	51.8182	56.7165	49.426	71.3323	71.5857	69.6563	58.6818	53.7997	50.8257	54.1122	46.4085	44.8862	30.9126	19.2321	28.8288	24.9247	27.6879	22.7727
APEX2	9.33997	10.5518	9.65769	13.5425	15.8666	15.804	7.64481	8.13859	6.59751	6.55478	5.32726	6.07809	12.6487	10.0627	11.6381	4.96875	4.38082	5.32729	8.66185	11.1733	5.14225	7.55599	6.1361	5.18082	10.9818	9.96639	12.3641	4.8683	5.75476	5.04502	7.30681	6.05707	5.94359	5.76454	5.7479	4.30467	4.45841	5.54696	3.17571	9.3519	9.35172	6.96127	10.1429	5.6475	10.955	9.68617	11.6236	7.78723
APH1A	30.4864	32.8908	30.6327	35.1176	40.0862	35.1847	19.7948	26.1556	22.7451	52.383	37.8093	42.4359	85.696	84.8285	73.05	19.2022	15.6646	17.3103	28.6467	32.6303	21.4285	29.2146	24.1731	19.4423	64.4195	49.2078	55.6755	48.3372	45.2698	42.7985	75.041	71.423	58.725	34.9749	42.0263	31.611	19.7106	20.1997	16.6782	11.8188	8.72755	7.1871	16.6389	12.9092	17.4583	59.6475	66.336	56.2735
APH1B	7.89687	8.8712	5.50714	8.22881	6.87001	6.5776	3.44724	3.60037	3.24794	2.84233	4.18122	2.21207	0.46081	0.26732	0.146657	0.558394	1.15335	2.50147	6.11617	6.22788	4.47813	2.20062	2.86116	2.48525	1.12119	1.42583	1.97677	5.81624	5.10314	4.61041	5.65914	4.95039	3.17242	3.70019	5.84166	4.227	6.94281	8.59771	7.53015	1.32449	0.719888	1.08168	3.56507	1.73218	2.61922	7.17905	4.94191	4.3101
API5	48.4188	41.982	40.8839	33.9273	25.5847	24.2692	53.5604	48.5651	45.8937	27.9803	24.9641	27.634	67.6237	69.6802	71.4555	31.2654	33.6878	32.8957	41.3577	39.7413	38.9612	36.3671	40.0363	40.2455	37.5473	40.9941	33.583	25.7683	27.7248	23.5094	19.9695	22.6092	22.8055	19.1708	19.6807	22.4965	32.3359	36.9402	35.9065	19.3518	27.4569	27.088	69.4753	55.2795	66.64	42.0131	42.1745	36.2179
API5P1	4.40853	2.88444	3.58099	2.44535	1.66494	2.67734	4.04361	3.80098	4.86526	1.82924	1.98117	1.68004	4.40151	5.9201	6.38255	1.63717	1.62088	3.47258	3.61934	4.90557	4.51173	3.05512	3.35119	4.36782	3.18324	3.79287	3.10837	2.09599	2.5379	2.72302	1.33746	1.90492	1.37893	1.39714	1.72846	2.17302	2.59166	2.57283	3.58229	1.09634	1.52877	2.05536	6.4858	4.5412	6.0741	3.96198	2.56753	3.041
APIP	8.7991	9.41044	9.00027	25.6293	23.9505	22.7129	20.5678	19.0115	21.068	35.1203	34.7218	36.4876	11.4669	14.5214	12.9586	4.26553	4.41235	7.15029	18.918	16.7693	19.2594	17.8639	19.3599	20.7662	9.12977	13.816	10.5158	7.29181	6.61491	5.4697	6.74174	8.14576	5.83834	8.45523	7.39098	8.84308	18.8085	22.092	21.7848	5.70452	6.7455	6.08156	18.0367	14.7748	19.2261	23.0226	19.5343	21.8644
APITD1	21.9502	17.0928	17.0443	24.9154	19.3622	17.8126	20.4153	22.4362	16.1719	9.75626	9.17003	10.0827	7.80787	7.72906	4.55565	4.37705	6.773	6.8147	12.7381	13.2657	17.2789	10.0301	9.77457	9.84197	16.3329	16.6814	11.8574	13.4122	10.7003	9.95576	20.2458	23.0445	19.2588	5.3516	5.0089	5.52207	19.4121	19.5245	23.8969	7.15944	7.84477	8.13748	10.4054	8.97274	11.1623	12.6026	13.9425	10.7351
APITD1-CORT	0.133987	1.27582	0.0313232	2.29081e-18	0.371302	1.30532	0.19168	1.42816	0.629081	0.53239	0.330893	0.718291	0.564412	0.628869	3.02979e-06	0.285045	3.85099e-22	0.0795452	0.243213	0.203277	1.84454e-19	1.18623	0.29083	9.04352e-33	0.121263	2.8346e-27	0.0946122	0.361104	0.523119	0.208053	0.481787	0.251442	0.34526	0.0291818	0.743505	0.157548	1.51754	0.867687	0.266959	0.16306	0.385455	0.324642	1.35244e-15	0.0626699	0.174103	0.12568	0.297075	0.078263
APLF	2.12008	1.72734	1.82199	1.84937	1.81757	1.34193	0.565552	0.759752	1.00057	6.69485	6.32137	7.8512	4.44855	5.86835	4.2696	0.103753	0.0143456		2.17083	2.43677	2.24975	0.0861913	0.200638	0.208632	1.11852	1.41861	1.02681	0.361252	0.201733	0.13764				0.0387689	0.143072	0.142793	1.67291	2.43722	3.33513		0.0693731		1.61346	1.50131	1.11307	0.0534978	0.0531723	0.085469
APLP1	3.48987	3.19845	2.06729	6.56422	8.62845	5.1714	19.4511	18.3606	19.5003	0.816789	0.818931	1.00499		0.338643	0.150695	2.28494	1.50839	2.37568	12.5039	13.9354	11.2575	1.9707	2.08393	1.36097	1.68852	1.2776	3.74056	5.71707	5.43033	7.0464	0.791223	1.45574	2.71337	1.41697	0.812851	0.545499	33.5407	32.5449	23.9679	1.35335	2.01061	1.75903	1.31677	0.794888	1.2644	2.95675	2.1877	4.43047
APLP2	150.53	120.855	122.169	132.251	120.088	105.556	271.04	260.97	274.366	109.375	106.799	110.447	141.761	138.183	134.561	95.1118	87.1623	108.893	299.11	306.236	287.147	187.412	163.589	186.687	64.6617	62.4534	66.3568	71.3476	74.5977	80.3285	153.563	167.116	150.171	54.9959	53.8904	50.0801	29.3793	32.2586	25.8082	86.7165	86.7728	85.2379	69.0836	74.0038	68.4773	192.496	195.054	166.056
APMAP	22.0699	22.5936	21.7453	66.7423	57.3852	50.0775	44.1298	43.9912	41.734	34.922	27.6505	30.2092	18.1835	17.6975	16.5646	27.2911	25.6432	31.0475	113.851	118.945	107.103	39.6937	33.0155	30.2449	16.8948	17.1437	15.0931	86.1992	85.5405	75.471	36.8669	35.1772	31.4157	52.9145	56.1194	50.1071	33.2979	38.1372	32.433	32.8498	36.2827	29.8348	34.4255	29.6712	31.1647	44.5065	44.0283	37.3079
APOA1BP	117.903	114.433	96.8667	66.4208	60.2697	48.9027	53.8929	61.4158	53.6062	104.721	81.4533	97.1257	73.4337	69.3789	62.4782	19.4347	18.0294	23.2427	74.2748	76.1186	59.5406	162.946	145.18	131.625	113.299	97.3409	86.2326	91.8635	88.9868	72.4998	58.6016	58.9839	46.7149	37.4426	44.4239	31.3794	44.0758	52.8072	48.4415	51.7359	54.5052	48.3007	55.2561	39.6112	45.724	254.148	197.052	177.071
APOBEC3B	18.1774	19.5025	18.6648	21.9952	20.0597	23.8003	16.569	18.1969	14.4335	190.319	166.316	164.88	8.35654	7.39536	9.06583	4.98856	5.32532	4.14599	50.6313	52.0696	43.8607	32.2245	32.1528	26.4716	32.4556	28.4496	27.8478	0.0395675	0.0451502	0.109446	0.650587	0.36295	0.363913	7.69848	8.03918	6.26087	20.9661	26.3734	16.3528				7.82074	5.21015	8.03156	10.7579	13.9132	12.2717
APOBEC3D	0.554766	1.66954	0.548688	0.621641	0.413212	0.679928	0.250928	0.720381	0.359895	1.14808	0.354889	1.66339	0.193257	0.473998	0.217859		0.11813		0.296131	0.312282	0.84665	0.563844	0.628243	0.634773	0.520091	0.480513	0.41679		0.0734228			0.0760936	0.0860455	0.107093	0.176823	0.0735946	5.25568	4.69242	2.98539				0.14507	0.0156583	0.154977	0.137581	0.308216	0.0462376
APOBEC3F	1.31813	1.8148	1.63286	0.428668	2.22639	1.32443	0.935896	1.88081	2.69843	24.8564	34.7516	17.0681	1.65323	1.42639	2.42067	0.0977658	0.21921	0.13967	3.44282	3.21154	1.93936	3.58626	2.37719	2.42652	0.717443	1.07428	0.513296	1.48933	1.26167	2.95586	0.865646	0.286126	0.206477	0.214633	0.0780407	0.0617536	2.89322	2.14749	1.74142				0.676901	0.803531	0.379622	1.47448	2.45175	1.02757
APOC1	0.816113	0.609334	1.78387	5.34809	3.4165	0.512533	127.114	140.861	111.999	20.913	16.3794	13.8512	1.74312	4.44715	1.06099				6.18813	3.90597	1.87668	9.7727	7.20639	5.48384				12.143	12.6139	13.8509	3.57831	2.60651	3.012	1.30996	1.3831	1.0391	1.11749	0.936107	0.209525	0.567766	0.909849	0.22159	3.96973	1.77127	4.30802	2.4498	1.17229	1.46832
APOL1	2.50636	2.84361	2.57583	0.750655	0.347715	0.980515	3.68956	5.01409	5.46476	0.0151613		0.0334934	0.359062	0.922833	0.323051			0.0382491	1.59117	0.586821	0.924143	4.70736	4.28161	5.74902	2.05141	0.897141	1.44116	1.37899	0.968237	0.798193	12.8648	13.5908	14.8243	0.312608	0.232943	0.240925	5.73224	6.3267	5.38774	0.703032	0.192126	0.120947	0.0146991	0.0732531	0.396026	0.414617	0.631145	0.3658
APOL2	11.3774	13.5391	11.7777	16.2355	17.6232	15.143	5.36792	5.28206	4.41968	5.48368	6.42567	5.89206	2.12703	2.68865	2.00316	7.51972	5.26473	6.05624	7.57358	8.47479	7.3536	12.6599	10.5009	9.19307	12.1647	6.78931	10.1492	8.67301	9.33209	9.12588	8.62828	9.63711	7.19369	3.62718	2.78731	2.46342	11.295	16.0149	14.1347	12.9895	13.0929	10.7908	8.30562	6.43193	7.32598	6.13741	4.27655	3.5574
APOL3	0.501199	0.371683	0.425993	2.57992	2.82004	4.36882	0.460839		0.106287	0.0522259	0.385	0.240006	3.09098	2.50123	4.14424	0.0394012			0.0563847			7.93503	6.87728	10.4414	4.19692	3.99737	4.52471	1.35195	1.72944	2.17286	16.224	18.5651	10.5248	0.0362042		0.727268	4.2384	4.25927	4.40317	0.886307	0.586997	0.48807	0.241702	0.210124	0.404884		0.0130325
APOL6	9.5855	9.47645	8.38966	17.6837	15.1165	15.0738	0.539831	0.545247	0.643628	9.74445	8.83394	10.5456	10.4999	10.4555	9.85951	0.379209	0.205115	0.181376	14.9831	15.685	14.0845	24.5955	23.7669	25.4756	19.8759	20.4701	17.7683	9.41716	8.44632	8.04629	48.6588	49.6225	47.3723	0.174166	0.143732	0.174939	13.3343	14.2451	14.439	1.46355	1.71964	1.50007	6.14345	5.39779	6.39629	0.73501	0.769842	0.639126
APOLD1	1.1652	0.896149	1.07695	8.51996	6.83639	5.71831	1.72522	0.639472	1.34709	2.38773	1.9674	1.84919	13.0981	8.50908	7.85407	0.882684	1.00765	0.840824	0.783715	0.812354	0.576488	8.39322	7.75773	7.49011	0.696764	0.588055	1.08023	2.68378	2.51189	2.54721	4.0298	3.75026	3.56381	0.983471	1.05261	1.14861	1.34039	1.64502	1.25367	0.167663	0.811514	0.125156	2.02919	2.0454	1.88903	0.301228	0.227888	0.285059
APOO	16.0129	12.3387	11.5854	28.0437	20.7368	20.3047	24.0086	32.0679	21.4283	13.7629	8.69386	8.93046	3.8343	4.38603	3.15786	7.79847	7.72255	8.35506	16.5712	24.2749	15.4074	13.65	14.3143	24.9249	23.9056	29.0576	21.466	6.52156	5.97892	4.34782	22.4256	17.1642	18.3284	4.11303	4.9971	8.16251	29.5046	34.3634	36.9715	14.9116	11.9277	9.8108	25.6121	21.4886	23.111	25.5041	26.8687	26.7086
APOOL	5.65165	5.89773	6.77973	8.01594	5.57247	4.97955	9.42391	5.26935	8.01884	12.4149	13.4546	15.548	10.5485	9.34637	8.54324	9.8899	9.97702	11.1051	8.53772	9.23015	10.2077	4.22262	4.25865	3.98852	9.76627	9.45433	8.25136	10.9879	10.3592	10.6153	8.41577	9.51603	8.05698	6.85063	7.15817	8.35546	4.80183	4.88089	4.05165	10.8662	14.7797	12.1423	9.11837	9.9407	7.49106	5.7575	5.70041	4.19539
APOPT1	23.8397	19.1296	18.2795	15.9773	15.905	22.5354	14.8697	13.2141	13.0706	31.4564	26.8067	29.2532	17.5805	21.1615	19.6451	8.01089	8.23216	9.95388	10.7109	8.28212	12.9732	30.2666	29.7238	29.435	11.6515	11.233	14.253	22.7856	22.4412	24.5558	18.4638	17.3135	18.0834	16.8165	15.6814	13.9232	29.4608	24.7948	34.6591	13.6872	12.4883	12.4308	10.3757	5.26859	8.97095	15.4878	18.775	17.5661
APP	179.364	163.026	153.68	149.342	126.61	110.033	142.504	133.439	129.201	196.523	203.289	188.843	218.26	219.55	186.268	203.647	194.12	237.715	431.004	466.839	482.542	138.848	140.36	140.857	188.473	175.555	179.886	292.592	308.661	286.115	370.683	399.393	359.985	68.6361	70.3609	63.0784	165.7	177.138	191.909	133.548	143.621	130.979	156.761	138.537	155.242	146.306	141.616	126.545
APPBP2	17.0999	12.8775	17.8169	16.423	12.3953	11.8667	16.6372	13.8095	16.8965	12.0567	10.6449	12.317	14.7332	15.6989	15.2615	10.653	11.1258	12.7569	12.1032	14.2697	9.2787	15.5643	17.9814	16.6402	16.0527	14.2279	11.6805	24.9684	23.2392	20.461	10.5423	10.6635	8.76757	238.605	248.184	274.493	37.1539	44.4176	50.1191	3.29928	3.03111	5.59906	7.98674	5.85644	4.68316	22.384	24.5669	17.9365
APPL1	31.4561	28.7621	30.1988	20.5567	16.2206	16.1787	17.7944	15.6227	16.8505	24.0178	24.5623	28.9604	21.1548	22.5859	21.2176	23.2345	22.927	31.066	26.027	22.5466	23.4838	26.8956	28.1361	29.3761	28.5428	28.2127	24.3965	11.8739	13.2002	12.1115	18.4545	17.2427	16.9489	8.16957	8.61805	10.7527	7.88901	9.02052	10.2373	15.0233	16.6477	16.8269	12.0345	11.4844	12.3591	20.3554	17.0167	18.2323
APPL2	12.6921	11.1355	11.3836	4.01749	4.59733	2.7629	16.7021	14.4357	13.4294	9.57114	8.39927	10.4841	5.74094	5.08749	4.01106	8.56801	10.1873	8.18074	10.9181	12.8692	12.0677	6.88098	5.30284	6.81506	6.51072	6.88482	5.96957	7.10988	6.6924	5.67657	11.7747	12.1253	10.708	11.6317	11.2648	13.5968	8.33878	8.64785	9.86006	5.27058	7.74768	6.19629	9.65833	10.6746	7.26994	13.0205	11.4269	9.22362
APRT	38.8044	96.174	102.63	22.6678	57.6823	54.0915	77.6806	110.668	99.2928	115.41	84.8001	87.7768	29.2608	31.5611	23.0462	20.6102	14.3859	15.4803	28.0546	27.1664	14.6576	114.509	86.3462	44.507	46.9674	32.5801	76.8448	56.6869	62.085	82.769	98.4021	78.5212	91.7114	93.2737	95.6367	51.9022	26.7376	17.2102	6.85958	26.547	13.0821	11.9514	21.0486	13.952	43.0954	100.056	96.819	122.797
APTX	45.4423	35.6356	31.3457	43.5563	33.1724	34.4462	17.5745	21.9904	17.2756	28.2773	22.2041	21.8906	18.315	21.4258	12.3236	9.44792	10.4146	7.02397	21.54	19.1937	19.7265	38.2132	32.8554	36.7953	24.1602	21.4898	17.546	17.5423	16.5144	12.6173	30.8779	33.4488	29.0997	10.8636	9.03777	7.99565	16.5871	20.1628	16.643	9.55566	16.1625	12.0534	17.1988	13.1985	16.815	25.6407	22.8154	19.8878
AQP1	0.0246912	0.074331	0.060095	0.0074708	0.0174737	0.00806185	8.3379	8.06545	7.89295	12.8325	8.82905	11.2003	1.01755	0.592175	0.7195				0.0392228	0.0977265	0.0273754	0.55611	0.599735	0.394153	0.0747685	0.057251	0.202724	0.070265	0.168134	0.0178605	0.651929	0.64892	0.533452	0.0226513	0.239232	0.0087566	0.10866	0.0617155	0.073931	0.287143	0.32426	0.114069	0.146576	0.0239169	0.097238	0.429832	0.0871035	0.109775
AQP11	0.644772	1.26268	0.406632	0.158535	0.173457	0.228043	0.418671	0.595792	0.626058	0.580183	0.395439	0.25663	0.639299	0.0819674	0.327279	0.251406	0.275486	0.215498	1.71589	2.42647	2.0572	0.363395	0.25333	0.322106	0.616277	0.202241	0.404785	0.202107	0.665038	0.188994		0.0376968	0.0373898	1.26164	0.920976	1.13254	0.674133	0.517158	0.469016	0.163374		0.0206379	0.17804		0.117328	0.376111	0.489783	0.516193
AQP3	0.721891	2.12272	1.46074	0.0269068	0.182726	0.0862456		0.0236427	0.0993005	4.32169	2.0939	3.40698	10.6034	8.94359	7.83717		0.0597179	0.0593417			0.194821	73.7943	58.7146	40.1382	8.32022	5.69201	9.84905	0.43722	0.633809	0.375479	14.5014	13.7669	14.77	10.5831	9.61172	6.51215	0.390458	0.360777	0.293603	87.2334	45.2295	43.9737	0.753238	1.04897	1.12571	1.07394	1.23178	1.08781
AQR	32.7854	29.5211	23.8866	14.9427	12.1032	12.0628	26.9582	24.6742	25.076	21.0098	19.6083	20.4014	12.1156	13.7999	12.6542	7.22945	9.70598	7.93133	16.338	16.9073	16.8721	21.3126	21.2144	24.7723	22.869	22.2661	19.68	16.7984	16.7813	15.403	15.1438	15.2043	13.916	11.0472	12.4426	13.7513	14.4845	16.5857	18.2174	16.2551	21.0533	23.1852	30.9902	27.4192	26.1203	22.0223	22.7351	18.6144
ARAF	12.4759	13.3024	6.57165	16.6477	16.6457	14.7869	13.8158	12.1638	10.4395	14.6034	15.2948	10.0129	6.91676	4.81382	6.90267	16.4256	14.4222	14.2137	10.8132	13.8605	5.98746	12.5373	9.45061	5.82882	16.0916	15.1396	13.8489	7.44264	9.42094	10.5516	7.57926	5.89069	6.83802	10.0794	12.0601	9.66861	41.1046	31.6128	28.3586	11.3914	8.48724	9.06674	11.4365	10.3376	11.1434	17.8877	15.7839	14.7681
ARAP1	2.73736	2.39524	2.67566	3.36151	8.66905	8.4583	5.3796	10.6011	9.43359	7.73229	5.39159	3.99538	6.85572	4.93778	4.44218	6.84355	4.7024	3.01834	5.02737	5.53648	1.79333	7.89142	4.35315	3.42234	1.60923	1.13487	9.63786	5.19657	5.70761	12.3987	6.00883	5.54108	6.61164	9.11814	6.18106	5.99525	8.67602	10.2872	1.67828	8.29405	4.03258	4.22568	3.842	2.96736	4.26852	2.42333	4.27719	4.20973
ARAP2	12.5969	11.7346	11.7019		0.00536651	0.0132141	4.84535	2.0222	4.59972	9.30609	6.37564	9.39418	5.72102	8.02827	6.87255	11.4446	9.97962	7.10341	0.710965	0.728514	0.956792	5.08181	5.71234	6.01951	7.45681	7.50489	6.12926	11.2731	12.4712	10.4444	6.5744	5.46537	4.79736	6.05678	4.01238	4.2254	0.664939	0.852489	1.89656	2.05369	2.69561	2.94944	3.87282	6.71564	3.36312	5.7146	7.87736	4.74639
ARAP3	0.494889	0.48386	0.413773	0.0455062			5.31071	7.43736	5.58175	0.452628	0.29702	0.366112	0.0440977	0.076675	0.0455422	0.0206367	0.0639928	0.0491743	0.807191	1.23429	0.633476	1.80479	1.674	1.53918	0.547232	0.845146	0.573122	1.59129	1.79433	2.41262	1.48049	1.64896	1.73508	0.0230517	0.0382025		1.7463	1.6116	0.987878	0.076684	0.128836		1.53977	1.12412	1.74152	0.0736224	0.168439	0.106212
ARCN1	41.5295	37.4002	34.5279	41.1633	32.3632	33.0059	31.2349	28.0285	28.1766	25.6917	24.6747	26.5272	30.9483	32.2886	31.4391	18.6755	22.4028	24.2484	34.8946	33.9155	35.7635	32.9453	34.0716	36.3941	25.6038	26.4404	21.6638	31.7295	32.2309	28.7373	29.7571	29.0143	26.5781	21.7928	22.3013	23.7495	30.3375	33.6513	34.2792	26.2623	31.7986	26.0979	20.0717	17.056	18.8257	33.1011	35.1208	29.4106
AREG	1.0248	1.44483	1.1664	0.180295	0.0529191	0.0170045			0.0459563	2.32691	3.10722	3.21164				14.8935	18.146	12.1544	0.0354243	0.0351603		3.62778	6.00652	4.25625	20.5008	22.5207	18.858	12.1607	14.3341	13.4009	1.89761	2.24692	1.24634	19.1546	18.8653	22.3606	0.0404848			0.355192	0.126827	0.463496	2.33555	2.21652	2.47626	18.6548	24.7486	21.2067
AREGB	2.05472	1.65357	1.05148	0.137155	0.145659	0.0243243			0.0467946	4.14102	4.4086	3.69651	0.0795487			14.2036	11.7458	13.7437	0.0354593	0.0502175		4.56941	4.6621	5.33418	26.4883	27.2385	23.438	15.188	16.7636	14.9503	2.64268	2.01091	1.9461	16.4907	18.9769	21.837	0.0410625			0.348063	0.0919924	0.429685	3.46233	1.85787	2.0192	24.1987	25.1685	21.8064
AREL1	11.2579	9.99081	7.19907	17.5019	14.7266	11.3189	10.7605	8.46051	8.30157	17.9536	14.3322	18.4695	15.025	18.0082	16.0905	8.45108	9.43868	11.4888	12.4853	12.6388	12.5041	13.5074	14.0095	13.3727	11.2339	13.949	11.8546	16.651	15.7682	12.5286	9.71024	12.7703	10.5119	12.3521	14.5498	11.6323	22.026	21.5894	22.938	12.3768	13.8773	12.2464	11.7704	11.0069	8.87748	14.1596	11.4955	9.93465
ARF1	86.0426	118.226	122.468	105.001	182.691	207.643	120.598	154.802	118.306	191.872	185.309	146.446	287.464	257.624	234.264	280.266	219.745	215.216	223.937	238.056	189.984	201.612	171.491	105.932	162.305	127.294	194.861	201.451	233.722	270.37	404.136	364.363	422.098	155.058	144.406	100.238	320.191	221.895	141.801	388.109	278.087	253.042	108.494	63.6782	149.284	169.559	245.48	212.97
ARF3	44.5347	36.6756	39.6161	61.4386	49.3389	55.9203	32.3915	35.412	35.3087	28.1978	26.3813	25.3728	25.5458	27.9684	18.8365	42.1741	37.5183	50.1119	48.1334	47.3281	45.2891	64.0577	61.9662	59.9725	51.3188	52.3388	34.2559	60.7106	54.5372	48.4296	52.6128	54.8868	46.4213	30.8055	32.5308	31.836	21.9861	29.0558	35.49	46.5928	49.6693	48.5758	27.739	21.9308	22.3029	64.4491	70.0422	46.9895
ARF4	197.932	173.966	158.07	216.262	168.423	160.313	99.6754	84.2399	85.3896	92.8846	88.9401	104.232	89.5474	88.7616	87.3748	127.502	132.854	140.254	160.006	150.877	153.865	173.919	187.381	193.129	136.006	136.584	119.229	95.1098	96.6226	79.9719	137.938	142.77	128.599	46.558	49.9473	52.951	114.941	129.88	130.699	72.8171	85.4692	80.6565	84.0984	63.6802	80.8046	122.215	119.236	100.582
ARF5	79.3787	83.7521	86.8667	39.5163	43.113	43.3426	59.5531	75.2107	67.6356	93.2145	76.7728	75.9611	99.5146	84.9213	83.4064	44.2359	37.1904	44.7864	89.5213	74.7063	65.0996	69.1249	55.135	47.9932	67.9399	55.7787	64.1657	59.1879	64.1661	68.7617	160.702	135.292	149.321	72.9871	74.4679	58.1425	88.8872	78.5384	65.2177	96.7456	83.0919	75.2151	38.001	21.1804	40.3789	35.6641	50.6329	42.0094
ARF6	11.5045	17.8253	16.3904	16.9752	24.6117	26.0102	9.54193	16.2114	15.2706	38.6402	30.4259	30.7061	14.1429	14.4076	11.0469	12.3634	10.4722	12.4605	11.8694	11.3959	7.5222	29.2257	24.8696	19.4604	24.1496	21.4248	30.3428	18.5492	20.1088	26.9112	30.5879	26.0606	27.2972	25.3263	30.7128	26.5025	18.0921	11.4539	8.45564	20.2822	16.2458	13.4827	7.82458	7.35525	10.4266	28.025	38.4638	31.8949
ARFGAP1	10.0453	14.4534	20.005	8.29693	14.9545	15.4401	11.8592	11.582	10.2178	15.6661	14.1457	13.1286	12.5911	11.1119	10.8141	12.9192	13.4106	11.388	15.1521	11.7281	15.0513	17.3371	11.3192	4.81508	7.84474	7.27044	14.8768	9.56239	9.82672	16.3455	12.1633	9.89269	12.9972	39.9527	34.5943	21.3299	28.8653	21.585	15.4117	26.6579	14.3589	15.4168	13.6958	10.2355	15.6428	11.3419	17.3223	13.9578
ARFGAP2	34.5211	38.121	29.2053	37.4624	21.8974	25.461	34.0215	27.3627	27.8239	31.2792	31.4045	29.5324	44.7641	47.7047	36.9075	58.5044	49.3141	59.2388	32.4315	32.9138	35.0345	65.2692	47.7295	40.178	51.7239	39.4224	36.4285	51.1415	52.1642	44.0094	33.1841	41.11	28.0906	52.3111	56.0378	39.0461	25.3557	34.2231	27.2361	28.1493	35.2009	21.2396	42.4947	25.4929	39.4259	73.0862	65.6663	54.0195
ARFGAP3	16.1224	13.1734	14.1582	27.3024	22.8854	23.1687	22.8785	24.2782	23.8502	38.7951	38.5288	45.0191	7.48292	9.77447	7.97553	18.5786	17.9453	21.7249	23.0407	25.4695	22.9074	23.3935	25.9337	24.791	27.908	27.8607	20.8846	30.7115	28.8221	24.0743	47.2638	42.4701	38.0692	5.45661	7.32045	5.89903	30.4551	30.1846	36.459	7.34443	8.19825	8.36458	16.634	12.2439	13.1707	14.2162	15.84	14.0902
ARFGEF1	20.6647	18.0328	18.0963	22.9978	22.7868	20.3305	22.2025	21.0062	33.75	17.9864	18.4388	28.0973	21.9463	21.2432	22.3714	30.8615	29.3154	32.7241	51.6497	53.6171	56.3862	17.5995	22.5613	20.2644	34.7685	41.8956	29.3064	27.4222	26.7354	29.0253	30.5735	32.3961	28.7764	34.0882	19.8149	39.455	21.0697	18.1011	24.3174	19.5102	18.6179	31.5108	7.73709	8.28741	8.02408	22.7183	22.8493	18.7328
ARFGEF2	43.8923	37.9168	33.6767	21.1517	17.6479	15.2456	15.0628	15.1211	14.3467	20.1368	19.5129	20.7314	7.1463	7.54183	6.00578	76.6548	77.6354	87.2545	56.0856	55.8441	54.3834	21.5617	20.6117	22.1302	23.1398	21.5745	19.4207	22.3441	21.1701	17.4143	22.6597	24.2453	20.0403	17.6323	19.8974	19.9317	12.4078	14.9039	15.2284	39.782	47.3243	43.6708	16.8325	13.9934	14.9167	25.2188	22.5764	21.99
ARFIP1	73.0801	66.9199	55.7952	19.1504	17.2345	14.4189	24.3383	25.1906	20.6895	18.035	14.8749	16.9923	15.3434	15.2297	19.2621	22.0363	28.9297	27.9721	22.2038	21.0081	20.3365	37.9159	44.8387	41.7435	30.8637	35.4268	29.7819	28.6037	29.0832	24.315	17.9465	17.9026	16.8793	18.4086	19.8725	18.6716	18.821	19.7678	24.217	12.0758	16.6286	19.0522	9.40042	10.2898	9.74359	32.6304	30.707	28.7478
ARFIP2	29.2763	34.1002	31.1183	14.353	14.6858	13.0055	20.7773	21.9412	18.393	29.7748	23.6213	28.0364	49.5671	44.2342	41.733	60.4445	62.0628	62.6926	12.4106	13.3871	9.991	30.4624	24.4683	17.7243	13.0348	9.2767	11.0352	22.3078	23.822	17.347	16.4271	15.7323	14.2453	16.8037	17.2316	12.2328	13.9576	17.5622	9.18248	70.6546	71.1152	59.7292	14.1439	10.3627	15.5953	37.7302	38.7232	33.8897
ARFRP1	2.17067	4.70135	6.67487	3.33469	10.0143	8.50251	5.40758	6.25269	7.40153	3.69277	2.04267	2.14348	3.41795	3.132	2.54822	53.2967	43.7283	35.6401	7.02131	5.50503	2.34999	9.15605	6.52752	4.5916	4.19886	3.49445	7.80305	3.13052	3.05129	5.01291	13.4758	10.4885	12.0192	6.93344	5.31867	4.37354	14.6078	7.71561	5.77167	11.9766	4.77407	6.26038	9.77292	9.35825	11.7234	3.80361	6.22605	4.79009
ARG2	2.80083	3.15758	2.21091	5.70731	4.22895	3.65549	4.09122	3.49417	4.35575	1.18123	1.13918	1.72863	4.85412	5.88422	6.08697	0.43045	0.917183	1.00166	0.907017	2.05644	3.22898	13.5788	12.9826	12.1933	1.55049	2.06522	1.59482	2.45614	3.21836	2.15807	11.2736	10.3812	7.60338	0.433148	0.33303	0.598796	1.24228	1.26487	1.35243	1.62346	1.82734	1.74436	1.99206	1.22619	1.52809	9.59849	8.75348	7.13401
ARGLU1	9.80206	4.79046	6.91581	9.60158	7.90965	9.54442	15.3551	14.7289	17.5589	8.05436	10.9143	6.92588	9.53001	8.60205	9.86024	7.77547	13.0641	10.3864	6.30167	8.61579	7.53956	12.9267	14.0034	11.6339	6.03003	15.7719	4.31295	8.85123	7.5337	13.623	9.74247	6.67988	5.34102	5.96585	5.68599	4.16869	13.5091	11.2342	8.25946	23.4539	10.3732	14.645	22.9531	7.649	8.24234	8.248	9.90022	6.60091
ARHGAP1	7.7821	11.7411	9.75596	15.8697	18.1855	18.6728	19.9032	22.1778	22.2785	9.10599	10.9332	7.59634	17.374	14.4966	12.5261	42.3428	38.9171	40.8748	14.3814	14.3474	12.0187	11.8841	10.1693	6.73909	10.1745	7.04209	11.8354	16.3327	17.4511	18.0825	17.0586	17.0635	20.0827	18.4861	15.3468	14.5219	13.1976	14.9865	6.32488	21.9562	17.6771	16.2629	5.82223	6.08635	8.28648	29.3968	36.5231	24.3856
ARHGAP10	89.6072	82.0852	78.4778	7.8857	6.12157	6.3263	3.2403	3.24696	2.48816	3.86	4.77189	4.2634	4.71865	4.26143	4.39874	16.9218	17.8085	18.5881	7.81815	8.08117	5.96038	16.8269	16.5715	17.2006	8.20996	8.14175	6.78615	8.91586	8.05949	8.06395	6.19067	5.47738	5.15583	8.66365	9.48981	9.5726	8.79352	9.60508	8.82329	9.5152	10.3337	11.2401	2.68762	3.2387	2.57286	0.767764	0.99647	0.866252
ARHGAP11A	57.5177	47.7663	46.7279	30.6971	21.0702	21.3182	40.0426	35.4567	36.0741	37.2288	33.5927	40.4525	24.9566	19.166	23.3185	11.3136	11.0946	14.5697	34.8877	34.9877	35.7583	39.3942	41.1838	52.6461	56.6082	55.8611	45.857	24.5532	23.4497	22.9505	31.2094	35.2531	33.3584	11.7074	10.5826	10.9144	34.416	42.8408	45.1815	25.4497	26.5485	23.214	54.7204	45.4965	48.3064	26.9312	23.9865	21.8052
ARHGAP11B	10.0941	10.7614	10.4039	9.12969	6.60799	4.97191	13.6098	10.0651	10.0059	8.81583	10.3478	5.66044	7.32205	9.26402	5.17354	5.47205	7.02172	4.72037	7.63182	5.54992	5.96702	8.17391	8.4878	10.0538	7.81087	8.87578	5.65066	6.73884	7.83843	4.56936	14.5681	8.47071	9.71243	6.90962	5.21871	5.97699	5.98803	6.47563	5.17795	10.2892	9.31665	9.88933	33.0885	28.1936	26.9041	7.35502	7.05675	4.1194
ARHGAP12	33.2362	27.2573	25.6213	25.1959	18.5689	18.2049	15.7654	14.5224	14.2226	32.2809	33.3837	36.5468	22.489	24.8857	23.6299	7.19379	7.29549	10.7161	14.3803	14.9436	14.1734	35.6005	40.838	42.7207	25.3783	26.8334	21.7342	24.2617	23.2674	19.3499	34.4163	36.4219	33.2666	24.3475	27.7175	28.2951	10.5331	11.6024	13.3857	4.53279	8.70921	4.98982	14.3438	11.5763	12.4821	8.71605	9.68907	7.0119
ARHGAP17	15.5227	11.181	14.076	34.5511	20.7214	17.139	33.7162	22.4837	23.4778	4.55572	6.47089	6.649	28.1804	22.6932	19.1927	25.8852	30.7683	27.9565	18.1492	16.8271	22.7128	8.34857	8.03078	11.2937	10.443	8.54212	3.52402	11.3169	11.9658	13.0577	19.5561	22.2698	24.4768	14.498	7.61633	9.61789	18.9886	18.312	20.9881	20.6263	25.7634	26.4908	11.4864	10.314	9.1869	8.41773	10.1452	4.77244
[truncated: 14,281 more rows]
