# Supplementary material for: PTEN and DNA-PK determine sensitivity and recovery in response to WEE1 inhibition in human breast cancer
Source: eLife. 2020 Jul 6;9:e57894. doi: 10.7554/eLife.57894 (PMC7338058; doi:10.7554/eLife.57894)
Supplement: Supplementary file 4. [file elife-57894-supp4.xlsx]

## Sheet: Sheet1
	Company	Clone	Species	Cat#
AKT	Cell signaling technology	9272	Rabbit monoclonal	9272S
BrdU	Abcam	ab6326	Rat monoclonal	BU1/75 (ICR1)
CDC25A	Santa Cruz Biotechnology	F-6	mouse monoclonal	sc-7389
CDT1	Santa Cruz Biotechnology	F-6	mouse monoclonal	sc-365305
CHK1	Cell signaling technology	2G1D5	Mouse monoclonal	2360S
Cyclin A	Santa Cruz Biotechnology	H-432	Rabbit polyclonal
Cyclin E	Santa Cruz Biotechnology	HE12	mouse monoclonal	sc-247
DNA-PKcs	Santa Cruz Biotechnology	A1918	mouse monoclonal	G12
GAPDH	Santa Cruz Biotechnology	A0515	Rabbit polyclonal	sc-25778
gH2AX	Cell signaling technology	20E3	Rabbit monoclonal	9718S
KI67	Abcam	SP6	Rabbit monoclonal	ab16667
PALB2	Santa Cruz Biotechnology	G-13	Goat polyclonal	sc-160647
pH3S10	Upstate	JBW301	mouse monoclonal	05-636
pS2056-DNA-PK	Abcam	GR258801-16	mouse monoclonal	ab18192
pS33-RPA32	Invitrogen	SJ2453762	Rabbit polyclonal	PA5-39809
pS345-CHK1	Cell signaling technology	S345	Rabbit monoclonal	2348S
pS473-AKT	Cell signaling technology	D9E	Rabbit monoclonal	4060S
pT2609-DNA-PK	Abcam	GR309667-20	mouse monoclonal	ab18336
pT68-CHK2	Cell signaling technology	C13C1	Rabbit monoclonal	2197S
PTEN	Cell signaling technology	138G6	Rabbit monoclonal	9559S
pY15-CDK1	Santa Cruz Biotechnology	J1617	Mouse monoclonal	sc-136014
pY15-CDK2	Cell signaling technology	C10A11	Rabbit monoclonal	4539S
RAD51	Cell signaling technology	D4B10	Rabbit monoclonal	8875S
RPA32	Santa Cruz Biotechnology	9H8	Mouse monoclonal	sc-56770
